# Supplementary material for: Multi-omics analysis detected multiple pathways by which pomegranate punicalagin exerts its biological effects in modulating host–microbiota interactions in murine colitis models
Source: Royal Society of Chemistry journal article supplement (doi:10.1039/d3fo00286a), 2023-01-01
Supplement: d3fo00286a1.pdf [file d3fo00286a1.pdf]

**Supplementary information**

**Multi-omics analysis detected multiple pathways by which the pomegranate punicalagin exerts its biological effects in  
modulating host-microbiota interactions in murine colitis models**

Fang Liu, Allen D. Smith, Thomas T. Y. Wang, Quynhchi Pham, Haiyan Yang, Robert W. Li

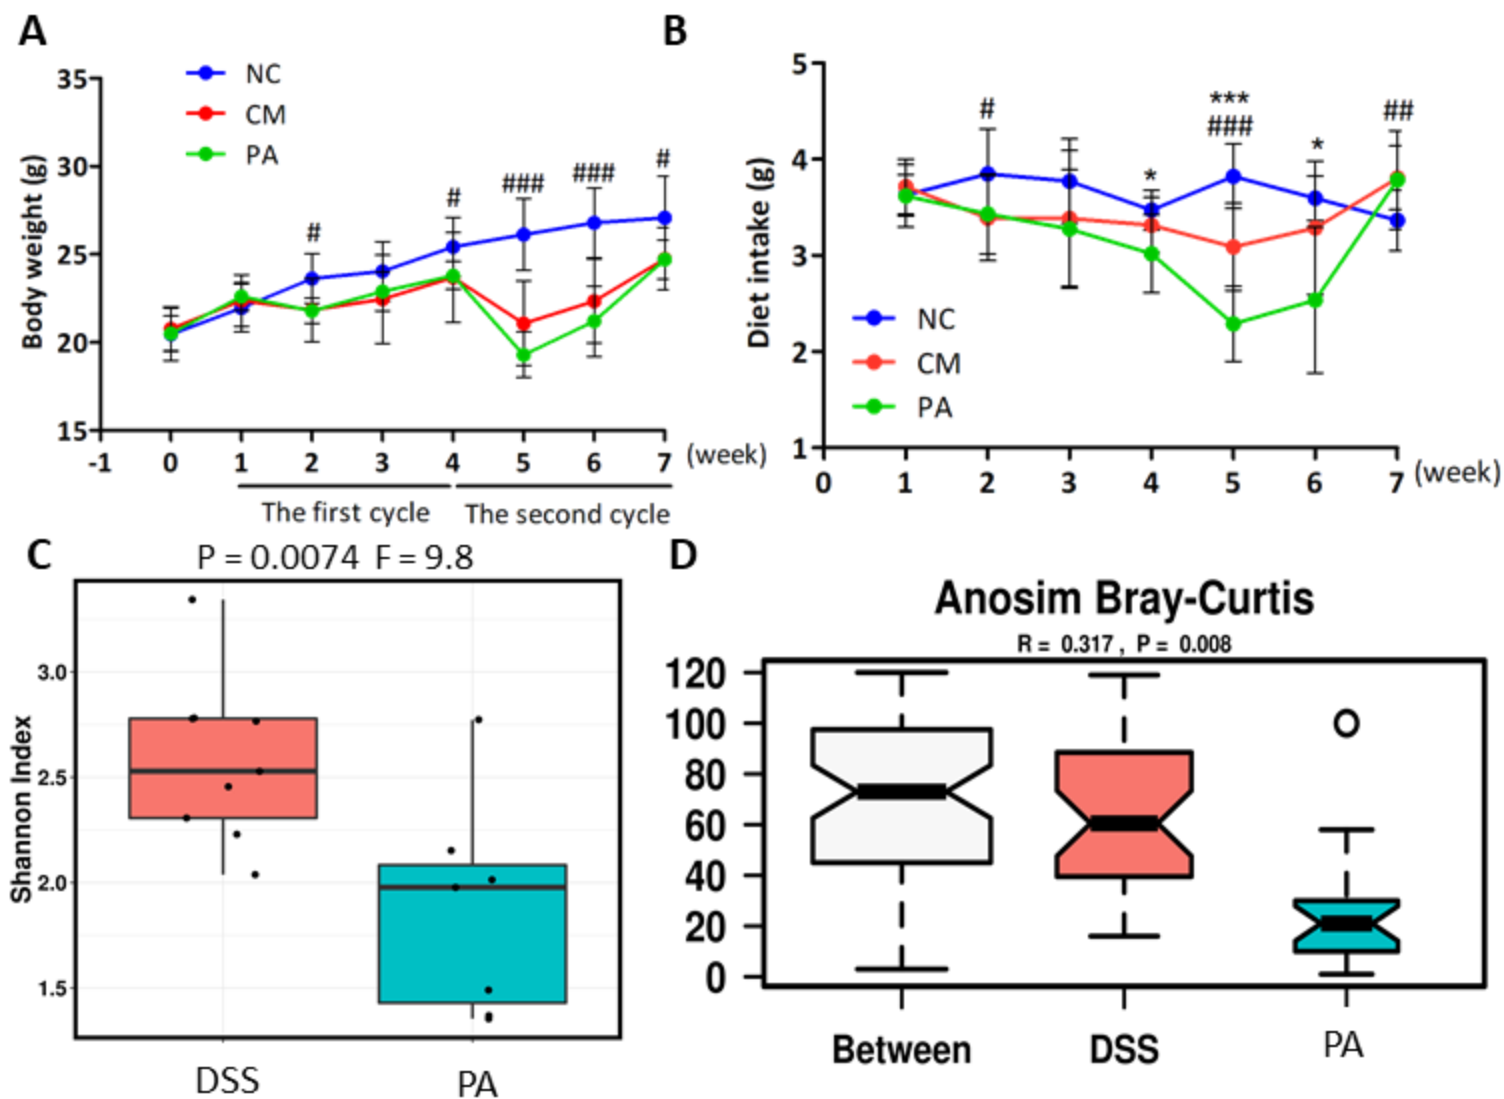

Figure S1. The effect of punicalagin ingestion on physiological and molecular indicators in dextran sodium sulfate (DSS) induced colitis mice. The changes in the bodyweight (A) and feed intake (B) during the experimental duration. NC: Healthy control mice without supplementation. CM: DSS induced colitis mice without supplementation. PA. DSS induced colitis mice with 50-day PA supplementation. NC vs CM: ###  $P < 0.001$ ; #  $P < 0.01$ ; CM vs PA: \*\*\*  $P < 0.001$ ; \*\*  $P < 0.01$ ; \*  $P < 0.05$ . (C). The Shannon  $\alpha$  diversity index was significantly reduced by PA supplementation in DSS induced colitis mice ( $P = 0.0074$ ). (D). Analysis of similarities (ANOSIM) at the genus level suggests a clear separation in the  $\beta$  diversity in the gut microbial communities with PA or without PA supplementation (DSS;  $P = 0.008$ ).

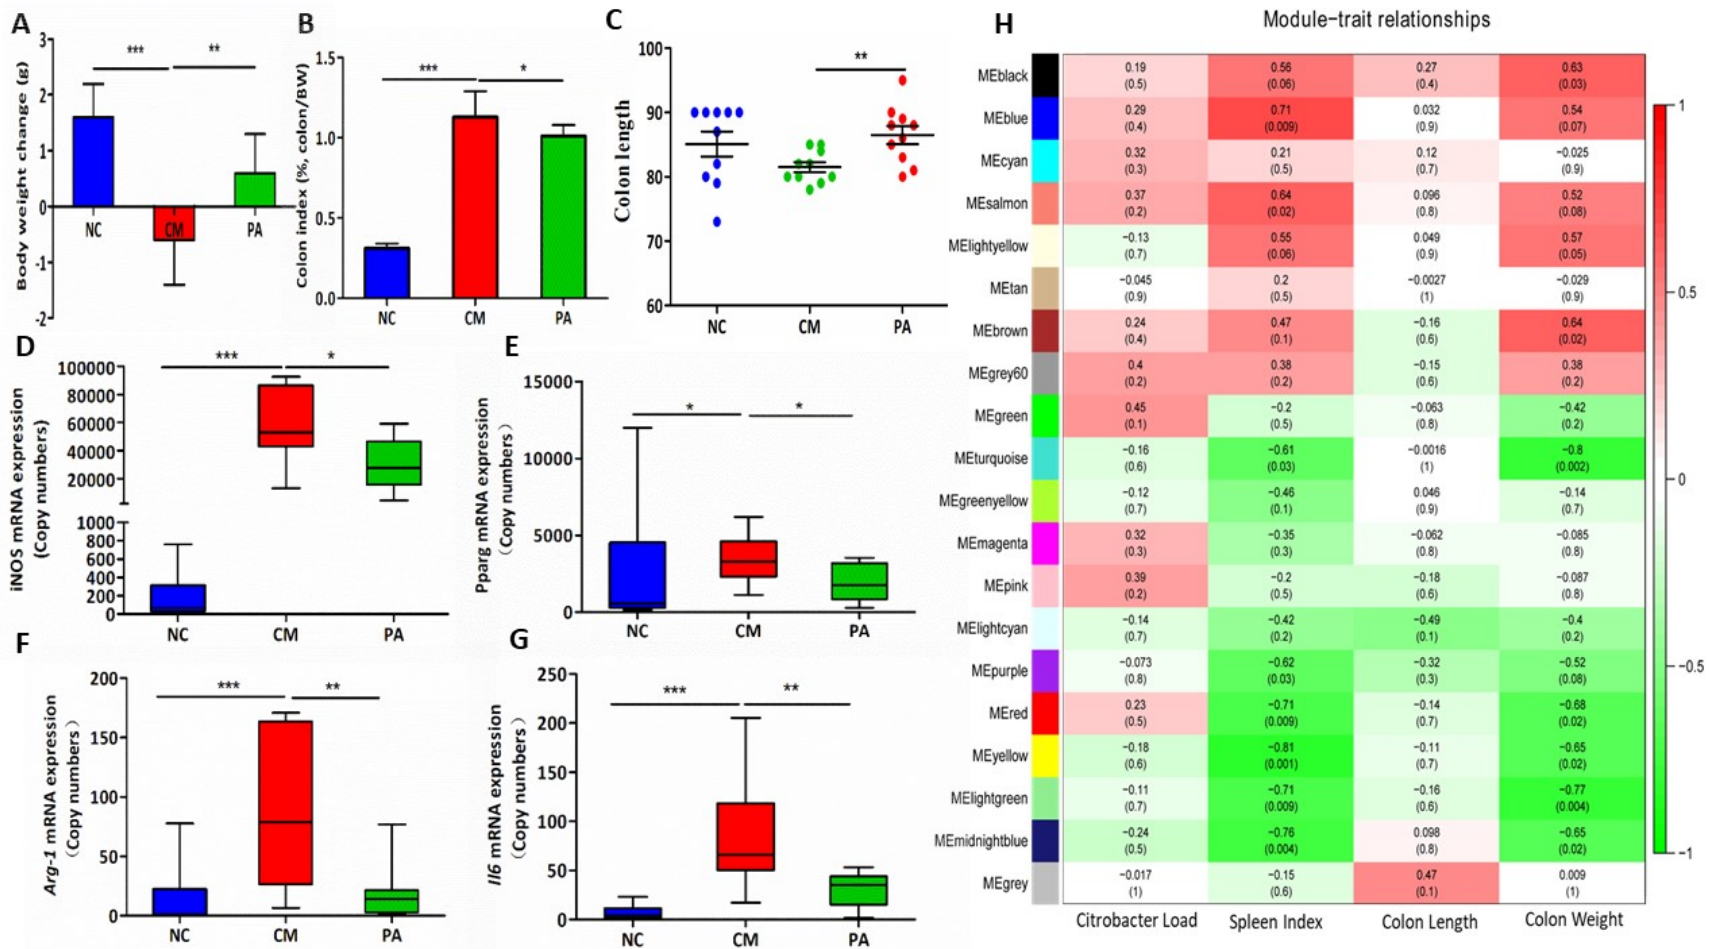

Figure S2. Punicalagin affected the colitis related phenotypes and induced changes in the colon transcriptome of *Citrobacter rodentium* infected mice. (A): Punicalagin (PA) supplementation improved body weight (BW) loss associated with the infection. (B): PA reduced the colon index. (C): Colon length (mm). PA reduced the mRNA expression of select genes in the mouse proximal colon tissue. (D): Nos2 (iNOS). (E): Pparg. (F): Arg1. (G): Il6. (H): The module-trait relationships detected in the network *C. rodentium* induced colitis mice (MD) using WGCNA. The number represents the correlation coefficient (and *P* value in parentheses). NC: Uninfected control mice without supplementation. CM: *C. rodentium* induced colitis mice without supplementation. PA: *C. rodentium* induced colitis mice with 17-day PA supplementation. *N* = 10 per group. \*\*\* *P* < 0.001; \*\* *P* < 0.01; \* *P* < 0.05.

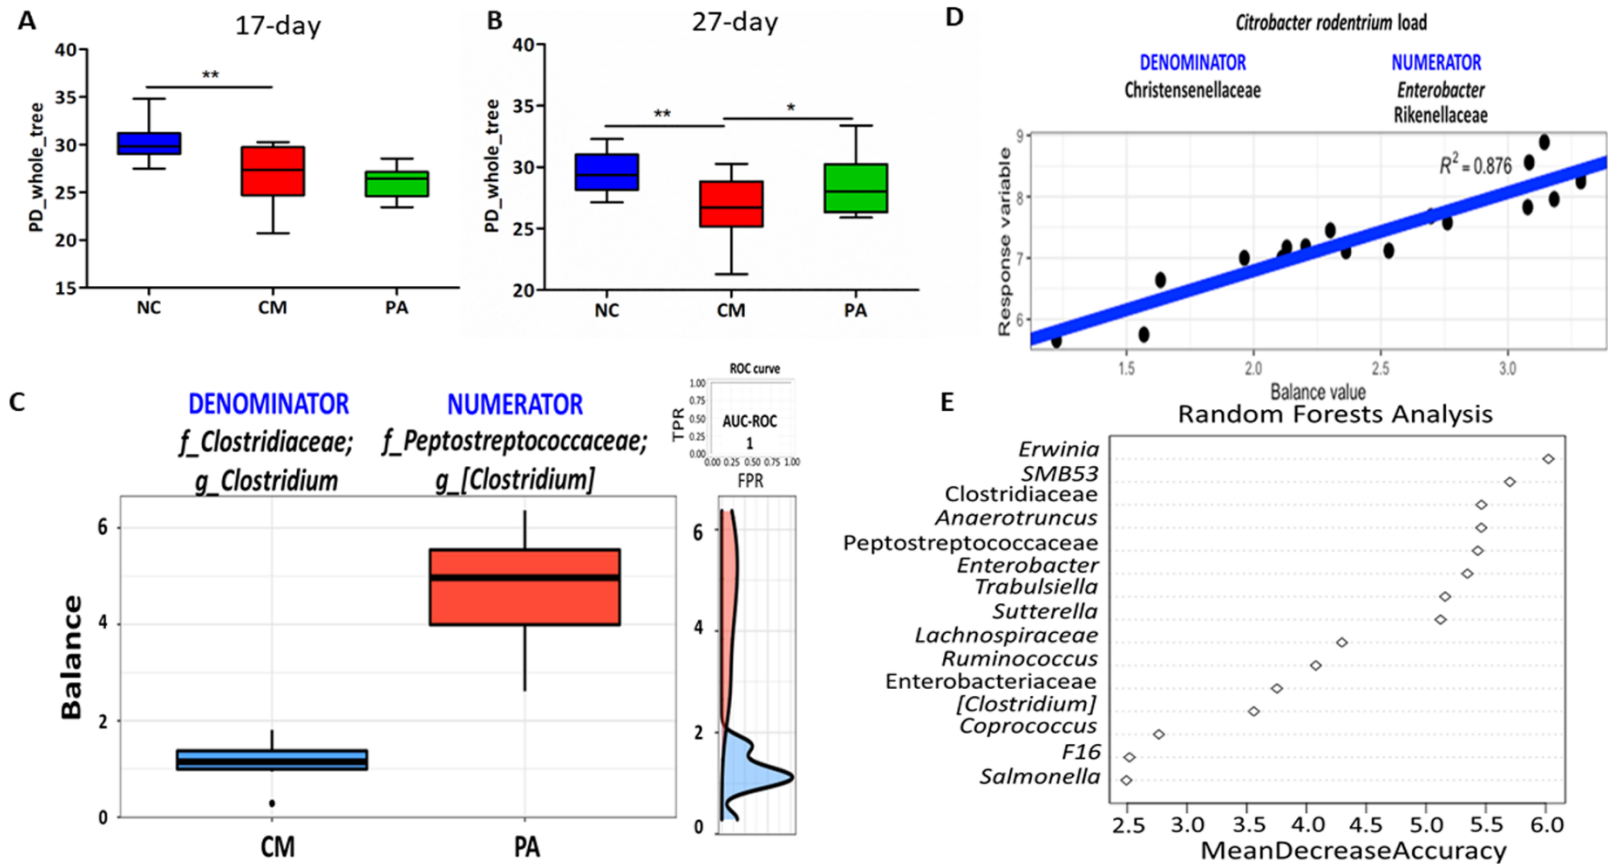

Figure S3. Important microbiome features and microbial signatures for colitis related parameters in the *Citrobacter rodentium* infection mouse model. A longer-term punicalagin (PA) supplementation (27 days) restored Phylogenetic diversity (PD) from the repressed level resulting from the infection. (A): 17-day PA supplementation did not improve PD. (B): 27-day PA supplementation. (C): A molecular signature or balance consisting of four taxa, including an unclassified genus in the family *Peptostreptococcaceae* and *[Clostridium]* (Numerator) and an unclassified genus in the family *Clostridiaceae* and *Clostridium* (Denominator), had a high predictive accuracy in distinguishing the gut microbial communities with and without PA supplementation. (D): Microbial signatures or balances with high predictive accuracy for the *C. rodentium* bacterial load ( $R^2 = 0.876$ ). (E): The Random Forests algorithm identified the 15 most important taxa that distinguished the *C. rodentium* infection status based on the scaled mean decrease accuracy. NC: Uninfected control mice without supplementation. CM: *C. rodentium* induced colitis mice without supplementation. PA: *C. rodentium* induced colitis mice with PA supplementation. \*\*  $P < 0.01$ ; \*  $P < 0.05$ .

# Differential network

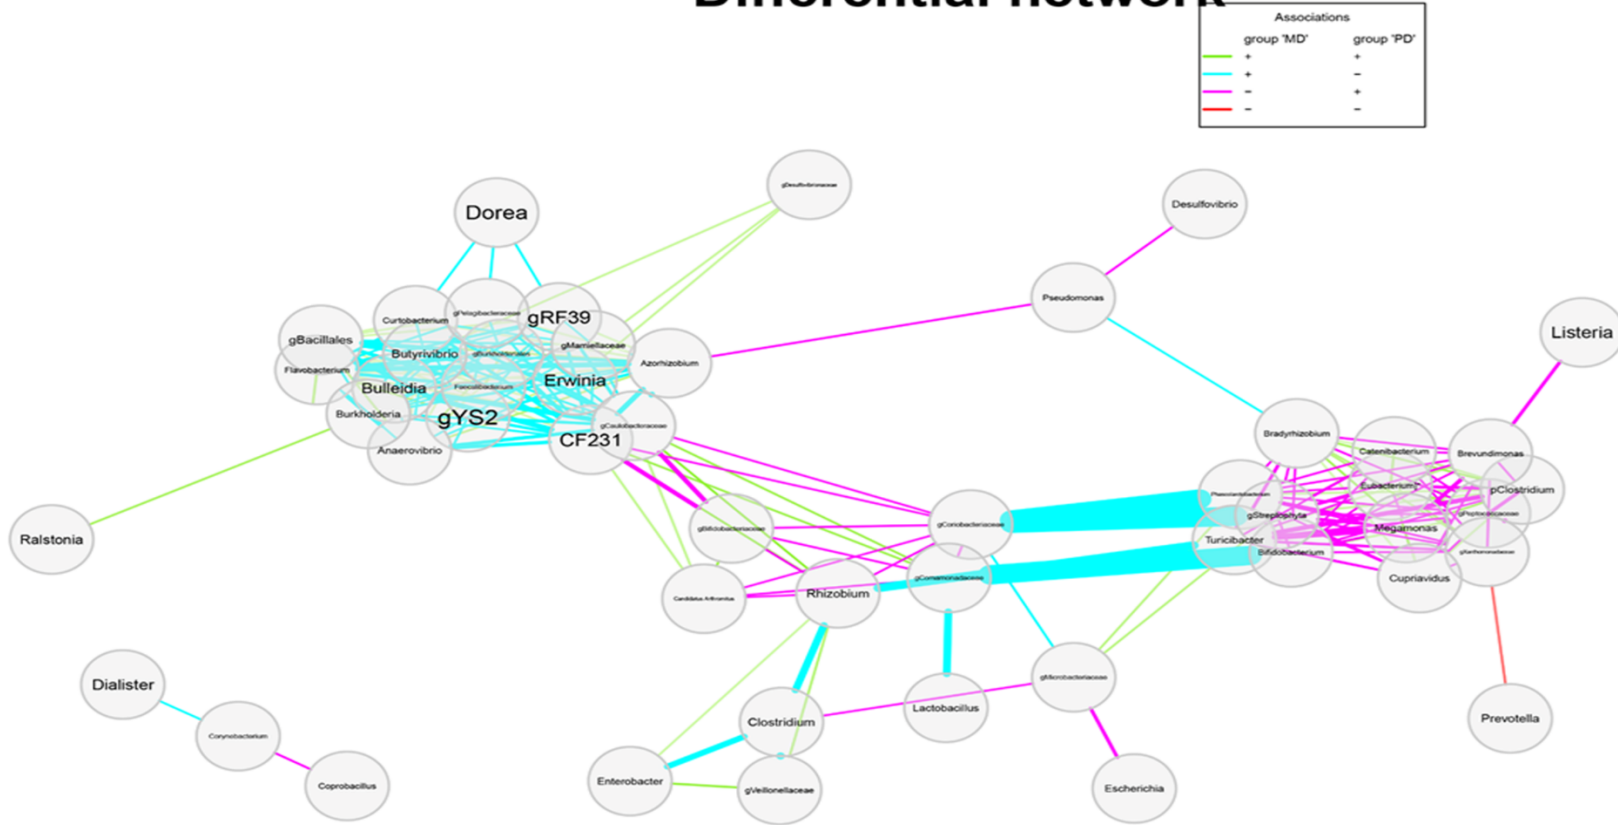

Figure S4. Differential networks constructed and compared using the NetCoMi algorithm. The color represents the differential association in the networks with and without 27-day punicalagin (PA) supplementation. MD: *Citrobacter rodentium* infected mice without PA supplementation. PA: *C. rodentium* infected mice with PA supplementation.

**Table S1: The dietary formulations used in the study.**

| Formulation                     | D10012M<br>(AIN-93M) |             | D10012X<br>(AIN-93X) (PA) |             |
|---------------------------------|----------------------|-------------|---------------------------|-------------|
|                                 | gm%                  | kcal%       | gm%                       | kcal%       |
| Protein                         | 14                   | 15          | 14                        | 15          |
| Carbohydrate                    | 73                   | 76          | 73                        | 76          |
| Fat                             | 4                    | 9           | 4                         | 9           |
| Total                           |                      | 100         |                           | 100         |
| kcal/gm                         | 3.85                 |             | 3.85                      |             |
| <b>Ingredient</b>               | <b>gm</b>            | <b>kcal</b> | <b>gm</b>                 | <b>kcal</b> |
| Casein                          | 140                  | 560         | 140                       | 560         |
| L-Cystine                       | 1.8                  | 7           | 1.8                       | 7           |
| Corn Starch                     | 495.692              | 1983        | 495.692                   | 1983        |
| Maltodextrin 10                 | 125                  | 500         | 125                       | 500         |
| Sucrose                         | 100                  | 400         | 100                       | 400         |
| Cellulose, BW200                | 50                   | 0           | 49.758                    | 0           |
| Soybean Oil                     | 40                   | 360         | 40                        | 360         |
| Palm Oil                        | 0                    | 0           | 0                         | 0           |
| Safflower Oil, High Oleic       | 0                    | 0           | 0                         | 0           |
| Safflower Oil                   | 0                    | 0           | 0                         | 0           |
| t-Butylhydroquinone             | 0.008                | 0           | 0.008                     | 0           |
| Mineral Mix S10022M             | 35                   | 0           | 35                        | 0           |
| Vitamin Mix V10037              | 10                   | 40          | 10                        | 40          |
| Choline Bitartrate              | 2.5                  | 0           | 2.5                       | 0           |
| <b>Punicalagin (PA)</b>         | <b>0</b>             | <b>0</b>    | <b>0.242</b>              | <b>0</b>    |
| FD&C Yellow Dye #5              | 0                    | 0           | 0                         | 0           |
| FD&C Red Dye #40                | 0                    | 0           | 0                         | 0           |
| FD&C Blue Dye #1                | 0                    | 0           | 0                         | 0           |
| <b>Total</b>                    | <b>1000.00</b>       | <b>3850</b> | <b>1000.00</b>            | <b>3850</b> |
| <b>Test compounds:</b>          |                      |             |                           |             |
| <b>Punicalagin (µg/gm diet)</b> | <b>0</b>             |             | <b>242</b>                |             |

**Table S2. The primers used for real-time PCR in the study.**

| Symbol | GeneID      | Forward primer          | Reverse Primer           | Species             |
|--------|-------------|-------------------------|--------------------------|---------------------|
| Il10   | NM_010548.2 | GGTTGCCAAGCCTTATCGGA    | ACCTGCTCCACTGCCTTGCT     | <i>Mus musculus</i> |
| Il13   | NM_008355.3 | AGACCAGACTCCCCTGTGCA    | TGGGTCCTGTAGATGGCATTG    | <i>Mus musculus</i> |
| Il17a  | NM_010552.3 | ATCCCTCAAAGCTCAGCGTGTC  | GGGTCTTCATTGCGGTGGAGAG   | <i>Mus musculus</i> |
| Il1b   | NM_008361.4 | CCAGCTTCAAATCTCACAGCAG  | CTTCTTTGGGTATTGCTTGGGATC | <i>Mus musculus</i> |
| Il4    | NM_021283.2 | ACAGGAGAAGGGACGCCAT     | GAAGCCCTACAGACGAGCTCA    | <i>Mus musculus</i> |
| Il5    | NM_010558.1 | AGCACAGTGGTGAAAGAGACCTT | TCCAATGCATAGCTGGTGATTT   | <i>Mus musculus</i> |
| Il6    | NM_031168.2 | TCCAGTTGCCTTCTTGGGAC    | GTACTCCAGAAGACCAGAGG     | <i>Mus musculus</i> |
| Nod2   | NM_145857.2 | CCGCTTTCTACTTGGCTGTC    | GTGATTTGCAGGTTGTGTGG     | <i>Mus musculus</i> |
| Nos2   | NM_010927.4 | CGAAACGCTTCACTTCCAA     | TGAGCCTATATTGCTGTGGCT    | <i>Mus musculus</i> |
| Tlr4   | NM_021297.3 | GCCTTTCAGGGAATTAAGCTCC  | AGATCAACCGATGGACGTGTAA   | <i>Mus musculus</i> |
| Tlr9   | NM_031178.2 | ACTCCGACTTCGTCCACCT     | GGCTCAATGGTCATGTGGCA     | <i>Mus musculus</i> |
| Tnf    | NM_013693.3 | CCCTCACACTCAGATCATCTTCT | GCTACGACGTGGGCTACAG      | <i>Mus musculus</i> |

**Table S3. Taxa significant impacted by PA supplementation in the *Citrobacter rodentium* induced colitis model.** The significant taxa were identified using LEfSe and independently validated using ALDEx2 and ANCOM algorithms. The number under Relative abundance represented Mean  $\pm$  SD. Both linear discriminant analysis scores (LDA) and *P* values were calculated using LEfSe. NC: Uninfected control mice without PA supplementation; CM: *Citrobacter rodentium* infected colitis mice without PA supplementation. PA: *Citrobacter rodentium* infected colitis mice with PA supplementation. The data were derived from the ASV table generated using QIIME2. The genus *Akkermansia* is the sole representative of the phylum *Verrucomicrobia*.

| Taxon                  | Rank   | LDA  | <i>P</i> value | Relative abundance  |                     |                     | Validated      |
|------------------------|--------|------|----------------|---------------------|---------------------|---------------------|----------------|
|                        |        |      |                | NC                  | CM                  | PA                  |                |
| <i>TM7</i>             | Phylum | 3.51 | 0.0104         | 0.0280 $\pm$ 0.0234 | 0.0007 $\pm$ 0.0022 | 0.0081 $\pm$ 0.0098 |                |
| <i>Verrucomicrobia</i> | Phylum | 3.51 | 0.0469         | 0.2379 $\pm$ 0.3639 | 0.7718 $\pm$ 1.4781 | 1.2481 $\pm$ 0.9326 | ALDEx2         |
| <i>Akkermansia</i>     | Genus  | 3.43 | 0.0469         | 0.2379 $\pm$ 0.3639 | 0.7718 $\pm$ 1.4781 | 1.2481 $\pm$ 0.9326 | ALDEx2 & ANCOM |
| <i>Clostridium</i>     | Genus  | 2.69 | 0.0042         | 0.0001 $\pm$ 0.0002 | 0.0735 $\pm$ 0.1207 | 0.0001 $\pm$ 0.0002 | ALDEx2 & ANCOM |
| <i>Coprococcus</i>     | Genus  | 3.17 | 0.0193         | 0.8043 $\pm$ 0.6661 | 0.1667 $\pm$ 0.1145 | 0.4562 $\pm$ 0.2985 | ALDEx2 & ANCOM |
| <i>Erwinia</i>         | Genus  | 2.97 | 0.0054         | 0.0000 $\pm$ 0.0000 | 0.0020 $\pm$ 0.0017 | 0.0095 $\pm$ 0.0072 | ANCOM          |
| { <i>Eubacterium</i> } | Genus  | 3.57 | 0.0042         | 0.0005 $\pm$ 0.0014 | 0.6842 $\pm$ 1.6496 | 0.0001 $\pm$ 0.0002 | ALDEx2         |
| [ <i>F16</i> ]         | Genus  | 3.50 | 0.0104         | 0.0464 $\pm$ 0.0356 | 0.0015 $\pm$ 0.0027 | 0.0000 $\pm$ 0.0001 | ANCOM          |
