# Supplementary material for: Multi-omics analysis detected multiple pathways by which pomegranate punicalagin exerts its biological effects in modulating host–microbiota interactions in murine colitis models
Source: Royal Society of Chemistry journal article supplement (doi:10.1039/d3fo00286a), 2023-01-01
Supplement: d3fo00286a2.xlsx [file d3fo00286a2.xlsx]

## Sheet: Sheet1
			PLATFORM	RELATIVE INTENSITY: MEAN (SD)			DSS	DSS
Metabolite	Category	Pathway	ESI (LC/MS)	NC	CM	PA	P value (NC vs CM)	P value (CM vs PA)
tartarate	Xenobiotics	Food Component/Plant	ESI negative	2.609 (1.228)	1.295 (0.601)	4.590 (1.867)	0.0108	0.0029
piperidine	Xenobiotics	Food Component/Plant	ESI positive	0.091 (0.060)	0.128 (0.071)	0.033 (0.012)	0.244	0.0037
lithocholate	Lipid	Secondary Bile Acid Metabolism	ESI negative	0.184 (0.048)	0.042 (0.034)	0.002 (0.004)	0.0001	0.0041
sebacate (C10-DC)	Lipid	Fatty Acid, Dicarboxylate	LC/MS Polar	0.045 (0.012)	0.020 (0.013)	0.009 (0.003)	0.0019	0.0052
D-urobilin	Cofactors and Vitamins	Hemoglobin and Porphyrin Metabolism	ESI positive	2.830 (0.998)	0.846 (0.576)	2.101 (1.155)	0.0005	0.0079
gamma-glutamylisoleucine*	Peptide	Gamma-glutamyl Amino Acid	ESI positive	1.268 (0.843)	6.366 (3.789)	1.979 (0.971)	0.0036	0.0083
guanine	Nucleotide	Purine Metabolism, Guanine containing	ESI positive	0.918 (0.488)	0.558 (0.538)	1.318 (0.443)	0.1565	0.0092
cholate	Lipid	Primary Bile Acid Metabolism	ESI negative	0.276 (0.192)	0.961 (0.511)	2.740 (1.303)	0.0036	0.0102
imidazole lactate	Amino Acid	Histidine Metabolism	ESI positive	0.112 (0.052)	3.125 (2.815)	9.792 (6.000)	0.0124	0.0103
3-dehydrodeoxycholate	Lipid	Secondary Bile Acid Metabolism	ESI negative	2.874 (1.691)	1.167 (0.807)	0.153 (0.262)	0.0056	0.0115
spermine	Amino Acid	Polyamine Metabolism	ESI positive	2.313 (2.508)	11.707 (7.550)	2.148 (2.109)	0.0078	0.0115
12-ketolithocholate	Lipid	Secondary Bile Acid Metabolism	ESI negative	3.619 (1.729)	0.750 (0.494)	0.122 (0.240)	0.0009	0.0135
2-piperidinone	Xenobiotics	Food Component/Plant	ESI positive	0.242 (0.154)	0.572 (0.852)	2.223 (2.486)	0.4219	0.0148
delta-tocopherol	Cofactors and Vitamins	Tocopherol Metabolism	ESI positive	1.097 (0.180)	1.775 (0.542)	2.543 (0.577)	0.0054	0.0161
urate	Nucleotide	Purine Metabolism, (Hypo)Xanthine/Inosine containing	ESI negative	1.289 (0.412)	4.008 (3.957)	1.852 (0.604)	0.0002	0.0164
3-dehydrocholate	Lipid	Secondary Bile Acid Metabolism	ESI negative	0.117 (0.062)	1.111 (1.110)	3.896 (2.687)	0.0007	0.0164
N-alpha-acetylornithine	Amino Acid	Urea cycle; Arginine and Proline Metabolism	ESI positive	0.129 (0.043)	1.137 (0.624)	0.548 (0.197)	< 0.0001	0.0164
dehydrolithocholate	Lipid	Secondary Bile Acid Metabolism	ESI negative	0.421 (0.110)	0.105 (0.084)	0.021 (0.000)	< 0.0001	0.0167
dipicolinate	Xenobiotics	Food Component/Plant	ESI positive	0.011 (0.014)	0.016 (0.013)	0.063 (0.061)	0.3152	0.0181
7-ketodeoxycholate	Lipid	Secondary Bile Acid Metabolism	ESI negative	3.673 (1.749)	4.225 (2.445)	11.211 (6.013)	0.5895	0.0214
lignoceroyl sphingomyelin (d18:1/24:0)	Lipid	Sphingomyelins	ESI positive	0.264 (0.473)	2.369 (1.783)	1.209 (0.595)	0.0008	0.0229
I-urobilinogen	Cofactors and Vitamins	Hemoglobin and Porphyrin Metabolism	ESI negative	1.769 (0.649)	0.853 (0.444)	1.493 (0.568)	0.003	0.0239
gamma-glutamylvaline	Peptide	Gamma-glutamyl Amino Acid	ESI positive	0.982 (0.719)	7.172 (4.932)	2.569 (1.613)	0.0008	0.0252
(R)-3-hydroxybutyrylcarnitine	Lipid	Fatty Acid Metabolism (Acyl Carnitine, Hydroxy)	ESI positive	0.370 (0.349)	1.452 (0.662)	0.775 (0.299)	0.0046	0.0254
chenodeoxycholate	Lipid	Primary Bile Acid Metabolism	ESI negative	0.087 (0.000)	0.145 (0.070)	0.552 (0.450)	0.0378	0.0259
sphingomyelin (d18:1/17:0, d17:1/18:0, d19:1/16:0)	Lipid	Sphingomyelins	ESI positive	0.335 (0.186)	1.866 (1.555)	0.736 (0.411)	0.0005	0.0261
beta-alanine	Nucleotide	Pyrimidine Metabolism, Uracil containing	ESI positive	0.438 (0.198)	0.837 (0.865)	0.276 (0.128)	0.3865	0.0261
leucylglycine	Peptide	Dipeptide	ESI positive	1.379 (0.646)	3.571 (2.102)	5.832 (1.380)	0.0143	0.0278
7-ketolithocholate	Lipid	Secondary Bile Acid Metabolism	ESI negative	0.044 (0.000)	0.121 (0.071)	0.445 (0.301)	0.0119	0.0286
serotonin	Amino Acid	Tryptophan Metabolism	ESI positive	0.984 (1.047)	2.826 (2.487)	5.060 (1.014)	0.1922	0.0323
tryptophylglycine	Peptide	Dipeptide	ESI positive	0.139 (0.018)	0.872 (0.506)	1.449 (0.462)	0.0014	0.0341
glycylisoleucine	Peptide	Dipeptide	ESI positive	1.428 (0.925)	2.906 (1.504)	4.497 (1.096)	0.0232	0.0341
5-aminovalerate	Amino Acid	Lysine Metabolism	ESI positive	0.279 (0.106)	2.567 (1.400)	3.948 (0.814)	0.0012	0.0365
fructosyllysine	Amino Acid	Lysine Metabolism	ESI positive	0.411 (0.343)	1.249 (0.543)	2.157 (1.017)	0.0028	0.0369
leucylglutamine*	Peptide	Dipeptide	ESI positive	1.486 (0.829)	4.239 (2.583)	6.479 (1.021)	0.0129	0.037
sphingomyelin (d18:1/22:1, d18:2/22:0, d16:1/24:1)*	Lipid	Sphingomyelins	ESI positive	0.299 (0.239)	1.438 (0.786)	0.673 (0.476)	0.0008	0.04
eicosanoylsphingosine (d20:1)*	Lipid	Sphingosines	ESI positive	0.990 (0.327)	2.121 (0.671)	1.441 (0.493)	0.0003	0.0416
hydroxyproline	Amino Acid	Urea cycle; Arginine and Proline Metabolism	ESI positive	0.198 (0.111)	0.956 (0.733)	0.438 (0.191)	0.0002	0.0418
S-1-pyrroline-5-carboxylate	Amino Acid	Glutamate Metabolism	ESI positive	1.081 (0.536)	3.059 (1.941)	1.664 (0.516)	0.0003	0.0418
sphingomyelin (d18:2/24:1, d18:1/24:2)*	Lipid	Sphingomyelins	ESI positive	0.156 (0.336)	3.067 (3.042)	1.338 (0.797)	0.0003	0.0418
N-acetyl-1-methylhistidine*	Amino Acid	Histidine Metabolism	ESI positive	0.372 (0.155)	41.180 (50.743)	92.811 (48.784)	0.0004	0.0418
behenoyl sphingomyelin (d18:1/22:0)*	Lipid	Sphingomyelins	ESI positive	0.204 (0.317)	1.667 (1.098)	0.774 (0.395)	0.0006	0.0418
2-hydroxyheptanoate*	Lipid	Fatty Acid, Monohydroxy	LC/MS Polar	0.135 (0.031)	0.615 (0.442)	1.122 (0.586)	0.0014	0.0418
deoxycholate	Lipid	Secondary Bile Acid Metabolism	ESI negative	1.407 (0.484)	0.831 (0.710)	0.176 (0.388)	0.0613	0.0418
galactonate	Carbohydrate	Fructose, Mannose and Galactose Metabolism	LC/MS Polar	0.076 (0.006)	0.704 (1.229)	1.461 (1.044)	0.0354	0.0428
ursodeoxycholate	Lipid	Secondary Bile Acid Metabolism	ESI negative	0.235 (0.319)	1.225 (0.910)	2.478 (1.349)	0.0053	0.0433
spermidine	Amino Acid	Polyamine Metabolism	ESI positive	1.206 (0.995)	4.215 (2.145)	2.057 (1.619)	0.0056	0.0443
arabitol/xylitol	Carbohydrate	Pentose Metabolism	LC/MS Polar	0.175 (0.022)	0.987 (1.820)	4.273 (4.854)	0.2254	0.0467
N-methyl-GABA	Amino Acid	Glutamate Metabolism	ESI positive	0.379 (0.188)	0.235 (0.165)	0.083 (0.044)	0.1018	0.0479
succinate	Energy	TCA Cycle	LC/MS Polar	0.410 (0.362)	5.241 (3.166)	8.092 (1.739)	< 0.0001	0.051
cysteinylglycine	Amino Acid	Glutathione Metabolism	ESI positive	0.074 (0.000)	0.786 (0.617)	1.274 (0.244)	0.0086	0.053
stigmastadienone	Lipid	Sterol	ESI positive	0.760 (0.080)	0.659 (0.083)	0.748 (0.084)	0.0189	0.0531
nicotinamide	Cofactors and Vitamins	Nicotinate and Nicotinamide Metabolism	ESI positive	0.576 (0.155)	0.789 (0.681)	2.946 (2.757)	1	0.0549
glutaminylleucine	Peptide	Dipeptide	ESI positive	1.794 (1.081)	2.613 (1.718)	3.944 (0.601)	0.2436	0.0553
hydroxypalmitoyl sphingomyelin (d18:1/16:0(OH))	Lipid	Sphingomyelins	ESI positive	0.411 (0.342)	1.965 (1.443)	0.889 (0.356)	0.002	0.059
2-stearoyl-GPE (18:0)*	Lipid	Lysophospholipid	ESI negative	1.893 (2.050)	5.082 (3.325)	2.515 (1.358)	0.0142	0.0591
pyridoxal	Cofactors and Vitamins	Vitamin B6 Metabolism	ESI positive	1.503 (0.241)	1.009 (0.437)	0.611 (0.307)	0.009	0.06
phenylacetylglutamine	Peptide	Acetylated Peptides	ESI positive	0.144 (0.000)	0.566 (0.793)	1.251 (0.931)	0.1494	0.0603
isobutyrylglycine (C4)	Amino Acid	Leucine, Isoleucine and Valine Metabolism	ESI negative	0.510 (0.126)	0.699 (0.319)	0.468 (0.000)	0.1177	0.0617
6-oxolithocholate	Lipid	Secondary Bile Acid Metabolism	ESI negative	0.041 (0.013)	0.006 (0.005)	0.001 (0.002)	< 0.0001	0.0621
O-sulfo-L-tyrosine	Xenobiotics	Chemical	ESI negative	0.112 (0.000)	0.764 (0.455)	1.388 (0.778)	0.0026	0.0637
maltotriose	Carbohydrate	Glycogen Metabolism	LC/MS Polar	0.500 (0.298)	0.184 (0.301)	0.553 (0.314)	0.0165	0.0678
stachydrine	Xenobiotics	Food Component/Plant	ESI positive	0.072 (0.028)	0.033 (0.050)	0.003 (0.001)	0.0331	0.0681
12-dehydrocholate	Lipid	Secondary Bile Acid Metabolism	ESI negative	1.881 (0.511)	0.851 (0.451)	2.936 (2.502)	0.0003	0.0702
ceramide (d18:1/14:0, d16:1/16:0)*	Lipid	Ceramides	ESI positive	0.494 (0.277)	1.568 (1.048)	0.818 (0.319)	0.0154	0.0703
sphingomyelin (d18:1/14:0, d16:1/16:0)*	Lipid	Sphingomyelins	ESI positive	0.280 (0.153)	1.846 (0.953)	1.015 (0.670)	0.0003	0.0706
dimethylarginine (ADMA + SDMA)	Amino Acid	Urea cycle; Arginine and Proline Metabolism	ESI positive	0.362 (0.242)	2.536 (2.282)	0.959 (0.381)	0.0002	0.0712
glutamate	Amino Acid	Glutamate Metabolism	ESI positive	0.688 (0.261)	1.458 (0.376)	1.899 (0.593)	0.0012	0.0712
sphingomyelin (d18:1/20:0, d16:1/22:0)*	Lipid	Sphingomyelins	ESI positive	0.626 (1.369)	2.576 (1.769)	1.157 (0.623)	0.003	0.0712
isocaproate (i6:0)	Lipid	Fatty Acid, Branched	ESI negative	0.042 (0.000)	1.843 (1.707)	4.444 (3.240)	0.0133	0.0712
CMP	Nucleotide	Pyrimidine Metabolism, Cytidine containing	ESI positive	1.924 (1.559)	0.558 (0.573)	0.209 (0.086)	0.0188	0.0712
octadecenedioate (C18:1-DC)*	Lipid	Fatty Acid, Dicarboxylate	ESI negative	0.551 (0.178)	0.864 (0.433)	0.532 (0.296)	0.2508	0.0712
9,10-DiHOME	Lipid	Fatty Acid, Dihydroxy	ESI negative	0.167 (0.099)	0.165 (0.071)	0.119 (0.079)	0.954	0.0712
palmitoyl dihydrosphingomyelin (d18:0/16:0)*	Lipid	Dihydrosphingomyelins	ESI positive	0.512 (0.251)	3.752 (2.539)	2.215 (0.803)	< 0.0001	0.0712
palmitoyl sphingomyelin (d18:1/16:0)	Lipid	Sphingomyelins	ESI positive	0.835 (0.807)	6.813 (5.517)	3.366 (1.335)	< 0.0001	0.0712
N-stearoyl-sphingosine (d18:1/18:0)*	Lipid	Ceramides	ESI positive	0.404 (0.294)	1.146 (0.745)	0.623 (0.160)	0.0106	0.0714
hippurate	Xenobiotics	Benzoate Metabolism	ESI negative	0.736 (0.000)	0.757 (0.064)	0.897 (0.241)	0.3466	0.0716
N-acetyl-beta-glucosaminylamine	Carbohydrate	Aminosugar Metabolism	ESI negative	0.567 (0.288)	1.163 (0.602)	1.635 (0.264)	0.0164	0.0748
1-methylnicotinamide	Cofactors and Vitamins	Nicotinate and Nicotinamide Metabolism	ESI positive	0.012 (0.000)	0.890 (0.688)	1.769 (1.141)	0.005	0.0758
N-palmitoyl-phytosphingosine (t18:0/16:0)	Lipid	Ceramides	ESI positive	0.738 (0.246)	0.765 (0.323)	0.485 (0.239)	0.8432	0.0758
stearoyl sphingomyelin (d18:1/18:0)	Lipid	Sphingomyelins	ESI positive	0.792 (1.676)	2.554 (2.300)	0.984 (0.379)	0.004	0.0766
5-(2-Hydroxyethyl)-4-methylthiazole	Cofactors and Vitamins	Thiamine Metabolism	ESI positive	0.385 (0.251)	1.389 (1.821)	0.345 (0.141)	0.0731	0.0771
arachidonoylcarnitine (C20:4)	Lipid	Fatty Acid Metabolism (Acyl Carnitine, Polyunsaturated)	ESI positive	0.246 (0.171)	2.274 (1.870)	0.942 (0.766)	0.0008	0.0784
syringic acid	Xenobiotics	Food Component/Plant	ESI negative	0.127 (0.000)	0.151 (0.060)	0.190 (0.049)	0.254	0.0802
N-palmitoyl-sphingosine (d18:1/16:0)	Lipid	Ceramides	ESI positive	0.357 (0.260)	1.993 (1.522)	0.968 (0.267)	0.0005	0.0804
propionylcarnitine (C3)	Lipid	Fatty Acid Metabolism (also BCAA Metabolism)	ESI positive	0.519 (0.575)	4.802 (4.425)	1.850 (0.792)	0.0003	0.0827
gamma-glutamylglutamate	Peptide	Gamma-glutamyl Amino Acid	ESI positive	0.126 (0.105)	1.360 (1.427)	3.324 (2.779)	0.0064	0.0867
N-acetylglucosaminylasparagine	Carbohydrate	Aminosugar Metabolism	ESI positive	0.110 (0.000)	1.673 (1.210)	2.916 (1.523)	0.0047	0.0898
N-glycolylneuraminate	Carbohydrate	Aminosugar Metabolism	ESI positive	0.156 (0.200)	2.859 (2.925)	1.272 (0.649)	0.0004	0.0907
1-stearoyl-GPE (18:0)	Lipid	Lysophospholipid	ESI positive	1.539 (1.329)	7.066 (5.404)	3.652 (1.594)	0.0008	0.0907
4-hydroxyphenylacetate	Amino Acid	Phenylalanine Metabolism	ESI negative	0.327 (0.200)	3.559 (1.995)	2.357 (2.046)	0.0012	0.0907
stearoylcarnitine (C18)	Lipid	Fatty Acid Metabolism (Acyl Carnitine, Long Chain Saturated)	ESI positive	0.346 (0.173)	1.633 (0.857)	1.066 (0.437)	0.0018	0.0907
fructose	Carbohydrate	Fructose, Mannose and Galactose Metabolism	LC/MS Polar	0.898 (0.800)	1.557 (1.022)	0.992 (0.360)	0.0315	0.0907
1-(1-enyl-palmitoyl)-2-palmitoyl-GPC (P-16:0/16:0)*	Lipid	Plasmalogen	ESI positive	0.233 (0.000)	3.087 (3.358)	0.776 (0.439)	0.0342	0.0907
indoleacetate	Amino Acid	Tryptophan Metabolism	ESI negative	0.058 (0.019)	0.357 (0.238)	0.899 (0.800)	< 0.0001	0.0907
ribitol	Carbohydrate	Pentose Metabolism	LC/MS Polar	0.266 (0.052)	2.467 (4.308)	5.325 (4.629)	0.5286	0.0921
N-(2-hydroxypalmitoyl)-sphingosine (d18:1/16:0(2OH))	Lipid	Ceramides	ESI positive	0.312 (0.074)	0.612 (0.358)	0.348 (0.166)	0.0364	0.0933
ribulonate/xylulonate/lyxonate*	Carbohydrate	Pentose Metabolism	LC/MS Polar	0.241 (0.146)	1.915 (1.273)	3.539 (2.305)	0.0042	0.0934
glycylleucine	Peptide	Dipeptide	ESI positive	1.642 (0.788)	4.515 (2.106)	6.187 (1.459)	0.0032	0.0956
gamma-glutamylthreonine	Peptide	Gamma-glutamyl Amino Acid	ESI positive	0.513 (0.324)	3.563 (2.537)	1.910 (0.808)	0.0068	0.0958
1-linoleoyl-2-arachidonoyl-GPC (18:2/20:4n6)*	Lipid	Phosphatidylcholine (PC)	ESI positive	1.040 (1.148)	4.597 (6.941)	0.558 (0.388)	0.2609	0.0974
gamma-glutamylphenylalanine	Peptide	Gamma-glutamyl Amino Acid	ESI positive	0.399 (0.312)	5.527 (3.280)	3.363 (1.297)	0.0004	0.0985
N-margaroyl-sphingosine (d18:1/17:0)*	Lipid	Ceramides	ESI positive	0.250 (0.102)	0.692 (0.550)	0.348 (0.082)	0.0433	0.0995
dodecanedioate (C12)	Lipid	Fatty Acid, Dicarboxylate	ESI negative	0.090 (0.030)	0.031 (0.018)	0.022 (0.014)	0.0014	0.1025
nicotinate ribonucleoside	Cofactors and Vitamins	Nicotinate and Nicotinamide Metabolism	ESI positive	0.322 (0.294)	0.143 (0.117)	0.377 (0.318)	0.119	0.1042
glucuronate	Carbohydrate	Aminosugar Metabolism	LC/MS Polar	0.252 (0.063)	1.009 (0.375)	0.690 (0.351)	0.0003	0.1043
taurocholate	Lipid	Primary Bile Acid Metabolism	ESI negative	0.715 (0.698)	1.000 (0.258)	4.258 (4.509)	0.2757	0.1046
formiminoglutamate	Amino Acid	Histidine Metabolism	ESI positive	0.340 (0.091)	2.551 (1.176)	3.657 (1.409)	0.0005	0.1085
desmosterol	Lipid	Sterol	ESI positive	0.774 (0.365)	2.190 (1.363)	1.242 (0.607)	0.0144	0.1106
cholesterol	Lipid	Sterol	ESI positive	0.691 (0.181)	2.463 (1.129)	1.668 (0.552)	0.0014	0.1109
tauro-alpha-muricholate	Lipid	Primary Bile Acid Metabolism	ESI negative	0.011 (0.000)	0.588 (0.933)	1.420 (1.208)	0.1004	0.1113
4-hydroxycinnamate	Xenobiotics	Food Component/Plant	LC/MS Polar	0.025 (0.012)	0.216 (0.160)	0.270 (0.060)	0.0002	0.1142
dehydrophytosphingosine*	Lipid	Sphingosines	ESI positive	0.029 (0.010)	0.246 (0.125)	0.441 (0.337)	0.0005	0.1142
sphingomyelin (d18:1/24:1, d18:2/24:0)*	Lipid	Sphingomyelins	ESI positive	0.771 (1.778)	8.982 (7.159)	4.418 (2.357)	0.0013	0.1142
3-ureidoisobutyrate	Nucleotide	Pyrimidine Metabolism, Uracil containing	ESI positive	0.381 (0.206)	2.842 (2.064)	1.530 (0.747)	0.0072	0.1142
hydroxymethylpyrimidine	Cofactors and Vitamins	Thiamine Metabolism	ESI positive	0.975 (0.156)	1.091 (1.339)	0.245 (0.212)	0.2581	0.1142
valerate (5:0)	Lipid	Short Chain Fatty Acid	ESI negative	0.333 (0.151)	0.398 (0.413)	0.080 (0.049)	0.6048	0.1142
hypotaurine	Amino Acid	Methionine, Cysteine, SAM and Taurine Metabolism	ESI positive	1.522 (1.429)	7.452 (5.665)	3.885 (2.316)	0.0008	0.1143
docosapentaenoate (DPA; 22:5n3)	Lipid	Long Chain Polyunsaturated Fatty Acid (n3 and n6)	ESI negative	1.536 (1.853)	2.486 (1.732)	1.256 (0.980)	0.2224	0.1162
5-hydroxyindoleacetate	Amino Acid	Tryptophan Metabolism	ESI positive	1.748 (0.501)	1.571 (0.616)	1.109 (0.444)	0.4363	0.1169
malate	Energy	TCA Cycle	ESI negative	0.157 (0.062)	0.582 (0.374)	0.353 (0.148)	0.0092	0.1215
xanthine	Nucleotide	Purine Metabolism, (Hypo)Xanthine/Inosine containing	ESI negative	1.214 (0.240)	0.997 (0.631)	0.619 (0.205)	0.3571	0.1227
N-palmitoyl-heptadecasphingosine (d17:1/16:0)*	Lipid	Ceramides	ESI positive	0.500 (0.228)	1.289 (0.787)	0.763 (0.344)	0.0172	0.1232
3-hydroxyisobutyrate	Amino Acid	Leucine, Isoleucine and Valine Metabolism	LC/MS Polar	0.419 (0.089)	1.507 (1.056)	2.415 (1.162)	0.0013	0.1244
pimeloylcarnitine/3-methyladipoylcarnitine (C7-DC)	Lipid	Fatty Acid Metabolism (Acyl Carnitine, Dicarboxylate)	ESI positive	0.097 (0.000)	0.699 (0.521)	1.088 (0.422)	0.0085	0.1313
(S)-3-hydroxybutyrylcarnitine	Lipid	Fatty Acid Metabolism (Acyl Carnitine, Hydroxy)	ESI positive	1.394 (1.264)	4.588 (3.415)	2.635 (0.848)	0.0008	0.1321
4-imidazoleacetate	Amino Acid	Histidine Metabolism	ESI positive	0.352 (0.073)	1.179 (0.455)	2.016 (1.245)	0.0006	0.133
hexanoyltaurine	Lipid	Endocannabinoid	LC/MS Polar	0.154 (0.000)	0.738 (0.808)	1.445 (1.318)	0.0617	0.1355
1-linoleoyl-GPE (18:2)*	Lipid	Lysophospholipid	ESI positive	0.180 (0.055)	0.852 (0.771)	0.406 (0.175)	0.0036	0.1372
undecanedioate (C11-DC)	Lipid	Fatty Acid, Dicarboxylate	ESI negative	0.174 (0.081)	0.132 (0.030)	0.133 (0.098)	0.3865	0.1381
kynurenine	Amino Acid	Tryptophan Metabolism	ESI positive	0.662 (0.396)	5.272 (5.903)	2.115 (0.417)	0.0004	0.1416
3-amino-2-piperidone	Amino Acid	Urea cycle; Arginine and Proline Metabolism	ESI positive	0.236 (0.202)	1.002 (0.644)	1.242 (0.379)	0.0018	0.1416
3-phenylpropionate (hydrocinnamate)	Xenobiotics	Benzoate Metabolism	ESI negative	0.014 (0.008)	0.126 (0.140)	0.321 (0.307)	0.0054	0.1416
mannonate*	Xenobiotics	Food Component/Plant	LC/MS Polar	0.130 (0.000)	0.342 (0.277)	0.744 (0.822)	0.0506	0.1416
myo-inositol	Lipid	Inositol Metabolism	LC/MS Polar	3.221 (2.554)	3.711 (3.090)	1.961 (1.328)	0.8633	0.1416
lactosyl-N-palmitoyl-sphingosine (d18:1/16:0)	Lipid	Lactosylceramides (LCER)	ESI positive	0.530 (0.113)	3.458 (1.874)	2.535 (1.075)	< 0.0001	0.1416
alpha-muricholate	Lipid	Primary Bile Acid Metabolism	ESI negative	5.529 (1.293)	6.163 (2.251)	8.312 (3.302)	0.4741	0.1434
lignoceroylcarnitine (C24)*	Lipid	Fatty Acid Metabolism (Acyl Carnitine, Long Chain Saturated)	ESI positive	0.593 (0.162)	1.248 (0.402)	0.955 (0.337)	0.0009	0.1437
oleamide	Lipid	Fatty Acid, Amide	ESI positive	1.096 (0.793)	1.342 (0.640)	0.935 (0.296)	0.3865	0.1443
butyrylglycine (C4)	Lipid	Fatty Acid Metabolism (also BCAA Metabolism)	ESI negative	0.372 (0.000)	0.690 (0.350)	0.459 (0.231)	0.0259	0.1444
sphingomyelin (d18:2/16:0, d18:1/16:1)*	Lipid	Sphingomyelins	ESI positive	0.475 (0.150)	1.655 (1.151)	0.928 (0.519)	0.0019	0.1449
3-(3-hydroxyphenyl)propionate	Xenobiotics	Benzoate Metabolism	ESI negative	0.051 (0.026)	0.081 (0.110)	0.023 (0.000)	0.8898	0.1489
dihomolinolenate (20:3n3 or 3n6)	Lipid	Long Chain Polyunsaturated Fatty Acid (n3 and n6)	ESI negative	3.326 (3.176)	8.445 (6.734)	4.241 (3.049)	0.0627	0.1494
1-arachidonylglycerol (20:4)	Lipid	Monoacylglycerol	ESI negative	0.562 (0.743)	2.185 (2.411)	0.741 (0.786)	0.0276	0.15
arachidonate (20:4n6)	Lipid	Long Chain Polyunsaturated Fatty Acid (n3 and n6)	ESI negative	1.822 (1.647)	7.067 (5.939)	3.380 (2.637)	0.0106	0.1506
N-acetyltyrosine	Amino Acid	Tyrosine Metabolism	ESI negative	0.098 (0.044)	1.178 (0.482)	1.643 (0.741)	0.0003	0.1507
dihydroferulic acid sulfate	Xenobiotics	Food Component/Plant	ESI negative	0.145 (0.000)	0.468 (0.473)	0.859 (0.589)	0.0752	0.1509
2-palmitoyl-GPC* (16:0)*	Lipid	Lysophospholipid	ESI negative	0.491 (0.552)	1.990 (1.601)	1.098 (1.360)	0.0048	0.1527
behenoyl dihydrosphingomyelin (d18:0/22:0)*	Lipid	Dihydrosphingomyelins	ESI positive	0.221 (0.000)	1.489 (1.280)	0.713 (0.570)	0.0178	0.1527
palmitoylcarnitine (C16)	Lipid	Fatty Acid Metabolism (Acyl Carnitine, Long Chain Saturated)	ESI positive	2.446 (1.421)	13.124 (7.719)	8.310 (3.807)	0.0031	0.1544
dodecenedioate (C12:1-DC)*	Lipid	Fatty Acid, Dicarboxylate	ESI negative	0.330 (0.193)	0.363 (0.170)	0.240 (0.008)	0.4942	0.1569
N6-carboxymethyllysine	Carbohydrate	Advanced Glycation End-product	ESI positive	0.597 (0.239)	1.588 (0.646)	1.187 (0.322)	0.0015	0.157
tricosanoyl sphingomyelin (d18:1/23:0)*	Lipid	Sphingomyelins	ESI positive	0.348 (0.210)	1.786 (1.014)	1.123 (0.674)	0.0009	0.1589
maltotetraose	Carbohydrate	Glycogen Metabolism	ESI negative	0.411 (0.233)	1.164 (0.944)	1.795 (0.685)	0.0453	0.1595
N-monomethylarginine	Amino Acid	Urea cycle; Arginine and Proline Metabolism	ESI positive	0.323 (0.120)	2.580 (2.135)	1.408 (0.851)	0.0013	0.1619
dihomo-linoleoylcarnitine (C20:2)*	Lipid	Fatty Acid Metabolism (Acyl Carnitine, Polyunsaturated)	ESI positive	0.482 (0.114)	1.501 (0.917)	0.938 (0.465)	0.001	0.1624
phenylacetylglycine	Peptide	Acetylated Peptides	ESI negative	0.385 (0.231)	1.041 (0.673)	0.559 (0.307)	0.0089	0.1625
pipecolate	Amino Acid	Lysine Metabolism	ESI positive	0.187 (0.086)	0.133 (0.188)	0.037 (0.000)	0.0689	0.165
glucose	Carbohydrate	Glycolysis, Gluconeogenesis, and Pyruvate Metabolism	LC/MS Polar	0.446 (0.162)	0.963 (0.243)	1.118 (0.157)	< 0.0001	0.1651
N-formylmethionine	Amino Acid	Methionine, Cysteine, SAM and Taurine Metabolism	ESI negative	0.626 (0.384)	5.059 (2.401)	7.061 (3.085)	0.0002	0.1654
behenoyl ethanolamide (22:0)*	Lipid	Endocannabinoid	ESI positive	0.147 (0.053)	0.283 (0.115)	0.206 (0.088)	0.008	0.1666
glycosyl-N-palmitoyl-sphingosine (d18:1/16:0)	Lipid	Hexosylceramides (HCER)	ESI positive	0.120 (0.000)	1.881 (1.304)	1.096 (0.675)	0.0037	0.1714
N-tetracosadienoyl-sphingosine (d18:1/24:2)*	Lipid	Ceramides	ESI positive	0.202 (0.424)	2.549 (2.821)	0.806 (0.399)	0.0012	0.1738
1-methyl-5-imidazoleacetate	Amino Acid	Histidine Metabolism	ESI positive	1.813 (0.428)	0.567 (0.674)	0.120 (0.063)	0.0019	0.1738
ceramide (d18:1/20:0, d16:1/22:0, d20:1/18:0)*	Lipid	Ceramides	ESI positive	0.583 (0.334)	1.534 (1.027)	0.834 (0.201)	0.0078	0.1738
hexadecanedioate (C16)	Lipid	Fatty Acid, Dicarboxylate	ESI negative	0.790 (0.622)	1.519 (0.785)	1.037 (0.649)	0.0104	0.1738
tyramine	Amino Acid	Tyrosine Metabolism	ESI positive	0.067 (0.049)	0.901 (1.878)	1.481 (1.393)	0.2694	0.1738
arabonate/xylonate	Carbohydrate	Pentose Metabolism	LC/MS Polar	0.194 (0.074)	2.631 (2.613)	4.288 (1.627)	< 0.0001	0.1738
4-methylcatechol sulfate	Xenobiotics	Benzoate Metabolism	ESI negative	0.155 (0.000)	0.535 (0.601)	1.091 (0.770)	0.0946	0.1749
taurocholenate sulfate*	Lipid	Secondary Bile Acid Metabolism	ESI negative	0.035 (0.000)	0.690 (0.595)	1.207 (0.861)	0.0108	0.1768
daidzein	Xenobiotics	Food Component/Plant	ESI negative	0.013 (0.003)	0.015 (0.007)	0.011 (0.000)	0.636	0.1769
N-acetylglutamate	Amino Acid	Glutamate Metabolism	ESI positive	0.386 (0.128)	0.782 (0.130)	1.062 (0.478)	< 0.0001	0.1784
5'- GMP	Nucleotide	Purine Metabolism, Guanine containing	ESI positive	0.431 (0.616)	0.036 (0.016)	0.028 (0.000)	0.0109	0.1786
tetradecanedioate (C14)	Lipid	Fatty Acid, Dicarboxylate	ESI negative	0.637 (0.173)	0.748 (0.304)	0.580 (0.243)	0.5793	0.1809
sphinganine	Lipid	Sphingolipid Synthesis	ESI positive	1.035 (0.287)	0.530 (0.256)	0.380 (0.132)	0.0012	0.1816
isoleucylglycine	Peptide	Dipeptide	ESI negative	1.422 (0.764)	3.081 (1.352)	4.062 (1.442)	0.0055	0.1833
margaroylcarnitine (C17)*	Lipid	Fatty Acid Metabolism (Acyl Carnitine, Long Chain Saturated)	ESI positive	0.741 (0.339)	1.542 (0.646)	1.169 (0.323)	0.0046	0.186
isobutyrylcarnitine (C4)	Amino Acid	Leucine, Isoleucine and Valine Metabolism	ESI positive	0.453 (0.315)	3.147 (2.910)	1.488 (1.381)	0.007	0.1879
2-hydroxyadipate	Lipid	Fatty Acid, Dicarboxylate	LC/MS Polar	0.171 (0.000)	0.324 (0.240)	0.576 (0.329)	0.0907	0.1922
palmitoyl-linoleoyl-glycerol (16:0/18:2) [2]*	Lipid	Diacylglycerol	ESI positive	0.162 (0.228)	0.059 (0.114)	0.083 (0.200)	0.7159	0.1935
oleoyl-oleoyl-glycerol (18:1/18:1) [2]*	Lipid	Diacylglycerol	ESI positive	0.327 (0.408)	0.183 (0.312)	0.237 (0.522)	0.7212	0.1935
gluconate	Xenobiotics	Food Component/Plant	LC/MS Polar	0.085 (0.048)	0.253 (0.467)	0.100 (0.104)	0.25	0.1973
levulinate (4-oxovalerate)	Xenobiotics	Food Component/Plant	ESI positive	0.576 (0.443)	0.613 (0.399)	0.405 (0.252)	0.7059	0.1995
gamma-CEHC sulfate	Cofactors and Vitamins	Tocopherol Metabolism	ESI negative	0.035 (0.000)	0.726 (0.958)	0.937 (0.634)	0.0625	0.2007
valylglycine	Peptide	Dipeptide	ESI positive	0.710 (0.384)	1.678 (0.797)	2.192 (0.720)	0.0047	0.2041
carotene diol (3)	Cofactors and Vitamins	Vitamin A Metabolism	ESI positive	0.031 (0.007)	0.027 (0.009)	0.032 (0.006)	0.3602	0.2071
N-acetylglucosamine 6-sulfate	Carbohydrate	Aminosugar Metabolism	LC/MS Polar	0.263 (0.108)	2.322 (2.034)	4.256 (3.762)	0.0161	0.2075
indole-3-carboxylate	Amino Acid	Tryptophan Metabolism	ESI negative	0.033 (0.008)	0.057 (0.029)	0.041 (0.015)	0.0582	0.2077
4-hydroxyphenylacetate sulfate	Amino Acid	Tyrosine Metabolism	ESI negative	0.007 (0.002)	2.043 (3.027)	3.940 (3.090)	0.0002	0.2105
1-palmitoyl-GPI* (16:0)	Lipid	Lysophospholipid	ESI negative	0.173 (0.144)	1.982 (1.685)	1.220 (1.033)	0.0005	0.2105
eicosenoylcarnitine (C20:1)*	Lipid	Fatty Acid Metabolism (Acyl Carnitine, Monounsaturated)	ESI positive	0.383 (0.349)	1.602 (0.905)	1.108 (0.592)	0.0015	0.2105
oleoylcarnitine (C18)	Lipid	Fatty Acid Metabolism (Acyl Carnitine, Monounsaturated)	ESI positive	0.277 (0.181)	1.727 (1.012)	1.259 (0.847)	0.0025	0.2105
tauroursodeoxycholate	Lipid	Secondary Bile Acid Metabolism	ESI negative	0.147 (0.066)	1.163 (1.315)	5.094 (6.997)	0.0027	0.2105
5-oxoproline	Amino Acid	Glutathione Metabolism	ESI negative	0.665 (0.371)	1.614 (1.042)	5.207 (4.302)	0.0056	0.2105
N-formylanthranilic acid	Amino Acid	Tryptophan Metabolism	LC/MS Polar	0.637 (0.404)	1.199 (0.674)	0.961 (0.575)	0.0056	0.2105
1-palmitoyl-GPC (16:0)	Lipid	Lysophospholipid	ESI negative	1.007 (1.243)	4.081 (3.097)	2.464 (2.398)	0.0078	0.2105
thioproline	Xenobiotics	Chemical	ESI positive	1.156 (0.613)	2.520 (1.476)	1.666 (0.697)	0.0106	0.2105
10-heptadecenoate (17:1n7)	Lipid	Long Chain Monounsaturated Fatty Acid	ESI negative	3.378 (3.343)	1.041 (0.736)	0.694 (0.749)	0.0188	0.2105
1-palmitoyl-2-docosahexaenoyl-GPC (16:0/22:6)	Lipid	Phosphatidylcholine (PC)	ESI positive	1.215 (1.583)	6.471 (7.527)	1.618 (1.231)	0.077	0.2105
1-stearoyl-2-arachidonoyl-GPC (18:0/20:4)	Lipid	Phosphatidylcholine (PC)	ESI positive	3.085 (3.677)	13.078 (17.199)	2.940 (1.940)	0.1615	0.2105
1-palmitoyl-2-arachidonoyl-GPC (16:0/20:4n6)	Lipid	Phosphatidylcholine (PC)	ESI positive	3.126 (3.355)	11.976 (15.698)	2.647 (1.520)	0.2973	0.2105
palmitoleate (16:1n7)	Lipid	Long Chain Monounsaturated Fatty Acid	ESI negative	12.928 (21.826)	5.043 (6.323)	4.230 (9.343)	0.3865	0.2105
N-acetylarginine	Amino Acid	Urea cycle; Arginine and Proline Metabolism	ESI positive	0.634 (0.260)	0.730 (0.318)	0.970 (0.436)	0.5457	0.2105
1-stearoyl-GPI (18:0)	Lipid	Lysophospholipid	ESI negative	0.703 (0.808)	7.576 (4.955)	5.535 (4.441)	< 0.0001	0.2105
N2,N6-diacetyllysine	Amino Acid	Lysine Metabolism	LC/MS Polar	0.257 (0.143)	1.658 (1.375)	2.670 (1.720)	0.0194	0.211
hyocholate	Lipid	Secondary Bile Acid Metabolism	ESI negative	0.718 (0.147)	0.439 (0.175)	0.572 (0.231)	0.0022	0.2111
alpha-hydroxyisovalerate	Amino Acid	Leucine, Isoleucine and Valine Metabolism	LC/MS Polar	0.173 (0.061)	2.407 (1.167)	3.161 (1.126)	0.0001	0.2139
alpha-hydroxyisocaproate	Amino Acid	Leucine, Isoleucine and Valine Metabolism	ESI negative	0.096 (0.062)	4.072 (2.881)	5.629 (1.463)	0.0032	0.2149
N6-succinyladenosine	Nucleotide	Purine Metabolism, Adenine containing	ESI negative	0.462 (0.014)	1.272 (1.813)	0.458 (0.000)	0.0937	0.2149
docosahexaenoate (DHA; 22:6n3)	Lipid	Long Chain Polyunsaturated Fatty Acid (n3 and n6)	ESI negative	1.963 (2.388)	8.516 (6.735)	4.827 (3.759)	0.0078	0.2164
valylleucine	Peptide	Dipeptide	ESI positive	0.983 (0.416)	3.230 (2.657)	4.787 (2.019)	0.0352	0.2195
1,2-dilinoleoyl-GPE (18:2/18:2)*	Lipid	Phosphatidylethanolamine (PE)	ESI positive	0.302 (0.000)	0.606 (0.692)	0.302 (0.000)	0.2245	0.2245
dodecadienoate (12:2)*	Lipid	Fatty Acid, Dicarboxylate	ESI negative	0.234 (0.276)	1.397 (1.073)	0.828 (0.569)	0.0036	0.2259
genistein	Xenobiotics	Food Component/Plant	ESI negative	0.016 (0.000)	0.019 (0.008)	0.016 (0.000)	0.2261	0.2261
gamma-tocopherol/beta-tocopherol	Cofactors and Vitamins	Tocopherol Metabolism	ESI positive	1.075 (0.173)	1.431 (0.355)	1.634 (0.266)	0.0158	0.2285
N-acetylvaline	Amino Acid	Leucine, Isoleucine and Valine Metabolism	ESI negative	0.125 (0.000)	2.599 (1.175)	3.286 (0.974)	0.0002	0.2331
AMP	Nucleotide	Purine Metabolism, Adenine containing	ESI positive	0.294 (0.353)	0.021 (0.023)	0.012 (0.013)	0.0046	0.2352
N1-Methyl-4-pyridone-3-carboxamide	Cofactors and Vitamins	Nicotinate and Nicotinamide Metabolism	ESI positive	0.171 (0.127)	1.289 (0.635)	1.619 (0.343)	0.0007	0.2355
octadecanedioylcarnitine (C18-DC)*	Lipid	Fatty Acid Metabolism (Acyl Carnitine, Dicarboxylate)	ESI positive	0.407 (0.000)	1.259 (0.703)	0.948 (0.195)	0.0066	0.2356
creatine	Amino Acid	Creatine Metabolism	ESI positive	1.369 (0.455)	1.420 (0.654)	1.091 (0.290)	0.8491	0.2376
sphingomyelin (d17:1/16:0, d18:1/15:0, d16:1/17:0)*	Lipid	Sphingomyelins	ESI positive	0.426 (0.315)	2.952 (1.393)	2.013 (1.656)	0.0008	0.2381
sphingomyelin (d18:1/21:0, d17:1/22:0, d16:1/23:0)*	Lipid	Sphingomyelins	ESI positive	0.123 (0.000)	1.269 (1.188)	0.666 (0.596)	0.0201	0.2422
glyco-beta-muricholate	Lipid	Primary Bile Acid Metabolism	ESI negative	0.527 (0.311)	2.175 (2.621)	3.242 (2.297)	0.0401	0.2429
glycylvaline	Peptide	Dipeptide	ESI positive	1.497 (0.682)	3.935 (2.048)	4.859 (0.824)	0.0072	0.2439
quinate	Xenobiotics	Food Component/Plant	LC/MS Polar	0.176 (0.060)	1.183 (1.273)	2.216 (1.398)	0.0759	0.2439
valylglutamine	Peptide	Dipeptide	ESI positive	2.396 (1.071)	4.415 (3.029)	5.969 (1.703)	0.0889	0.246
arachidoyl ethanolamide (20:0)*	Lipid	Endocannabinoid	ESI positive	0.316 (0.064)	0.428 (0.153)	0.338 (0.141)	0.0679	0.2466
deoxycarnitine	Lipid	Carnitine Metabolism	ESI positive	1.719 (0.552)	0.730 (0.476)	0.471 (0.348)	0.0009	0.247
N-acetylmethionine sulfoxide	Amino Acid	Methionine, Cysteine, SAM and Taurine Metabolism	ESI positive	0.272 (0.076)	1.797 (1.028)	1.281 (0.512)	0.0021	0.2471
1-stearoyl-GPC (18:0)	Lipid	Lysophospholipid	ESI positive	1.385 (1.247)	9.368 (5.990)	6.530 (4.140)	0.0002	0.2523
3-(4-hydroxyphenyl)lactate (HPLA)	Amino Acid	Tyrosine Metabolism	ESI negative	0.116 (0.067)	5.000 (4.852)	6.988 (4.285)	0.0004	0.2523
diaminopimelate	Xenobiotics	Food Component/Plant	ESI positive	0.141 (0.083)	0.706 (0.268)	0.852 (1.168)	0.0004	0.2523
2-hydroxybutyrate/2-hydroxyisobutyrate	Amino Acid	Glutathione Metabolism	LC/MS Polar	0.221 (0.059)	2.444 (1.560)	4.475 (4.132)	0.0027	0.2523
N,N,N-trimethyl-5-aminovalerate	Amino Acid	Lysine Metabolism	ESI positive	1.153 (0.218)	0.494 (0.553)	0.306 (0.487)	0.0244	0.2523
gamma-glutamylhistidine	Peptide	Gamma-glutamyl Amino Acid	ESI positive	0.194 (0.000)	3.089 (3.235)	6.372 (5.796)	0.0277	0.2523
1-stearoyl-2-docosahexaenoyl-GPC (18:0/22:6)	Lipid	Phosphatidylcholine (PC)	ESI positive	1.185 (1.877)	7.305 (9.355)	1.568 (1.291)	0.04	0.2523
1-oleoyl-2-linoleoyl-GPE (18:1/18:2)*	Lipid	Phosphatidylethanolamine (PE)	ESI positive	0.567 (0.448)	2.403 (3.384)	0.781 (0.357)	0.0516	0.2523
xanthurenate	Amino Acid	Tryptophan Metabolism	ESI negative	1.059 (0.736)	4.144 (4.619)	1.392 (0.628)	0.0625	0.2523
1-(1-enyl-palmitoyl)-2-arachidonoyl-GPE (P-16:0/20:4)*	Lipid	Plasmalogen	ESI positive	1.354 (1.756)	7.468 (11.161)	1.464 (0.936)	0.1615	0.2523
N1,N12-diacetylspermine	Amino Acid	Polyamine Metabolism	ESI positive	0.762 (0.448)	2.097 (2.591)	0.837 (0.972)	0.6048	0.2523
UMP	Nucleotide	Pyrimidine Metabolism, Uracil containing	ESI positive	0.240 (0.235)	0.046 (0.052)	0.025 (0.000)	0.0064	0.2534
succinimide	Xenobiotics	Chemical	LC/MS Polar	1.212 (0.268)	1.012 (0.268)	0.820 (0.380)	0.1135	0.2565
octadecanedioate (C18)	Lipid	Fatty Acid, Dicarboxylate	ESI negative	0.938 (0.236)	0.815 (0.406)	0.607 (0.259)	0.4444	0.2578
N-acetylhomocitrulline	Amino Acid	Urea cycle; Arginine and Proline Metabolism	ESI positive	0.210 (0.020)	11.431 (10.248)	17.161 (8.883)	0.0002	0.26
o-Tyrosine	Amino Acid	Tyrosine Metabolism	ESI positive	0.335 (0.127)	1.675 (1.017)	1.240 (0.358)	0.001	0.2604
nicotinate	Cofactors and Vitamins	Nicotinate and Nicotinamide Metabolism	ESI positive	0.888 (0.319)	0.647 (0.175)	0.546 (0.167)	0.0647	0.2607
sphingosine	Lipid	Sphingosines	ESI positive	0.685 (0.133)	1.078 (0.425)	0.849 (0.332)	0.0252	0.2612
3-hydroxy-3-methylglutarate	Lipid	Mevalonate Metabolism	LC/MS Polar	0.047 (0.015)	0.208 (0.243)	0.185 (0.249)	0.0103	0.2628
1-palmitoyl-galactosylglycerol (16:0)*	Lipid	Galactosyl Glycerolipids	ESI negative	0.981 (0.396)	0.451 (0.323)	0.500 (0.717)	0.0192	0.2628
ribulose/xylulose	Carbohydrate	Pentose Metabolism	LC/MS Polar	0.476 (0.195)	0.654 (0.353)	0.508 (0.098)	0.2042	0.2639
prolylglycine	Peptide	Dipeptide	ESI positive	0.061 (0.000)	1.208 (0.841)	1.660 (0.670)	0.0035	0.265
6-hydroxynicotinate	Cofactors and Vitamins	Nicotinate and Nicotinamide Metabolism	LC/MS Polar	1.927 (1.475)	0.883 (0.382)	1.723 (1.911)	0.0697	0.266
2,6-dihydroxybenzoic acid	Xenobiotics	Drug - Topical Agents	LC/MS Polar	0.002 (0.000)	0.003 (0.002)	0.004 (0.003)	0.1283	0.2692
taurochenodeoxycholate	Lipid	Primary Bile Acid Metabolism	ESI negative	0.764 (0.745)	0.497 (0.356)	1.792 (2.197)	0.6441	0.2771
(3'-5')-adenylyluridine	Nucleotide	Dinucleotide	ESI negative	1.924 (1.020)	0.243 (0.176)	0.175 (0.000)	0.0005	0.2818
p-cresol sulfate	Xenobiotics	Benzoate Metabolism	ESI negative	1.667 (1.428)	4.828 (7.235)	10.887 (8.805)	1	0.2826
2-oxoarginine*	Amino Acid	Urea cycle; Arginine and Proline Metabolism	ESI positive	1.939 (1.584)	1.940 (1.157)	1.417 (0.512)	0.8633	0.2867
4-methylthio-2-oxobutanoate	Amino Acid	Methionine, Cysteine, SAM and Taurine Metabolism	ESI negative	0.846 (0.520)	1.510 (0.805)	2.714 (2.666)	0.054	0.2869
sphingomyelin (d18:0/18:0, d19:0/17:0)*	Lipid	Dihydrosphingomyelins	ESI positive	0.462 (0.098)	1.850 (1.965)	0.951 (0.555)	0.0013	0.2884
2S,3R-dihydroxybutyrate	Lipid	Fatty Acid, Dihydroxy	LC/MS Polar	0.684 (0.346)	0.832 (0.311)	0.879 (0.973)	0.3572	0.2884
1,2-dipalmitoyl-GPE (16:0/16:0)*	Lipid	Phosphatidylethanolamine (PE)	ESI positive	0.344 (0.156)	0.318 (0.129)	0.323 (0.336)	0.7079	0.2895
2-hydroxyglutarate	Lipid	Fatty Acid, Dicarboxylate	ESI positive	0.892 (0.781)	1.506 (0.446)	1.847 (0.803)	0.0244	0.2974
ribonate (ribonolactone)	Carbohydrate	Pentose Metabolism	LC/MS Polar	0.849 (0.261)	4.740 (3.442)	6.764 (4.062)	0.0095	0.2986
gamma-glutamyl-alpha-lysine	Peptide	Gamma-glutamyl Amino Acid	ESI positive	0.440 (0.258)	5.378 (2.994)	3.970 (0.799)	0.0001	0.2991
succinylglutamine	Amino Acid	Glutamate Metabolism	ESI positive	0.097 (0.016)	2.345 (3.988)	3.284 (2.465)	0.0002	0.2991
2'-deoxyadenosine	Nucleotide	Purine Metabolism, Adenine containing	ESI positive	12.129 (6.170)	1.836 (2.822)	1.281 (2.639)	0.0005	0.2991
N-acetylglutamine	Amino Acid	Glutamate Metabolism	ESI positive	0.337 (0.049)	2.182 (2.154)	3.332 (2.070)	0.004	0.2991
phosphocholine	Lipid	Phospholipid Metabolism	ESI positive	5.245 (5.097)	8.131 (13.933)	1.205 (1.366)	0.0939	0.2991
1-stearoyl-2-linoleoyl-GPC (18:0/18:2)*	Lipid	Phosphatidylcholine (PC)	ESI positive	1.651 (1.475)	9.725 (15.482)	1.943 (0.946)	0.0939	0.2991
1-palmitoyl-2-oleoyl-GPC (16:0/18:1)	Lipid	Phosphatidylcholine (PC)	ESI positive	1.761 (1.948)	9.185 (12.635)	2.035 (0.921)	0.1135	0.2991
dihomolinoleate (20:2n6)	Lipid	Long Chain Polyunsaturated Fatty Acid (n3 and n6)	ESI negative	1.250 (1.539)	1.913 (1.475)	1.407 (1.633)	0.2224	0.2991
eicosapentaenoate (EPA; 20:5n3)	Lipid	Long Chain Polyunsaturated Fatty Acid (n3 and n6)	ESI negative	2.211 (1.807)	4.370 (3.386)	2.220 (1.525)	0.2224	0.2991
5-methyl-2'-deoxycytidine	Nucleotide	Pyrimidine Metabolism, Cytidine containing	ESI positive	0.972 (0.314)	0.984 (0.668)	0.724 (0.440)	0.6048	0.2991
N-oleoyl-sphingosine (d18:1/18:1)*	Lipid	Ceramides	ESI positive	0.273 (0.110)	0.845 (0.449)	0.625 (0.346)	0.0049	0.3017
docosadienoate (22:2n6)	Lipid	Long Chain Polyunsaturated Fatty Acid (n3 and n6)	ESI negative	0.659 (0.465)	1.105 (0.980)	0.652 (0.601)	0.242	0.3024
biliverdin	Cofactors and Vitamins	Hemoglobin and Porphyrin Metabolism	ESI positive	0.191 (0.000)	0.421 (0.305)	0.297 (0.282)	0.0535	0.3032
OAHSA (18:1/OH-18:0)	Lipid	Fatty Acid Hydroxyl Fatty Acid	ESI positive	0.085 (0.000)	0.108 (0.064)	0.317 (0.442)	0.2979	0.3032
N-acetylcitrulline	Amino Acid	Urea cycle; Arginine and Proline Metabolism	ESI negative	0.105 (0.000)	1.095 (0.765)	1.514 (0.797)	0.0046	0.3043
trans-urocanate	Amino Acid	Histidine Metabolism	ESI positive	1.063 (0.265)	1.281 (0.635)	0.907 (0.769)	0.3631	0.3045
N6,N6-dimethyllysine	Amino Acid	Lysine Metabolism	ESI positive	0.404 (0.261)	6.287 (4.689)	4.449 (1.878)	0.0004	0.3071
equol sulfate	Xenobiotics	Food Component/Plant	ESI negative	0.127 (0.000)	0.450 (0.487)	0.774 (0.472)	0.0817	0.3089
aconitate [cis or trans]	Energy	TCA Cycle	ESI negative	0.463 (0.119)	0.782 (0.437)	0.777 (0.180)	0.0592	0.311
N-oleoyltaurine	Lipid	Endocannabinoid	ESI negative	0.340 (0.000)	0.810 (0.709)	1.246 (1.365)	0.0815	0.311
3-indoxyl sulfate	Amino Acid	Tryptophan Metabolism	ESI negative	0.018 (0.000)	2.342 (4.213)	4.143 (5.829)	0.1366	0.311
1,2-dilinoleoyl-GPC (18:2/18:2)	Lipid	Phosphatidylcholine (PC)	ESI positive	0.368 (0.405)	1.979 (3.037)	0.237 (0.133)	0.3263	0.311
suberate (C8-DC)	Lipid	Fatty Acid, Dicarboxylate	LC/MS Polar	0.026 (0.014)	0.016 (0.008)	0.012 (0.005)	0.0848	0.3137
docosapentaenoate (n6 DPA; 22:5n6)	Lipid	Long Chain Polyunsaturated Fatty Acid (n3 and n6)	ESI negative	1.057 (1.018)	2.898 (2.091)	1.890 (1.716)	0.0932	0.32
2-hydroxyphenylacetate	Amino Acid	Phenylalanine Metabolism	LC/MS Polar	0.093 (0.048)	0.131 (0.065)	0.097 (0.070)	0.1724	0.32
glucosamine 6-sulfate	Carbohydrate	Aminosugar Metabolism	LC/MS Polar	0.043 (0.000)	0.652 (1.225)	4.764 (10.798)	0.1742	0.32
indolelactate	Amino Acid	Tryptophan Metabolism	ESI negative	0.041 (0.023)	2.527 (1.342)	3.580 (2.689)	0.0014	0.3211
asparagine	Amino Acid	Alanine and Aspartate Metabolism	ESI positive	2.351 (2.190)	26.385 (15.811)	33.017 (7.587)	0.0018	0.3266
vanillate	Xenobiotics	Food Component/Plant	ESI negative	0.365 (0.000)	0.522 (0.140)	0.622 (0.252)	0.0099	0.3277
histidylalanine	Peptide	Dipeptide	ESI negative	0.180 (0.160)	1.365 (1.081)	0.983 (0.213)	0.0026	0.3286
tartronate (hydroxymalonate)	Xenobiotics	Food Component/Plant	ESI negative	0.572 (0.371)	1.166 (1.486)	0.388 (0.180)	0.7059	0.3303
threonylphenylalanine	Peptide	Dipeptide	ESI negative	0.816 (0.372)	2.431 (1.874)	3.424 (2.061)	0.0329	0.3308
1-palmitoleoylglycerol (16:1)*	Lipid	Monoacylglycerol	ESI negative	3.465 (4.914)	1.853 (1.801)	2.875 (6.042)	1	0.3336
hexadecasphingosine (d16:1)*	Lipid	Sphingosines	ESI positive	4.160 (1.125)	2.662 (1.069)	2.183 (0.784)	0.0105	0.3374
guanosine	Nucleotide	Purine Metabolism, Guanine containing	ESI negative	3.427 (2.193)	0.519 (0.500)	1.276 (1.719)	0.0039	0.3393
1-stearoyl-2-arachidonoyl-GPI (18:0/20:4)	Lipid	Phosphatidylinositol (PI)	ESI positive	0.587 (1.172)	4.418 (6.034)	0.862 (0.718)	0.014	0.3393
methyl indole-3-acetate	Xenobiotics	Food Component/Plant	ESI positive	0.197 (0.000)	0.979 (0.891)	1.657 (1.313)	0.03	0.3393
1-arachidonoyl-GPE (20:4n6)*	Lipid	Lysophospholipid	ESI positive	0.654 (0.268)	2.520 (2.957)	1.140 (1.099)	0.0743	0.3393
deoxycholic acid 3-sulfate	Lipid	Secondary Bile Acid Metabolism	ESI negative	0.870 (0.731)	1.584 (1.321)	1.008 (0.892)	0.175	0.3398
(3'-5')-guanylylcytidine	Nucleotide	Dinucleotide	ESI negative	1.826 (1.016)	0.345 (0.244)	0.264 (0.000)	0.0004	0.3466
TMP	Nucleotide	Pyrimidine Metabolism, Thymine containing	ESI negative	0.791 (0.717)	0.060 (0.148)	0.011 (0.000)	0.0006	0.3466
(3'-5')-adenylylguanosine*	Nucleotide	Dinucleotide	ESI negative	1.702 (1.060)	0.254 (0.079)	0.228 (0.000)	0.001	0.3466
(3'-5')-cytidylylcytidine*	Nucleotide	Dinucleotide	ESI negative	0.745 (0.279)	0.345 (0.025)	0.337 (0.000)	0.0036	0.3466
(3'-5')-cytidylyluridine*	Nucleotide	Dinucleotide	ESI negative	0.859 (0.568)	0.199 (0.051)	0.181 (0.000)	0.0036	0.3466
(3'-5')-uridylylcytidine*	Nucleotide	Dinucleotide	ESI negative	0.524 (0.240)	0.202 (0.053)	0.184 (0.000)	0.0036	0.3466
sedoheptulose-7-phosphate	Carbohydrate	Pentose Phosphate Pathway	ESI negative	0.044 (0.059)	0.011 (0.003)	0.010 (0.000)	0.2254	0.3466
6-oxopiperidine-2-carboxylate	Amino Acid	Lysine Metabolism	ESI negative	0.325 (0.000)	0.363 (0.112)	0.325 (0.000)	0.3466	0.3466
linoleoyl ethanolamide	Lipid	Endocannabinoid	ESI negative	0.115 (0.000)	0.116 (0.002)	0.115 (0.000)	0.3466	0.3466
adipoylcarnitine (C6-DC)	Lipid	Fatty Acid Metabolism (Acyl Carnitine, Dicarboxylate)	ESI positive	0.029 (0.000)	0.864 (0.735)	1.114 (0.175)	0.0093	0.3496
1-(1-enyl-stearoyl)-GPE (P-18:0)*	Lipid	Lysoplasmalogen	ESI positive	0.577 (0.413)	3.469 (2.256)	2.535 (1.332)	0.0002	0.3498
N-stearoyl-sphinganine (d18:0/18:0)*	Lipid	Dihydroceramides	ESI positive	0.725 (0.307)	0.821 (0.430)	0.642 (0.262)	0.5934	0.3502
linoleoyl-arachidonoyl-glycerol (18:2/20:4) [2]*	Lipid	Diacylglycerol	ESI positive	0.554 (0.690)	0.903 (1.595)	0.356 (0.710)	0.9264	0.3507
threonate	Cofactors and Vitamins	Ascorbate and Aldarate Metabolism	LC/MS Polar	0.966 (0.765)	5.584 (6.201)	6.849 (5.518)	0.0008	0.351
1-oleoyl-GPC (18:1)	Lipid	Lysophospholipid	ESI positive	0.386 (0.394)	3.750 (3.140)	2.923 (2.570)	0.0008	0.351
allantoin	Nucleotide	Purine Metabolism, (Hypo)Xanthine/Inosine containing	LC/MS Polar	0.649 (0.385)	31.054 (75.774)	119.200 (212.043)	0.0012	0.351
cytosine	Nucleotide	Pyrimidine Metabolism, Cytidine containing	ESI positive	1.123 (0.958)	0.299 (0.197)	0.162 (0.060)	0.0028	0.351
1,2-dipalmitoyl-GPC (16:0/16:0)	Lipid	Phosphatidylcholine (PC)	ESI positive	1.303 (2.169)	6.721 (7.310)	1.985 (0.796)	0.0028	0.351
1-stearoyl-GPS (18:0)*	Lipid	Lysophospholipid	ESI negative	2.152 (2.987)	6.224 (5.165)	3.182 (1.666)	0.0056	0.351
tauro-beta-muricholate	Lipid	Primary Bile Acid Metabolism	ESI negative	0.179 (0.101)	5.214 (4.584)	25.320 (33.007)	0.0109	0.351
alpha-tocopherol acetate	Cofactors and Vitamins	Tocopherol Metabolism	ESI positive	0.963 (0.585)	0.380 (0.173)	0.557 (0.339)	0.0177	0.351
1-myristoyl-2-palmitoyl-GPC (14:0/16:0)	Lipid	Phosphatidylcholine (PC)	ESI positive	1.457 (2.148)	5.826 (6.677)	1.657 (0.833)	0.04	0.351
myristate (14:0)	Lipid	Long Chain Saturated Fatty Acid	ESI negative	2.513 (2.495)	0.937 (0.701)	0.773 (0.945)	0.077	0.351
3-ketosphinganine	Lipid	Sphingolipid Synthesis	ESI positive	3.576 (0.971)	2.511 (1.698)	1.657 (1.343)	0.1218	0.351
N-acetylhistidine	Amino Acid	Histidine Metabolism	ESI positive	0.829 (0.524)	3.467 (4.779)	8.752 (8.838)	0.1615	0.351
1-stearoyl-2-arachidonoyl-GPE (18:0/20:4)	Lipid	Phosphatidylethanolamine (PE)	ESI positive	1.594 (2.229)	6.620 (9.998)	1.453 (1.202)	0.2224	0.351
erucate (22:1n9)	Lipid	Long Chain Monounsaturated Fatty Acid	ESI negative	4.709 (3.191)	4.399 (3.397)	3.618 (3.896)	0.844	0.351
oxalate (ethanedioate)	Cofactors and Vitamins	Ascorbate and Aldarate Metabolism	ESI negative	0.592 (0.376)	0.553 (0.298)	0.405 (0.147)	0.9314	0.351
1-linoleoylglycerol (18:2)	Lipid	Monoacylglycerol	ESI negative	0.825 (1.427)	0.326 (0.243)	0.361 (0.589)	1	0.351
glycerol	Lipid	Glycerolipid Metabolism	ESI negative	2.067 (3.116)	1.174 (1.062)	0.848 (1.220)	1	0.351
azelate (nonanedioate; C9)	Lipid	Fatty Acid, Dicarboxylate	ESI negative	0.014 (0.005)	0.010 (0.006)	0.008 (0.005)	0.216	0.3535
leucylalanine	Peptide	Dipeptide	ESI positive	1.418 (0.867)	2.858 (1.947)	3.536 (0.675)	0.0675	0.3537
N-acetylsphingosine	Lipid	Sphingosines	ESI negative	0.237 (0.148)	0.054 (0.000)	0.058 (0.009)	0.0059	0.3559
pheophytin A	Xenobiotics	Food Component/Plant	ESI positive	0.010 (0.003)	0.007 (0.000)	0.007 (0.000)	0.0419	0.3559
taurohyodeoxycholic acid	Lipid	Secondary Bile Acid Metabolism	ESI negative	0.108 (0.000)	0.108 (0.000)	0.125 (0.047)	0.3466	0.3559
allo-threonine	Amino Acid	Glycine, Serine and Threonine Metabolism	LC/MS Polar	0.220 (0.128)	0.177 (0.000)	0.184 (0.018)	0.3466	0.3559
N-methylalanine	Amino Acid	Alanine and Aspartate Metabolism	ESI positive	0.297 (0.122)	0.116 (0.077)	0.082 (0.063)	0.0018	0.36
C-glycosyltryptophan	Amino Acid	Tryptophan Metabolism	ESI positive	0.233 (0.000)	0.840 (0.685)	1.271 (1.135)	0.0287	0.3609
uracil	Nucleotide	Pyrimidine Metabolism, Uracil containing	ESI positive	1.063 (0.256)	1.033 (0.472)	0.842 (0.294)	0.8719	0.3645
salicylate	Xenobiotics	Drug - Topical Agents	LC/MS Polar	0.043 (0.021)	0.061 (0.041)	0.050 (0.036)	0.2461	0.3647
glutamate, gamma-methyl ester	Amino Acid	Glutamate Metabolism	ESI positive	0.349 (0.137)	0.938 (0.282)	1.109 (0.445)	0.0001	0.365
mead acid (20:3n9)	Lipid	Long Chain Polyunsaturated Fatty Acid (n3 and n6)	ESI negative	1.348 (1.114)	8.005 (5.987)	5.513 (4.192)	0.0102	0.3659
glutarate (C5-DC)	Lipid	Fatty Acid, Dicarboxylate	LC/MS Polar	0.113 (0.059)	0.449 (0.175)	0.611 (0.417)	0.0003	0.366
3-methyl-2-oxovalerate	Amino Acid	Leucine, Isoleucine and Valine Metabolism	ESI negative	1.336 (0.624)	2.669 (1.955)	3.824 (3.036)	0.0812	0.3703
2'-deoxycytidine	Nucleotide	Pyrimidine Metabolism, Cytidine containing	ESI positive	1.816 (0.619)	1.426 (0.693)	1.138 (0.504)	0.2263	0.3712
acetylcarnitine (C2)	Lipid	Fatty Acid Metabolism (Acyl Carnitine, Short Chain)	ESI positive	1.047 (1.072)	6.086 (4.412)	4.398 (2.325)	0.0005	0.3763
gamma-glutamyltryptophan	Peptide	Gamma-glutamyl Amino Acid	ESI positive	0.114 (0.000)	1.191 (0.891)	1.622 (1.026)	0.0067	0.3842
erythritol	Xenobiotics	Food Component/Plant	LC/MS Polar	0.274 (0.000)	0.703 (0.764)	1.104 (1.189)	0.1304	0.3846
N1-Methyl-2-pyridone-5-carboxamide	Cofactors and Vitamins	Nicotinate and Nicotinamide Metabolism	ESI positive	0.088 (0.000)	0.913 (0.414)	1.086 (0.339)	0.0003	0.3854
galactitol (dulcitol)	Carbohydrate	Fructose, Mannose and Galactose Metabolism	LC/MS Polar	0.142 (0.154)	0.834 (1.115)	1.201 (0.955)	0.0236	0.3936
N-acetylglycine	Amino Acid	Glycine, Serine and Threonine Metabolism	ESI negative	0.299 (0.123)	0.520 (0.473)	0.299 (0.192)	0.3762	0.3936
3-sulfo-L-alanine	Amino Acid	Methionine, Cysteine, SAM and Taurine Metabolism	ESI positive	0.862 (0.476)	1.581 (0.310)	1.380 (0.600)	0.0016	0.3967
methionine sulfoxide	Amino Acid	Methionine, Cysteine, SAM and Taurine Metabolism	ESI positive	0.480 (0.170)	1.006 (0.284)	0.900 (0.165)	0.0002	0.3978
margarate (17:0)	Lipid	Long Chain Saturated Fatty Acid	ESI negative	1.216 (0.668)	0.502 (0.301)	0.382 (0.233)	0.0136	0.4018
margaroyl ethanolamide*	Lipid	Endocannabinoid	ESI positive	1.247 (0.289)	0.538 (0.299)	0.432 (0.147)	0.0001	0.4039
arachidoylcarnitine (C20)*	Lipid	Fatty Acid Metabolism (Acyl Carnitine, Long Chain Saturated)	ESI positive	0.272 (0.148)	1.557 (0.834)	1.218 (0.750)	0.0001	0.4079
orotidine	Nucleotide	Pyrimidine Metabolism, Orotate containing	LC/MS Polar	0.103 (0.053)	1.818 (1.494)	1.844 (2.487)	0.0002	0.4079
1-methyladenine	Nucleotide	Purine Metabolism, Adenine containing	ESI positive	0.827 (0.449)	4.413 (4.110)	4.172 (5.339)	0.0008	0.4079
tyrosol	Xenobiotics	Food Component/Plant	ESI negative	0.270 (0.089)	2.795 (2.672)	1.270 (0.786)	0.0011	0.4079
1-palmitoyl-2-stearoyl-GPC (16:0/18:0)	Lipid	Phosphatidylcholine (PC)	ESI positive	0.641 (1.008)	5.742 (7.044)	1.882 (0.590)	0.0012	0.4079
2-aminoadipate	Amino Acid	Lysine Metabolism	ESI negative	0.253 (0.121)	1.224 (0.887)	1.017 (0.969)	0.0014	0.4079
bilirubin	Cofactors and Vitamins	Hemoglobin and Porphyrin Metabolism	ESI positive	0.412 (0.343)	1.841 (1.857)	1.252 (1.283)	0.004	0.4079
1-oleoyl-GPE (18:1)	Lipid	Lysophospholipid	ESI positive	0.331 (0.360)	2.077 (2.337)	1.019 (0.579)	0.0046	0.4079
1-dihomo-linolenylglycerol (20:3)	Lipid	Monoacylglycerol	ESI negative	0.916 (0.957)	2.720 (2.768)	1.286 (1.136)	0.0418	0.4079
guanidinoacetate	Amino Acid	Creatine Metabolism	ESI positive	1.088 (0.581)	2.101 (1.576)	1.350 (0.423)	0.077	0.4079
1-stearoyl-2-oleoyl-GPC (18:0/18:1)	Lipid	Phosphatidylcholine (PC)	ESI positive	1.487 (1.498)	8.257 (11.983)	1.899 (0.910)	0.077	0.4079
1-(1-enyl-stearoyl)-2-arachidonoyl-GPE (P-18:0/20:4)*	Lipid	Plasmalogen	ESI positive	1.499 (1.735)	11.531 (19.734)	2.110 (1.459)	0.0939	0.4079
1-palmitoyl-2-linoleoyl-GPC (16:0/18:2)	Lipid	Phosphatidylcholine (PC)	ESI positive	1.794 (1.513)	9.177 (14.098)	1.952 (0.927)	0.1135	0.4079
benzoate	Xenobiotics	Benzoate Metabolism	ESI negative	0.561 (0.119)	0.707 (0.235)	0.640 (0.294)	0.1145	0.4079
N-acetyl-cadaverine	Amino Acid	Lysine Metabolism	ESI positive	0.260 (0.054)	0.534 (0.600)	0.625 (0.470)	0.1359	0.4079
N-acetylaspartate (NAA)	Amino Acid	Alanine and Aspartate Metabolism	LC/MS Polar	0.284 (0.188)	0.477 (0.407)	0.443 (0.704)	0.2232	0.4079
1-oleoyl-2-linoleoyl-GPC (18:1/18:2)*	Lipid	Phosphatidylcholine (PC)	ESI positive	0.792 (0.648)	5.596 (10.091)	0.810 (0.429)	0.3865	0.4079
mannitol/sorbitol	Carbohydrate	Fructose, Mannose and Galactose Metabolism	LC/MS Polar	0.803 (0.509)	0.995 (0.897)	2.666 (3.689)	0.5457	0.4079
methylphosphate	Nucleotide	Purine and Pyrimidine Metabolism	ESI positive	0.317 (0.397)	0.223 (0.218)	0.334 (0.293)	0.6582	0.4079
protoporphyrin IX	Cofactors and Vitamins	Hemoglobin and Porphyrin Metabolism	ESI positive	1.674 (1.041)	1.878 (1.275)	2.507 (1.265)	0.7304	0.4079
N-acetylmuramate	Carbohydrate	Aminosugar Metabolism	ESI negative	0.356 (0.172)	0.387 (0.307)	0.289 (0.219)	0.7962	0.4079
ergothioneine	Xenobiotics	Food Component/Plant	ESI positive	0.289 (0.227)	0.864 (0.947)	0.554 (0.908)	0.1088	0.415
2'-deoxyguanosine	Nucleotide	Purine Metabolism, Guanine containing	ESI negative	1.771 (1.112)	0.478 (0.475)	0.751 (0.831)	0.0008	0.4193
1-palmitoleoyl-GPC* (16:1)*	Lipid	Lysophospholipid	ESI positive	0.365 (0.211)	1.879 (1.736)	1.433 (1.485)	0.0019	0.4269
1-stearoyl-2-docosahexaenoyl-GPE (18:0/22:6)*	Lipid	Phosphatidylethanolamine (PE)	ESI positive	0.929 (1.909)	4.979 (6.856)	1.066 (0.952)	0.023	0.4269
2-linoleoylglycerol (18:2)	Lipid	Monoacylglycerol	ESI negative	0.630 (1.095)	0.370 (0.382)	0.395 (0.754)	0.4219	0.4269
N-acetyl-isoputreanine*	Amino Acid	Polyamine Metabolism	ESI positive	0.049 (0.029)	0.704 (0.294)	0.825 (0.298)	0.0004	0.429
tryptophan	Amino Acid	Tryptophan Metabolism	ESI positive	0.734 (0.298)	4.779 (1.932)	5.428 (0.965)	0.0002	0.4315
arginine	Amino Acid	Urea cycle; Arginine and Proline Metabolism	ESI positive	1.450 (1.306)	4.378 (3.086)	3.280 (2.064)	0.0142	0.4325
cytidine	Nucleotide	Pyrimidine Metabolism, Cytidine containing	ESI positive	1.548 (0.231)	1.249 (0.288)	1.367 (0.291)	0.0273	0.4337
N-acetylcysteine	Amino Acid	Methionine, Cysteine, SAM and Taurine Metabolism	ESI positive	0.136 (0.000)	0.957 (0.608)	1.155 (0.288)	0.0037	0.4419
1-carboxyethylvaline	Amino Acid	Leucine, Isoleucine and Valine Metabolism	ESI negative	0.347 (0.000)	0.835 (0.475)	0.668 (0.335)	0.0151	0.4425
pyruvate	Carbohydrate	Glycolysis, Gluconeogenesis, and Pyruvate Metabolism	LC/MS Polar	1.158 (0.420)	4.214 (2.676)	3.334 (1.463)	0.0089	0.4482
(14 or 15)-methylpalmitate (a17:0 or i17:0)	Lipid	Fatty Acid, Branched	ESI negative	1.561 (0.763)	0.498 (0.250)	0.400 (0.248)	0.0028	0.4491
2-hydroxystearate	Lipid	Fatty Acid, Monohydroxy	ESI negative	2.795 (1.780)	0.607 (0.352)	0.484 (0.260)	0.006	0.4542
4-acetamidobutanoate	Amino Acid	Polyamine Metabolism	ESI positive	0.388 (0.174)	0.714 (0.734)	0.382 (0.262)	0.8946	0.4574
3-methylhistidine	Amino Acid	Histidine Metabolism	ESI positive	0.121 (0.120)	4.005 (2.882)	3.093 (1.424)	0.0003	0.4576
nisinate (24:6n3)	Lipid	Long Chain Polyunsaturated Fatty Acid (n3 and n6)	ESI negative	0.755 (1.526)	1.824 (1.567)	1.166 (1.239)	0.0045	0.4584
lanosterol	Lipid	Sterol	ESI positive	0.320 (0.073)	0.816 (0.356)	0.681 (0.351)	0.014	0.4596
2-hydroxy-3-methylvalerate	Amino Acid	Leucine, Isoleucine and Valine Metabolism	ESI negative	0.117 (0.073)	1.892 (0.938)	2.323 (1.334)	0.0005	0.4601
linoleoylcarnitine (C18:2)*	Lipid	Fatty Acid Metabolism (Acyl Carnitine, Polyunsaturated)	ESI positive	0.111 (0.044)	1.507 (1.060)	1.147 (0.893)	0.0003	0.4698
phenyllactate (PLA)	Amino Acid	Phenylalanine Metabolism	ESI negative	0.078 (0.079)	3.784 (2.928)	4.378 (2.284)	0.0004	0.4698
orotate	Nucleotide	Pyrimidine Metabolism, Orotate containing	LC/MS Polar	0.224 (0.122)	6.019 (6.974)	3.078 (2.152)	0.0005	0.4698
3-aminoisobutyrate	Nucleotide	Pyrimidine Metabolism, Thymine containing	ESI positive	0.462 (0.201)	3.730 (4.497)	1.745 (1.008)	0.0007	0.4698
5-methylcytosine	Nucleotide	Pyrimidine Metabolism, Cytidine containing	ESI positive	0.248 (0.226)	1.542 (1.472)	0.749 (0.326)	0.0012	0.4698
mannose	Carbohydrate	Fructose, Mannose and Galactose Metabolism	LC/MS Polar	0.411 (0.158)	0.923 (0.546)	0.702 (0.228)	0.0019	0.4698
1-palmitoyl-2-linoleoyl-GPE (16:0/18:2)	Lipid	Phosphatidylethanolamine (PE)	ESI positive	0.236 (0.113)	0.656 (0.438)	0.592 (0.516)	0.0019	0.4698
1-palmitoyl-GPG (16:0)*	Lipid	Lysophospholipid	ESI negative	0.453 (0.240)	1.381 (1.247)	1.004 (1.032)	0.004	0.4698
histamine	Amino Acid	Histidine Metabolism	ESI positive	0.059 (0.000)	1.244 (0.948)	1.400 (0.790)	0.0056	0.4698
1-methyl-4-imidazoleacetate	Amino Acid	Histidine Metabolism	ESI positive	0.178 (0.083)	0.839 (0.598)	1.351 (1.258)	0.0106	0.4698
2'-deoxyuridine	Nucleotide	Pyrimidine Metabolism, Uracil containing	ESI negative	1.367 (0.774)	0.738 (0.531)	0.666 (0.684)	0.0616	0.4698
palmitoyl ethanolamide	Lipid	Endocannabinoid	ESI positive	0.781 (0.268)	1.133 (0.455)	0.982 (0.357)	0.0624	0.4698
riboflavin (Vitamin B2)	Cofactors and Vitamins	Riboflavin Metabolism	ESI positive	0.700 (0.270)	1.014 (0.474)	0.906 (0.602)	0.0625	0.4698
trimethylamine N-oxide	Lipid	Phospholipid Metabolism	ESI positive	0.501 (0.248)	1.554 (1.577)	0.719 (0.284)	0.0927	0.4698
1-palmitoyl-2-palmitoleoyl-GPC (16:0/16:1)*	Lipid	Phosphatidylcholine (PC)	ESI positive	2.423 (3.659)	11.284 (14.958)	2.198 (1.272)	0.0939	0.4698
palmitate (16:0)	Lipid	Long Chain Saturated Fatty Acid	ESI negative	1.368 (0.894)	0.927 (0.502)	0.828 (0.737)	0.2154	0.4698
thymine	Nucleotide	Pyrimidine Metabolism, Thymine containing	ESI negative	0.769 (0.381)	0.891 (0.467)	0.800 (0.626)	0.5537	0.4698
3-hydroxybutyrate (BHBA)	Lipid	Ketone Bodies	LC/MS Polar	0.465 (0.235)	0.687 (0.761)	0.600 (0.353)	0.6048	0.4698
linoleate (18:2n6)	Lipid	Long Chain Polyunsaturated Fatty Acid (n3 and n6)	ESI negative	1.335 (2.619)	0.594 (0.573)	0.393 (0.525)	0.9314	0.4698
histidine	Amino Acid	Histidine Metabolism	ESI negative	0.628 (0.220)	5.489 (3.373)	6.653 (2.766)	0.0025	0.4722
lignoceroyl ethanolamide (24:0)*	Lipid	Endocannabinoid	ESI positive	0.420 (0.122)	0.729 (0.233)	0.652 (0.180)	0.0028	0.4801
imidazole propionate	Amino Acid	Histidine Metabolism	ESI positive	0.485 (0.535)	2.936 (1.581)	3.482 (1.384)	0.0003	0.4821
lysine	Amino Acid	Lysine Metabolism	ESI positive	0.490 (0.149)	2.472 (1.060)	2.809 (0.717)	0.0005	0.4835
sphingadienine	Lipid	Sphingolipid Synthesis	ESI positive	0.359 (0.105)	0.371 (0.107)	0.460 (0.305)	0.8153	0.4859
palmitoyl-linoleoyl-glycerol (16:0/18:2) [1]*	Lipid	Diacylglycerol	ESI positive	0.205 (0.313)	0.064 (0.082)	0.058 (0.074)	0.5468	0.4869
thiamin (Vitamin B1)	Cofactors and Vitamins	Thiamine Metabolism	ESI positive	0.199 (0.126)	1.535 (0.631)	1.322 (0.551)	0.0001	0.4918
methylsuccinate	Amino Acid	Leucine, Isoleucine and Valine Metabolism	LC/MS Polar	0.209 (0.127)	0.477 (0.253)	0.585 (0.368)	0.0244	0.4963
oleoyl-arachidonoyl-glycerol (18:1/20:4) [2]*	Lipid	Diacylglycerol	ESI positive	1.414 (1.685)	2.340 (4.008)	1.473 (3.147)	0.8844	0.5035
heptadecasphingosine (d17:1)	Lipid	Sphingosines	ESI positive	1.932 (0.333)	2.147 (0.906)	1.842 (0.859)	0.5196	0.5067
10-nonadecenoate (19:1n9)	Lipid	Long Chain Monounsaturated Fatty Acid	ESI negative	3.132 (5.533)	1.607 (1.690)	0.851 (1.073)	0.5924	0.5073
4-hydroxyhippurate	Xenobiotics	Benzoate Metabolism	ESI negative	0.112 (0.000)	0.826 (1.126)	1.002 (0.891)	0.0933	0.5143
dimethylglycine	Amino Acid	Glycine, Serine and Threonine Metabolism	ESI positive	0.185 (0.040)	1.205 (0.672)	1.018 (0.347)	0.0019	0.516
1-palmitoyl-GPA (16:0)	Lipid	Lysophospholipid	ESI positive	0.048 (0.019)	0.125 (0.067)	0.151 (0.085)	0.018	0.516
2-hydroxypalmitate	Lipid	Fatty Acid, Monohydroxy	ESI negative	3.385 (2.144)	0.249 (0.138)	0.213 (0.166)	0.0023	0.5241
oleoyl-linoleoyl-glycerol (18:1/18:2) [2]	Lipid	Diacylglycerol	ESI positive	0.316 (0.425)	0.117 (0.202)	0.131 (0.274)	0.5457	0.5247
phenylacetyltaurine	Peptide	Acetylated Peptides	ESI negative	0.076 (0.000)	1.424 (1.074)	2.043 (1.877)	0.0055	0.5251
hypoxanthine	Nucleotide	Purine Metabolism, (Hypo)Xanthine/Inosine containing	ESI positive	0.910 (0.200)	0.738 (0.215)	0.676 (0.144)	0.0983	0.5268
cysteine	Amino Acid	Methionine, Cysteine, SAM and Taurine Metabolism	ESI positive	0.608 (0.108)	2.622 (1.342)	3.006 (0.913)	0.002	0.5279
N-carbamoylalanine	Amino Acid	Alanine and Aspartate Metabolism	ESI positive	0.498 (0.195)	0.928 (0.585)	1.168 (0.904)	0.0454	0.5298
lysylleucine	Peptide	Dipeptide	ESI positive	1.507 (0.573)	1.634 (0.781)	1.940 (1.130)	0.7004	0.5313
isoleucine	Amino Acid	Leucine, Isoleucine and Valine Metabolism	ESI positive	0.937 (0.311)	2.552 (0.906)	2.762 (0.330)	0.0005	0.5335
dimethylmalonic acid	Lipid	Fatty Acid, Dicarboxylate	LC/MS Polar	0.588 (0.000)	0.599 (0.033)	0.603 (0.035)	0.3466	0.5345
gamma-glutamylmethionine	Peptide	Gamma-glutamyl Amino Acid	ESI positive	1.164 (0.774)	9.194 (7.763)	9.160 (3.608)	0.0002	0.536
N-palmitoyl-sphinganine (d18:0/16:0)	Lipid	Dihydroceramides	ESI positive	0.254 (0.108)	1.078 (0.778)	0.683 (0.177)	0.0003	0.536
1-(1-enyl-oleoyl)-GPE (P-18:1)*	Lipid	Lysoplasmalogen	ESI positive	0.625 (0.646)	5.036 (4.931)	2.903 (1.386)	0.0005	0.536
glycerophosphorylcholine (GPC)	Lipid	Phospholipid Metabolism	ESI positive	0.659 (0.720)	15.857 (26.443)	22.605 (19.700)	0.0008	0.536
adenosine	Nucleotide	Purine Metabolism, Adenine containing	ESI positive	5.107 (2.345)	1.175 (1.713)	2.174 (4.296)	0.0012	0.536
homocitrulline	Amino Acid	Urea cycle; Arginine and Proline Metabolism	ESI positive	0.908 (0.490)	2.939 (1.711)	3.793 (4.978)	0.0072	0.536
heptanoate (7:0)	Lipid	Medium Chain Fatty Acid	ESI negative	0.340 (0.242)	0.877 (0.528)	1.111 (0.676)	0.0078	0.536
stearoyl ethanolamide	Lipid	Endocannabinoid	ESI positive	0.610 (0.200)	0.991 (0.398)	0.928 (0.542)	0.0207	0.536
1-(1-enyl-palmitoyl)-2-oleoyl-GPE (P-16:0/18:1)*	Lipid	Plasmalogen	ESI positive	1.262 (1.079)	6.260 (8.998)	1.757 (0.683)	0.0939	0.536
carnitine	Lipid	Carnitine Metabolism	ESI positive	1.033 (0.519)	0.860 (0.543)	0.581 (0.297)	0.3865	0.536
oleate/vaccenate (18:1)	Lipid	Long Chain Monounsaturated Fatty Acid	ESI negative	1.410 (2.279)	1.057 (0.836)	0.821 (0.930)	0.6665	0.536
linolenate (18:3n3 or 3n6)	Lipid	Long Chain Polyunsaturated Fatty Acid (n3 and n6)	ESI negative	1.638 (3.056)	0.562 (0.588)	0.441 (0.711)	0.7304	0.536
cholate sulfate	Lipid	Primary Bile Acid Metabolism	ESI negative	1.318 (0.610)	1.247 (1.320)	0.507 (0.546)	0.8867	0.536
N-acetyl-beta-alanine	Nucleotide	Pyrimidine Metabolism, Uracil containing	LC/MS Polar	0.294 (0.000)	0.800 (0.247)	0.694 (0.416)	0.0003	0.5373
N-acetylmethionine	Amino Acid	Methionine, Cysteine, SAM and Taurine Metabolism	ESI negative	0.481 (0.292)	10.932 (6.674)	9.158 (3.927)	0.0015	0.544
pyridoxate	Cofactors and Vitamins	Vitamin B6 Metabolism	ESI negative	0.274 (0.069)	0.487 (0.122)	0.440 (0.181)	0.0003	0.5442
1-stearoyl-2-oleoyl-GPS (18:0/18:1)	Lipid	Phosphatidylserine (PS)	ESI positive	1.358 (1.816)	6.931 (14.567)	0.471 (0.317)	0.9641	0.55
beta-muricholate	Lipid	Primary Bile Acid Metabolism	ESI negative	4.733 (1.129)	4.415 (1.771)	4.967 (1.817)	0.6563	0.5505
phenylalanylalanine	Peptide	Dipeptide	ESI positive	0.394 (0.276)	1.136 (0.530)	1.279 (0.367)	0.0018	0.553
cis-4-decenoate (10:1n6)*	Lipid	Medium Chain Fatty Acid	ESI negative	0.288 (0.189)	1.394 (1.038)	1.117 (0.680)	0.0083	0.5531
5alpha-androstan-3alpha,17alpha-diol monosulfate	Lipid	Androgenic Steroids	ESI negative	0.184 (0.000)	0.846 (0.550)	1.168 (1.286)	0.0068	0.5537
(16 or 17)-methylstearate (a19:0 or i19:0)	Lipid	Fatty Acid, Branched	ESI negative	3.745 (2.111)	2.237 (1.142)	1.837 (1.518)	0.0777	0.5565
2-isopropylmalate	Xenobiotics	Food Component/Plant	LC/MS Polar	0.137 (0.096)	0.977 (0.728)	1.187 (0.656)	0.0068	0.5595
adrenate (22:4n6)	Lipid	Long Chain Polyunsaturated Fatty Acid (n3 and n6)	ESI negative	0.574 (0.407)	1.851 (2.096)	1.061 (0.630)	0.0401	0.5602
ornithine	Amino Acid	Urea cycle; Arginine and Proline Metabolism	ESI positive	0.167 (0.044)	1.883 (1.030)	2.254 (1.493)	0.0001	0.5651
kynurenate	Amino Acid	Tryptophan Metabolism	ESI negative	0.147 (0.060)	0.709 (0.364)	0.819 (0.384)	0.0016	0.5685
phenylalanine	Amino Acid	Phenylalanine Metabolism	ESI positive	0.787 (0.284)	3.072 (1.271)	3.344 (0.522)	0.0006	0.5726
1-palmitoyl-2-arachidonoyl-GPE (16:0/20:4)*	Lipid	Phosphatidylethanolamine (PE)	ESI positive	1.006 (0.767)	3.701 (1.926)	3.183 (1.587)	0.0003	0.5744
maleate	Lipid	Fatty Acid, Dicarboxylate	LC/MS Polar	0.466 (0.104)	1.115 (0.554)	0.972 (0.405)	0.0078	0.5773
3b-hydroxy-5-cholenoic acid	Lipid	Secondary Bile Acid Metabolism	ESI negative	1.762 (0.879)	0.311 (0.229)	0.351 (0.475)	0.0009	0.578
N-acetyl-3-methylhistidine*	Amino Acid	Histidine Metabolism	ESI positive	0.102 (0.100)	2.088 (1.523)	2.467 (1.019)	0.0005	0.581
indolin-2-one	Xenobiotics	Food Component/Plant	ESI positive	1.290 (0.387)	0.402 (0.736)	0.233 (0.282)	0.0057	0.5841
glycitein	Xenobiotics	Food Component/Plant	ESI positive	0.008 (0.000)	0.017 (0.014)	0.012 (0.009)	0.1138	0.5841
dihydroorotate	Nucleotide	Pyrimidine Metabolism, Orotate containing	LC/MS Polar	0.532 (0.434)	0.841 (0.900)	0.626 (0.782)	0.5468	0.5841
enterolactone	Xenobiotics	Food Component/Plant	ESI negative	0.030 (0.015)	0.082 (0.088)	0.048 (0.076)	0.7212	0.5841
tricarballylate	Energy	TCA Cycle	LC/MS Polar	0.026 (0.014)	0.024 (0.019)	0.029 (0.020)	0.5894	0.5868
tyrosine	Amino Acid	Tyrosine Metabolism	ESI positive	0.867 (0.373)	4.003 (1.640)	4.393 (0.971)	0.0004	0.5871
1-methylxanthine	Xenobiotics	Xanthine Metabolism	ESI negative	0.180 (0.000)	1.411 (0.576)	1.615 (0.896)	0.0002	0.5889
behenoylcarnitine (C22)*	Lipid	Fatty Acid Metabolism (Acyl Carnitine, Long Chain Saturated)	ESI positive	0.436 (0.054)	1.381 (0.473)	1.196 (0.852)	0.0003	0.5892
N-acetylalanine	Amino Acid	Alanine and Aspartate Metabolism	LC/MS Polar	0.210 (0.155)	2.135 (2.164)	1.666 (2.054)	0.0331	0.5911
2R,3R-dihydroxybutyrate	Lipid	Fatty Acid, Dihydroxy	LC/MS Polar	0.223 (0.134)	1.220 (0.400)	1.072 (0.681)	0.0004	0.5945
2-methylcitrate/homocitrate	Energy	TCA Cycle	ESI negative	0.368 (0.247)	0.567 (0.289)	0.673 (0.344)	0.1803	0.5955
1-palmitoyl-2-oleoyl-GPE (16:0/18:1)	Lipid	Phosphatidylethanolamine (PE)	ESI positive	0.360 (0.186)	0.700 (0.695)	0.747 (0.458)	0.25	0.5964
alanine	Amino Acid	Alanine and Aspartate Metabolism	ESI positive	0.782 (0.229)	2.300 (0.970)	2.516 (0.489)	0.0014	0.6011
N-acetylserine	Amino Acid	Glycine, Serine and Threonine Metabolism	ESI positive	0.157 (0.059)	2.074 (0.972)	2.269 (0.836)	0.0001	0.6065
uridine	Nucleotide	Pyrimidine Metabolism, Uracil containing	ESI negative	1.404 (0.670)	0.481 (0.327)	0.638 (0.576)	0.0005	0.6065
phosphate	Energy	Oxidative Phosphorylation	ESI positive	15.488 (15.012)	0.277 (0.453)	0.073 (0.035)	0.0005	0.6065
4-methyl-2-oxopentanoate	Amino Acid	Leucine, Isoleucine and Valine Metabolism	ESI negative	1.153 (0.539)	2.738 (2.260)	3.220 (2.141)	0.0503	0.6065
inosine	Nucleotide	Purine Metabolism, (Hypo)Xanthine/Inosine containing	ESI positive	2.329 (1.501)	1.137 (1.559)	0.925 (0.570)	0.0625	0.6065
sedoheptulose	Carbohydrate	Pentose Metabolism	LC/MS Polar	0.581 (0.241)	0.868 (0.538)	0.635 (0.255)	0.1359	0.6065
lactobacillic acid	Xenobiotics	Bacterial/Fungal	ESI negative	0.444 (0.545)	0.461 (0.228)	0.442 (0.368)	0.3263	0.6065
thymidine	Nucleotide	Pyrimidine Metabolism, Thymine containing	ESI negative	0.854 (0.294)	1.007 (0.450)	0.981 (0.636)	0.7304	0.6065
eicosenoate (20:1n9 or 1n11)	Lipid	Long Chain Monounsaturated Fatty Acid	ESI negative	2.234 (2.152)	2.299 (1.908)	1.739 (1.429)	1	0.6065
carotene diol (2)	Cofactors and Vitamins	Vitamin A Metabolism	ESI positive	0.133 (0.028)	0.112 (0.022)	0.118 (0.025)	0.0983	0.6146
picolinate	Amino Acid	Tryptophan Metabolism	ESI positive	0.546 (0.285)	1.126 (0.557)	1.246 (0.311)	0.0468	0.6184
N6,N6,N6-trimethyllysine	Amino Acid	Lysine Metabolism	ESI positive	0.277 (0.119)	3.195 (1.730)	2.805 (1.221)	0.001	0.6216
7-methylguanine	Nucleotide	Purine Metabolism, Guanine containing	ESI negative	0.947 (0.361)	1.914 (0.578)	1.752 (0.723)	0.0006	0.6244
tyrosylglycine	Peptide	Dipeptide	ESI negative	0.231 (0.225)	1.439 (1.055)	1.252 (0.315)	0.0088	0.6244
stearate (18:0)	Lipid	Long Chain Saturated Fatty Acid	ESI negative	1.120 (0.523)	0.928 (0.434)	0.818 (0.442)	0.4093	0.6258
4-guanidinobutanoate	Amino Acid	Guanidino and Acetamido Metabolism	ESI positive	0.527 (0.464)	0.552 (0.206)	0.504 (0.168)	0.2581	0.6281
N-acetyltaurine	Amino Acid	Methionine, Cysteine, SAM and Taurine Metabolism	ESI negative	0.691 (0.536)	4.461 (2.488)	5.109 (2.739)	0.0017	0.6285
caprylate (8:0)	Lipid	Medium Chain Fatty Acid	ESI negative	0.777 (0.461)	1.253 (0.649)	1.108 (0.490)	0.04	0.6319
oleoyl-linoleoyl-glycerol (18:1/18:2) [1]	Lipid	Diacylglycerol	ESI positive	0.352 (0.522)	0.099 (0.112)	0.091 (0.124)	0.6665	0.6336
N-methylhydantoin	Amino Acid	Creatine Metabolism	ESI negative	0.135 (0.000)	0.345 (0.380)	0.795 (1.624)	0.1371	0.6408
2'-deoxyadenosine 5'-monophosphate	Nucleotide	Purine Metabolism, Adenine containing	ESI positive	0.358 (0.383)	0.096 (0.195)	0.014 (0.008)	0.0083	0.6413
4-cholesten-3-one	Lipid	Sterol	ESI positive	0.731 (0.146)	0.537 (0.110)	0.565 (0.133)	0.0057	0.6471
glycocholate sulfate	Lipid	Primary Bile Acid Metabolism	ESI negative	0.142 (0.139)	0.915 (0.643)	1.050 (0.464)	0.0049	0.6494
agmatine	Amino Acid	Polyamine Metabolism	ESI positive	0.174 (0.000)	0.414 (0.342)	0.598 (0.732)	0.0682	0.6585
sarcosine	Amino Acid	Glycine, Serine and Threonine Metabolism	ESI positive	0.947 (0.181)	2.899 (1.131)	2.635 (1.212)	0.0008	0.6603
citrate	Energy	TCA Cycle	ESI negative	1.090 (0.705)	0.852 (0.398)	0.929 (0.250)	0.3915	0.6651
proline	Amino Acid	Urea cycle; Arginine and Proline Metabolism	ESI positive	0.462 (0.183)	1.485 (0.766)	1.336 (0.513)	0.0037	0.6656
LAHSA (18:2/OH-18:0)*	Lipid	Fatty Acid Hydroxyl Fatty Acid	ESI positive	0.054 (0.000)	0.196 (0.136)	0.428 (0.595)	0.0138	0.6674
behenate (22:0)*	Lipid	Long Chain Saturated Fatty Acid	ESI negative	2.701 (1.972)	1.615 (0.930)	1.399 (1.045)	0.1622	0.6693
N,N-dimethyl-5-aminovalerate	Amino Acid	Lysine Metabolism	ESI positive	0.939 (0.866)	0.701 (0.701)	1.018 (1.887)	0.4265	0.6697
N-palmitoyltaurine	Lipid	Endocannabinoid	ESI negative	0.420 (0.000)	1.032 (0.637)	0.884 (0.468)	0.0204	0.6711
pyroglutamine*	Amino Acid	Glutamate Metabolism	ESI positive	0.188 (0.089)	0.398 (0.253)	0.563 (0.488)	0.0236	0.6711
octanoylcarnitine (C8)	Lipid	Fatty Acid Metabolism (Acyl Carnitine, Medium Chain)	ESI positive	0.237 (0.044)	1.170 (1.124)	1.376 (0.705)	0.012	0.6789
N,N,N-trimethyl-alanylproline betaine (TMAP)	Amino Acid	Urea cycle; Arginine and Proline Metabolism	ESI positive	0.013 (0.010)	1.009 (0.603)	1.184 (0.492)	0.0004	0.6806
1-(1-enyl-palmitoyl)-GPC (P-16:0)*	Lipid	Lysoplasmalogen	ESI positive	0.341 (0.051)	1.477 (1.326)	1.142 (0.786)	0.0005	0.6806
1-(1-enyl-palmitoyl)-GPE (P-16:0)*	Lipid	Lysoplasmalogen	ESI positive	0.924 (0.899)	7.513 (7.127)	4.915 (2.504)	0.0005	0.6806
N-delta-acetylornithine	Amino Acid	Urea cycle; Arginine and Proline Metabolism	ESI negative	0.184 (0.048)	0.667 (0.654)	0.488 (0.115)	0.0008	0.6806
3-ureidopropionate	Nucleotide	Pyrimidine Metabolism, Uracil containing	ESI positive	1.298 (0.590)	7.197 (6.365)	7.656 (6.546)	0.0012	0.6806
xylose	Carbohydrate	Pentose Metabolism	LC/MS Polar	0.769 (0.258)	0.257 (0.304)	0.187 (0.149)	0.0019	0.6806
N-palmitoyl-sphingadienine (d18:2/16:0)*	Lipid	Ceramides	ESI positive	0.664 (0.406)	2.750 (2.307)	1.321 (0.544)	0.004	0.6806
adenine	Nucleotide	Purine Metabolism, Adenine containing	ESI positive	6.855 (4.502)	2.023 (2.628)	1.119 (1.513)	0.0106	0.6806
2-oleoylglycerol (18:1)	Lipid	Monoacylglycerol	ESI negative	1.163 (2.127)	1.120 (1.103)	1.634 (3.200)	0.1112	0.6806
caprate (10:0)	Lipid	Medium Chain Fatty Acid	ESI negative	1.162 (0.818)	1.051 (0.491)	1.130 (0.645)	0.6665	0.6806
13-HODE + 9-HODE	Lipid	Fatty Acid, Monohydroxy	ESI negative	0.342 (0.301)	0.302 (0.214)	0.270 (0.272)	0.7962	0.6806
cysteine sulfinic acid	Amino Acid	Methionine, Cysteine, SAM and Taurine Metabolism	ESI positive	0.357 (0.163)	3.146 (1.470)	2.861 (1.233)	0.0004	0.6865
methionine	Amino Acid	Methionine, Cysteine, SAM and Taurine Metabolism	ESI positive	1.188 (0.346)	3.799 (1.691)	4.086 (0.810)	0.0015	0.6866
delta-CEHC	Cofactors and Vitamins	Tocopherol Metabolism	ESI positive	1.140 (0.538)	0.923 (0.618)	1.035 (0.448)	0.4797	0.6943
2,3-dihydroxyisovalerate	Xenobiotics	Food Component/Plant	LC/MS Polar	0.406 (0.090)	0.846 (0.565)	0.753 (0.289)	0.0484	0.698
3-hydroxyadipate*	Lipid	Fatty Acid, Dicarboxylate	LC/MS Polar	0.667 (0.601)	0.150 (0.117)	0.136 (0.068)	0.0292	0.6994
beta-hydroxyisovalerate	Amino Acid	Leucine, Isoleucine and Valine Metabolism	LC/MS Polar	0.419 (0.138)	0.345 (0.231)	0.270 (0.101)	0.1724	0.6994
kojibiose	Xenobiotics	Food Component/Plant	LC/MS Polar	0.830 (0.873)	1.666 (1.344)	1.917 (1.185)	0.1615	0.7035
maltose	Carbohydrate	Glycogen Metabolism	LC/MS Polar	0.369 (0.168)	0.013 (0.020)	0.006 (0.007)	0.0004	0.7036
trigonelline (N'-methylnicotinate)	Cofactors and Vitamins	Nicotinate and Nicotinamide Metabolism	ESI positive	0.204 (0.123)	0.941 (0.786)	2.159 (4.194)	0.0056	0.7108
1-palmitoyl-GPS (16:0)*	Lipid	Lysophospholipid	ESI negative	0.240 (0.191)	0.392 (0.277)	0.447 (0.511)	0.1943	0.7108
N-acetylleucine	Amino Acid	Leucine, Isoleucine and Valine Metabolism	ESI negative	0.260 (0.043)	3.692 (1.675)	3.986 (1.341)	0.0002	0.711
diacetylspermidine*	Amino Acid	Polyamine Metabolism	ESI positive	0.237 (0.120)	3.022 (1.899)	2.704 (1.342)	0.0023	0.713
N-acetylisoleucine	Amino Acid	Leucine, Isoleucine and Valine Metabolism	ESI negative	0.203 (0.021)	3.537 (1.845)	3.845 (1.356)	0.0014	0.7175
18-methylnonadecanoate (i20:0)	Lipid	Fatty Acid, Branched	ESI negative	1.266 (0.871)	0.884 (0.531)	0.772 (0.682)	0.2776	0.7188
12,13-DiHOME	Lipid	Fatty Acid, Dihydroxy	ESI negative	0.069 (0.059)	0.088 (0.041)	0.081 (0.040)	0.3684	0.7224
cystine	Amino Acid	Methionine, Cysteine, SAM and Taurine Metabolism	ESI negative	0.176 (0.000)	1.033 (0.631)	0.932 (0.464)	0.0036	0.7285
erythronate*	Carbohydrate	Aminosugar Metabolism	LC/MS Polar	0.458 (0.357)	0.648 (0.231)	0.608 (0.216)	0.077	0.7299
nonadecanoate (19:0)	Lipid	Long Chain Saturated Fatty Acid	ESI negative	1.631 (0.873)	1.060 (0.554)	0.949 (0.727)	0.1168	0.7335
choline	Lipid	Phospholipid Metabolism	ESI positive	0.557 (0.225)	2.045 (1.197)	1.821 (1.384)	0.0057	0.7342
pantothenate (Vitamin B5)	Cofactors and Vitamins	Pantothenate and CoA Metabolism	ESI positive	0.776 (0.285)	1.441 (0.421)	1.358 (0.539)	0.0012	0.7346
propionylglycine (C3)	Lipid	Fatty Acid Metabolism (also BCAA Metabolism)	LC/MS Polar	0.628 (1.017)	2.958 (5.755)	4.756 (5.972)	0.509	0.7403
nervonate (24:1n9)*	Lipid	Long Chain Monounsaturated Fatty Acid	ESI negative	2.154 (3.797)	2.502 (2.999)	2.546 (2.918)	0.5852	0.7403
N-methylpipecolate	Xenobiotics	Bacterial/Fungal	ESI positive	0.016 (0.015)	0.020 (0.015)	0.028 (0.027)	0.4974	0.7444
indolepropionate	Amino Acid	Tryptophan Metabolism	ESI negative	0.046 (0.029)	0.093 (0.073)	0.266 (0.439)	0.1376	0.749
linoleoyl-linoleoyl-glycerol (18:2/18:2) [2]*	Lipid	Diacylglycerol	ESI positive	0.049 (0.061)	0.020 (0.023)	0.019 (0.027)	0.658	0.7506
phytosphingosine	Lipid	Sphingolipid Synthesis	ESI positive	0.164 (0.072)	2.393 (1.655)	2.621 (0.956)	0.0001	0.751
stigmasterol	Lipid	Sterol	ESI positive	1.251 (0.172)	0.933 (0.207)	0.901 (0.195)	0.0027	0.7516
malonate	Lipid	Fatty Acid Synthesis	LC/MS Polar	0.295 (0.136)	0.917 (0.466)	0.983 (0.340)	0.0037	0.7548
N-carbamoylsarcosine	Amino Acid	Creatine Metabolism	ESI positive	0.256 (0.000)	0.423 (0.383)	0.378 (0.322)	0.2271	0.7561
stearoyl-linoleoyl-glycerol (18:0/18:2) [2]*	Lipid	Diacylglycerol	ESI positive	0.076 (0.057)	0.115 (0.159)	0.072 (0.041)	0.9517	0.7561
taurine	Amino Acid	Methionine, Cysteine, SAM and Taurine Metabolism	ESI positive	2.158 (1.298)	8.772 (3.853)	9.604 (3.535)	0.0001	0.7577
palmitoleoylcarnitine (C16:1)*	Lipid	Fatty Acid Metabolism (Acyl Carnitine, Monounsaturated)	ESI positive	0.084 (0.051)	1.929 (1.367)	1.543 (1.159)	0.0003	0.7577
3-(4-hydroxyphenyl)propionate	Xenobiotics	Benzoate Metabolism	ESI negative	0.146 (0.100)	1.563 (1.083)	2.499 (2.955)	0.0004	0.7577
glycerophosphoglycerol	Lipid	Glycerolipid Metabolism	LC/MS Polar	0.129 (0.079)	2.360 (3.369)	3.647 (3.747)	0.0004	0.7577
3-hydroxydecanoate	Lipid	Fatty Acid, Monohydroxy	ESI negative	0.315 (0.142)	1.798 (1.452)	1.756 (0.766)	0.0005	0.7577
mevalonate	Lipid	Mevalonate Metabolism	LC/MS Polar	0.186 (0.089)	0.709 (0.525)	0.819 (0.597)	0.0006	0.7577
(12 or 13)-methylmyristate (a15:0 or i15:0)	Lipid	Fatty Acid, Branched	ESI negative	1.894 (0.943)	0.630 (0.692)	0.424 (0.379)	0.0028	0.7577
4-hydroxyphenylpyruvate	Amino Acid	Tyrosine Metabolism	ESI negative	1.005 (0.294)	3.230 (2.787)	2.935 (2.027)	0.0028	0.7577
gamma-glutamylalanine	Peptide	Gamma-glutamyl Amino Acid	ESI positive	0.355 (0.229)	2.311 (1.401)	2.436 (0.994)	0.0029	0.7577
1-stearoyl-2-linoleoyl-GPE (18:0/18:2)*	Lipid	Phosphatidylethanolamine (PE)	ESI positive	0.749 (0.532)	5.058 (7.519)	1.962 (0.850)	0.004	0.7577
5-methyluridine (ribothymidine)	Nucleotide	Pyrimidine Metabolism, Uracil containing	ESI negative	1.785 (1.127)	0.872 (1.306)	0.531 (0.507)	0.0106	0.7577
creatinine	Amino Acid	Creatine Metabolism	ESI positive	1.005 (0.621)	2.906 (2.594)	3.133 (2.117)	0.0106	0.7577
N-acetylasparagine	Amino Acid	Alanine and Aspartate Metabolism	ESI positive	1.101 (0.293)	2.160 (1.694)	2.347 (1.876)	0.0625	0.7577
pyridoxamine	Cofactors and Vitamins	Vitamin B6 Metabolism	ESI positive	0.821 (0.293)	0.714 (0.309)	0.642 (0.318)	0.1903	0.7577
1-pentadecanoylglycerol (15:0)	Lipid	Monoacylglycerol	ESI negative	0.898 (0.438)	0.978 (1.092)	0.821 (0.685)	0.3865	0.7577
1-oleoylglycerol (18:1)	Lipid	Monoacylglycerol	ESI negative	1.281 (2.040)	0.985 (0.744)	1.378 (2.245)	0.4894	0.7577
alpha-ketoglutaramate*	Amino Acid	Glutamate Metabolism	LC/MS Polar	1.319 (0.645)	1.680 (1.129)	1.229 (0.531)	0.5457	0.7577
nicotinamide riboside	Cofactors and Vitamins	Nicotinate and Nicotinamide Metabolism	ESI positive	2.482 (1.325)	3.623 (3.267)	4.086 (3.412)	0.6048	0.7577
linoleoyl-linoleoyl-glycerol (18:2/18:2) [1]*	Lipid	Diacylglycerol	ESI positive	0.097 (0.145)	0.030 (0.033)	0.026 (0.029)	0.7234	0.7577
myristoleate (14:1n5)	Lipid	Long Chain Monounsaturated Fatty Acid	ESI negative	3.733 (5.509)	2.623 (2.362)	3.072 (4.590)	0.8633	0.7577
3-formylindole	Xenobiotics	Food Component/Plant	ESI negative	0.377 (0.118)	0.682 (0.237)	0.725 (0.312)	0.0032	0.7587
N-formylphenylalanine	Amino Acid	Tyrosine Metabolism	ESI negative	0.608 (0.434)	1.069 (0.497)	0.990 (0.547)	0.1083	0.7663
leucine	Amino Acid	Leucine, Isoleucine and Valine Metabolism	ESI positive	0.827 (0.306)	3.442 (1.643)	3.620 (0.608)	0.0013	0.7703
cysteine s-sulfate	Amino Acid	Methionine, Cysteine, SAM and Taurine Metabolism	ESI negative	2.059 (1.551)	23.793 (20.883)	26.958 (21.565)	0.0142	0.7712
alanylleucine	Peptide	Dipeptide	ESI positive	1.064 (0.552)	2.449 (1.807)	2.717 (1.803)	0.0539	0.7733
cadaverine	Amino Acid	Lysine Metabolism	ESI positive	0.025 (0.000)	0.296 (0.452)	0.171 (0.313)	0.1105	0.7858
isovalerate (C5)	Amino Acid	Leucine, Isoleucine and Valine Metabolism	ESI negative	0.318 (0.128)	0.545 (0.219)	0.582 (0.322)	0.0165	0.7885
6-beta-hydroxylithocholate	Lipid	Secondary Bile Acid Metabolism	ESI negative	0.612 (0.250)	0.269 (0.212)	0.242 (0.178)	0.0064	0.7909
pentadecanoate (15:0)	Lipid	Long Chain Saturated Fatty Acid	ESI negative	1.289 (0.764)	0.332 (0.279)	0.291 (0.207)	0.0056	0.7911
2-hydroxyarachidate*	Lipid	Fatty Acid, Monohydroxy	ESI negative	4.068 (2.712)	0.849 (0.443)	0.783 (0.549)	0.0073	0.7912
glycine	Amino Acid	Glycine, Serine and Threonine Metabolism	ESI positive	0.451 (0.166)	2.295 (1.019)	2.174 (0.712)	0.0006	0.7939
hexadecasphinganine (d16:0)*	Lipid	Sphingolipid Synthesis	ESI positive	2.689 (0.747)	0.639 (0.165)	0.611 (0.265)	< 0.0001	0.7989
N-acetylneuraminate	Carbohydrate	Aminosugar Metabolism	ESI positive	1.280 (0.272)	6.914 (1.951)	6.588 (3.073)	< 0.0001	0.799
1-stearoyl-GPG (18:0)	Lipid	Lysophospholipid	ESI negative	1.817 (1.003)	2.092 (1.010)	1.921 (1.721)	0.57	0.806
arachidate (20:0)	Lipid	Long Chain Saturated Fatty Acid	ESI negative	1.875 (1.090)	1.209 (0.685)	1.110 (0.905)	0.1402	0.8072
dCMP	Nucleotide	Pyrimidine Metabolism, Cytidine containing	ESI positive	0.762 (0.545)	0.193 (0.357)	0.040 (0.061)	0.0118	0.8155
sulfate*	Xenobiotics	Chemical	ESI negative	0.215 (0.097)	1.900 (0.790)	1.998 (0.867)	0.0002	0.8174
citrulline	Amino Acid	Urea cycle; Arginine and Proline Metabolism	ESI positive	1.061 (0.165)	2.745 (1.067)	2.849 (0.522)	0.0014	0.8178
1-ribosyl-imidazoleacetate*	Amino Acid	Histidine Metabolism	ESI positive	0.055 (0.000)	1.160 (1.139)	1.290 (1.094)	0.0196	0.8203
lactate	Carbohydrate	Glycolysis, Gluconeogenesis, and Pyruvate Metabolism	LC/MS Polar	0.291 (0.163)	1.992 (1.182)	2.144 (1.544)	0.0025	0.8263
N-acetylputrescine	Amino Acid	Polyamine Metabolism	ESI positive	0.016 (0.009)	2.742 (2.571)	2.489 (1.913)	0.013	0.8311
5-methylcytidine	Nucleotide	Pyrimidine Metabolism, Cytidine containing	ESI negative	0.779 (0.495)	2.108 (2.662)	0.951 (0.470)	0.2423	0.8311
5,6-dihydrouridine	Nucleotide	Pyrimidine Metabolism, Uracil containing	ESI negative	1.172 (0.381)	0.897 (0.637)	0.963 (0.582)	0.2815	0.834
argininate*	Amino Acid	Urea cycle; Arginine and Proline Metabolism	ESI positive	0.162 (0.187)	1.970 (1.907)	2.172 (1.844)	0.0013	0.8342
retinol (Vitamin A)	Cofactors and Vitamins	Vitamin A Metabolism	ESI positive	0.466 (0.000)	0.569 (0.238)	0.598 (0.238)	0.2301	0.8348
3-hydroxylaurate	Lipid	Fatty Acid, Monohydroxy	ESI negative	0.474 (0.075)	1.352 (0.414)	1.274 (0.542)	0.0004	0.8371
butyrylcarnitine (C4)	Lipid	Fatty Acid Metabolism (also BCAA Metabolism)	ESI positive	0.076 (0.077)	2.649 (2.676)	1.650 (0.740)	0.0004	0.8371
glycerophosphoserine*	Lipid	Phospholipid Metabolism	ESI positive	0.046 (0.034)	0.905 (1.498)	1.457 (1.468)	0.0004	0.8371
3-hydroxyhexanoate	Lipid	Fatty Acid, Monohydroxy	ESI negative	0.346 (0.121)	2.027 (1.488)	1.784 (1.221)	0.0005	0.8371
phenylacetate	Amino Acid	Phenylalanine Metabolism	ESI negative	0.240 (0.114)	0.829 (0.580)	0.727 (0.437)	0.0012	0.8371
2'-O-methylcytidine	Nucleotide	Pyrimidine Metabolism, Cytidine containing	ESI positive	1.359 (0.933)	2.663 (0.931)	2.837 (1.602)	0.0091	0.8371
pseudouridine	Nucleotide	Pyrimidine Metabolism, Uracil containing	ESI negative	1.855 (0.725)	1.042 (0.955)	0.743 (0.411)	0.0244	0.8371
cis-urocanate	Amino Acid	Histidine Metabolism	ESI positive	1.069 (0.439)	1.903 (0.998)	1.937 (1.759)	0.0424	0.8371
beta-sitosterol	Lipid	Sterol	ESI positive	0.933 (0.114)	0.817 (0.140)	0.764 (0.106)	0.0716	0.8371
1-stearoyl-2-oleoyl-GPE (18:0/18:1)	Lipid	Phosphatidylethanolamine (PE)	ESI positive	1.800 (1.633)	6.727 (10.089)	2.133 (0.712)	0.1359	0.8371
3-hydroxybehenate*	Lipid	Fatty Acid, Monohydroxy	ESI negative	3.744 (2.825)	3.249 (2.537)	3.542 (3.155)	0.701	0.8371
gamma-CEHC	Cofactors and Vitamins	Tocopherol Metabolism	ESI negative	2.023 (1.361)	2.183 (2.131)	2.230 (1.624)	1	0.8371
2-hydroxynervonate*	Lipid	Fatty Acid, Monohydroxy	ESI negative	5.744 (4.041)	0.743 (0.453)	0.693 (0.512)	0.0059	0.8379
3-hydroxyoctanoate	Lipid	Fatty Acid, Monohydroxy	ESI negative	0.420 (0.255)	0.734 (0.464)	0.692 (0.303)	0.0731	0.8392
alpha-tocopherol	Cofactors and Vitamins	Tocopherol Metabolism	ESI positive	1.358 (0.187)	1.498 (0.343)	1.470 (0.210)	0.2988	0.8499
threonine	Amino Acid	Glycine, Serine and Threonine Metabolism	ESI positive	0.548 (0.219)	2.513 (1.460)	2.400 (0.679)	0.0036	0.8528
2-palmitoyl-galactosylglycerol (16:0)*	Lipid	Galactosyl Glycerolipids	ESI negative	0.565 (0.451)	0.154 (0.065)	0.304 (0.452)	0.0159	0.854
vanillin	Xenobiotics	Food Component/Plant	ESI negative	0.393 (0.279)	0.245 (0.159)	0.322 (0.342)	0.1799	0.854
1-linolenoylglycerol (18:3)	Lipid	Monoacylglycerol	ESI negative	0.471 (0.596)	0.202 (0.073)	0.292 (0.304)	0.2254	0.854
palmitoleoyl-linoleoyl-glycerol (16:1/18:2) [1]*	Lipid	Diacylglycerol	ESI positive	1.025 (1.527)	0.212 (0.234)	0.338 (0.541)	0.2254	0.854
palmitoyl-oleoyl-glycerol (16:0/18:1) [2]*	Lipid	Diacylglycerol	ESI positive	0.272 (0.290)	0.211 (0.311)	0.328 (0.585)	0.3961	0.854
oleoyl-oleoyl-glycerol (18:1/18:1) [1]*	Lipid	Diacylglycerol	ESI positive	0.598 (0.450)	0.379 (0.022)	0.387 (0.041)	0.4968	0.854
5-methylthioadenosine (MTA)	Amino Acid	Polyamine Metabolism	ESI positive	0.295 (0.414)	0.910 (0.689)	0.855 (0.442)	0.0421	0.8559
1-myristoylglycerol (14:0)	Lipid	Monoacylglycerol	ESI negative	0.800 (0.517)	1.353 (0.710)	1.416 (0.681)	0.0774	0.8596
1-linoleoyl-GPC (18:2)	Lipid	Lysophospholipid	ESI positive	0.189 (0.097)	1.141 (0.752)	1.083 (0.545)	0.0003	0.8676
2-hydroxylignocerate*	Lipid	Fatty Acid, Monohydroxy	LC/MS Polar	2.639 (1.259)	1.028 (1.760)	0.324 (0.181)	0.0563	0.8729
1-oleoyl-GPG (18:1)*	Lipid	Lysophospholipid	ESI negative	0.338 (0.307)	1.250 (1.227)	1.276 (1.161)	0.0345	0.8738
N-acetylphenylalanine	Amino Acid	Phenylalanine Metabolism	ESI negative	0.273 (0.026)	6.800 (2.934)	7.030 (2.739)	0.0003	0.8751
diacylglycerol (16:1/18:2 [2], 16:0/18:3 [1])*	Lipid	Diacylglycerol	ESI positive	1.466 (2.048)	0.443 (0.830)	0.865 (1.983)	0.1597	0.8766
linoleoyl-linolenoyl-glycerol (18:2/18:3) [1]*	Lipid	Diacylglycerol	ESI positive	0.085 (0.111)	0.029 (0.018)	0.033 (0.030)	0.1917	0.8766
erythrose	Xenobiotics	Food Component/Plant	ESI negative	0.508 (0.315)	1.873 (0.826)	1.932 (0.741)	0.0009	0.8845
N2-acetyl,N6,N6-dimethyllysine	Amino Acid	Lysine Metabolism	ESI positive	0.130 (0.000)	1.315 (0.637)	1.361 (0.600)	0.0005	0.8858
methylmalonate (MMA)	Lipid	Fatty Acid Metabolism (also BCAA Metabolism)	LC/MS Polar	0.138 (0.089)	0.825 (0.508)	0.790 (0.443)	0.0008	0.886
hydantoin-5-propionate	Amino Acid	Histidine Metabolism	LC/MS Polar	0.094 (0.000)	1.610 (0.969)	1.540 (0.954)	0.0016	0.8868
gamma-glutamyltyrosine	Peptide	Gamma-glutamyl Amino Acid	ESI positive	0.426 (0.286)	6.164 (4.305)	5.899 (2.733)	0.0005	0.8895
malonylcarnitine	Lipid	Fatty Acid Synthesis	ESI positive	1.484 (0.372)	1.501 (0.892)	1.448 (0.501)	0.9574	0.8912
gamma-glutamylcitrulline*	Peptide	Gamma-glutamyl Amino Acid	ESI positive	0.429 (0.385)	5.421 (4.106)	5.185 (2.101)	0.0065	0.892
N-methylproline	Amino Acid	Urea cycle; Arginine and Proline Metabolism	ESI positive	0.049 (0.024)	0.020 (0.024)	0.015 (0.013)	0.0118	0.8976
N-acetyltryptophan	Amino Acid	Tryptophan Metabolism	ESI negative	0.161 (0.000)	5.261 (3.463)	5.472 (2.964)	0.0022	0.8995
(N(1) + N(8))-acetylspermidine	Amino Acid	Polyamine Metabolism	ESI positive	0.067 (0.033)	0.831 (0.501)	0.803 (0.339)	0.0018	0.9013
glucarate 1,4-lactone	Carbohydrate	Disaccharides and Oligosaccharides	ESI negative	0.274 (0.208)	1.245 (0.758)	1.286 (0.566)	0.0008	0.9052
mevalonolactone	Lipid	Mevalonate Metabolism	ESI positive	0.589 (0.316)	1.973 (1.169)	2.056 (1.565)	0.0132	0.9053
carboxyethyl-GABA	Amino Acid	Glutamate Metabolism	ESI positive	0.803 (0.294)	0.199 (0.090)	0.195 (0.056)	< 0.0001	0.9084
phenol sulfate	Amino Acid	Tyrosine Metabolism	ESI negative	3.047 (3.054)	1.686 (2.961)	0.366 (0.260)	0.288	0.912
ursodeoxycholate sulfate (2)	Lipid	Secondary Bile Acid Metabolism	ESI negative	0.118 (0.000)	1.504 (1.694)	1.220 (0.908)	0.0397	0.9155
xanthosine	Nucleotide	Purine Metabolism, (Hypo)Xanthine/Inosine containing	ESI negative	1.110 (0.584)	1.503 (2.008)	0.835 (0.418)	0.5961	0.9156
serine	Amino Acid	Glycine, Serine and Threonine Metabolism	ESI positive	0.635 (0.229)	3.200 (1.385)	3.136 (0.832)	0.0005	0.916
4-hydroxybenzoate	Xenobiotics	Benzoate Metabolism	ESI negative	0.648 (0.281)	0.986 (0.358)	1.010 (0.541)	0.0407	0.9164
fumarate	Energy	TCA Cycle	LC/MS Polar	0.441 (0.246)	1.847 (1.344)	1.844 (1.317)	0.0002	0.9182
glycerophosphoethanolamine	Lipid	Phospholipid Metabolism	ESI positive	0.711 (0.494)	3.062 (2.030)	2.694 (1.234)	0.0003	0.9182
N6-acetyllysine	Amino Acid	Lysine Metabolism	ESI negative	0.631 (0.311)	3.771 (5.555)	2.057 (0.847)	0.0005	0.9182
gamma-glutamyl-epsilon-lysine	Peptide	Gamma-glutamyl Amino Acid	ESI positive	1.244 (0.847)	13.509 (7.458)	19.391 (21.097)	0.0011	0.9182
alpha-ketobutyrate	Amino Acid	Methionine, Cysteine, SAM and Taurine Metabolism	LC/MS Polar	0.361 (0.246)	2.070 (2.734)	1.391 (1.055)	0.0014	0.9182
2-hydroxybehenate	Lipid	Fatty Acid, Monohydroxy	ESI negative	4.241 (3.080)	0.944 (0.757)	0.776 (0.511)	0.0106	0.9182
carotene diol (1)	Cofactors and Vitamins	Vitamin A Metabolism	ESI positive	0.842 (0.061)	0.751 (0.120)	0.786 (0.145)	0.0625	0.9182
ribose	Carbohydrate	Pentose Metabolism	LC/MS Polar	1.191 (0.393)	1.006 (0.448)	1.007 (0.414)	0.1903	0.9182
pelargonate (9:0)	Lipid	Medium Chain Fatty Acid	ESI negative	1.019 (0.394)	0.835 (0.250)	0.816 (0.173)	0.3536	0.9182
5-dodecenoate (12:1n7)	Lipid	Medium Chain Fatty Acid	ESI negative	3.940 (5.499)	6.214 (5.982)	6.319 (8.155)	0.3865	0.9182
hexadecadienoate (16:2n6)	Lipid	Long Chain Polyunsaturated Fatty Acid (n3 and n6)	ESI negative	2.648 (4.387)	1.037 (0.947)	0.845 (0.797)	0.4894	0.9182
glycerol 3-phosphate	Lipid	Glycerolipid Metabolism	ESI positive	0.723 (0.475)	1.334 (2.028)	0.477 (0.247)	0.6048	0.9182
oleoyl ethanolamide	Lipid	Endocannabinoid	ESI positive	0.518 (0.307)	0.654 (0.427)	0.531 (0.225)	0.6048	0.9182
alpha-ketoglutarate	Energy	TCA Cycle	LC/MS Polar	1.659 (1.166)	1.718 (1.100)	2.296 (1.991)	0.7962	0.9182
N-acetylglucosamine/N-acetylgalactosamine	Carbohydrate	Aminosugar Metabolism	ESI positive	0.915 (0.247)	3.048 (0.814)	2.978 (0.924)	< 0.0001	0.9182
N-acetylproline	Amino Acid	Urea cycle; Arginine and Proline Metabolism	ESI positive	0.312 (0.175)	0.684 (0.288)	0.666 (0.402)	0.0043	0.9183
campesterol	Lipid	Sterol	ESI positive	1.007 (0.177)	0.901 (0.204)	0.890 (0.197)	0.2564	0.9184
phenylpyruvate	Amino Acid	Phenylalanine Metabolism	LC/MS Polar	1.274 (0.500)	2.965 (1.595)	2.886 (1.763)	0.0132	0.9266
2-oxindole-3-acetate	Xenobiotics	Food Component/Plant	ESI negative	0.698 (0.131)	0.425 (0.195)	0.416 (0.205)	0.0056	0.9268
valine	Amino Acid	Leucine, Isoleucine and Valine Metabolism	ESI positive	0.689 (0.292)	3.614 (2.050)	3.679 (0.755)	0.0026	0.9317
2'-O-methyluridine	Nucleotide	Pyrimidine Metabolism, Uracil containing	ESI negative	0.561 (0.209)	1.468 (0.859)	1.436 (0.706)	0.0036	0.9367
(3'-5')-adenylyladenosine*	Nucleotide	Dinucleotide	ESI negative	2.763 (1.270)	0.305 (0.199)	0.241 (0.008)	0.0004	0.9446
putrescine	Amino Acid	Polyamine Metabolism	ESI positive	0.015 (0.000)	3.033 (2.942)	2.940 (2.148)	0.0002	0.9451
10-hydroxystearate	Lipid	Fatty Acid, Monohydroxy	ESI negative	0.090 (0.061)	0.339 (0.260)	0.330 (0.255)	0.0019	0.9488
3-methylglutaconate	Amino Acid	Leucine, Isoleucine and Valine Metabolism	LC/MS Polar	0.065 (0.000)	0.097 (0.039)	0.117 (0.091)	0.0427	0.9515
glutamine	Amino Acid	Glutamate Metabolism	ESI positive	0.854 (0.345)	5.621 (2.971)	5.687 (1.427)	0.0013	0.9578
2'-deoxyinosine	Nucleotide	Purine Metabolism, (Hypo)Xanthine/Inosine containing	ESI negative	1.406 (0.542)	0.482 (0.631)	0.445 (0.441)	0.0056	0.9578
laurylcarnitine (C12)	Lipid	Fatty Acid Metabolism (Acyl Carnitine, Medium Chain)	ESI positive	0.143 (0.000)	1.356 (1.221)	1.330 (0.951)	0.0176	0.9635
myristoleoylcarnitine (C14:1)*	Lipid	Fatty Acid Metabolism (Acyl Carnitine, Monounsaturated)	ESI positive	0.101 (0.000)	3.529 (3.304)	3.461 (3.109)	0.0144	0.9673
isohyodeoxycholate	Lipid	Secondary Bile Acid Metabolism	ESI negative	0.874 (0.213)	0.111 (0.030)	0.110 (0.058)	< 0.0001	0.9673
gamma-glutamylglutamine	Peptide	Gamma-glutamyl Amino Acid	ESI positive	0.582 (0.490)	10.770 (7.803)	10.908 (4.931)	0.0044	0.9681
1-palmitoylglycerol (16:0)	Lipid	Monoacylglycerol	ESI negative	1.090 (0.938)	2.265 (1.665)	2.305 (2.361)	0.0939	0.9692
glycerate	Carbohydrate	Glycolysis, Gluconeogenesis, and Pyruvate Metabolism	LC/MS Polar	0.922 (0.351)	1.598 (0.395)	1.608 (0.787)	0.0014	0.9749
quinolinate	Cofactors and Vitamins	Nicotinate and Nicotinamide Metabolism	ESI positive	1.316 (0.949)	2.034 (1.103)	2.050 (0.792)	0.1579	0.9762
aspartate	Amino Acid	Alanine and Aspartate Metabolism	ESI positive	0.380 (0.146)	1.662 (0.852)	1.675 (0.834)	0.0019	0.9774
gamma-glutamylglycine	Peptide	Gamma-glutamyl Amino Acid	ESI positive	0.147 (0.092)	3.536 (2.919)	3.500 (2.350)	0.0003	0.9791
galactosylglycerol	Lipid	Galactosyl Glycerolipids	LC/MS Polar	0.590 (0.490)	1.036 (0.788)	1.028 (0.507)	0.1903	0.983
N-acetylthreonine	Amino Acid	Glycine, Serine and Threonine Metabolism	LC/MS Polar	0.360 (0.117)	1.313 (0.976)	1.322 (0.887)	0.0191	0.984
ethylmalonate	Amino Acid	Leucine, Isoleucine and Valine Metabolism	LC/MS Polar	0.155 (0.061)	1.987 (1.218)	1.983 (1.181)	0.002	0.9951
phenylalanylglycine	Peptide	Dipeptide	ESI positive	1.244 (0.639)	4.305 (2.491)	4.300 (0.932)	0.006	0.9958
N-acetylkynurenine (2)	Amino Acid	Tryptophan Metabolism	ESI positive	0.073 (0.000)	0.946 (0.682)	0.947 (0.279)	0.0049	0.9985
N2-acetyllysine	Amino Acid	Lysine Metabolism	LC/MS Polar	0.171 (0.092)	1.104 (0.534)	1.619 (1.562)	0.0001	1
betaine	Amino Acid	Glycine, Serine and Threonine Metabolism	ESI positive	0.842 (0.445)	5.022 (3.944)	3.868 (1.692)	0.0001	1
N6-methyllysine	Amino Acid	Lysine Metabolism	ESI positive	0.302 (0.097)	1.505 (1.185)	1.210 (0.427)	0.0001	1
1-palmitoyl-GPE (16:0)	Lipid	Lysophospholipid	ESI positive	0.192 (0.107)	0.721 (0.386)	0.800 (0.556)	0.0001	1
glycerophosphoinositol*	Lipid	Phospholipid Metabolism	LC/MS Polar	0.071 (0.012)	2.905 (3.925)	2.832 (2.519)	0.0003	1
isovalerylcarnitine (C5)	Amino Acid	Leucine, Isoleucine and Valine Metabolism	ESI positive	0.186 (0.196)	4.446 (3.649)	3.624 (1.951)	0.0003	1
palmitoylcholine	Lipid	Fatty Acid Metabolism (Acyl Choline)	ESI positive	0.527 (0.232)	1.692 (1.130)	1.510 (0.936)	0.0027	1
N-acetylhistamine	Amino Acid	Histidine Metabolism	ESI positive	0.206 (0.422)	2.301 (3.360)	1.460 (1.125)	0.0036	1
octadecenedioylcarnitine (C18:1-DC)*	Lipid	Fatty Acid Metabolism (Acyl Carnitine, Dicarboxylate)	ESI positive	0.088 (0.000)	1.044 (0.757)	0.971 (0.267)	0.0053	1
1-palmitoyl-2-docosahexaenoyl-GPE (16:0/22:6)*	Lipid	Phosphatidylethanolamine (PE)	ESI positive	0.482 (0.750)	2.074 (2.347)	1.097 (0.549)	0.0057	1
dihydroferulate	Xenobiotics	Food Component/Plant	ESI negative	0.199 (0.000)	0.913 (0.593)	0.988 (0.767)	0.0068	1
1-methylhistamine	Amino Acid	Histidine Metabolism	ESI positive	0.111 (0.000)	2.535 (2.183)	2.523 (2.305)	0.0104	1
fucose	Carbohydrate	Aminosugar Metabolism	ESI positive	0.558 (0.179)	1.513 (1.367)	1.090 (0.464)	0.0244	1
hexanoylcarnitine (C6)	Lipid	Fatty Acid Metabolism (Acyl Carnitine, Medium Chain)	ESI positive	0.605 (0.206)	2.664 (3.677)	1.736 (1.236)	0.0257	1
2,8-quinolinediol	Xenobiotics	Food Component/Plant	ESI positive	0.028 (0.044)	0.007 (0.007)	0.005 (0.003)	0.0429	1
2-palmitoylglycerol (16:0)	Lipid	Monoacylglycerol	ESI negative	0.720 (0.589)	1.790 (1.296)	2.791 (3.101)	0.0561	1
5-hydroxyhexanoate	Lipid	Fatty Acid, Monohydroxy	ESI negative	0.144 (0.144)	0.065 (0.064)	0.050 (0.029)	0.0898	1
gulonate*	Cofactors and Vitamins	Ascorbate and Aldarate Metabolism	LC/MS Polar	0.248 (0.000)	15.033 (29.828)	16.888 (29.745)	0.1753	1
gentisate	Amino Acid	Tyrosine Metabolism	LC/MS Polar	0.029 (0.000)	0.031 (0.005)	0.035 (0.011)	0.2733	1
2-keto-3-deoxy-gluconate	Xenobiotics	Food Component/Plant	LC/MS Polar	0.200 (0.147)	0.373 (0.384)	0.480 (0.481)	0.2973	1
3-methylglutarate/2-methylglutarate	Lipid	Fatty Acid, Dicarboxylate	LC/MS Polar	0.069 (0.008)	0.078 (0.024)	0.084 (0.032)	0.3713	1
8-hydroxyoctanoate	Lipid	Fatty Acid, Monohydroxy	ESI negative	0.086 (0.033)	0.103 (0.057)	0.094 (0.034)	0.4968	1
linoleoyl-linolenoyl-glycerol (18:2/18:3) [2]*	Lipid	Diacylglycerol	ESI positive	0.052 (0.064)	0.025 (0.030)	0.034 (0.056)	0.6896	1
hexadecatrienoate (16:3n3)	Lipid	Long Chain Polyunsaturated Fatty Acid (n3 and n6)	ESI negative	2.371 (3.681)	1.169 (0.991)	1.059 (1.200)	0.7304	1
arabinose	Carbohydrate	Pentose Metabolism	LC/MS Polar	0.010 (0.010)	0.008 (0.007)	0.013 (0.020)	0.92	1
caproate (6:0)	Lipid	Medium Chain Fatty Acid	ESI negative	0.426 (0.506)	0.404 (0.468)	0.374 (0.444)	0.9314	1
3-methyl-2-oxobutyrate	Amino Acid	Leucine, Isoleucine and Valine Metabolism	LC/MS Polar	1.463 (0.650)	1.674 (1.331)	2.059 (1.819)	1	1
L-urobilin	Cofactors and Vitamins	Hemoglobin and Porphyrin Metabolism	ESI negative	0.699 (0.246)	0.029 (0.000)		0.0001
(3'-5')-adenylylcytidine	Nucleotide	Dinucleotide	ESI negative	1.498 (0.869)	0.315 (0.000)		0.0035
(3'-5')-cytidylylguanosine	Nucleotide	Dinucleotide	ESI negative	0.695 (0.350)	0.268 (0.000)		0.0064
uridine-2',3'-cyclic monophosphate	Nucleotide	Pyrimidine Metabolism, Uracil containing	ESI negative	1.346 (1.191)	0.052 (0.000)		0.0116
(3'-5')-guanylyluridine	Nucleotide	Dinucleotide	ESI negative	1.154 (0.701)	0.409 (0.000)		0.0129
(3'-5')-uridylylguanosine	Nucleotide	Dinucleotide	ESI negative	0.364 (0.185)	0.174 (0.000)		0.0151
N,N-dimethylalanine	Amino Acid	Alanine and Aspartate Metabolism	ESI positive	0.101 (0.073)	0.028 (0.000)		0.0177
(3'-5')-uridylyluridine	Nucleotide	Dinucleotide	ESI negative	0.497 (0.315)	0.202 (0.000)		0.0226
guanosine-2',3'-cyclic monophosphate	Nucleotide	Purine Metabolism, Guanine containing	ESI negative	2.414 (2.867)	0.073 (0.000)		0.04
cytidine 2',3'-cyclic monophosphate	Nucleotide	Pyrimidine Metabolism, Cytidine containing	ESI negative	2.416 (3.312)	0.171 (0.000)		0.0765
tryptamine	Amino Acid	Tryptophan Metabolism	ESI positive	0.003 (0.002)	0.001 (0.000)		0.0938
acetylphosphate	Energy	Oxidative Phosphorylation	LC/MS Polar	0.028 (0.021)	0.015 (0.000)		0.1024
adenosine-2',3'-cyclic monophosphate	Nucleotide	Purine Metabolism, Adenine containing	ESI negative	1.062 (1.496)	0.152 (0.000)		0.1055
uridine 3'-monophosphate (3'-UMP)	Nucleotide	Pyrimidine Metabolism, Uracil containing	ESI negative	0.086 (0.062)	0.053 (0.000)		0.1492
cytidine 2' or 3'-monophosphate (2' or 3'-CMP)	Nucleotide	Pyrimidine Metabolism, Cytidine containing	ESI positive	0.079 (0.119)	0.020 (0.000)		0.1712
(3'-5')-cytidylyladenosine	Nucleotide	Dinucleotide	ESI negative	0.642 (0.124)	0.582 (0.000)		0.1862
1-methylguanidine	Amino Acid	Guanidino and Acetamido Metabolism	ESI positive	0.339 (0.065)	0.310 (0.000)		0.2172
3'-AMP	Nucleotide	Purine Metabolism, Adenine containing	ESI negative	0.195 (0.285)	0.080 (0.000)		0.2606
guanosine 3'-monophosphate (3'-GMP)	Nucleotide	Purine Metabolism, Guanine containing	ESI negative	0.289 (0.268)	0.189 (0.000)		0.2937
trehalose	Carbohydrate	Disaccharides and Oligosaccharides	LC/MS Polar	0.005 (0.002)	0.005 (0.000)		0.3466
nicotinic acid mononucleotide (NaMN)	Cofactors and Vitamins	Nicotinate and Nicotinamide Metabolism	ESI positive	0.017 (0.004)	0.015 (0.000)		0.3466
