# Supplementary material for: Multi-omics analysis detected multiple pathways by which pomegranate punicalagin exerts its biological effects in modulating host–microbiota interactions in murine colitis models
Source: Royal Society of Chemistry journal article supplement (doi:10.1039/d3fo00286a), 2023-01-01
Supplement: d3fo00286a3.xlsx [file d3fo00286a3.xlsx]

## Sheet: RNAseq_mouse colon
Gene_ID	log2Fold_CM vs NC	FDR_CM vs NC	log2Fold_PA vs CM	FDR_PA vs CM	Gene name	Gene description	Gene start (bp)	Gene end (bp)	Transcript count
ENSMUSG00000114688	0.321972	0.936879	39.4184	2.98647e-85	Gm47381	predicted gene, 47381 [Source:MGI Symbol;Acc:MGI:6096300]	91259376	91274954	1
ENSMUSG00000025002	1.63888	0.328548	9.74652	1.17438e-16	Cyp2c55	cytochrome P450, family 2, subfamily c, polypeptide 55 [Source:MGI Symbol;Acc:MGI:1919332]	39007019	39042693	1
ENSMUSG00000054417	5.06127	0.438282	30	4.41706e-10	Cyp3a44	cytochrome P450, family 3, subfamily a, polypeptide 44 [Source:MGI Symbol;Acc:MGI:2449818]	145773983	145805874	1
ENSMUSG00000027875	0.777475	0.328885	3.45632	1.41736e-08	Hmgcs2	3-hydroxy-3-methylglutaryl-Coenzyme A synthase 2 [Source:MGI Symbol;Acc:MGI:101939]	98280435	98310738	2
ENSMUSG00000028289	0.669971	0.185615	2.27592	2.08434e-08	Epha7	Eph receptor A7 [Source:MGI Symbol;Acc:MGI:95276]	28813131	28967499	8
ENSMUSG00000040812	0.754182	0.420464	4.41796	2.23809e-08	Agbl2	ATP/GTP binding protein-like 2 [Source:MGI Symbol;Acc:MGI:2443254]	90782727	90834437	8
ENSMUSG00000000296	0.580021	0.241104	2.25042	2.23809e-08	Tpd52l1	tumor protein D52-like 1 [Source:MGI Symbol;Acc:MGI:1298386]	31332376	31445958	5
ENSMUSG00000001943	-0.0382562	0.961838	2.5934	2.30062e-08	Vsig2	V-set and immunoglobulin domain containing 2 [Source:MGI Symbol;Acc:MGI:1928009]	37539255	37544205	6
ENSMUSG00000107705	-32.0422	1.0811e-05	-35.2336	2.30062e-08	Gm45062	predicted gene 45062 [Source:MGI Symbol;Acc:MGI:5753638]	8259450	8597480	1
ENSMUSG00000069372	0.699191	0.134019	2.06589	4.78863e-08	Ctxn3	cortexin 3 [Source:MGI Symbol;Acc:MGI:3642816]	57468516	57478133	3
ENSMUSG00000029369	0.201775	0.653357	1.70073	5.1112e-08	Afm	afamin [Source:MGI Symbol;Acc:MGI:2429409]	90518932	90553543	2
ENSMUSG00000055730	1.11403	0.0951361	2.94854	5.61627e-08	Ces2a	carboxylesterase 2A [Source:MGI Symbol;Acc:MGI:2142491]	104734003	104741634	4
ENSMUSG00000033308	0.261489	0.779925	3.22469	6.33572e-08	Dpyd	dihydropyrimidine dehydrogenase [Source:MGI Symbol;Acc:MGI:2139667]	118562129	119432924	6
ENSMUSG00000028307	0.0908615	0.898197	2.2493	6.33572e-08	Aldob	aldolase B, fructose-bisphosphate [Source:MGI Symbol;Acc:MGI:87995]	49535995	49549546	3
ENSMUSG00000023247	0.606458	0.544005	3.84265	7.51041e-08	Guca2a	guanylate cyclase activator 2a (guanylin) [Source:MGI Symbol;Acc:MGI:102738]	119637704	119639471	1
ENSMUSG00000021587	0.446352	0.38959	2.13958	7.55161e-08	Pcsk1	proprotein convertase subtilisin/kexin type 1 [Source:MGI Symbol;Acc:MGI:97511]	75089826	75134861	3
ENSMUSG00000029669	0.0106007	0.980008	1.17114	7.66493e-08	Tspan12	tetraspanin 12 [Source:MGI Symbol;Acc:MGI:1889818]	21771395	21852515	6
ENSMUSG00000053199	0.868698	0.234778	3.11253	8.13831e-08	Arhgap20	Rho GTPase activating protein 20 [Source:MGI Symbol;Acc:MGI:2445175]	51765337	51853856	6
ENSMUSG00000053279	0.820473	0.0441234	1.76517	1.16657e-07	Aldh1a1	aldehyde dehydrogenase family 1, subfamily A1 [Source:MGI Symbol;Acc:MGI:1353450]	20492715	20643465	6
ENSMUSG00000031173	0.763173	0.376248	3.52623	1.34736e-07	Otc	ornithine transcarbamylase [Source:MGI Symbol;Acc:MGI:97448]	10252305	10321024	2
ENSMUSG00000079440	1.33109	0.0447218	2.85596	1.49214e-07	Alpi	alkaline phosphatase, intestinal [Source:MGI Symbol;Acc:MGI:1924018]	87098002	87101606	1
ENSMUSG00000033578	0.442452	0.670552	4.3107	1.49214e-07	Tmem35a	transmembrane protein 35A [Source:MGI Symbol;Acc:MGI:1914814]	134295225	134305969	1
ENSMUSG00000038583	1.02347	0.172539	3.12759	1.60184e-07	Pln	phospholamban [Source:MGI Symbol;Acc:MGI:97622]	53337667	53345987	6
ENSMUSG00000050103	0.504381	0.382547	2.29324	1.76481e-07	Agmo	alkylglycerol monooxygenase [Source:MGI Symbol;Acc:MGI:2442495]	37241641	37582202	6
ENSMUSG00000030711	0.220987	0.836584	3.39872	1.86654e-07	Sult1a1	sulfotransferase family 1A, phenol-preferring, member 1 [Source:MGI Symbol;Acc:MGI:102896]	126672865	126676432	3
ENSMUSG00000037953	0.604602	0.323376	2.53004	1.86654e-07	A4gnt	alpha-1,4-N-acetylglucosaminyltransferase [Source:MGI Symbol;Acc:MGI:2143261]	99612502	99622367	1
ENSMUSG00000044860	0.73552	0.366815	3.17704	1.96037e-07	Gm1123	predicted gene 1123 [Source:MGI Symbol;Acc:MGI:2685969]	99006790	99035715	1
ENSMUSG00000056258	0.519257	0.248791	2.06957	2.1971e-07	Kcnq3	potassium voltage-gated channel, subfamily Q, member 3 [Source:MGI Symbol;Acc:MGI:1336181]	65986387	66286642	3
ENSMUSG00000067231	2.15547	0.0779475	5.16849	2.5106e-07	Cyp2c65	cytochrome P450, family 2, subfamily c, polypeptide 65 [Source:MGI Symbol;Acc:MGI:1919553]	39061015	39093944	1
ENSMUSG00000024084	0.441691	0.365458	1.87495	3.62444e-07	Qpct	glutaminyl-peptide cyclotransferase (glutaminyl cyclase) [Source:MGI Symbol;Acc:MGI:1917786]	79051906	79090378	3
ENSMUSG00000050097	0.837435	0.0716732	1.93722	3.62444e-07	Ces2b	carboxyesterase 2B [Source:MGI Symbol;Acc:MGI:2448547]	104831572	104840093	2
ENSMUSG00000033717	0.767846	0.194764	2.36854	3.85534e-07	Adra2a	adrenergic receptor, alpha 2a [Source:MGI Symbol;Acc:MGI:87934]	54044151	54048982	2
ENSMUSG00000024049	0.406459	0.392258	1.80469	3.85534e-07	Myom1	myomesin 1 [Source:MGI Symbol;Acc:MGI:1341430]	71002633	71126856	9
ENSMUSG00000021565	0.772876	0.292126	3.03272	3.85534e-07	Slc6a19	solute carrier family 6 (neurotransmitter transporter), member 19 [Source:MGI Symbol;Acc:MGI:1921588]	73679745	73704865	7
ENSMUSG00000032719	0.869591	0.32334	3.97672	3.85534e-07	Sbspon	somatomedin B and thrombospondin, type 1 domain containing [Source:MGI Symbol;Acc:MGI:2684952]	15853862	15892722	1
ENSMUSG00000032303	0.515954	0.18346	1.69126	4.41132e-07	Chrna3	cholinergic receptor, nicotinic, alpha polypeptide 3 [Source:MGI Symbol;Acc:MGI:87887]	55010111	55026562	2
ENSMUSG00000029335	0.125084	0.868857	2.29448	5.34688e-07	Bmp3	bone morphogenetic protein 3 [Source:MGI Symbol;Acc:MGI:88179]	98854415	98884396	3
ENSMUSG00000038591	1.18706	0.10842	3.01984	5.34688e-07	Colec10	collectin sub-family member 10 [Source:MGI Symbol;Acc:MGI:3606482]	54410774	54466358	1
ENSMUSG00000056487	-0.833202	0.439449	4.06249	5.37461e-07	Mettl7a2	methyltransferase like 7A2 [Source:MGI Symbol;Acc:MGI:3026615]	100353200	100361840	2
ENSMUSG00000040584	-0.0176647	0.986134	2.63501	6.35195e-07	Abcb1a	ATP-binding cassette, sub-family B (MDR/TAP), member 1A [Source:MGI Symbol;Acc:MGI:97570]	8660077	8748575	4
ENSMUSG00000026678	0.690089	0.125195	1.79727	6.35195e-07	Rgs5	regulator of G-protein signaling 5 [Source:MGI Symbol;Acc:MGI:1098434]	169655501	169695813	2
ENSMUSG00000023057	1.38884	0.0466578	2.84164	6.68143e-07	Fabp2	fatty acid binding protein 2, intestinal [Source:MGI Symbol;Acc:MGI:95478]	122895072	122899506	1
ENSMUSG00000031647	0.246531	0.742564	2.42192	7.36222e-07	Mfap3l	microfibrillar-associated protein 3-like [Source:MGI Symbol;Acc:MGI:1918556]	60632827	60676729	4
ENSMUSG00000037872	0.551601	0.216002	1.8667	8.1227e-07	Ackr1	atypical chemokine receptor 1 (Duffy blood group) [Source:MGI Symbol;Acc:MGI:1097689]	173331886	173333750	3
ENSMUSG00000067297	0.982236	0.0936287	2.36139	8.1227e-07	Ifit1bl2	interferon induced protein with tetratricopeptide repeats 1B like 2 [Source:MGI Symbol;Acc:MGI:2148249]	34617049	34640743	1
ENSMUSG00000094091	0.753284	0.440531	3.61443	8.1227e-07	Gm21885	predicted gene, 21885 [Source:MGI Symbol;Acc:MGI:5434049]	94281873	94286253	2
ENSMUSG00000031725	1.07593	0.0117388	1.78041	8.1227e-07	Ces1f	carboxylesterase 1F [Source:MGI Symbol;Acc:MGI:2142687]	93256236	93279747	6
ENSMUSG00000074004	0.954084	0.24348	3.19055	8.1227e-07	B3gnt6	UDP-GlcNAc:betaGal beta-1,3-N-acetylglucosaminyltransferase 6 (core 3 synthase) [Source:MGI Symbol;Acc:MGI:3039603]	98192417	98199481	1
ENSMUSG00000032816	0.195407	0.74142	1.89109	8.49626e-07	Igdcc4	immunoglobulin superfamily, DCC subclass, member 4 [Source:MGI Symbol;Acc:MGI:1858497]	65101486	65137940	7
ENSMUSG00000029273	1.02226	0.127535	2.6438	8.49626e-07	Sult1d1	sulfotransferase family 1D, member 1 [Source:MGI Symbol;Acc:MGI:1926341]	87554645	87569027	2
ENSMUSG00000033721	0.434932	0.174423	1.25647	8.49626e-07	Vav3	vav 3 oncogene [Source:MGI Symbol;Acc:MGI:1888518]	109340653	109685698	6
ENSMUSG00000023073	1.04438	0.0831014	2.42597	8.49626e-07	Slc10a2	solute carrier family 10, member 2 [Source:MGI Symbol;Acc:MGI:1201406]	5083219	5105351	1
ENSMUSG00000055430	0.374289	0.352777	1.5475	8.51408e-07	Nap1l5	nucleosome assembly protein 1-like 5 [Source:MGI Symbol;Acc:MGI:1923555]	58905233	58907076	2
ENSMUSG00000021573	0.188296	0.863269	3.23094	9.1492e-07	Tppp	tubulin polymerization promoting protein [Source:MGI Symbol;Acc:MGI:1920198]	74009407	74035753	2
ENSMUSG00000032028	0.203408	0.79455	2.39448	9.39653e-07	Nxpe2	neurexophilin and PC-esterase domain family, member 2 [Source:MGI Symbol;Acc:MGI:1925502]	48318006	48353454	5
ENSMUSG00000035864	0.307156	0.511232	1.73465	9.39653e-07	Syt1	synaptotagmin I [Source:MGI Symbol;Acc:MGI:99667]	108497650	109010982	6
ENSMUSG00000000690	1.06112	0.0255704	1.97501	9.39653e-07	Hoxb6	homeobox B6 [Source:MGI Symbol;Acc:MGI:96187]	96292476	96301569	2
ENSMUSG00000020080	0.90616	0.081722	2.08069	9.39653e-07	Hkdc1	hexokinase domain containing 1 [Source:MGI Symbol;Acc:MGI:2384910]	62383137	62422491	4
ENSMUSG00000042155	0.552794	0.133945	1.44683	9.62264e-07	Klhl23	kelch-like 23 [Source:MGI Symbol;Acc:MGI:2683536]	69821944	69836651	3
ENSMUSG00000042834	0.296159	0.518633	1.64111	1.00859e-06	Nrep	neuronal regeneration related protein [Source:MGI Symbol;Acc:MGI:99444]	33437019	33464029	4
ENSMUSG00000009394	-0.0635623	0.930862	2.0384	1.16921e-06	Syn2	synapsin II [Source:MGI Symbol;Acc:MGI:103020]	115134902	115282006	7
ENSMUSG00000026620	0.140647	0.792039	1.67657	1.16921e-06	Mark1	MAP/microtubule affinity regulating kinase 1 [Source:MGI Symbol;Acc:MGI:2664902]	184896789	184999570	2
ENSMUSG00000054640	0.501439	0.246648	1.62849	1.16921e-06	Slc8a1	solute carrier family 8 (sodium/calcium exchanger), member 1 [Source:MGI Symbol;Acc:MGI:107956]	81373105	81738377	6
ENSMUSG00000029309	0.157439	0.79711	1.8501	1.2337e-06	Sparcl1	SPARC-like 1 [Source:MGI Symbol;Acc:MGI:108110]	104079111	104113733	2
ENSMUSG00000040046	-0.279063	0.694991	2.32011	1.2337e-06	Tph1	tryptophan hydroxylase 1 [Source:MGI Symbol;Acc:MGI:98796]	46644641	46672537	8
ENSMUSG00000051111	0.0239852	0.976261	2.11457	1.24879e-06	Sv2c	synaptic vesicle glycoprotein 2c [Source:MGI Symbol;Acc:MGI:1922459]	95954594	96132577	4
ENSMUSG00000036815	0.889495	0.174398	2.52791	1.24879e-06	Dpp10	dipeptidylpeptidase 10 [Source:MGI Symbol;Acc:MGI:2442409]	123321471	124045559	4
ENSMUSG00000043154	0.326471	0.381541	1.36294	1.24879e-06	Ppp2r3a	protein phosphatase 2, regulatory subunit B'', alpha [Source:MGI Symbol;Acc:MGI:2442104]	101105084	101251795	7
ENSMUSG00000022383	0.107248	0.890219	2.28295	1.24879e-06	Ppara	peroxisome proliferator activated receptor alpha [Source:MGI Symbol;Acc:MGI:104740]	85734983	85802819	6
ENSMUSG00000003348	-0.304011	0.0725637	-0.663095	1.30008e-06	Mob3a	MOB kinase activator 3A [Source:MGI Symbol;Acc:MGI:3050117]	80685253	80701977	4
ENSMUSG00000027870	0.0644121	0.951258	2.85309	1.41736e-06	Hao2	hydroxyacid oxidase 2 [Source:MGI Symbol;Acc:MGI:96012]	98874521	98893239	1
ENSMUSG00000027350	-0.476863	0.405863	2.05624	1.41736e-06	Chgb	chromogranin B [Source:MGI Symbol;Acc:MGI:88395]	132781278	132795079	1
ENSMUSG00000054252	-0.188941	0.821047	2.4728	1.43007e-06	Fgfr3	fibroblast growth factor receptor 3 [Source:MGI Symbol;Acc:MGI:95524]	33721674	33737068	17
ENSMUSG00000095457	0.264063	0.633354	1.82963	1.43007e-06	Gm8989	predicted gene 8989 [Source:MGI Symbol;Acc:MGI:3704114]	106323414	106330688	1
ENSMUSG00000052572	0.368065	0.372084	1.54234	1.43007e-06	Dlg2	discs large MAGUK scaffold protein 2 [Source:MGI Symbol;Acc:MGI:1344351]	90476672	92449247	17
ENSMUSG00000049107	0.391121	0.586399	2.69049	1.43007e-06	Ntf3	neurotrophin 3 [Source:MGI Symbol;Acc:MGI:97380]	126101412	126166910	3
ENSMUSG00000047216	0.672637	0.268484	2.31133	1.43166e-06	Cdh19	cadherin 19, type 2 [Source:MGI Symbol;Acc:MGI:3588198]	110888326	110977584	2
ENSMUSG00000029201	0.471439	0.17492	1.31388	1.4748e-06	Ugdh	UDP-glucose dehydrogenase [Source:MGI Symbol;Acc:MGI:1306785]	65413221	65435949	4
ENSMUSG00000041592	0.875423	0.0755362	2.00292	1.47497e-06	Sdk2	sidekick cell adhesion molecule 2 [Source:MGI Symbol;Acc:MGI:2443847]	113776374	114067046	6
ENSMUSG00000054999	1.34115	0.0578757	2.83319	1.53308e-06	Naaladl1	N-acetylated alpha-linked acidic dipeptidase-like 1 [Source:MGI Symbol;Acc:MGI:2685810]	6105782	6115792	1
ENSMUSG00000037852	0.409486	0.369693	1.63262	1.75769e-06	Cpe	carboxypeptidase E [Source:MGI Symbol;Acc:MGI:101932]	64592542	64693054	4
ENSMUSG00000042439	0.358284	0.4394	1.65992	1.90215e-06	Zfp532	zinc finger protein 532 [Source:MGI Symbol;Acc:MGI:3036282]	65579912	65689443	27
ENSMUSG00000000416	0.463756	0.274341	1.55684	1.97917e-06	Cttnbp2	cortactin binding protein 2 [Source:MGI Symbol;Acc:MGI:1353467]	18366478	18514843	9
ENSMUSG00000045903	0.691637	0.121009	1.76363	1.97917e-06	Npas4	neuronal PAS domain protein 4 [Source:MGI Symbol;Acc:MGI:2664186]	4984355	4990316	3
ENSMUSG00000000889	-0.0307312	0.970576	2.65325	2.04842e-06	Dbh	dopamine beta hydroxylase [Source:MGI Symbol;Acc:MGI:94864]	27165233	27183200	2
ENSMUSG00000030465	0.403467	0.294791	1.39681	2.04842e-06	Psd3	pleckstrin and Sec7 domain containing 3 [Source:MGI Symbol;Acc:MGI:1918215]	67689082	68212027	15
ENSMUSG00000030525	0.343437	0.584965	4.14806	2.04842e-06	Chrna7	cholinergic receptor, nicotinic, alpha polypeptide 7 [Source:MGI Symbol;Acc:MGI:99779]	63098692	63212569	2
ENSMUSG00000031613	0.503669	0.517554	2.64473	2.13179e-06	Hpgd	hydroxyprostaglandin dehydrogenase 15 (NAD) [Source:MGI Symbol;Acc:MGI:108085]	56294585	56321043	1
ENSMUSG00000024747	0.407705	0.395737	1.71038	2.23076e-06	Aldh1a7	aldehyde dehydrogenase family 1, subfamily A7 [Source:MGI Symbol;Acc:MGI:1347050]	20692953	20727562	1
ENSMUSG00000087291	0.705196	0.199301	2.02992	2.26614e-06	Gm11946	predicted gene 11946 [Source:MGI Symbol;Acc:MGI:3650071]	3530157	3536856	2
ENSMUSG00000037989	0.379525	0.29942	1.32643	2.26614e-06	Wnk2	WNK lysine deficient protein kinase 2 [Source:MGI Symbol;Acc:MGI:1922857]	49036303	49148014	11
ENSMUSG00000112129	0.0360006	0.97835	3.63186	2.26614e-06	Pbld1	phenazine biosynthesis-like protein domain containing 1 [Source:MGI Symbol;Acc:MGI:1915621]	63060162	63077962	7
ENSMUSG00000056870	0.567849	0.191518	1.63415	2.43609e-06	Gulp1	GULP, engulfment adaptor PTB domain containing 1 [Source:MGI Symbol;Acc:MGI:1920407]	44551511	44796838	6
ENSMUSG00000021390	0.748049	0.159386	1.97732	2.59186e-06	Ogn	osteoglycin [Source:MGI Symbol;Acc:MGI:109278]	49608046	49624501	1
ENSMUSG00000026614	-0.497146	0.787141	5.67769	2.59186e-06	Slc30a10	solute carrier family 30, member 10 [Source:MGI Symbol;Acc:MGI:2685058]	185454848	185468762	1
ENSMUSG00000035566	0.568524	0.212976	1.92047	2.59186e-06	Pcdh17	protocadherin 17 [Source:MGI Symbol;Acc:MGI:2684924]	84443563	84539002	2
ENSMUSG00000033061	0.097452	0.922369	2.70819	2.66363e-06	Resp18	regulated endocrine-specific protein 18 [Source:MGI Symbol;Acc:MGI:1098222]	75272199	75278415	4
ENSMUSG00000028024	0.503429	0.28058	1.7005	2.75124e-06	Enpep	glutamyl aminopeptidase [Source:MGI Symbol;Acc:MGI:106645]	129269175	129332720	5
ENSMUSG00000037362	0.0446699	0.971431	3.10867	2.8997e-06	Ccn3	cellular communication network factor 3 [Source:MGI Symbol;Acc:MGI:109185]	54745702	54754039	1
ENSMUSG00000027792	0.476305	0.397886	1.96372	2.90433e-06	Bche	butyrylcholinesterase [Source:MGI Symbol;Acc:MGI:894278]	73635808	73708415	4
ENSMUSG00000049691	0.89571	0.119792	2.1882	3.02261e-06	Nkx3-2	NK3 homeobox 2 [Source:MGI Symbol;Acc:MGI:108015]	41761483	41764501	1
ENSMUSG00000116940	0.229843	0.592336	1.48512	3.02261e-06	Gm7450	predicted gene 7450 [Source:MGI Symbol;Acc:MGI:3647897]	15575999	15577151	1
ENSMUSG00000062410	0.634648	0.375508	2.50199	3.042e-06	Hsd3b3	hydroxy-delta-5-steroid dehydrogenase, 3 beta- and steroid delta-isomerase 3 [Source:MGI Symbol;Acc:MGI:96235]	98741523	98763127	6
ENSMUSG00000034528	0.204984	0.675332	1.53509	3.34423e-06	Hsd17b13	hydroxysteroid (17-beta) dehydrogenase 13 [Source:MGI Symbol;Acc:MGI:2140804]	103955440	103977410	3
ENSMUSG00000007279	0.254994	0.668546	1.93048	3.35656e-06	Scube2	signal peptide, CUB domain, EGF-like 2 [Source:MGI Symbol;Acc:MGI:1928765]	109798676	109865679	5
ENSMUSG00000022415	0.348349	0.387265	1.47257	3.43478e-06	Syngr1	synaptogyrin 1 [Source:MGI Symbol;Acc:MGI:1328323]	80091334	80119501	4
ENSMUSG00000074194	0.211359	0.655038	1.53608	3.53411e-06	Zfp791	zinc finger protein 791 [Source:MGI Symbol;Acc:MGI:3648473]	85108553	85123095	2
ENSMUSG00000055632	0.623623	0.268783	2.00085	3.69693e-06	Hmcn2	hemicentin 2 [Source:MGI Symbol;Acc:MGI:2677838]	31314415	31460738	6
ENSMUSG00000053414	-0.234155	0.673394	1.75214	3.81011e-06	Hunk	hormonally upregulated Neu-associated kinase [Source:MGI Symbol;Acc:MGI:1347352]	90386013	90499553	3
ENSMUSG00000022619	0.482142	0.331285	1.85132	3.81317e-06	Mapk8ip2	mitogen-activated protein kinase 8 interacting protein 2 [Source:MGI Symbol;Acc:MGI:1926555]	89453913	89464468	2
ENSMUSG00000050666	-0.0809731	0.869381	1.46076	3.86976e-06	Vstm4	V-set and transmembrane domain containing 4 [Source:MGI Symbol;Acc:MGI:2444633]	32856756	32939491	1
ENSMUSG00000035811	0.17677	0.688203	1.36591	4.0143e-06	Ugt2b35	UDP glucuronosyltransferase 2 family, polypeptide B35 [Source:MGI Symbol;Acc:MGI:3576100]	87000860	87013275	1
ENSMUSG00000040412	-0.209426	0.712996	1.71692	4.86964e-06	5330417C22Rik	RIKEN cDNA 5330417C22 gene [Source:MGI Symbol;Acc:MGI:1923930]	108455694	108536536	7
ENSMUSG00000079243	0.546824	0.655052	5.16393	4.90813e-06	Xirp1	xin actin-binding repeat containing 1 [Source:MGI Symbol;Acc:MGI:1333878]	120013755	120023598	2
ENSMUSG00000032226	0.520971	0.169306	1.36757	5.1884e-06	Gcnt3	glucosaminyl (N-acetyl) transferase 3, mucin type [Source:MGI Symbol;Acc:MGI:1919327]	70031496	70038088	1
ENSMUSG00000086389	0.406986	0.808147	4.79296	5.24508e-06	Gm15998	predicted gene 15998 [Source:MGI Symbol;Acc:MGI:3802094]	89315439	89318907	1
ENSMUSG00000063730	0.797145	0.317499	2.76924	5.24508e-06	Hsd3b2	hydroxy-delta-5-steroid dehydrogenase, 3 beta- and steroid delta-isomerase 2 [Source:MGI Symbol;Acc:MGI:96234]	98709255	98724543	3
ENSMUSG00000048728	0.808973	0.129727	2.25802	5.29753e-06	Zfp454	zinc finger protein 454 [Source:MGI Symbol;Acc:MGI:2679253]	50872720	50887651	6
ENSMUSG00000050587	0.774758	0.2008	2.52598	5.8288e-06	Lrrc4c	leucine rich repeat containing 4C [Source:MGI Symbol;Acc:MGI:2442636]	96318169	97631666	4
ENSMUSG00000079055	0.444735	0.556061	2.6284	5.84358e-06	Slc8a3	solute carrier family 8 (sodium/calcium exchanger), member 3 [Source:MGI Symbol;Acc:MGI:107976]	81197915	81333180	5
ENSMUSG00000085881	0.267389	0.758717	2.56108	5.96383e-06	Gm15912	predicted gene 15912 [Source:MGI Symbol;Acc:MGI:3801895]	74008009	74009354	2
ENSMUSG00000030701	0.297912	0.518674	1.53133	6.21726e-06	Plekhb1	pleckstrin homology domain containing, family B (evectins) member 1 [Source:MGI Symbol;Acc:MGI:1351469]	100642892	100662414	12
ENSMUSG00000020072	-0.00132005	0.998526	1.61048	6.21726e-06	Pbld2	phenazine biosynthesis-like protein domain containing 2 [Source:MGI Symbol;Acc:MGI:1914557]	63024315	63058813	3
ENSMUSG00000039661	0.307758	0.570006	1.86247	6.21726e-06	Dusp26	dual specificity phosphatase 26 (putative) [Source:MGI Symbol;Acc:MGI:1914209]	31089471	31097047	5
ENSMUSG00000022010	0.122605	0.814682	1.4562	6.22202e-06	Tsc22d1	TSC22 domain family, member 1 [Source:MGI Symbol;Acc:MGI:109127]	76414961	76507765	16
ENSMUSG00000022270	0.0874646	0.904326	1.89755	6.22202e-06	Retreg1	reticulophagy regulator 1 [Source:MGI Symbol;Acc:MGI:1913520]	25843180	25973687	8
ENSMUSG00000090223	0.638259	0.38906	2.54489	6.22202e-06	Pcp4	Purkinje cell protein 4 [Source:MGI Symbol;Acc:MGI:97509]	96467606	96525793	4
ENSMUSG00000063903	0.42196	0.524305	2.15196	6.22202e-06	Klk1	kallikrein 1 [Source:MGI Symbol;Acc:MGI:102850]	44225360	44229618	3
ENSMUSG00000086513	-0.027629	0.959108	1.3439	6.22202e-06	9130208D14Rik	RIKEN cDNA 9130208D14 gene [Source:MGI Symbol;Acc:MGI:1924950]	105824223	105831515	1
ENSMUSG00000051910	0.431786	0.568102	2.45293	6.52796e-06	Sox6	SRY (sex determining region Y)-box 6 [Source:MGI Symbol;Acc:MGI:98368]	115470872	116038796	16
ENSMUSG00000029445	-0.445202	0.480934	2.08393	6.72379e-06	Hpd	4-hydroxyphenylpyruvic acid dioxygenase [Source:MGI Symbol;Acc:MGI:96213]	123171807	123182727	6
ENSMUSG00000073608	-0.378728	0.70056	2.97705	6.72379e-06	Gal3st2c	galactose-3-O-sulfotransferase 2C [Source:MGI Symbol;Acc:MGI:3646771]	93990509	94017147	1
ENSMUSG00000034157	0.179592	0.728328	1.51059	6.72379e-06	Cipc	CLOCK interacting protein, circadian [Source:MGI Symbol;Acc:MGI:1919185]	86947043	86965362	11
ENSMUSG00000066512	0.40142	0.542247	2.12658	6.72379e-06	Klk1b5	kallikrein 1-related peptidase b5 [Source:MGI Symbol;Acc:MGI:892020]	44215945	44220703	1
ENSMUSG00000023074	0.26806	0.254609	0.827301	6.72379e-06	Mospd1	motile sperm domain containing 1 [Source:MGI Symbol;Acc:MGI:1917630]	53344598	53370502	3
ENSMUSG00000027761	0.910989	0.107838	2.06823	6.72379e-06	Aadac	arylacetamide deacetylase [Source:MGI Symbol;Acc:MGI:1915008]	60025717	60040160	3
ENSMUSG00000019785	0.903236	0.155255	2.36704	6.72379e-06	Clvs2	clavesin 2 [Source:MGI Symbol;Acc:MGI:2443223]	33512286	33624769	4
ENSMUSG00000079157	0.991117	0.122796	2.43689	6.72379e-06	Fam155a	family with sequence similarity 155, member A [Source:MGI Symbol;Acc:MGI:2142765]	9205902	9771161	6
ENSMUSG00000110397	1.12234	0.104329	2.58023	6.91971e-06	Gm45540	predicted gene 45540 [Source:MGI Symbol;Acc:MGI:5791376]	56311304	56314909	1
ENSMUSG00000023122	0.539653	0.509955	2.64919	7.32659e-06	Sult1c2	sulfotransferase family, cytosolic, 1C, member 2 [Source:MGI Symbol;Acc:MGI:1916333]	53829637	53846339	1
ENSMUSG00000022016	0.136067	0.455814	0.602147	7.33254e-06	Akap11	A kinase (PRKA) anchor protein 11 [Source:MGI Symbol;Acc:MGI:2684060]	78492246	78536808	5
ENSMUSG00000031748	0.363648	0.413341	1.49254	7.36784e-06	Gnao1	guanine nucleotide binding protein, alpha O [Source:MGI Symbol;Acc:MGI:95775]	93809966	93969388	12
ENSMUSG00000047394	0.279669	0.839744	4.0023	7.36784e-06	Odf3b	outer dense fiber of sperm tails 3B [Source:MGI Symbol;Acc:MGI:1917363]	89377449	89379282	7
ENSMUSG00000021876	0.381033	0.28287	1.21608	7.47905e-06	Rnase4	ribonuclease, RNase A family 4 [Source:MGI Symbol;Acc:MGI:1926217]	51091077	51106151	2
ENSMUSG00000042359	-0.126959	0.839477	1.7317	7.85258e-06	Osbpl6	oxysterol binding protein-like 6 [Source:MGI Symbol;Acc:MGI:2139014]	76406508	76600647	8
ENSMUSG00000057897	-0.0671856	0.898858	1.42978	7.85258e-06	Camk2b	calcium/calmodulin-dependent protein kinase II, beta [Source:MGI Symbol;Acc:MGI:88257]	5969644	6066362	15
ENSMUSG00000019775	0.428235	0.614586	2.63576	8.81492e-06	Rgs17	regulator of G-protein signaling 17 [Source:MGI Symbol;Acc:MGI:1927469]	5825663	5922400	4
ENSMUSG00000058057	-0.863726	0.363443	3.31421	9.00148e-06	Mettl7a3	methyltransferase like 7A3 [Source:MGI Symbol;Acc:MGI:3710670]	100334929	100340375	1
ENSMUSG00000085004	0.560819	0.731695	4.83066	9.00148e-06	5430427M07Rik	RIKEN cDNA 5430427M07 gene [Source:MGI Symbol;Acc:MGI:1918599]	91045848	91079907	2
ENSMUSG00000028005	0.2241	0.601782	1.33661	9.00148e-06	Gucy1b1	guanylate cyclase 1, soluble, beta 1 [Source:MGI Symbol;Acc:MGI:1860604]	82032006	82074689	4
ENSMUSG00000028039	0.352762	0.736984	3.09388	9.00148e-06	Efna3	ephrin A3 [Source:MGI Symbol;Acc:MGI:106644]	89313899	89322965	3
ENSMUSG00000032766	0.462832	0.065496	0.912212	9.03227e-06	Gng11	guanine nucleotide binding protein (G protein), gamma 11 [Source:MGI Symbol;Acc:MGI:1913316]	4003904	4008445	1
ENSMUSG00000032372	0.207385	0.72037	1.69101	9.03227e-06	Plscr2	phospholipid scramblase 2 [Source:MGI Symbol;Acc:MGI:1270860]	92275602	92297752	5
ENSMUSG00000021589	0.444514	0.100268	0.988438	9.03227e-06	Rhobtb3	Rho-related BTB domain containing 3 [Source:MGI Symbol;Acc:MGI:1920546]	75869537	75943925	5
ENSMUSG00000039197	0.235886	0.409424	0.94423	9.03227e-06	Adk	adenosine kinase [Source:MGI Symbol;Acc:MGI:87930]	21052574	21448569	10
ENSMUSG00000032181	0.0646396	0.925686	1.82264	9.03227e-06	Scg3	secretogranin III [Source:MGI Symbol;Acc:MGI:103032]	75643189	75684056	7
ENSMUSG00000055421	0.348783	0.649311	3.8514	9.03227e-06	Pcdh9	protocadherin 9 [Source:MGI Symbol;Acc:MGI:1306801]	93013410	93890679	8
ENSMUSG00000029173	0.157172	0.0972043	0.344485	9.03227e-06	Sepsecs	Sep (O-phosphoserine) tRNA:Sec (selenocysteine) tRNA synthase [Source:MGI Symbol;Acc:MGI:1098791]	52640087	52669708	5
ENSMUSG00000022144	0.41605	0.373777	1.62965	9.03227e-06	Gdnf	glial cell line derived neurotrophic factor [Source:MGI Symbol;Acc:MGI:107430]	7810846	7837575	1
ENSMUSG00000045871	0.54622	0.35524	2.02277	9.06601e-06	Slitrk6	SLIT and NTRK-like family, member 6 [Source:MGI Symbol;Acc:MGI:2443198]	110748580	110755149	1
ENSMUSG00000027603	0.109987	0.813946	1.38944	9.06601e-06	Ggt7	gamma-glutamyltransferase 7 [Source:MGI Symbol;Acc:MGI:1913385]	155490379	155518237	5
ENSMUSG00000052920	0.544755	0.175229	1.43451	9.30356e-06	Prkg1	protein kinase, cGMP-dependent, type I [Source:MGI Symbol;Acc:MGI:108174]	30564489	31765033	7
ENSMUSG00000032377	0.502373	0.387256	1.93297	9.31455e-06	Plscr4	phospholipid scramblase 4 [Source:MGI Symbol;Acc:MGI:2143267]	92457373	92492456	2
ENSMUSG00000032854	1.40313	0.0650126	2.96965	1.03268e-05	Ugt8a	UDP galactosyltransferase 8A [Source:MGI Symbol;Acc:MGI:109522]	125865271	125938619	3
ENSMUSG00000021337	0.317596	0.629783	2.03948	1.0537e-05	Scgn	secretagogin, EF-hand calcium binding protein [Source:MGI Symbol;Acc:MGI:2384873]	23953456	23991214	3
ENSMUSG00000068196	0.621338	0.209464	1.70557	1.07122e-05	Col8a1	collagen, type VIII, alpha 1 [Source:MGI Symbol;Acc:MGI:88463]	57624258	57754737	2
ENSMUSG00000022261	0.175577	0.619034	1.07324	1.15635e-05	Sdc2	syndecan 2 [Source:MGI Symbol;Acc:MGI:1349165]	32920723	33034935	1
ENSMUSG00000022340	0.0594445	0.937823	1.90967	1.17275e-05	Sybu	syntabulin (syntaxin-interacting) [Source:MGI Symbol;Acc:MGI:2442392]	44671856	44788063	9
ENSMUSG00000021194	-0.617048	0.299326	1.99134	1.17881e-05	Chga	chromogranin A [Source:MGI Symbol;Acc:MGI:88394]	102554969	102565028	3
ENSMUSG00000038115	0.599674	0.549818	3.53774	1.17881e-05	Ano2	anoctamin 2 [Source:MGI Symbol;Acc:MGI:2387214]	125690419	126040126	6
ENSMUSG00000019278	0.329996	0.669103	2.27752	1.17894e-05	Dpep1	dipeptidase 1 [Source:MGI Symbol;Acc:MGI:94917]	123186242	123201812	3
ENSMUSG00000090175	-0.180464	0.898585	3.68223	1.17894e-05	Ugt1a9	UDP glucuronosyltransferase 1 family, polypeptide A9 [Source:MGI Symbol;Acc:MGI:3576092]	88070800	88218997	1
ENSMUSG00000021313	0.410228	0.363443	1.49843	1.17894e-05	Ryr2	ryanodine receptor 2, cardiac [Source:MGI Symbol;Acc:MGI:99685]	11553102	12106945	14
ENSMUSG00000020102	0.474104	0.255626	1.43392	1.18168e-05	Slc16a7	solute carrier family 16 (monocarboxylic acid transporters), member 7 [Source:MGI Symbol;Acc:MGI:1330284]	125219270	125389465	6
ENSMUSG00000025196	0.892954	0.101076	1.97732	1.18586e-05	Cpn1	carboxypeptidase N, polypeptide 1 [Source:MGI Symbol;Acc:MGI:2135874]	43956307	43986556	2
ENSMUSG00000001986	0.518487	0.157508	1.30968	1.21543e-05	Gria3	glutamate receptor, ionotropic, AMPA3 (alpha 3) [Source:MGI Symbol;Acc:MGI:95810]	41400854	41678601	9
ENSMUSG00000033174	0.400644	0.224164	1.12399	1.23624e-05	Mgll	monoglyceride lipase [Source:MGI Symbol;Acc:MGI:1346042]	88724412	88828360	10
ENSMUSG00000038602	0.321221	0.666462	2.36368	1.23624e-05	Slc35f1	solute carrier family 35, member F1 [Source:MGI Symbol;Acc:MGI:2139810]	52690533	53111622	1
ENSMUSG00000024304	0.151223	0.766599	1.52496	1.23624e-05	Cdh2	cadherin 2 [Source:MGI Symbol;Acc:MGI:88355]	16588877	16809246	3
ENSMUSG00000027962	0.00101775	0.997569	-0.732677	1.23624e-05	Vcam1	vascular cell adhesion molecule 1 [Source:MGI Symbol;Acc:MGI:98926]	116109949	116129688	4
ENSMUSG00000074882	0.03079	0.983917	3.45084	1.25772e-05	Cyp2c68	cytochrome P450, family 2, subfamily c, polypeptide 68 [Source:MGI Symbol;Acc:MGI:3612287]	39688834	39741054	1
ENSMUSG00000054630	2.9595	0.0380858	5.22178	1.25772e-05	Ugt2b5	UDP glucuronosyltransferase 2 family, polypeptide B5 [Source:MGI Symbol;Acc:MGI:98900]	87124960	87140318	1
ENSMUSG00000057074	1.33211	0.045583	2.41876	1.28205e-05	Ces1g	carboxylesterase 1G [Source:MGI Symbol;Acc:MGI:88378]	93302369	93337308	1
ENSMUSG00000044156	0.137976	0.831276	1.72619	1.28438e-05	Hepacam2	HEPACAM family member 2 [Source:MGI Symbol;Acc:MGI:2141520]	3457096	3498298	5
ENSMUSG00000020620	0.0784773	0.918553	1.97306	1.30837e-05	Abca8b	ATP-binding cassette, sub-family A (ABC1), member 8b [Source:MGI Symbol;Acc:MGI:1351668]	109932190	109995845	2
ENSMUSG00000060206	0.361663	0.409199	1.44362	1.40925e-05	Zfp462	zinc finger protein 462 [Source:MGI Symbol;Acc:MGI:107690]	54945048	55083563	4
ENSMUSG00000057378	0.670872	0.110552	1.48429	1.43425e-05	Ryr3	ryanodine receptor 3 [Source:MGI Symbol;Acc:MGI:99684]	112631355	113217096	12
ENSMUSG00000005268	1.07674	0.123563	2.47192	1.44973e-05	Prlr	prolactin receptor [Source:MGI Symbol;Acc:MGI:97763]	10177238	10349180	12
ENSMUSG00000029673	0.00446903	0.994425	1.33047	1.44973e-05	Auts2	autism susceptibility candidate 2 [Source:MGI Symbol;Acc:MGI:1919847]	131437333	132543344	20
ENSMUSG00000052105	0.0525051	0.925677	1.39987	1.45224e-05	Mtcl1	microtubule crosslinking factor 1 [Source:MGI Symbol;Acc:MGI:1915867]	66336982	66449750	10
ENSMUSG00000028088	0.466055	0.490673	2.1373	1.45973e-05	Fmo5	flavin containing monooxygenase 5 [Source:MGI Symbol;Acc:MGI:1310004]	97628804	97655282	5
ENSMUSG00000085645	0.565655	0.12441	1.2975	1.55763e-05	Hoxb5os	homeobox B5 and homeobox B6, opposite strand [Source:MGI Symbol;Acc:MGI:1922645]	96291024	96306910	2
ENSMUSG00000036745	0.290882	0.403454	1.12617	1.55763e-05	Ttll7	tubulin tyrosine ligase-like family, member 7 [Source:MGI Symbol;Acc:MGI:1918142]	146852367	146984009	6
ENSMUSG00000021373	0.395713	0.23278	1.12814	1.55763e-05	Cap2	CAP, adenylate cyclase-associated protein, 2 (yeast) [Source:MGI Symbol;Acc:MGI:1914502]	46501848	46650281	5
ENSMUSG00000027796	0.435856	0.46823	1.9684	1.55763e-05	Smad9	SMAD family member 9 [Source:MGI Symbol;Acc:MGI:1859993]	54755582	54801257	1
ENSMUSG00000002565	0.279231	0.720793	2.20485	1.58192e-05	Scin	scinderin [Source:MGI Symbol;Acc:MGI:1306794]	40059769	40134228	2
ENSMUSG00000060988	0.598298	0.463018	2.92813	1.58192e-05	Galnt13	polypeptide N-acetylgalactosaminyltransferase 13 [Source:MGI Symbol;Acc:MGI:2139447]	54436317	55118309	5
ENSMUSG00000016356	0.50325	0.156606	1.2554	1.70122e-05	Col20a1	collagen, type XX, alpha 1 [Source:MGI Symbol;Acc:MGI:1920618]	180986535	181018363	5
ENSMUSG00000022265	-0.291008	0.672839	2.00386	1.70334e-05	Ank	progressive ankylosis [Source:MGI Symbol;Acc:MGI:3045421]	27466677	27594909	2
ENSMUSG00000029729	0.131684	0.490673	0.597673	1.70334e-05	Zkscan1	zinc finger with KRAB and SCAN domains 1 [Source:MGI Symbol;Acc:MGI:1921820]	138085084	138107822	4
ENSMUSG00000042302	0.236578	0.369655	0.867184	1.70334e-05	Ehbp1	EH domain binding protein 1 [Source:MGI Symbol;Acc:MGI:2667252]	22005828	22342292	7
ENSMUSG00000055809	0.35575	0.221914	-0.940841	1.70334e-05	Dnaaf3	dynein, axonemal assembly factor 3 [Source:MGI Symbol;Acc:MGI:3588207]	4522933	4532453	1
ENSMUSG00000092008	0.11002	0.945479	3.98312	1.71012e-05	Cyp2c69	cytochrome P450, family 2, subfamily c, polypeptide 69 [Source:MGI Symbol;Acc:MGI:3721049]	39842814	39886799	2
ENSMUSG00000067818	0.326509	0.427905	1.30908	1.71012e-05	Myl9	myosin, light polypeptide 9, regulatory [Source:MGI Symbol;Acc:MGI:2138915]	156775420	156781658	4
ENSMUSG00000018604	0.146206	0.837	1.89912	1.72489e-05	Tbx3	T-box 3 [Source:MGI Symbol;Acc:MGI:98495]	119670669	119684724	6
ENSMUSG00000056973	0.495388	0.395737	1.87747	1.7418e-05	Ces1d	carboxylesterase 1D [Source:MGI Symbol;Acc:MGI:2148202]	93166068	93197838	4
ENSMUSG00000063873	0.179964	0.720421	1.41588	1.77153e-05	Slc24a3	solute carrier family 24 (sodium/potassium/calcium exchanger), member 3 [Source:MGI Symbol;Acc:MGI:2137513]	145167754	145642166	5
ENSMUSG00000030029	-0.0509456	0.85654	0.732488	1.77953e-05	Lrig1	leucine-rich repeats and immunoglobulin-like domains 1 [Source:MGI Symbol;Acc:MGI:107935]	94604529	94700158	7
ENSMUSG00000057219	-0.224691	0.165863	-0.551954	1.77953e-05	Armc7	armadillo repeat containing 7 [Source:MGI Symbol;Acc:MGI:2679719]	115475667	115490467	4
ENSMUSG00000032358	0.0700782	0.876319	1.15841	1.82629e-05	Fam83b	family with sequence similarity 83, member B [Source:MGI Symbol;Acc:MGI:2685362]	76490054	76567116	2
ENSMUSG00000041476	0.215019	0.828074	2.64522	1.83086e-05	Smpx	small muscle protein, X-linked [Source:MGI Symbol;Acc:MGI:1913356]	157698910	157752591	8
ENSMUSG00000023914	0.844749	0.210809	2.26174	1.83086e-05	Mep1a	meprin 1 alpha [Source:MGI Symbol;Acc:MGI:96963]	43474324	43502812	4
ENSMUSG00000027556	0.841826	0.0466578	1.48161	1.83117e-05	Car1	carbonic anhydrase 1 [Source:MGI Symbol;Acc:MGI:88268]	14766216	14808368	3
ENSMUSG00000071551	0.360959	0.505629	1.67665	1.83983e-05	Akr1c19	aldo-keto reductase family 1, member C19 [Source:MGI Symbol;Acc:MGI:2653678]	4228700	4252843	3
ENSMUSG00000047907	0.434389	0.254821	1.26596	1.83983e-05	Tshz2	teashirt zinc finger family member 2 [Source:MGI Symbol;Acc:MGI:2153084]	169633013	170071816	5
ENSMUSG00000021032	0.378594	0.50104	1.83823	1.85317e-05	Ngb	neuroglobin [Source:MGI Symbol;Acc:MGI:2151886]	87097531	87102539	3
ENSMUSG00000084174	0.13426	0.906004	2.8016	1.85706e-05	Sycn	syncollin [Source:MGI Symbol;Acc:MGI:1915666]	28540885	28542209	1
ENSMUSG00000014846	-0.0530415	0.957715	2.37237	1.85954e-05	Tppp3	tubulin polymerization-promoting protein family member 3 [Source:MGI Symbol;Acc:MGI:1915221]	105467493	105471526	3
ENSMUSG00000028137	0.466536	0.354003	1.6409	1.85954e-05	Celf3	CUGBP, Elav-like family member 3 [Source:MGI Symbol;Acc:MGI:1926034]	94478295	94492198	15
ENSMUSG00000000215	-2.93546	0.619874	17.7895	1.85954e-05	Ins2	insulin II [Source:MGI Symbol;Acc:MGI:96573]	142678656	142743381	9
ENSMUSG00000029167	-0.0266378	0.975676	1.94737	1.8612e-05	Ppargc1a	peroxisome proliferative activated receptor, gamma, coactivator 1 alpha [Source:MGI Symbol;Acc:MGI:1342774]	51454250	51567726	5
ENSMUSG00000029361	0.352032	0.359014	1.26402	1.8612e-05	Nos1	nitric oxide synthase 1, neuronal [Source:MGI Symbol;Acc:MGI:97360]	117781032	117958840	7
ENSMUSG00000028970	-0.0695085	0.919525	1.67985	1.93276e-05	Abcb1b	ATP-binding cassette, sub-family B (MDR/TAP), member 1B [Source:MGI Symbol;Acc:MGI:97568]	8798147	8866315	9
ENSMUSG00000034472	-0.377985	0.663986	2.53756	1.93388e-05	Rasd2	RASD family, member 2 [Source:MGI Symbol;Acc:MGI:1922391]	75213944	75224113	2
ENSMUSG00000038700	0.976576	0.0392124	1.69791	1.95612e-05	Hoxb5	homeobox B5 [Source:MGI Symbol;Acc:MGI:96186]	96303336	96306121	2
ENSMUSG00000029772	0.0637187	0.905903	1.32341	1.95912e-05	Ahcyl2	S-adenosylhomocysteine hydrolase-like 2 [Source:MGI Symbol;Acc:MGI:1921590]	29768011	29912310	23
ENSMUSG00000021820	0.152542	0.301805	0.48624	2.0014e-05	Camk2g	calcium/calmodulin-dependent protein kinase II gamma [Source:MGI Symbol;Acc:MGI:88259]	20734875	20794088	17
ENSMUSG00000051177	0.176487	0.691201	1.28293	2.02334e-05	Plcb1	phospholipase C, beta 1 [Source:MGI Symbol;Acc:MGI:97613]	134786067	135475258	8
ENSMUSG00000027661	0.0862164	0.883158	1.50621	2.0235e-05	Slc2a10	solute carrier family 2 (facilitated glucose transporter), member 10 [Source:MGI Symbol;Acc:MGI:2156687]	165503787	165519917	2
ENSMUSG00000045103	0.198035	0.498153	0.903777	2.03592e-05	Dmd	dystrophin, muscular dystrophy [Source:MGI Symbol;Acc:MGI:94909]	82948870	85206141	14
ENSMUSG00000021708	0.18486	0.72734	1.50782	2.07846e-05	Rasgrf2	RAS protein-specific guanine nucleotide-releasing factor 2 [Source:MGI Symbol;Acc:MGI:109137]	91880400	92131656	6
ENSMUSG00000039607	0.322361	0.357104	1.13407	2.09291e-05	Rbms3	RNA binding motif, single stranded interacting protein [Source:MGI Symbol;Acc:MGI:2444477]	116572746	117629913	12
ENSMUSG00000025905	0.0744988	0.944218	4.09213	2.11162e-05	Oprk1	opioid receptor, kappa 1 [Source:MGI Symbol;Acc:MGI:97439]	5588466	5606131	5
ENSMUSG00000033208	0.48881	0.356362	1.78406	2.14207e-05	S100b	S100 protein, beta polypeptide, neural [Source:MGI Symbol;Acc:MGI:98217]	76253853	76261159	1
ENSMUSG00000096914	0.447052	0.305775	1.46268	2.19245e-05	Galntl6	UDP-N-acetyl-alpha-D-galactosamine:polypeptide N-acetylgalactosaminyltransferase-like 6 [Source:MGI Symbol;Acc:MGI:1913581]	57774052	58912640	9
ENSMUSG00000021745	0.0494384	0.817564	0.564621	2.20655e-05	Ptprg	protein tyrosine phosphatase, receptor type, G [Source:MGI Symbol;Acc:MGI:97814]	11553532	12242041	8
ENSMUSG00000025004	0.0694918	0.961214	3.3888	2.27902e-05	Cyp2c40	cytochrome P450, family 2, subfamily c, polypeptide 40 [Source:MGI Symbol;Acc:MGI:1306815]	39767071	39812814	5
ENSMUSG00000040896	0.586151	0.211086	1.55775	2.2875e-05	Kcnd3	potassium voltage-gated channel, Shal-related family, member 3 [Source:MGI Symbol;Acc:MGI:1928743]	105452330	105674002	5
ENSMUSG00000025867	-0.0158907	0.980836	1.44044	2.29762e-05	Cplx2	complexin 2 [Source:MGI Symbol;Acc:MGI:104726]	54371349	54383917	1
ENSMUSG00000021198	0.18956	0.808687	2.34164	2.29762e-05	Unc79	unc-79 homolog [Source:MGI Symbol;Acc:MGI:2684729]	102948859	103184065	9
ENSMUSG00000067229	2.37164	0.175182	6.67646	2.30281e-05	Cyp2c66	cytochrome P450, family 2, subfamily c, polypeptide 66 [Source:MGI Symbol;Acc:MGI:1917138]	39113898	39187072	2
ENSMUSG00000049811	0.239672	0.751616	2.07409	2.33593e-05	Fam161a	family with sequence similarity 161, member A [Source:MGI Symbol;Acc:MGI:1921123]	23007531	23030788	7
ENSMUSG00000045838	0.371579	0.263363	1.08457	2.36809e-05	Ccdc9b	coiled-coil domain containing 9B [Source:MGI Symbol;Acc:MGI:2685199]	118754158	118762661	2
ENSMUSG00000047496	0.372455	0.541162	1.8611	2.36809e-05	Rnf152	ring finger protein 152 [Source:MGI Symbol;Acc:MGI:2443787]	105276914	105356710	2
ENSMUSG00000050711	0.131414	0.822054	1.52903	2.36809e-05	Scg2	secretogranin II [Source:MGI Symbol;Acc:MGI:103033]	79434669	79440120	2
ENSMUSG00000082922	0.30137	0.688203	2.17569	2.38453e-05	Gm6939	predicted gene 6939 [Source:MGI Symbol;Acc:MGI:3782976]	126687459	126690034	1
ENSMUSG00000066513	0.411998	0.570056	2.23293	2.38453e-05	Klk1b4	kallikrein 1-related pepidase b4 [Source:MGI Symbol;Acc:MGI:97320]	44207435	44211754	1
ENSMUSG00000053985	0.164885	0.64678	1.09347	2.38453e-05	Zfp14	zinc finger protein 14 [Source:MGI Symbol;Acc:MGI:99160]	30036359	30051380	3
ENSMUSG00000110573	0.338799	0.488496	1.49507	2.38948e-05	Gm5485	predicted gene 5485 [Source:MGI Symbol;Acc:MGI:3647875]	48399453	48412416	1
ENSMUSG00000054256	0.23203	0.700522	1.91389	2.40038e-05	Msi1	musashi RNA-binding protein 1 [Source:MGI Symbol;Acc:MGI:107376]	115429599	115455698	9
ENSMUSG00000062980	0.280813	0.576074	1.501	2.49627e-05	Cped1	cadherin-like and PC-esterase domain containing 1 [Source:MGI Symbol;Acc:MGI:2444814]	21985916	22256404	8
ENSMUSG00000042589	0.76216	0.140347	1.7959	2.53859e-05	Cux2	cut-like homeobox 2 [Source:MGI Symbol;Acc:MGI:107321]	121856366	122050102	11
ENSMUSG00000056596	0.45947	0.42675	1.8302	2.55238e-05	Trnp1	TMF1-regulated nuclear protein 1 [Source:MGI Symbol;Acc:MGI:1916789]	133491100	133498550	2
ENSMUSG00000034040	-0.38011	0.652045	2.5804	2.6189e-05	Galnt17	polypeptide N-acetylgalactosaminyltransferase 17 [Source:MGI Symbol;Acc:MGI:2137594]	130872082	131308497	5
ENSMUSG00000028909	-0.303606	0.66459	2.03615	2.672e-05	Ptpru	protein tyrosine phosphatase, receptor type, U [Source:MGI Symbol;Acc:MGI:1321151]	131768457	131838288	8
ENSMUSG00000035273	-0.295744	0.00258686	-0.354508	2.672e-05	Hpse	heparanase [Source:MGI Symbol;Acc:MGI:1343124]	100679484	100719716	2
ENSMUSG00000048763	0.758395	0.071886	1.45746	2.672e-05	Hoxb3	homeobox B3 [Source:MGI Symbol;Acc:MGI:96184]	96323326	96347930	4
ENSMUSG00000040759	0.21731	0.839744	3.7356	2.672e-05	Cmtm5	CKLF-like MARVEL transmembrane domain containing 5 [Source:MGI Symbol;Acc:MGI:2447164]	54936261	54939274	3
ENSMUSG00000045348	0.518553	0.302026	1.63469	2.672e-05	Nyap1	neuronal tyrosine-phosphorylated phosphoinositide 3-kinase adaptor 1 [Source:MGI Symbol;Acc:MGI:2443880]	137729899	137741607	4
ENSMUSG00000022836	0.278481	0.484927	1.21166	2.672e-05	Mylk	myosin, light polypeptide kinase [Source:MGI Symbol;Acc:MGI:894806]	34745210	35002420	8
ENSMUSG00000030849	0.15974	0.749512	1.34713	2.68118e-05	Fgfr2	fibroblast growth factor receptor 2 [Source:MGI Symbol;Acc:MGI:95523]	130162451	133123350	27
ENSMUSG00000036863	0.113111	0.747092	0.966947	2.74387e-05	Syde2	synapse defective 1, Rho GTPase, homolog 2 (C. elegans) [Source:MGI Symbol;Acc:MGI:3036264]	145987870	146021720	4
ENSMUSG00000027499	0.47779	0.0741973	0.916707	2.8357e-05	Pkia	protein kinase inhibitor, alpha [Source:MGI Symbol;Acc:MGI:104747]	7366669	7445366	3
ENSMUSG00000041828	0.380997	0.572666	2.01328	2.91559e-05	Abca8a	ATP-binding cassette, sub-family A (ABC1), member 8a [Source:MGI Symbol;Acc:MGI:2386846]	110025634	110095978	8
ENSMUSG00000039765	0.211399	0.462953	0.895708	2.92598e-05	Cc2d2a	coiled-coil and C2 domain containing 2A [Source:MGI Symbol;Acc:MGI:1924487]	43662346	43740972	4
ENSMUSG00000070423	0.328876	0.710035	2.57748	2.93749e-05	Olfr558	olfactory receptor 558 [Source:MGI Symbol;Acc:MGI:3030392]	102702215	102712064	1
ENSMUSG00000054423	0.0536791	0.943709	1.84774	2.93749e-05	Cadps	Ca2+-dependent secretion activator [Source:MGI Symbol;Acc:MGI:1350922]	12372563	12823079	12
ENSMUSG00000042340	-0.284496	0.480934	1.32166	2.94839e-05	Ctf1	cardiotrophin 1 [Source:MGI Symbol;Acc:MGI:105115]	127712736	127718192	5
ENSMUSG00000106944	0.529408	0.316952	1.94875	2.94839e-05	Gm43843	predicted gene 43843 [Source:MGI Symbol;Acc:MGI:5663980]	18429659	18431245	1
ENSMUSG00000052485	0.0264681	0.966793	1.44947	3.00884e-05	Tmem171	transmembrane protein 171 [Source:MGI Symbol;Acc:MGI:2685751]	98686235	98694834	2
ENSMUSG00000030000	-0.344834	0.52437	1.89629	3.00884e-05	Add2	adducin 2 (beta) [Source:MGI Symbol;Acc:MGI:87919]	86028681	86124409	10
ENSMUSG00000027438	0.18716	0.433555	0.766323	3.00884e-05	Napb	N-ethylmaleimide sensitive fusion protein attachment protein beta [Source:MGI Symbol;Acc:MGI:104562]	148693985	148732467	3
ENSMUSG00000104535	0.950107	0.23278	2.6739	3.02003e-05	Gm42686	predicted gene 42686 [Source:MGI Symbol;Acc:MGI:5662823]	8731661	8735768	1
ENSMUSG00000043020	0.394087	0.743867	4.12853	3.02465e-05	Wdr63	WD repeat domain 63 [Source:MGI Symbol;Acc:MGI:3045269]	146040526	146108130	3
ENSMUSG00000042251	-0.222419	0.781782	2.12379	3.16379e-05	Pm20d1	peptidase M20 domain containing 1 [Source:MGI Symbol;Acc:MGI:2442939]	131797381	131821473	4
ENSMUSG00000061013	0.0259035	0.965381	1.37707	3.16379e-05	Mkx	mohawk homeobox [Source:MGI Symbol;Acc:MGI:2687286]	6934518	7004780	4
ENSMUSG00000026492	0.101561	0.583455	0.549029	3.16379e-05	Tfb2m	transcription factor B2, mitochondrial [Source:MGI Symbol;Acc:MGI:107937]	179528055	179546267	5
ENSMUSG00000056978	-0.676801	0.766424	6.82112	3.1665e-05	Hamp2	hepcidin antimicrobial peptide 2 [Source:MGI Symbol;Acc:MGI:2153530]	30922372	30924681	3
ENSMUSG00000102185	-0.820785	0.544932	4.32501	3.2108e-05	5033404E19Rik	RIKEN cDNA 5033404E19 gene [Source:MGI Symbol;Acc:MGI:2149700]	185487294	185498159	2
ENSMUSG00000061808	-0.461564	0.60654	2.59996	3.23131e-05	Ttr	transthyretin [Source:MGI Symbol;Acc:MGI:98865]	20665280	20674321	1
ENSMUSG00000020672	0.388235	0.363947	1.34113	3.25144e-05	Sntg2	syntrophin, gamma 2 [Source:MGI Symbol;Acc:MGI:1919541]	30174482	30373375	9
ENSMUSG00000044338	-0.285757	0.692124	2.07615	3.25144e-05	Aplnr	apelin receptor [Source:MGI Symbol;Acc:MGI:1346086]	85136225	85139923	2
ENSMUSG00000053963	0.420342	0.352691	1.41514	3.27869e-05	Stum	mechanosensory transduction mediator [Source:MGI Symbol;Acc:MGI:2138735]	180432387	180483504	6
ENSMUSG00000026676	-0.176515	0.755232	1.51488	3.27869e-05	Ccdc3	coiled-coil domain containing 3 [Source:MGI Symbol;Acc:MGI:1921436]	5137776	5230878	1
ENSMUSG00000097336	0.411424	0.29004	1.23919	3.27869e-05	Fendrr	Foxf1 adjacent non-coding developmental regulatory RNA [Source:MGI Symbol;Acc:MGI:1916040]	121054882	121083110	3
ENSMUSG00000029727	0.549535	0.248116	1.52945	3.32014e-05	Cyp3a13	cytochrome P450, family 3, subfamily a, polypeptide 13 [Source:MGI Symbol;Acc:MGI:88610]	137892932	137921619	1
ENSMUSG00000027869	0.662975	0.332555	2.27948	3.49351e-05	Hsd3b6	hydroxy-delta-5-steroid dehydrogenase, 3 beta- and steroid delta-isomerase 6 [Source:MGI Symbol;Acc:MGI:109598]	98805504	98814443	3
ENSMUSG00000033910	0.359288	0.370492	1.25516	3.50063e-05	Gucy1a1	guanylate cyclase 1, soluble, alpha 1 [Source:MGI Symbol;Acc:MGI:1926562]	82092427	82145789	5
ENSMUSG00000057614	0.205279	0.650688	1.28275	3.57076e-05	Gnai1	guanine nucleotide binding protein (G protein), alpha inhibiting 1 [Source:MGI Symbol;Acc:MGI:95771]	18265135	18360355	1
ENSMUSG00000028713	2.32804	0.00149596	2.57977	3.59905e-05	Cyp4b1	cytochrome P450, family 4, subfamily b, polypeptide 1 [Source:MGI Symbol;Acc:MGI:103225]	115624725	115647723	4
ENSMUSG00000032549	0.382863	0.324839	1.27824	3.59905e-05	Rab6b	RAB6B, member RAS oncogene family [Source:MGI Symbol;Acc:MGI:107283]	103111787	103185276	2
ENSMUSG00000000394	0.0540734	0.894249	0.989372	3.59905e-05	Gcg	glucagon [Source:MGI Symbol;Acc:MGI:95674]	62474530	62483650	3
ENSMUSG00000021388	0.702169	0.0727438	1.31457	3.64481e-05	Aspn	asporin [Source:MGI Symbol;Acc:MGI:1913945]	49544443	49567565	2
ENSMUSG00000085779	1.20856	0.0503542	2.16454	3.64481e-05	Atcayos	ataxia, cerebellar, Cayman type, opposite strand [Source:MGI Symbol;Acc:MGI:1916928]	81194609	81210877	3
ENSMUSG00000071317	0.485082	0.2521	1.37652	3.64481e-05	Bves	blood vessel epicardial substance [Source:MGI Symbol;Acc:MGI:1346013]	45335772	45372479	2
ENSMUSG00000038692	0.836074	0.00874306	1.13351	3.73922e-05	Hoxb4	homeobox B4 [Source:MGI Symbol;Acc:MGI:96185]	96318267	96321638	1
ENSMUSG00000067889	-0.586997	0.308606	1.82617	3.73922e-05	Sptbn2	spectrin beta, non-erythrocytic 2 [Source:MGI Symbol;Acc:MGI:1313261]	4711167	4752360	3
ENSMUSG00000048337	0.186513	0.721261	1.42644	3.73922e-05	Npy4r	neuropeptide Y receptor Y4 [Source:MGI Symbol;Acc:MGI:105374]	34143992	34152489	1
ENSMUSG00000018451	0.610849	0.154745	1.48707	3.83559e-05	6330403K07Rik	RIKEN cDNA 6330403K07 gene [Source:MGI Symbol;Acc:MGI:1918001]	71031941	71033513	1
ENSMUSG00000041741	0.0759453	0.638876	0.457609	3.96728e-05	Pde3a	phosphodiesterase 3A, cGMP inhibited [Source:MGI Symbol;Acc:MGI:1860764]	141249269	141507448	2
ENSMUSG00000004631	0.309944	0.419674	1.18065	4.00935e-05	Sgce	sarcoglycan, epsilon [Source:MGI Symbol;Acc:MGI:1329042]	4674350	4747207	13
ENSMUSG00000045215			2.87681	4.00935e-05	Asxl3	additional sex combs like 3, transcriptional regulator [Source:MGI Symbol;Acc:MGI:2685175]	22344883	22530227	3
ENSMUSG00000021994	0.0671969	0.905392	1.34857	4.02795e-05	Wnt5a	wingless-type MMTV integration site family, member 5A [Source:MGI Symbol;Acc:MGI:98958]	28504750	28527448	6
ENSMUSG00000049551	-0.132277	0.924721	3.46695	4.04611e-05	Fzd9	frizzled class receptor 9 [Source:MGI Symbol;Acc:MGI:1313278]	135248938	135251230	1
ENSMUSG00000041479	-0.193902	0.723951	1.68918	4.10301e-05	Syt15	synaptotagmin XV [Source:MGI Symbol;Acc:MGI:2442166]	34219595	34230420	3
ENSMUSG00000050875	0.706659	0.276179	2.35683	4.10915e-05	Minar2	membrane integral NOTCH2 associated receptor 2 [Source:MGI Symbol;Acc:MGI:2442934]	59062248	59076962	7
ENSMUSG00000051331	0.384774	0.266357	1.09559	4.11836e-05	Cacna1c	calcium channel, voltage-dependent, L type, alpha 1C subunit [Source:MGI Symbol;Acc:MGI:103013]	118587240	119196418	27
ENSMUSG00000003657	0.256555	0.675562	1.73366	4.12614e-05	Calb2	calbindin 2 [Source:MGI Symbol;Acc:MGI:101914]	110137502	110168210	2
ENSMUSG00000078716	0.398047	0.344427	1.33536	4.15758e-05	Tmem8b	transmembrane protein 8B [Source:MGI Symbol;Acc:MGI:2441680]	43668971	43692668	9
ENSMUSG00000020182	-0.254144	0.65742	1.59507	4.21716e-05	Ddc	dopa decarboxylase [Source:MGI Symbol;Acc:MGI:94876]	11814101	11898144	10
ENSMUSG00000021303	-0.11267	0.864884	1.71756	4.24973e-05	Gng4	guanine nucleotide binding protein (G protein), gamma 4 [Source:MGI Symbol;Acc:MGI:102703]	13784059	13827896	3
ENSMUSG00000039542	0.0566683	0.911241	1.21921	4.30211e-05	Ncam1	neural cell adhesion molecule 1 [Source:MGI Symbol;Acc:MGI:97281]	49502136	49798925	7
ENSMUSG00000034621	0.0950365	0.572623	0.48986	4.30278e-05	Gpatch8	G patch domain containing 8 [Source:MGI Symbol;Acc:MGI:1918667]	102475915	102556392	6
ENSMUSG00000048960	0.397887	0.406859	1.48117	4.30278e-05	Prex2	phosphatidylinositol-3,4,5-trisphosphate-dependent Rac exchange factor 2 [Source:MGI Symbol;Acc:MGI:1923385]	10993465	11303681	8
ENSMUSG00000074240	0.083377	0.960953	4.96848	4.33824e-05	Cib3	calcium and integrin binding family member 3 [Source:MGI Symbol;Acc:MGI:2685953]	72204335	72212837	2
ENSMUSG00000060579	0.31213	0.359014	1.07609	4.34866e-05	Fhit	fragile histidine triad gene [Source:MGI Symbol;Acc:MGI:1277947]	9550092	11162035	8
ENSMUSG00000027253	-0.0755764	0.811433	0.806735	4.41423e-05	Lrp4	low density lipoprotein receptor-related protein 4 [Source:MGI Symbol;Acc:MGI:2442252]	91457511	91513779	4
ENSMUSG00000052974	-1.10867	0.350551	3.707	4.41672e-05	Cyp2f2	cytochrome P450, family 2, subfamily f, polypeptide 2 [Source:MGI Symbol;Acc:MGI:88608]	27119909	27133660	3
ENSMUSG00000040147	-0.0318894	0.961838	1.50829	4.41672e-05	Maob	monoamine oxidase B [Source:MGI Symbol;Acc:MGI:96916]	16709282	16817366	4
ENSMUSG00000033427	-0.277652	0.54619	1.41101	4.44844e-05	Upb1	ureidopropionase, beta [Source:MGI Symbol;Acc:MGI:2143535]	75401115	75441679	5
ENSMUSG00000040605	-0.090351	0.835747	1.08803	4.4587e-05	Bace2	beta-site APP-cleaving enzyme 2 [Source:MGI Symbol;Acc:MGI:1860440]	97356742	97442936	4
ENSMUSG00000027799	0.328834	0.409794	1.22879	4.4587e-05	Nbea	neurobeachin [Source:MGI Symbol;Acc:MGI:1347075]	55625195	56183701	10
ENSMUSG00000022054	-0.460293	0.359169	1.72976	4.47661e-05	Nefm	neurofilament, medium polypeptide [Source:MGI Symbol;Acc:MGI:97314]	68082590	68124846	2
ENSMUSG00000062624	0.0677176	0.966244	3.66242	4.58565e-05	Cyp2c67	cytochrome P450, family 2, subfamily c, polypeptide 67 [Source:MGI Symbol;Acc:MGI:3612288]	39608842	39649051	1
ENSMUSG00000021268	0.255834	0.593181	1.36904	4.58565e-05	Meg3	maternally expressed 3 [Source:MGI Symbol;Acc:MGI:1202886]	109541001	109571726	11
ENSMUSG00000027513	-0.341789	0.720184	2.54488	4.58565e-05	Pck1	phosphoenolpyruvate carboxykinase 1, cytosolic [Source:MGI Symbol;Acc:MGI:97501]	173153048	173159273	4
ENSMUSG00000040118	0.318938	0.409994	1.18099	4.58565e-05	Cacna2d1	calcium channel, voltage-dependent, alpha2/delta subunit 1 [Source:MGI Symbol;Acc:MGI:88295]	15934691	16374511	12
ENSMUSG00000054162	0.678864	0.215215	1.9525	4.58565e-05	Spock3	sparc/osteonectin, cwcv and kazal-like domains proteoglycan 3 [Source:MGI Symbol;Acc:MGI:1920152]	62951009	63357103	6
ENSMUSG00000017316	0.42541	0.499036	1.85415	4.62574e-05	Ppy	pancreatic polypeptide [Source:MGI Symbol;Acc:MGI:97753]	102099930	102101319	2
ENSMUSG00000058099	-0.22403	0.453136	-0.888879	4.68183e-05	Nfam1	Nfat activating molecule with ITAM motif 1 [Source:MGI Symbol;Acc:MGI:1921289]	82992973	83033306	5
ENSMUSG00000040537	0.324156	0.273835	0.939549	4.75029e-05	Adam22	a disintegrin and metallopeptidase domain 22 [Source:MGI Symbol;Acc:MGI:1340046]	8072352	8368160	24
ENSMUSG00000029195	-0.644663	0.510683	2.92574	4.83793e-05	Klb	klotho beta [Source:MGI Symbol;Acc:MGI:1932466]	65348314	65384007	3
ENSMUSG00000039239	0.182703	0.645101	1.13572	4.83992e-05	Tgfb2	transforming growth factor, beta 2 [Source:MGI Symbol;Acc:MGI:98726]	186622792	186705989	6
ENSMUSG00000037254	-0.725663	0.585185	3.89757	4.84792e-05	Itih2	inter-alpha trypsin inhibitor, heavy chain 2 [Source:MGI Symbol;Acc:MGI:96619]	10094593	10131396	3
ENSMUSG00000023092	-0.00879378	0.989617	1.49478	4.84792e-05	Fhl1	four and a half LIM domains 1 [Source:MGI Symbol;Acc:MGI:1298387]	56731787	56793346	10
ENSMUSG00000027993	0.108417	0.816594	1.16921	4.84792e-05	Trim2	tripartite motif-containing 2 [Source:MGI Symbol;Acc:MGI:1933163]	84160439	84306877	19
ENSMUSG00000032500	-0.217865	0.790052	2.43666	4.84792e-05	Dclk3	doublecortin-like kinase 3 [Source:MGI Symbol;Acc:MGI:3039580]	111439081	111489118	1
ENSMUSG00000041794	0.420768	0.43394	1.64424	4.85238e-05	Myrip	myosin VIIA and Rab interacting protein [Source:MGI Symbol;Acc:MGI:2384407]	120301513	120474841	5
ENSMUSG00000027894	0.378927	0.384611	1.33996	4.90864e-05	Slc6a17	solute carrier family 6 (neurotransmitter transporter), member 17 [Source:MGI Symbol;Acc:MGI:2442535]	107467543	107518018	10
ENSMUSG00000033207	0.263934	0.74142	2.12288	4.93375e-05	Mamdc2	MAM domain containing 2 [Source:MGI Symbol;Acc:MGI:1918988]	23302609	23448442	2
ENSMUSG00000022537	0.193101	0.777734	1.8349	4.93375e-05	Tmem44	transmembrane protein 44 [Source:MGI Symbol;Acc:MGI:1924489]	30511855	30550842	9
ENSMUSG00000085382			4.93964	4.9606e-05	Gm13861	predicted gene 13861 [Source:MGI Symbol;Acc:MGI:3649466]	34651354	34653894	1
ENSMUSG00000028524	0.11857	0.774675	1.11482	4.9845e-05	Sgip1	SH3-domain GRB2-like (endophilin) interacting protein 1 [Source:MGI Symbol;Acc:MGI:1920344]	102741297	102973628	15
ENSMUSG00000032902	0.107699	0.699861	0.754464	5.03326e-05	Slc16a1	solute carrier family 16 (monocarboxylic acid transporters), member 1 [Source:MGI Symbol;Acc:MGI:106013]	104638668	104658462	1
ENSMUSG00000034707	-0.1977	0.23901	-0.527469	5.17441e-05	Gns	glucosamine (N-acetyl)-6-sulfatase [Source:MGI Symbol;Acc:MGI:1922862]	121365090	121397249	10
ENSMUSG00000034936	0.612085	0.280129	1.77188	5.2262e-05	Arl4d	ADP-ribosylation factor-like 4D [Source:MGI Symbol;Acc:MGI:1933155]	101665541	101667832	1
ENSMUSG00000030075	0.651827	0.302026	2.04281	5.2726e-05	Cntn3	contactin 3 [Source:MGI Symbol;Acc:MGI:99534]	102162655	102573101	3
ENSMUSG00000021700	0.212736	0.729263	1.65286	5.3289e-05	Rab3c	RAB3C, member RAS oncogene family [Source:MGI Symbol;Acc:MGI:1914545]	110054187	110280996	5
ENSMUSG00000046804	0.501567	0.393699	1.76984	5.50482e-05	Phgr1	proline/histidine/glycine-rich 1 [Source:MGI Symbol;Acc:MGI:1858382]	118772769	118778165	2
ENSMUSG00000021376	0.530158	0.105302	1.06908	5.50482e-05	Tpmt	thiopurine methyltransferase [Source:MGI Symbol;Acc:MGI:98812]	47022482	47044737	8
ENSMUSG00000058498	0.563355	0.348806	1.86743	5.5239e-05	Rnf207	ring finger protein 207 [Source:MGI Symbol;Acc:MGI:2684989]	152307019	152318993	12
ENSMUSG00000115317	0.283319	0.545877	1.39425	5.5393e-05	Gm32618	predicted gene, 32618 [Source:MGI Symbol;Acc:MGI:5591777]	32778904	32796006	1
ENSMUSG00000010095	-0.254289	0.0447254	-0.417992	5.57952e-05	Slc3a2	solute carrier family 3 (activators of dibasic and neutral amino acid transport), member 2 [Source:MGI Symbol;Acc:MGI:96955]	8706882	8723369	9
ENSMUSG00000036764	0.223229	0.481641	0.954755	5.59843e-05	Dnajc12	DnaJ heat shock protein family (Hsp40) member C12 [Source:MGI Symbol;Acc:MGI:1353428]	63382443	63410576	3
ENSMUSG00000089661	0.347863	0.69432	2.48642	5.59843e-05	Mia	melanoma inhibitory activity [Source:MGI Symbol;Acc:MGI:109615]	27179742	27181157	4
ENSMUSG00000044461	-0.614429	0.293364	1.80664	5.60744e-05	Shisa2	shisa family member 2 [Source:MGI Symbol;Acc:MGI:2444716]	59625308	59631660	2
ENSMUSG00000063684	0.0912561	0.68972	0.619972	5.60744e-05	Gm13910	predicted gene 13910 [Source:MGI Symbol;Acc:MGI:3651143]	108948806	108950233	1
ENSMUSG00000035112	-0.091717	0.842372	1.13697	5.62573e-05	Wnk4	WNK lysine deficient protein kinase 4 [Source:MGI Symbol;Acc:MGI:1917097]	101260567	101277409	5
ENSMUSG00000002458	-0.0201813	0.94518	-0.653861	5.66833e-05	Rgs19	regulator of G-protein signaling 19 [Source:MGI Symbol;Acc:MGI:1915153]	181688419	181693977	12
ENSMUSG00000027544	-0.29848	0.107382	-0.60289	5.66833e-05	Nfatc2	nuclear factor of activated T cells, cytoplasmic, calcineurin dependent 2 [Source:MGI Symbol;Acc:MGI:102463]	168476410	168601657	9
ENSMUSG00000041633	0.173579	0.769804	1.54875	5.75723e-05	Kctd12b	potassium channel tetramerisation domain containing 12b [Source:MGI Symbol;Acc:MGI:2444667]	153685154	153696391	2
ENSMUSG00000031841	-0.0597081	0.925989	1.4959	5.7888e-05	Cdh13	cadherin 13 [Source:MGI Symbol;Acc:MGI:99551]	118283733	119324921	8
ENSMUSG00000040037	0.254784	0.680396	1.72338	5.7888e-05	Negr1	neuronal growth regulator 1 [Source:MGI Symbol;Acc:MGI:2444846]	156561794	157316445	5
ENSMUSG00000020186	-0.00766715	0.98624	0.935921	5.80478e-05	Csrp2	cysteine and glycine-rich protein 2 [Source:MGI Symbol;Acc:MGI:1202907]	110919789	110939622	7
ENSMUSG00000097451	0.34346	0.388293	1.21078	5.81903e-05	Rian	RNA imprinted and accumulated in nucleus [Source:MGI Symbol;Acc:MGI:1922995]	109603940	109661716	20
ENSMUSG00000031712	0.367105	0.166225	0.855107	5.82491e-05	Il15	interleukin 15 [Source:MGI Symbol;Acc:MGI:103014]	82331632	82403222	10
ENSMUSG00000020019	0.266299	0.648245	1.61613	5.83908e-05	Ntn4	netrin 4 [Source:MGI Symbol;Acc:MGI:1888978]	93640681	93747207	2
ENSMUSG00000095649	0.206768	0.574996	1.0527	5.83908e-05	Gm8979	predicted gene 8979 [Source:MGI Symbol;Acc:MGI:3703149]	106076751	106084046	1
ENSMUSG00000038349	0.459526	0.299185	1.38742	5.86111e-05	Plcl1	phospholipase C-like 1 [Source:MGI Symbol;Acc:MGI:3036262]	55405921	55754285	2
ENSMUSG00000002265	0.25072	0.634561	1.47039	5.86465e-05	Peg3	paternally expressed 3 [Source:MGI Symbol;Acc:MGI:104748]	6703892	6730431	4
ENSMUSG00000000359	0.336615	0.301455	1.0283	5.91499e-05	Rem1	rad and gem related GTP binding protein 1 [Source:MGI Symbol;Acc:MGI:1097696]	152626951	152635198	3
ENSMUSG00000042046	0.13265	0.528345	0.613137	5.92255e-05	Dstyk	dual serine/threonine and tyrosine protein kinase [Source:MGI Symbol;Acc:MGI:1925064]	132417555	132466958	6
ENSMUSG00000035878	0.0809898	0.911518	1.71835	5.92255e-05	Hykk	hydroxylysine kinase 1 [Source:MGI Symbol;Acc:MGI:2443139]	54917283	54949924	4
ENSMUSG00000002222	0.0181659	0.952357	0.683632	5.9279e-05	Rmnd5a	required for meiotic nuclear division 5 homolog A [Source:MGI Symbol;Acc:MGI:1915727]	71388634	71440637	5
ENSMUSG00000063450	-0.2319	0.61666	1.28592	6.02752e-05	Syne2	spectrin repeat containing, nuclear envelope 2 [Source:MGI Symbol;Acc:MGI:2449316]	75818134	76110926	17
ENSMUSG00000005534	0.0129582	0.976123	0.901566	6.11113e-05	Insr	insulin receptor [Source:MGI Symbol;Acc:MGI:96575]	3122061	3279617	5
ENSMUSG00000107655	0.369533	0.529875	1.77649	6.11113e-05	Gm44220	predicted gene, 44220 [Source:MGI Symbol;Acc:MGI:5690612]	93241720	93244206	1
ENSMUSG00000021620	0.336252	0.587982	1.82854	6.11113e-05	Acot12	acyl-CoA thioesterase 12 [Source:MGI Symbol;Acc:MGI:1921406]	91741512	91786148	3
ENSMUSG00000023960	-0.0852545	0.750341	0.690328	6.11118e-05	Enpp5	ectonucleotide pyrophosphatase/phosphodiesterase 5 [Source:MGI Symbol;Acc:MGI:1933830]	44078813	44086567	3
ENSMUSG00000067279	0.437124	0.272146	1.23919	6.11616e-05	Ppp1r3c	protein phosphatase 1, regulatory subunit 3C [Source:MGI Symbol;Acc:MGI:1858229]	36731731	36736653	1
ENSMUSG00000029153	0.109335	0.773016	0.955197	6.20431e-05	Ociad2	OCIA domain containing 2 [Source:MGI Symbol;Acc:MGI:1916377]	73322199	73341028	6
ENSMUSG00000024511	0.189129	0.524754	0.85709	6.24296e-05	Rab27b	RAB27B, member RAS oncogene family [Source:MGI Symbol;Acc:MGI:1931295]	69979131	70141605	4
ENSMUSG00000045005	-0.0711887	0.832523	0.824857	6.24296e-05	Fzd5	frizzled class receptor 5 [Source:MGI Symbol;Acc:MGI:108571]	64730558	64737751	2
ENSMUSG00000001663	0.285083	0.520015	1.28156	6.24332e-05	Gstt1	glutathione S-transferase, theta 1 [Source:MGI Symbol;Acc:MGI:107379]	75783813	75798584	3
ENSMUSG00000020000	0.158559	0.842297	2.31771	6.28561e-05	Moxd1	monooxygenase, DBH-like 1 [Source:MGI Symbol;Acc:MGI:1921582]	24223517	24302790	2
ENSMUSG00000026697	0.805971	0.331531	3.26174	6.40458e-05	Myoc	myocilin [Source:MGI Symbol;Acc:MGI:1202864]	162639155	162649693	1
ENSMUSG00000054128	0.737449	0.289559	2.14166	6.40458e-05	H2-T3	histocompatibility 2, T region locus 3 [Source:MGI Symbol;Acc:MGI:95959]	36185572	36190287	10
ENSMUSG00000032064	0.385322	0.346607	1.24683	6.4205e-05	Dixdc1	DIX domain containing 1 [Source:MGI Symbol;Acc:MGI:2679721]	50662752	50739517	12
ENSMUSG00000034810	0.529659	0.222982	1.36093	6.48278e-05	Scn7a	sodium channel, voltage-gated, type VII, alpha [Source:MGI Symbol;Acc:MGI:102965]	66673425	66784914	1
ENSMUSG00000032186	0.392428	0.297087	1.16143	6.48278e-05	Tmod2	tropomodulin 2 [Source:MGI Symbol;Acc:MGI:1355335]	75565621	75611325	9
ENSMUSG00000057777	0.413973	0.294484	1.20788	6.49665e-05	Mab21l2	mab-21-like 2 (C. elegans) [Source:MGI Symbol;Acc:MGI:1346022]	86545581	86548629	2
ENSMUSG00000053825	0.514462	0.320784	1.73555	6.56551e-05	Ppfia2	protein tyrosine phosphatase, receptor type, f polypeptide (PTPRF), interacting protein (liprin), alpha 2 [Source:MGI Symbol;Acc:MGI:2443834]	106470339	106935952	4
ENSMUSG00000047261	0.194506	0.680807	1.32944	6.57337e-05	Gap43	growth associated protein 43 [Source:MGI Symbol;Acc:MGI:95639]	42248442	42340651	2
ENSMUSG00000036699	0.121435	0.843108	1.57504	6.59088e-05	Zcchc12	zinc finger, CCHC domain containing 12 [Source:MGI Symbol;Acc:MGI:1919943]	36195904	36199158	4
ENSMUSG00000099689	0.302511	0.299185	0.916225	6.59088e-05	Zfp383	zinc finger protein 383 [Source:MGI Symbol;Acc:MGI:1920979]	29908223	29916813	2
ENSMUSG00000031255	0.204146	0.462314	0.817047	6.59253e-05	Sytl4	synaptotagmin-like 4 [Source:MGI Symbol;Acc:MGI:1351606]	133936385	133981812	5
ENSMUSG00000038248	0.320798	0.469681	1.32237	6.65647e-05	Sobp	sine oculis binding protein [Source:MGI Symbol;Acc:MGI:1924427]	43002500	43174530	2
ENSMUSG00000075053	0.193855	0.351993	0.626165	6.67778e-05	Vdac3-ps1	voltage-dependent anion channel 3, pseudogene 1 [Source:MGI Symbol;Acc:MGI:1270159]	18030741	18031593	1
ENSMUSG00000022231	-0.328212	0.444158	1.26226	6.70911e-05	Sema5a	sema domain, seven thrombospondin repeats (type 1 and type 1-like), transmembrane domain (TM) and short cytoplasmic domain, (semaphorin) 5A [Source:MGI Symbol;Acc:MGI:107556]	32244810	32696341	9
ENSMUSG00000058260	-0.667511	0.457129	2.80719	6.74689e-05	Serpina9	serine (or cysteine) peptidase inhibitor, clade A (alpha-1 antiproteinase, antitrypsin), member 9 [Source:MGI Symbol;Acc:MGI:1919157]	103994743	104013755	2
ENSMUSG00000019966	0.0305821	0.943075	0.946698	6.77769e-05	Kitl	kit ligand [Source:MGI Symbol;Acc:MGI:96974]	100015630	100100416	6
ENSMUSG00000041058	0.13671	0.547552	0.647409	6.79733e-05	Wwp1	WW domain containing E3 ubiquitin protein ligase 1 [Source:MGI Symbol;Acc:MGI:1861728]	19608303	19708993	2
ENSMUSG00000019762	-0.111339	0.913632	2.39952	6.8131e-05	Iyd	iodotyrosine deiodinase [Source:MGI Symbol;Acc:MGI:1917587]	3540240	3554877	2
ENSMUSG00000025037	0.340496	0.22813	0.874068	6.83541e-05	Maoa	monoamine oxidase A [Source:MGI Symbol;Acc:MGI:96915]	16619698	16687818	1
ENSMUSG00000041650	-0.196978	0.572623	0.985198	6.87271e-05	Pcca	propionyl-Coenzyme A carboxylase, alpha polypeptide [Source:MGI Symbol;Acc:MGI:97499]	122534324	122891100	13
ENSMUSG00000034731	0.347563	0.433878	1.30753	6.87271e-05	Dgkh	diacylglycerol kinase, eta [Source:MGI Symbol;Acc:MGI:2444188]	78558750	78732776	6
ENSMUSG00000003273	0.286427	0.511232	1.29491	6.98792e-05	Car11	carbonic anhydrase 11 [Source:MGI Symbol;Acc:MGI:1336193]	45699843	45704682	5
ENSMUSG00000040666	0.331241	0.442648	1.26726	7.05528e-05	Sh3bgr	SH3-binding domain glutamic acid-rich protein [Source:MGI Symbol;Acc:MGI:1354740]	96200450	96228935	10
ENSMUSG00000039883	-0.0983437	0.918634	2.27243	7.06013e-05	Lrrc17	leucine rich repeat containing 17 [Source:MGI Symbol;Acc:MGI:1921761]	21543559	21575904	2
ENSMUSG00000024712	0.15038	0.549951	0.711579	7.13655e-05	Rfk	riboflavin kinase [Source:MGI Symbol;Acc:MGI:1914688]	17394043	17401349	3
ENSMUSG00000030161	0.0221645	0.948646	0.764671	7.25802e-05	Gabarapl1	gamma-aminobutyric acid (GABA) A receptor-associated protein-like 1 [Source:MGI Symbol;Acc:MGI:1914980]	129533160	129542346	4
ENSMUSG00000061322	0.04555	0.973249	2.96621	7.25802e-05	Dnaic1	dynein, axonemal, intermediate chain 1 [Source:MGI Symbol;Acc:MGI:1916172]	41569775	41638158	3
ENSMUSG00000043673	0.27745	0.613888	1.56851	7.25802e-05	Kcns3	potassium voltage-gated channel, delayed-rectifier, subfamily S, member 3 [Source:MGI Symbol;Acc:MGI:1098804]	11090202	11151056	3
ENSMUSG00000025089	0.335313	0.592336	1.79903	7.28104e-05	Gfra1	glial cell line derived neurotrophic factor family receptor alpha 1 [Source:MGI Symbol;Acc:MGI:1100842]	58235604	58455909	9
ENSMUSG00000010066	-0.208785	0.730334	1.5795	7.33004e-05	Cacna2d2	calcium channel, voltage-dependent, alpha 2/delta subunit 2 [Source:MGI Symbol;Acc:MGI:1929813]	107399612	107529343	10
ENSMUSG00000025576	-0.0939321	0.9193	3.28707	7.33004e-05	Rbfox3	RNA binding protein, fox-1 homolog (C. elegans) 3 [Source:MGI Symbol;Acc:MGI:106368]	118489762	118911597	10
ENSMUSG00000005672	-0.0873515	0.887085	1.43991	7.48509e-05	Kit	KIT proto-oncogene receptor tyrosine kinase [Source:MGI Symbol;Acc:MGI:96677]	75574916	75656722	8
ENSMUSG00000053519	1.04039	0.164016	2.42924	7.48509e-05	Kcnip1	Kv channel-interacting protein 1 [Source:MGI Symbol;Acc:MGI:1917607]	33629339	33993152	5
ENSMUSG00000036880	0.0909244	0.845439	1.12099	7.55199e-05	Acaa2	acetyl-Coenzyme A acyltransferase 2 (mitochondrial 3-oxoacyl-Coenzyme A thiolase) [Source:MGI Symbol;Acc:MGI:1098623]	74779197	74806208	2
ENSMUSG00000020609	0.245655	0.733996	1.84934	7.55199e-05	Apob	apolipoprotein B [Source:MGI Symbol;Acc:MGI:88052]	7977648	8016835	4
ENSMUSG00000069806	0.173348	0.734227	1.3974	7.55921e-05	Cacng7	calcium channel, voltage-dependent, gamma subunit 7 [Source:MGI Symbol;Acc:MGI:1932374]	3332955	3368221	2
ENSMUSG00000020427	-0.116977	0.888421	1.94639	7.55921e-05	Igfbp3	insulin-like growth factor binding protein 3 [Source:MGI Symbol;Acc:MGI:96438]	7206086	7213923	2
ENSMUSG00000061959	0.307055	0.669351	1.95227	7.68407e-05	Ces1e	carboxylesterase 1E [Source:MGI Symbol;Acc:MGI:95432]	93201218	93229619	3
ENSMUSG00000055963	0.354408	0.406647	1.27619	7.73897e-05	Triqk	triple QxxK/R motif containing [Source:MGI Symbol;Acc:MGI:3650048]	12906838	12983553	3
ENSMUSG00000078963	0.448781	0.537473	2.12649	7.83554e-05	Hsbp1l1	heat shock factor binding protein 1-like 1 [Source:MGI Symbol;Acc:MGI:1913505]	80229758	80247102	2
ENSMUSG00000059447	0.13336	0.484927	0.546537	7.84088e-05	Hadhb	hydroxyacyl-Coenzyme A dehydrogenase/3-ketoacyl-Coenzyme A thiolase/enoyl-Coenzyme A hydratase (trifunctional protein), beta subunit [Source:MGI Symbol;Acc:MGI:2136381]	30155248	30184593	9
ENSMUSG00000062444	-0.412752	0.597783	2.47248	7.98275e-05	Ap3b2	adaptor-related protein complex 3, beta 2 subunit [Source:MGI Symbol;Acc:MGI:1100869]	81460399	81493925	5
ENSMUSG00000030782	0.273171	0.443067	1.03821	8.00592e-05	Tgfb1i1	transforming growth factor beta 1 induced transcript 1 [Source:MGI Symbol;Acc:MGI:102784]	128246812	128255699	13
ENSMUSG00000021908	0.00237679	0.995156	0.714693	8.08093e-05	Gm6768	predicted gene 6768 [Source:MGI Symbol;Acc:MGI:3648259]	119260978	119262855	1
ENSMUSG00000109685	0.242512	0.515545	1.06134	8.1047e-05	Gm45912	predicted gene 45912 [Source:MGI Symbol;Acc:MGI:5805027]	105823264	105823806	1
ENSMUSG00000020218	-0.253221	0.658448	1.6519	8.1047e-05	Wif1	Wnt inhibitory factor 1 [Source:MGI Symbol;Acc:MGI:1344332]	121033960	121100650	3
ENSMUSG00000028134	0.444906	0.0437422	0.71412	8.16351e-05	Ptbp2	polypyrimidine tract binding protein 2 [Source:MGI Symbol;Acc:MGI:1860489]	119718742	119784466	13
ENSMUSG00000047793	0.305337	0.521336	1.35366	8.40562e-05	Sned1	sushi, nidogen and EGF-like domains 1 [Source:MGI Symbol;Acc:MGI:3045960]	93235841	93301065	6
ENSMUSG00000111176	1.00155	0.0757433	1.93696	8.42946e-05	Gm47233	predicted gene, 47233 [Source:MGI Symbol;Acc:MGI:6096050]	70069867	70072034	1
ENSMUSG00000001510	0.178889	0.930859	5.44194	8.42946e-05	Dlx3	distal-less homeobox 3 [Source:MGI Symbol;Acc:MGI:94903]	95120119	95125296	1
ENSMUSG00000062908	0.0365387	0.911241	0.7367	8.52754e-05	Acadm	acyl-Coenzyme A dehydrogenase, medium chain [Source:MGI Symbol;Acc:MGI:87867]	153922357	153944632	10
ENSMUSG00000054619	-0.18587	0.740809	1.42016	8.6278e-05	Mettl7a1	methyltransferase like 7A1 [Source:MGI Symbol;Acc:MGI:1916523]	100304140	100328662	8
ENSMUSG00000038168	0.116335	0.842737	1.42102	8.63467e-05	P3h2	prolyl 3-hydroxylase 2 [Source:MGI Symbol;Acc:MGI:2146663]	25959288	26105784	4
ENSMUSG00000040209	-0.239947	0.302495	0.701135	8.6988e-05	Zfp704	zinc finger protein 704 [Source:MGI Symbol;Acc:MGI:2180715]	9427020	9610085	3
ENSMUSG00000026768	0.176451	0.69432	1.19899	8.74055e-05	Itga8	integrin alpha 8 [Source:MGI Symbol;Acc:MGI:109442]	12106632	12301922	7
ENSMUSG00000027428	0.20528	0.37436	0.688673	8.91991e-05	Rbbp9	retinoblastoma binding protein 9, serine hydrolase [Source:MGI Symbol;Acc:MGI:1347074]	144542265	144550869	2
ENSMUSG00000092083	0.421049	0.563068	2.14658	9.03768e-05	Kcnb2	potassium voltage gated channel, Shab-related subfamily, member 2 [Source:MGI Symbol;Acc:MGI:99632]	15287254	15723750	2
ENSMUSG00000032179	0.0603786	0.940065	1.76443	9.55778e-05	Bmp5	bone morphogenetic protein 5 [Source:MGI Symbol;Acc:MGI:88181]	75775364	75900310	2
ENSMUSG00000029563	0.494498	0.231905	1.26026	9.62098e-05	Foxp2	forkhead box P2 [Source:MGI Symbol;Acc:MGI:2148705]	14901349	15441977	20
ENSMUSG00000039958	0.358164	0.242762	0.933699	9.66276e-05	Etfbkmt	electron transfer flavoprotein beta subunit lysine methyltransferase [Source:MGI Symbol;Acc:MGI:2443575]	149139849	149151171	9
ENSMUSG00000037295	-0.180167	0.150137	-0.39065	9.77204e-05	Ldlrap1	low density lipoprotein receptor adaptor protein 1 [Source:MGI Symbol;Acc:MGI:2140175]	134741554	134768024	3
ENSMUSG00000034687	0.30497	0.549372	1.50005	9.77204e-05	Fras1	Fraser extracellular matrix complex subunit 1 [Source:MGI Symbol;Acc:MGI:2385368]	96373955	96784728	6
ENSMUSG00000023336	0.330069	0.486124	1.34599	9.81401e-05	Wfdc1	WAP four-disulfide core domain 1 [Source:MGI Symbol;Acc:MGI:1915116]	119666365	119688222	2
ENSMUSG00000027858	0.457908	0.180683	1.05692	0.000100788	Tspan2	tetraspanin 2 [Source:MGI Symbol;Acc:MGI:1917997]	102734529	102801513	4
ENSMUSG00000038721	0.892404	0.0216603	1.32043	0.000100788	Hoxb7	homeobox B7 [Source:MGI Symbol;Acc:MGI:96188]	96286623	96290162	2
ENSMUSG00000023800	0.309037	0.35543	0.994308	0.000100788	Tiam2	T cell lymphoma invasion and metastasis 2 [Source:MGI Symbol;Acc:MGI:1344338]	3326573	3531344	9
ENSMUSG00000025978	0.125598	0.836794	1.47878	0.000100788	Rftn2	raftlin family member 2 [Source:MGI Symbol;Acc:MGI:1921263]	55170159	55226782	5
ENSMUSG00000031952			4.41642	0.000100788	Chst5	carbohydrate (N-acetylglucosamine 6-O) sulfotransferase 5 [Source:MGI Symbol;Acc:MGI:1931825]	111889136	111910447	1
ENSMUSG00000038393	-0.0283261	0.960471	1.22168	0.000101232	Txnip	thioredoxin interacting protein [Source:MGI Symbol;Acc:MGI:1889549]	96557957	96561883	6
ENSMUSG00000030222	0.112464	0.80003	1.09912	0.000104147	Rerg	RAS-like, estrogen-regulated, growth-inhibitor [Source:MGI Symbol;Acc:MGI:2665139]	137054825	137170497	5
ENSMUSG00000027273	-0.0175886	0.982608	1.60121	0.000104871	Snap25	synaptosomal-associated protein 25 [Source:MGI Symbol;Acc:MGI:98331]	136713453	136782428	3
ENSMUSG00000042498	0.205963	0.757787	1.67503	0.000105046	D330045A20Rik	RIKEN cDNA D330045A20 gene [Source:MGI Symbol;Acc:MGI:2147848]	139480367	139554582	3
ENSMUSG00000060176	0.721009	0.433232	2.86746	0.000105046	Kif27	kinesin family member 27 [Source:MGI Symbol;Acc:MGI:1922300]	58287502	58359122	4
ENSMUSG00000029260	0.24438	0.528345	1.08063	0.000105743	Ugt2b34	UDP glucuronosyltransferase 2 family, polypeptide B34 [Source:MGI Symbol;Acc:MGI:2140962]	86889767	86906937	2
ENSMUSG00000018800	0.281724	0.403139	1.00232	0.000106419	Abca5	ATP-binding cassette, sub-family A (ABC1), member 5 [Source:MGI Symbol;Acc:MGI:2386607]	110269369	110337716	5
ENSMUSG00000043631	0.566364	0.24691	1.48929	0.000106906	Ecm2	extracellular matrix protein 2, female organ and adipocyte specific [Source:MGI Symbol;Acc:MGI:3039578]	49504810	49532789	2
ENSMUSG00000015202	0.1644	0.780273	1.43965	0.000107123	Cnksr3	Cnksr family member 3 [Source:MGI Symbol;Acc:MGI:2674130]	7119063	7212237	2
ENSMUSG00000055567	0.184098	0.793329	1.80166	0.000107123	Unc80	unc-80, NALCN activator [Source:MGI Symbol;Acc:MGI:2652882]	66468367	66699148	6
ENSMUSG00000057396	0.405685	0.168553	0.916485	0.000108534	Zfp759	zinc finger protein 759 [Source:MGI Symbol;Acc:MGI:2446280]	67121660	67141787	3
ENSMUSG00000035506	-0.413543	0.297326	1.17989	0.000109077	Slc12a8	solute carrier family 12 (potassium/chloride transporters), member 8 [Source:MGI Symbol;Acc:MGI:2443672]	33517328	33664135	7
ENSMUSG00000027674	-0.174835	0.843108	2.18361	0.000110028	Pex5l	peroxisomal biogenesis factor 5-like [Source:MGI Symbol;Acc:MGI:1916672]	32949408	33143247	12
ENSMUSG00000024083	-0.00447718	0.987185	0.573404	0.000111259	Pja2	praja ring finger ubiquitin ligase 2 [Source:MGI Symbol;Acc:MGI:2159342]	64281005	64331916	5
ENSMUSG00000036473	0.124193	0.79353	1.15385	0.000111273	Tbc1d24	TBC1 domain family, member 24 [Source:MGI Symbol;Acc:MGI:2443456]	24175431	24205562	15
ENSMUSG00000039701	0.239769	0.404759	0.830534	0.000111273	Usp53	ubiquitin specific peptidase 53 [Source:MGI Symbol;Acc:MGI:2139607]	122931493	122984510	10
ENSMUSG00000089769	0.526626	0.308082	1.70338	0.000111315	Gm16574	predicted gene 16574 [Source:MGI Symbol;Acc:MGI:4414994]	12818793	12819537	1
ENSMUSG00000043496	-0.0350445	0.966594	1.79954	0.000111731	Tril	TLR4 interactor with leucine-rich repeats [Source:MGI Symbol;Acc:MGI:1914123]	53815468	53820830	1
ENSMUSG00000028373	-0.0143661	0.988074	2.34106	0.000112477	Astn2	astrotactin 2 [Source:MGI Symbol;Acc:MGI:1889277]	65380803	66404611	2
ENSMUSG00000041930	-0.128219	0.868686	1.88381	0.000113016	Fam222a	family with sequence similarity 222, member A [Source:MGI Symbol;Acc:MGI:3605543]	114568016	114613220	2
ENSMUSG00000023921	0.103299	0.635543	0.580504	0.000113016	Mut	methylmalonyl-Coenzyme A mutase [Source:MGI Symbol;Acc:MGI:97239]	40934685	40961988	2
ENSMUSG00000064373	0.267769	0.681019	1.69018	0.000113016	Selenop	selenoprotein P [Source:MGI Symbol;Acc:MGI:894288]	3268547	3280508	7
ENSMUSG00000004151	0.231853	0.616384	1.25818	0.000113016	Etv1	ets variant 1 [Source:MGI Symbol;Acc:MGI:99254]	38779380	38870484	13
ENSMUSG00000026828	-0.224137	0.568102	1.08321	0.000113342	Galnt5	polypeptide N-acetylgalactosaminyltransferase 5 [Source:MGI Symbol;Acc:MGI:2179403]	57997884	58045860	3
ENSMUSG00000021684	0.057607	0.884362	0.92139	0.000113342	Pde8b	phosphodiesterase 8B [Source:MGI Symbol;Acc:MGI:2443999]	95024454	95250336	14
ENSMUSG00000034701	-0.0455175	0.949266	1.63908	0.000114639	Neurod1	neurogenic differentiation 1 [Source:MGI Symbol;Acc:MGI:1339708]	79452521	79456751	1
ENSMUSG00000021846	-0.184212	0.773538	1.56795	0.000115744	Peli2	pellino 2 [Source:MGI Symbol;Acc:MGI:1891445]	48120823	48281575	8
ENSMUSG00000025348	0.168838	0.614312	0.899904	0.000115923	Itga7	integrin alpha 7 [Source:MGI Symbol;Acc:MGI:102700]	128933818	128958282	5
ENSMUSG00000028004	0.903525	0.109448	1.91074	0.000116656	Npy2r	neuropeptide Y receptor Y2 [Source:MGI Symbol;Acc:MGI:108418]	82538383	82548084	4
ENSMUSG00000031586	0.353351	0.239529	0.902828	0.000116656	Rbpms	RNA binding protein gene with multiple splicing [Source:MGI Symbol;Acc:MGI:1334446]	33782643	33929863	15
ENSMUSG00000049115	0.531584	0.345905	1.72408	0.000116656	Agtr1a	angiotensin II receptor, type 1a [Source:MGI Symbol;Acc:MGI:87964]	30336441	30382867	6
ENSMUSG00000026888	0.390688	0.369837	1.28387	0.000116918	Grb14	growth factor receptor bound protein 14 [Source:MGI Symbol;Acc:MGI:1355324]	64912476	65024987	8
ENSMUSG00000049624	-0.0110012	0.97835	0.821271	0.000117996	Slc17a5	solute carrier family 17 (anion/sugar transporter), member 5 [Source:MGI Symbol;Acc:MGI:1924105]	78536488	78588041	3
ENSMUSG00000038173	0.344906	0.721039	2.65677	0.00011945	Enpp6	ectonucleotide pyrophosphatase/phosphodiesterase 6 [Source:MGI Symbol;Acc:MGI:2445171]	46986887	47096762	6
ENSMUSG00000115151	1.01374	0.460743	4.34228	0.00011945	Gm19276	predicted gene, 19276 [Source:MGI Symbol;Acc:MGI:5011461]	10814792	10835214	2
ENSMUSG00000034320	-0.151665	0.81892	1.56552	0.000121244	Slc26a2	solute carrier family 26 (sulfate transporter), member 2 [Source:MGI Symbol;Acc:MGI:892977]	61192919	61211612	4
ENSMUSG00000011171	-0.00473868	0.994478	1.28967	0.000121399	Vipr2	vasoactive intestinal peptide receptor 2 [Source:MGI Symbol;Acc:MGI:107166]	116077726	116146261	6
ENSMUSG00000027452	-0.0068797	0.989617	1.11027	0.00012402	Acss1	acyl-CoA synthetase short-chain family member 1 [Source:MGI Symbol;Acc:MGI:1915988]	150618105	150668500	5
ENSMUSG00000050199	-0.111937	0.561341	0.524828	0.00012402	Lgr4	leucine-rich repeat-containing G protein-coupled receptor 4 [Source:MGI Symbol;Acc:MGI:1891468]	109917647	110014257	4
ENSMUSG00000029236	0.598055	0.501781	2.53462	0.000124836	Nmu	neuromedin U [Source:MGI Symbol;Acc:MGI:1860476]	76333495	76363788	1
ENSMUSG00000052534	0.0225649	0.950527	0.782539	0.000124988	Pbx1	pre B cell leukemia homeobox 1 [Source:MGI Symbol;Acc:MGI:97495]	168119364	168432270	8
ENSMUSG00000047507	-0.191674	0.735695	1.47817	0.000126904	Baiap3	BAI1-associated protein 3 [Source:MGI Symbol;Acc:MGI:2685783]	25242659	25256364	9
ENSMUSG00000029088	0.476628	0.214465	1.18029	0.000127349	Kcnip4	Kv channel interacting protein 4 [Source:MGI Symbol;Acc:MGI:1933131]	48389502	49524907	8
ENSMUSG00000038828	-0.194018	0.169258	-0.429028	0.000127484	Tmem214	transmembrane protein 214 [Source:MGI Symbol;Acc:MGI:1916046]	30868012	30879180	7
ENSMUSG00000026322	-0.107446	0.850731	1.34119	0.000128312	Htr4	5 hydroxytryptamine (serotonin) receptor 4 [Source:MGI Symbol;Acc:MGI:109246]	62324204	62496577	4
ENSMUSG00000055639	0.0791918	0.92169	1.81259	0.000128312	Dach1	dachshund family transcription factor 1 [Source:MGI Symbol;Acc:MGI:1277991]	97786853	98169765	3
ENSMUSG00000032773	-0.452092	0.473505	1.83306	0.000129068	Chrm1	cholinergic receptor, muscarinic 1, CNS [Source:MGI Symbol;Acc:MGI:88396]	8663789	8683587	3
ENSMUSG00000054580	0.395335	0.192478	0.932163	0.000130867	Pla2r1	phospholipase A2 receptor 1 [Source:MGI Symbol;Acc:MGI:102468]	60417543	60553308	6
ENSMUSG00000036896	0.0538067	0.830893	-0.58991	0.000130972	C1qc	complement component 1, q subcomponent, C chain [Source:MGI Symbol;Acc:MGI:88225]	136889804	136893065	2
ENSMUSG00000001225	0.394224	0.625484	2.13202	0.000130973	Slc26a3	solute carrier family 26, member 3 [Source:MGI Symbol;Acc:MGI:107181]	31390871	31473917	7
ENSMUSG00000046743	0.0648614	0.922546	1.4594	0.000131461	Fat4	FAT atypical cadherin 4 [Source:MGI Symbol;Acc:MGI:3045256]	38886940	39011985	2
ENSMUSG00000051652	0.388925	0.384611	1.3034	0.000131461	Lrrc3	leucine rich repeat containing 3 [Source:MGI Symbol;Acc:MGI:2447899]	77897575	77902536	1
ENSMUSG00000061414	0.19993	0.65052	1.15406	0.000131461	Cracr2a	calcium release activated channel regulator 2A [Source:MGI Symbol;Acc:MGI:2685919]	127561338	127674248	3
ENSMUSG00000109841	0.66956	0.273471	1.8979	0.000132931	E330011O21Rik	RIKEN cDNA E330011O21 gene [Source:MGI Symbol;Acc:MGI:3759668]	78250861	78302487	14
ENSMUSG00000039167	0.0842063	0.886641	1.36086	0.00013326	Adgrl4	adhesion G protein-coupled receptor L4 [Source:MGI Symbol;Acc:MGI:2655562]	151437887	151545086	6
ENSMUSG00000022123	-0.338398	0.459744	1.34307	0.000134101	Scel	sciellin [Source:MGI Symbol;Acc:MGI:1891228]	103513342	103612797	2
ENSMUSG00000028003	0.589967	0.384611	1.97063	0.000134592	Lrat	lecithin-retinol acyltransferase (phosphatidylcholine-retinol-O-acyltransferase) [Source:MGI Symbol;Acc:MGI:1891259]	82892579	82903973	1
ENSMUSG00000027800	0.385663	0.24905	0.997429	0.000134592	Tm4sf1	transmembrane 4 superfamily member 1 [Source:MGI Symbol;Acc:MGI:104678]	57285611	57301988	6
ENSMUSG00000058070	0.259354	0.510284	1.08837	0.000135476	Eml1	echinoderm microtubule associated protein like 1 [Source:MGI Symbol;Acc:MGI:1915769]	108370957	108539617	8
ENSMUSG00000038370	0.356409	0.316107	1.03424	0.000135555	Pcp4l1	Purkinje cell protein 4-like 1 [Source:MGI Symbol;Acc:MGI:1913675]	171173262	171196268	1
ENSMUSG00000081303	-0.105529	0.881966	1.71107	0.000135555	Gm16011	predicted gene 16011 [Source:MGI Symbol;Acc:MGI:3801796]	45426845	45429506	1
ENSMUSG00000062098	0.00369572	0.987365	0.479528	0.000135755	Btbd3	BTB (POZ) domain containing 3 [Source:MGI Symbol;Acc:MGI:2385155]	138256565	138589292	4
ENSMUSG00000066842	-0.202096	0.754044	1.59144	0.000135755	Hmcn1	hemicentin 1 [Source:MGI Symbol;Acc:MGI:2685047]	150562524	150993435	6
ENSMUSG00000039653	0.824002	0.218368	2.06437	0.000137072	Baat	bile acid-Coenzyme A: amino acid N-acyltransferase [Source:MGI Symbol;Acc:MGI:106642]	49489422	49506557	2
ENSMUSG00000110277	0.681237	0.0429499	1.05789	0.000137774	Gm45871	predicted gene 45871 [Source:MGI Symbol;Acc:MGI:5804986]	90579777	90592528	4
ENSMUSG00000041301	-0.145175	0.616482	0.76684	0.000138104	Cftr	cystic fibrosis transmembrane conductance regulator [Source:MGI Symbol;Acc:MGI:88388]	18170687	18322768	6
ENSMUSG00000073557	0.257119	0.49617	1.04347	0.000138104	Ppp1r12b	protein phosphatase 1, regulatory subunit 12B [Source:MGI Symbol;Acc:MGI:1916417]	134754658	134955942	10
ENSMUSG00000020978	0.0772522	0.544683	0.353038	0.000139823	Klhdc2	kelch domain containing 2 [Source:MGI Symbol;Acc:MGI:1916804]	69296681	69310687	4
ENSMUSG00000011008	0.0837592	0.720184	0.590371	0.000139823	Mcoln2	mucolipin 2 [Source:MGI Symbol;Acc:MGI:1915529]	146149833	146195513	5
ENSMUSG00000048038	0.969707	0.179545	2.21336	0.000142261	Ccdc187	coiled-coil domain containing 187 [Source:MGI Symbol;Acc:MGI:3045295]	26243469	26294557	3
ENSMUSG00000024228	-0.0263825	0.906316	0.50649	0.000143418	Nudt12	nudix (nucleoside diphosphate linked moiety X)-type motif 12 [Source:MGI Symbol;Acc:MGI:1915243]	58999618	59013372	3
ENSMUSG00000014177	0.179289	0.307578	0.510761	0.000145369	Tvp23b	trans-golgi network vesicle protein 23B [Source:MGI Symbol;Acc:MGI:1914760]	62879455	62916780	4
ENSMUSG00000036782	0.499448	0.283415	1.38421	0.000147486	Klhl13	kelch-like 13 [Source:MGI Symbol;Acc:MGI:1914705]	23219271	23365082	7
ENSMUSG00000029636	0.387833	0.352057	1.20821	0.000147569	Wasf3	WAS protein family, member 3 [Source:MGI Symbol;Acc:MGI:2658986]	146384985	146473615	1
ENSMUSG00000036334	0.0852521	0.91869	1.82008	0.000148478	Igsf10	immunoglobulin superfamily, member 10 [Source:MGI Symbol;Acc:MGI:1923481]	59316735	59344394	4
ENSMUSG00000021919	-0.408459	0.581265	2.91863	0.000149448	Chat	choline acetyltransferase [Source:MGI Symbol;Acc:MGI:88392]	32408203	32465989	8
ENSMUSG00000032827	0.362598	0.320869	1.05743	0.000150883	Ppp1r9a	protein phosphatase 1, regulatory subunit 9A [Source:MGI Symbol;Acc:MGI:2442401]	4902917	5165661	12
ENSMUSG00000038916	0.0696008	0.927457	2.21201	0.000150883	Soga3	SOGA family member 3 [Source:MGI Symbol;Acc:MGI:1914662]	29143839	29199630	5
ENSMUSG00000058921	0.171077	0.711197	1.16361	0.000150979	Slc10a5	solute carrier family 10 (sodium/bile acid cotransporter family), member 5 [Source:MGI Symbol;Acc:MGI:2685251]	10331734	10335656	1
ENSMUSG00000001985	-0.233426	0.736868	1.76202	0.000150979	Grik3	glutamate receptor, ionotropic, kainate 3 [Source:MGI Symbol;Acc:MGI:95816]	125490700	125714173	1
ENSMUSG00000057182	-0.177049	0.737187	1.3793	0.000150979	Scn3a	sodium channel, voltage-gated, type III, alpha [Source:MGI Symbol;Acc:MGI:98249]	65457118	65567627	4
ENSMUSG00000010175	0.305154	0.166872	0.678293	0.000151725	Prox1	prospero homeobox 1 [Source:MGI Symbol;Acc:MGI:97772]	190118035	190170714	3
ENSMUSG00000047557	-0.0369826	0.875737	-0.534078	0.000151725	Lxn	latexin [Source:MGI Symbol;Acc:MGI:107633]	67457998	67463926	3
ENSMUSG00000031980	-0.366912	0.616632	1.95302	0.000152692	Agt	angiotensinogen (serpin peptidase inhibitor, clade A, member 8) [Source:MGI Symbol;Acc:MGI:87963]	124556534	124569706	1
ENSMUSG00000039246	0.080052	0.727824	0.591894	0.000152692	Lyplal1	lysophospholipase-like 1 [Source:MGI Symbol;Acc:MGI:2385115]	186087731	186117310	2
ENSMUSG00000019772	0.32704	0.527956	1.41721	0.0001534	Vip	vasoactive intestinal polypeptide [Source:MGI Symbol;Acc:MGI:98933]	5639218	5647617	2
ENSMUSG00000032024	0.208528	0.625946	1.12025	0.000155958	Clmp	CXADR-like membrane protein [Source:MGI Symbol;Acc:MGI:1918816]	40685962	40785319	4
ENSMUSG00000061100	0.450698	0.546118	2.03543	0.000156698	Retnla	resistin like alpha [Source:MGI Symbol;Acc:MGI:1888504]	48842551	48844461	1
ENSMUSG00000097767	0.015308	0.985467	1.70604	0.000163759	Miat	myocardial infarction associated transcript (non-protein coding) [Source:MGI Symbol;Acc:MGI:2444886]	112213228	112229395	6
ENSMUSG00000030246	0.360692	0.421001	1.26733	0.000163841	Ldhb	lactate dehydrogenase B [Source:MGI Symbol;Acc:MGI:96763]	142490249	142507957	4
ENSMUSG00000060227	0.414811	0.238099	1.04049	0.000163878	Casc4	cancer susceptibility candidate 4 [Source:MGI Symbol;Acc:MGI:2443129]	121866970	121936220	8
ENSMUSG00000020052	-0.48992	0.567544	2.9936	0.000163878	Ascl1	achaete-scute family bHLH transcription factor 1 [Source:MGI Symbol;Acc:MGI:96919]	87490819	87493660	1
ENSMUSG00000048027	0.0226236	0.945411	0.698758	0.000165583	Rgmb	repulsive guidance molecule family member B [Source:MGI Symbol;Acc:MGI:1916049]	15803188	15831039	7
ENSMUSG00000046519	0.188804	0.539362	0.832146	0.000166184	Golph3l	golgi phosphoprotein 3-like [Source:MGI Symbol;Acc:MGI:1917129]	95588934	95619247	8
ENSMUSG00000041670	0.2905	0.576074	1.39677	0.000167739	Rims1	regulating synaptic membrane exocytosis 1 [Source:MGI Symbol;Acc:MGI:2152971]	22286251	22805994	9
ENSMUSG00000031636	0.284645	0.518674	1.20058	0.000168069	Pdlim3	PDZ and LIM domain 3 [Source:MGI Symbol;Acc:MGI:1859274]	45885461	45919548	4
ENSMUSG00000036585	-0.106884	0.828923	1.14948	0.000169585	Fgf1	fibroblast growth factor 1 [Source:MGI Symbol;Acc:MGI:95515]	38838673	38929472	11
ENSMUSG00000011831	0.18219	0.215358	0.435971	0.000169585	Evi5	ecotropic viral integration site 5 [Source:MGI Symbol;Acc:MGI:104736]	107744795	107875107	13
ENSMUSG00000053897	0.342194	0.070543	0.583343	0.000169855	Slc39a8	solute carrier family 39 (metal ion transporter), member 8 [Source:MGI Symbol;Acc:MGI:1914797]	135825279	135888572	6
ENSMUSG00000053441	0.589626	0.434223	2.23055	0.000169855	Adamts19	a disintegrin-like and metallopeptidase (reprolysin type) with thrombospondin type 1 motif, 19 [Source:MGI Symbol;Acc:MGI:2442875]	58836667	59054060	4
ENSMUSG00000019906	0.468648	0.767265	4.23001	0.000169855	Lin7a	lin-7 homolog A (C. elegans) [Source:MGI Symbol;Acc:MGI:2135609]	107271686	107421474	3
ENSMUSG00000044948	-0.0508691	0.856281	-0.637729	0.000170164	Cfap43	cilia and flagella associated protein 43 [Source:MGI Symbol;Acc:MGI:1289258]	47736857	47919287	7
ENSMUSG00000043003	0.166302	0.550326	0.749516	0.000170856	Rasef	RAS and EF hand domain containing [Source:MGI Symbol;Acc:MGI:2448565]	73714579	73790994	3
ENSMUSG00000005897	0.0113328	0.975782	0.749224	0.00017141	Nr2c1	nuclear receptor subfamily 2, group C, member 1 [Source:MGI Symbol;Acc:MGI:1352465]	94148023	94197211	3
ENSMUSG00000021236	0.00261092	0.995747	0.851042	0.000171691	Entpd5	ectonucleoside triphosphate diphosphohydrolase 5 [Source:MGI Symbol;Acc:MGI:1321385]	84373857	84409029	8
ENSMUSG00000073982	-0.301393	0.210186	-0.707066	0.000174514	Rhog	ras homolog family member G [Source:MGI Symbol;Acc:MGI:1928370]	102239123	102256054	3
ENSMUSG00000030935	-0.064718	0.926204	1.48983	0.000177772	Acsm3	acyl-CoA synthetase medium-chain family member 3 [Source:MGI Symbol;Acc:MGI:99538]	119760923	119787513	8
ENSMUSG00000039601	0.119104	0.887085	1.91997	0.000178218	Rcan2	regulator of calcineurin 2 [Source:MGI Symbol;Acc:MGI:1858219]	43801351	44039516	7
ENSMUSG00000022235	0.395949	0.119822	0.770447	0.000178507	Cmbl	carboxymethylenebutenolidase-like (Pseudomonas) [Source:MGI Symbol;Acc:MGI:1916824]	31565389	31590119	4
ENSMUSG00000026634	0.0241939	0.883549	0.369921	0.000178659	Angel2	angel homolog 2 [Source:MGI Symbol;Acc:MGI:1196310]	190925112	190946962	10
ENSMUSG00000027210	0.258116	0.479313	1.00578	0.000180918	Meis2	Meis homeobox 2 [Source:MGI Symbol;Acc:MGI:108564]	115863064	116065839	19
ENSMUSG00000062760	0.411428	0.457151	1.53409	0.000181955	Shisal1	shisa like 1 [Source:MGI Symbol;Acc:MGI:1919551]	84379203	84447097	4
ENSMUSG00000053062	0.229242	0.613435	1.19282	0.000182147	Jam2	junction adhesion molecule 2 [Source:MGI Symbol;Acc:MGI:1933820]	84774123	84825928	4
ENSMUSG00000058056	0.169	0.579382	0.807719	0.000182147	Palld	palladin, cytoskeletal associated protein [Source:MGI Symbol;Acc:MGI:1919583]	61511433	61902690	9
ENSMUSG00000031099	0.787775	0.0937235	1.47002	0.000182594	Smarca1	SWI/SNF related, matrix associated, actin dependent regulator of chromatin, subfamily a, member 1 [Source:MGI Symbol;Acc:MGI:1935127]	47809368	47892974	7
ENSMUSG00000029161	0.205904	0.464993	0.777061	0.000183367	Cgref1	cell growth regulator with EF hand domain 1 [Source:MGI Symbol;Acc:MGI:1915817]	30933143	30945591	2
ENSMUSG00000008892	0.186252	0.358181	0.571721	0.000183587	Vdac3	voltage-dependent anion channel 3 [Source:MGI Symbol;Acc:MGI:106922]	22577075	22593813	4
ENSMUSG00000032047	0.0496706	0.798709	0.457062	0.000184654	Acat1	acetyl-Coenzyme A acetyltransferase 1 [Source:MGI Symbol;Acc:MGI:87870]	53580522	53610382	3
ENSMUSG00000039178	0.144107	0.71172	0.981846	0.000184654	Tbc1d19	TBC1 domain family, member 19 [Source:MGI Symbol;Acc:MGI:1914499]	53809606	53903965	9
ENSMUSG00000039579	0.503425	0.318407	1.4764	0.000184654	Grin3a	glutamate receptor ionotropic, NMDA3A [Source:MGI Symbol;Acc:MGI:1933206]	49661611	49845744	4
ENSMUSG00000027562	0.0107614	0.978261	0.772184	0.000184658	Car2	carbonic anhydrase 2 [Source:MGI Symbol;Acc:MGI:88269]	14886273	14900770	3
ENSMUSG00000046613	-0.275438	0.522438	1.22659	0.000187099	Vwa5b2	von Willebrand factor A domain containing 5B2 [Source:MGI Symbol;Acc:MGI:2681859]	20589471	20605377	13
ENSMUSG00000022358	-0.103362	0.887348	1.61605	0.000187725	Fbxo32	F-box protein 32 [Source:MGI Symbol;Acc:MGI:1914981]	58175879	58214932	1
ENSMUSG00000026360	0.577876	0.0653996	0.958667	0.000187725	Rgs2	regulator of G-protein signaling 2 [Source:MGI Symbol;Acc:MGI:1098271]	143999338	144004161	4
ENSMUSG00000089960	0.739852	0.524305	3.13977	0.000187725	Ugt1a1	UDP glucuronosyltransferase 1 family, polypeptide A1 [Source:MGI Symbol;Acc:MGI:98898]	88211959	88218997	1
ENSMUSG00000019943	0.0338667	0.922159	0.735121	0.000187725	Atp2b1	ATPase, Ca++ transporting, plasma membrane 1 [Source:MGI Symbol;Acc:MGI:104653]	98914406	99026143	11
ENSMUSG00000047414	1.04895	0.151396	2.20293	0.000187938	Flrt2	fibronectin leucine rich transmembrane protein 2 [Source:MGI Symbol;Acc:MGI:3603594]	95692226	95785215	2
ENSMUSG00000015027	-0.239013	0.206149	-0.55419	0.000187938	Galns	galactosamine (N-acetyl)-6-sulfate sulfatase [Source:MGI Symbol;Acc:MGI:1355303]	122578242	122611463	3
ENSMUSG00000036570	0.418597	0.288484	1.13306	0.000188083	Fxyd1	FXYD domain-containing ion transport regulator 1 [Source:MGI Symbol;Acc:MGI:1889273]	31051678	31057199	17
ENSMUSG00000040998	0.641953	0.0468399	1.00924	0.000188083	Npnt	nephronectin [Source:MGI Symbol;Acc:MGI:2148811]	132881745	132950291	7
ENSMUSG00000031849	0.401981	0.796655	4.63977	0.000188083	Comp	cartilage oligomeric matrix protein [Source:MGI Symbol;Acc:MGI:88469]	70373558	70382066	4
ENSMUSG00000069072	0.239943	0.688315	1.60556	0.000188083	Slc7a14	solute carrier family 7 (cationic amino acid transporter, y+ system), member 14 [Source:MGI Symbol;Acc:MGI:3040688]	31202858	31310378	2
ENSMUSG00000034336	-0.146643	0.824131	2.08602	0.000190216	Ina	internexin neuronal intermediate filament protein, alpha [Source:MGI Symbol;Acc:MGI:96568]	47014698	47025327	1
ENSMUSG00000024990	0.110381	0.81845	1.11661	0.000193878	Rbp4	retinol binding protein 4, plasma [Source:MGI Symbol;Acc:MGI:97879]	38116629	38125281	4
ENSMUSG00000021785	0.190615	0.180683	0.421631	0.000193878	Ngly1	N-glycanase 1 [Source:MGI Symbol;Acc:MGI:1913276]	16249280	16311926	8
ENSMUSG00000040852	0.277801	0.267222	0.724159	0.000194006	Plekhh2	pleckstrin homology domain containing, family H (with MyTH4 domain) member 2 [Source:MGI Symbol;Acc:MGI:2146813]	84511895	84622138	3
ENSMUSG00000095253	0.0750337	0.810706	0.733271	0.000194427	Zfp799	zinc finger protein 799 [Source:MGI Symbol;Acc:MGI:2443934]	32815449	32830261	5
ENSMUSG00000049988	0.0691374	0.858008	-0.862387	0.000194427	Lrrc25	leucine rich repeat containing 25 [Source:MGI Symbol;Acc:MGI:2445284]	70616155	70621483	2
ENSMUSG00000030424	0.192987	0.479293	0.756385	0.000195589	Zfp939	zinc finger protein 939 [Source:MGI Symbol;Acc:MGI:3036240]	39449518	39477413	2
ENSMUSG00000007655	0.347403	0.398977	1.14827	0.000195589	Cav1	caveolin 1, caveolae protein [Source:MGI Symbol;Acc:MGI:102709]	17306335	17341452	10
ENSMUSG00000024261	0.241724	0.681792	1.54246	0.000197839	Syt4	synaptotagmin IV [Source:MGI Symbol;Acc:MGI:101759]	31437808	31447406	1
ENSMUSG00000023963	-0.177034	0.548422	0.795562	0.00019857	Cyp39a1	cytochrome P450, family 39, subfamily a, polypeptide 1 [Source:MGI Symbol;Acc:MGI:1927096]	43667425	43751431	4
ENSMUSG00000036905	-0.00477069	0.987185	-0.590186	0.00019857	C1qb	complement component 1, q subcomponent, beta polypeptide [Source:MGI Symbol;Acc:MGI:88224]	136880129	136886187	1
ENSMUSG00000021638	-0.058511	0.856002	0.728576	0.0001996	Ocln	occludin [Source:MGI Symbol;Acc:MGI:106183]	100496507	100552718	5
ENSMUSG00000035184	0.483781	0.184353	1.07859	0.000205298	Fam124a	family with sequence similarity 124, member A [Source:MGI Symbol;Acc:MGI:3645930]	62555737	62608486	4
ENSMUSG00000003949	0.783413	0.159475	1.67409	0.000206488	Hlf	hepatic leukemia factor [Source:MGI Symbol;Acc:MGI:96108]	90336536	90390895	6
ENSMUSG00000075590	0.345686	0.258935	0.88146	0.000206627	Nrbp2	nuclear receptor binding protein 2 [Source:MGI Symbol;Acc:MGI:2385017]	76085518	76091627	10
ENSMUSG00000021477	0.209588	0.374171	0.660149	0.00020744	Ctsl	cathepsin L [Source:MGI Symbol;Acc:MGI:88564]	64359337	64370890	7
ENSMUSG00000096956	0.191213	0.483156	0.739685	0.000210374	Snhg18	small nucleolar RNA host gene 18 [Source:MGI Symbol;Acc:MGI:1914085]	32240565	32244662	1
ENSMUSG00000026630	0.160652	0.731909	-1.11283	0.000210374	Batf3	basic leucine zipper transcription factor, ATF-like 3 [Source:MGI Symbol;Acc:MGI:1925491]	191097847	191108945	5
ENSMUSG00000097462	0.33586	0.513146	1.4555	0.000210374	9530026P05Rik	RIKEN cDNA 9530026P05 gene [Source:MGI Symbol;Acc:MGI:1924659]	92940329	93272979	6
ENSMUSG00000042812	0.108401	0.779925	0.910007	0.000214862	Foxf1	forkhead box F1 [Source:MGI Symbol;Acc:MGI:1347470]	121084386	121088144	1
ENSMUSG00000036908	0.00636754	0.984432	-0.638702	0.000216311	Unc93b1	unc-93 homolog B1, TLR signaling regulator [Source:MGI Symbol;Acc:MGI:1859307]	3935186	3949340	7
ENSMUSG00000096054	0.235383	0.563474	1.0723	0.000218155	Syne1	spectrin repeat containing, nuclear envelope 1 [Source:MGI Symbol;Acc:MGI:1927152]	5020917	5551482	9
ENSMUSG00000030257	0.218942	0.547571	0.980029	0.000218765	Srgap3	SLIT-ROBO Rho GTPase activating protein 3 [Source:MGI Symbol;Acc:MGI:2152938]	112717971	112947266	5
ENSMUSG00000030020	0.260762	0.507488	1.06958	0.000222299	Prickle2	prickle planar cell polarity protein 2 [Source:MGI Symbol;Acc:MGI:1925144]	92370908	92706155	4
ENSMUSG00000085517	0.783155	0.0950899	1.50074	0.000222299	Gm12963	predicted gene 12963 [Source:MGI Symbol;Acc:MGI:3651569]	130024256	130047774	3
ENSMUSG00000026463	0.295708	0.489786	1.15125	0.000222299	Atp2b4	ATPase, Ca++ transporting, plasma membrane 4 [Source:MGI Symbol;Acc:MGI:88111]	133699457	133801041	8
ENSMUSG00000062929	0.268261	0.202682	0.6134	0.000222458	Cfl2	cofilin 2, muscle [Source:MGI Symbol;Acc:MGI:101763]	54858809	54862877	6
ENSMUSG00000056004	0.370942	0.366295	1.20796	0.00022575	9330182L06Rik	RIKEN cDNA 9330182L06 gene [Source:MGI Symbol;Acc:MGI:2443264]	9266118	9481825	8
ENSMUSG00000025716	0.0891824	0.878302	1.32836	0.000226114	Myo3a	myosin IIIA [Source:MGI Symbol;Acc:MGI:2183924]	22227503	22618252	6
ENSMUSG00000110151	0.507363	0.167864	1.10819	0.000227994	Gm38416	predicted gene, 38416 [Source:MGI Symbol;Acc:MGI:5621301]	117681622	117693198	2
ENSMUSG00000021216	0.172755	0.681656	1.05386	0.000228094	Tubal3	tubulin, alpha-like 3 [Source:MGI Symbol;Acc:MGI:3588215]	3918274	3935277	2
ENSMUSG00000026490	-0.0899188	0.785863	0.771162	0.000228842	Cdc42bpa	CDC42 binding protein kinase alpha [Source:MGI Symbol;Acc:MGI:2441841]	179960472	180165603	18
ENSMUSG00000041773	-0.356155	0.0140076	-0.45138	0.000230197	Enc1	ectodermal-neural cortex 1 [Source:MGI Symbol;Acc:MGI:109610]	97241105	97253034	1
ENSMUSG00000109644	0.404916	0.510584	1.65461	0.000231275	0610005C13Rik	RIKEN cDNA 0610005C13 gene [Source:MGI Symbol;Acc:MGI:1918911]	45567794	45575327	11
ENSMUSG00000026426	-0.249076	0.0194523	-0.329655	0.000231275	Arl8a	ADP-ribosylation factor-like 8A [Source:MGI Symbol;Acc:MGI:1915974]	135146824	135156269	4
ENSMUSG00000045954	0.407121	0.262932	1.03672	0.000233349	Cavin2	caveolae associated 2 [Source:MGI Symbol;Acc:MGI:99513]	51289126	51302960	1
ENSMUSG00000110195	-1.53331	0.190447	3.45054	0.000233349	Pde2a	phosphodiesterase 2A, cGMP-stimulated [Source:MGI Symbol;Acc:MGI:2446107]	101421691	101512827	12
ENSMUSG00000036062	0.566986	0.0263273	0.813177	0.000233349	Phf24	PHD finger protein 24 [Source:MGI Symbol;Acc:MGI:2140712]	42916660	42944752	9
ENSMUSG00000051727	0.117371	0.79361	1.04583	0.000233937	Kctd14	potassium channel tetramerisation domain containing 14 [Source:MGI Symbol;Acc:MGI:1289222]	97451323	97459557	6
ENSMUSG00000045930	0.137535	0.827419	1.43761	0.00023417	Clec14a	C-type lectin domain family 14, member a [Source:MGI Symbol;Acc:MGI:1914114]	58264720	58269290	1
ENSMUSG00000055737	0.228849	0.615047	1.16791	0.000235993	Ghr	growth hormone receptor [Source:MGI Symbol;Acc:MGI:95708]	3317760	3583492	10
ENSMUSG00000028093	-0.0225552	0.91197	0.436347	0.000241366	Acp6	acid phosphatase 6, lysophosphatidic [Source:MGI Symbol;Acc:MGI:1931010]	97158777	97177299	9
ENSMUSG00000025077	0.142392	0.504868	0.57797	0.000241366	Dclre1a	DNA cross-link repair 1A [Source:MGI Symbol;Acc:MGI:1930042]	56529167	56548222	6
ENSMUSG00000021567	0.347253	0.409053	1.16766	0.000241409	Nkd2	naked cuticle 2 [Source:MGI Symbol;Acc:MGI:1919543]	73818534	73847631	5
ENSMUSG00000030259	0.0340422	0.938524	0.918877	0.000241665	Rassf8	Ras association (RalGDS/AF-6) domain family (N-terminal) member 8 [Source:MGI Symbol;Acc:MGI:1918573]	145746748	145821079	4
ENSMUSG00000071253	0.0553028	0.776334	0.457041	0.000241921	Slc25a16	solute carrier family 25 (mitochondrial carrier, Graves disease autoantigen), member 16 [Source:MGI Symbol;Acc:MGI:1920382]	62920633	62946498	4
ENSMUSG00000020439	0.28404	0.492294	1.10581	0.000241921	Smtn	smoothelin [Source:MGI Symbol;Acc:MGI:1354727]	3517523	3540612	10
ENSMUSG00000029664	0.528994	0.250396	1.34764	0.000242144	Tfpi2	tissue factor pathway inhibitor 2 [Source:MGI Symbol;Acc:MGI:108543]	3962595	3988919	3
ENSMUSG00000055408	-0.0274847	0.936158	0.713322	0.000244617	Hottip	Hoxa distal transcript antisense RNA [Source:MGI Symbol;Acc:MGI:3642509]	52262775	52267603	2
ENSMUSG00000036095	0.461238	0.555334	2.30381	0.000245762	Dgkb	diacylglycerol kinase, beta [Source:MGI Symbol;Acc:MGI:2442474]	37817726	38634239	8
ENSMUSG00000036411	0.890856	0.100297	1.66919	0.00024909	9530077C05Rik	RIKEN cDNA 9530077C05 gene [Source:MGI Symbol;Acc:MGI:1915533]	22411513	22444681	4
ENSMUSG00000034771	0.475165	0.26808	1.23204	0.000249287	Tle2	transducin-like enhancer of split 2 [Source:MGI Symbol;Acc:MGI:104635]	81574561	81590845	16
ENSMUSG00000032122	-0.472664	0.61611	2.40139	0.000249289	Slc37a2	solute carrier family 37 (glycerol-3-phosphate transporter), member 2 [Source:MGI Symbol;Acc:MGI:1929693]	37227585	37255738	3
ENSMUSG00000053898	0.301318	0.15044	0.614155	0.000253669	Ech1	enoyl coenzyme A hydratase 1, peroxisomal [Source:MGI Symbol;Acc:MGI:1858208]	28825217	28832247	7
ENSMUSG00000035431	-0.380516	0.660174	2.28353	0.000253669	Sstr1	somatostatin receptor 1 [Source:MGI Symbol;Acc:MGI:98327]	58211772	58214444	2
ENSMUSG00000061603	0.363744	0.460406	1.34095	0.000253669	Akap6	A kinase (PRKA) anchor protein 6 [Source:MGI Symbol;Acc:MGI:3050566]	52699383	53155599	2
ENSMUSG00000038065	0.36671	0.411851	1.22755	0.000253975	Mturn	maturin, neural progenitor differentiation regulator homolog (Xenopus) [Source:MGI Symbol;Acc:MGI:1915485]	54681624	54703851	3
ENSMUSG00000046447	0.169396	0.536566	0.723619	0.000255111	Camk2n1	calcium/calmodulin-dependent protein kinase II inhibitor 1 [Source:MGI Symbol;Acc:MGI:1913509]	138454314	138460123	1
ENSMUSG00000008226	0.102326	0.720965	0.697156	0.000256403	Scrn3	secernin 3 [Source:MGI Symbol;Acc:MGI:1921866]	73312601	73337818	6
ENSMUSG00000004356	-0.0387031	0.868257	0.515303	0.00025694	Utp20	UTP20 small subunit processome component [Source:MGI Symbol;Acc:MGI:1917933]	88746607	88826804	7
ENSMUSG00000026483	-0.0358355	0.938403	0.948523	0.00025694	Fam129a	family with sequence similarity 129, member A [Source:MGI Symbol;Acc:MGI:2137237]	151571186	151721939	5
ENSMUSG00000087528	0.803213	0.197098	1.79888	0.00025694	9830144P21Rik	RIKEN cDNA 9830144P21 gene [Source:MGI Symbol;Acc:MGI:3041171]	129205958	129230579	2
ENSMUSG00000064307	0.0728397	0.886461	1.13132	0.000260239	Lrrc51	leucine rich repeat containing 51 [Source:MGI Symbol;Acc:MGI:1916608]	101912984	101933895	10
ENSMUSG00000026986	0.781187	0.0887081	1.3935	0.000260239	Hnmt	histamine N-methyltransferase [Source:MGI Symbol;Acc:MGI:2153181]	24002910	24049394	3
ENSMUSG00000037902	0.167201	0.54907	-0.729848	0.000260239	Sirpa	signal-regulatory protein alpha [Source:MGI Symbol;Acc:MGI:108563]	129592835	129632228	14
ENSMUSG00000050158	0.220559	0.833888	2.46875	0.000262511	Olfr165	olfactory receptor 165 [Source:MGI Symbol;Acc:MGI:3029999]	19406244	19423134	3
ENSMUSG00000021619	0.298899	0.290571	0.810153	0.000262511	Atg10	autophagy related 10 [Source:MGI Symbol;Acc:MGI:1914045]	90935356	91223968	3
ENSMUSG00000041827	-0.37681	0.21248	-0.864652	0.000263167	Oasl1	2'-5' oligoadenylate synthetase-like 1 [Source:MGI Symbol;Acc:MGI:2180849]	114923240	114937915	6
ENSMUSG00000036564	0.283807	0.424546	0.988288	0.000267742	Ndrg4	N-myc downstream regulated gene 4 [Source:MGI Symbol;Acc:MGI:2384590]	95676980	95715119	11
ENSMUSG00000033902	0.212566	0.234551	0.51696	0.00026962	Mapkbp1	mitogen-activated protein kinase binding protein 1 [Source:MGI Symbol;Acc:MGI:1347004]	119972699	120027408	5
ENSMUSG00000027984	-0.0410232	0.870511	0.552952	0.000270376	Hadh	hydroxyacyl-Coenzyme A dehydrogenase [Source:MGI Symbol;Acc:MGI:96009]	131233419	131272101	2
ENSMUSG00000027162	0.159589	0.464476	0.585592	0.000271879	Lin7c	lin-7 homolog C (C. elegans) [Source:MGI Symbol;Acc:MGI:1330839]	109890853	109901003	2
ENSMUSG00000063063	0.166909	0.835839	1.98964	0.000271879	Ctnna2	catenin (cadherin associated protein), alpha 2 [Source:MGI Symbol;Acc:MGI:88275]	76881637	77979699	8
ENSMUSG00000040543	0.25003	0.532367	1.05674	0.000271879	Pitpnm3	PITPNM family member 3 [Source:MGI Symbol;Acc:MGI:2685726]	72047528	72135778	5
ENSMUSG00000001901	-0.265559	0.744441	2.04567	0.000271879	Kcnh6	potassium voltage-gated channel, subfamily H (eag-related), member 6 [Source:MGI Symbol;Acc:MGI:2684139]	106008124	106034549	4
ENSMUSG00000022220	0.00575312	0.98546	-0.600009	0.000271879	Adcy4	adenylate cyclase 4 [Source:MGI Symbol;Acc:MGI:99674]	55769057	55784095	6
ENSMUSG00000091345	0.267417	0.577657	1.25868	0.000271879	Col6a5	collagen, type VI, alpha 5 [Source:MGI Symbol;Acc:MGI:3648134]	105856078	105960643	3
ENSMUSG00000024501	0.00689136	0.986031	0.75438	0.000272577	Dpysl3	dihydropyrimidinase-like 3 [Source:MGI Symbol;Acc:MGI:1349762]	43320984	43438286	6
ENSMUSG00000027876	-0.0839726	0.934936	2.10937	0.000276875	Reg4	regenerating islet-derived family, member 4 [Source:MGI Symbol;Acc:MGI:1914959]	98222156	98236748	1
ENSMUSG00000020990	0.984616	0.0507776	1.5484	0.000277776	Cdkl1	cyclin-dependent kinase-like 1 (CDC2-related kinase) [Source:MGI Symbol;Acc:MGI:1918341]	69746848	69791267	2
ENSMUSG00000035200	0.495011	0.24339	1.27123	0.000278317	Chrnb4	cholinergic receptor, nicotinic, beta polypeptide 4 [Source:MGI Symbol;Acc:MGI:87892]	55028154	55048779	1
ENSMUSG00000028207	-0.131942	0.580319	0.615721	0.000279058	Asph	aspartate-beta-hydroxylase [Source:MGI Symbol;Acc:MGI:1914186]	9448069	9669344	20
ENSMUSG00000032727	0.38802	0.146014	0.779021	0.000280936	Mier3	MIER family member 3 [Source:MGI Symbol;Acc:MGI:2442317]	111680979	111718596	11
ENSMUSG00000024044	-0.0942412	0.80406	0.864455	0.000284818	Epb41l3	erythrocyte membrane protein band 4.1 like 3 [Source:MGI Symbol;Acc:MGI:103008]	69075683	69289989	18
ENSMUSG00000028414	-0.0255477	0.911241	0.486249	0.000284818	Fktn	fukutin [Source:MGI Symbol;Acc:MGI:2179507]	53713998	53777890	5
ENSMUSG00000031714	0.00368662	0.994536	0.941383	0.000284818	Gab1	growth factor receptor bound protein 2-associated protein 1 [Source:MGI Symbol;Acc:MGI:108088]	80764438	80880519	3
ENSMUSG00000021238	0.0102389	0.984283	0.981008	0.000284818	Aldh6a1	aldehyde dehydrogenase family 6, subfamily A1 [Source:MGI Symbol;Acc:MGI:1915077]	84430717	84451004	5
ENSMUSG00000027861	0.796974	0.142189	1.60703	0.000284818	Casq2	calsequestrin 2 [Source:MGI Symbol;Acc:MGI:1309469]	102086415	102146514	5
ENSMUSG00000003410	0.00299835	0.997314	1.68417	0.000284818	Elavl3	ELAV like RNA binding protein 3 [Source:MGI Symbol;Acc:MGI:109157]	22015005	22052023	3
ENSMUSG00000037335	0.279999	0.502246	1.12562	0.000284818	Hand1	heart and neural crest derivatives expressed 1 [Source:MGI Symbol;Acc:MGI:103577]	57828705	57832818	3
ENSMUSG00000031340	0.284781	0.688203	1.83503	0.000284818	Gabre	gamma-aminobutyric acid (GABA) A receptor, subunit epsilon [Source:MGI Symbol;Acc:MGI:1330235]	72255999	72274803	3
ENSMUSG00000019124	0.277146	0.548934	1.23046	0.000284818	Scrn1	secernin 1 [Source:MGI Symbol;Acc:MGI:1917188]	54501173	54566489	6
ENSMUSG00000033502	0.110882	0.708723	0.720541	0.000284818	Cdc14a	CDC14 cell division cycle 14A [Source:MGI Symbol;Acc:MGI:2442676]	116272553	116424032	7
ENSMUSG00000030666	0.489101	0.289002	1.34732	0.000284894	Calcb	calcitonin-related polypeptide, beta [Source:MGI Symbol;Acc:MGI:2151254]	114718643	114723365	3
ENSMUSG00000040283	0.499903	0.369884	1.58131	0.00028588	Btnl9	butyrophilin-like 9 [Source:MGI Symbol;Acc:MGI:2442439]	49165585	49187159	5
ENSMUSG00000023094	-0.0182659	0.981103	1.47463	0.000285912	Msrb2	methionine sulfoxide reductase B2 [Source:MGI Symbol;Acc:MGI:1923717]	19371440	19394976	4
ENSMUSG00000020183	-0.741306	0.363854	2.24009	0.000286483	Cpm	carboxypeptidase M [Source:MGI Symbol;Acc:MGI:1917824]	117629500	117687352	4
ENSMUSG00000018774	-0.0498829	0.863288	-0.633892	0.000290765	Cd68	CD68 antigen [Source:MGI Symbol;Acc:MGI:88342]	69664213	69666153	3
ENSMUSG00000038331	-0.138939	0.573455	0.636152	0.000291437	Satb2	special AT-rich sequence binding protein 2 [Source:MGI Symbol;Acc:MGI:2679336]	56793981	56978650	5
ENSMUSG00000000197	0.747216	0.197749	1.91594	0.000291437	Nalcn	sodium leak channel, non-selective [Source:MGI Symbol;Acc:MGI:2444306]	123276634	123627144	7
ENSMUSG00000055137	0.28585	0.494372	1.13366	0.000291567	Sugct	succinyl-CoA glutarate-CoA transferase [Source:MGI Symbol;Acc:MGI:1923221]	16857472	17695553	5
ENSMUSG00000007891	0.036075	0.873941	-0.494519	0.000292978	Ctsd	cathepsin D [Source:MGI Symbol;Acc:MGI:88562]	142375911	142388038	3
ENSMUSG00000040121	0.383061	0.407431	1.25329	0.000293058	Rep15	RAB15 effector protein [Source:MGI Symbol;Acc:MGI:1913782]	147032584	147034245	1
ENSMUSG00000020081	0.108252	0.839274	1.20054	0.000293058	Tacr2	tachykinin receptor 2 [Source:MGI Symbol;Acc:MGI:98477]	62252438	62265990	1
ENSMUSG00000071714	0.0274682	0.954938	-0.979903	0.000293058	Csf2rb2	colony stimulating factor 2 receptor, beta 2, low-affinity (granulocyte-macrophage) [Source:MGI Symbol;Acc:MGI:1339760]	78282507	78305721	4
ENSMUSG00000067377	0.531194	0.0990224	0.95808	0.000297594	Tspan6	tetraspanin 6 [Source:MGI Symbol;Acc:MGI:1926264]	133891068	133898429	4
ENSMUSG00000022658	0.312203	0.454519	1.199	0.000297921	Tagln3	transgelin 3 [Source:MGI Symbol;Acc:MGI:1926784]	45711230	45724608	1
ENSMUSG00000028255	0.0934852	0.858492	1.1495	0.000300683	Clca1	chloride channel accessory 1 [Source:MGI Symbol;Acc:MGI:1346342]	145003817	145032776	3
ENSMUSG00000036636	-0.0491845	0.778898	-0.399438	0.000300683	Clcn7	chloride channel, voltage-sensitive 7 [Source:MGI Symbol;Acc:MGI:1347048]	25133391	25162104	7
ENSMUSG00000022584	-0.148826	0.748565	-1.08112	0.000300683	Ly6c2	lymphocyte antigen 6 complex, locus C2 [Source:MGI Symbol;Acc:MGI:3712069]	75108158	75111970	4
ENSMUSG00000028179	0.236101	0.546118	1.01635	0.000303373	Cth	cystathionase (cystathionine gamma-lyase) [Source:MGI Symbol;Acc:MGI:1339968]	157894248	157925077	4
ENSMUSG00000020524	0.0786243	0.94988	3.25007	0.000303373	Gria1	glutamate receptor, ionotropic, AMPA1 (alpha 1) [Source:MGI Symbol;Acc:MGI:95808]	57011387	57330244	5
ENSMUSG00000022148	0.0612004	0.824596	-0.614377	0.000303373	Fyb	FYN binding protein [Source:MGI Symbol;Acc:MGI:1346327]	6522853	6663313	10
ENSMUSG00000114349	0.181767	0.430521	0.631494	0.000303537	Gm7591	predicted gene 7591 [Source:MGI Symbol;Acc:MGI:3644074]	27210397	27211249	1
ENSMUSG00000045316	-0.115109	0.792066	0.995351	0.000303537	Fahd1	fumarylacetoacetate hydrolase domain containing 1 [Source:MGI Symbol;Acc:MGI:1915886]	24848892	24850364	1
ENSMUSG00000038756	-0.0200514	0.980826	1.54794	0.000304637	Ttll6	tubulin tyrosine ligase-like family, member 6 [Source:MGI Symbol;Acc:MGI:2683461]	96133786	96165451	2
ENSMUSG00000040260	0.0878631	0.879816	1.26324	0.000305443	Daam2	dishevelled associated activator of morphogenesis 2 [Source:MGI Symbol;Acc:MGI:1923691]	49456022	49564343	4
ENSMUSG00000038365	0.0895815	0.782638	0.741135	0.000306408	Fbxo25	F-box protein 25 [Source:MGI Symbol;Acc:MGI:1914072]	13907803	13940522	5
ENSMUSG00000021939	-0.231726	0.0879247	-0.399473	0.000309288	Ctsb	cathepsin B [Source:MGI Symbol;Acc:MGI:88561]	63122462	63145923	3
ENSMUSG00000093789	-0.57565	0.80643	5.88422	0.00031038	Methig1	methyltransferase hypoxia inducible domain containing 1 [Source:MGI Symbol;Acc:MGI:3845761]	100353149	100384436	2
ENSMUSG00000026657	0.0250869	0.944852	0.73671	0.000311174	Frmd4a	FERM domain containing 4A [Source:MGI Symbol;Acc:MGI:1919850]	4017717	4614043	19
ENSMUSG00000018378	0.176711	0.63075	0.920409	0.000317184	Cuedc1	CUE domain containing 1 [Source:MGI Symbol;Acc:MGI:2144281]	88098058	88194140	7
ENSMUSG00000019989	-0.00140985	0.998781	1.84524	0.000318059	Enpp3	ectonucleotide pyrophosphatase/phosphodiesterase 3 [Source:MGI Symbol;Acc:MGI:2143702]	24772406	24842823	9
ENSMUSG00000014602	-0.134396	0.789391	1.16551	0.000318059	Kif1a	kinesin family member 1A [Source:MGI Symbol;Acc:MGI:108391]	93015464	93101951	11
ENSMUSG00000073664	0.44136	0.0600457	0.694934	0.000320893	Nbeal1	neurobeachin like 1 [Source:MGI Symbol;Acc:MGI:2444343]	60180599	60338328	10
ENSMUSG00000033022	0.240675	0.51259	0.961424	0.000320898	Cdo1	cysteine dioxygenase 1, cytosolic [Source:MGI Symbol;Acc:MGI:105925]	46713193	46728395	5
ENSMUSG00000032911	0.407647	0.232408	0.967794	0.000320898	Cspg4	chondroitin sulfate proteoglycan 4 [Source:MGI Symbol;Acc:MGI:2153093]	56865033	56899870	4
ENSMUSG00000057315	0.0719808	0.898585	1.20592	0.000323398	Arhgap24	Rho GTPase activating protein 24 [Source:MGI Symbol;Acc:MGI:1922647]	102481391	102897937	8
ENSMUSG00000016494	0.417738	0.270629	1.05563	0.000323398	Cd34	CD34 antigen [Source:MGI Symbol;Acc:MGI:88329]	194938819	194961279	5
ENSMUSG00000027375	0.0253785	0.969636	1.29802	0.000323398	Mal	myelin and lymphocyte protein, T cell differentiation protein [Source:MGI Symbol;Acc:MGI:892970]	127633226	127656695	2
ENSMUSG00000037712	0.208286	0.567622	0.934411	0.000323398	Fermt2	fermitin family member 2 [Source:MGI Symbol;Acc:MGI:2385001]	45458795	45530118	6
ENSMUSG00000057914	0.279306	0.601838	1.37128	0.000323398	Cacnb2	calcium channel, voltage-dependent, beta 2 subunit [Source:MGI Symbol;Acc:MGI:894644]	14603088	14987908	16
ENSMUSG00000025738	0.390578	0.464767	1.46843	0.000323973	Fbxl16	F-box and leucine-rich repeat protein 16 [Source:MGI Symbol;Acc:MGI:2448488]	25809085	25821255	3
ENSMUSG00000034557	-0.142485	0.680553	0.846949	0.000323973	Zfyve9	zinc finger, FYVE domain containing 9 [Source:MGI Symbol;Acc:MGI:2652838]	108637466	108780798	3
ENSMUSG00000026308	0.269018	0.720277	1.89548	0.000323973	Klhl30	kelch-like 30 [Source:MGI Symbol;Acc:MGI:1918038]	91351016	91362416	1
ENSMUSG00000009281	0.63713	0.0436015	0.931797	0.000330229	Rarres2	retinoic acid receptor responder (tazarotene induced) 2 [Source:MGI Symbol;Acc:MGI:1918910]	48569696	48572789	5
ENSMUSG00000027282	0.199173	0.237853	0.473867	0.000330229	Mtch2	mitochondrial carrier 2 [Source:MGI Symbol;Acc:MGI:1929260]	90847155	90866810	11
ENSMUSG00000048572	0.389586	0.320464	1.07562	0.000332141	Tmem252	transmembrane protein 252 [Source:MGI Symbol;Acc:MGI:3583948]	24674008	24682233	1
ENSMUSG00000047139	0.223001	0.428751	0.752336	0.000333119	Cd24a	CD24a antigen [Source:MGI Symbol;Acc:MGI:88323]	43578284	43584265	3
ENSMUSG00000049791	0.179654	0.672839	1.04212	0.000333454	Fzd4	frizzled class receptor 4 [Source:MGI Symbol;Acc:MGI:108520]	89404355	89413134	1
ENSMUSG00000045975	0.0736518	0.883695	1.07651	0.000334546	C2cd2	C2 calcium-dependent domain containing 2 [Source:MGI Symbol;Acc:MGI:1891883]	97855209	97962598	10
ENSMUSG00000029811	-0.804704	0.191187	1.74559	0.000336224	Aoc1	amine oxidase, copper-containing 1 [Source:MGI Symbol;Acc:MGI:1923757]	48872896	48909188	5
ENSMUSG00000102752	0.094523	0.81306	0.907228	0.000336391	Gm7694	predicted gene 7694 [Source:MGI Symbol;Acc:MGI:3649135]	170298199	170306332	1
ENSMUSG00000027938	-0.215669	0.63435	1.13382	0.000336391	Creb3l4	cAMP responsive element binding protein 3-like 4 [Source:MGI Symbol;Acc:MGI:1916603]	90237500	90243512	2
ENSMUSG00000053870	0.293619	0.201681	0.651582	0.000336391	Fpgt	fucose-1-phosphate guanylyltransferase [Source:MGI Symbol;Acc:MGI:1922790]	155084918	155093403	6
ENSMUSG00000027540	-0.266136	0.237239	-0.629971	0.000336391	Ptpn1	protein tyrosine phosphatase, non-receptor type 1 [Source:MGI Symbol;Acc:MGI:97805]	167932057	167979385	7
ENSMUSG00000032715	-0.516891	0.354789	-1.50372	0.000336391	Trib3	tribbles pseudokinase 3 [Source:MGI Symbol;Acc:MGI:1345675]	152337422	152344032	3
ENSMUSG00000024302	0.285805	0.426185	0.966335	0.000336391	Dtna	dystrobrevin alpha [Source:MGI Symbol;Acc:MGI:106039]	23415135	23659715	10
ENSMUSG00000086141	0.141894	0.835073	1.53279	0.000341457	9030622O22Rik	RIKEN cDNA 9030622O22 gene [Source:MGI Symbol;Acc:MGI:1918820]	147944740	148040203	3
ENSMUSG00000035686	1.08019	0.144537	2.13583	0.000341856	Thrsp	thyroid hormone responsive [Source:MGI Symbol;Acc:MGI:109126]	97412938	97417730	2
ENSMUSG00000027188	0.0107781	0.984317	1.03795	0.000342441	Pamr1	peptidase domain containing associated with muscle regeneration 1 [Source:MGI Symbol;Acc:MGI:2445082]	102550012	102643041	4
ENSMUSG00000015484	0.553766	0.316342	1.69454	0.00034357	Fam163a	family with sequence similarity 163, member A [Source:MGI Symbol;Acc:MGI:3618859]	156075966	156205026	1
ENSMUSG00000033981	0.50479	0.380992	1.72283	0.000344808	Gria2	glutamate receptor, ionotropic, AMPA2 (alpha 2) [Source:MGI Symbol;Acc:MGI:95809]	80681450	80802835	8
ENSMUSG00000034245	-0.225754	0.628579	1.16265	0.000345285	Hdac11	histone deacetylase 11 [Source:MGI Symbol;Acc:MGI:2385252]	91156665	91174692	7
ENSMUSG00000029838	0.545672	0.147451	1.08262	0.000345285	Ptn	pleiotrophin [Source:MGI Symbol;Acc:MGI:97804]	36714929	36810220	2
ENSMUSG00000036158	0.36799	0.396178	1.17785	0.000345285	Prickle1	prickle planar cell polarity protein 1 [Source:MGI Symbol;Acc:MGI:1916034]	93499114	93595891	2
ENSMUSG00000096852	0.0801177	0.939954	2.14129	0.000345285	Cyp2d12	cytochrome P450, family 2, subfamily d, polypeptide 12 [Source:MGI Symbol;Acc:MGI:88604]	82555072	82560403	7
ENSMUSG00000027243	-0.0268269	0.925662	0.596507	0.000345285	Harbi1	harbinger transposase derived 1 [Source:MGI Symbol;Acc:MGI:2443194]	91710852	91721545	5
ENSMUSG00000036912	-0.0605495	0.924969	1.42458	0.000345285	Piwil4	piwi-like RNA-mediated gene silencing 4 [Source:MGI Symbol;Acc:MGI:3041167]	14696230	14740733	4
ENSMUSG00000030399	0.290312	0.539182	1.2249	0.000345285	Ckm	creatine kinase, muscle [Source:MGI Symbol;Acc:MGI:88413]	19404776	19422841	3
ENSMUSG00000047976	-0.292088	0.757239	2.46327	0.000345285	Kcna1	potassium voltage-gated channel, shaker-related subfamily, member 1 [Source:MGI Symbol;Acc:MGI:96654]	126640397	126646384	3
ENSMUSG00000022378	0.0798395	0.616115	-0.396093	0.000345285	Fam49b	family with sequence similarity 49, member B [Source:MGI Symbol;Acc:MGI:1923520]	63929097	64060478	8
ENSMUSG00000030865	0.122718	0.784514	1.01353	0.000345289	Chp2	calcineurin-like EF hand protein 2 [Source:MGI Symbol;Acc:MGI:1917511]	122219496	122222824	2
ENSMUSG00000022075	-0.147077	0.374588	-0.448223	0.000345289	Rhobtb2	Rho-related BTB domain containing 2 [Source:MGI Symbol;Acc:MGI:2180557]	69784990	69805636	4
ENSMUSG00000005045	0.143181	0.793704	1.27189	0.000345289	Chd5	chromodomain helicase DNA binding protein 5 [Source:MGI Symbol;Acc:MGI:3036258]	152338651	152390194	5
ENSMUSG00000042476	0.000423522	0.999565	1.63212	0.000346373	Abcb4	ATP-binding cassette, sub-family B (MDR/TAP), member 4 [Source:MGI Symbol;Acc:MGI:97569]	8893717	8959231	5
ENSMUSG00000041261	0.748376	0.0206187	0.969658	0.00034963	Car8	carbonic anhydrase 8 [Source:MGI Symbol;Acc:MGI:88253]	8143362	8239041	1
ENSMUSG00000071424	0.421846	0.370302	1.33406	0.00035016	Grid2	glutamate receptor, ionotropic, delta 2 [Source:MGI Symbol;Acc:MGI:95813]	63255876	64704323	7
ENSMUSG00000072620	0.015095	0.980965	-1.15919	0.00035016	Slfn2	schlafen 2 [Source:MGI Symbol;Acc:MGI:1313258]	83065112	83070678	1
ENSMUSG00000089942	0.222857	0.501418	-0.842804	0.00035016	Pira2	paired-Ig-like receptor A2 [Source:MGI Symbol;Acc:MGI:1195970]	3836812	3845051	2
ENSMUSG00000025375	0.482872	0.306651	1.30889	0.000356133	Aatk	apoptosis-associated tyrosine kinase [Source:MGI Symbol;Acc:MGI:1197518]	120007313	120047167	9
ENSMUSG00000050315	0.27202	0.510201	1.06893	0.000356558	Synpo2	synaptopodin 2 [Source:MGI Symbol;Acc:MGI:2153070]	123076519	123236149	7
ENSMUSG00000073413	0.0780948	0.911241	1.47404	0.000357492	Ly6g6d	lymphocyte antigen 6 complex, locus G6D [Source:MGI Symbol;Acc:MGI:2148931]	35071443	35078065	5
ENSMUSG00000018566	0.325868	0.388293	1.02075	0.000357492	Slc2a4	solute carrier family 2 (facilitated glucose transporter), member 4 [Source:MGI Symbol;Acc:MGI:95758]	69942539	69948188	8
ENSMUSG00000003865	-0.49587	0.0185009	-0.629989	0.000357492	Gys1	glycogen synthase 1, muscle [Source:MGI Symbol;Acc:MGI:101805]	45434844	45456619	6
ENSMUSG00000038143	0.0143166	0.982889	1.22298	0.000357492	Stox2	storkhead box 2 [Source:MGI Symbol;Acc:MGI:1918319]	47180048	47446362	9
ENSMUSG00000038077	0.294203	0.683524	1.85966	0.000359371	Kcna6	potassium voltage-gated channel, shaker-related, subfamily, member 6 [Source:MGI Symbol;Acc:MGI:96663]	126708329	126740674	4
ENSMUSG00000052504	0.0238735	0.976383	1.79536	0.00036371	Epha3	Eph receptor A3 [Source:MGI Symbol;Acc:MGI:99612]	63543534	63864175	6
ENSMUSG00000057181	0.148152	0.44373	0.520056	0.000365912	5730455P16Rik	RIKEN cDNA 5730455P16 gene [Source:MGI Symbol;Acc:MGI:1917841]	80360492	80378034	4
ENSMUSG00000025139	-0.173507	0.0863542	-0.294757	0.000366029	Tollip	toll interacting protein [Source:MGI Symbol;Acc:MGI:1891808]	141874813	141918507	5
ENSMUSG00000033460	0.311269	0.471579	1.14529	0.000366061	Armcx1	armadillo repeat containing, X-linked 1 [Source:MGI Symbol;Acc:MGI:1925498]	134717963	134721917	10
ENSMUSG00000049536	0.600107	0.248791	1.47443	0.000366061	Tceal1	transcription elongation factor A (SII)-like 1 [Source:MGI Symbol;Acc:MGI:2385317]	136707982	136711478	1
ENSMUSG00000051236	0.3122	0.308082	0.838082	0.000366752	Msrb3	methionine sulfoxide reductase B3 [Source:MGI Symbol;Acc:MGI:2443538]	120781096	120899101	3
ENSMUSG00000001508	0.706984	0.194764	1.58694	0.00036677	Sgca	sarcoglycan, alpha (dystrophin-associated glycoprotein) [Source:MGI Symbol;Acc:MGI:894698]	94962791	94976327	5
ENSMUSG00000046186	0.155852	0.743175	1.11092	0.00036677	Cd109	CD109 antigen [Source:MGI Symbol;Acc:MGI:2445221]	78615546	78716253	2
ENSMUSG00000055652	-0.244457	0.204061	-0.540217	0.00036677	Klhl25	kelch-like 25 [Source:MGI Symbol;Acc:MGI:2668031]	75848310	75874131	6
ENSMUSG00000037106	-0.0752633	0.9069	1.32632	0.000369113	Fer1l6	fer-1-like 6 (C. elegans) [Source:MGI Symbol;Acc:MGI:3645398]	58510048	58665092	3
ENSMUSG00000019975	0.379461	0.164823	0.780649	0.000369113	Ikbip	IKBKB interacting protein [Source:MGI Symbol;Acc:MGI:1914704]	91082940	91102607	6
ENSMUSG00000026058			2.55872	0.000369113	Khdrbs2	KH domain containing, RNA binding, signal transduction associated 2 [Source:MGI Symbol;Acc:MGI:2159649]	32172714	32658568	5
ENSMUSG00000023931	0.304565	0.391434	1.03126	0.000369113	Efhb	EF hand domain family, member B [Source:MGI Symbol;Acc:MGI:3045296]	53398889	53463321	2
ENSMUSG00000009614	0.280387	0.553857	1.22991	0.0003696	Sardh	sarcosine dehydrogenase [Source:MGI Symbol;Acc:MGI:2183102]	27188393	27248337	10
ENSMUSG00000092250	0.3269	0.447167	1.23862	0.000376504	Gm20467	predicted gene 20467 [Source:MGI Symbol;Acc:MGI:5141932]	43609077	43610625	1
ENSMUSG00000021690	0.181398	0.515992	0.721482	0.000376504	Jmy	junction-mediating and regulatory protein [Source:MGI Symbol;Acc:MGI:1913096]	93430101	93499808	2
ENSMUSG00000091277	-0.110032	0.69432	0.702452	0.000379158	Gm1818	predicted gene 1818 [Source:MGI Symbol;Acc:MGI:3037676]	48555308	48559885	1
ENSMUSG00000054477	0.56255	0.57076	2.72901	0.000379273	Kcnn2	potassium intermediate/small conductance calcium-activated channel, subfamily N, member 2 [Source:MGI Symbol;Acc:MGI:2153182]	45268860	45686024	10
ENSMUSG00000003279	0.117494	0.826813	1.35615	0.000382748	Dlgap1	DLG associated protein 1 [Source:MGI Symbol;Acc:MGI:1346065]	69969073	70821413	20
ENSMUSG00000033544	0.720994	0.0996646	1.28812	0.000382748	Angptl1	angiopoietin-like 1 [Source:MGI Symbol;Acc:MGI:1919963]	156838562	156861078	2
ENSMUSG00000110639	0.464771	0.2228	1.087	0.000384444	Gm6831	predicted gene 6831 [Source:MGI Symbol;Acc:MGI:3645552]	104755779	104764069	2
ENSMUSG00000027765	-0.0423485	0.888926	0.644048	0.000387256	P2ry1	purinergic receptor P2Y, G-protein coupled 1 [Source:MGI Symbol;Acc:MGI:105049]	61002795	61008982	3
ENSMUSG00000028277	-0.320288	0.00232103	-0.319758	0.00039085	Ube2j1	ubiquitin-conjugating enzyme E2J 1 [Source:MGI Symbol;Acc:MGI:1926245]	33031416	33052363	3
ENSMUSG00000021719	0.355009	0.51501	1.41169	0.00039389	Rgs7bp	regulator of G-protein signalling 7 binding protein [Source:MGI Symbol;Acc:MGI:106334]	104945904	105054930	1
ENSMUSG00000008575	0.195012	0.242501	0.462525	0.000397609	Nfib	nuclear factor I/B [Source:MGI Symbol;Acc:MGI:103188]	82290173	82705750	12
ENSMUSG00000032006	0.505431	0.265955	1.26531	0.000398294	Pdgfd	platelet-derived growth factor, D polypeptide [Source:MGI Symbol;Acc:MGI:1919035]	6168584	6378850	3
ENSMUSG00000046699			2.43663	0.000399086	Slitrk4	SLIT and NTRK-like family, member 4 [Source:MGI Symbol;Acc:MGI:2442509]	64264885	64276996	3
ENSMUSG00000046709	0.260613	0.614299	1.37874	0.000399086	Mapk10	mitogen-activated protein kinase 10 [Source:MGI Symbol;Acc:MGI:1346863]	102907948	103211334	12
ENSMUSG00000026489	-0.299594	0.612746	1.46569	0.000399086	Coq8a	coenzyme Q8A [Source:MGI Symbol;Acc:MGI:1914676]	180165238	180199602	17
ENSMUSG00000028709	-0.0676368	0.749525	-0.483499	0.000399086	Mob3c	MOB kinase activator 3C [Source:MGI Symbol;Acc:MGI:2140623]	115828092	115836185	3
ENSMUSG00000027318	0.500599	0.293364	1.29805	0.000401347	Adam33	a disintegrin and metallopeptidase domain 33 [Source:MGI Symbol;Acc:MGI:1341813]	131050591	131063814	13
ENSMUSG00000025647	-0.277752	0.0424749	-0.398263	0.000401347	Shisa5	shisa family member 5 [Source:MGI Symbol;Acc:MGI:1915044]	109038565	109057777	19
ENSMUSG00000024772	-0.105776	0.601096	-0.500605	0.000402219	Ehd1	EH-domain containing 1 [Source:MGI Symbol;Acc:MGI:1341878]	6276725	6300096	4
ENSMUSG00000038319	0.382378	0.422105	1.26423	0.000402799	Kcnh2	potassium voltage-gated channel, subfamily H (eag-related), member 2 [Source:MGI Symbol;Acc:MGI:1341722]	24319589	24351604	5
ENSMUSG00000021417	0.0769029	0.64776	0.411566	0.000402799	Eci2	enoyl-Coenzyme A delta isomerase 2 [Source:MGI Symbol;Acc:MGI:1346064]	34977748	35027096	14
ENSMUSG00000033389	0.541433	0.152635	1.09654	0.000405187	Arhgap44	Rho GTPase activating protein 44 [Source:MGI Symbol;Acc:MGI:2144423]	65002039	65162961	4
ENSMUSG00000005373	0.337923	0.151396	0.674766	0.000406324	Mlxipl	MLX interacting protein-like [Source:MGI Symbol;Acc:MGI:1927999]	135089890	135138382	10
ENSMUSG00000025609	0.194626	0.175201	0.40448	0.000408047	Mkln1	muskelin 1, intracellular mediator containing kelch motifs [Source:MGI Symbol;Acc:MGI:1351638]	31398735	31516811	13
ENSMUSG00000055748	0.159103	0.714713	1.01895	0.000408519	Gsdmc4	gasdermin C4 [Source:MGI Symbol;Acc:MGI:1921798]	63891264	63912297	2
ENSMUSG00000017688	-0.00234927	0.995767	0.73399	0.00041135	Hnf4g	hepatocyte nuclear factor 4, gamma [Source:MGI Symbol;Acc:MGI:1353604]	3508030	3658052	2
ENSMUSG00000039294	-0.0203303	0.923001	-0.424241	0.0004124	Cybc1	cytochrome b 245 chaperone 1 [Source:MGI Symbol;Acc:MGI:2384959]	121222588	121229322	8
ENSMUSG00000021750	0.134521	0.857986	1.704	0.000412955	Fam107a	family with sequence similarity 107, member A [Source:MGI Symbol;Acc:MGI:3041256]	8296274	8318023	4
ENSMUSG00000023036	-0.640782	0.352777	1.87715	0.000413891	Pcdhgc4	protocadherin gamma subfamily C, 4 [Source:MGI Symbol;Acc:MGI:1935203]	37815079	37841873	3
ENSMUSG00000037211	-0.185427	0.644321	0.992483	0.00041772	Spry1	sprouty RTK signaling antagonist 1 [Source:MGI Symbol;Acc:MGI:1345139]	37639947	37644598	3
ENSMUSG00000038024	-0.0882051	0.68997	0.528217	0.00041772	Dennd4c	DENN/MADD domain containing 4C [Source:MGI Symbol;Acc:MGI:1914769]	86748555	86850603	4
ENSMUSG00000062901	0.328844	0.377282	0.993876	0.00041772	Klhl24	kelch-like 24 [Source:MGI Symbol;Acc:MGI:1923035]	20097542	20129221	5
ENSMUSG00000057722	0.642699	0.132409	1.22102	0.000418578	Lepr	leptin receptor [Source:MGI Symbol;Acc:MGI:104993]	101717404	101815352	7
ENSMUSG00000005802	0.278892	0.212895	0.620415	0.000425509	Slc30a4	solute carrier family 30 (zinc transporter), member 4 [Source:MGI Symbol;Acc:MGI:1345282]	122681233	122702663	2
ENSMUSG00000079355	0.736059	0.0669606	1.16617	0.000425509	Ackr4	atypical chemokine receptor 4 [Source:MGI Symbol;Acc:MGI:2181676]	104084157	104126933	4
ENSMUSG00000026471	0.291571	0.451219	1.02471	0.000426925	Mr1	major histocompatibility complex, class I-related [Source:MGI Symbol;Acc:MGI:1195463]	155127277	155146814	5
ENSMUSG00000060586	-0.0505414	0.91018	-0.907502	0.000426925	H2-Eb1	histocompatibility 2, class II antigen E beta [Source:MGI Symbol;Acc:MGI:95901]	34305867	34316674	5
ENSMUSG00000081488	1.14818	0.220645	2.75345	0.000431272	Gm15368	predicted gene 15368 [Source:MGI Symbol;Acc:MGI:3707462]	88186662	88187519	1
ENSMUSG00000028773	0.347578	0.669156	2.17961	0.000432001	Fabp3	fatty acid binding protein 3, muscle and heart [Source:MGI Symbol;Acc:MGI:95476]	130308595	130315463	1
ENSMUSG00000025171	-0.217262	0.22238	-0.493241	0.000433136	Ubtd1	ubiquitin domain containing 1 [Source:MGI Symbol;Acc:MGI:2385092]	41981763	42034643	2
ENSMUSG00000039385	0.247499	0.694539	1.57684	0.000433653	Cdh6	cadherin 6 [Source:MGI Symbol;Acc:MGI:107435]	13028701	13173675	2
ENSMUSG00000019326	0.412224	0.285566	1.04978	0.000435481	Aoc3	amine oxidase, copper containing 3 [Source:MGI Symbol;Acc:MGI:1306797]	101330605	101341938	2
ENSMUSG00000038718	0.27064	0.375508	0.818023	0.000435481	Pbx3	pre B cell leukemia homeobox 3 [Source:MGI Symbol;Acc:MGI:97496]	34171457	34373142	10
ENSMUSG00000063564	0.374155	0.451985	1.30038	0.000437343	Col23a1	collagen, type XXIII, alpha 1 [Source:MGI Symbol;Acc:MGI:2653243]	51289920	51583918	2
ENSMUSG00000063142	0.243251	0.414042	0.787371	0.000437864	Kcnma1	potassium large conductance calcium-activated channel, subfamily M, alpha member 1 [Source:MGI Symbol;Acc:MGI:99923]	23289431	24014491	38
ENSMUSG00000058818	0.280068	0.369848	-0.8234	0.000439316	Pirb	paired Ig-like receptor B [Source:MGI Symbol;Acc:MGI:894311]	3711409	3720391	5
ENSMUSG00000033377	0.24546	0.577121	1.12916	0.000443353	Palmd	palmdelphin [Source:MGI Symbol;Acc:MGI:2148896]	116918258	116968987	4
ENSMUSG00000050069	0.491261	0.154436	0.972672	0.000444157	Grem2	gremlin 2, DAN family BMP antagonist [Source:MGI Symbol;Acc:MGI:1344367]	174833785	174921819	1
ENSMUSG00000037624	0.852732	0.154745	1.77086	0.000444157	Kcnk2	potassium channel, subfamily K, member 2 [Source:MGI Symbol;Acc:MGI:109366]	189207930	189402273	10
ENSMUSG00000049872	0.465487	0.178332	0.981364	0.000444157	Calhm5	calcium homeostasis modulator family member 5 [Source:MGI Symbol;Acc:MGI:2143897]	34087815	34096519	1
ENSMUSG00000034785	0.388238	0.424337	1.27309	0.000444157	Dio1	deiodinase, iodothyronine, type I [Source:MGI Symbol;Acc:MGI:94896]	107291465	107307169	8
ENSMUSG00000036594	-0.116513	0.808147	-1.0478	0.000445281	H2-Aa	histocompatibility 2, class II antigen A, alpha [Source:MGI Symbol;Acc:MGI:95895]	34282744	34287823	4
ENSMUSG00000061740	0.125693	0.844199	1.376	0.000452254	Cyp2d22	cytochrome P450, family 2, subfamily d, polypeptide 22 [Source:MGI Symbol;Acc:MGI:1929474]	82370527	82380260	6
ENSMUSG00000037259	-0.0156417	0.983898	1.52326	0.000452254	Dzank1	double zinc ribbon and ankyrin repeat domains 1 [Source:MGI Symbol;Acc:MGI:2139080]	144470557	144527414	4
ENSMUSG00000075273	0.0919831	0.804808	0.832117	0.000452254	Ttc30b	tetratricopeptide repeat domain 30B [Source:MGI Symbol;Acc:MGI:1919671]	75935849	75938585	1
ENSMUSG00000030862	-0.112406	0.837067	1.19264	0.000466447	Cpxm2	carboxypeptidase X 2 (M14 family) [Source:MGI Symbol;Acc:MGI:1926006]	132032687	132154739	5
ENSMUSG00000113800	0.230399	0.541162	0.985067	0.000467243	2210039B01Rik	RIKEN cDNA 2210039B01 gene [Source:MGI Symbol;Acc:MGI:1920894]	73548478	73551986	1
ENSMUSG00000021835	0.00774534	0.987297	0.917646	0.000471119	Bmp4	bone morphogenetic protein 4 [Source:MGI Symbol;Acc:MGI:88180]	46383520	46390669	4
ENSMUSG00000045573	0.71658	0.00012161	0.564572	0.000471119	Penk	preproenkephalin [Source:MGI Symbol;Acc:MGI:104629]	4133531	4138819	2
ENSMUSG00000047787	-0.0528592	0.940472	1.4776	0.000471674	Flrt1	fibronectin leucine rich transmembrane protein 1 [Source:MGI Symbol;Acc:MGI:3026647]	7092001	7105729	1
ENSMUSG00000063430	0.205731	0.645762	1.08272	0.000477245	Wscd2	WSC domain containing 2 [Source:MGI Symbol;Acc:MGI:2445030]	113490333	113589725	6
ENSMUSG00000070985	0.155596	0.599393	0.73303	0.000480125	Acnat1	acyl-coenzyme A amino acid N-acyltransferase 1 [Source:MGI Symbol;Acc:MGI:2140197]	49447105	49473912	4
ENSMUSG00000028698	0.0997328	0.783487	0.803187	0.000483598	Pik3r3	phosphoinositide-3-kinase regulatory subunit 3 [Source:MGI Symbol;Acc:MGI:109277]	116221618	116303056	3
ENSMUSG00000032977	-0.300658	0.0280631	-0.399565	0.000484009	Fam207a	family with sequence similarity 207, member A [Source:MGI Symbol;Acc:MGI:1916334]	77486661	77515785	3
ENSMUSG00000046402	0.386948	0.244158	-0.897883	0.000485637	Rbp1	retinol binding protein 1, cellular [Source:MGI Symbol;Acc:MGI:97876]	98422961	98446575	1
ENSMUSG00000068617	0.734956	0.384238	2.3999	0.000491282	Efcab1	EF-hand calcium binding domain 1 [Source:MGI Symbol;Acc:MGI:1914043]	14906606	14981371	4
ENSMUSG00000047592	-0.46101	0.385562	1.39749	0.000494903	Nxpe5	neurexophilin and PC-esterase domain family, member 5 [Source:MGI Symbol;Acc:MGI:3584036]	138225898	138253363	5
ENSMUSG00000034462	0.0529547	0.894776	0.824617	0.000496255	Pkd2	polycystic kidney disease 2 [Source:MGI Symbol;Acc:MGI:1099818]	104459450	104505819	3
ENSMUSG00000046805	-0.00123832	0.997356	-0.657677	0.000497696	Mpeg1	macrophage expressed gene 1 [Source:MGI Symbol;Acc:MGI:1333743]	12460779	12465283	1
ENSMUSG00000029245	0.853988	0.163139	1.88697	0.000498013	Epha5	Eph receptor A5 [Source:MGI Symbol;Acc:MGI:99654]	84054761	84417382	11
ENSMUSG00000033200	0.0884738	0.832523	0.899943	0.00049961	Tpsg1	tryptase gamma 1 [Source:MGI Symbol;Acc:MGI:1349391]	25369273	25374442	5
ENSMUSG00000031995	-0.277766	0.165295	-0.556035	0.000502218	St14	suppression of tumorigenicity 14 (colon carcinoma) [Source:MGI Symbol;Acc:MGI:1338881]	31089402	31131853	6
ENSMUSG00000040435	-0.0417479	0.919719	-0.825118	0.000504798	Ppp1r15a	protein phosphatase 1, regulatory subunit 15A [Source:MGI Symbol;Acc:MGI:1927072]	45522916	45526268	3
ENSMUSG00000021379	0.309818	0.471684	1.10355	0.000505766	Id4	inhibitor of DNA binding 4 [Source:MGI Symbol;Acc:MGI:99414]	48261228	48266026	1
ENSMUSG00000022861	-0.149295	0.824596	1.50064	0.000505766	Dgkg	diacylglycerol kinase, gamma [Source:MGI Symbol;Acc:MGI:105060]	22468461	22657221	5
ENSMUSG00000066191	-0.052811	0.939163	1.39113	0.000507965	Anks6	ankyrin repeat and sterile alpha motif domain containing 6 [Source:MGI Symbol;Acc:MGI:1922941]	47015669	47057427	5
ENSMUSG00000026674	0.370147	0.254439	0.8803	0.00051054	Ddr2	discoidin domain receptor family, member 2 [Source:MGI Symbol;Acc:MGI:1345277]	169972307	170110762	6
ENSMUSG00000022788	0.254042	0.214316	0.560064	0.00051054	Fgd4	FYVE, RhoGEF and PH domain containing 4 [Source:MGI Symbol;Acc:MGI:2183747]	16416917	16600549	12
ENSMUSG00000033152	0.197066	0.739743	1.38551	0.00051054	Podxl2	podocalyxin-like 2 [Source:MGI Symbol;Acc:MGI:2442488]	88842558	88875044	12
ENSMUSG00000022124	0.213907	0.42968	0.702046	0.00051054	Fbxl3	F-box and leucine-rich repeat protein 3 [Source:MGI Symbol;Acc:MGI:1354702]	103080239	103099566	7
ENSMUSG00000032452	-0.523227	0.462953	2.68423	0.00051054	Clstn2	calsyntenin 2 [Source:MGI Symbol;Acc:MGI:1929897]	97444395	98033181	2
ENSMUSG00000021987	0.0653395	0.680386	0.373446	0.000511348	Mtmr6	myotubularin related protein 6 [Source:MGI Symbol;Acc:MGI:2145637]	60265228	60302370	4
ENSMUSG00000024727	-0.127194	0.85321	1.45993	0.000511348	Trpm6	transient receptor potential cation channel, subfamily M, member 6 [Source:MGI Symbol;Acc:MGI:2675603]	18749983	18892511	4
ENSMUSG00000108084	-0.234644	0.731862	1.64868	0.000515639	Gm7932	predicted gene 7932 [Source:MGI Symbol;Acc:MGI:3643446]	48860329	48866083	2
ENSMUSG00000040387	0.359698	0.42968	1.21022	0.00051704	Klhl32	kelch-like 32 [Source:MGI Symbol;Acc:MGI:3612790]	24612554	24851124	7
ENSMUSG00000003992	0.374977	0.345314	1.05738	0.000518376	Ssbp2	single-stranded DNA binding protein 2 [Source:MGI Symbol;Acc:MGI:1914220]	91460283	91703429	10
ENSMUSG00000004360	0.651682	0.299521	1.73867	0.00051849	9330159F19Rik	RIKEN cDNA 9330159F19 gene [Source:MGI Symbol;Acc:MGI:3036239]	29211606	29230779	3
ENSMUSG00000045613	0.104131	0.818936	0.983139	0.000520787	Chrm2	cholinergic receptor, muscarinic 2, cardiac [Source:MGI Symbol;Acc:MGI:88397]	36388084	36528414	2
ENSMUSG00000058297	0.446952	0.248261	1.05619	0.000522986	Spock2	sparc/osteonectin, cwcv and kazal-like domains proteoglycan 2 [Source:MGI Symbol;Acc:MGI:1891351]	60106219	60135198	3
ENSMUSG00000063558	0.458015	0.330748	1.28446	0.000523732	Aox1	aldehyde oxidase 1 [Source:MGI Symbol;Acc:MGI:88035]	58029931	58106413	2
ENSMUSG00000073405	-0.0729905	0.826215	-0.711026	0.000523732	H2-T-ps	histocompatibility 2, T region locus, pseudogene [Source:MGI Symbol;Acc:MGI:2442805]	36109234	36111658	1
ENSMUSG00000054855	0.0948642	0.825431	-0.90038	0.000523732	Rnd1	Rho family GTPase 1 [Source:MGI Symbol;Acc:MGI:2444878]	98663421	98677461	3
ENSMUSG00000034786	0.195282	0.517667	-0.756493	0.000523914	Gpsm3	G-protein signalling modulator 3 (AGS3-like, C. elegans) [Source:MGI Symbol;Acc:MGI:2146785]	34589806	34591754	3
ENSMUSG00000045639	-0.0109541	0.973486	0.612963	0.000524485	Zfp629	zinc finger protein 629 [Source:MGI Symbol;Acc:MGI:2444524]	127607031	127615797	9
ENSMUSG00000024242	-0.0248262	0.896943	0.392428	0.000525245	Map4k3	mitogen-activated protein kinase kinase kinase kinase 3 [Source:MGI Symbol;Acc:MGI:2154405]	80580512	80728485	8
ENSMUSG00000052631	0.300468	0.445937	1.05847	0.00052592	Sh2d6	SH2 domain containing 6 [Source:MGI Symbol;Acc:MGI:1918380]	72513641	72521707	10
ENSMUSG00000027086	-0.0666538	0.691195	0.400975	0.00052592	Fastkd1	FAST kinase domains 1 [Source:MGI Symbol;Acc:MGI:2444596]	69686815	69713516	4
ENSMUSG00000063428	0.384792	0.454795	1.35023	0.000526063	Ddo	D-aspartate oxidase [Source:MGI Symbol;Acc:MGI:1925528]	40630011	40681847	7
ENSMUSG00000035580	-0.517502	0.619034	3.66404	0.000526086	Kcnh8	potassium voltage-gated channel, subfamily H (eag-related), member 8 [Source:MGI Symbol;Acc:MGI:2445160]	52602709	52979194	2
ENSMUSG00000026574	0.452995	0.220645	1.00722	0.000527034	Dpt	dermatopontin [Source:MGI Symbol;Acc:MGI:1928392]	164796644	164824266	1
ENSMUSG00000039676	0.271203	0.751087	1.94312	0.000527034	Capsl	calcyphosine-like [Source:MGI Symbol;Acc:MGI:1922818]	9436028	9466038	2
ENSMUSG00000028469	0.344442	0.34301	0.963226	0.000527034	Npr2	natriuretic peptide receptor 2 [Source:MGI Symbol;Acc:MGI:97372]	43631935	43651244	10
ENSMUSG00000042797	-0.303814	0.511341	1.18033	0.000527034	Aqp11	aquaporin 11 [Source:MGI Symbol;Acc:MGI:1913583]	97724006	97738289	5
ENSMUSG00000026942	-0.0443263	0.824852	-0.429195	0.000527034	Traf2	TNF receptor-associated factor 2 [Source:MGI Symbol;Acc:MGI:101835]	25517982	25546940	3
ENSMUSG00000047146	0.33444	0.61514	1.68574	0.000527034	Tet1	tet methylcytosine dioxygenase 1 [Source:MGI Symbol;Acc:MGI:1098693]	62804570	62908996	10
ENSMUSG00000022853	-0.0935378	0.728639	0.61721	0.000532985	Ehhadh	enoyl-Coenzyme A, hydratase/3-hydroxyacyl Coenzyme A dehydrogenase [Source:MGI Symbol;Acc:MGI:1277964]	21761287	21787807	1
ENSMUSG00000029802	0.736037	0.0713305	1.15679	0.000533529	Abcg2	ATP binding cassette subfamily G member 2 (Junior blood group) [Source:MGI Symbol;Acc:MGI:1347061]	58584523	58695676	13
ENSMUSG00000005338	0.101524	0.850731	1.15858	0.000535335	Cadm3	cell adhesion molecule 3 [Source:MGI Symbol;Acc:MGI:2137858]	173333258	173367695	5
ENSMUSG00000024112	0.405627	0.334833	1.11075	0.000536659	Cacna1h	calcium channel, voltage-dependent, T type, alpha 1H subunit [Source:MGI Symbol;Acc:MGI:1928842]	25374285	25433783	10
ENSMUSG00000028035	0.317667	0.382112	0.95471	0.000536987	Dnajb4	DnaJ heat shock protein family (Hsp40) member B4 [Source:MGI Symbol;Acc:MGI:1914285]	152178511	152210302	7
ENSMUSG00000031010	-0.0445219	0.802811	0.387381	0.00053727	Usp9x	ubiquitin specific peptidase 9, X chromosome [Source:MGI Symbol;Acc:MGI:894681]	13071498	13173328	7
ENSMUSG00000025175	0.037948	0.979635	2.93991	0.00053743	Fn3k	fructosamine 3 kinase [Source:MGI Symbol;Acc:MGI:1926834]	121434913	121450491	3
ENSMUSG00000000253	-0.0583656	0.910207	1.04532	0.000540881	Gmpr	guanosine monophosphate reductase [Source:MGI Symbol;Acc:MGI:1913605]	45507444	45553800	4
ENSMUSG00000021367	-0.626287	0.414078	1.99202	0.000540881	Edn1	endothelin 1 [Source:MGI Symbol;Acc:MGI:95283]	42301476	42307990	1
ENSMUSG00000057191	0.271948	0.500919	-1.0077	0.000540881	AB124611	cDNA sequence AB124611 [Source:MGI Symbol;Acc:MGI:3043001]	21526176	21545333	3
ENSMUSG00000052229	0.395141	0.302324	1.04028	0.000540881	Gpr17	G protein-coupled receptor 17 [Source:MGI Symbol;Acc:MGI:3584514]	31942997	31949636	1
ENSMUSG00000097615	0.721732	0.758135	5.61694	0.000540881	Gm2061	predicted gene 2061 [Source:MGI Symbol;Acc:MGI:3780228]	185447116	185455568	1
ENSMUSG00000041225	0.17147	0.260767	0.410248	0.000542257	Arhgap12	Rho GTPase activating protein 12 [Source:MGI Symbol;Acc:MGI:1922665]	6024427	6136098	15
ENSMUSG00000021298	0.408297	0.28695	-1.00628	0.000542355	Gpr132	G protein-coupled receptor 132 [Source:MGI Symbol;Acc:MGI:1890220]	112850873	112868228	2
ENSMUSG00000048264	-0.0247846	0.947099	0.736174	0.000547325	Dip2c	disco interacting protein 2 homolog C [Source:MGI Symbol;Acc:MGI:1920179]	9276528	9668928	4
ENSMUSG00000029781	-0.216986	0.508818	0.826341	0.000547759	Fkbp9	FK506 binding protein 9 [Source:MGI Symbol;Acc:MGI:1350921]	56832059	56879358	2
ENSMUSG00000031700	-0.125454	0.809261	1.12598	0.000547759	Gpt2	glutamic pyruvate transaminase (alanine aminotransferase) 2 [Source:MGI Symbol;Acc:MGI:1915391]	85492576	85527560	5
ENSMUSG00000056234	0.0843632	0.682508	0.483077	0.000550126	Ncoa4	nuclear receptor coactivator 4 [Source:MGI Symbol;Acc:MGI:1350932]	32159865	32179855	13
ENSMUSG00000021786	-0.0429226	0.828994	0.427583	0.000551041	Oxsm	3-oxoacyl-ACP synthase, mitochondrial [Source:MGI Symbol;Acc:MGI:1918397]	16238652	16249808	4
ENSMUSG00000026723	0.44139	0.299042	1.14156	0.000551483	Trdmt1	tRNA aspartic acid methyltransferase 1 [Source:MGI Symbol;Acc:MGI:1274787]	13509014	13544668	3
ENSMUSG00000053182	-0.220757	0.784501	1.80488	0.000552389	Gm609	predicted gene 609 [Source:MGI Symbol;Acc:MGI:2685455]	45411768	45492969	3
ENSMUSG00000017119	-0.115926	0.537451	0.468725	0.000555657	Nbr1	NBR1, autophagy cargo receptor [Source:MGI Symbol;Acc:MGI:108498]	101552149	101581951	21
ENSMUSG00000015340	0.076668	0.855701	-0.884802	0.000559199	Cybb	cytochrome b-245, beta polypeptide [Source:MGI Symbol;Acc:MGI:88574]	9435252	9487771	5
ENSMUSG00000026932	0.0135016	0.965059	0.586486	0.000559473	Nacc2	nucleus accumbens associated 2, BEN and BTB (POZ) domain containing [Source:MGI Symbol;Acc:MGI:1915241]	26055535	26123220	8
ENSMUSG00000026398	-0.262739	0.528609	1.04349	0.00056162	Nr5a2	nuclear receptor subfamily 5, group A, member 2 [Source:MGI Symbol;Acc:MGI:1346834]	136842571	136960448	6
ENSMUSG00000021903	0.391519	0.573692	1.72535	0.000567379	Galnt15	polypeptide N-acetylgalactosaminyltransferase 15 [Source:MGI Symbol;Acc:MGI:1926004]	32028989	32062197	2
ENSMUSG00000027397	0.0940425	0.8998	1.51074	0.000569789	Slc20a1	solute carrier family 20, member 1 [Source:MGI Symbol;Acc:MGI:108392]	129198764	129211616	8
ENSMUSG00000032502	0.188587	0.770028	1.4631	0.00057017	Stac	src homology three (SH3) and cysteine rich domain [Source:MGI Symbol;Acc:MGI:1201400]	111561437	111690348	3
ENSMUSG00000092519			3.62178	0.000570251	Actl9	actin-like 9 [Source:MGI Symbol;Acc:MGI:1916731]	33432896	33434268	1
ENSMUSG00000019817	0.428828	0.408735	1.36521	0.000572033	Plagl1	pleiomorphic adenoma gene-like 1 [Source:MGI Symbol;Acc:MGI:1100874]	13060504	13131694	25
ENSMUSG00000064325	-0.192805	0.847523	2.12773	0.00057501	Hhip	Hedgehog-interacting protein [Source:MGI Symbol;Acc:MGI:1341847]	79965851	80058006	2
ENSMUSG00000064339	0.881816	0.165038	1.7445	0.00057501	mt-Rnr2	mitochondrially encoded 16S rRNA [Source:MGI Symbol;Acc:MGI:102492]	1094	2675	1
ENSMUSG00000024598	0.606838	0.301309	1.59498	0.000576451	Fbn2	fibrillin 2 [Source:MGI Symbol;Acc:MGI:95490]	58008623	58210487	6
ENSMUSG00000053746	-0.0320674	0.941998	-0.844522	0.000578698	Ptrh1	peptidyl-tRNA hydrolase 1 homolog [Source:MGI Symbol;Acc:MGI:1913779]	32775786	32777597	3
ENSMUSG00000041268	0.339044	0.198049	0.730409	0.000581029	Dmxl2	Dmx-like 2 [Source:MGI Symbol;Acc:MGI:2444630]	54365158	54501626	8
ENSMUSG00000076535	-1.78757	0.0753319	-2.82487	0.000584986	Igkv1-88	immunoglobulin kappa chain variable 1-88 [Source:MGI Symbol;Acc:MGI:4439828]	68862265	68863031	1
ENSMUSG00000026207	0.474001	0.250949	1.10983	0.000586412	Speg	SPEG complex locus [Source:MGI Symbol;Acc:MGI:109282]	75375297	75432320	15
ENSMUSG00000006386	0.230599	0.573443	1.01987	0.00058669	Tek	TEK receptor tyrosine kinase [Source:MGI Symbol;Acc:MGI:98664]	94739289	94874976	4
ENSMUSG00000034308	-0.122225	0.641733	0.6282	0.000587572	Sdr42e1	short chain dehydrogenase/reductase family 42E, member 1 [Source:MGI Symbol;Acc:MGI:1921282]	117661399	117673689	3
ENSMUSG00000021704	0.216302	0.136455	0.406265	0.000587572	Mtx3	metaxin 3 [Source:MGI Symbol;Acc:MGI:2686040]	92844760	92858230	3
ENSMUSG00000034387	1.07212	0.121347	2.20558	0.000587585	Ssu2	ssu-2 homolog (C. elegans) [Source:MGI Symbol;Acc:MGI:2443733]	112359324	112388023	3
ENSMUSG00000013033	0.324491	0.452421	1.10159	0.000588649	Adgrl1	adhesion G protein-coupled receptor L1 [Source:MGI Symbol;Acc:MGI:1929461]	83900105	83941954	10
ENSMUSG00000033214	0.597094	0.307688	1.81322	0.000588649	Slitrk5	SLIT and NTRK-like family, member 5 [Source:MGI Symbol;Acc:MGI:2679448]	111675097	111683141	2
ENSMUSG00000048070	0.392124	0.400982	1.24354	0.000589916	Pirt	phosphoinositide-interacting regulator of transient receptor potential channels [Source:MGI Symbol;Acc:MGI:2443635]	66911981	66929876	1
ENSMUSG00000003762	-0.193653	0.311935	-0.504379	0.000589916	Coq8b	coenzyme Q8B [Source:MGI Symbol;Acc:MGI:1924139]	27233023	27257950	7
ENSMUSG00000037921	0.342047	0.492403	1.25109	0.000589916	Ddx60	DEAD (Asp-Glu-Ala-Asp) box polypeptide 60 [Source:MGI Symbol;Acc:MGI:2384570]	61928087	62038244	6
ENSMUSG00000021482	0.241737	0.354003	0.679899	0.000590541	Aaed1	AhpC/TSA antioxidant enzyme domain containing 1 [Source:MGI Symbol;Acc:MGI:1913379]	64275280	64312710	7
ENSMUSG00000060002	0.186892	0.60687	0.87248	0.000591746	Chpt1	choline phosphotransferase 1 [Source:MGI Symbol;Acc:MGI:2384841]	88452745	88504073	9
ENSMUSG00000029368	-0.286691	0.840153	3.11037	0.000591746	Alb	albumin [Source:MGI Symbol;Acc:MGI:87991]	90460897	90476602	3
ENSMUSG00000026173	0.546973	0.225221	1.29771	0.000594896	Plcd4	phospholipase C, delta 4 [Source:MGI Symbol;Acc:MGI:107469]	74542888	74567794	11
ENSMUSG00000009563	-0.178663	0.414042	-0.561912	0.00059634	Tor2a	torsin family 2, member A [Source:MGI Symbol;Acc:MGI:1353596]	32757234	32762244	8
ENSMUSG00000027955	0.156564	0.754825	1.12532	0.000597636	Fam198b	family with sequence similarity 198, member B [Source:MGI Symbol;Acc:MGI:1915909]	79884533	79946280	5
ENSMUSG00000028476	0.225469	0.622505	1.10975	0.000600867	Reck	reversion-inducing-cysteine-rich protein with kazal motifs [Source:MGI Symbol;Acc:MGI:1855698]	43875530	43944806	3
ENSMUSG00000032034	0.348269	0.613067	1.81133	0.000605992	Kcnj5	potassium inwardly-rectifying channel, subfamily J, member 5 [Source:MGI Symbol;Acc:MGI:104755]	32314707	32344350	3
ENSMUSG00000069206	0.368278	0.331646	1.00401	0.000606708	Zfp874a	zinc finger protein 874a [Source:MGI Symbol;Acc:MGI:3040703]	67424549	67451624	9
ENSMUSG00000108621	0.36338	0.149344	0.696702	0.000608795	Gm37494	predicted gene, 37494 [Source:MGI Symbol;Acc:MGI:5610722]	39544402	39580589	4
ENSMUSG00000016496	-0.187989	0.710354	-1.15393	0.000608795	Cd274	CD274 antigen [Source:MGI Symbol;Acc:MGI:1926446]	29367455	29388095	1
ENSMUSG00000062866	0.184187	0.417904	0.586107	0.000610149	Phactr2	phosphatase and actin regulator 2 [Source:MGI Symbol;Acc:MGI:2446138]	13207717	13474412	5
ENSMUSG00000058897	0.508185	0.443961	1.85219	0.000611795	Col25a1	collagen, type XXV, alpha 1 [Source:MGI Symbol;Acc:MGI:1924268]	130131501	130599877	6
ENSMUSG00000075334	-0.261837	0.62167	1.3089	0.000615259	Rprm	reprimo, TP53 dependent G2 arrest mediator candidate [Source:MGI Symbol;Acc:MGI:1915124]	54084093	54085552	1
ENSMUSG00000019852	-0.0923388	0.72734	0.597159	0.000615259	Arfgef3	ARFGEF family member 3 [Source:MGI Symbol;Acc:MGI:106387]	18581839	18743949	2
ENSMUSG00000031155	0.00883976	0.980965	-0.6511	0.000615259	Pim2	proviral integration site 2 [Source:MGI Symbol;Acc:MGI:97587]	7878262	7883432	4
ENSMUSG00000049090	-0.102	0.27684	0.25064	0.000615259	Zadh2	zinc binding alcohol dehydrogenase, domain containing 2 [Source:MGI Symbol;Acc:MGI:2444835]	84088063	84097528	2
ENSMUSG00000004347	0.24456	0.699776	1.52156	0.000620139	Pde1c	phosphodiesterase 1C [Source:MGI Symbol;Acc:MGI:108413]	56069804	56569103	14
ENSMUSG00000037455	-0.0250086	0.912679	0.455201	0.000620765	Slc18b1	solute carrier family 18, subfamily B, member 1 [Source:MGI Symbol;Acc:MGI:1923556]	23796986	23827968	6
ENSMUSG00000032194	0.114452	0.789391	0.925878	0.000621258	Kank2	KN motif and ankyrin repeat domains 2 [Source:MGI Symbol;Acc:MGI:2384568]	21766784	21798744	3
ENSMUSG00000061825	0.324865	0.432997	1.05681	0.000621671	Ces2c	carboxylesterase 2C [Source:MGI Symbol;Acc:MGI:2385905]	104847068	104854483	2
ENSMUSG00000068794	0.0131583	0.980332	0.968891	0.000624862	Col28a1	collagen, type XXVIII, alpha 1 [Source:MGI Symbol;Acc:MGI:2685312]	7997808	8192617	4
ENSMUSG00000083282	-0.125363	0.848184	1.38625	0.000625928	Ctsf	cathepsin F [Source:MGI Symbol;Acc:MGI:1861434]	4855130	4860918	12
ENSMUSG00000048285	0.264984	0.357999	0.750151	0.000626024	Frmd6	FERM domain containing 6 [Source:MGI Symbol;Acc:MGI:2442579]	70825514	70902234	4
ENSMUSG00000036832	0.0962981	0.922546	2.10528	0.000626024	Lpar3	lysophosphatidic acid receptor 3 [Source:MGI Symbol;Acc:MGI:1929469]	146220963	146286186	1
ENSMUSG00000055493	0.334775	0.432905	1.11852	0.000626223	Epm2a	epilepsy, progressive myoclonic epilepsy, type 2 gene alpha [Source:MGI Symbol;Acc:MGI:1341085]	11343404	11459644	2
ENSMUSG00000039501	-0.314026	0.107251	-0.541999	0.000630551	Znfx1	zinc finger, NFX1-type containing 1 [Source:MGI Symbol;Acc:MGI:2138982]	167035793	167063015	5
ENSMUSG00000035437	0.111352	0.438453	0.368498	0.000636247	Rabgap1	RAB GTPase activating protein 1 [Source:MGI Symbol;Acc:MGI:2385139]	37443279	37566454	10
ENSMUSG00000037032	0.225106	0.539829	0.915183	0.000637535	Apbb1	amyloid beta (A4) precursor protein-binding, family B, member 1 [Source:MGI Symbol;Acc:MGI:107765]	105558483	105581653	21
ENSMUSG00000070469	0.747809	0.0382282	1.03584	0.000637535	Adamtsl3	ADAMTS-like 3 [Source:MGI Symbol;Acc:MGI:3028499]	82335694	82614450	5
ENSMUSG00000024743	-0.388405	0.423272	1.23856	0.00064155	Syt7	synaptotagmin VII [Source:MGI Symbol;Acc:MGI:1859545]	10389090	10453180	15
ENSMUSG00000041141	-0.0187487	0.983753	1.7038	0.00064155	Pnmal1	PNMA-like 1 [Source:MGI Symbol;Acc:MGI:1918941]	16959679	16964607	1
ENSMUSG00000033327	0.366689	0.509925	1.38107	0.00064322	Tnxb	tenascin XB [Source:MGI Symbol;Acc:MGI:1932137]	34670535	34719815	2
ENSMUSG00000039103	0.27153	0.432857	0.886001	0.00064322	Nexn	nexilin [Source:MGI Symbol;Acc:MGI:1916060]	152236982	152266350	16
ENSMUSG00000020674	0.0942111	0.843904	1.00583	0.000651932	Pxdn	peroxidasin [Source:MGI Symbol;Acc:MGI:1916925]	29937608	30017658	8
ENSMUSG00000021217	0.261049	0.575956	1.16226	0.000651932	Tshz3	teashirt zinc finger family member 3 [Source:MGI Symbol;Acc:MGI:2442819]	36698118	36773553	2
ENSMUSG00000028635	-0.244883	0.742742	1.68359	0.00065255	Edn2	endothelin 2 [Source:MGI Symbol;Acc:MGI:95284]	120161206	120167360	1
ENSMUSG00000034842	0.564703	0.207056	1.20985	0.000655092	Art3	ADP-ribosyltransferase 3 [Source:MGI Symbol;Acc:MGI:1202729]	92331827	92414628	19
ENSMUSG00000031352	0.146875	0.187344	0.30481	0.000655389	Hccs	holocytochrome c synthetase [Source:MGI Symbol;Acc:MGI:106911]	169250193	169320372	3
ENSMUSG00000022330	1.71854	0.0548595	2.66682	0.000656073	Osr2	odd-skipped related 2 [Source:MGI Symbol;Acc:MGI:1930813]	35296098	35303305	5
ENSMUSG00000034109	-0.107704	0.648245	0.554921	0.000659227	Golim4	golgi integral membrane protein 4 [Source:MGI Symbol;Acc:MGI:1920374]	75875084	75956949	9
ENSMUSG00000025777	0.25813	0.775696	2.10062	0.000659227	Gdap1	ganglioside-induced differentiation-associated-protein 1 [Source:MGI Symbol;Acc:MGI:1338002]	17145362	17164271	4
ENSMUSG00000096472	-0.235262	0.263867	-0.556377	0.000659227	Cdkn2d	cyclin dependent kinase inhibitor 2D [Source:MGI Symbol;Acc:MGI:105387]	21288410	21291407	3
ENSMUSG00000074415	0.387198	0.125539	0.699864	0.000661178	3110039I08Rik	RIKEN cDNA 3110039I08 gene [Source:MGI Symbol;Acc:MGI:1920394]	41327077	41716994	48
ENSMUSG00000031284	0.133597	0.845628	1.53866	0.000661178	Pak3	p21 (RAC1) activated kinase 3 [Source:MGI Symbol;Acc:MGI:1339656]	143518591	143797796	10
ENSMUSG00000024975	-0.237378	0.536622	0.944987	0.000662336	Pdcd4	programmed cell death 4 [Source:MGI Symbol;Acc:MGI:107490]	53892231	53929860	6
ENSMUSG00000025178	-0.177613	0.227078	-0.393419	0.00066335	Pi4k2a	phosphatidylinositol 4-kinase type 2 alpha [Source:MGI Symbol;Acc:MGI:1934031]	42090470	42122087	4
ENSMUSG00000027854	0.0339102	0.904147	0.559783	0.000664728	Sike1	suppressor of IKBKE 1 [Source:MGI Symbol;Acc:MGI:1913891]	102995708	103008459	6
ENSMUSG00000061906			5.30246	0.000666949	Ugt2b38	UDP glucuronosyltransferase 2 family, polypeptide B38 [Source:MGI Symbol;Acc:MGI:2140794]	87409942	87424203	1
ENSMUSG00000026604	0.181604	0.626407	0.885111	0.000669451	Ptpn14	protein tyrosine phosphatase, non-receptor type 14 [Source:MGI Symbol;Acc:MGI:102467]	189728268	189876695	6
ENSMUSG00000048307	-0.0980611	0.444512	0.329949	0.000669592	Ankrd46	ankyrin repeat domain 46 [Source:MGI Symbol;Acc:MGI:1916089]	36477668	36496820	5
ENSMUSG00000082087	0.034374	0.910217	0.617518	0.000674573	Gm12138	predicted gene 12138 [Source:MGI Symbol;Acc:MGI:3651749]	40672906	40673856	1
ENSMUSG00000040009	0.295125	0.458139	1.0551	0.000674674	Gnaz	guanine nucleotide binding protein, alpha z subunit [Source:MGI Symbol;Acc:MGI:95780]	74967177	75016907	3
ENSMUSG00000048078	0.0146534	0.98624	1.5459	0.000674674	Tenm4	teneurin transmembrane protein 4 [Source:MGI Symbol;Acc:MGI:2447063]	96171246	96911093	12
ENSMUSG00000022995	0.186848	0.607626	0.866647	0.000674674	Enah	ENAH actin regulator [Source:MGI Symbol;Acc:MGI:108360]	181896384	182019990	16
ENSMUSG00000029130	0.114254	0.823387	1.09377	0.000674674	Rnf32	ring finger protein 32 [Source:MGI Symbol;Acc:MGI:1861747]	29195992	29228457	12
ENSMUSG00000061601	-0.148555	0.834566	1.56965	0.000675472	Pclo	piccolo (presynaptic cytomatrix protein) [Source:MGI Symbol;Acc:MGI:1349390]	14514918	14863459	4
ENSMUSG00000024431	0.131537	0.407857	0.406094	0.000679038	Nr3c1	nuclear receptor subfamily 3, group C, member 1 [Source:MGI Symbol;Acc:MGI:95824]	39410545	39519421	9
ENSMUSG00000032449	0.0704478	0.828016	0.682837	0.000679625	Slc25a36	solute carrier family 25, member 36 [Source:MGI Symbol;Acc:MGI:1924909]	97074961	97111157	9
ENSMUSG00000016349	0.282178	0.570296	1.25789	0.000681809	Eef1a2	eukaryotic translation elongation factor 1 alpha 2 [Source:MGI Symbol;Acc:MGI:1096317]	181147653	181157014	1
ENSMUSG00000006360	0.393197	0.438401	1.28296	0.000683195	Crip1	cysteine-rich protein 1 (intestinal) [Source:MGI Symbol;Acc:MGI:88501]	113146316	113153879	6
ENSMUSG00000111521	0.257687	0.479532	0.905311	0.000684619	Gm48529	predicted gene, 48529 [Source:MGI Symbol;Acc:MGI:6098068]	45930112	45933738	2
ENSMUSG00000049436	0.83862	0.0831014	1.36892	0.000686158	Upk1b	uroplakin 1B [Source:MGI Symbol;Acc:MGI:98912]	38773184	38800328	2
ENSMUSG00000036218	0.677134	0.341425	1.98169	0.000686158	Pdzrn4	PDZ domain containing RING finger 4 [Source:MGI Symbol;Acc:MGI:3056996]	92396881	92771819	4
ENSMUSG00000024395	0.248753	0.473269	0.868383	0.000686665	Lims2	LIM and senescent cell antigen like domains 2 [Source:MGI Symbol;Acc:MGI:2385067]	31922290	31958619	12
ENSMUSG00000024972	-0.119614	0.751935	0.837453	0.000687047	Lgals12	lectin, galactose binding, soluble 12 [Source:MGI Symbol;Acc:MGI:1929094]	7596660	7607193	3
ENSMUSG00000061171	0.0390053	0.977375	2.66842	0.000687047	Slc38a11	solute carrier family 38, member 11 [Source:MGI Symbol;Acc:MGI:2443383]	65316430	65364034	8
ENSMUSG00000061232	-0.136555	0.708561	-0.827109	0.000687047	H2-K1	histocompatibility 2, K1, K region [Source:MGI Symbol;Acc:MGI:95904]	33996017	34000347	16
ENSMUSG00000085651	-0.229421	0.562565	0.979656	0.000689162	Gm11695	predicted gene 11695 [Source:MGI Symbol;Acc:MGI:3649841]	115462045	115463454	1
ENSMUSG00000018672	0.14963	0.636154	0.752206	0.000695531	Copz2	coatomer protein complex, subunit zeta 2 [Source:MGI Symbol;Acc:MGI:1929008]	96849870	96861203	5
ENSMUSG00000068263	0.306547	0.5754	1.37763	0.000695531	Efcc1	EF hand and coiled-coil domain containing 1 [Source:MGI Symbol;Acc:MGI:3611451]	87730869	87755908	5
ENSMUSG00000026915	-0.0226186	0.888926	0.328722	0.00069917	Strbp	spermatid perinuclear RNA binding protein [Source:MGI Symbol;Acc:MGI:104626]	37483228	37703859	9
ENSMUSG00000028528	0.70932	0.0264327	0.961613	0.00069917	Dnajc6	DnaJ heat shock protein family (Hsp40) member C6 [Source:MGI Symbol;Acc:MGI:1919935]	101496648	101642799	8
ENSMUSG00000023886	0.221739	0.198615	0.466715	0.000699612	Smoc2	SPARC related modular calcium binding 2 [Source:MGI Symbol;Acc:MGI:1929881]	14279506	14404790	7
ENSMUSG00000078923	-0.419931	0.0209599	-0.517516	0.000699678	Ube2v1	ubiquitin-conjugating enzyme E2 variant 1 [Source:MGI Symbol;Acc:MGI:1913839]	167607638	167632095	7
ENSMUSG00000044921	-0.291453	0.614134	1.4065	0.000699678	Rassf9	Ras association (RalGDS/AF-6) domain family (N-terminal) member 9 [Source:MGI Symbol;Acc:MGI:2384307]	102512222	102549736	3
ENSMUSG00000100510	0.38515	0.363501	1.09484	0.000701367	Hand2os1	Hand2, opposite strand 1 [Source:MGI Symbol;Acc:MGI:5578769]	57281117	57324233	37
ENSMUSG00000039943	0.195495	0.458263	0.662513	0.000705483	Plcb4	phospholipase C, beta 4 [Source:MGI Symbol;Acc:MGI:107464]	135659011	136014593	15
ENSMUSG00000049122	0.482959	0.62575	2.44929	0.000705483	Frmd3	FERM domain containing 3 [Source:MGI Symbol;Acc:MGI:2442466]	74013442	74202214	3
ENSMUSG00000037325	0.0416076	0.853877	0.491259	0.000708944	Bbs7	Bardet-Biedl syndrome 7 (human) [Source:MGI Symbol;Acc:MGI:1918742]	36573142	36613477	6
ENSMUSG00000031425	0.203751	0.677141	1.15061	0.000712078	Plp1	proteolipid protein (myelin) 1 [Source:MGI Symbol;Acc:MGI:97623]	136822671	136839733	4
ENSMUSG00000029635	-0.0257934	0.874361	0.33508	0.000712078	Cdk8	cyclin-dependent kinase 8 [Source:MGI Symbol;Acc:MGI:1196224]	146231230	146302874	9
ENSMUSG00000058488			3.86522	0.000712078	Kl	klotho [Source:MGI Symbol;Acc:MGI:1101771]	150952607	150993817	2
ENSMUSG00000044528	0.264267	0.677615	1.69311	0.000714099	Tram1l1	translocation associated membrane protein 1-like 1 [Source:MGI Symbol;Acc:MGI:2443503]	124320855	124324743	1
ENSMUSG00000025407	0.458022	0.393729	1.38574	0.00071605	Gli1	GLI-Kruppel family member GLI1 [Source:MGI Symbol;Acc:MGI:95727]	127329882	127341974	5
ENSMUSG00000106896	-0.288203	0.780238	2.45986	0.000716214	G630022F23Rik	RIKEN cDNA G630022F23 gene [Source:MGI Symbol;Acc:MGI:3704248]	33720043	33723669	1
ENSMUSG00000021466	0.0447938	0.919818	0.866031	0.000719208	Ptch1	patched 1 [Source:MGI Symbol;Acc:MGI:105373]	63508328	63573598	10
ENSMUSG00000030409	0.421112	0.235142	0.939618	0.00071945	Dmpk	dystrophia myotonica-protein kinase [Source:MGI Symbol;Acc:MGI:94906]	19083849	19093821	18
ENSMUSG00000032648	0.376894	0.309991	0.984623	0.000722504	Pygm	muscle glycogen phosphorylase [Source:MGI Symbol;Acc:MGI:97830]	6384399	6398459	4
ENSMUSG00000006782	-0.265015	0.188229	-0.539536	0.000722835	Cnp	2',3'-cyclic nucleotide 3' phosphodiesterase [Source:MGI Symbol;Acc:MGI:88437]	100574904	100591729	4
ENSMUSG00000024927	-0.231096	0.222338	-0.502921	0.000722835	Rela	v-rel reticuloendotheliosis viral oncogene homolog A (avian) [Source:MGI Symbol;Acc:MGI:103290]	5637483	5648130	7
ENSMUSG00000018882	-0.295124	0.0812073	-0.468756	0.000722835	Mrpl45	mitochondrial ribosomal protein L45 [Source:MGI Symbol;Acc:MGI:1914286]	97315716	97329920	2
ENSMUSG00000116946	0.385969	0.136058	0.722358	0.000727976	Gm41442	predicted gene, 41442 [Source:MGI Symbol;Acc:MGI:5624327]	31233590	31248313	2
ENSMUSG00000045763	-0.189907	0.67285	-1.03014	0.000728785	Basp1	brain abundant, membrane attached signal protein 1 [Source:MGI Symbol;Acc:MGI:1917600]	25363277	25413764	2
ENSMUSG00000071414	-0.0714566	0.813767	0.64845	0.000732519	Gm6736	predicted gene 6736 [Source:MGI Symbol;Acc:MGI:3643048]	13455023	13455970	1
ENSMUSG00000078866	0.251533	0.263178	0.609493	0.000732519	Zfp970	zinc finger protein 970 [Source:MGI Symbol;Acc:MGI:3652255]	177464733	177478129	2
ENSMUSG00000009687	0.0343877	0.919719	-0.659681	0.000732519	Fxyd5	FXYD domain-containing ion transport regulator 5 [Source:MGI Symbol;Acc:MGI:1201785]	31032722	31042481	14
ENSMUSG00000018377	-0.0218266	0.939658	0.552719	0.000732732	Vezf1	vascular endothelial zinc finger 1 [Source:MGI Symbol;Acc:MGI:1313291]	88068279	88084729	2
ENSMUSG00000028532	-0.37369	0.393729	1.1176	0.00073804	Cachd1	cache domain containing 1 [Source:MGI Symbol;Acc:MGI:2444177]	100776675	101029220	4
ENSMUSG00000030866	-0.328543	0.342171	0.889638	0.000739114	Ern2	endoplasmic reticulum (ER) to nucleus signalling 2 [Source:MGI Symbol;Acc:MGI:1349436]	122169893	122186207	2
ENSMUSG00000034926	-0.473429	0.029938	-0.612419	0.000741399	Dhcr24	24-dehydrocholesterol reductase [Source:MGI Symbol;Acc:MGI:1922004]	106561038	106589113	1
ENSMUSG00000036278	-0.186053	0.635346	0.927736	0.000743734	Macrod1	MACRO domain containing 1 [Source:MGI Symbol;Acc:MGI:2147583]	7056810	7198057	1
ENSMUSG00000041482	-0.093786	0.853681	1.06512	0.000743734	Piezo2	piezo-type mechanosensitive ion channel component 2 [Source:MGI Symbol;Acc:MGI:1918781]	63010213	63387183	15
ENSMUSG00000044361	0.151701	0.844202	1.687	0.000751544	BC024139	cDNA sequence BC024139 [Source:MGI Symbol;Acc:MGI:2442591]	76119517	76126596	5
ENSMUSG00000037447	0.00782477	0.986031	-0.783305	0.000751544	Arid5a	AT rich interactive domain 5A (MRF1-like) [Source:MGI Symbol;Acc:MGI:2443039]	36307733	36324029	15
ENSMUSG00000050751	0.610994	0.388315	1.90272	0.000751544	Pgbd5	piggyBac transposable element derived 5 [Source:MGI Symbol;Acc:MGI:2429955]	124369049	124439658	6
ENSMUSG00000028173	0.0414429	0.843108	0.434007	0.00075462	Wls	wntless WNT ligand secretion mediator [Source:MGI Symbol;Acc:MGI:1915401]	159839672	159938664	7
ENSMUSG00000029095	0.271228	0.354789	0.766167	0.000756181	Ablim2	actin-binding LIM protein 2 [Source:MGI Symbol;Acc:MGI:2385758]	35757880	35884973	17
ENSMUSG00000040380	-0.283949	0.489668	1.05314	0.000756458	Cbln3	cerebellin 3 precursor protein [Source:MGI Symbol;Acc:MGI:1889286]	55878913	55884392	2
ENSMUSG00000020263	0.141824	0.671923	0.765884	0.000756988	Appl2	adaptor protein, phosphotyrosine interaction, PH domain and leucine zipper containing 2 [Source:MGI Symbol;Acc:MGI:2384914]	83600033	83648738	14
ENSMUSG00000086918	0.370005	0.503302	1.42645	0.000756988	4930429F24Rik	RIKEN cDNA 4930429F24 gene [Source:MGI Symbol;Acc:MGI:1921883]	79793641	79803235	1
ENSMUSG00000024429	-0.28621	0.147492	-0.534647	0.000756988	Gnl1	guanine nucleotide binding protein-like 1 [Source:MGI Symbol;Acc:MGI:95764]	35979851	35989462	2
ENSMUSG00000111006	0.1235	0.836672	1.28468	0.000756988	Gm10826	predicted gene 10826 [Source:MGI Symbol;Acc:MGI:3642318]	21030490	21033793	1
ENSMUSG00000029175	-0.152259	0.430616	-0.484622	0.000756988	Slc35f6	solute carrier family 35, member F6 [Source:MGI Symbol;Acc:MGI:1922169]	30647933	30659729	7
ENSMUSG00000034764	0.747802	0.299292	2.00114	0.000756988	1700006J14Rik	RIKEN cDNA 1700006J14 gene [Source:MGI Symbol;Acc:MGI:2447818]	120364157	120384336	4
ENSMUSG00000040170	0.412019	0.516253	1.55377	0.000758437	Fmo2	flavin containing monooxygenase 2 [Source:MGI Symbol;Acc:MGI:1916776]	162874317	162898726	7
ENSMUSG00000068284	-0.126637	0.700556	0.745153	0.000758437	Usf3	upstream transcription factor family member 3 [Source:MGI Symbol;Acc:MGI:2685454]	44173246	44227465	4
ENSMUSG00000022519	0.0566305	0.876733	0.781511	0.000758437	Srl	sarcalumenin [Source:MGI Symbol;Acc:MGI:2146620]	4480216	4541816	5
ENSMUSG00000036904	-0.199031	0.591443	0.889442	0.000764131	Fzd8	frizzled class receptor 8 [Source:MGI Symbol;Acc:MGI:108460]	9212163	9218136	1
ENSMUSG00000040006	0.111234	0.584778	0.486566	0.000769606	Ginm1	glycoprotein integral membrane 1 [Source:MGI Symbol;Acc:MGI:2384905]	7767947	7792824	6
ENSMUSG00000032593	-0.280212	0.37389	-0.801342	0.00076999	Amigo3	adhesion molecule with Ig like domain 3 [Source:MGI Symbol;Acc:MGI:2444854]	108053159	108055701	1
ENSMUSG00000049401	-0.0995875	0.695239	-0.575943	0.000770202	Ogfr	opioid growth factor receptor [Source:MGI Symbol;Acc:MGI:1919325]	180589245	180595836	2
ENSMUSG00000054099	0.238138	0.340639	0.641895	0.00077114	Slc25a40	solute carrier family 25, member 40 [Source:MGI Symbol;Acc:MGI:2442486]	8422850	8454797	8
ENSMUSG00000020017	0.259124	0.299185	-0.637841	0.00077114	Hal	histidine ammonia lyase [Source:MGI Symbol;Acc:MGI:96010]	93488768	93519304	4
ENSMUSG00000034353	0.0737314	0.902538	1.18607	0.000781954	Ramp1	receptor (calcitonin) activity modifying protein 1 [Source:MGI Symbol;Acc:MGI:1858418]	91179822	91225196	3
ENSMUSG00000068101	-0.725229	0.0876321	-1.16504	0.000782431	Cenpm	centromere protein M [Source:MGI Symbol;Acc:MGI:1913820]	82233779	82244748	6
ENSMUSG00000028926	0.0910464	0.780923	0.712732	0.000782431	Cdk14	cyclin-dependent kinase 14 [Source:MGI Symbol;Acc:MGI:894318]	4803391	5420312	15
ENSMUSG00000078954	-0.518799	0.113449	-0.89276	0.000782431	Arhgap8	Rho GTPase activating protein 8 [Source:MGI Symbol;Acc:MGI:1920417]	84720052	84772207	7
ENSMUSG00000020057	0.159371	0.570296	-0.668661	0.000782431	Dram1	DNA-damage regulated autophagy modulator 1 [Source:MGI Symbol;Acc:MGI:1918962]	88322804	88379080	3
ENSMUSG00000029168	0.10483	0.846045	1.26139	0.000784376	Dpysl5	dihydropyrimidinase-like 5 [Source:MGI Symbol;Acc:MGI:1929772]	30711564	30799375	7
ENSMUSG00000021806	0.23822	0.416574	0.756283	0.000784376	Nid2	nidogen 2 [Source:MGI Symbol;Acc:MGI:1298229]	19751265	19811787	4
ENSMUSG00000032609	0.59249	0.0378499	0.795557	0.000784396	Klhdc8b	kelch domain containing 8B [Source:MGI Symbol;Acc:MGI:1925517]	108447636	108461581	15
ENSMUSG00000040093	0.0141565	0.970704	0.704164	0.00078469	Bmf	BCL2 modifying factor [Source:MGI Symbol;Acc:MGI:2176433]	118528757	118549687	8
ENSMUSG00000032883	0.0349005	0.933485	0.796871	0.00078469	Acsl3	acyl-CoA synthetase long-chain family member 3 [Source:MGI Symbol;Acc:MGI:1921455]	78657825	78707743	7
ENSMUSG00000021982	0.114815	0.513514	0.431149	0.000785692	Cdadc1	cytidine and dCMP deaminase domain containing 1 [Source:MGI Symbol;Acc:MGI:1919141]	59559388	59597959	8
ENSMUSG00000002475	-0.0154311	0.981783	1.22954	0.000785718	Abhd3	abhydrolase domain containing 3 [Source:MGI Symbol;Acc:MGI:2147183]	10642092	10706771	5
ENSMUSG00000030341	-0.292943	0.320869	-0.756117	0.000788405	Tnfrsf1a	tumor necrosis factor receptor superfamily, member 1a [Source:MGI Symbol;Acc:MGI:1314884]	125349362	125362484	6
ENSMUSG00000069114	0.0242027	0.925686	0.497631	0.00079128	Zbtb10	zinc finger and BTB domain containing 10 [Source:MGI Symbol;Acc:MGI:2139883]	9250602	9285333	1
ENSMUSG00000033713	-0.108557	0.783369	0.839284	0.000791386	Foxn3	forkhead box N3 [Source:MGI Symbol;Acc:MGI:1918625]	99190078	99563582	14
ENSMUSG00000026781	0.13382	0.503348	0.489889	0.000791386	Acbd5	acyl-Coenzyme A binding domain containing 5 [Source:MGI Symbol;Acc:MGI:1921409]	23068167	23115558	18
ENSMUSG00000022472	-0.305305	0.166157	-0.590397	0.000791386	Desi1	desumoylating isopeptidase 1 [Source:MGI Symbol;Acc:MGI:106313]	81992523	82033862	6
ENSMUSG00000032839	0.229651	0.432997	0.75563	0.000791386	Trpc1	transient receptor potential cation channel, subfamily C, member 1 [Source:MGI Symbol;Acc:MGI:109528]	95705082	95750375	7
ENSMUSG00000079491	0.0673361	0.857948	-0.764614	0.000791531	H2-T10	histocompatibility 2, T region locus 10 [Source:MGI Symbol;Acc:MGI:95942]	36115876	36121465	3
ENSMUSG00000020160	0.465884	0.194116	0.958764	0.0007916	Meis1	Meis homeobox 1 [Source:MGI Symbol;Acc:MGI:104717]	18879817	19018985	9
ENSMUSG00000015405	-0.226797	0.752267	1.57803	0.000792574	Ace2	angiotensin I converting enzyme (peptidyl-dipeptidase A) 2 [Source:MGI Symbol;Acc:MGI:1917258]	164139332	164188420	3
ENSMUSG00000059839	0.22699	0.489352	0.8113	0.000796249	Zfp874b	zinc finger protein 874b [Source:MGI Symbol;Acc:MGI:3040702]	67471513	67484258	5
ENSMUSG00000029404	-0.199879	0.225169	-0.434053	0.000798332	Arl6ip4	ADP-ribosylation factor-like 6 interacting protein 4 [Source:MGI Symbol;Acc:MGI:1929500]	124116089	124118196	5
ENSMUSG00000005611	0.231059	0.596364	1.02837	0.000807901	Mrvi1	MRV integration site 1 [Source:MGI Symbol;Acc:MGI:1338023]	110868266	110982461	7
ENSMUSG00000066894	-0.194878	0.537669	0.764456	0.000812371	Vsig10	V-set and immunoglobulin domain containing 10 [Source:MGI Symbol;Acc:MGI:2448533]	117319083	117355005	6
ENSMUSG00000022197	0.100219	0.842297	1.04034	0.000812371	Pdzd2	PDZ domain containing 2 [Source:MGI Symbol;Acc:MGI:1922394]	12359711	12739924	9
ENSMUSG00000097002	0.705879	0.387847	2.39682	0.000815523	Gm2670	predicted gene 2670 [Source:MGI Symbol;Acc:MGI:3780839]	28508074	28511392	1
ENSMUSG00000044676	0.162967	0.471962	0.566854	0.000817789	Zfp612	zinc finger protein 612 [Source:MGI Symbol;Acc:MGI:2443465]	110079746	110092741	3
ENSMUSG00000032085	0.57906	0.0931864	0.941101	0.000824657	Tagln	transgelin [Source:MGI Symbol;Acc:MGI:106012]	45929619	45936058	3
ENSMUSG00000027977	0.592429	0.47875	2.23082	0.000826484	Ndst3	N-deacetylase/N-sulfotransferase (heparan glucosaminyl) 3 [Source:MGI Symbol;Acc:MGI:1932544]	123526166	123690853	9
ENSMUSG00000065592	0.651751	0.202644	1.47832	0.000827174	Mir145a	microRNA 145a [Source:MGI Symbol;Acc:MGI:2676830]	61647825	61647894	1
ENSMUSG00000043366	0.536982	0.18754	1.13574	0.000829423	Olfr78	olfactory receptor 78 [Source:MGI Symbol;Acc:MGI:2157548]	102738511	102759471	4
ENSMUSG00000030579	0.366063	0.205652	-0.760171	0.000829423	Tyrobp	TYRO protein tyrosine kinase binding protein [Source:MGI Symbol;Acc:MGI:1277211]	30413760	30417585	3
ENSMUSG00000037025	-0.374209	0.343283	1.008	0.000833137	Foxa2	forkhead box A2 [Source:MGI Symbol;Acc:MGI:1347476]	148042877	148046969	4
ENSMUSG00000106067	0.140249	0.846173	1.65082	0.000836495	Gm7902	predicted gene 7902 [Source:MGI Symbol;Acc:MGI:3645041]	133841573	133842519	1
ENSMUSG00000024236	0.277509	0.457349	0.922792	0.000836781	Svil	supervillin [Source:MGI Symbol;Acc:MGI:2147319]	4920540	5119299	15
ENSMUSG00000024901	0.353211	0.4251	1.16125	0.000836781	Peli3	pellino 3 [Source:MGI Symbol;Acc:MGI:1924963]	4929717	4943127	7
ENSMUSG00000112441	0.596467	0.30486	1.56289	0.000842486	Gm48898	predicted gene, 48898 [Source:MGI Symbol;Acc:MGI:6098663]	8291024	8293694	1
ENSMUSG00000056116	0.00039171	0.999068	-0.662319	0.000842542	H2-T22	histocompatibility 2, T region locus 22 [Source:MGI Symbol;Acc:MGI:95956]	36037128	36042747	5
ENSMUSG00000040836	-0.0124444	0.985213	1.20796	0.000845323	Gpr161	G protein-coupled receptor 161 [Source:MGI Symbol;Acc:MGI:2685054]	165295789	165326745	2
ENSMUSG00000043587	-0.27627	0.477694	0.95513	0.00084598	Pxylp1	2-phosphoxylose phosphatase 1 [Source:MGI Symbol;Acc:MGI:2442444]	96823336	96892669	13
ENSMUSG00000027208	0.122999	0.792705	0.997254	0.000849958	Fgf7	fibroblast growth factor 7 [Source:MGI Symbol;Acc:MGI:95521]	126034658	126091185	3
ENSMUSG00000049037	-0.189004	0.568482	-0.78506	0.000849958	Clec4a1	C-type lectin domain family 4, member a1 [Source:MGI Symbol;Acc:MGI:3036291]	122921848	122934619	1
ENSMUSG00000048388	0.57053	0.222749	1.25206	0.000852637	Fam171b	family with sequence similarity 171, member B [Source:MGI Symbol;Acc:MGI:2444579]	83812636	83883486	2
ENSMUSG00000048330	0.368141	0.387256	1.09897	0.000852637	Ric3	RIC3 acetylcholine receptor chaperone [Source:MGI Symbol;Acc:MGI:2443887]	109034312	109083331	6
ENSMUSG00000035107	-0.0663313	0.779553	0.505081	0.000856308	Dcbld2	discoidin, CUB and LCCL domain containing 2 [Source:MGI Symbol;Acc:MGI:1920629]	58408443	58469727	7
ENSMUSG00000002012	0.547516	0.21248	1.16314	0.000859421	Pnck	pregnancy upregulated non-ubiquitously expressed CaM kinase [Source:MGI Symbol;Acc:MGI:1347357]	73655994	73660117	5
ENSMUSG00000032268	0.431573	0.463645	1.52233	0.000863404	Tmprss5	transmembrane protease, serine 5 (spinesin) [Source:MGI Symbol;Acc:MGI:1933407]	49081260	49117587	7
ENSMUSG00000040268	0.0816185	0.789262	0.642931	0.000863404	Plekha1	pleckstrin homology domain containing, family A (phosphoinositide binding specific) member 1 [Source:MGI Symbol;Acc:MGI:2442213]	130865756	130913312	12
ENSMUSG00000047604	-0.260841	0.642304	1.29617	0.000863956	Frat2	frequently rearranged in advanced T cell lymphomas 2 [Source:MGI Symbol;Acc:MGI:2673967]	41845972	41848132	1
ENSMUSG00000071713	-0.00768981	0.987907	-0.929513	0.000863956	Csf2rb	colony stimulating factor 2 receptor, beta, low-affinity (granulocyte-macrophage) [Source:MGI Symbol;Acc:MGI:1339759]	78325752	78353847	8
ENSMUSG00000023055	-0.028409	0.94518	0.77132	0.000864041	Calcoco1	calcium binding and coiled coil domain 1 [Source:MGI Symbol;Acc:MGI:1914738]	102706777	102722178	9
ENSMUSG00000031561	2.97775e-05	0.999958	1.08529	0.000864041	Tenm3	teneurin transmembrane protein 3 [Source:MGI Symbol;Acc:MGI:1345183]	48227682	48843951	8
ENSMUSG00000024679	0.182211	0.688243	-1.01787	0.000867021	Ms4a6d	membrane-spanning 4-domains, subfamily A, member 6D [Source:MGI Symbol;Acc:MGI:1916024]	11586604	11604849	4
ENSMUSG00000027971	0.702311	0.231205	1.65159	0.000868279	Ndst4	N-deacetylase/N-sulfotransferase (heparin glucosaminyl) 4 [Source:MGI Symbol;Acc:MGI:1932545]	125404076	125728899	6
ENSMUSG00000004207	-0.210316	0.299185	-0.518182	0.000868279	Psap	prosaposin [Source:MGI Symbol;Acc:MGI:97783]	60277627	60302597	5
ENSMUSG00000019467	0.389091	0.193039	0.790651	0.000868619	Arhgef25	Rho guanine nucleotide exchange factor (GEF) 25 [Source:MGI Symbol;Acc:MGI:1277173]	127182525	127190083	12
ENSMUSG00000020027	0.26678	0.537239	1.04358	0.000876299	Socs2	suppressor of cytokine signaling 2 [Source:MGI Symbol;Acc:MGI:1201787]	95385362	95417180	14
ENSMUSG00000031661	0.319002	0.417421	0.982422	0.000889215	Nkd1	naked cuticle 1 [Source:MGI Symbol;Acc:MGI:2135954]	88521354	88594884	3
ENSMUSG00000005533	0.090704	0.762996	0.643681	0.000889215	Igf1r	insulin-like growth factor I receptor [Source:MGI Symbol;Acc:MGI:96433]	67952827	68233668	6
ENSMUSG00000033768	0.52898	0.252545	1.25318	0.000889215	Nrxn2	neurexin II [Source:MGI Symbol;Acc:MGI:1096362]	6418731	6544169	18
ENSMUSG00000112546	-0.415019	0.142446	-0.756489	0.000889215	Gm6992	predicted gene 6992 [Source:MGI Symbol;Acc:MGI:3647975]	31018218	31019824	1
ENSMUSG00000000594	0.078089	0.770064	-0.565068	0.000889215	Gm2a	GM2 ganglioside activator protein [Source:MGI Symbol;Acc:MGI:95762]	55098115	55113029	1
ENSMUSG00000049625	-0.0370801	0.922546	-0.72436	0.000889215	Tifab	TRAF-interacting protein with forkhead-associated domain, family member B [Source:MGI Symbol;Acc:MGI:2385852]	56173704	56178885	2
ENSMUSG00000024610	-0.345643	0.518086	-1.28894	0.000889215	Cd74	CD74 antigen (invariant polypeptide of major histocompatibility complex, class II antigen-associated) [Source:MGI Symbol;Acc:MGI:96534]	60803848	60812652	5
ENSMUSG00000021336	0.142308	0.754898	0.977097	0.000889215	Slc17a4	solute carrier family 17 (sodium phosphate), member 4 [Source:MGI Symbol;Acc:MGI:2442850]	23895890	23915009	5
ENSMUSG00000052160	0.0225378	0.954736	-0.737834	0.000889215	Pld4	phospholipase D family, member 4 [Source:MGI Symbol;Acc:MGI:2144765]	112760655	112768990	5
ENSMUSG00000050556	0.509622	0.163465	0.979543	0.000889526	Kcnb1	potassium voltage gated channel, Shab-related subfamily, member 1 [Source:MGI Symbol;Acc:MGI:96666]	167095969	167190155	4
ENSMUSG00000023150	0.0217822	0.928044	0.45755	0.000890383	Ivns1abp	influenza virus NS1A binding protein [Source:MGI Symbol;Acc:MGI:2152389]	151344477	151364422	5
ENSMUSG00000078190	0.534779	0.136382	0.98873	0.000890383	Dnm3os	dynamin 3, opposite strand [Source:MGI Symbol;Acc:MGI:3052332]	162217623	162225550	6
ENSMUSG00000004044	0.201005	0.568146	0.83428	0.000892904	Cavin1	caveolae associated 1 [Source:MGI Symbol;Acc:MGI:1277968]	100956733	100970887	2
ENSMUSG00000054404	-0.197289	0.601838	-0.878665	0.000892904	Slfn5	schlafen 5 [Source:MGI Symbol;Acc:MGI:1329004]	82951349	82964840	4
ENSMUSG00000097961	0.270686	0.607559	1.29215	0.000898196	Gm27000	predicted gene, 27000 [Source:MGI Symbol;Acc:MGI:5504115]	88759471	88760312	1
ENSMUSG00000023064	0.215311	0.689314	1.21934	0.000898492	Sncg	synuclein, gamma [Source:MGI Symbol;Acc:MGI:1298397]	34370274	34374789	1
ENSMUSG00000057880	-0.529407	0.375919	1.50361	0.000898621	Abat	4-aminobutyrate aminotransferase [Source:MGI Symbol;Acc:MGI:2443582]	8513429	8621568	7
ENSMUSG00000018830	0.149972	0.735695	0.960128	0.000900219	Myh11	myosin, heavy polypeptide 11, smooth muscle [Source:MGI Symbol;Acc:MGI:102643]	14194535	14291372	4
ENSMUSG00000017412	0.276841	0.619874	1.36441	0.000904439	Cacnb4	calcium channel, voltage-dependent, beta 4 subunit [Source:MGI Symbol;Acc:MGI:103301]	52428320	52676831	6
ENSMUSG00000108049	0.486393	0.363443	1.54937	0.000904439	Gm44168	predicted gene, 44168 [Source:MGI Symbol;Acc:MGI:5690560]	87986191	87989729	1
ENSMUSG00000010311	0.357887	0.407857	1.08673	0.000904863	Optc	opticin [Source:MGI Symbol;Acc:MGI:2151113]	133897199	133907999	5
ENSMUSG00000036913	0.0197003	0.982642	1.87194	0.000904863	Trim67	tripartite motif-containing 67 [Source:MGI Symbol;Acc:MGI:3045323]	124793092	124834713	3
ENSMUSG00000041351	-0.22612	0.612947	1.03604	0.000905185	Rap1gap	Rap1 GTPase-activating protein [Source:MGI Symbol;Acc:MGI:109338]	137664726	137729861	14
ENSMUSG00000019917	0.0423632	0.868305	0.520724	0.000905185	2019-09-10	septin 10 [Source:MGI Symbol;Acc:MGI:1918110]	59141627	59221847	3
ENSMUSG00000097184	0.30311	0.356564	0.853302	0.000905185	4632428C04Rik	RIKEN cDNA 4632428C04 gene [Source:MGI Symbol;Acc:MGI:1921600]	30008667	30021430	1
ENSMUSG00000001604	-0.275213	0.494397	0.983958	0.000905185	Tcea3	transcription elongation factor A (SII), 3 [Source:MGI Symbol;Acc:MGI:1196908]	136247729	136274898	3
ENSMUSG00000049606	0.209326	0.269198	0.489638	0.000905185	Zfp644	zinc finger protein 644 [Source:MGI Symbol;Acc:MGI:1277212]	106616739	106697287	18
ENSMUSG00000007659	-0.274631	0.180295	-0.540492	0.000905185	Bcl2l1	BCL2-like 1 [Source:MGI Symbol;Acc:MGI:88139]	152780668	152831728	9
ENSMUSG00000034488	0.444984	0.500487	1.62395	0.000905185	Edil3	EGF-like repeats and discoidin I-like domains 3 [Source:MGI Symbol;Acc:MGI:1329025]	88821472	89323223	8
ENSMUSG00000002032	0.0600626	0.913389	1.0838	0.000907249	Tmem25	transmembrane protein 25 [Source:MGI Symbol;Acc:MGI:1918937]	44793769	44799307	8
ENSMUSG00000085939	0.165591	0.380918	0.477652	0.000909467	Cd63-ps	CD63 antigen, pseudogene [Source:MGI Symbol;Acc:MGI:105972]	50134726	50135600	2
ENSMUSG00000034190	-0.215334	0.0829993	-0.337905	0.000912092	Chmp7	charged multivesicular body protein 7 [Source:MGI Symbol;Acc:MGI:1913922]	69717000	69732541	4
ENSMUSG00000096980	-0.329943	0.049389	-0.460496	0.000912796	Gm26526	predicted gene, 26526 [Source:MGI Symbol;Acc:MGI:5477020]	39588518	39591679	1
ENSMUSG00000020346	-0.099101	0.46453	-0.331711	0.000912922	Mgat1	mannoside acetylglucosaminyltransferase 1 [Source:MGI Symbol;Acc:MGI:96973]	49244191	49263030	13
ENSMUSG00000020151	0.276423	0.502246	0.997378	0.000913381	Ptprr	protein tyrosine phosphatase, receptor type, R [Source:MGI Symbol;Acc:MGI:109559]	116018213	116274932	7
ENSMUSG00000025656	0.242184	0.605026	1.10954	0.000915546	Arhgef9	CDC42 guanine nucleotide exchange factor (GEF) 9 [Source:MGI Symbol;Acc:MGI:2442233]	95048935	95196856	20
ENSMUSG00000037541	-0.1108	0.79711	0.909423	0.000915867	Shank2	SH3 and multiple ankyrin repeat domains 2 [Source:MGI Symbol;Acc:MGI:2671987]	144001928	144424494	6
ENSMUSG00000021767	-0.0536801	0.907286	0.890319	0.000915867	Kat6b	K(lysine) acetyltransferase 6B [Source:MGI Symbol;Acc:MGI:1858746]	21481434	21672478	14
ENSMUSG00000039115	0.0772751	0.813767	0.677099	0.000916996	Itga9	integrin alpha 9 [Source:MGI Symbol;Acc:MGI:104756]	118606690	118901003	6
ENSMUSG00000028919	0.0732157	0.897676	1.11557	0.000917607	Arhgef19	Rho guanine nucleotide exchange factor (GEF) 19 [Source:MGI Symbol;Acc:MGI:1925912]	141239499	141257564	8
ENSMUSG00000053965	0.110086	0.613909	0.505199	0.000919351	Pde5a	phosphodiesterase 5A, cGMP-specific [Source:MGI Symbol;Acc:MGI:2651499]	122728947	122859374	4
ENSMUSG00000025902	0.350333	0.453739	1.25223	0.000919351	Sox17	SRY (sex determining region Y)-box 17 [Source:MGI Symbol;Acc:MGI:107543]	4490931	4497354	8
ENSMUSG00000043300	0.360077	0.21552	0.78112	0.000920727	B3galnt1	UDP-GalNAc:betaGlcNAc beta 1,3-galactosaminyltransferase, polypeptide 1 [Source:MGI Symbol;Acc:MGI:1349405]	69574158	69598960	1
ENSMUSG00000056220	0.0903852	0.72268	0.557269	0.000922589	Pla2g4a	phospholipase A2, group IVA (cytosolic, calcium-dependent) [Source:MGI Symbol;Acc:MGI:1195256]	149829618	149961290	6
ENSMUSG00000052270	-0.405921	0.594972	-1.76773	0.000922589	Fpr2	formyl peptide receptor 2 [Source:MGI Symbol;Acc:MGI:1278319]	17887824	17893952	2
ENSMUSG00000033006	0.334835	0.535186	1.34647	0.000923349	Sox10	SRY (sex determining region Y)-box 10 [Source:MGI Symbol;Acc:MGI:98358]	79154908	79165240	4
ENSMUSG00000032322	0.386445	0.237726	-0.842813	0.000923349	Pstpip1	proline-serine-threonine phosphatase-interacting protein 1 [Source:MGI Symbol;Acc:MGI:1321396]	56089962	56128888	7
ENSMUSG00000022057	0.279113	0.450841	0.907978	0.000923534	Adamdec1	ADAM-like, decysin 1 [Source:MGI Symbol;Acc:MGI:1917650]	68563380	68582095	1
ENSMUSG00000039199	0.193437	0.431274	0.611542	0.000925794	Zdhhc1	zinc finger, DHHC domain containing 1 [Source:MGI Symbol;Acc:MGI:1918046]	105472423	105496902	4
ENSMUSG00000070802	0.13067	0.745126	0.872975	0.000926426	Pnmal2	PNMA-like 2 [Source:MGI Symbol;Acc:MGI:3645856]	16944682	16948828	1
ENSMUSG00000052957	0.440911	0.256206	1.0022	0.000926426	Gas1	growth arrest specific 1 [Source:MGI Symbol;Acc:MGI:95655]	60174405	60177365	2
ENSMUSG00000072109	0.148074	0.78967	-1.13826	0.000926426	A530040E14Rik	RIKEN cDNA A530040E14 gene [Source:MGI Symbol;Acc:MGI:3612703]	85105946	85114035	6
ENSMUSG00000040724	0.774658	0.244828	1.74002	0.00092908	Kcna2	potassium voltage-gated channel, shaker-related subfamily, member 2 [Source:MGI Symbol;Acc:MGI:96659]	107101146	107115005	3
ENSMUSG00000029185	-0.020357	0.952833	0.644441	0.00093092	Fam114a1	family with sequence similarity 114, member A1 [Source:MGI Symbol;Acc:MGI:1915553]	64970071	65041886	2
ENSMUSG00000060548	0.120024	0.886831	1.70591	0.000932149	Tnfrsf19	tumor necrosis factor receptor superfamily, member 19 [Source:MGI Symbol;Acc:MGI:1352474]	60963875	61046490	5
ENSMUSG00000021226	-0.0442495	0.931002	0.983801	0.000933715	Acot2	acyl-CoA thioesterase 2 [Source:MGI Symbol;Acc:MGI:2159605]	83987861	83993873	1
ENSMUSG00000034520	0.238012	0.594068	1.05521	0.00094385	Gjc1	gap junction protein, gamma 1 [Source:MGI Symbol;Acc:MGI:95718]	102799579	102819700	5
ENSMUSG00000049659	-0.00421896	0.982795	0.329681	0.00094385	Aftph	aftiphilin [Source:MGI Symbol;Acc:MGI:1923012]	20685084	20741589	9
ENSMUSG00000114744	1.20972	0.0657607	2.02846	0.000947199	Gm38409	predicted gene, 38409 [Source:MGI Symbol;Acc:MGI:5621294]	67476873	67502079	1
ENSMUSG00000004105	0.232465	0.567544	0.96003	0.000952558	Angptl2	angiopoietin-like 2 [Source:MGI Symbol;Acc:MGI:1347002]	33216069	33247717	4
ENSMUSG00000080268	-0.104167	0.511232	-0.380335	0.000955924	Brms1	breast cancer metastasis-suppressor 1 [Source:MGI Symbol;Acc:MGI:2388804]	5041354	5049917	5
ENSMUSG00000024713	-0.0480347	0.929262	1.02007	0.00095642	Pcsk5	proprotein convertase subtilisin/kexin type 5 [Source:MGI Symbol;Acc:MGI:97515]	17432319	17837632	5
ENSMUSG00000064215	0.267016	0.436691	0.844906	0.00095642	Ifi27	interferon, alpha-inducible protein 27 [Source:MGI Symbol;Acc:MGI:1277180]	103434211	103440239	9
ENSMUSG00000073043	-0.175378	0.707332	1.03436	0.00096288	Atoh1	atonal bHLH transcription factor 1 [Source:MGI Symbol;Acc:MGI:104654]	64729125	64731245	1
ENSMUSG00000092035	0.228604	0.688721	1.34995	0.000966181	Peg10	paternally expressed 10 [Source:MGI Symbol;Acc:MGI:2157785]	4747306	4760517	3
ENSMUSG00000067274	-0.240277	0.160246	-0.451437	0.000966818	Rplp0	ribosomal protein, large, P0 [Source:MGI Symbol;Acc:MGI:1927636]	115559467	115563727	4
ENSMUSG00000023274	-0.238669	0.577058	-1.00181	0.00097264	Cd4	CD4 antigen [Source:MGI Symbol;Acc:MGI:88335]	124864692	124888221	5
ENSMUSG00000079343	0.191104	0.444915	-0.608872	0.00097264	C1s2	complement component 1, s subcomponent 2 [Source:MGI Symbol;Acc:MGI:3644269]	124624625	124636085	2
ENSMUSG00000078810	-0.294655	0.857259	3.55877	0.000973645	Gp6	glycoprotein 6 (platelet) [Source:MGI Symbol;Acc:MGI:1889810]	4363965	4397744	2
ENSMUSG00000038402	0.0946052	0.878026	1.22506	0.000975086	Foxf2	forkhead box F2 [Source:MGI Symbol;Acc:MGI:1347479]	31625816	31631403	1
ENSMUSG00000006356	0.19225	0.535443	0.743392	0.000976276	Crip2	cysteine rich protein 2 [Source:MGI Symbol;Acc:MGI:1915587]	113140236	113145506	6
ENSMUSG00000015790	-0.0170716	0.94518	0.458941	0.000976276	Surf1	surfeit gene 1 [Source:MGI Symbol;Acc:MGI:98443]	26913381	26916530	10
ENSMUSG00000028480	0.243758	0.14587	-0.442234	0.000976276	Glipr2	GLI pathogenesis-related 2 [Source:MGI Symbol;Acc:MGI:1917770]	43957401	43979118	2
ENSMUSG00000037946	-0.25595	0.18031	-0.500794	0.000979771	Fgd3	FYVE, RhoGEF and PH domain containing 3 [Source:MGI Symbol;Acc:MGI:1353657]	49261554	49320311	3
ENSMUSG00000052752	-0.22515	0.189508	-0.448101	0.000980019	Traf7	TNF receptor-associated factor 7 [Source:MGI Symbol;Acc:MGI:3042141]	24508562	24527938	26
ENSMUSG00000022324	0.196082	0.575013	0.825327	0.000983922	Matn2	matrilin 2 [Source:MGI Symbol;Acc:MGI:109613]	34306677	34436273	6
ENSMUSG00000036292	0.174731	0.405457	0.529442	0.000983922	Gramd1c	GRAM domain containing 1C [Source:MGI Symbol;Acc:MGI:2443024]	43980350	44063345	6
ENSMUSG00000039795	0.344461	0.0488016	0.478567	0.000983922	Zfand1	zinc finger, AN1-type domain 1 [Source:MGI Symbol;Acc:MGI:1913611]	10339953	10351317	8
ENSMUSG00000027809	-0.109275	0.425971	0.338992	0.000983922	Etfdh	electron transferring flavoprotein, dehydrogenase [Source:MGI Symbol;Acc:MGI:106100]	79603788	79629500	7
ENSMUSG00000036885	-0.10181	0.671045	0.543037	0.000983922	Arhgef26	Rho guanine nucleotide exchange factor (GEF) 26 [Source:MGI Symbol;Acc:MGI:1918053]	62338344	62462221	6
ENSMUSG00000028133	0.342901	0.160967	0.660978	0.000983922	Rwdd3	RWD domain containing 3 [Source:MGI Symbol;Acc:MGI:1920420]	121155398	121171695	9
ENSMUSG00000048249	0.56576	0.133861	1.0027	0.000983922	Crebrf	CREB3 regulatory factor [Source:MGI Symbol;Acc:MGI:1924378]	26715650	26776635	6
ENSMUSG00000036606	-0.362668	0.0257114	-0.448525	0.000983922	Plxnb2	plexin B2 [Source:MGI Symbol;Acc:MGI:2154239]	89155549	89180788	8
ENSMUSG00000030534	-0.0308203	0.856002	0.351079	0.000984986	Vps33b	vacuolar protein sorting 33B [Source:MGI Symbol;Acc:MGI:2446237]	80269649	80291754	7
ENSMUSG00000031523	0.303148	0.416046	0.923513	0.000987599	Dlc1	deleted in liver cancer 1 [Source:MGI Symbol;Acc:MGI:1354949]	36567751	36953143	9
ENSMUSG00000021494	-0.156342	0.107159	-0.261296	0.000987599	Ddx41	DEAD (Asp-Glu-Ala-Asp) box polypeptide 41 [Source:MGI Symbol;Acc:MGI:1920185]	55530410	55536658	5
ENSMUSG00000014353	0.0158367	0.914707	0.282621	0.000989289	Tmem87b	transmembrane protein 87B [Source:MGI Symbol;Acc:MGI:1919727]	128818118	128854261	5
ENSMUSG00000038167	0.00771735	0.991173	1.25664	0.000990396	Plekhg6	pleckstrin homology domain containing, family G (with RhoGef domain) member 6 [Source:MGI Symbol;Acc:MGI:2682298]	125362660	125380793	1
ENSMUSG00000086607	0.531795	0.369354	1.51633	0.00099212	4930511M06Rik	RIKEN cDNA 4930511M06 gene [Source:MGI Symbol;Acc:MGI:1922334]	57373455	57552397	5
ENSMUSG00000062991	0.363034	0.373118	1.03297	0.000994132	Nrg1	neuregulin 1 [Source:MGI Symbol;Acc:MGI:96083]	31814551	32884029	18
ENSMUSG00000068479	-0.0287187	0.880843	0.377605	0.000995543	Mfap1a	microfibrillar-associated protein 1A [Source:MGI Symbol;Acc:MGI:1914782]	121491911	121506665	1
ENSMUSG00000007589	-0.0493638	0.781782	-0.371079	0.000996521	Tinf2	Terf1 (TRF1)-interacting nuclear factor 2 [Source:MGI Symbol;Acc:MGI:107246]	55674689	55681820	9
ENSMUSG00000021464	0.211139	0.558911	0.858318	0.000996715	Ror2	receptor tyrosine kinase-like orphan receptor 2 [Source:MGI Symbol;Acc:MGI:1347521]	53109312	53286124	3
ENSMUSG00000061576	-0.0913332	0.878026	1.33138	0.0010077	Dpp6	dipeptidylpeptidase 6 [Source:MGI Symbol;Acc:MGI:94921]	26817203	27727505	9
ENSMUSG00000022687	-0.0683576	0.858183	0.769366	0.00101106	Boc	biregional cell adhesion molecule-related/down-regulated by oncogenes (Cdon) binding protein [Source:MGI Symbol;Acc:MGI:2151153]	44485049	44558897	1
ENSMUSG00000020105	-0.295643	0.442465	0.943477	0.00101226	Lrig3	leucine-rich repeats and immunoglobulin-like domains 3 [Source:MGI Symbol;Acc:MGI:2443955]	125966168	126015359	7
ENSMUSG00000028032	-0.330471	0.275255	0.770116	0.001015	Papss1	3'-phosphoadenosine 5'-phosphosulfate synthase 1 [Source:MGI Symbol;Acc:MGI:1330587]	131564768	131643671	6
ENSMUSG00000033863	-0.0520061	0.883154	0.693985	0.00101718	Klf9	Kruppel-like factor 9 [Source:MGI Symbol;Acc:MGI:1333856]	23141226	23168134	2
ENSMUSG00000037405	-0.0887176	0.873444	-1.10147	0.0010177	Icam1	intercellular adhesion molecule 1 [Source:MGI Symbol;Acc:MGI:96392]	21015985	21028817	2
ENSMUSG00000024292	0.698791	0.172913	1.3402	0.0010214	Cyp4f14	cytochrome P450, family 4, subfamily f, polypeptide 14 [Source:MGI Symbol;Acc:MGI:1927669]	32905070	32917342	6
ENSMUSG00000035000	0.156009	0.611507	0.705633	0.0010214	Dpp4	dipeptidylpeptidase 4 [Source:MGI Symbol;Acc:MGI:94919]	62330073	62412231	6
ENSMUSG00000045284	0.235772	0.739908	1.69644	0.00102265	Dcaf12l1	DDB1 and CUL4 associated factor 12-like 1 [Source:MGI Symbol;Acc:MGI:2444462]	44786570	44790197	2
ENSMUSG00000022840	0.260489	0.570137	1.07553	0.00102268	Adcy5	adenylate cyclase 5 [Source:MGI Symbol;Acc:MGI:99673]	35154877	35305738	2
ENSMUSG00000021703	-0.212288	0.540651	0.822394	0.00102346	Serinc5	serine incorporator 5 [Source:MGI Symbol;Acc:MGI:2444223]	92611091	92711947	3
ENSMUSG00000021706	0.178662	0.24935	0.400594	0.00102346	Zfyve16	zinc finger, FYVE domain containing 16 [Source:MGI Symbol;Acc:MGI:2145181]	92487108	92530868	4
ENSMUSG00000051295			3.74853	0.00102346	9630028B13Rik	RIKEN cDNA 9630028B13 gene [Source:MGI Symbol;Acc:MGI:2442281]	185429357	185441819	1
ENSMUSG00000075702	0.162014	0.542848	0.63067	0.00102349	Selenom	selenoprotein M [Source:MGI Symbol;Acc:MGI:2149786]	3514684	3517351	3
ENSMUSG00000051579	0.249445	0.308452	0.619599	0.00102349	Tceal8	transcription elongation factor A (SII)-like 8 [Source:MGI Symbol;Acc:MGI:1913934]	136168984	136172342	4
ENSMUSG00000046314	0.0124239	0.968484	0.561186	0.00102444	Stxbp6	syntaxin binding protein 6 (amisyn) [Source:MGI Symbol;Acc:MGI:2384963]	44852484	45074709	6
ENSMUSG00000022419	-0.211661	0.503004	0.756023	0.00102641	Deptor	DEP domain containing MTOR-interacting protein [Source:MGI Symbol;Acc:MGI:2146322]	55112317	55259271	4
ENSMUSG00000073421	-0.121752	0.83104	-1.15283	0.00102641	H2-Ab1	histocompatibility 2, class II antigen A, beta 1 [Source:MGI Symbol;Acc:MGI:103070]	34257689	34269419	8
ENSMUSG00000016200	0.467347	0.404759	1.47554	0.00102641	Syt14	synaptotagmin XIV [Source:MGI Symbol;Acc:MGI:2444490]	192891233	193035775	5
ENSMUSG00000002732	0.642026	0.0185009	0.756178	0.0010329	Fkbp7	FK506 binding protein 7 [Source:MGI Symbol;Acc:MGI:1336879]	76663044	76673116	4
ENSMUSG00000026664	-0.0505902	0.906952	0.823048	0.00103434	Phyh	phytanoyl-CoA hydroxylase [Source:MGI Symbol;Acc:MGI:891978]	4919019	4938730	3
ENSMUSG00000056832	0.288794	0.209532	0.624088	0.00103536	Ttc26	tetratricopeptide repeat domain 26 [Source:MGI Symbol;Acc:MGI:2444853]	38381469	38427647	5
ENSMUSG00000036523	0.215421	0.656612	1.10943	0.00104316	Greb1	gene regulated by estrogen in breast cancer protein [Source:MGI Symbol;Acc:MGI:2149712]	16670615	16800886	12
ENSMUSG00000049336	0.307475	0.618062	1.4588	0.00104381	Tenm2	teneurin transmembrane protein 2 [Source:MGI Symbol;Acc:MGI:1345184]	36006656	37235964	8
ENSMUSG00000070604	0.26814	0.438655	0.881661	0.00104646	Vsig10l	V-set and immunoglobulin domain containing 10 like [Source:MGI Symbol;Acc:MGI:1922940]	43463151	43472019	5
ENSMUSG00000028645	-0.360263	0.059466	-0.51574	0.00104683	Slc2a1	solute carrier family 2 (facilitated glucose transporter), member 1 [Source:MGI Symbol;Acc:MGI:95755]	119108711	119137983	5
ENSMUSG00000064356	0.359807	0.27684	0.837549	0.00104723	mt-Atp8	mitochondrially encoded ATP synthase 8 [Source:MGI Symbol;Acc:MGI:99926]	7766	7969	1
ENSMUSG00000037736	0.480301	0.371893	1.36099	0.00104867	Limch1	LIM and calponin homology domains 1 [Source:MGI Symbol;Acc:MGI:1924819]	66745827	67057158	18
ENSMUSG00000047786	0.502192	0.226348	1.13569	0.00104867	Lix1	limb and CNS expressed 1 [Source:MGI Symbol;Acc:MGI:1913893]	17402672	17459387	2
ENSMUSG00000025347	0.0892368	0.876489	1.12684	0.00105288	Mettl7b	methyltransferase like 7B [Source:MGI Symbol;Acc:MGI:1918914]	128958274	128960988	1
ENSMUSG00000081434	-0.249673	0.280492	-0.585337	0.00105288	Gm14165	predicted gene 14165 [Source:MGI Symbol;Acc:MGI:3650537]	152353615	152354566	1
ENSMUSG00000023945	0.626859	0.26742	1.53106	0.00105288	Slc5a7	solute carrier family 5 (choline transporter), member 7 [Source:MGI Symbol;Acc:MGI:1927126]	54273590	54299034	3
ENSMUSG00000033585	0.546402	0.0614404	0.794617	0.00105575	Ndn	necdin [Source:MGI Symbol;Acc:MGI:97290]	62346569	62350262	1
ENSMUSG00000063626	0.613697	0.418117	2.18308	0.00105726	Unc5d	unc-5 netrin receptor D [Source:MGI Symbol;Acc:MGI:2389364]	28646717	29219636	5
ENSMUSG00000036067	0.122203	0.776288	-0.887022	0.00106133	Slc2a6	solute carrier family 2 (facilitated glucose transporter), member 6 [Source:MGI Symbol;Acc:MGI:2443286]	27021363	27027998	6
ENSMUSG00000038055	-0.135832	0.50631	-0.48643	0.00106585	Dexi	dexamethasone-induced transcript [Source:MGI Symbol;Acc:MGI:1926236]	10502531	10543054	3
ENSMUSG00000026764	-0.0511116	0.922369	0.991807	0.0010695	Kif5c	kinesin family member 5C [Source:MGI Symbol;Acc:MGI:1098269]	49619298	49774778	6
ENSMUSG00000019577	1.06205	0.0226763	1.28522	0.0010695	Pdk4	pyruvate dehydrogenase kinase, isoenzyme 4 [Source:MGI Symbol;Acc:MGI:1351481]	5483351	5496309	3
ENSMUSG00000027639	-0.147343	0.669012	-0.764104	0.0010695	Samhd1	SAM domain and HD domain, 1 [Source:MGI Symbol;Acc:MGI:1927468]	157097533	157135265	10
ENSMUSG00000076548	-0.245251	0.886641	-3.27754	0.00107378	Igkv4-69	immunoglobulin kappa variable 4-69 [Source:MGI Symbol;Acc:MGI:3648668]	69283794	69284319	1
ENSMUSG00000042271	0.16219	0.5778	0.68222	0.00107378	Nxt2	nuclear transport factor 2-like export factor 2 [Source:MGI Symbol;Acc:MGI:2147914]	142226770	142239692	5
ENSMUSG00000004665	-0.0913521	0.770731	-0.65158	0.0010748	Cnn2	calponin 2 [Source:MGI Symbol;Acc:MGI:105093]	79988584	79996062	2
ENSMUSG00000067276	0.0377909	0.957966	1.37688	0.0010748	Capn6	calpain 6 [Source:MGI Symbol;Acc:MGI:1100850]	143802231	143827414	2
ENSMUSG00000059248	-0.311717	0.0625281	-0.449806	0.0010762	2019-09-09	septin 9 [Source:MGI Symbol;Acc:MGI:1858222]	117199661	117362325	10
ENSMUSG00000027015	0.0767268	0.899869	1.19846	0.00109542	Cybrd1	cytochrome b reductase 1 [Source:MGI Symbol;Acc:MGI:2654575]	71117923	71142926	1
ENSMUSG00000029166	0.371343	0.149371	0.679526	0.00109649	Mapre3	microtubule-associated protein, RP/EB family, member 3 [Source:MGI Symbol;Acc:MGI:2140967]	30814641	30866106	6
ENSMUSG00000032387	0.393491	0.298625	0.954266	0.00109926	Rbpms2	RNA binding protein with multiple splicing 2 [Source:MGI Symbol;Acc:MGI:1919223]	65629648	65660528	6
ENSMUSG00000031884	0.422534	0.237853	0.915051	0.00110149	Ces2d-ps	carboxylesterase 2D, pseudogene [Source:MGI Symbol;Acc:MGI:3704319]	104867488	104873861	1
ENSMUSG00000048222	-0.0356636	0.868305	0.427578	0.00110449	Mfap1b	microfibrillar-associated protein 1B [Source:MGI Symbol;Acc:MGI:3694697]	121460235	121474067	1
ENSMUSG00000047904	0.194051	0.781518	1.59837	0.00110459	Sstr2	somatostatin receptor 2 [Source:MGI Symbol;Acc:MGI:98328]	113619342	113626028	3
ENSMUSG00000024039	-0.726432	0.0702347	1.07607	0.00110613	Cbs	cystathionine beta-synthase [Source:MGI Symbol;Acc:MGI:88285]	31608894	31637238	12
ENSMUSG00000036931	0.313629	0.202644	-0.627486	0.00110613	Nfkbid	nuclear factor of kappa light polypeptide gene enhancer in B cells inhibitor, delta [Source:MGI Symbol;Acc:MGI:3041243]	30421732	30428746	4
ENSMUSG00000036046	-0.228335	0.049389	-0.313756	0.00110613	5031439G07Rik	RIKEN cDNA 5031439G07 gene [Source:MGI Symbol;Acc:MGI:2444899]	84943936	84988551	4
ENSMUSG00000052131	1.11676	0.301309	2.76097	0.0011066	Akr1b7	aldo-keto reductase family 1, member B7 [Source:MGI Symbol;Acc:MGI:101918]	34412334	34423142	1
ENSMUSG00000020883	0.167378	0.485874	0.573407	0.00110991	Fbxl20	F-box and leucine-rich repeat protein 20 [Source:MGI Symbol;Acc:MGI:1919444]	98082556	98150403	7
ENSMUSG00000026825	0.204044	0.618488	0.941445	0.00111279	Dnm1	dynamin 1 [Source:MGI Symbol;Acc:MGI:107384]	32308471	32353338	17
ENSMUSG00000021687	-0.0737151	0.830772	0.693354	0.00111588	Scamp1	secretory carrier membrane protein 1 [Source:MGI Symbol;Acc:MGI:1349480]	94201310	94285857	4
ENSMUSG00000034457	0.245054	0.560502	1.02097	0.00111588	Eda2r	ectodysplasin A2 receptor [Source:MGI Symbol;Acc:MGI:2442860]	97333840	97377216	4
ENSMUSG00000048782	0.170711	0.745816	1.14746	0.00111893	Insc	INSC spindle orientation adaptor protein [Source:MGI Symbol;Acc:MGI:1917942]	114743694	114850383	9
ENSMUSG00000042501	0.65754	0.16528	1.30135	0.00111893	Cpa6	carboxypeptidase A6 [Source:MGI Symbol;Acc:MGI:3045348]	10324720	10719945	4
ENSMUSG00000048537	-0.193316	0.571309	0.7941	0.00111937	Phldb1	pleckstrin homology like domain, family B, member 1 [Source:MGI Symbol;Acc:MGI:2143230]	44686304	44735198	18
ENSMUSG00000018927	0.397837	0.197559	0.794015	0.00111937	Ccl6	chemokine (C-C motif) ligand 6 [Source:MGI Symbol;Acc:MGI:98263]	83587882	83593087	3
ENSMUSG00000036634	-0.77267	0.158006	-1.41343	0.00112316	Mag	myelin-associated glycoprotein [Source:MGI Symbol;Acc:MGI:96912]	30899176	30914873	8
ENSMUSG00000025701	0.225563	0.62951	1.09888	0.00112645	Alox5	arachidonate 5-lipoxygenase [Source:MGI Symbol;Acc:MGI:87999]	116410077	116461178	8
ENSMUSG00000018920	0.217795	0.595968	-0.938885	0.00112946	Cxcl16	chemokine (C-X-C motif) ligand 16 [Source:MGI Symbol;Acc:MGI:1932682]	70453983	70459984	3
ENSMUSG00000037730	0.0476256	0.783304	0.36288	0.00114496	Mynn	myoneurin [Source:MGI Symbol;Acc:MGI:1931415]	30602065	30619873	6
ENSMUSG00000040407	-0.0663785	0.79847	0.532611	0.00114496	Akap9	A kinase (PRKA) anchor protein (yotiao) 9 [Source:MGI Symbol;Acc:MGI:2178217]	3928054	4081310	15
ENSMUSG00000054708	0.330274	0.221173	0.696592	0.00114565	Ankrd24	ankyrin repeat domain 24 [Source:MGI Symbol;Acc:MGI:1890394]	81628540	81647610	14
ENSMUSG00000030353	-0.770357	0.0483767	-1.04812	0.00114565	Tead4	TEA domain family member 4 [Source:MGI Symbol;Acc:MGI:106907]	128224288	128300823	5
ENSMUSG00000056758	-0.131461	0.774376	0.961266	0.00114565	Hmga2	high mobility group AT-hook 2 [Source:MGI Symbol;Acc:MGI:101761]	120361275	120476469	3
ENSMUSG00000023277	-0.0160165	0.945479	-0.430905	0.00114565	Twf2	twinfilin actin binding protein 2 [Source:MGI Symbol;Acc:MGI:1346078]	106203108	106215389	9
ENSMUSG00000021476	0.182757	0.258935	0.413536	0.00114688	Habp4	hyaluronic acid binding protein 4 [Source:MGI Symbol;Acc:MGI:1891713]	64161824	64186537	6
ENSMUSG00000003477	0.893782	0.494653	3.14698	0.00114774	Inmt	indolethylamine N-methyltransferase [Source:MGI Symbol;Acc:MGI:102963]	55170626	55175043	2
ENSMUSG00000041347	0.00493122	0.995574	-1.30093	0.0011485	Bdkrb1	bradykinin receptor, beta 1 [Source:MGI Symbol;Acc:MGI:88144]	105603085	105605428	3
ENSMUSG00000041731	0.194304	0.624615	0.896423	0.00115172	Pgm5	phosphoglucomutase 5 [Source:MGI Symbol;Acc:MGI:1925668]	24683016	24861855	4
ENSMUSG00000052117	-0.689716	0.180683	1.33401	0.00115212	D630039A03Rik	RIKEN cDNA D630039A03 gene [Source:MGI Symbol;Acc:MGI:2442889]	57908483	57916297	1
ENSMUSG00000049176	0.635891	0.313094	1.85447	0.00115703	Frmpd4	FERM and PDZ domain containing 4 [Source:MGI Symbol;Acc:MGI:3042378]	167471309	168577231	4
ENSMUSG00000091455			3.98699	0.00115707	Otogl	otogelin-like [Source:MGI Symbol;Acc:MGI:3647600]	107760531	107912134	1
ENSMUSG00000089804	-0.0481065	0.922546	0.950672	0.00115731	Gm16136	predicted gene 16136 [Source:MGI Symbol;Acc:MGI:3802137]	37231793	37233309	3
ENSMUSG00000021091	-0.054113	0.917067	-0.968138	0.00116089	Serpina3n	serine (or cysteine) peptidase inhibitor, clade A, member 3N [Source:MGI Symbol;Acc:MGI:105045]	104406729	104414329	1
ENSMUSG00000024308	-0.237615	0.472094	-0.787656	0.00116136	Tapbp	TAP binding protein [Source:MGI Symbol;Acc:MGI:1201689]	33915899	33929292	9
ENSMUSG00000031608	-0.0442931	0.873704	0.545646	0.00116208	Galnt7	polypeptide N-acetylgalactosaminyltransferase 7 [Source:MGI Symbol;Acc:MGI:1349449]	57523828	57653032	4
ENSMUSG00000004846	-0.329045	0.169249	-0.619667	0.00116208	Plod3	procollagen-lysine, 2-oxoglutarate 5-dioxygenase 3 [Source:MGI Symbol;Acc:MGI:1347008]	136987019	136996648	6
ENSMUSG00000112489	0.255144	0.360052	0.720403	0.00116208	9230116L04Rik	RIKEN cDNA 9230116L04 gene [Source:MGI Symbol;Acc:MGI:2447826]	79088705	79103939	3
ENSMUSG00000021335	0.554562	0.340364	1.50811	0.00116208	Slc17a1	solute carrier family 17 (sodium phosphate), member 1 [Source:MGI Symbol;Acc:MGI:103209]	23867750	23895730	4
ENSMUSG00000028017	-0.29026	0.658448	1.49401	0.00116339	Egf	epidermal growth factor [Source:MGI Symbol;Acc:MGI:95290]	129677565	129755316	9
ENSMUSG00000032324	-0.0642634	0.827021	0.590344	0.00117165	Tspan3	tetraspanin 3 [Source:MGI Symbol;Acc:MGI:1928098]	56131725	56165477	5
ENSMUSG00000046618	-0.323805	0.67378	1.84655	0.00117165	Olfml2a	olfactomedin-like 2A [Source:MGI Symbol;Acc:MGI:2444741]	38931978	38963753	1
ENSMUSG00000116180	0.430901	0.30965	1.17215	0.00117344	Gm49492	predicted gene, 49492 [Source:MGI Symbol;Acc:MGI:6155169]	100600204	100602766	1
ENSMUSG00000032572	-0.0399365	0.965324	1.65312	0.00117774	Col6a4	collagen, type VI, alpha 4 [Source:MGI Symbol;Acc:MGI:1915803]	105989454	106096783	4
ENSMUSG00000035226	-1.03911	0.232408	2.2713	0.00117774	Rims4	regulating synaptic membrane exocytosis 4 [Source:MGI Symbol;Acc:MGI:2674366]	163859751	163918683	1
ENSMUSG00000028278	0.353267	0.419814	1.09791	0.00117774	Rragd	Ras-related GTP binding D [Source:MGI Symbol;Acc:MGI:1098604]	32983037	33022180	4
ENSMUSG00000031328	0.204983	0.538121	0.77876	0.00117816	Flna	filamin, alpha [Source:MGI Symbol;Acc:MGI:95556]	74223461	74249820	15
ENSMUSG00000031938	0.384469	0.0760631	0.57596	0.00117816	4931406C07Rik	RIKEN cDNA 4931406C07 gene [Source:MGI Symbol;Acc:MGI:1918234]	15283337	15306448	9
ENSMUSG00000057440	0.0986465	0.619428	0.454343	0.00118068	Mpp7	membrane protein, palmitoylated 7 (MAGUK p55 subfamily member 7) [Source:MGI Symbol;Acc:MGI:1922989]	7347959	7626866	14
ENSMUSG00000032508	-0.291242	0.141109	-0.51593	0.00118215	Myd88	myeloid differentiation primary response gene 88 [Source:MGI Symbol;Acc:MGI:108005]	119335934	119341411	3
ENSMUSG00000086555	0.6065	0.352777	1.68787	0.00118416	Gm13446	predicted gene 13446 [Source:MGI Symbol;Acc:MGI:3649869]	35549538	35558702	2
ENSMUSG00000022089	-0.133612	0.260449	-0.299925	0.00118416	Bin3	bridging integrator 3 [Source:MGI Symbol;Acc:MGI:1929883]	70100105	70138206	5
ENSMUSG00000042851	0.402514	0.305683	0.996104	0.00118416	Zc3h6	zinc finger CCCH type containing 6 [Source:MGI Symbol;Acc:MGI:1926001]	128967402	129018563	2
ENSMUSG00000042284	0.132511	0.624615	0.610015	0.00118416	Itga1	integrin alpha 1 [Source:MGI Symbol;Acc:MGI:96599]	114953096	115101964	6
ENSMUSG00000011832	-0.199039	0.309463	-0.48718	0.00118528	Evi5l	ecotropic viral integration site 5 like [Source:MGI Symbol;Acc:MGI:2442167]	4166567	4211257	14
ENSMUSG00000003308	-0.336993	0.0778777	-0.507381	0.00119204	Keap1	kelch-like ECH-associated protein 1 [Source:MGI Symbol;Acc:MGI:1858732]	21229730	21239361	6
ENSMUSG00000003037	-0.176498	0.162354	-0.326733	0.00119529	Rab8a	RAB8A, member RAS oncogene family [Source:MGI Symbol;Acc:MGI:96960]	72161200	72183904	3
ENSMUSG00000038268	-0.128586	0.3707	-0.352863	0.00119912	Ovca2	candidate tumor suppressor in ovarian cancer 2 [Source:MGI Symbol;Acc:MGI:2179725]	75175942	75178835	2
ENSMUSG00000049154			5.80463	0.00119912	Fam183b	family with sequence similarity 183, member B [Source:MGI Symbol;Acc:MGI:1922679]	58792797	58801960	2
ENSMUSG00000021540	0.080729	0.621483	0.370257	0.00119992	Smad5	SMAD family member 5 [Source:MGI Symbol;Acc:MGI:1328787]	56703010	56742377	6
ENSMUSG00000042050	0.112502	0.489622	0.397281	0.00120164	Wdr60	WD repeat domain 60 [Source:MGI Symbol;Acc:MGI:2445085]	116206262	116263022	8
ENSMUSG00000020173	-0.199833	0.671045	1.0365	0.00120504	Cobl	cordon-bleu WH2 repeat [Source:MGI Symbol;Acc:MGI:105056]	12236608	12464960	10
ENSMUSG00000015224	0.308964	0.485553	1.08592	0.00120683	Cyp2j9	cytochrome P450, family 2, subfamily j, polypeptide 9 [Source:MGI Symbol;Acc:MGI:1921769]	96568429	96591578	2
ENSMUSG00000068742	0.250966	0.56589	1.01266	0.00121331	Cry2	cryptochrome 2 (photolyase-like) [Source:MGI Symbol;Acc:MGI:1270859]	92403646	92434043	4
ENSMUSG00000031461	0.806363	0.678169	4.73567	0.00121421	Myom2	myomesin 2 [Source:MGI Symbol;Acc:MGI:1328358]	15057653	15133541	5
ENSMUSG00000104310	0.336407	0.382895	0.980936	0.00121421	Gm4081	predicted gene 4081 [Source:MGI Symbol;Acc:MGI:3782256]	56976803	56978640	1
ENSMUSG00000039706	0.390294	0.275181	0.91306	0.00121706	Ldb2	LIM domain binding 2 [Source:MGI Symbol;Acc:MGI:894670]	44472132	44799680	7
ENSMUSG00000028980	-0.0626476	0.793043	-0.486194	0.00121794	H6pd	hexose-6-phosphate dehydrogenase (glucose 1-dehydrogenase) [Source:MGI Symbol;Acc:MGI:2140356]	149979475	150009023	4
ENSMUSG00000028618	-0.0260922	0.926204	0.520565	0.00121841	Tmem59	transmembrane protein 59 [Source:MGI Symbol;Acc:MGI:1929278]	107178399	107200996	6
ENSMUSG00000054723	-0.0918178	0.76005	0.630026	0.00122231	Vmac	vimentin-type intermediate filament associated coiled-coil protein [Source:MGI Symbol;Acc:MGI:2146912]	56713936	56718022	4
ENSMUSG00000040797	0.097077	0.905964	1.65292	0.00122351	Iqsec3	IQ motif and Sec7 domain 3 [Source:MGI Symbol;Acc:MGI:2677208]	121372933	121473678	4
ENSMUSG00000032294	-0.218746	0.457329	-0.70232	0.00122351	Pkm	pyruvate kinase, muscle [Source:MGI Symbol;Acc:MGI:97591]	59656368	59679375	11
ENSMUSG00000046546	-0.101156	0.827148	-0.925024	0.00122486	Fam43a	family with sequence similarity 43, member A [Source:MGI Symbol;Acc:MGI:2676309]	30599723	30602797	1
ENSMUSG00000018008	0.313043	0.272047	-0.710159	0.00122486	Cyth4	cytohesin 4 [Source:MGI Symbol;Acc:MGI:2441702]	78597047	78622019	13
ENSMUSG00000031285	0.317705	0.781156	2.56699	0.00122817	Dcx	doublecortin [Source:MGI Symbol;Acc:MGI:1277171]	143855842	143933311	6
ENSMUSG00000110597	0.432344	0.209532	0.880716	0.00123266	Gm8798	predicted gene 8798 [Source:MGI Symbol;Acc:MGI:3646429]	104886862	104902787	2
ENSMUSG00000030509	-0.0892773	0.620731	0.411505	0.00123335	Asb7	ankyrin repeat and SOCS box-containing 7 [Source:MGI Symbol;Acc:MGI:2152835]	66644565	66689596	6
ENSMUSG00000022218	-0.0249874	0.97181	-1.21186	0.00123335	Tgm1	transglutaminase 1, K polypeptide [Source:MGI Symbol;Acc:MGI:98730]	55700009	55713926	6
ENSMUSG00000046329	0.0873991	0.86338	0.99972	0.0012348	Slc25a23	solute carrier family 25 (mitochondrial carrier; phosphate carrier), member 23 [Source:MGI Symbol;Acc:MGI:1914222]	57043711	57059863	6
ENSMUSG00000014867	-0.234344	0.225187	-0.48968	0.00123837	Surf4	surfeit gene 4 [Source:MGI Symbol;Acc:MGI:98445]	26920040	26933928	3
ENSMUSG00000022463	-0.362339	0.112029	-0.59714	0.00123837	Srebf2	sterol regulatory element binding factor 2 [Source:MGI Symbol;Acc:MGI:107585]	82147181	82205379	7
ENSMUSG00000070031	-0.0248653	0.962532	-0.950846	0.00124529	Sp140	Sp140 nuclear body protein [Source:MGI Symbol;Acc:MGI:3702467]	85600378	85645037	6
ENSMUSG00000033949	-0.0348126	0.898153	0.521929	0.0012453	Trim36	tripartite motif-containing 36 [Source:MGI Symbol;Acc:MGI:106264]	46165300	46212607	3
ENSMUSG00000027803	0.43378	0.102468	0.700596	0.00124667	Wwtr1	WW domain containing transcription regulator 1 [Source:MGI Symbol;Acc:MGI:1917649]	57455649	57575910	2
ENSMUSG00000029621	-0.129242	0.428751	-0.392732	0.00124821	Arpc1a	actin related protein 2/3 complex, subunit 1A [Source:MGI Symbol;Acc:MGI:1928896]	145083830	145108761	6
ENSMUSG00000022865	-0.0392554	0.907315	0.631162	0.00125339	Cxadr	coxsackie virus and adenovirus receptor [Source:MGI Symbol;Acc:MGI:1201679]	78301489	78359774	6
ENSMUSG00000019970	0.501241	0.367601	1.35743	0.00125339	Sgk1	serum/glucocorticoid regulated kinase 1 [Source:MGI Symbol;Acc:MGI:1340062]	21882184	21999903	13
ENSMUSG00000053318	-0.0172205	0.976321	-0.979152	0.00125339	Slamf8	SLAM family member 8 [Source:MGI Symbol;Acc:MGI:1921998]	172581758	172590568	2
ENSMUSG00000042942	0.422522	0.39053	1.22101	0.00125339	Greb1l	growth regulation by estrogen in breast cancer-like [Source:MGI Symbol;Acc:MGI:3576497]	10325177	10562940	7
ENSMUSG00000031028	0.389724	0.282534	0.960291	0.0012555	Tub	tubby bipartite transcription factor [Source:MGI Symbol;Acc:MGI:2651573]	108950338	109034460	5
ENSMUSG00000024558	0.20529	0.705946	1.23286	0.0012555	Mapk4	mitogen-activated protein kinase 4 [Source:MGI Symbol;Acc:MGI:2444559]	73928486	74065359	4
ENSMUSG00000039621	0.144513	0.603842	-0.627257	0.00125652	Prex1	phosphatidylinositol-3,4,5-trisphosphate-dependent Rac exchange factor 1 [Source:MGI Symbol;Acc:MGI:3040696]	166566342	166713832	8
ENSMUSG00000011752	-0.357242	0.176324	-0.677312	0.00125652	Pgam1	phosphoglycerate mutase 1 [Source:MGI Symbol;Acc:MGI:97552]	41911923	41918660	3
ENSMUSG00000074238	-0.214822	0.174723	0.407984	0.00125727	Ap1ar	adaptor-related protein complex 1 associated regulatory protein [Source:MGI Symbol;Acc:MGI:2384822]	127807007	127837523	10
ENSMUSG00000042644	-0.23204	0.124506	-0.392949	0.00125769	Itpr3	inositol 1,4,5-triphosphate receptor 3 [Source:MGI Symbol;Acc:MGI:96624]	27057304	27122223	2
ENSMUSG00000022122	0.322555	0.514639	1.16544	0.0012626	Ednrb	endothelin receptor type B [Source:MGI Symbol;Acc:MGI:102720]	103814625	103844402	3
ENSMUSG00000047250	0.214364	0.508818	0.762921	0.00126334	Ptgs1	prostaglandin-endoperoxide synthase 1 [Source:MGI Symbol;Acc:MGI:97797]	36230426	36252272	5
ENSMUSG00000027109	0.168729	0.518472	0.611271	0.00126597	Sp3	trans-acting transcription factor 3 [Source:MGI Symbol;Acc:MGI:1277166]	72936427	72980446	5
ENSMUSG00000039063	-0.216081	0.660548	1.11094	0.00126888	Echdc3	enoyl Coenzyme A hydratase domain containing 3 [Source:MGI Symbol;Acc:MGI:1915106]	6188465	6213033	3
ENSMUSG00000041777	0.189352	0.412385	0.561492	0.00126938	Cir1	corepressor interacting with RBPJ, 1 [Source:MGI Symbol;Acc:MGI:1914185]	73283105	73312701	2
ENSMUSG00000027624	-0.182466	0.650393	0.892658	0.00127336	Epb41l1	erythrocyte membrane protein band 4.1 like 1 [Source:MGI Symbol;Acc:MGI:103010]	156420909	156543214	9
ENSMUSG00000030555	-0.00435044	0.986485	0.457043	0.00128182	Ttc23	tetratricopeptide repeat domain 23 [Source:MGI Symbol;Acc:MGI:1914259]	67647410	67762912	14
ENSMUSG00000006611	0.24118	0.30486	0.590287	0.00128274	Hfe	hemochromatosis [Source:MGI Symbol;Acc:MGI:109191]	23702034	23710854	4
ENSMUSG00000021322	0.103739	0.829116	-0.938133	0.00128496	Aoah	acyloxyacyl hydrolase [Source:MGI Symbol;Acc:MGI:1350928]	20794113	21036617	4
ENSMUSG00000026473	-0.341563	0.278006	0.782864	0.00128665	Glul	glutamate-ammonia ligase (glutamine synthetase) [Source:MGI Symbol;Acc:MGI:95739]	153899944	153909723	5
ENSMUSG00000038587	0.247573	0.463334	0.806743	0.0012878	Akap12	A kinase (PRKA) anchor protein (gravin) 12 [Source:MGI Symbol;Acc:MGI:1932576]	4266380	4359470	3
ENSMUSG00000034235	0.0505043	0.888625	0.699574	0.00128875	Usp54	ubiquitin specific peptidase 54 [Source:MGI Symbol;Acc:MGI:1926037]	20548912	20641063	5
ENSMUSG00000040570	-0.203163	0.632743	0.955239	0.00130305	Rundc3b	RUN domain containing 3B [Source:MGI Symbol;Acc:MGI:2685286]	8490334	8622952	2
ENSMUSG00000027581	0.512761	0.321239	1.28444	0.00130813	Stmn3	stathmin-like 3 [Source:MGI Symbol;Acc:MGI:1277137]	181306459	181314500	1
ENSMUSG00000040841	0.466198	0.204061	0.93499	0.00130868	Six5	sine oculis-related homeobox 5 [Source:MGI Symbol;Acc:MGI:106220]	19094594	19098549	1
ENSMUSG00000025969	-0.0243196	0.951864	0.733478	0.00130868	Nrp2	neuropilin 2 [Source:MGI Symbol;Acc:MGI:1100492]	62703285	62818695	7
ENSMUSG00000004446	-0.147676	0.667496	-0.749369	0.00130868	Bid	BH3 interacting domain death agonist [Source:MGI Symbol;Acc:MGI:108093]	120891930	120916853	5
ENSMUSG00000021796	0.0641129	0.714713	0.374727	0.00130944	Bmpr1a	bone morphogenetic protein receptor, type 1A [Source:MGI Symbol;Acc:MGI:1338938]	34410734	34503341	4
ENSMUSG00000031442	-0.11296	0.484504	0.380746	0.00130989	Mcf2l	mcf.2 transforming sequence-like [Source:MGI Symbol;Acc:MGI:103263]	12873806	13020905	22
ENSMUSG00000057666	-0.335144	0.270543	-0.755119	0.0013178	Gapdh	glyceraldehyde-3-phosphate dehydrogenase [Source:MGI Symbol;Acc:MGI:95640]	125161715	125166467	13
ENSMUSG00000046204			2.50937	0.00132312	Pnma2	paraneoplastic antigen MA2 [Source:MGI Symbol;Acc:MGI:2444129]	66911170	66921023	4
ENSMUSG00000063524	-0.338295	0.302197	-0.808882	0.00133054	Eno1	enolase 1, alpha non-neuron [Source:MGI Symbol;Acc:MGI:95393]	150236721	150248879	11
ENSMUSG00000060181	-0.257411	0.587834	1.0881	0.00133264	Slc35e3	solute carrier family 35, member E3 [Source:MGI Symbol;Acc:MGI:2448489]	117733679	117746365	2
ENSMUSG00000039763	0.0660482	0.907152	1.06822	0.00133264	Dnajc28	DnaJ heat shock protein family (Hsp40) member C28 [Source:MGI Symbol;Acc:MGI:2181053]	91614254	91619026	4
ENSMUSG00000031885	-0.0831245	0.377964	-0.229789	0.00133408	Cbfb	core binding factor beta [Source:MGI Symbol;Acc:MGI:99851]	105170674	105217989	7
ENSMUSG00000048402	0.206924	0.657951	1.04851	0.00134052	Gli2	GLI-Kruppel family member GLI2 [Source:MGI Symbol;Acc:MGI:95728]	118834132	119053619	9
ENSMUSG00000045672	0.442816	0.333811	1.12216	0.0013431	Col27a1	collagen, type XXVII, alpha 1 [Source:MGI Symbol;Acc:MGI:2672118]	63214004	63334991	7
ENSMUSG00000010086	0.0444675	0.963775	1.93183	0.00134479	Rnf112	ring finger protein 112 [Source:MGI Symbol;Acc:MGI:106611]	61448442	61454131	7
ENSMUSG00000049109	0.194449	0.759864	-1.29535	0.00134479	Themis	thymocyte selection associated [Source:MGI Symbol;Acc:MGI:2443552]	28668360	28883818	8
ENSMUSG00000086670			1.83485	0.00134822	Gm13194	predicted gene 13194 [Source:MGI Symbol;Acc:MGI:3651272]	4942174	4942484	1
ENSMUSG00000006457			5.04765	0.00134822	Actn3	actinin alpha 3 [Source:MGI Symbol;Acc:MGI:99678]	4861216	4877909	2
ENSMUSG00000024268	-0.0576043	0.913389	1.01603	0.00134826	Celf4	CUGBP, Elav-like family member 4 [Source:MGI Symbol;Acc:MGI:1932407]	25477632	25754157	10
ENSMUSG00000097558			2.16851	0.00134966	Gm26902	predicted gene, 26902 [Source:MGI Symbol;Acc:MGI:5477396]	34474808	34481546	2
ENSMUSG00000021013	0.265612	0.387947	0.76874	0.00134977	Ttc8	tetratricopeptide repeat domain 8 [Source:MGI Symbol;Acc:MGI:1923510]	98920574	98983238	9
ENSMUSG00000009905	-0.0673492	0.793722	0.523822	0.00135069	Kdsr	3-ketodihydrosphingosine reductase [Source:MGI Symbol;Acc:MGI:1918000]	106720459	106759727	3
ENSMUSG00000031144	0.0529472	0.887892	0.733771	0.00135164	Syp	synaptophysin [Source:MGI Symbol;Acc:MGI:98467]	7638471	7653256	6
ENSMUSG00000022019	0.136352	0.554975	0.533367	0.00135364	Tdrd3	tudor domain containing 3 [Source:MGI Symbol;Acc:MGI:2444023]	87416639	87545504	6
ENSMUSG00000021709	0.146518	0.459166	0.468286	0.00135364	Erbin	Erbb2 interacting protein [Source:MGI Symbol;Acc:MGI:1890169]	103818787	103920514	7
ENSMUSG00000005951	-0.205251	0.457651	0.663801	0.0013559	Shpk	sedoheptulokinase [Source:MGI Symbol;Acc:MGI:1921887]	73199460	73224511	2
ENSMUSG00000020132	-0.217422	0.0201103	-0.251592	0.00135696	Rab21	RAB21, member RAS oncogene family [Source:MGI Symbol;Acc:MGI:894308]	115287084	115315594	2
ENSMUSG00000025892	0.112767	0.876611	1.53839	0.00135844	Gria4	glutamate receptor, ionotropic, AMPA4 (alpha 4) [Source:MGI Symbol;Acc:MGI:95811]	4417896	4796234	4
ENSMUSG00000037971	0.198451	0.521336	0.723192	0.00136038	1110032A03Rik	RIKEN cDNA 1110032A03 gene [Source:MGI Symbol;Acc:MGI:1915971]	50762828	50775520	9
ENSMUSG00000032870	-0.405838	0.01741	-0.458226	0.00136166	Smap2	small ArfGAP 2 [Source:MGI Symbol;Acc:MGI:1917030]	120968317	121017247	2
ENSMUSG00000035004	0.0310867	0.949061	-0.872978	0.00136166	Igsf6	immunoglobulin superfamily, member 6 [Source:MGI Symbol;Acc:MGI:1891393]	121064067	121074572	1
ENSMUSG00000071691			2.93656	0.00136191	Gm960	predicted gene 960 [Source:MGI Symbol;Acc:MGI:2685806]	4625734	4698668	5
ENSMUSG00000043484	0.344102	0.0975177	0.574515	0.00136603	Gm5867	predicted gene 5867 [Source:MGI Symbol;Acc:MGI:3644922]	69461152	69461743	1
ENSMUSG00000039126	0.134681	0.693726	0.744423	0.00136603	Prune2	prune homolog 2 [Source:MGI Symbol;Acc:MGI:1925004]	16956118	17223932	9
ENSMUSG00000049804	0.15814	0.659975	0.804427	0.00136603	Armcx4	armadillo repeat containing, X-linked 4 [Source:MGI Symbol;Acc:MGI:2147887]	134686519	134696757	1
ENSMUSG00000034761	0.0513209	0.867521	0.59814	0.0013696	Map4k5	mitogen-activated protein kinase kinase kinase kinase 5 [Source:MGI Symbol;Acc:MGI:1925503]	69803750	69893200	10
ENSMUSG00000024500	0.673953	0.29891	1.68449	0.0013696	Ppp2r2b	protein phosphatase 2, regulatory subunit B, beta [Source:MGI Symbol;Acc:MGI:1920180]	42637432	43059471	7
ENSMUSG00000028172			3.64597	0.00137195	Tacr3	tachykinin receptor 3 [Source:MGI Symbol;Acc:MGI:892968]	134829007	134934579	1
ENSMUSG00000051839	0.590051	0.761815	4.35381	0.00137435	Gypa	glycophorin A [Source:MGI Symbol;Acc:MGI:95880]	80493781	80510542	1
ENSMUSG00000021318	0.16105	0.66816	0.835705	0.00138777	Gli3	GLI-Kruppel family member GLI3 [Source:MGI Symbol;Acc:MGI:95729]	15463235	15730026	4
ENSMUSG00000037166	0.194696	0.668501	0.988076	0.00138837	Ppp1r14a	protein phosphatase 1, regulatory inhibitor subunit 14A [Source:MGI Symbol;Acc:MGI:1931139]	29289308	29293801	2
ENSMUSG00000110803	0.339437	0.384611	0.984823	0.00140553	Gm20275	predicted gene, 20275 [Source:MGI Symbol;Acc:MGI:5012460]	59826257	59941077	1
ENSMUSG00000043346	-0.167863	0.433878	0.548787	0.00140553	Gm6741	predicted gene 6741 [Source:MGI Symbol;Acc:MGI:3643504]	91236811	91237557	1
ENSMUSG00000089714	-0.168211	0.664317	-0.832642	0.00140553	Gm16092	predicted gene 16092 [Source:MGI Symbol;Acc:MGI:3841241]	85511133	85527161	1
ENSMUSG00000045503	-0.111661	0.674317	-0.575432	0.00140553	Sys1	SYS1 Golgi-localized integral membrane protein homolog (S. cerevisiae) [Source:MGI Symbol;Acc:MGI:1913710]	164456964	164479638	7
ENSMUSG00000089809	-0.14839	0.732474	0.907493	0.00140553	Rasgef1b	RasGEF domain family, member 1B [Source:MGI Symbol;Acc:MGI:2443755]	99217426	99729065	10
ENSMUSG00000059456	-0.014508	0.960668	-0.521045	0.00140553	Ptk2b	PTK2 protein tyrosine kinase 2 beta [Source:MGI Symbol;Acc:MGI:104908]	66153257	66281052	8
ENSMUSG00000020155	0.146668	0.683038	0.781811	0.00140553	Kcnmb1	potassium large conductance calcium-activated channel, subfamily M, beta member 1 [Source:MGI Symbol;Acc:MGI:1334203]	33963013	33973641	1
ENSMUSG00000111089	-0.447588	0.770958	3.41705	0.00140563	Gm49427	predicted gene, 49427 [Source:MGI Symbol;Acc:MGI:6155063]	120009805	120011448	1
ENSMUSG00000070866	0.420193	0.613045	2.3096	0.00140591	Zfp804a	zinc finger protein 804A [Source:MGI Symbol;Acc:MGI:2442949]	82053222	82259879	2
ENSMUSG00000063713	0.460412	0.28452	1.10387	0.00141293	Klk1b24	kallikrein 1-related peptidase b24 [Source:MGI Symbol;Acc:MGI:892021]	44188236	44192455	1
ENSMUSG00000087598	-0.0600034	0.77919	0.445712	0.00141293	Zfp111	zinc finger protein 111 [Source:MGI Symbol;Acc:MGI:1929114]	24193947	24211443	6
ENSMUSG00000009030	0.131185	0.271151	0.296701	0.00141293	Pdcl	phosducin-like [Source:MGI Symbol;Acc:MGI:1914716]	37350074	37359332	4
ENSMUSG00000036242	0.446745	0.301309	1.08125	0.00141393	Armh4	armadillo-like helical domain containing 4 [Source:MGI Symbol;Acc:MGI:1914669]	49675952	49783383	3
ENSMUSG00000019945	-0.395159	0.537873	1.56309	0.00141583	Cabcoco1	ciliary associated calcium binding coiled-coil 1 [Source:MGI Symbol;Acc:MGI:1920537]	68430953	68541896	2
ENSMUSG00000005667	-0.539762	0.179365	-1.01927	0.00141666	Mthfd2	methylenetetrahydrofolate dehydrogenase (NAD+ dependent), methenyltetrahydrofolate cyclohydrolase [Source:MGI Symbol;Acc:MGI:1338850]	83305691	83325908	7
ENSMUSG00000097482			2.48905	0.00141666	Gm17634	predicted gene, 17634 [Source:MGI Symbol;Acc:MGI:4937268]	105356007	105361737	3
ENSMUSG00000051285	0.227012	0.182214	0.432177	0.00142259	Pcmtd1	protein-L-isoaspartate (D-aspartate) O-methyltransferase domain containing 1 [Source:MGI Symbol;Acc:MGI:2441773]	7088920	7173628	8
ENSMUSG00000036887	0.169797	0.523215	-0.614554	0.0014232	C1qa	complement component 1, q subcomponent, alpha polypeptide [Source:MGI Symbol;Acc:MGI:88223]	136895917	136898803	1
ENSMUSG00000044345	0.155773	0.734227	0.955526	0.00142562	Marveld1	MARVEL (membrane-associating) domain containing 1 [Source:MGI Symbol;Acc:MGI:2147570]	42147400	42151703	2
ENSMUSG00000066684	0.222033	0.530923	-0.800989	0.001433	Pilrb1	paired immunoglobin-like type 2 receptor beta 1 [Source:MGI Symbol;Acc:MGI:2450532]	137852147	137858106	6
ENSMUSG00000059820	0.0804217	0.431274	0.247631	0.00144716	Nkapd1	NKAP domain containing 1 [Source:MGI Symbol;Acc:MGI:2143205]	50605240	50617464	5
ENSMUSG00000058715	-0.0271486	0.952655	-0.819708	0.00144716	Fcer1g	Fc receptor, IgE, high affinity I, gamma polypeptide [Source:MGI Symbol;Acc:MGI:95496]	171229572	171234365	3
ENSMUSG00000040464	0.121666	0.430755	0.371154	0.00144918	Gtpbp10	GTP-binding protein 10 (putative) [Source:MGI Symbol;Acc:MGI:2385599]	5537454	5559538	11
ENSMUSG00000021281	-0.017993	0.97644	-1.02007	0.0014527	Tnfaip2	tumor necrosis factor, alpha-induced protein 2 [Source:MGI Symbol;Acc:MGI:104960]	111442469	111455018	11
ENSMUSG00000058571	0.0875607	0.905645	1.43705	0.0014527	Gpc6	glypican 6 [Source:MGI Symbol;Acc:MGI:1346322]	116925315	117976544	4
ENSMUSG00000090062	0.304534	0.566558	1.25541	0.00145499	Galnt6os	polypeptide N-acetylgalactosaminyltransferase 6, opposite strand [Source:MGI Symbol;Acc:MGI:1916281]	100695773	100704896	3
ENSMUSG00000028149	-0.275435	0.0554952	-0.377927	0.00145499	Rap1gds1	RAP1, GTP-GDP dissociation stimulator 1 [Source:MGI Symbol;Acc:MGI:2385189]	138925902	139075201	9
ENSMUSG00000046694	0.210386	0.675583	1.09959	0.00145904	Tent5b	terminal nucleotidyltransferase 5B [Source:MGI Symbol;Acc:MGI:2140500]	133480132	133487938	1
ENSMUSG00000078234	-0.700893	0.143477	1.2427	0.00146232	Klhdc7a	kelch domain containing 7A [Source:MGI Symbol;Acc:MGI:2444612]	139960220	139968026	1
ENSMUSG00000032066	0.201733	0.624615	0.920248	0.00146232	Bco2	beta-carotene oxygenase 2 [Source:MGI Symbol;Acc:MGI:2177469]	50533087	50555181	1
ENSMUSG00000015950	0.316133	0.289051	-0.728054	0.00146232	Ncf1	neutrophil cytosolic factor 1 [Source:MGI Symbol;Acc:MGI:97283]	134220053	134229625	7
ENSMUSG00000036322	0.0418778	0.931153	-0.872905	0.00146232	H2-Ea-ps	histocompatibility 2, class II antigen E alpha, pseudogene [Source:MGI Symbol;Acc:MGI:95900]	34341959	34344645	2
ENSMUSG00000108688	0.0652448	0.878026	0.812498	0.00147368	Gm44985	predicted gene 44985 [Source:MGI Symbol;Acc:MGI:5753561]	122167029	122168044	1
ENSMUSG00000056429	-0.150059	0.567065	0.593485	0.00148112	Tgoln1	trans-golgi network protein [Source:MGI Symbol;Acc:MGI:105080]	72608432	72617000	1
ENSMUSG00000022758	0.17423	0.752536	1.1925	0.00148586	P2rx6	purinergic receptor P2X, ligand-gated ion channel, 6 [Source:MGI Symbol;Acc:MGI:1337113]	17561885	17577800	3
ENSMUSG00000007097	0.315387	0.529601	1.15912	0.00149478	Atp1a2	ATPase, Na+/K+ transporting, alpha 2 polypeptide [Source:MGI Symbol;Acc:MGI:88106]	172271709	172298064	5
ENSMUSG00000030499	0.279328	0.375919	0.773207	0.00149973	Kctd15	potassium channel tetramerisation domain containing 15 [Source:MGI Symbol;Acc:MGI:2385276]	34639014	34656732	8
ENSMUSG00000040785	-0.0925101	0.75375	0.604763	0.00149973	Ttc3	tetratricopeptide repeat domain 3 [Source:MGI Symbol;Acc:MGI:1276539]	94370618	94469343	35
ENSMUSG00000058966	0.245368	0.666898	1.31627	0.00149973	Fam57b	family with sequence similarity 57, member B [Source:MGI Symbol;Acc:MGI:1916202]	126797668	126830219	7
ENSMUSG00000079037	0.158031	0.569896	0.629526	0.00149973	Prnp	prion protein [Source:MGI Symbol;Acc:MGI:97769]	131909928	131938429	2
ENSMUSG00000025473	0.112619	0.823792	-0.986819	0.00149973	Adam8	a disintegrin and metallopeptidase domain 8 [Source:MGI Symbol;Acc:MGI:107825]	139978932	139992562	8
ENSMUSG00000032357	0.0600619	0.899491	0.893499	0.00149978	Tinag	tubulointerstitial nephritis antigen [Source:MGI Symbol;Acc:MGI:1349477]	76951693	77045794	2
ENSMUSG00000033705	0.254027	0.39045	0.71563	0.00150521	Stard9	START domain containing 9 [Source:MGI Symbol;Acc:MGI:3045258]	120629121	120731895	7
ENSMUSG00000069601	0.117834	0.636509	0.548462	0.00150553	Ank3	ankyrin 3, epithelial [Source:MGI Symbol;Acc:MGI:88026]	69398773	70027438	47
ENSMUSG00000038070	0.2097	0.581387	0.876501	0.00150553	Cntln	centlein, centrosomal protein [Source:MGI Symbol;Acc:MGI:2443104]	84884309	85131921	4
ENSMUSG00000039232	0.131956	0.700113	-0.724181	0.00150553	Stx11	syntaxin 11 [Source:MGI Symbol;Acc:MGI:1921982]	12938209	12964298	4
ENSMUSG00000021055	-0.0649182	0.959178	2.54998	0.00151005	Esr2	estrogen receptor 2 (beta) [Source:MGI Symbol;Acc:MGI:109392]	76120419	76177259	5
ENSMUSG00000029344	-0.136515	0.404878	-0.391065	0.00151786	Tpst2	protein-tyrosine sulfotransferase 2 [Source:MGI Symbol;Acc:MGI:1309516]	112276691	112315361	7
ENSMUSG00000060301	0.258605	0.311935	0.626747	0.00152556	2610008E11Rik	RIKEN cDNA 2610008E11 gene [Source:MGI Symbol;Acc:MGI:1919378]	79064374	79097600	4
ENSMUSG00000066175	0.281765	0.470545	0.95503	0.00152911	2510046G10Rik	RIKEN cDNA 2510046G10 gene [Source:MGI Symbol;Acc:MGI:3698051]	126648543	126649594	2
ENSMUSG00000021416	-0.201221	0.875721	2.4875	0.00153447	Eci3	enoyl-Coenzyme A delta isomerase 3 [Source:MGI Symbol;Acc:MGI:1916373]	34946614	34963810	2
ENSMUSG00000048458	0.234579	0.570056	0.948533	0.00154431	Inka2	inka box actin regulator 2 [Source:MGI Symbol;Acc:MGI:1923497]	105704599	105720842	2
ENSMUSG00000076441	-0.296297	0.343614	-0.752647	0.00154677	Ass1	argininosuccinate synthetase 1 [Source:MGI Symbol;Acc:MGI:88090]	31470207	31520672	4
ENSMUSG00000031490	-0.304762	0.532235	-1.11666	0.00154818	Eif4ebp1	eukaryotic translation initiation factor 4E binding protein 1 [Source:MGI Symbol;Acc:MGI:103267]	27260329	27276674	2
ENSMUSG00000052496	0.0699156	0.886461	0.959542	0.00154818	Pkdrej	polycystin (PKD) family receptor for egg jelly [Source:MGI Symbol;Acc:MGI:1338786]	85814670	85821734	1
ENSMUSG00000074736	0.305227	0.640337	1.48337	0.00154854	Syndig1	synapse differentiation inducing 1 [Source:MGI Symbol;Acc:MGI:3702158]	149829211	150004392	6
ENSMUSG00000047115	0.112018	0.836584	1.09684	0.00155568	Fam221a	family with sequence similarity 221, member A [Source:MGI Symbol;Acc:MGI:2442161]	49367739	49390539	6
ENSMUSG00000060961	-0.511351	0.291038	1.18188	0.00155847	Slc4a4	solute carrier family 4 (anion exchanger), member 4 [Source:MGI Symbol;Acc:MGI:1927555]	88886818	89239653	8
ENSMUSG00000107369	-0.609914	0.280529	1.45466	0.00155914	Gstm2-ps1	glutathione S-transferase mu 2 (muscle), pseudogene 1 [Source:MGI Symbol;Acc:MGI:3648223]	116632908	116633564	1
ENSMUSG00000045019	0.0279513	0.977007	1.6109	0.00156078	Acer1	alkaline ceramidase 1 [Source:MGI Symbol;Acc:MGI:2181962]	56953490	56982126	1
ENSMUSG00000024070	-0.0194268	0.945974	0.519499	0.00156463	Prkd3	protein kinase D3 [Source:MGI Symbol;Acc:MGI:1922542]	78949405	79020816	8
ENSMUSG00000031147	0.224471	0.727353	1.5341	0.00156543	Magix	MAGI family member, X-linked [Source:MGI Symbol;Acc:MGI:1859644]	7673164	7681251	2
ENSMUSG00000028522	0.28016	0.16558	0.51075	0.00156615	Mier1	MEIR1 treanscription regulator [Source:MGI Symbol;Acc:MGI:1918398]	103114390	103165754	15
ENSMUSG00000029223	0.16828	0.710958	0.972975	0.00156642	Uchl1	ubiquitin carboxy-terminal hydrolase L1 [Source:MGI Symbol;Acc:MGI:103149]	66676091	66687234	4
ENSMUSG00000029070	0.190665	0.66816	0.958134	0.00156642	Mxra8	matrix-remodelling associated 8 [Source:MGI Symbol;Acc:MGI:1922011]	155839680	155844088	7
ENSMUSG00000073293	-0.0357534	0.966174	1.73592	0.00156768	Nudt10	nudix (nucleoside diphosphate linked moiety X)-type motif 10 [Source:MGI Symbol;Acc:MGI:2147931]	6168696	6173015	1
ENSMUSG00000090191	0.0888361	0.860669	0.982148	0.00157128	9230105E05Rik	RIKEN cDNA 9230105E05 gene [Source:MGI Symbol;Acc:MGI:2444388]	120389523	120392793	1
ENSMUSG00000097059	0.289668	0.339627	0.737786	0.00157339	Fam120aos	family with sequence similarity 120A, opposite strand [Source:MGI Symbol;Acc:MGI:1915378]	48968287	48972031	1
ENSMUSG00000034723	0.10297	0.693726	0.561493	0.00158231	Tmx4	thioredoxin-related transmembrane protein 4 [Source:MGI Symbol;Acc:MGI:106558]	134594185	134644145	4
ENSMUSG00000050222	0.195221	0.599031	0.837377	0.00158231	Il17d	interleukin 17D [Source:MGI Symbol;Acc:MGI:2446510]	57524777	57543166	1
ENSMUSG00000020541	0.00981166	0.949381	0.277002	0.00158231	Tom1l1	target of myb1-like 1 (chicken) [Source:MGI Symbol;Acc:MGI:1919193]	90643465	90688366	8
ENSMUSG00000020542	0.401336	0.357339	1.05597	0.00158231	Myocd	myocardin [Source:MGI Symbol;Acc:MGI:2137495]	65176561	65269989	6
ENSMUSG00000038968	0.164228	0.960668	6.33812	0.00158231	Klk1b16	kallikrein 1-related peptidase b16 [Source:MGI Symbol;Acc:MGI:891982]	44136767	44141610	1
ENSMUSG00000022803	0.213686	0.528334	0.781843	0.00158231	Popdc2	popeye domain containing 2 [Source:MGI Symbol;Acc:MGI:1930150]	38362209	38378216	5
ENSMUSG00000026749	-0.136838	0.411798	-0.394913	0.00158231	Nek6	NIMA (never in mitosis gene a)-related expressed kinase 6 [Source:MGI Symbol;Acc:MGI:1891638]	38511643	38594606	5
ENSMUSG00000033352	-0.22619	0.208735	-0.447606	0.00158231	Map2k4	mitogen-activated protein kinase kinase 4 [Source:MGI Symbol;Acc:MGI:1346869]	65688243	65788297	7
ENSMUSG00000073489	-0.529431	0.379338	-1.43865	0.00158231	Ifi204	interferon activated gene 204 [Source:MGI Symbol;Acc:MGI:96429]	173747293	173766943	2
ENSMUSG00000073987	0.444878	0.320538	1.07992	0.00158677	Ggh	gamma-glutamyl hydrolase [Source:MGI Symbol;Acc:MGI:1329035]	20042052	20066750	1
ENSMUSG00000082424	-0.447687	0.108238	-0.718465	0.00158677	Gm13292	predicted gene 13292 [Source:MGI Symbol;Acc:MGI:3649470]	11409031	11410030	1
ENSMUSG00000029420	0.0183518	0.967898	0.814367	0.00158677	Rimbp2	RIMS binding protein 2 [Source:MGI Symbol;Acc:MGI:2443235]	128757791	128953486	7
ENSMUSG00000025279	-0.24117	0.563474	-0.939258	0.00158823	Dnase1l3	deoxyribonuclease 1-like 3 [Source:MGI Symbol;Acc:MGI:1314633]	7964533	7994573	2
ENSMUSG00000021779	-0.233682	0.704536	1.30802	0.00158833	Thrb	thyroid hormone receptor beta [Source:MGI Symbol;Acc:MGI:98743]	17660261	18038090	7
ENSMUSG00000029449	-0.340778	0.319788	-0.82569	0.00159593	Rhof	ras homolog family member F (in filopodia) [Source:MGI Symbol;Acc:MGI:1345629]	123103044	123132692	4
ENSMUSG00000032300	0.0388461	0.901925	-0.581631	0.00159593	1700017B05Rik	RIKEN cDNA 1700017B05 gene [Source:MGI Symbol;Acc:MGI:1921461]	57253117	57262612	6
ENSMUSG00000028497	0.273152	0.177571	0.513871	0.00159913	Hacd4	3-hydroxyacyl-CoA dehydratase 4 [Source:MGI Symbol;Acc:MGI:1914025]	88396144	88438928	3
ENSMUSG00000032855	0.200547	0.513033	0.703272	0.0016131	Pkd1	polycystin 1, transient receptor poteintial channel interacting [Source:MGI Symbol;Acc:MGI:97603]	24549834	24596508	10
ENSMUSG00000020277	-0.482744	0.0138842	-0.521789	0.0016131	Pfkl	phosphofructokinase, liver, B-type [Source:MGI Symbol;Acc:MGI:97547]	77986947	78010083	8
ENSMUSG00000085936			2.19238	0.0016152	2610307P16Rik	RIKEN cDNA 2610307P16 gene [Source:MGI Symbol;Acc:MGI:1919768]	28460034	28885620	7
ENSMUSG00000001761	-0.0746087	0.814322	0.625366	0.00161694	Smo	smoothened, frizzled class receptor [Source:MGI Symbol;Acc:MGI:108075]	29735503	29761365	2
ENSMUSG00000023484	0.275908	0.540651	1.03805	0.00162075	Prph	peripherin [Source:MGI Symbol;Acc:MGI:97774]	99055174	99058978	4
ENSMUSG00000069814	0.236593	0.622505	1.09577	0.00162544	Ccdc92b	coiled-coil domain containing 92B [Source:MGI Symbol;Acc:MGI:3588240]	74619605	74641516	1
ENSMUSG00000023460	0.29888	0.0466578	0.393189	0.00162689	Rab12	RAB12, member RAS oncogene family [Source:MGI Symbol;Acc:MGI:894284]	66494512	66519729	5
ENSMUSG00000028573	-0.178123	0.401631	0.513708	0.00162708	Fggy	FGGY carbohydrate kinase domain containing [Source:MGI Symbol;Acc:MGI:1922828]	95557507	95926939	18
ENSMUSG00000003644	-0.185193	0.181302	-0.347404	0.00162708	Rps6ka1	ribosomal protein S6 kinase polypeptide 1 [Source:MGI Symbol;Acc:MGI:104558]	133847290	133887797	9
ENSMUSG00000031494	1.00537	0.0485515	1.36855	0.00162827	Cd209a	CD209a antigen [Source:MGI Symbol;Acc:MGI:2157942]	3743397	3748984	4
ENSMUSG00000022841	-0.30448	0.0577197	-0.416477	0.00163205	Ap2m1	adaptor-related protein complex 2, mu 1 subunit [Source:MGI Symbol;Acc:MGI:1298405]	20535478	20544909	11
ENSMUSG00000030091	-0.10699	0.742891	-0.666157	0.00163506	Nup210	nucleoporin 210 [Source:MGI Symbol;Acc:MGI:1859555]	91013068	91116829	11
ENSMUSG00000025006	0.173837	0.585604	0.713124	0.0016386	Sorbs1	sorbin and SH3 domain containing 1 [Source:MGI Symbol;Acc:MGI:700014]	40294753	40513779	25
ENSMUSG00000030934	-0.348791	0.295387	0.807867	0.00164605	Oat	ornithine aminotransferase [Source:MGI Symbol;Acc:MGI:97394]	132557478	132576398	2
ENSMUSG00000085803	1.18419	0.244828	2.54397	0.00164605	Gm12056	predicted gene 12056 [Source:MGI Symbol;Acc:MGI:3652309]	22734038	22737937	1
ENSMUSG00000025027	-0.445765	0.0507473	-0.592968	0.00164605	Xpnpep1	X-prolyl aminopeptidase (aminopeptidase P) 1, soluble [Source:MGI Symbol;Acc:MGI:2180003]	52931926	53040214	17
ENSMUSG00000048126	0.0269718	0.952895	0.812644	0.00164605	Col6a3	collagen, type VI, alpha 3 [Source:MGI Symbol;Acc:MGI:88461]	90765923	90843971	8
ENSMUSG00000021451	-0.0894819	0.797721	-0.69122	0.00164605	Sema4d	sema domain, immunoglobulin domain (Ig), transmembrane domain (TM) and short cytoplasmic domain, (semaphorin) 4D [Source:MGI Symbol;Acc:MGI:109244]	51685529	51793747	14
ENSMUSG00000023456	-0.227464	0.393729	-0.631578	0.00164608	Tpi1	triosephosphate isomerase 1 [Source:MGI Symbol;Acc:MGI:98797]	124810586	124814296	6
ENSMUSG00000030226	0.0731028	0.960471	2.96039	0.00165459	Lmo3	LIM domain only 3 [Source:MGI Symbol;Acc:MGI:102810]	138362918	138581968	8
ENSMUSG00000053141	-0.406312	0.431267	1.28791	0.00165459	Ptprt	protein tyrosine phosphatase, receptor type, T [Source:MGI Symbol;Acc:MGI:1321152]	161521990	162661147	6
ENSMUSG00000000791	-0.0774835	0.910553	-1.23096	0.00165459	Il12rb1	interleukin 12 receptor, beta 1 [Source:MGI Symbol;Acc:MGI:104579]	70808449	70821424	6
ENSMUSG00000031994	0.348699	0.288293	0.812721	0.00165508	Adamts8	a disintegrin-like and metallopeptidase (reprolysin type) with thrombospondin type 1 motif, 8 [Source:MGI Symbol;Acc:MGI:1353468]	30942562	30963838	2
ENSMUSG00000049288	0.143178	0.564893	0.562442	0.00165538	Lix1l	Lix1-like [Source:MGI Symbol;Acc:MGI:3036267]	96601149	96626171	2
ENSMUSG00000090925			3.63195	0.00165902	1810064F22Rik	RIKEN cDNA 1810064F22 gene [Source:MGI Symbol;Acc:MGI:1917112]	22196963	22213860	3
ENSMUSG00000046442	0.432548	0.406155	1.24843	0.00166548	Ppm1e	protein phosphatase 1E (PP2C domain containing) [Source:MGI Symbol;Acc:MGI:2444096]	87226906	87359023	2
ENSMUSG00000004451	-0.183504	0.280079	-0.41281	0.00166747	Ralb	v-ral simian leukemia viral oncogene B [Source:MGI Symbol;Acc:MGI:1927244]	119470305	119504794	3
ENSMUSG00000048163	0.0678481	0.88364	-0.865668	0.001671	Selplg	selectin, platelet (p-selectin) ligand [Source:MGI Symbol;Acc:MGI:106689]	113818536	113832644	6
ENSMUSG00000040616	-0.155246	0.617575	-0.68062	0.0016753	Tmem51	transmembrane protein 51 [Source:MGI Symbol;Acc:MGI:2384874]	142030992	142084304	1
ENSMUSG00000028782	0.644533	0.187344	1.25181	0.00167681	Adgrb2	adhesion G protein-coupled receptor B2 [Source:MGI Symbol;Acc:MGI:2451244]	129984870	130022633	13
ENSMUSG00000039427	-0.339645	0.0169534	-0.377154	0.00167681	Alg1	asparagine-linked glycosylation 1 (beta-1,4-mannosyltransferase) [Source:MGI Symbol;Acc:MGI:2384774]	5233621	5244912	5
ENSMUSG00000025351	0.155751	0.337363	0.387872	0.00168145	Cd63	CD63 antigen [Source:MGI Symbol;Acc:MGI:99529]	128900989	128912822	6
ENSMUSG00000047842	-0.061759	0.927329	1.24691	0.00168183	Diras2	DIRAS family, GTP-binding RAS-like 2 [Source:MGI Symbol;Acc:MGI:1915453]	52504380	52531279	1
ENSMUSG00000068877	-0.40689	0.556647	1.55688	0.00168385	Selenbp2	selenium binding protein 2 [Source:MGI Symbol;Acc:MGI:104859]	94693556	94704413	7
ENSMUSG00000083879	0.215431	0.435413	0.676582	0.00168385	Gm14038	predicted gene 14038 [Source:MGI Symbol;Acc:MGI:3650657]	134762824	134763630	1
ENSMUSG00000025410	-0.142972	0.247686	-0.303432	0.00168385	Dctn2	dynactin 2 [Source:MGI Symbol;Acc:MGI:107733]	127266368	127281950	5
ENSMUSG00000025464	-0.109308	0.612746	-0.472736	0.00168606	Paox	polyamine oxidase (exo-N4-amino) [Source:MGI Symbol;Acc:MGI:1916983]	140115799	140137224	5
ENSMUSG00000031842	0.530684	0.134395	0.941127	0.00168606	Pde4c	phosphodiesterase 4C, cAMP specific [Source:MGI Symbol;Acc:MGI:99556]	70723720	70751186	7
ENSMUSG00000019988	0.00246376	0.987515	0.275627	0.00168798	Nedd1	neural precursor cell expressed, developmentally down-regulated gene 1 [Source:MGI Symbol;Acc:MGI:97293]	92684746	92722420	4
ENSMUSG00000085945	0.68937	0.144773	1.3015	0.00168798	2310014F06Rik	RIKEN cDNA 2310014F06 gene [Source:MGI Symbol;Acc:MGI:1916875]	112612560	112680081	2
ENSMUSG00000026204	-0.0368579	0.9539	1.14685	0.00168814	Ptprn	protein tyrosine phosphatase, receptor type, N [Source:MGI Symbol;Acc:MGI:102765]	75247027	75264502	6
ENSMUSG00000081153	-0.374509	0.214193	-0.746114	0.00168814	Gm11401	predicted gene 11401 [Source:MGI Symbol;Acc:MGI:3649407]	6242378	6242721	1
ENSMUSG00000029771	0.181894	0.462938	-0.571529	0.00168814	Irf5	interferon regulatory factor 5 [Source:MGI Symbol;Acc:MGI:1350924]	29526625	29541871	6
ENSMUSG00000064351	0.533603	0.0294632	0.640769	0.00169097	mt-Co1	mitochondrially encoded cytochrome c oxidase I [Source:MGI Symbol;Acc:MGI:102504]	5328	6872	1
ENSMUSG00000021665	-0.279813	0.584049	1.13748	0.00169429	Hexb	hexosaminidase B [Source:MGI Symbol;Acc:MGI:96074]	97176331	97198357	2
ENSMUSG00000043953	-0.201246	0.589318	-0.822224	0.00169768	Ccrl2	chemokine (C-C motif) receptor-like 2 [Source:MGI Symbol;Acc:MGI:1920904]	111054486	111057519	3
ENSMUSG00000026655	-0.0596505	0.830522	0.54044	0.00169776	Fam107b	family with sequence similarity 107, member B [Source:MGI Symbol;Acc:MGI:1913790]	3570488	3782142	9
ENSMUSG00000028986	0.138716	0.606796	0.595936	0.00170979	Klhl7	kelch-like 7 [Source:MGI Symbol;Acc:MGI:1196453]	24100605	24160792	4
ENSMUSG00000079470	0.198446	0.542963	0.739496	0.00171045	Utp14b	UTP14B small subunit processome component [Source:MGI Symbol;Acc:MGI:2445092]	78658038	78671512	2
ENSMUSG00000031089	0.391568	0.258819	0.845416	0.00172006	Slc6a14	solute carrier family 6 (neurotransmitter transporter), member 14 [Source:MGI Symbol;Acc:MGI:1890216]	21714896	21742355	1
ENSMUSG00000056014	0.162792	0.67285	0.830151	0.00172446	A430033K04Rik	RIKEN cDNA A430033K04 gene [Source:MGI Symbol;Acc:MGI:3583896]	138622859	138652414	4
ENSMUSG00000075588	0.454578	0.362204	1.2041	0.00172935	Hoxb2	homeobox B2 [Source:MGI Symbol;Acc:MGI:96183]	96350525	96354012	2
ENSMUSG00000032228	0.028499	0.848122	0.288035	0.00173065	Tcf12	transcription factor 12 [Source:MGI Symbol;Acc:MGI:101877]	71842688	72111871	21
ENSMUSG00000059108	-0.169456	0.786366	-1.21237	0.00173065	Ifitm6	interferon induced transmembrane protein 6 [Source:MGI Symbol;Acc:MGI:2686976]	141015699	141017924	3
ENSMUSG00000085180	0.926815	0.0107909	0.975594	0.0017351	AI838599	expressed sequence AI838599 [Source:MGI Symbol;Acc:MGI:3510989]	3242055	3258092	5
ENSMUSG00000008384	-0.081668	0.824131	-0.709486	0.00173731	Sertad1	SERTA domain containing 1 [Source:MGI Symbol;Acc:MGI:1913438]	27486910	27490316	2
ENSMUSG00000025235	0.126884	0.658482	0.631344	0.00173969	Bbs4	Bardet-Biedl syndrome 4 (human) [Source:MGI Symbol;Acc:MGI:2143311]	59321990	59353508	4
ENSMUSG00000021733	0.142277	0.419318	0.412318	0.00174429	Slc4a7	solute carrier family 4, sodium bicarbonate cotransporter, member 7 [Source:MGI Symbol;Acc:MGI:2443878]	14702279	14799940	25
ENSMUSG00000073802	-0.131705	0.703875	0.727457	0.00174983	Cdkn2b	cyclin dependent kinase inhibitor 2B [Source:MGI Symbol;Acc:MGI:104737]	89306299	89311039	1
ENSMUSG00000049928	-0.0874189	0.895413	1.2329	0.00175653	Glp2r	glucagon-like peptide 2 receptor [Source:MGI Symbol;Acc:MGI:2136733]	67661502	67771153	2
ENSMUSG00000035258	0.150478	0.80059	1.17496	0.00175751	Abi3bp	ABI gene family, member 3 (NESH) binding protein [Source:MGI Symbol;Acc:MGI:2444583]	56477878	56690135	8
ENSMUSG00000028518	0.00647482	0.980332	0.422846	0.00176325	Prkaa2	protein kinase, AMP-activated, alpha 2 catalytic subunit [Source:MGI Symbol;Acc:MGI:1336173]	105029874	105109890	1
ENSMUSG00000037892	-0.160277	0.70381	0.897039	0.00176325	Pcdh18	protocadherin 18 [Source:MGI Symbol;Acc:MGI:1920423]	49743296	49757325	5
ENSMUSG00000059040	-0.406759	0.189881	-0.768565	0.00176723	Eno1b	enolase 1B, retrotransposed [Source:MGI Symbol;Acc:MGI:3648653]	48045335	48048412	2
ENSMUSG00000062563	0.33497	0.448039	1.05239	0.00176779	Cys1	cystin 1 [Source:MGI Symbol;Acc:MGI:2177632]	24665833	24681813	8
ENSMUSG00000038495	-0.258367	0.148314	-0.449206	0.00177025	Otud7b	OTU domain containing 7B [Source:MGI Symbol;Acc:MGI:2654703]	96104527	96161129	8
ENSMUSG00000031451	-0.428233	0.139913	0.729885	0.00177257	Gas6	growth arrest specific 6 [Source:MGI Symbol;Acc:MGI:95660]	13465374	13494490	1
ENSMUSG00000039997	-0.274956	0.531818	-0.992921	0.00177762	Ifi203	interferon activated gene 203 [Source:MGI Symbol;Acc:MGI:96428]	173920407	173942672	9
ENSMUSG00000028581	0.148658	0.768954	-1.00781	0.00177871	Laptm5	lysosomal-associated protein transmembrane 5 [Source:MGI Symbol;Acc:MGI:108046]	130913125	130936141	10
ENSMUSG00000025086	0.0839983	0.54619	0.323654	0.00177971	Trub1	TruB pseudouridine (psi) synthase family member 1 [Source:MGI Symbol;Acc:MGI:1919383]	57452912	57491005	4
ENSMUSG00000033960	0.267401	0.356528	0.693792	0.00178392	Jcad	junctional cadherin 5 associated [Source:MGI Symbol;Acc:MGI:2685174]	4634878	4682869	3
ENSMUSG00000028907	0.0114201	0.956105	0.36514	0.00178394	Utp11	UTP11 small subunit processome component [Source:MGI Symbol;Acc:MGI:1914455]	124678160	124693600	2
ENSMUSG00000031478	0.0909655	0.829612	0.828414	0.00178617	Nek3	NIMA (never in mitosis gene a)-related expressed kinase 3 [Source:MGI Symbol;Acc:MGI:1344371]	22128283	22166435	4
ENSMUSG00000041216			2.95165	0.00178771	Clvs1	clavesin 1 [Source:MGI Symbol;Acc:MGI:1921688]	9269293	9451691	8
ENSMUSG00000038702	0.227084	0.469463	0.731177	0.0017958	Dsel	dermatan sulfate epimerase-like [Source:MGI Symbol;Acc:MGI:2442948]	111858702	111864918	4
ENSMUSG00000019088	0.220865	0.0918711	0.338032	0.00180028	Dnase1l1	deoxyribonuclease 1-like 1 [Source:MGI Symbol;Acc:MGI:109628]	74273217	74282337	6
ENSMUSG00000032118	0.23252	0.744954	1.54575	0.00180304	Fez1	fasciculation and elongation protein zeta 1 (zygin I) [Source:MGI Symbol;Acc:MGI:2670976]	36821864	36878924	10
ENSMUSG00000016256	-0.124818	0.741784	-0.767436	0.00180304	Ctsz	cathepsin Z [Source:MGI Symbol;Acc:MGI:1891190]	174427493	174439039	1
ENSMUSG00000031803	-0.586381	0.0119613	-0.616173	0.00180772	B3gnt3	UDP-GlcNAc:betaGal beta-1,3-N-acetylglucosaminyltransferase 3 [Source:MGI Symbol;Acc:MGI:2152535]	71690756	71701789	1
ENSMUSG00000043262	-0.123996	0.451985	0.388983	0.00181157	Uevld	UEV and lactate/malate dehyrogenase domains [Source:MGI Symbol;Acc:MGI:1860490]	46923216	46958527	6
ENSMUSG00000039114	0.437656	0.373329	1.19879	0.00181631	Nrn1	neuritin 1 [Source:MGI Symbol;Acc:MGI:1915654]	36725361	36735131	5
ENSMUSG00000034059	0.176174	0.807476	1.4842	0.0018175	Ypel4	yippee like 4 [Source:MGI Symbol;Acc:MGI:3605071]	84734058	84738655	4
ENSMUSG00000024029	0.280805	0.492998	0.932565	0.00182471	Tff3	trefoil factor 3, intestinal [Source:MGI Symbol;Acc:MGI:104638]	31125306	31129646	1
ENSMUSG00000032086	-0.0179221	0.939299	0.417404	0.00182607	Bace1	beta-site APP cleaving enzyme 1 [Source:MGI Symbol;Acc:MGI:1346542]	45838580	45864399	6
ENSMUSG00000021760	0.68454	0.0213677	0.782702	0.00183231	Gpx8	glutathione peroxidase 8 (putative) [Source:MGI Symbol;Acc:MGI:1916840]	113042753	113046410	2
ENSMUSG00000031349	-0.410765	0.193656	-0.77913	0.00183231	Nsdhl	NAD(P) dependent steroid dehydrogenase-like [Source:MGI Symbol;Acc:MGI:1099438]	72918557	72958514	2
ENSMUSG00000040359	0.0507216	0.718592	0.29306	0.00183677	Ufl1	UFM1 specific ligase 1 [Source:MGI Symbol;Acc:MGI:1914740]	25248600	25281821	4
ENSMUSG00000022305	0.372958	0.19423	0.719769	0.00184734	Lrp12	low density lipoprotein-related protein 12 [Source:MGI Symbol;Acc:MGI:2443132]	39870589	39943994	4
ENSMUSG00000050270	0.23995	0.337363	0.599074	0.00185127	Tmem220	transmembrane protein 220 [Source:MGI Symbol;Acc:MGI:2443691]	67025154	67035312	2
ENSMUSG00000074912	-0.0374768	0.934759	0.82945	0.00185739	Gm14207	predicted gene 14207 [Source:MGI Symbol;Acc:MGI:3649550]	119321187	119326194	3
ENSMUSG00000080316	0.411756	0.136093	0.700669	0.00185794	Spaca6	sperm acrosome associated 6 [Source:MGI Symbol;Acc:MGI:1922452]	17827158	17843009	16
ENSMUSG00000027078	-0.0975123	0.80964	-0.785622	0.00185794	Ube2l6	ubiquitin-conjugating enzyme E2L 6 [Source:MGI Symbol;Acc:MGI:1914500]	84798828	84810335	4
ENSMUSG00000033880	-0.502836	0.0503962	-0.660346	0.00185794	Lgals3bp	lectin, galactoside-binding, soluble, 3 binding protein [Source:MGI Symbol;Acc:MGI:99554]	118392751	118402092	5
ENSMUSG00000004110	0.460305	0.361968	1.19388	0.00185794	Cacna1e	calcium channel, voltage-dependent, R type, alpha 1E subunit [Source:MGI Symbol;Acc:MGI:106217]	154390731	154884501	8
ENSMUSG00000030493	-0.673114	0.00324489	-0.615401	0.00185794	Faap24	Fanconi anemia core complex associated protein 24 [Source:MGI Symbol;Acc:MGI:2142208]	35392152	35396836	3
ENSMUSG00000026979	-0.111496	0.437307	-0.332818	0.00187191	Psd4	pleckstrin and Sec7 domain containing 4 [Source:MGI Symbol;Acc:MGI:2674093]	24367580	24414954	10
ENSMUSG00000002103	-0.0524272	0.620767	-0.230349	0.00187458	Acp2	acid phosphatase 2, lysosomal [Source:MGI Symbol;Acc:MGI:87882]	91202885	91214098	5
ENSMUSG00000046982	-0.242755	0.273783	0.53582	0.00188016	Tshz1	teashirt zinc finger family member 1 [Source:MGI Symbol;Acc:MGI:1346031]	84011627	84087706	4
ENSMUSG00000046753	0.316007	0.138989	0.540927	0.00188203	Ccdc66	coiled-coil domain containing 66 [Source:MGI Symbol;Acc:MGI:2443639]	27481090	27508460	3
ENSMUSG00000024369	-0.286139	0.143547	-0.489556	0.00188401	Nelfe	negative elongation factor complex member E, Rdbp [Source:MGI Symbol;Acc:MGI:102744]	34850391	34856372	7
ENSMUSG00000073791	0.505019	0.0748038	0.748038	0.00188401	Efcab7	EF-hand calcium binding domain 7 [Source:MGI Symbol;Acc:MGI:2385199]	99829198	99912788	5
ENSMUSG00000031149	-0.287662	0.187059	-0.53848	0.00188608	Praf2	PRA1 domain family 2 [Source:MGI Symbol;Acc:MGI:1859607]	7728439	7731064	1
ENSMUSG00000027698	0.328436	0.291437	0.748018	0.00188775	Nceh1	neutral cholesterol ester hydrolase 1 [Source:MGI Symbol;Acc:MGI:2443191]	27182965	27284608	5
ENSMUSG00000032562	-0.187944	0.282999	-0.420105	0.00189047	Gnai2	guanine nucleotide binding protein (G protein), alpha inhibiting 2 [Source:MGI Symbol;Acc:MGI:95772]	107614125	107635367	10
ENSMUSG00000020623	-0.238304	0.423678	0.706785	0.0018948	Map2k6	mitogen-activated protein kinase kinase 6 [Source:MGI Symbol;Acc:MGI:1346870]	110399122	110525522	5
ENSMUSG00000074218	0.158854	0.748066	0.996396	0.0018948	Cox7a1	cytochrome c oxidase subunit 7A1 [Source:MGI Symbol;Acc:MGI:1316714]	30184144	30186078	2
ENSMUSG00000040855	0.0237113	0.941934	0.566551	0.0018948	Reps2	RALBP1 associated Eps domain containing protein 2 [Source:MGI Symbol;Acc:MGI:2663511]	162411954	162643649	5
ENSMUSG00000029865	0.516241	0.230909	1.0496	0.00189645	Sval1	seminal vesicle antigen-like 1 [Source:MGI Symbol;Acc:MGI:1918828]	41951630	41956098	1
ENSMUSG00000035642	0.410518	0.118064	0.66359	0.0019041	Aamdc	adipogenesis associated Mth938 domain containing [Source:MGI Symbol;Acc:MGI:1913523]	97550331	97579497	15
ENSMUSG00000033099	-0.192591	0.281352	-0.429535	0.00190897	Nol12	nucleolar protein 12 [Source:MGI Symbol;Acc:MGI:2146285]	78934933	78943638	4
ENSMUSG00000045767	0.0790924	0.626967	0.352467	0.00191378	B230219D22Rik	RIKEN cDNA B230219D22 gene [Source:MGI Symbol;Acc:MGI:1925771]	55693124	55703500	1
ENSMUSG00000037855	0.532904	0.244224	1.15729	0.00191639	Zfp365	zinc finger protein 365 [Source:MGI Symbol;Acc:MGI:2143676]	67886103	67912662	4
ENSMUSG00000070695			2.22649	0.00192251	Cntnap5a	contactin associated protein-like 5A [Source:MGI Symbol;Acc:MGI:3643623]	115684756	116587323	1
ENSMUSG00000042485	0.19095	0.594364	0.785162	0.00192886	Mustn1	musculoskeletal, embryonic nuclear protein 1 [Source:MGI Symbol;Acc:MGI:1913425]	30879200	30881610	1
ENSMUSG00000043943	0.247612	0.538121	0.960605	0.00192886	Naalad2	N-acetylated alpha-linked acidic dipeptidase 2 [Source:MGI Symbol;Acc:MGI:1919810]	18321951	18402995	8
ENSMUSG00000002944	0.652762	0.21587	1.28978	0.00193115	Cd36	CD36 molecule [Source:MGI Symbol;Acc:MGI:107899]	17781690	17888801	6
ENSMUSG00000031214	-0.084756	0.781011	0.603431	0.00193355	Ophn1	oligophrenin 1 [Source:MGI Symbol;Acc:MGI:2151070]	98554277	98891025	10
ENSMUSG00000006418	-0.119665	0.505406	-0.40572	0.00193724	Rnf114	ring finger protein 114 [Source:MGI Symbol;Acc:MGI:1933159]	167492645	167516173	3
ENSMUSG00000026062	-0.0449229	0.927524	0.8755	0.00193827	Slc9a2	solute carrier family 9 (sodium/hydrogen exchanger), member 2 [Source:MGI Symbol;Acc:MGI:105075]	40680574	40769273	3
ENSMUSG00000032265	0.0482063	0.829017	0.428518	0.00193827	Tent5a	terminal nucleotidyltransferase 5A [Source:MGI Symbol;Acc:MGI:2670964]	85320439	85327348	2
ENSMUSG00000054555	0.0197803	0.97419	-0.988853	0.001956	Adam12	a disintegrin and metallopeptidase domain 12 (meltrin alpha) [Source:MGI Symbol;Acc:MGI:105378]	133883199	134232146	7
ENSMUSG00000022668	0.0210825	0.890851	0.287811	0.00197031	Gtpbp8	GTP-binding protein 8 (putative) [Source:MGI Symbol;Acc:MGI:1913317]	44736768	44746363	4
ENSMUSG00000005087	-0.131675	0.580487	-0.524083	0.00197104	Cd44	CD44 antigen [Source:MGI Symbol;Acc:MGI:88338]	102811141	102901665	9
ENSMUSG00000062093	-0.507206	0.0527509	-0.670356	0.00197547	Gm10110	predicted gene 10110 [Source:MGI Symbol;Acc:MGI:3641718]	89896228	89899447	2
ENSMUSG00000102145	-0.030916	0.911154	0.500129	0.00197576	Gm38056	predicted gene, 38056 [Source:MGI Symbol;Acc:MGI:5611284]	55440904	55445930	1
ENSMUSG00000016346	0.409784	0.409199	1.2011	0.00197865	Kcnq2	potassium voltage-gated channel, subfamily Q, member 2 [Source:MGI Symbol;Acc:MGI:1309503]	181075579	181135300	21
ENSMUSG00000028464	0.222762	0.529656	0.793959	0.00197933	Tpm2	tropomyosin 2, beta [Source:MGI Symbol;Acc:MGI:98810]	43514711	43523765	6
ENSMUSG00000030255	0.375626	0.275999	0.834077	0.00198073	Sspn	sarcospan [Source:MGI Symbol;Acc:MGI:1353511]	145931641	145965223	3
ENSMUSG00000032135	0.153122	0.659966	0.738406	0.00198241	Mcam	melanoma cell adhesion molecule [Source:MGI Symbol;Acc:MGI:1933966]	44134469	44142727	6
ENSMUSG00000038725	0.635903	0.128312	1.06335	0.00198241	Pkhd1l1	polycystic kidney and hepatic disease 1-like 1 [Source:MGI Symbol;Acc:MGI:2183153]	44457494	44601369	6
ENSMUSG00000050288	0.132125	0.753877	0.849102	0.00198422	Fzd2	frizzled class receptor 2 [Source:MGI Symbol;Acc:MGI:1888513]	102604396	102608058	1
ENSMUSG00000020130	0.169709	0.35306	0.430032	0.00198681	Tbc1d15	TBC1 domain family, member 15 [Source:MGI Symbol;Acc:MGI:1913937]	115197872	115251467	4
ENSMUSG00000031616	-0.00832804	0.989251	1.0541	0.00199104	Ednra	endothelin receptor type A [Source:MGI Symbol;Acc:MGI:105923]	77663031	77724464	2
ENSMUSG00000049265	0.217461	0.695239	1.17038	0.00200292	Kcnk3	potassium channel, subfamily K, member 3 [Source:MGI Symbol;Acc:MGI:1100509]	30588170	30625271	2
ENSMUSG00000017204	-0.742231	0.311747	1.82628	0.00200312	Gsdma	gasdermin A [Source:MGI Symbol;Acc:MGI:1889509]	98664351	98677708	1
ENSMUSG00000030407	-0.235923	0.113098	-0.376358	0.00200525	Qpctl	glutaminyl-peptide cyclotransferase-like [Source:MGI Symbol;Acc:MGI:1914619]	19139702	19149291	2
ENSMUSG00000038174	0.296996	0.10803	0.467743	0.00200903	Fam126b	family with sequence similarity 126, member B [Source:MGI Symbol;Acc:MGI:1098784]	58522806	58586323	9
ENSMUSG00000035637	-0.265386	0.384611	-0.7128	0.00200987	Grhpr	glyoxylate reductase/hydroxypyruvate reductase [Source:MGI Symbol;Acc:MGI:1923488]	44981395	44990734	6
ENSMUSG00000091955	-0.181028	0.726035	-1.04616	0.00201278	Gm9844	predicted pseudogene 9844 [Source:MGI Symbol;Acc:MGI:3704288]	24862213	24862697	1
ENSMUSG00000031274	0.183778	0.744994	1.14201	0.00202608	Col4a5	collagen, type IV, alpha 5 [Source:MGI Symbol;Acc:MGI:88456]	141475385	141689234	4
ENSMUSG00000078779	-0.015612	0.965635	0.636082	0.00202608	Zfp59	zinc finger protein 59 [Source:MGI Symbol;Acc:MGI:99206]	27838607	27856438	2
ENSMUSG00000024507	-0.0534386	0.695832	0.287	0.00202608	Hsd17b4	hydroxysteroid (17-beta) dehydrogenase 4 [Source:MGI Symbol;Acc:MGI:105089]	50128201	50196269	4
ENSMUSG00000003948	0.326331	0.254883	0.691958	0.00202727	Mmd	monocyte to macrophage differentiation-associated [Source:MGI Symbol;Acc:MGI:1914718]	90249456	90278589	2
ENSMUSG00000031755	0.054595	0.866676	0.620804	0.00202727	Bbs2	Bardet-Biedl syndrome 2 (human) [Source:MGI Symbol;Acc:MGI:2135267]	94067954	94098928	3
ENSMUSG00000005413	-0.405642	0.3223	-0.966135	0.00202727	Hmox1	heme oxygenase 1 [Source:MGI Symbol;Acc:MGI:96163]	75093621	75100589	2
ENSMUSG00000056073	0.314276	0.511474	1.23434	0.0020295	Grik2	glutamate receptor, ionotropic, kainate 2 (beta 2) [Source:MGI Symbol;Acc:MGI:95815]	49094833	49788766	11
ENSMUSG00000094840	0.0369544	0.946511	0.965972	0.00202953	Muc3a	mucin 3A, cell surface associated [Source:MGI Symbol;Acc:MGI:3588263]	137208813	137212389	2
ENSMUSG00000032013	-0.0833852	0.922546	-1.49651	0.00202953	Trim29	tripartite motif-containing 29 [Source:MGI Symbol;Acc:MGI:1919419]	43310848	43336115	3
ENSMUSG00000025515	0.0659697	0.898094	0.936202	0.00202988	Muc2	mucin 2 [Source:MGI Symbol;Acc:MGI:1339364]	141690340	141754693	8
ENSMUSG00000048503	0.611558	0.202947	1.23149	0.0020327	Tmem136	transmembrane protein 136 [Source:MGI Symbol;Acc:MGI:2685030]	43108650	43116570	4
ENSMUSG00000020866	0.394605	0.359015	1.02765	0.00203437	Cacna1g	calcium channel, voltage-dependent, T type, alpha 1G subunit [Source:MGI Symbol;Acc:MGI:1201678]	94408391	94474198	16
ENSMUSG00000022228	0.176594	0.316276	0.418345	0.00203984	Zscan26	zinc finger and SCAN domain containing 26 [Source:MGI Symbol;Acc:MGI:3531417]	21442180	21453730	2
ENSMUSG00000027952	-0.237759	0.562823	-0.903859	0.0020482	Pmvk	phosphomevalonate kinase [Source:MGI Symbol;Acc:MGI:1915853]	89454541	89469013	4
ENSMUSG00000028582	-0.141934	0.248727	-0.297178	0.00205922	Cc2d1b	coiled-coil and C2 domain containing 1B [Source:MGI Symbol;Acc:MGI:2443076]	108619940	108634123	9
ENSMUSG00000079419	0.33457	0.369693	-0.867201	0.00206434	Ms4a6c	membrane-spanning 4-domains, subfamily A, member 6C [Source:MGI Symbol;Acc:MGI:2385644]	11469366	11482192	2
ENSMUSG00000002699	0.125067	0.79847	-0.948167	0.0020684	Lcp2	lymphocyte cytosolic protein 2 [Source:MGI Symbol;Acc:MGI:1321402]	34046920	34092295	4
ENSMUSG00000041417	-0.0966181	0.62951	0.429025	0.00207411	Pik3r1	phosphoinositide-3-kinase regulatory subunit 1 [Source:MGI Symbol;Acc:MGI:97583]	101680563	101768217	7
ENSMUSG00000033740	0.121767	0.885806	1.66001	0.00208029	St18	suppression of tumorigenicity 18 [Source:MGI Symbol;Acc:MGI:2446700]	6487231	6860940	13
ENSMUSG00000040511	-0.0897562	0.749479	-0.55913	0.00208064	Pvr	poliovirus receptor [Source:MGI Symbol;Acc:MGI:107741]	19903578	19921160	5
ENSMUSG00000018425	0.0475572	0.725903	0.280026	0.00208194	Dhx40	DEAH (Asp-Glu-Ala-His) box polypeptide 40 [Source:MGI Symbol;Acc:MGI:1914737]	86768846	86807746	4
ENSMUSG00000115100	0.341031	0.56076	1.47313	0.00208767	Gm34934	predicted gene, 34934 [Source:MGI Symbol;Acc:MGI:5594093]	46866576	46882757	3
ENSMUSG00000031667	-0.0110104	0.947299	0.294661	0.00209027	Aktip	thymoma viral proto-oncogene 1 interacting protein [Source:MGI Symbol;Acc:MGI:3693832]	91111784	91199976	13
ENSMUSG00000097494	0.376514	0.530186	1.41877	0.00209027	4933406C10Rik	RIKEN cDNA 4933406C10 gene [Source:MGI Symbol;Acc:MGI:1921326]	32919384	32953789	2
ENSMUSG00000032436	0.0923347	0.669103	-0.451141	0.00209027	Cmtm7	CKLF-like MARVEL transmembrane domain containing 7 [Source:MGI Symbol;Acc:MGI:2447166]	114756836	114781856	5
ENSMUSG00000021213	0.460959	0.0208369	0.515875	0.00209198	Akr1c13	aldo-keto reductase family 1, member C13 [Source:MGI Symbol;Acc:MGI:1351662]	4191150	4205596	3
ENSMUSG00000030087	0.286552	0.729263	1.71117	0.00209342	Klf15	Kruppel-like factor 15 [Source:MGI Symbol;Acc:MGI:1929988]	90462576	90475238	5
ENSMUSG00000094910	0.0349303	0.95441	1.13652	0.00209874	D430019H16Rik	RIKEN cDNA D430019H16 gene [Source:MGI Symbol;Acc:MGI:2443127]	105453856	105493095	1
ENSMUSG00000034799	-0.010375	0.975676	-0.547407	0.00210039	Unc13a	unc-13 homolog A [Source:MGI Symbol;Acc:MGI:3051532]	71624417	71671757	8
ENSMUSG00000006373	0.00477906	0.981923	0.33232	0.00210182	Pgrmc1	progesterone receptor membrane component 1 [Source:MGI Symbol;Acc:MGI:1858305]	36598206	36606079	1
ENSMUSG00000037029	-0.0763566	0.781156	0.539371	0.00210182	Zfp146	zinc finger protein 146 [Source:MGI Symbol;Acc:MGI:1347092]	30161269	30169750	3
ENSMUSG00000004098	0.140013	0.820858	1.17822	0.00211441	Col5a3	collagen, type V, alpha 3 [Source:MGI Symbol;Acc:MGI:1858212]	20770050	20815067	2
ENSMUSG00000055675	0.246138	0.654058	1.16201	0.00211976	Kbtbd11	kelch repeat and BTB (POZ) domain containing 11 [Source:MGI Symbol;Acc:MGI:1922151]	15011025	15033333	4
ENSMUSG00000055305	-0.11607	0.670363	0.601897	0.00212419	Zfp93	zinc finger protein 93 [Source:MGI Symbol;Acc:MGI:107611]	24270420	24277794	3
ENSMUSG00000020140	0.318111	0.372084	0.864547	0.00212419	Lgr5	leucine rich repeat containing G protein coupled receptor 5 [Source:MGI Symbol;Acc:MGI:1341817]	115450311	115587780	8
ENSMUSG00000004085	0.00537235	0.98624	0.510669	0.00212599	Map3k20	mitogen-activated protein kinase kinase kinase 20 [Source:MGI Symbol;Acc:MGI:2443258]	72285637	72442610	6
ENSMUSG00000097391	0.383377	0.485189	1.31642	0.00212787	Mirg	miRNA containing gene [Source:MGI Symbol;Acc:MGI:3781106]	109729764	109749460	12
ENSMUSG00000030595	-0.138948	0.601227	-0.573243	0.0021306	Nfkbib	nuclear factor of kappa light polypeptide gene enhancer in B cells inhibitor, beta [Source:MGI Symbol;Acc:MGI:104752]	28758251	28767512	3
ENSMUSG00000022474	0.00367128	0.9884	-0.431293	0.00213492	Pmm1	phosphomannomutase 1 [Source:MGI Symbol;Acc:MGI:1353418]	81951108	81960930	11
ENSMUSG00000028772	-0.157747	0.306758	-0.365259	0.00213492	Zcchc17	zinc finger, CCHC domain containing 17 [Source:MGI Symbol;Acc:MGI:1919955]	130315383	130359943	5
ENSMUSG00000038042	0.390603	0.364212	1.02965	0.00213597	Ptpdc1	protein tyrosine phosphatase domain containing 1 [Source:MGI Symbol;Acc:MGI:2145430]	48577872	48625664	5
ENSMUSG00000004937	-0.170346	0.341586	-0.418422	0.00213597	Sgta	small glutamine-rich tetratricopeptide repeat (TPR)-containing, alpha [Source:MGI Symbol;Acc:MGI:1098703]	81044075	81060181	7
ENSMUSG00000025582	-0.289828	0.748955	1.95595	0.0021404	Nptx1	neuronal pentraxin 1 [Source:MGI Symbol;Acc:MGI:107811]	119538719	119547753	1
ENSMUSG00000036560	0.142352	0.792066	1.08345	0.0021429	Lgi4	leucine-rich repeat LGI family, member 4 [Source:MGI Symbol;Acc:MGI:2180197]	31059342	31070935	4
ENSMUSG00000038193	0.447522	0.201175	0.854199	0.00215226	Hand2	heart and neural crest derivatives expressed 2 [Source:MGI Symbol;Acc:MGI:103580]	57320983	57324633	1
ENSMUSG00000029275	0.168127	0.65231	0.797988	0.00215226	Gfi1	growth factor independent 1 transcription repressor [Source:MGI Symbol;Acc:MGI:103170]	107716657	107726036	4
ENSMUSG00000029913	0.272931	0.374131	0.756489	0.00215226	Prdm5	PR domain containing 5 [Source:MGI Symbol;Acc:MGI:1918029]	65778988	65937010	7
ENSMUSG00000025255	0.354166	0.426124	1.03224	0.00215249	Zfhx4	zinc finger homeodomain 4 [Source:MGI Symbol;Acc:MGI:2137668]	5218526	5415857	5
ENSMUSG00000024206	0.151708	0.787898	1.11143	0.00215818	Rfx2	regulatory factor X, 2 (influences HLA class II expression) [Source:MGI Symbol;Acc:MGI:106583]	56775897	56831013	5
ENSMUSG00000109244	0.188991	0.500919	-0.624843	0.00215842	Gm44751	predicted gene 44751 [Source:MGI Symbol;Acc:MGI:5753327]	88311478	88315864	1
ENSMUSG00000090799	0.644467	0.132062	1.07671	0.00216752	Klhl33	kelch-like 33 [Source:MGI Symbol;Acc:MGI:3644593]	50888582	50897507	4
ENSMUSG00000097324	0.376239	0.58766	1.51199	0.00217014	Carmn	cardiac mesoderm enhancer-associated non-coding RNA [Source:MGI Symbol;Acc:MGI:4439832]	61649625	61665537	2
ENSMUSG00000025212	0.0168993	0.967768	0.703761	0.00217014	Sfxn3	sideroflexin 3 [Source:MGI Symbol;Acc:MGI:2137679]	45047503	45056383	6
ENSMUSG00000038312	-0.247766	0.246547	-0.51247	0.00217033	Edem2	ER degradation enhancer, mannosidase alpha-like 2 [Source:MGI Symbol;Acc:MGI:1915540]	155701677	155729475	4
ENSMUSG00000037548	-0.0895239	0.866476	-0.985367	0.00217157	H2-DMb2	histocompatibility 2, class II, locus Mb2 [Source:MGI Symbol;Acc:MGI:95923]	34143307	34151555	3
ENSMUSG00000027356	-0.253389	0.0359666	0.30833	0.00217514	Fermt1	fermitin family member 1 [Source:MGI Symbol;Acc:MGI:2443583]	132904389	132945906	4
ENSMUSG00000025491	0.178684	0.622676	-0.773295	0.00217514	Ifitm1	interferon induced transmembrane protein 1 [Source:MGI Symbol;Acc:MGI:1915963]	140967221	140969825	3
ENSMUSG00000083773	-0.453917	0.106553	-0.702604	0.00217514	Gm13394	predicted gene 13394 [Source:MGI Symbol;Acc:MGI:3651848]	28933610	28934609	1
ENSMUSG00000078622	-0.0718071	0.564893	0.274421	0.00217617	Ccdc47	coiled-coil domain containing 47 [Source:MGI Symbol;Acc:MGI:1914413]	106197408	106216344	5
ENSMUSG00000103711	0.437097	0.050249	0.565604	0.00217732	Tstd1	thiosulfate sulfurtransferase (rhodanese)-like domain containing 1 [Source:MGI Symbol;Acc:MGI:3648482]	171418872	171420352	3
ENSMUSG00000043518	-0.00186713	0.99755	0.95536	0.0021812	Rai2	retinoic acid induced 2 [Source:MGI Symbol;Acc:MGI:1344378]	161717069	161779496	2
ENSMUSG00000029082	-0.0966111	0.864223	-1.04655	0.00218134	Bst1	bone marrow stromal cell antigen 1 [Source:MGI Symbol;Acc:MGI:105370]	43818885	43843986	4
ENSMUSG00000028047	0.22755	0.56557	0.874321	0.00218544	Thbs3	thrombospondin 3 [Source:MGI Symbol;Acc:MGI:98739]	89215180	89226837	11
ENSMUSG00000027568	0.862029	0.137506	1.53488	0.00218544	Ntsr1	neurotensin receptor 1 [Source:MGI Symbol;Acc:MGI:97386]	180499976	180544980	2
ENSMUSG00000110266	0.503227	0.338003	1.2732	0.00218983	Gm32742	predicted gene, 32742 [Source:MGI Symbol;Acc:MGI:5591901]	51130307	51165517	1
ENSMUSG00000092200	0.330939	0.522324	1.17155	0.00219815	Tnxa	tenascin XA (pseudogene) [Source:MGI Symbol;Acc:MGI:2148489]	34771395	34801623	1
ENSMUSG00000046449	0.246976	0.838642	2.51259	0.00219815	Nexmif	neurite extension and migration factor [Source:MGI Symbol;Acc:MGI:2148050]	104077434	104201185	3
ENSMUSG00000020090			2.9581	0.00219815	Npffr1	neuropeptide FF receptor 1 [Source:MGI Symbol;Acc:MGI:2685082]	61595492	61628565	1
ENSMUSG00000097504	0.177238	0.632856	0.839167	0.00220171	4930516B21Rik	RIKEN cDNA 4930516B21 gene [Source:MGI Symbol;Acc:MGI:1922364]	119440278	119444830	1
ENSMUSG00000026421	0.219664	0.431274	0.637992	0.00220171	Csrp1	cysteine and glycine-rich protein 1 [Source:MGI Symbol;Acc:MGI:88549]	135720061	135752232	2
ENSMUSG00000061132	-0.222246	0.373329	-0.579131	0.00220171	Blnk	B cell linker [Source:MGI Symbol;Acc:MGI:96878]	40928927	40994535	3
ENSMUSG00000022708	0.21317	0.633484	0.949943	0.00220437	Zbtb20	zinc finger and BTB domain containing 20 [Source:MGI Symbol;Acc:MGI:1929213]	42875881	43642602	21
ENSMUSG00000029007	-0.262072	0.246633	-0.541299	0.00220437	Agtrap	angiotensin II, type I receptor-associated protein [Source:MGI Symbol;Acc:MGI:1339977]	148077061	148088031	3
ENSMUSG00000026254	-0.305853	0.0245644	-0.350146	0.00220437	Eif4e2	eukaryotic translation initiation factor 4E member 2 [Source:MGI Symbol;Acc:MGI:1914440]	87213914	87240488	8
ENSMUSG00000019188	0.00218042	0.995953	-0.658736	0.00220764	H13	histocompatibility 13 [Source:MGI Symbol;Acc:MGI:95886]	152669461	152708670	6
ENSMUSG00000029307	-0.264051	0.793375	2.2068	0.00221613	Dmp1	dentin matrix protein 1 [Source:MGI Symbol;Acc:MGI:94910]	104202613	104214102	1
ENSMUSG00000045414	-0.110695	0.643187	0.508392	0.00221661	1190002N15Rik	RIKEN cDNA 1190002N15 gene [Source:MGI Symbol;Acc:MGI:1916111]	94517864	94538081	1
ENSMUSG00000036986	-0.0660022	0.697038	-0.350548	0.00221661	Pml	promyelocytic leukemia [Source:MGI Symbol;Acc:MGI:104662]	58218076	58249786	12
ENSMUSG00000034910	0.468598	0.304313	1.10335	0.00221868	Pygo1	pygopus 1 [Source:MGI Symbol;Acc:MGI:1919385]	72925645	72952181	1
ENSMUSG00000033933	-0.115257	0.27766	-0.252971	0.00222131	Vhl	von Hippel-Lindau tumor suppressor [Source:MGI Symbol;Acc:MGI:103223]	113623959	113631633	4
ENSMUSG00000023243	-0.204389	0.570763	0.788207	0.00222478	Kcnk5	potassium channel, subfamily K, member 5 [Source:MGI Symbol;Acc:MGI:1336175]	20140057	20181809	2
ENSMUSG00000029797	0.0959985	0.898693	1.36604	0.00222481	Sspo	SCO-spondin [Source:MGI Symbol;Acc:MGI:2674311]	48448229	48501250	6
ENSMUSG00000081221	-0.500531	0.0527509	-0.656244	0.00223925	Gm14760	predicted gene 14760 [Source:MGI Symbol;Acc:MGI:3709612]	80193854	80194852	1
ENSMUSG00000045912	-0.13643	0.845408	1.37622	0.00223925	C2cd4c	C2 calcium-dependent domain containing 4C [Source:MGI Symbol;Acc:MGI:2685084]	79606854	79614025	2
ENSMUSG00000031304	0.0268583	0.951253	-0.761405	0.00224405	Il2rg	interleukin 2 receptor, gamma chain [Source:MGI Symbol;Acc:MGI:96551]	101264378	101268255	4
ENSMUSG00000051726	-0.204192	0.768595	1.37161	0.002256	Kcnf1	potassium voltage-gated channel, subfamily F, member 1 [Source:MGI Symbol;Acc:MGI:2687399]	17172100	17176888	1
ENSMUSG00000002633			4.1647	0.00225798	Shh	sonic hedgehog [Source:MGI Symbol;Acc:MGI:98297]	28456815	28467256	1
ENSMUSG00000037111	0.167502	0.466856	0.520064	0.00225999	Setd7	SET domain containing (lysine methyltransferase) 7 [Source:MGI Symbol;Acc:MGI:1920501]	51515319	51560879	4
ENSMUSG00000039981	-0.251266	0.24689	-0.518404	0.00225999	Zc3h12d	zinc finger CCCH type containing 12D [Source:MGI Symbol;Acc:MGI:3045313]	7832470	7870396	1
ENSMUSG00000023266	0.261906	0.608663	1.13075	0.00226479	Frs3	fibroblast growth factor receptor substrate 3 [Source:MGI Symbol;Acc:MGI:2135965]	47689030	47704286	5
ENSMUSG00000026121	0.285146	0.166817	0.510288	0.00226755	Sema4c	sema domain, immunoglobulin domain (Ig), transmembrane domain (TM) and short cytoplasmic domain, (semaphorin) 4C [Source:MGI Symbol;Acc:MGI:109252]	36548639	36558349	8
ENSMUSG00000022434	0.288644	0.109675	0.45462	0.00226755	Fam118a	family with sequence similarity 118, member A [Source:MGI Symbol;Acc:MGI:1920475]	85028948	85062830	7
ENSMUSG00000022762	0.216346	0.777221	1.55729	0.00227074	Ncam2	neural cell adhesion molecule 2 [Source:MGI Symbol;Acc:MGI:97282]	81200697	81626828	4
ENSMUSG00000029608	0.737572	0.278006	2.00853	0.00227241	Rph3a	rabphilin 3A [Source:MGI Symbol;Acc:MGI:102788]	120940499	121010092	4
ENSMUSG00000044795	0.0805268	0.664821	0.40129	0.0022823	Cyb5d1	cytochrome b5 domain containing 1 [Source:MGI Symbol;Acc:MGI:2685586]	69391925	69395631	3
ENSMUSG00000025207	0.17392	0.581344	0.683143	0.00230677	Sema4g	sema domain, immunoglobulin domain (Ig), transmembrane domain (TM) and short cytoplasmic domain, (semaphorin) 4G [Source:MGI Symbol;Acc:MGI:1347047]	44989101	45003397	8
ENSMUSG00000025933	0.262246	0.358075	0.677174	0.00231751	Tmem14a	transmembrane protein 14A [Source:MGI Symbol;Acc:MGI:1922962]	21218575	21230167	2
ENSMUSG00000032679	0.408794	0.0812073	0.587746	0.00231909	Cd59a	CD59a antigen [Source:MGI Symbol;Acc:MGI:109177]	104095801	104115354	3
ENSMUSG00000035357	0.157711	0.753533	0.990995	0.00232234	Pdzrn3	PDZ domain containing RING finger 3 [Source:MGI Symbol;Acc:MGI:1933157]	101149609	101377897	4
ENSMUSG00000003345	-0.209345	0.141192	-0.34916	0.0023266	Csnk1g2	casein kinase 1, gamma 2 [Source:MGI Symbol;Acc:MGI:1920014]	80622838	80640749	8
ENSMUSG00000041272	0.0104984	0.982795	0.761347	0.00233171	Tox	thymocyte selection-associated high mobility group box [Source:MGI Symbol;Acc:MGI:2181659]	6686353	6991557	4
ENSMUSG00000056900	0.452187	0.261272	1.00965	0.00234819	Usp13	ubiquitin specific peptidase 13 (isopeptidase T-3) [Source:MGI Symbol;Acc:MGI:1919857]	32817546	32938071	4
ENSMUSG00000044548	0.323753	0.508818	1.10024	0.0023495	Dact1	dishevelled-binding antagonist of beta-catenin 1 [Source:MGI Symbol;Acc:MGI:1891740]	71309884	71320107	2
ENSMUSG00000029571	0.233664	0.232595	0.468428	0.00235362	Tmem106b	transmembrane protein 106B [Source:MGI Symbol;Acc:MGI:1919150]	13069759	13089269	6
ENSMUSG00000051527			2.30326	0.00235362	Usp29	ubiquitin specific peptidase 29 [Source:MGI Symbol;Acc:MGI:1888998]	6730578	6967219	9
ENSMUSG00000079477	-0.281071	0.0559456	-0.369432	0.00235362	Rab7	RAB7, member RAS oncogene family [Source:MGI Symbol;Acc:MGI:105068]	87999106	88045270	7
ENSMUSG00000034708	-0.245372	0.176872	-0.44064	0.00235362	Grn	granulin [Source:MGI Symbol;Acc:MGI:95832]	102430315	102437048	10
ENSMUSG00000028850	-0.13105	0.601227	-0.535781	0.00235492	Gpatch3	G patch domain containing 3 [Source:MGI Symbol;Acc:MGI:2442492]	133574745	133584243	2
ENSMUSG00000024737	0.0551212	0.91018	-0.855309	0.00235996	Slc15a3	solute carrier family 15, member 3 [Source:MGI Symbol;Acc:MGI:1929691]	10839727	10859362	4
ENSMUSG00000078794	0.387652	0.457322	1.17782	0.00236932	Dact3	dishevelled-binding antagonist of beta-catenin 3 [Source:MGI Symbol;Acc:MGI:3654828]	16875317	16887462	1
ENSMUSG00000041120	0.0642152	0.898858	0.907708	0.00237354	Nbl1	neuroblastoma, suppression of tumorigenicity 1 [Source:MGI Symbol;Acc:MGI:104591]	139082284	139092993	3
ENSMUSG00000038119	0.0240658	0.935117	0.512192	0.00238988	Cdon	cell adhesion molecule-related/down-regulated by oncogenes [Source:MGI Symbol;Acc:MGI:1926387]	35421128	35507652	6
ENSMUSG00000034898	0.30587	0.423744	0.874655	0.00239517	Filip1	filamin A interacting protein 1 [Source:MGI Symbol;Acc:MGI:1917848]	79815051	80012851	4
ENSMUSG00000029075	0.206588	0.612905	-0.850691	0.00239695	Tnfrsf4	tumor necrosis factor receptor superfamily, member 4 [Source:MGI Symbol;Acc:MGI:104512]	156013843	156016612	3
ENSMUSG00000078763	-0.00060874	0.999286	-1.253	0.00240715	Slfn1	schlafen 1 [Source:MGI Symbol;Acc:MGI:1313259]	83116849	83122670	1
ENSMUSG00000060336	0.17045	0.537667	0.636197	0.00241916	Zfp937	zinc finger protein 937 [Source:MGI Symbol;Acc:MGI:3644476]	150218073	150240725	1
ENSMUSG00000020570	-0.0616177	0.695239	0.323156	0.00241944	Sypl	synaptophysin-like protein [Source:MGI Symbol;Acc:MGI:108081]	32953891	32979860	7
ENSMUSG00000054200	-0.237956	0.34703	0.590927	0.00241944	Ffar4	free fatty acid receptor 4 [Source:MGI Symbol;Acc:MGI:2147577]	38097071	38114263	1
ENSMUSG00000027589	0.0649863	0.839575	0.601426	0.00242922	Pcmtd2	protein-L-isoaspartate (D-aspartate) O-methyltransferase domain containing 2 [Source:MGI Symbol;Acc:MGI:1923927]	181837854	181857461	9
ENSMUSG00000097006	-0.096114	0.797059	-0.714284	0.00243005	9530082P21Rik	RIKEN cDNA 9530082P21 gene [Source:MGI Symbol;Acc:MGI:3603340]	23743234	23754065	3
ENSMUSG00000028048	-0.176374	0.390399	-0.47	0.00243005	Gba	glucosidase, beta, acid [Source:MGI Symbol;Acc:MGI:95665]	89202928	89208966	5
ENSMUSG00000057716	-0.0789449	0.920921	1.54022	0.00243301	Tmem178b	transmembrane protein 178B [Source:MGI Symbol;Acc:MGI:3647581]	39873271	40255150	3
ENSMUSG00000016128	-0.197477	0.435189	0.578269	0.00243672	Stard13	StAR-related lipid transfer (START) domain containing 13 [Source:MGI Symbol;Acc:MGI:2385331]	151037510	151233836	10
ENSMUSG00000004788	-0.240048	0.218368	-0.466181	0.00243672	Eif2b2	eukaryotic translation initiation factor 2B, subunit 2 beta [Source:MGI Symbol;Acc:MGI:2145118]	85219481	85226628	7
ENSMUSG00000051864	-0.311448	0.00686279	-0.300142	0.00244405	Tbc1d22a	TBC1 domain family, member 22a [Source:MGI Symbol;Acc:MGI:1289265]	86214459	86498503	2
ENSMUSG00000026509	-0.134932	0.592336	-0.539072	0.00246103	Capn2	calpain 2 [Source:MGI Symbol;Acc:MGI:88264]	182467260	182517608	5
ENSMUSG00000070720	0.344689	0.51814	1.18487	0.0024658	Tmem200b	transmembrane protein 200B [Source:MGI Symbol;Acc:MGI:3646343]	131921771	131923140	1
ENSMUSG00000062210	0.0258102	0.937823	-0.563483	0.00246638	Tnfaip8	tumor necrosis factor, alpha-induced protein 8 [Source:MGI Symbol;Acc:MGI:2147191]	49979427	50107173	13
ENSMUSG00000030317	-0.131202	0.847964	1.29663	0.00246676	Timp4	tissue inhibitor of metalloproteinase 4 [Source:MGI Symbol;Acc:MGI:109125]	115241892	115252205	2
ENSMUSG00000058135	-0.633594	0.225769	1.24785	0.00246736	Gstm1	glutathione S-transferase, mu 1 [Source:MGI Symbol;Acc:MGI:95860]	108012255	108017973	4
ENSMUSG00000018659	0.113124	0.613067	0.474624	0.00247812	Pnpo	pyridoxine 5'-phosphate oxidase [Source:MGI Symbol;Acc:MGI:2144151]	96937825	96943986	3
ENSMUSG00000030718	-0.33884	0.176985	-0.605994	0.00247812	Ppme1	protein phosphatase methylesterase 1 [Source:MGI Symbol;Acc:MGI:1919840]	100326737	100372307	5
ENSMUSG00000021947	-0.143305	0.683353	0.722517	0.00247974	Cryl1	crystallin, lambda 1 [Source:MGI Symbol;Acc:MGI:1915881]	57274993	57398529	4
ENSMUSG00000073295	0.469658	0.518571	1.72224	0.00248017	Nudt11	nudix (nucleoside diphosphate linked moiety X)-type motif 11 [Source:MGI Symbol;Acc:MGI:1930957]	6047453	6055110	1
ENSMUSG00000095937	-0.492907	0.0578343	-0.6525	0.00248166	Gm12671	predicted gene 12671 [Source:MGI Symbol;Acc:MGI:3651684]	91851668	91852669	1
ENSMUSG00000032366	0.0789409	0.751033	0.48662	0.00248433	Tpm1	tropomyosin 1, alpha [Source:MGI Symbol;Acc:MGI:98809]	67022590	67049406	21
ENSMUSG00000036985	-0.438972	0.0306632	-0.513039	0.0024874	Zdhhc9	zinc finger, DHHC domain containing 9 [Source:MGI Symbol;Acc:MGI:2444393]	48171969	48208878	6
ENSMUSG00000030306	0.222569	0.572623	0.856994	0.00248826	Tmtc1	transmembrane and tetratricopeptide repeat containing 1 [Source:MGI Symbol;Acc:MGI:3039590]	148232430	148444389	4
ENSMUSG00000041540	0.158347	0.654058	0.787522	0.00248861	Sox5	SRY (sex determining region Y)-box 5 [Source:MGI Symbol;Acc:MGI:98367]	143828425	144781977	14
ENSMUSG00000039976	-0.191153	0.73937	1.13728	0.00248959	Tbc1d16	TBC1 domain family, member 16 [Source:MGI Symbol;Acc:MGI:2652878]	119143045	119228499	3
ENSMUSG00000024121	-0.155373	0.442604	-0.455942	0.00249554	Atp6v0c	ATPase, H+ transporting, lysosomal V0 subunit C [Source:MGI Symbol;Acc:MGI:88116]	24163866	24169702	6
ENSMUSG00000078247	0.291472	0.542963	1.0654	0.00250163	Airn	antisense Igf2r RNA [Source:MGI Symbol;Acc:MGI:1353471]	12741311	12860136	6
ENSMUSG00000039515	-0.189502	0.290531	-0.418235	0.00250493	Ptpa	protein phosphatase 2 protein activator [Source:MGI Symbol;Acc:MGI:1346006]	30416039	30447806	13
ENSMUSG00000002996	0.156139	0.637461	0.69611	0.00250493	Hbp1	high mobility group box transcription factor 1 [Source:MGI Symbol;Acc:MGI:894659]	31926254	31950535	9
ENSMUSG00000033209	0.0659602	0.911241	1.04396	0.00250535	Ttc28	tetratricopeptide repeat domain 28 [Source:MGI Symbol;Acc:MGI:2140873]	110879803	111289780	6
ENSMUSG00000029581	-0.16268	0.728752	-0.929346	0.00250643	Fscn1	fascin actin-bundling protein 1 [Source:MGI Symbol;Acc:MGI:1352745]	142960343	142973185	7
ENSMUSG00000020814	0.135566	0.698426	0.72071	0.00250748	Mxra7	matrix-remodelling associated 7 [Source:MGI Symbol;Acc:MGI:1914872]	116803062	116828046	3
ENSMUSG00000069835	0.434689	0.127841	0.723125	0.00251913	Sat2	spermidine/spermine N1-acetyl transferase 2 [Source:MGI Symbol;Acc:MGI:1916465]	69622024	69623870	3
ENSMUSG00000035969	0.20944	0.735695	1.22787	0.0025201	Rusc2	RUN and SH3 domain containing 2 [Source:MGI Symbol;Acc:MGI:2140371]	43381979	43427088	18
ENSMUSG00000040148	-0.255547	0.773538	2.10806	0.0025201	Hmx3	H6 homeobox 3 [Source:MGI Symbol;Acc:MGI:107160]	131542867	131544925	1
ENSMUSG00000057789	-0.400822	0.226348	-0.787594	0.0025201	Bak1	BCL2-antagonist/killer 1 [Source:MGI Symbol;Acc:MGI:1097161]	27019810	27029009	4
ENSMUSG00000006586	0.20627	0.74197	1.25698	0.0025201	Runx1t1	RUNX1 translocation partner 1 [Source:MGI Symbol;Acc:MGI:104793]	13743436	13893649	6
ENSMUSG00000078965	-0.391275	0.219321	-0.7583	0.0025201	Gm12033	predicted gene 12033 [Source:MGI Symbol;Acc:MGI:3650772]	20335012	20336013	1
ENSMUSG00000030850	0.0522317	0.724516	0.298021	0.00252654	Ate1	arginyltransferase 1 [Source:MGI Symbol;Acc:MGI:1333870]	130391493	130520369	8
ENSMUSG00000008855	-0.0407218	0.922419	0.723637	0.00252856	Hdac5	histone deacetylase 5 [Source:MGI Symbol;Acc:MGI:1333784]	102194432	102230166	20
ENSMUSG00000034911	0.5259	0.0863542	0.76886	0.0025292	Ushbp1	USH1 protein network component harmonin binding protein 1 [Source:MGI Symbol;Acc:MGI:1922920]	71384272	71395802	5
ENSMUSG00000035561	-0.510103	0.0876321	0.740499	0.00253015	Aldh1b1	aldehyde dehydrogenase 1 family, member B1 [Source:MGI Symbol;Acc:MGI:1919785]	45799022	45804604	2
ENSMUSG00000071068	-0.195649	0.755402	-1.21184	0.00253223	Treml2	triggering receptor expressed on myeloid cells-like 2 [Source:MGI Symbol;Acc:MGI:2147038]	48299498	48312533	4
ENSMUSG00000017774	-0.202594	0.2521	-0.417526	0.00253863	Myo1c	myosin IC [Source:MGI Symbol;Acc:MGI:106612]	75650504	75673910	10
ENSMUSG00000030125	0.585344	0.564582	2.48146	0.00253863	Lrrc23	leucine rich repeat containing 23 [Source:MGI Symbol;Acc:MGI:1315192]	124769863	124779727	5
ENSMUSG00000095042	-0.503212	0.0480601	-0.639419	0.00255	Gm12537	predicted gene 12537 [Source:MGI Symbol;Acc:MGI:3650720]	57370953	57371954	1
ENSMUSG00000032869	-0.36135	0.0023098	-0.30891	0.00255197	Psmf1	proteasome (prosome, macropain) inhibitor subunit 1 [Source:MGI Symbol;Acc:MGI:1346072]	151715812	151744186	6
ENSMUSG00000025813	0.0835369	0.86338	0.892523	0.00255229	Homer2	homer scaffolding protein 2 [Source:MGI Symbol;Acc:MGI:1347354]	81600481	81707527	9
ENSMUSG00000039100	0.0105333	0.946318	0.269822	0.00255229	2019-03-06	membrane-associated ring finger (C3HC4) 6 [Source:MGI Symbol;Acc:MGI:2442773]	31455891	31531053	4
ENSMUSG00000027254	0.151559	0.642249	0.687197	0.00255229	Map1a	microtubule-associated protein 1 A [Source:MGI Symbol;Acc:MGI:1306776]	121289600	121310832	4
ENSMUSG00000094162			-1.51765	0.00255868	Ccl19-ps3	chemokine (C-C motif) ligand 19, pseudogene 3 [Source:MGI Symbol;Acc:MGI:1891391]	42132559	42134171	1
ENSMUSG00000037610	0.3093	0.752346	2.10419	0.00256062	Kcnmb2	potassium large conductance calcium-activated channel, subfamily M, beta member 2 [Source:MGI Symbol;Acc:MGI:1919663]	31902507	32200180	6
ENSMUSG00000026536	-0.176453	0.760495	-1.11956	0.00256062	Ifi211	interferon activated gene 211 [Source:MGI Symbol;Acc:MGI:3041120]	173896345	173913046	1
ENSMUSG00000027706	-0.0157995	0.948324	0.416366	0.00256403	Sec62	SEC62 homolog (S. cerevisiae) [Source:MGI Symbol;Acc:MGI:1916526]	30792875	30821263	3
ENSMUSG00000031273	-0.122204	0.880946	1.49675	0.00256403	Col4a6	collagen, type IV, alpha 6 [Source:MGI Symbol;Acc:MGI:2152695]	141165403	141474076	3
ENSMUSG00000030842	-0.00928562	0.970174	-0.404474	0.00256403	Lamtor1	late endosomal/lysosomal adaptor, MAPK and MTOR activator 1 [Source:MGI Symbol;Acc:MGI:1913758]	101905904	101926675	3
ENSMUSG00000085870	0.264537	0.589094	1.07972	0.00256403	Gm12829	predicted gene 12829 [Source:MGI Symbol;Acc:MGI:3650003]	114680804	114687595	1
ENSMUSG00000040624	0.00725355	0.989336	0.910689	0.00256403	Plekhg1	pleckstrin homology domain containing, family G (with RhoGef domain) member 1 [Source:MGI Symbol;Acc:MGI:2676551]	3740364	3967303	8
ENSMUSG00000067656			4.43061	0.00256403	Slc22a27	solute carrier family 22, member 27 [Source:MGI Symbol;Acc:MGI:3042283]	7864388	7966027	2
ENSMUSG00000024397	0.306351	0.413592	-0.846116	0.00256915	Aif1	allograft inflammatory factor 1 [Source:MGI Symbol;Acc:MGI:1343098]	35170991	35176068	7
ENSMUSG00000104083	-0.662312	0.0950899	-0.983059	0.00256998	Gm29739	predicted gene, 29739 [Source:MGI Symbol;Acc:MGI:5588898]	43764236	43764764	1
ENSMUSG00000049119	0.353252	0.42681	1.03385	0.00257389	Fam110b	family with sequence similarity 110, member B [Source:MGI Symbol;Acc:MGI:1916593]	5644090	6108223	9
ENSMUSG00000055013	-0.225369	0.446848	0.666656	0.00257641	Agap1	ArfGAP with GTPase domain, ankyrin repeat and PH domain 1 [Source:MGI Symbol;Acc:MGI:2653690]	89454806	89897617	6
ENSMUSG00000049047	0.150328	0.469681	0.465884	0.00257641	Armcx3	armadillo repeat containing, X-linked 3 [Source:MGI Symbol;Acc:MGI:1918953]	134756595	134761455	3
ENSMUSG00000041653	0.724005	0.280079	1.60532	0.0025793	Pnpla3	patatin-like phospholipase domain containing 3 [Source:MGI Symbol;Acc:MGI:2151796]	84167837	84187236	2
ENSMUSG00000022003	-0.23687	0.209532	-0.451483	0.0025793	Slc25a30	solute carrier family 25, member 30 [Source:MGI Symbol;Acc:MGI:1914804]	75760117	75787037	6
ENSMUSG00000039699	-0.455222	0.376248	-1.1762	0.00258281	Batf2	basic leucine zipper transcription factor, ATF-like 2 [Source:MGI Symbol;Acc:MGI:1921731]	6140983	6172476	7
ENSMUSG00000021838	0.283934	0.451985	0.846961	0.00258281	Samd4	sterile alpha motif domain containing 4 [Source:MGI Symbol;Acc:MGI:1921730]	46882854	47105815	11
ENSMUSG00000039620	-0.0219519	0.968583	0.989524	0.00258281	Trmt9b	tRNA methyltransferase 9B [Source:MGI Symbol;Acc:MGI:2442328]	36457548	36516570	5
ENSMUSG00000033917	-0.00506936	0.993448	0.955233	0.00258473	Gde1	glycerophosphodiester phosphodiesterase 1 [Source:MGI Symbol;Acc:MGI:1891827]	118688545	118705778	4
ENSMUSG00000100862	0.486058	0.0519221	0.62304	0.00258473	Gm10925	predicted gene 10925 [Source:MGI Symbol;Acc:MGI:3809095]	24613974	24614651	1
ENSMUSG00000023885	0.270563	0.54619	0.980309	0.00258473	Thbs2	thrombospondin 2 [Source:MGI Symbol;Acc:MGI:98738]	14665500	14694235	2
ENSMUSG00000073412	0.264435	0.500487	-0.858106	0.00258473	Lst1	leukocyte specific transcript 1 [Source:MGI Symbol;Acc:MGI:1096324]	35185095	35188439	1
ENSMUSG00000034247	-0.119254	0.669657	-0.573199	0.00258473	Plekhm1	pleckstrin homology domain containing, family M (with RUN domain) member 1 [Source:MGI Symbol;Acc:MGI:2443207]	103364275	103412687	2
ENSMUSG00000002108	-0.0876257	0.628579	-0.379664	0.00258539	Nr1h3	nuclear receptor subfamily 1, group H, member 3 [Source:MGI Symbol;Acc:MGI:1352462]	91184061	91202834	8
ENSMUSG00000024172			3.6073	0.00258539	St6gal2	beta galactoside alpha 2,6 sialyltransferase 2 [Source:MGI Symbol;Acc:MGI:2445190]	55445382	55514581	4
ENSMUSG00000004462	-0.130598	0.525289	0.454393	0.0025874	Tbccd1	TBCC domain containing 1 [Source:MGI Symbol;Acc:MGI:1917823]	22813214	22857669	10
ENSMUSG00000025277	0.106816	0.581529	0.417493	0.0025874	Abhd6	abhydrolase domain containing 6 [Source:MGI Symbol;Acc:MGI:1913332]	8002902	8056763	3
ENSMUSG00000020793	0.659624	0.184698	1.22799	0.0025951	Galr2	galanin receptor 2 [Source:MGI Symbol;Acc:MGI:1337018]	116280939	116283938	2
ENSMUSG00000038508	-0.718861	0.156816	-1.22679	0.0025962	Gdf15	growth differentiation factor 15 [Source:MGI Symbol;Acc:MGI:1346047]	70629393	70632456	2
ENSMUSG00000031355	0.340778	0.396178	0.921089	0.00260869	Arhgap6	Rho GTPase activating protein 6 [Source:MGI Symbol;Acc:MGI:1196332]	168795099	169304435	7
ENSMUSG00000001334	-0.0758315	0.920832	1.32747	0.00260916	Fndc5	fibronectin type III domain containing 5 [Source:MGI Symbol;Acc:MGI:1917614]	129136999	129144593	1
ENSMUSG00000073684	-0.0632681	0.797747	-0.468838	0.00260916	Faap20	Fanconi anemia core complex associated protein 20 [Source:MGI Symbol;Acc:MGI:1914763]	155249802	155256687	10
ENSMUSG00000046460	-0.247757	0.758536	1.64106	0.00260966	Sh2d7	SH2 domain containing 7 [Source:MGI Symbol;Acc:MGI:2441692]	54538984	54545020	2
ENSMUSG00000000131	-0.230943	0.0436015	-0.2851	0.00261664	Xpo6	exportin 6 [Source:MGI Symbol;Acc:MGI:2429950]	126101715	126200501	20
ENSMUSG00000064357	0.487229	0.0506001	0.619974	0.002619	mt-Atp6	mitochondrially encoded ATP synthase 6 [Source:MGI Symbol;Acc:MGI:99927]	7927	8607	1
ENSMUSG00000033416	0.0663346	0.773538	0.441487	0.0026404	Gucd1	guanylyl cyclase domain containing 1 [Source:MGI Symbol;Acc:MGI:1916028]	75351111	75517972	11
ENSMUSG00000045664	-0.379019	0.46031	-1.14086	0.00264634	Cdc42ep2	CDC42 effector protein (Rho GTPase binding) 2 [Source:MGI Symbol;Acc:MGI:1929744]	5915636	5924816	1
ENSMUSG00000099974	0.337476	0.412858	-0.925817	0.00264929	Bcl2a1d	B cell leukemia/lymphoma 2 related protein A1d [Source:MGI Symbol;Acc:MGI:1278325]	88723285	88731914	1
ENSMUSG00000020283	0.271395	0.0149479	0.28501	0.00265272	Pex13	peroxisomal biogenesis factor 13 [Source:MGI Symbol;Acc:MGI:1919379]	23646479	23665959	4
ENSMUSG00000043998	-0.121808	0.393729	-0.324071	0.00265496	Mgat2	mannoside acetylglucosaminyltransferase 2 [Source:MGI Symbol;Acc:MGI:2384966]	69184157	69186770	1
ENSMUSG00000081665	0.190568	0.619874	-0.792117	0.00265812	Gm15922	predicted gene 15922 [Source:MGI Symbol;Acc:MGI:3802148]	3731630	3739889	1
ENSMUSG00000053907	0.249709	0.0566995	0.325366	0.00266607	Mat2a	methionine adenosyltransferase II, alpha [Source:MGI Symbol;Acc:MGI:2443731]	72432799	72439558	10
ENSMUSG00000094441	0.235148	0.339867	0.568791	0.00266607	Zfp955a	zinc finger protein 955A [Source:MGI Symbol;Acc:MGI:4834570]	33239718	33255145	1
ENSMUSG00000054863	0.182963	0.789791	1.34778	0.00267147	Fam19a5	family with sequence similarity 19, member A5 [Source:MGI Symbol;Acc:MGI:2146182]	87544299	87759364	2
ENSMUSG00000095362	0.531327	0.0466157	0.669713	0.00267391	Gm14325	predicted gene 14325 [Source:MGI Symbol;Acc:MGI:3702875]	177831791	177840336	3
ENSMUSG00000028517	-0.0803477	0.872076	0.910846	0.00267919	Plpp3	phospholipid phosphatase 3 [Source:MGI Symbol;Acc:MGI:1915166]	105157347	105232764	1
ENSMUSG00000034949	0.250379	0.48789	0.807286	0.00268116	Zfr2	zinc finger RNA binding protein 2 [Source:MGI Symbol;Acc:MGI:2143792]	81233155	81252123	7
ENSMUSG00000078636	-0.522176	0.0412062	-0.637751	0.00268584	Gm7336	predicted gene 7336 [Source:MGI Symbol;Acc:MGI:3644851]	51746647	51747878	1
ENSMUSG00000019944	0.0832291	0.860958	0.874118	0.00268765	Rhobtb1	Rho-related BTB domain containing 1 [Source:MGI Symbol;Acc:MGI:1916538]	69151434	69291791	13
ENSMUSG00000073411	-0.0675838	0.854322	-0.675844	0.00268765	H2-D1	histocompatibility 2, D region locus 1 [Source:MGI Symbol;Acc:MGI:95896]	35262730	35267499	4
ENSMUSG00000017943	-0.188731	0.828491	1.84579	0.00268765	Gdap1l1	ganglioside-induced differentiation-associated protein 1-like 1 [Source:MGI Symbol;Acc:MGI:2385163]	163438476	163455324	4
ENSMUSG00000028949	0.43867	0.171109	0.77618	0.00269203	Smarcd3	SWI/SNF related, matrix associated, actin dependent regulator of chromatin, subfamily d, member 3 [Source:MGI Symbol;Acc:MGI:1914243]	24590818	24624411	9
ENSMUSG00000083012	-0.298188	0.23278	-0.589215	0.00270438	Fam220a	family with sequence similarity 220, member A [Source:MGI Symbol;Acc:MGI:1914488]	143548708	143564531	4
ENSMUSG00000001418	-0.231388	0.140504	-0.379812	0.00270438	Glmp	glycosylated lysosomal membrane protein [Source:MGI Symbol;Acc:MGI:1913318]	88325023	88331313	10
ENSMUSG00000020123	-0.00176028	0.998165	1.23951	0.00270438	Avpr1a	arginine vasopressin receptor 1A [Source:MGI Symbol;Acc:MGI:1859216]	122448499	122453452	1
ENSMUSG00000035596	-0.302055	0.0318318	-0.352078	0.00270438	Mboat7	membrane bound O-acyltransferase domain containing 7 [Source:MGI Symbol;Acc:MGI:1924832]	3677789	3693523	13
ENSMUSG00000017390	-0.29364	0.394408	-0.779964	0.00270438	Aldoc	aldolase C, fructose-bisphosphate [Source:MGI Symbol;Acc:MGI:101863]	78322968	78327781	6
ENSMUSG00000030554	0.233884	0.563039	0.866729	0.00271116	Synm	synemin, intermediate filament protein [Source:MGI Symbol;Acc:MGI:2661187]	67730160	67759742	5
ENSMUSG00000031662	0.110073	0.767401	-0.712862	0.00271157	Snx20	sorting nexin 20 [Source:MGI Symbol;Acc:MGI:1918857]	88626563	88636128	2
ENSMUSG00000015944	0.326098	0.424608	0.921995	0.00271355	Castor2	cytosolic arginine sensor for mTORC1 subunit 2 [Source:MGI Symbol;Acc:MGI:1933384]	134099711	134144343	3
ENSMUSG00000035042	-0.252982	0.633946	-1.10215	0.002714	Ccl5	chemokine (C-C motif) ligand 5 [Source:MGI Symbol;Acc:MGI:98262]	83525778	83530518	2
ENSMUSG00000051065	-0.167952	0.604837	-0.681998	0.00271581	Mb21d2	Mab-21 domain containing 2 [Source:MGI Symbol;Acc:MGI:1917028]	28826176	28929673	2
ENSMUSG00000034422	-0.226326	0.431274	-0.643848	0.0027296	Parp14	poly (ADP-ribose) polymerase family, member 14 [Source:MGI Symbol;Acc:MGI:1919489]	35832874	35871544	3
ENSMUSG00000108358	0.531264	0.140179	0.90683	0.00273952	Gm44509	predicted gene 44509 [Source:MGI Symbol;Acc:MGI:5753085]	55973519	55974842	1
ENSMUSG00000030474	0.11703	0.799471	-0.855441	0.00274139	Siglece	sialic acid binding Ig-like lectin E [Source:MGI Symbol;Acc:MGI:1932475]	43651070	43660161	2
ENSMUSG00000007041	-0.185074	0.539394	-0.653267	0.0027418	Clic1	chloride intracellular channel 1 [Source:MGI Symbol;Acc:MGI:2148924]	35049966	35058749	2
ENSMUSG00000001847	-0.237298	0.279097	-0.508716	0.00274303	Rac1	Rac family small GTPase 1 [Source:MGI Symbol;Acc:MGI:97845]	143503634	143528036	4
ENSMUSG00000056899	0.36517	0.215358	0.703702	0.00276269	Immp2l	IMP2 inner mitochondrial membrane peptidase-like (S. cerevisiae) [Source:MGI Symbol;Acc:MGI:2135611]	41024090	41955588	5
ENSMUSG00000004038	-0.596339	0.19437	1.09919	0.00276379	Gstm3	glutathione S-transferase, mu 3 [Source:MGI Symbol;Acc:MGI:106026]	107963696	107969283	1
ENSMUSG00000019841	-0.0568716	0.851393	0.559363	0.00277061	Rev3l	REV3 like, DNA directed polymerase zeta catalytic subunit [Source:MGI Symbol;Acc:MGI:1337131]	39732118	39875211	7
ENSMUSG00000017817	0.175767	0.685941	0.882058	0.00277515	Jph2	junctophilin 2 [Source:MGI Symbol;Acc:MGI:1891496]	163336242	163397993	2
ENSMUSG00000025314	-0.338519	0.0454001	-0.418513	0.00278567	Ptprj	protein tyrosine phosphatase, receptor type, J [Source:MGI Symbol;Acc:MGI:104574]	90429754	90580647	4
ENSMUSG00000064193	-0.45908	0.122776	-0.720162	0.00278909	Gm4735	predicted gene 4735 [Source:MGI Symbol;Acc:MGI:3645521]	80837141	80838442	1
ENSMUSG00000030772	-0.0100314	0.983508	0.73751	0.0027913	Dkk3	dickkopf WNT signaling pathway inhibitor 3 [Source:MGI Symbol;Acc:MGI:1354952]	112116017	112159057	1
ENSMUSG00000042349	0.00715585	0.97762	-0.405153	0.0027913	Ikbke	inhibitor of kappaB kinase epsilon [Source:MGI Symbol;Acc:MGI:1929612]	131254343	131279606	7
ENSMUSG00000026796	-0.489517	0.0739041	-0.672299	0.00279204	Fam129b	family with sequence similarity 129, member B [Source:MGI Symbol;Acc:MGI:2442910]	32876114	32925254	6
ENSMUSG00000023046	0.90575	0.00960776	0.892234	0.00279413	Igfbp6	insulin-like growth factor binding protein 6 [Source:MGI Symbol;Acc:MGI:96441]	102144362	102149511	1
ENSMUSG00000021027	0.00494316	0.976643	0.268318	0.00279566	Ralgapa1	Ral GTPase activating protein, alpha subunit 1 [Source:MGI Symbol;Acc:MGI:1931050]	55602896	55821167	12
ENSMUSG00000061666	-0.340967	0.26455	0.711957	0.00280049	Gdpd1	glycerophosphodiester phosphodiesterase domain containing 1 [Source:MGI Symbol;Acc:MGI:1913819]	87033867	87074062	1
ENSMUSG00000038668	-0.00138918	0.997845	0.762295	0.00280669	Lpar1	lysophosphatidic acid receptor 1 [Source:MGI Symbol;Acc:MGI:108429]	58435255	58553898	8
ENSMUSG00000020572	-0.158665	0.592336	-0.625417	0.00280674	Nampt	nicotinamide phosphoribosyltransferase [Source:MGI Symbol;Acc:MGI:1929865]	32819545	32853349	3
ENSMUSG00000090150	-0.0314211	0.913649	0.501939	0.00281433	Acad11	acyl-Coenzyme A dehydrogenase family, member 11 [Source:MGI Symbol;Acc:MGI:2143169]	104063377	104127725	8
ENSMUSG00000038965	-0.200551	0.0883913	-0.288581	0.00282335	Ube2l3	ubiquitin-conjugating enzyme E2L 3 [Source:MGI Symbol;Acc:MGI:109240]	17152013	17202649	8
ENSMUSG00000032089	0.367214	0.132062	-0.585404	0.00282335	Il10ra	interleukin 10 receptor, alpha [Source:MGI Symbol;Acc:MGI:96538]	45253837	45269149	3
ENSMUSG00000067430	0.20236	0.453775	0.614039	0.00282682	Zfp763	zinc finger protein 763 [Source:MGI Symbol;Acc:MGI:1920701]	33016863	33033402	2
ENSMUSG00000017679	0.0204374	0.898114	-0.281705	0.00283575	Ttpal	tocopherol (alpha) transfer protein-like [Source:MGI Symbol;Acc:MGI:1923330]	163602314	163619013	7
ENSMUSG00000035783	0.131811	0.73144	0.751017	0.00284331	Acta2	actin, alpha 2, smooth muscle, aorta [Source:MGI Symbol;Acc:MGI:87909]	34241090	34255590	2
ENSMUSG00000028182	0.911206	0.0904754	1.3693	0.00284331	Lrriq3	leucine-rich repeats and IQ motif containing 3 [Source:MGI Symbol;Acc:MGI:1921685]	155093434	155194280	4
ENSMUSG00000039879	0.0221459	0.945411	0.545848	0.00284465	Heca	hdc homolog, cell cycle regulator [Source:MGI Symbol;Acc:MGI:2685715]	17868612	17948067	4
ENSMUSG00000033149	0.155877	0.575956	0.600448	0.00284465	Phldb2	pleckstrin homology like domain, family B, member 2 [Source:MGI Symbol;Acc:MGI:2444981]	45746243	45953598	11
ENSMUSG00000020108	-0.394009	0.230909	-0.771188	0.00284465	Ddit4	DNA-damage-inducible transcript 4 [Source:MGI Symbol;Acc:MGI:1921997]	59949669	59951834	1
ENSMUSG00000116056	0.219781	0.677585	1.15165	0.00284465	Gm4544	predicted gene 4544 [Source:MGI Symbol;Acc:MGI:3782728]	102657111	102660468	3
ENSMUSG00000050860	-0.365121	0.632408	1.72997	0.00285036	Phospho1	phosphatase, orphan 1 [Source:MGI Symbol;Acc:MGI:2447348]	95824499	95832140	3
ENSMUSG00000103622	0.430246	0.463018	1.46574	0.00285554	Gm38391	predicted gene, 38391 [Source:MGI Symbol;Acc:MGI:5613630]	92538801	92542869	1
ENSMUSG00000036667	-0.143229	0.58143	0.557224	0.00286169	Tcaf1	TRPM8 channel-associated factor 1 [Source:MGI Symbol;Acc:MGI:1914665]	42668002	42710088	8
ENSMUSG00000026131	-0.0751297	0.820858	0.612032	0.00286718	Dst	dystonin [Source:MGI Symbol;Acc:MGI:104627]	33908225	34308661	20
ENSMUSG00000040957	0.0366913	0.930763	0.714528	0.00286718	Cables1	CDK5 and Abl enzyme substrate 1 [Source:MGI Symbol;Acc:MGI:1927065]	11839220	11945630	3
ENSMUSG00000024907	0.388827	0.500308	1.27259	0.00286952	Gal	galanin [Source:MGI Symbol;Acc:MGI:95637]	3409915	3414544	2
ENSMUSG00000100174	0.910725	0.130777	1.4791	0.00286952	Gm28719	predicted gene 28719 [Source:MGI Symbol;Acc:MGI:5579425]	86498781	86500537	1
ENSMUSG00000002808	0.387262	0.180439	0.702259	0.00287651	Epdr1	ependymin related protein 1 (zebrafish) [Source:MGI Symbol;Acc:MGI:2145369]	19591706	19619927	4
ENSMUSG00000023826	0.277928	0.592949	1.18157	0.00287651	Prkn	parkin RBR E3 ubiquitin protein ligase [Source:MGI Symbol;Acc:MGI:1355296]	10840384	12063361	16
ENSMUSG00000028883	0.484308	0.117178	0.752046	0.00287762	Sema3a	sema domain, immunoglobulin domain (Ig), short basic domain, secreted, (semaphorin) 3A [Source:MGI Symbol;Acc:MGI:107558]	13125414	13602565	9
ENSMUSG00000074749	0.131863	0.613859	0.549505	0.00287783	Kiz	kizuna centrosomal protein [Source:MGI Symbol;Acc:MGI:2684960]	146855864	146970097	3
ENSMUSG00000106981	0.146719	0.744441	0.896662	0.00288404	Gm45495	predicted gene 45495 [Source:MGI Symbol;Acc:MGI:5791331]	53281810	53283509	1
ENSMUSG00000025558	0.0998006	0.724931	0.558784	0.00288444	Dock9	dedicator of cytokinesis 9 [Source:MGI Symbol;Acc:MGI:106321]	121542046	121797837	10
ENSMUSG00000045532	0.190522	0.756702	1.30247	0.0028868	C1ql1	complement component 1, q subcomponent-like 1 [Source:MGI Symbol;Acc:MGI:1344400]	102939264	102946688	1
ENSMUSG00000049321	0.105743	0.738298	0.641818	0.00289038	Zfp2	zinc finger protein 2 [Source:MGI Symbol;Acc:MGI:99167]	50898712	50916165	6
ENSMUSG00000032905	0.103232	0.493568	0.330442	0.00289204	Atg12	autophagy related 12 [Source:MGI Symbol;Acc:MGI:1914776]	46730144	46741580	3
ENSMUSG00000018547	-0.273368	0.0592191	-0.358358	0.00289222	Pip4k2b	phosphatidylinositol-5-phosphate 4-kinase, type II, beta [Source:MGI Symbol;Acc:MGI:1934234]	97715157	97744704	2
ENSMUSG00000020422	-0.241072	0.323308	0.557434	0.00289222	Tns3	tensin 3 [Source:MGI Symbol;Acc:MGI:2443012]	8431652	8664535	4
ENSMUSG00000040652	0.0552386	0.85564	0.554088	0.00289567	Oaz2	ornithine decarboxylase antizyme 2 [Source:MGI Symbol;Acc:MGI:109492]	65668001	65690300	7
ENSMUSG00000037300	-0.0580134	0.713789	-0.314047	0.00289567	Ttc13	tetratricopeptide repeat domain 13 [Source:MGI Symbol;Acc:MGI:2384573]	124671332	124721983	12
ENSMUSG00000028036	0.7873	0.0918711	1.17383	0.00289781	Ptgfr	prostaglandin F receptor [Source:MGI Symbol;Acc:MGI:97796]	151796502	151837630	3
ENSMUSG00000089635	0.206897	0.735695	1.21437	0.0029074	Gm16559	predicted gene 16559 [Source:MGI Symbol;Acc:MGI:4414979]	138281408	138307022	1
ENSMUSG00000030695	-0.294653	0.112772	-0.44992	0.0029074	Aldoa	aldolase A, fructose-bisphosphate [Source:MGI Symbol;Acc:MGI:87994]	126795234	126800751	12
ENSMUSG00000062694	0.362791	0.320832	0.877937	0.00291699	Cav3	caveolin 3 [Source:MGI Symbol;Acc:MGI:107570]	112459505	112472872	1
ENSMUSG00000107476	-0.0877147	0.595521	0.351712	0.00291702	Zfp862-ps	zinc finger protein 862, pseudogene [Source:MGI Symbol;Acc:MGI:1889827]	48504337	48534832	5
ENSMUSG00000035845	-0.16807	0.363443	-0.418058	0.00291702	Alg12	asparagine-linked glycosylation 12 (alpha-1,6-mannosyltransferase) [Source:MGI Symbol;Acc:MGI:2385025]	88805244	88819318	4
ENSMUSG00000053646	-0.0428071	0.836794	-0.382013	0.00291702	Plxnb1	plexin B1 [Source:MGI Symbol;Acc:MGI:2154238]	109095389	109119917	7
ENSMUSG00000039913			3.72271	0.00291702	Pak7	p21 (RAC1) activated kinase 7 [Source:MGI Symbol;Acc:MGI:1920334]	136081104	136387967	3
ENSMUSG00000016757	-0.317848	0.181905	-0.564781	0.00291991	Ttll12	tubulin tyrosine ligase-like family, member 12 [Source:MGI Symbol;Acc:MGI:3039573]	83575090	83595157	3
ENSMUSG00000026303	-0.231641	0.477555	-0.71239	0.00292264	Mlph	melanophilin [Source:MGI Symbol;Acc:MGI:2176380]	90915085	90951142	3
ENSMUSG00000060843	0.56247	0.57296	2.21865	0.00292399	Ctnna3	catenin (cadherin associated protein), alpha 3 [Source:MGI Symbol;Acc:MGI:2661445]	63430098	65003667	5
ENSMUSG00000032252	-0.097536	0.508773	0.325268	0.00292565	Glce	glucuronyl C5-epimerase [Source:MGI Symbol;Acc:MGI:2136405]	62057248	62122655	5
ENSMUSG00000015094	-0.100703	0.613146	-0.414615	0.00292581	Npdc1	neural proliferation, differentiation and control 1 [Source:MGI Symbol;Acc:MGI:1099802]	25399351	25409494	14
ENSMUSG00000060716	-0.0876433	0.659173	0.405891	0.0029267	Plekhh1	pleckstrin homology domain containing, family H (with MyTH4 domain) member 1 [Source:MGI Symbol;Acc:MGI:2144989]	79029163	79081655	4
ENSMUSG00000052595	0.0519429	0.858008	0.532562	0.00292727	A1cf	APOBEC1 complementation factor [Source:MGI Symbol;Acc:MGI:1917115]	31868764	31948995	5
ENSMUSG00000000223	0.549147	0.100915	0.853108	0.00294074	Drp2	dystrophin related protein 2 [Source:MGI Symbol;Acc:MGI:107432]	134404551	134456573	6
ENSMUSG00000045312	-0.0204259	0.971431	0.915582	0.00294647	Lhfpl2	lipoma HMGIC fusion partner-like 2 [Source:MGI Symbol;Acc:MGI:2145236]	94057796	94195409	9
ENSMUSG00000033055	-0.0457572	0.835073	-0.402803	0.00294766	Ankrd54	ankyrin repeat domain 54 [Source:MGI Symbol;Acc:MGI:2444209]	79053094	79062893	8
ENSMUSG00000083813	1.10135	0.0180483	1.20341	0.0029507	Gm15502	predicted gene 15502 [Source:MGI Symbol;Acc:MGI:3782949]	137896752	137896959	1
ENSMUSG00000022498	-0.20618	0.205387	-0.382938	0.0029507	Txndc11	thioredoxin domain containing 11 [Source:MGI Symbol;Acc:MGI:1923620]	11074911	11134650	9
ENSMUSG00000003411	-0.0549155	0.933485	1.11911	0.00295395	Rab3b	RAB3B, member RAS oncogene family [Source:MGI Symbol;Acc:MGI:1917158]	108879063	108943324	4
ENSMUSG00000061410	-0.184638	0.305744	0.416218	0.00295395	Zcchc14	zinc finger, CCHC domain containing 14 [Source:MGI Symbol;Acc:MGI:2159407]	121598703	121652901	4
ENSMUSG00000000378	-0.0767289	0.683353	-0.379397	0.00295507	Ccm2	cerebral cavernous malformation 2 [Source:MGI Symbol;Acc:MGI:2384924]	6546887	6596744	8
ENSMUSG00000026610	-0.232421	0.784499	1.667	0.0029595	Esrrg	estrogen-related receptor gamma [Source:MGI Symbol;Acc:MGI:1347056]	187608791	188214885	5
ENSMUSG00000009246	-0.422856	0.401244	1.16229	0.0029595	Trpm5	transient receptor potential cation channel, subfamily M, member 5 [Source:MGI Symbol;Acc:MGI:1861718]	143069153	143094642	8
ENSMUSG00000028139			6.63273	0.00296297	Riiad1	regulatory subunit of type II PKA R-subunit (RIIa) domain containing 1 [Source:MGI Symbol;Acc:MGI:1913603]	94464983	94480341	3
ENSMUSG00000042842	0.177934	0.69028	-0.894903	0.00296509	Serpinb6b	serine (or cysteine) peptidase inhibitor, clade B, member 6b [Source:MGI Symbol;Acc:MGI:894688]	32965209	32979067	4
ENSMUSG00000031618	-0.0107758	0.973249	0.506121	0.00296544	Nr3c2	nuclear receptor subfamily 3, group C, member 2 [Source:MGI Symbol;Acc:MGI:99459]	76899442	77245012	8
ENSMUSG00000007987	0.0961391	0.675114	-0.462442	0.00297118	Ift22	intraflagellar transport 22 [Source:MGI Symbol;Acc:MGI:1914536]	136908150	136915404	5
ENSMUSG00000029919	0.0928627	0.781518	0.638479	0.00297838	Hpgds	hematopoietic prostaglandin D synthase [Source:MGI Symbol;Acc:MGI:1859384]	65117293	65144908	3
ENSMUSG00000034792	0.290597	0.511474	-0.943889	0.00297894	Gna15	guanine nucleotide binding protein, alpha 15 [Source:MGI Symbol;Acc:MGI:95770]	81502306	81524225	3
ENSMUSG00000063887	0.390055	0.616482	1.91628	0.00298366	Nlgn1	neuroligin 1 [Source:MGI Symbol;Acc:MGI:2179435]	25426215	26332460	5
ENSMUSG00000035473	-0.442059	0.185456	0.792003	0.00298528	Galm	galactose mutarotase [Source:MGI Symbol;Acc:MGI:2442420]	80127471	80185101	2
ENSMUSG00000063529			4.59056	0.00298528	Stmnd1	stathmin domain containing 1 [Source:MGI Symbol;Acc:MGI:2686420]	46273721	46300115	1
ENSMUSG00000020590	-0.0381293	0.822198	0.31265	0.00300473	Snx13	sorting nexin 13 [Source:MGI Symbol;Acc:MGI:2661416]	35047186	35147479	7
ENSMUSG00000000058	0.390429	0.226263	0.756003	0.00300473	Cav2	caveolin 2 [Source:MGI Symbol;Acc:MGI:107571]	17281185	17289115	3
ENSMUSG00000028843	-0.235352	0.339878	-0.557126	0.00300508	Sh3bgrl3	SH3 domain binding glutamic acid-rich protein-like 3 [Source:MGI Symbol;Acc:MGI:1920973]	134127406	134128789	3
ENSMUSG00000022587	-0.0593413	0.939763	-1.31545	0.00300508	Ly6e	lymphocyte antigen 6 complex, locus E [Source:MGI Symbol;Acc:MGI:106651]	74955051	74959905	16
ENSMUSG00000047344	0.154646	0.871333	1.88987	0.00300542	Lancl3	LanC lantibiotic synthetase component C-like 3 (bacterial) [Source:MGI Symbol;Acc:MGI:2443335]	9199902	9268085	1
ENSMUSG00000058248	-0.257349	0.732919	1.64145	0.00300542	Kcnh1	potassium voltage-gated channel, subfamily H (eag-related), member 1 [Source:MGI Symbol;Acc:MGI:1341721]	192190774	192510159	3
ENSMUSG00000032125	0.256668	0.442512	0.757911	0.00301595	Robo4	roundabout guidance receptor 4 [Source:MGI Symbol;Acc:MGI:1921394]	37401897	37415115	6
ENSMUSG00000003235	-0.25429	0.140392	-0.412775	0.0030168	Eif2b5	eukaryotic translation initiation factor 2B, subunit 5 epsilon [Source:MGI Symbol;Acc:MGI:2446176]	20498817	20509323	3
ENSMUSG00000021870	0.155425	0.258324	0.318327	0.00301959	Slmap	sarcolemma associated protein [Source:MGI Symbol;Acc:MGI:1933549]	26413168	26534931	16
ENSMUSG00000038967	-0.293747	0.548934	1.05034	0.00302137	Pdk2	pyruvate dehydrogenase kinase, isoenzyme 2 [Source:MGI Symbol;Acc:MGI:1343087]	95026258	95041354	5
ENSMUSG00000035027	-0.141184	0.518674	-0.471575	0.00303249	Map2k2	mitogen-activated protein kinase kinase 2 [Source:MGI Symbol;Acc:MGI:1346867]	81105915	81133975	9
ENSMUSG00000097357	0.409345	0.351421	1.03567	0.0030385	Gm16793	predicted gene, 16793 [Source:MGI Symbol;Acc:MGI:4439717]	35582503	35588972	1
ENSMUSG00000038987	-0.0447545	0.905085	-0.643553	0.00305032	Cfap157	cilia and flagella associated protein 157 [Source:MGI Symbol;Acc:MGI:2447809]	32777381	32784428	2
ENSMUSG00000022756	0.0155631	0.952286	0.445964	0.00305533	Slc7a4	solute carrier family 7 (cationic amino acid transporter, y+ system), member 4 [Source:MGI Symbol;Acc:MGI:2146512]	17572018	17583214	11
ENSMUSG00000037784	0.193807	0.572593	0.748187	0.00305667	Dzip1l	DAZ interacting protein 1-like [Source:MGI Symbol;Acc:MGI:1919757]	99629496	99669256	7
ENSMUSG00000017652	0.487846	0.144537	-0.793196	0.00306398	Cd40	CD40 antigen [Source:MGI Symbol;Acc:MGI:88336]	165055627	165072948	7
ENSMUSG00000067629	0.340475	0.322496	0.787463	0.00307025	Syngap1	synaptic Ras GTPase activating protein 1 homolog (rat) [Source:MGI Symbol;Acc:MGI:3039785]	26941253	26972434	14
ENSMUSG00000019368	0.030698	0.982629	2.53878	0.00307025	Sec14l4	SEC14-like lipid binding 4 [Source:MGI Symbol;Acc:MGI:2144095]	4031462	4048024	8
ENSMUSG00000037573	0.0660638	0.790906	0.467069	0.00307025	Tob1	transducer of ErbB-2.1 [Source:MGI Symbol;Acc:MGI:1349721]	94211454	94215495	1
ENSMUSG00000039496	0.147492	0.743579	0.917553	0.00307025	Cdnf	cerebral dopamine neurotrophic factor [Source:MGI Symbol;Acc:MGI:3606576]	3513030	3526376	3
ENSMUSG00000011263	-0.276424	0.680434	1.38247	0.00307224	Exoc3l2	exocyst complex component 3-like 2 [Source:MGI Symbol;Acc:MGI:1921713]	19463331	19496762	2
ENSMUSG00000037679	-0.367192	0.387067	-0.949972	0.00307522	Inf2	inverted formin, FH2 and WH2 domain containing [Source:MGI Symbol;Acc:MGI:1917685]	112588784	112615557	3
ENSMUSG00000025486	0.18848	0.435107	0.538414	0.00307647	Sirt3	sirtuin 3 [Source:MGI Symbol;Acc:MGI:1927665]	140863666	140882309	10
ENSMUSG00000029231	-0.11624	0.804291	0.872405	0.00308015	Pdgfra	platelet derived growth factor receptor, alpha polypeptide [Source:MGI Symbol;Acc:MGI:97530]	75152292	75198215	9
ENSMUSG00000096617	-0.383285	0.255782	-0.778914	0.00308015	Gm5559	predicted gene 5559 [Source:MGI Symbol;Acc:MGI:3779498]	95861714	95862715	1
ENSMUSG00000052512	0.042799	0.917248	0.706955	0.00308929	Nav2	neuron navigator 2 [Source:MGI Symbol;Acc:MGI:2183691]	48908716	49610090	18
ENSMUSG00000021273	-0.233161	0.56589	-0.857782	0.00310311	Fdft1	farnesyl diphosphate farnesyl transferase 1 [Source:MGI Symbol;Acc:MGI:102706]	63145150	63179578	4
ENSMUSG00000031673	0.243724	0.358689	0.60067	0.00310939	Cdh11	cadherin 11 [Source:MGI Symbol;Acc:MGI:99217]	102632095	102785642	3
ENSMUSG00000091985	0.329209	0.214585	0.640461	0.00311269	Gm17354	predicted gene, 17354 [Source:MGI Symbol;Acc:MGI:4936988]	108633843	108637441	1
ENSMUSG00000031974	-0.185649	0.171868	-0.321597	0.00311269	Abcb10	ATP-binding cassette, sub-family B (MDR/TAP), member 10 [Source:MGI Symbol;Acc:MGI:1860508]	123952459	123983122	1
ENSMUSG00000021266	-0.772042	0.201984	-1.41535	0.00311269	Wars	tryptophanyl-tRNA synthetase [Source:MGI Symbol;Acc:MGI:104630]	108860030	108894174	7
ENSMUSG00000090641	0.471206	0.15375	0.807567	0.00311269	Zfp712	zinc finger protein 712 [Source:MGI Symbol;Acc:MGI:1925501]	67038596	67061170	1
ENSMUSG00000019877	0.147688	0.471579	0.447031	0.0031144	Serinc1	serine incorporator 1 [Source:MGI Symbol;Acc:MGI:1926228]	57515774	57532530	5
ENSMUSG00000028793	-0.214667	0.514794	-0.708635	0.00312763	Rnf19b	ring finger protein 19B [Source:MGI Symbol;Acc:MGI:1922484]	129058271	129085886	6
ENSMUSG00000023912	0.610698	0.10011	0.911333	0.00313245	Slc25a27	solute carrier family 25, member 27 [Source:MGI Symbol;Acc:MGI:1921261]	43641891	43667214	2
ENSMUSG00000042272	-0.0266748	0.923001	0.470541	0.00313345	Sestd1	SEC14 and spectrin domains 1 [Source:MGI Symbol;Acc:MGI:1916262]	77180340	77280592	4
ENSMUSG00000114733	-0.0690415	0.868609	0.894709	0.00314207	Gm4815	predicted gene 4815 [Source:MGI Symbol;Acc:MGI:3643439]	98613501	98614494	1
ENSMUSG00000074158	0.189483	0.443866	0.55557	0.00314473	Zfp976	zinc finger protein 976 [Source:MGI Symbol;Acc:MGI:3036263]	42609526	42642588	3
ENSMUSG00000036501	0.0573107	0.864884	0.604426	0.00314485	Fam13b	family with sequence similarity 13, member B [Source:MGI Symbol;Acc:MGI:2447834]	34442351	34506831	13
ENSMUSG00000027801	-0.0180227	0.985582	1.65089	0.00314485	Tm4sf4	transmembrane 4 superfamily member 4 [Source:MGI Symbol;Acc:MGI:2385173]	57425314	57441677	1
ENSMUSG00000020312	0.291215	0.515545	0.993091	0.00314485	Shc2	SHC (Src homology 2 domain containing) transforming protein 2 [Source:MGI Symbol;Acc:MGI:106180]	79618051	79637918	3
ENSMUSG00000022793	-0.0265448	0.942368	0.610938	0.00314485	B4galt4	UDP-Gal:betaGlcNAc beta 1,4-galactosyltransferase, polypeptide 4 [Source:MGI Symbol;Acc:MGI:1928387]	38742264	38769049	9
ENSMUSG00000097316	0.000699493	0.99874	0.662244	0.00314485	Gm10516	predicted gene 10516 [Source:MGI Symbol;Acc:MGI:3641979]	192136896	192151026	2
ENSMUSG00000006517	-0.364649	0.487128	-1.1338	0.00314485	Mvd	mevalonate (diphospho) decarboxylase [Source:MGI Symbol;Acc:MGI:2179327]	122433601	122443422	2
ENSMUSG00000024420	0.31777	0.423339	0.895434	0.00314485	Zfp521	zinc finger protein 521 [Source:MGI Symbol;Acc:MGI:95459]	13687013	13972787	7
ENSMUSG00000058709	-0.210579	0.14794	-0.346227	0.00314951	Egln2	egl-9 family hypoxia-inducible factor 2 [Source:MGI Symbol;Acc:MGI:1932287]	27158658	27166802	4
ENSMUSG00000062861	0.00141437	0.997356	0.681915	0.00314951	Zfp28	zinc finger protein 28 [Source:MGI Symbol;Acc:MGI:99175]	6383295	6396915	6
ENSMUSG00000069516	0.321501	0.313904	-0.723013	0.00314951	Lyz2	lysozyme 2 [Source:MGI Symbol;Acc:MGI:96897]	117277331	117282321	1
ENSMUSG00000032475	0.391696	0.0453164	0.47826	0.00315149	Nck1	non-catalytic region of tyrosine kinase adaptor protein 1 [Source:MGI Symbol;Acc:MGI:109601]	100492293	100546134	4
ENSMUSG00000027895	-0.500641	0.603671	2.49106	0.00315149	Kcnc4	potassium voltage gated channel, Shaw-related subfamily, member 4 [Source:MGI Symbol;Acc:MGI:96670]	107438303	107459552	1
ENSMUSG00000030757			1.94817	0.00315149	Zkscan2	zinc finger with KRAB and SCAN domains 2 [Source:MGI Symbol;Acc:MGI:2444060]	123475384	123500449	4
ENSMUSG00000025189	-0.0513629	0.902268	0.781405	0.00315149	Cnnm1	cyclin M1 [Source:MGI Symbol;Acc:MGI:1891366]	43440436	43497210	4
ENSMUSG00000028358	-0.158391	0.790102	1.11471	0.00315188	Zfp618	zinc finger protein 618 [Source:MGI Symbol;Acc:MGI:1919950]	62965573	63139708	4
ENSMUSG00000031621	0.632113	0.26799	1.31044	0.00315233	Isx	intestine specific homeobox [Source:MGI Symbol;Acc:MGI:1918847]	74873173	74893506	2
ENSMUSG00000044349	0.403016	0.341586	0.963152	0.00315504	Snhg11	small nucleolar RNA host gene 11 [Source:MGI Symbol;Acc:MGI:2441845]	158375638	158386145	5
ENSMUSG00000040165			3.49865	0.00315504	Cd209c	CD209c antigen [Source:MGI Symbol;Acc:MGI:2157945]	3940222	3954746	5
ENSMUSG00000022098	0.444978	0.0953847	0.647943	0.00315596	Bmp1	bone morphogenetic protein 1 [Source:MGI Symbol;Acc:MGI:88176]	70474558	70520234	7
ENSMUSG00000108484	-0.084056	0.742169	0.502013	0.00316572	Gm18537	predicted gene, 18537 [Source:MGI Symbol;Acc:MGI:5010722]	83548859	83550381	3
ENSMUSG00000046722	-0.187688	0.437975	-0.532909	0.00316751	Cdc42se1	CDC42 small effector 1 [Source:MGI Symbol;Acc:MGI:1889510]	95228732	95236409	5
ENSMUSG00000020407	-0.286128	0.633161	-1.22639	0.00316751	Upp1	uridine phosphorylase 1 [Source:MGI Symbol;Acc:MGI:1097668]	9118103	9136170	9
ENSMUSG00000114433	0.521132	0.369566	1.36457	0.00317224	Gm48488	predicted gene, 48488 [Source:MGI Symbol;Acc:MGI:6098010]	60176682	60182862	3
ENSMUSG00000001173	-0.0722132	0.694403	0.371718	0.00317224	Ocrl	OCRL, inositol polyphosphate-5-phosphatase [Source:MGI Symbol;Acc:MGI:109589]	47912387	47965868	7
ENSMUSG00000028020	0.490642	0.377559	1.27821	0.00318317	Glrb	glycine receptor, beta subunit [Source:MGI Symbol;Acc:MGI:95751]	80843599	80913660	6
ENSMUSG00000055197	-0.705466	0.315393	1.75229	0.00318432	Fev	FEV (ETS oncogene family) [Source:MGI Symbol;Acc:MGI:2449712]	74881509	74885419	3
ENSMUSG00000042447	0.0423768	0.786055	0.296986	0.00318432	Mios	meiosis regulator for oocyte development [Source:MGI Symbol;Acc:MGI:2182066]	8209222	8236274	3
ENSMUSG00000039037	0.703125	0.0962284	1.07788	0.00318432	St6galnac5	ST6 (alpha-N-acetyl-neuraminyl-2,3-beta-galactosyl-1,3)-N-acetylgalactosaminide alpha-2,6-sialyltransferase 5 [Source:MGI Symbol;Acc:MGI:1349471]	152817081	152982246	2
[truncated: 20,200 more rows]

## Sheet: KEGG pathway enriched
KEGG Pathway	Regulation by PA	Count	%	P value	FDR
mmu04080:Neuroactive ligand-receptor interaction	Up	57	4.25373	2.86999e-15	5.91217e-13
mmu00983:Drug metabolism - other enzymes	Up	19	1.41791	5.35368e-10	5.51429e-08
mmu04020:Calcium signaling pathway	Up	36	2.68657	8.28589e-10	5.68965e-08
mmu00140:Steroid hormone biosynthesis	Up	24	1.79104	1.49497e-09	7.69908e-08
mmu04726:Serotonergic synapse	Up	29	2.16418	5.70727e-09	2.3514e-07
mmu00830:Retinol metabolism	Up	23	1.71642	1.32975e-08	4.56547e-07
mmu04713:Circadian entrainment	Up	24	1.79104	1.80119e-08	5.30063e-07
mmu05204:Chemical carcinogenesis	Up	23	1.71642	2.56153e-08	6.59594e-07
mmu00040:Pentose and glucuronate interconversions	Up	13	0.970149	2.95413e-07	6.59814e-06
mmu00982:Drug metabolism - cytochrome P450	Up	18	1.34328	3.20298e-07	6.59814e-06
mmu04024:cAMP signaling pathway	Up	33	2.46269	3.77309e-07	7.06596e-06
mmu04261:Adrenergic signaling in cardiomyocytes	Up	27	2.01493	4.53569e-07	7.78626e-06
mmu04022:cGMP-PKG signaling pathway	Up	29	2.16418	6.41938e-07	1.01723e-05
mmu00053:Ascorbate and aldarate metabolism	Up	11	0.820896	2.43267e-06	3.5795e-05
mmu00980:Metabolism of xenobiotics by cytochrome P450	Up	15	1.1194	2.71863e-05	0.000373359
mmu04725:Cholinergic synapse	Up	20	1.49254	5.59783e-05	0.000720721
mmu04911:Insulin secretion	Up	17	1.26866	6.16223e-05	0.000746718
mmu04728:Dopaminergic synapse	Up	22	1.64179	6.73596e-05	0.000770894
mmu04512:ECM-receptor interaction	Up	17	1.26866	8.2269e-05	0.000891969
mmu04921:Oxytocin signaling pathway	Up	23	1.71642	0.000125456	0.00129219
mmu05414:Dilated cardiomyopathy	Up	16	1.19403	0.00014663	0.00143837
mmu04950:Maturity onset diabetes of the young	Up	9	0.671642	0.000157995	0.00147941
mmu04723:Retrograde endocannabinoid signaling	Up	18	1.34328	0.000172955	0.00154908
mmu05412:Arrhythmogenic right ventricular cardiomyopathy (ARVC)	Up	14	1.04478	0.000192783	0.00165472
mmu00860:Porphyrin and chlorophyll metabolism	Up	10	0.746269	0.000728935	0.00600643
mmu04270:Vascular smooth muscle contraction	Up	19	1.41791	0.000771658	0.0061139
mmu04614:Renin-angiotensin system	Up	9	0.671642	0.00108054	0.00824412
mmu04730:Long-term depression	Up	12	0.895522	0.00112918	0.00830757
mmu04924:Renin secretion	Up	13	0.970149	0.00123595	0.00877947
mmu04724:Glutamatergic synapse	Up	17	1.26866	0.001814	0.0124561
mmu04925:Aldosterone synthesis and secretion	Up	14	1.04478	0.00225544	0.0149878
mmu05031:Amphetamine addiction	Up	12	0.895522	0.00248195	0.0158085
mmu04970:Salivary secretion	Up	13	0.970149	0.00253244	0.0158085
mmu05033:Nicotine addiction	Up	9	0.671642	0.00268862	0.0162899
mmu04974:Protein digestion and absorption	Up	14	1.04478	0.00277954	0.0163596
mmu04916:Melanogenesis	Up	15	1.1194	0.00294452	0.0168492
mmu05410:Hypertrophic cardiomyopathy (HCM)	Up	13	0.970149	0.00315453	0.0170615
mmu00591:Linoleic acid metabolism	Up	10	0.746269	0.00317554	0.0170615
mmu04151:PI3K-Akt signaling pathway	Up	36	2.68657	0.0032301	0.0170615
mmu04976:Bile secretion	Up	12	0.895522	0.00395722	0.0203797
mmu04510:Focal adhesion	Up	24	1.79104	0.00440316	0.0221232
mmu00512:Mucin type O-Glycan biosynthesis	Up	7	0.522388	0.00637792	0.0312822
mmu01100:Metabolic pathways	Up	100	7.46269	0.00655545	0.0314052
mmu00350:Tyrosine metabolism	Up	8	0.597015	0.00908244	0.0425224
mmu04750:Inflammatory mediator regulation of TRP channels	Up	16	1.19403	0.0107561	0.0492392
mmu04971:Gastric acid secretion	Up	11	0.820896	0.0126327	0.0565727
mmu04340:Hedgehog signaling pathway	Up	6	0.447761	0.0141757	0.0621316
mmu05217:Basal cell carcinoma	Up	9	0.671642	0.0170752	0.0732809
mmu02010:ABC transporters	Up	8	0.597015	0.0218096	0.0916893
mmu04060:Cytokine-cytokine receptor interaction	Down	28	12.4444	2.67315e-18	2.72661e-16
mmu04514:Cell adhesion molecules (CAMs)	Down	18	8	2.7902e-11	1.28168e-09
mmu05323:Rheumatoid arthritis	Down	14	6.22222	3.76965e-11	1.28168e-09
mmu05321:Inflammatory bowel disease (IBD)	Down	12	5.33333	2.12972e-10	5.43078e-09
mmu05332:Graft-versus-host disease	Down	11	4.88889	1.0722e-09	2.18728e-08
mmu04940:Type I diabetes mellitus	Down	11	4.88889	6.53057e-09	1.1102e-07
mmu04612:Antigen processing and presentation	Down	12	5.33333	8.2838e-09	1.20707e-07
mmu05330:Allograft rejection	Down	10	4.44444	4.01482e-08	5.1189e-07
mmu05164:Influenza A	Down	15	6.66667	4.59879e-08	5.21196e-07
mmu05140:Leishmaniasis	Down	10	4.44444	1.33701e-07	1.36375e-06
mmu05310:Asthma	Down	7	3.11111	5.20554e-07	4.82696e-06
mmu05145:Toxoplasmosis	Down	11	4.88889	1.0935e-06	9.29478e-06
mmu05152:Tuberculosis	Down	13	5.77778	3.19382e-06	2.50592e-05
mmu05150:Staphylococcus aureus infection	Down	8	3.55556	3.67098e-06	2.67457e-05
mmu05143:African trypanosomiasis	Down	7	3.11111	5.57839e-06	3.7933e-05
mmu05416:Viral myocarditis	Down	9	4	8.70708e-06	5.55076e-05
mmu04672:Intestinal immune network for IgA production	Down	7	3.11111	1.67247e-05	0.000100348
mmu05168:Herpes simplex infection	Down	13	5.77778	1.77268e-05	0.000100452
mmu05144:Malaria	Down	7	3.11111	3.66883e-05	0.000196958
mmu05320:Autoimmune thyroid disease	Down	8	3.55556	3.89285e-05	0.000198535
mmu04640:Hematopoietic cell lineage	Down	8	3.55556	0.000124172	0.00060312
mmu04380:Osteoclast differentiation	Down	9	4	0.000251152	0.00116443
mmu04650:Natural killer cell mediated cytotoxicity	Down	8	3.55556	0.000461332	0.00204591
mmu04668:TNF signaling pathway	Down	8	3.55556	0.000578432	0.00245834
mmu05340:Primary immunodeficiency	Down	5	2.22222	0.000996186	0.00406444
mmu04062:Chemokine signaling pathway	Down	10	4.44444	0.00111809	0.00438635
mmu04623:Cytosolic DNA-sensing pathway	Down	6	2.66667	0.00152539	0.00576259
mmu04064:NF-kappa B signaling pathway	Down	7	3.11111	0.0017514	0.00638011
mmu04660:T cell receptor signaling pathway	Down	7	3.11111	0.00215272	0.00757165
mmu04630:Jak-STAT signaling pathway	Down	8	3.55556	0.00304125	0.0103402
mmu05322:Systemic lupus erythematosus	Down	8	3.55556	0.00328284	0.0108016
mmu04620:Toll-like receptor signaling pathway	Down	6	2.66667	0.0107898	0.0343925
mmu04066:HIF-1 signaling pathway	Down	6	2.66667	0.0112293	0.0347088
mmu05142:Chagas disease (American trypanosomiasis)	Down	6	2.66667	0.0116809	0.0350428
mmu04145:Phagosome	Down	7	3.11111	0.0257925	0.0751667
mmu05166:HTLV-I infection	Down	9	4	0.0297696	0.0843472
mmu05162:Measles	Down	6	2.66667	0.0342106	0.0943104
mmu04621:NOD-like receptor signaling pathway	Down	4	1.77778	0.0395652	0.106201
