# Supplementary material for: Multi-omics analysis detected multiple pathways by which pomegranate punicalagin exerts its biological effects in modulating host–microbiota interactions in murine colitis models
Source: Royal Society of Chemistry journal article supplement (doi:10.1039/d3fo00286a), 2023-01-01
Supplement: d3fo00286a4.xlsx [file d3fo00286a4.xlsx]

## Sheet: Genes in modules in MD network
Gene_ID	Gene_start_bp	Gene_end_bp	Gene_description	Gene_name	Gene_type	Strand	Module in MD network	MM.green	p.MM.green	MM.grey60	p.MM.grey60	MM.pink	p.MM.pink	MM.salmon	p.MM.salmon	MM.cyan	p.MM.cyan	MM.magenta	p.MM.magenta	MM.blue	p.MM.blue	MM.brown	p.MM.brown	MM.midnightblue	p.MM.midnightblue	MM.red	p.MM.red	MM.black	p.MM.black	MM.yellow	p.MM.yellow	MM.turquoise	p.MM.turquoise	MM.lightcyan	p.MM.lightcyan	MM.lightyellow	p.MM.lightyellow	MM.greenyellow	p.MM.greenyellow	MM.lightgreen	p.MM.lightgreen	MM.purple	p.MM.purple	MM.tan	p.MM.tan	MM.grey	p.MM.grey
ENSMUSG00000021982	59559388	59597959	cytidine and dCMP deaminase domain containing 1 [Source:MGI Symbol;Acc:MGI:1919141]	Cdadc1	protein_coding	-1	yellow	-0.318752	0.312582	-0.108817	0.736392	0.0536111	0.868571	-0.547562	0.0653571	-0.420943	0.172978	0.13633	0.672676	-0.482538	0.112092	-0.0352781	0.913327	0.36912	0.237683	0.134562	0.676716	-0.175484	0.585393	0.515433	0.0863268	0.107025	0.7406	0.468642	0.124354	-0.254543	0.424642	0.426024	0.167306	0.0741667	0.818812	0.302245	0.339662	-0.413116	0.181948	0.0619119	0.848415
ENSMUSG00000043090	69761326	69791178	zinc finger protein 866 [Source:MGI Symbol;Acc:MGI:3584369]	Zfp866	protein_coding	-1	yellow	-0.151476	0.638398	-0.123434	0.702324	0.0798	0.805275	-0.574793	0.0505863	-0.252136	0.429184	0.153316	0.634276	-0.499168	0.0985037	-0.16385	0.610864	0.339061	0.280968	0.259492	0.415375	-0.39179	0.207834	0.508069	0.0917057	0.218232	0.495619	0.410559	0.184939	-0.356522	0.255311	0.376632	0.227525	0.320983	0.309016	0.333042	0.29014	-0.344406	0.272963	-0.156124	0.628004
ENSMUSG00000020189	111164752	111297249	oxysterol binding protein-like 8 [Source:MGI Symbol;Acc:MGI:2443807]	Osbpl8	protein_coding	1	yellow	-0.431959	0.160831	0.0501438	0.877012	0.192147	0.549655	-0.587018	0.0447881	-0.362399	0.246996	0.199888	0.533369	-0.428433	0.164659	0.197373	0.538639	0.286197	0.367153	0.05429	0.866919	-0.199846	0.533458	0.464385	0.128279	-0.124622	0.699575	0.430011	0.162939	-0.200337	0.532432	0.539579	0.0701973	0.0705625	0.827498	0.33605	0.285535	-0.527881	0.077728	-0.218985	0.494096
ENSMUSG00000110185	36298679	36301517	IgA inducing protein [Source:MGI Symbol;Acc:MGI:1924271]	Igip	protein_coding	1	yellow	-0.455706	0.136529	-0.170091	0.59715	0.242155	0.448274	-0.728064	0.00725961	-0.418587	0.175649	0.0191302	0.952945	-0.549547	0.0641905	0.00319856	0.992129	0.501043	0.0970447	0.141857	0.660097	-0.410827	0.184625	0.585007	0.045708	0.0939482	0.771499	0.361834	0.247788	-0.256992	0.420044	0.421476	0.172377	0.402056	0.195108	0.421407	0.172455	-0.29931	0.344604	-0.30995	0.326869
ENSMUSG00000039007	33083129	33594552	carboxypeptidase Q [Source:MGI Symbol;Acc:MGI:1889205]	Cpq	protein_coding	1	yellow	-0.283612	0.371689	-0.56768	0.0541921	-0.199338	0.534519	-0.492383	0.103907	-0.169634	0.598149	-0.108452	0.737248	-0.455062	0.137155	-0.401424	0.195878	0.592088	0.0425274	0.0250958	0.938293	-0.143838	0.655609	0.402227	0.194901	0.324592	0.303297	-0.179445	0.576815	-0.0655516	0.839602	0.326858	0.299736	0.271547	0.393232	0.0737189	0.819891	-0.0513397	0.874099	0.406163	0.190155
ENSMUSG00000021054	75714249	75735729	sphingosine-1-phosphate phosphatase 1 [Source:MGI Symbol;Acc:MGI:2135760]	Sgpp1	protein_coding	-1	yellow	-0.213385	0.505476	-0.216011	0.500126	0.123219	0.702821	-0.577383	0.0493164	-0.6051	0.037097	0.380225	0.22276	-0.823925	0.000983651	-0.291255	0.358366	0.55879	0.0589467	0.492629	0.103707	-0.499144	0.098523	0.778036	0.00288311	0.336328	0.285111	0.406281	0.190014	-0.431579	0.161241	0.517711	0.0847073	0.388228	0.212365	0.46979	0.123309	-0.321192	0.308684	0.11658	0.71824
ENSMUSG00000093507	96254619	96256277	predicted gene 20627 [Source:MGI Symbol;Acc:MGI:5313074]	Gm20627	processed_transcript	-1	yellow	-0.421946	0.171848	-0.305296	0.334563	0.21307	0.506119	-0.703991	0.0106074	-0.620459	0.0313463	0.331349	0.29275	-0.742786	0.00564781	-0.0561347	0.862435	0.682756	0.0144106	0.329663	0.295361	-0.327926	0.298066	0.766152	0.00366195	0.141203	0.661582	0.369156	0.237634	-0.227514	0.476989	0.655247	0.020727	0.372755	0.232735	0.54885	0.0645987	-0.349813	0.265001	0.164797	0.608776
ENSMUSG00000020069	63014664	63024217	heterogeneous nuclear ribonucleoprotein H3 [Source:MGI Symbol;Acc:MGI:1926462]	Hnrnph3	protein_coding	-1	yellow	-0.541147	0.0692278	-0.0693099	0.830521	0.318553	0.312901	-0.736786	0.00626819	-0.615541	0.0331125	0.305287	0.334579	-0.681741	0.0146146	0.139377	0.665732	0.584473	0.0459544	0.221475	0.489072	-0.258258	0.417677	0.731612	0.00684305	-0.0317419	0.92199	0.455443	0.136784	-0.300391	0.342779	0.68827	0.0133393	0.200363	0.532377	0.491168	0.104895	-0.55494	0.0610934	-0.0291344	0.928383
ENSMUSG00000059970	76404176	76406938	heat shock protein 2 [Source:MGI Symbol;Acc:MGI:96243]	Hspa2	protein_coding	1	yellow	-0.389929	0.210193	0.0711072	0.826184	0.0780029	0.809589	-0.364489	0.244077	-0.629768	0.0281898	0.242222	0.448144	-0.642994	0.0241085	-0.102276	0.751782	0.230879	0.470315	0.203771	0.525278	-0.276316	0.384641	0.550475	0.0636499	0.0892384	0.782705	0.344811	0.272362	-0.423431	0.170185	0.35852	0.252466	-0.0606428	0.851491	0.12823	0.69125	-0.475778	0.117952	0.0391197	0.903925
ENSMUSG00000079184	56668248	56697430	M-phase phosphoprotein 8 [Source:MGI Symbol;Acc:MGI:1922589]	Mphosph8	protein_coding	1	yellow	-0.400435	0.197084	-0.0747735	0.817352	0.344151	0.273343	-0.654649	0.0208838	-0.576664	0.0496666	0.209375	0.513694	-0.615432	0.0331525	0.0414269	0.898284	0.336635	0.284644	0.253385	0.426825	-0.361866	0.247743	0.633301	0.0270541	0.0728308	0.822029	0.40155	0.195724	-0.343378	0.274493	0.377678	0.226131	0.260458	0.413579	0.331427	0.292629	-0.364777	0.243677	-0.183022	0.569114
ENSMUSG00000051236	120781096	120899101	methionine sulfoxide reductase B3 [Source:MGI Symbol;Acc:MGI:2443538]	Msrb3	protein_coding	-1	yellow	-0.345999	0.270604	0.0475217	0.883403	0.029167	0.928303	-0.383274	0.218764	-0.69342	0.012393	0.288347	0.363404	-0.81281	0.00130959	-0.256587	0.420803	0.484739	0.110226	0.393741	0.205377	-0.541207	0.0691911	0.704414	0.0105402	0.240526	0.451426	0.5116	0.0890994	-0.536751	0.0719698	0.474194	0.119355	0.20958	0.513273	0.421799	0.172014	-0.448574	0.143561	-0.0747732	0.817353
ENSMUSG00000030303	148047259	148182758	fatty acyl CoA reductase 2 [Source:MGI Symbol;Acc:MGI:2687035]	Far2	protein_coding	1	yellow	-0.361272	0.248578	-0.165842	0.606473	0.330651	0.29383	-0.73584	0.00637047	-0.571114	0.0524298	0.333551	0.289357	-0.722673	0.00792844	-0.0260064	0.936058	0.425409	0.167987	0.354994	0.2575	-0.542847	0.0681869	0.684338	0.014097	0.110651	0.732091	0.272831	0.39091	-0.20577	0.521133	0.510698	0.0897604	0.506618	0.0927922	0.498482	0.0990414	-0.183777	0.567494	-0.277378	0.382742
ENSMUSG00000047648	11281330	11298052	F-box protein 30 [Source:MGI Symbol;Acc:MGI:1919115]	Fbxo30	protein_coding	1	yellow	-0.45692	0.135355	-0.0233749	0.942518	0.252926	0.427691	-0.703696	0.0106543	-0.423858	0.169709	0.221258	0.48951	-0.625855	0.0294873	0.100506	0.755963	0.703195	0.0107346	0.241694	0.449165	-0.449821	0.142315	0.697929	0.011606	0.0144119	0.964543	0.541643	0.068923	-0.29176	0.357495	0.72715	0.00736987	0.399444	0.198299	0.70103	0.0110867	-0.500268	0.0976462	-0.328314	0.297461
ENSMUSG00000072762	109735990	109751886	RIKEN cDNA 4930522L14 gene [Source:MGI Symbol;Acc:MGI:1925270]	4930522L14Rik	protein_coding	-1	yellow	-0.211613	0.509099	-0.416795	0.177696	0.0278878	0.931441	-0.613543	0.0338503	-0.416349	0.178208	0.230186	0.471685	-0.639067	0.0252724	-0.265622	0.40404	0.664173	0.0184918	0.313825	0.320536	-0.274919	0.387147	0.640675	0.0247912	0.312639	0.322466	0.169096	0.599327	-0.124131	0.70071	0.522915	0.0810851	0.37845	0.225107	0.43486	0.157726	-0.108546	0.737028	0.316345	0.316453
ENSMUSG00000037652	30899371	30969415	polyhomeotic 3 [Source:MGI Symbol;Acc:MGI:2181434]	Phc3	protein_coding	-1	yellow	-0.570658	0.0526615	-0.466821	0.126023	0.244528	0.443699	-0.636345	0.0261026	-0.365031	0.243324	0.00460832	0.98866	-0.296126	0.350009	0.218474	0.49513	0.292415	0.356367	-0.146517	0.649553	-0.00918136	0.977408	0.321721	0.307842	-0.16387	0.610821	-0.131385	0.683998	0.253578	0.42646	0.330578	0.293942	0.231964	0.468172	0.130512	0.686001	-0.0412146	0.898803	0.0794855	0.80603
ENSMUSG00000075254	33684370	33771576	heart development protein with EGF-like domains 1 [Source:MGI Symbol;Acc:MGI:1924696]	Heg1	protein_coding	1	yellow	0.0249746	0.93859	0.313762	0.320637	0.658209	0.0199647	-0.407765	0.188244	-0.113254	0.726	0.567552	0.0542587	-0.357579	0.253804	0.267414	0.400755	0.460319	0.132103	0.483272	0.111467	-0.0949469	0.769128	0.515648	0.0861734	-0.0898111	0.78134	0.165733	0.606713	-0.40505	0.191489	0.585928	0.045285	0.211867	0.50858	0.446569	0.145578	-0.45979	0.132606	-0.0760217	0.814349
ENSMUSG00000073664	60180599	60338328	neurobeachin like 1 [Source:MGI Symbol;Acc:MGI:2444343]	Nbeal1	protein_coding	1	yellow	-0.193961	0.545821	-0.473423	0.120041	0.0801845	0.804353	-0.618542	0.0320266	-0.415606	0.179064	0.258826	0.416618	-0.804858	0.00158953	-0.385113	0.216375	0.802058	0.00169832	0.476003	0.117754	-0.635744	0.0262885	0.779653	0.0027878	0.4255	0.167885	0.188018	0.558426	-0.259392	0.415562	0.556267	0.0603473	0.690624	0.0129004	0.613523	0.0338577	-0.0949337	0.769159	0.0488734	0.880108
ENSMUSG00000029463	122364580	122372364	family with sequence similarity 216, member A [Source:MGI Symbol;Acc:MGI:1916198]	Fam216a	protein_coding	-1	yellow	0.0050427	0.987591	-0.270068	0.395915	-0.126861	0.694407	-0.23158	0.46893	-0.263245	0.408416	0.243251	0.446158	-0.482223	0.11236	-0.300953	0.341832	0.398985	0.198863	0.328994	0.296402	-0.354023	0.258896	0.468989	0.124037	0.319976	0.310623	0.332797	0.290516	-0.198064	0.537188	0.339462	0.280362	0.259694	0.415	0.381943	0.220504	-0.168451	0.600741	0.193657	0.546464
ENSMUSG00000029361	117781032	117958840	nitric oxide synthase 1, neuronal [Source:MGI Symbol;Acc:MGI:97360]	Nos1	protein_coding	1	yellow	0.140673	0.662786	-0.398498	0.199462	-0.0481914	0.88177	-0.375416	0.229152	-0.26244	0.409905	0.076919	0.812193	-0.631626	0.0275884	-0.581084	0.0475407	0.57898	0.0485446	0.556895	0.0599968	-0.719081	0.00839912	0.643192	0.0240511	0.664824	0.0183358	0.46787	0.12506	-0.459882	0.132517	0.154858	0.630829	0.676146	0.0157772	0.532896	0.0744353	-0.00408469	0.989948	-0.0630903	0.84556
ENSMUSG00000053192	95219135	95232171	myeloid/lymphoid or mixed-lineage leukemia; translocated to, 11 [Source:MGI Symbol;Acc:MGI:1929671]	Mllt11	protein_coding	-1	yellow	-0.325984	0.301107	-0.359695	0.250801	0.213205	0.505842	-0.670469	0.0170249	-0.569248	0.0533824	0.197072	0.53927	-0.653689	0.0211365	-0.151132	0.63917	0.609173	0.0355044	0.316507	0.316193	-0.232571	0.466977	0.690159	0.0129863	0.246187	0.440514	0.289503	0.361398	-0.271894	0.392604	0.433832	0.158822	0.344735	0.272475	0.377257	0.226692	-0.228077	0.475869	0.274394	0.388092
ENSMUSG00000100615	11438031	11438832	predicted gene 5511 [Source:MGI Symbol;Acc:MGI:3779492]	Gm5511	processed_pseudogene	1	yellow	-0.232603	0.466913	-0.134245	0.677441	0.0689486	0.831393	-0.572618	0.0516704	-0.139981	0.664359	-0.157325	0.625329	-0.365337	0.242898	-0.20868	0.515125	0.459341	0.133033	0.101301	0.754085	-0.200361	0.532381	0.414863	0.179922	0.24824	0.436588	0.27937	0.379192	-0.454121	0.138072	0.23158	0.46893	0.241867	0.448831	0.143513	0.656344	-0.354229	0.258599	-0.0589137	0.855686
ENSMUSG00000012076	55836324	55869736	breast cancer metastasis-suppressor 1-like [Source:MGI Symbol;Acc:MGI:1196337]	Brms1l	protein_coding	1	yellow	-0.574666	0.0506492	-0.346342	0.270097	0.417698	0.176663	-0.834366	0.000738215	-0.570915	0.0525306	0.299324	0.34458	-0.660185	0.0194675	0.102972	0.750141	0.500157	0.0977328	0.159375	0.620772	-0.121427	0.706974	0.661719	0.0190879	-0.0492311	0.879236	-0.0514183	0.873908	-0.144349	0.654453	0.589729	0.0435691	0.272444	0.391609	0.200886	0.531286	-0.34727	0.268729	0.214724	0.502745
ENSMUSG00000041153	15997121	16013888	oxidative stress induced growth inhibitor family member 2 [Source:MGI Symbol;Acc:MGI:2384798]	Osgin2	protein_coding	-1	yellow	0.0429351	0.894599	-0.108866	0.736276	0.077509	0.810775	-0.326	0.301082	-0.444403	0.147779	0.291687	0.35762	-0.51721	0.0850616	-0.301067	0.341641	0.0970063	0.764244	0.445222	0.146944	-0.345899	0.270752	0.455466	0.136762	0.324649	0.303207	0.423663	0.169927	-0.466398	0.126413	0.112622	0.727477	0.258745	0.416767	0.169748	0.597899	-0.206418	0.519794	0.106491	0.741855
ENSMUSG00000037490	22645011	22704285	solute carrier family 2 (facilitated glucose transporter), member 12 [Source:MGI Symbol;Acc:MGI:3052471]	Slc2a12	protein_coding	1	yellow	-0.368208	0.238935	0.196045	0.541429	-0.109766	0.734165	-0.163009	0.612722	-0.739158	0.00601711	0.258609	0.417022	-0.705156	0.0104229	-0.246925	0.439101	0.165694	0.606801	0.26868	0.398442	-0.548283	0.0649318	0.44644	0.145709	0.115386	0.721022	0.325948	0.301163	-0.344474	0.272862	0.308242	0.329681	0.115832	0.719984	0.255339	0.423144	-0.212207	0.507885	-0.235056	0.462092
ENSMUSG00000082896	18008806	18010996	predicted gene 5844 [Source:MGI Symbol;Acc:MGI:3645252]	Gm5844	processed_pseudogene	1	yellow	-0.166702	0.604581	-0.0461858	0.886662	0.241114	0.450287	-0.683849	0.0141935	-0.302825	0.338688	0.127997	0.691787	-0.643431	0.0239817	-0.222519	0.486974	0.641205	0.0246339	0.431946	0.160845	-0.527953	0.0776798	0.713196	0.00921475	0.33437	0.288101	0.564002	0.0561254	-0.653586	0.0211639	0.451825	0.140327	0.495574	0.101342	0.514742	0.0868224	-0.476243	0.117543	-0.256834	0.420339
ENSMUSG00000066829	22276748	22307648	zinc finger protein 810 [Source:MGI Symbol;Acc:MGI:2384563]	Zfp810	protein_coding	-1	yellow	-0.342212	0.276233	-0.468476	0.124505	0.31592	0.31714	-0.89778	7.38698e-05	-0.273986	0.388826	0.105063	0.745214	-0.571437	0.0522661	-0.0943894	0.770451	0.706059	0.0102816	0.203369	0.526113	-0.172991	0.590815	0.668836	0.0173969	0.210127	0.512149	0.000702533	0.998271	-0.183523	0.568039	0.525417	0.0793812	0.43184	0.16096	0.305385	0.334416	-0.227184	0.477645	0.201389	0.530235
ENSMUSG00000029571	13069759	13089269	transmembrane protein 106B [Source:MGI Symbol;Acc:MGI:1919150]	Tmem106b	protein_coding	1	yellow	-0.0282368	0.930585	-0.218149	0.495788	-0.00326749	0.991959	-0.426282	0.167021	-0.375091	0.229588	0.219186	0.493688	-0.784932	0.00249324	-0.501095	0.0970042	0.72662	0.00743445	0.571939	0.0520121	-0.686618	0.0136539	0.777046	0.0029427	0.549666	0.0641208	0.500779	0.0972492	-0.60394	0.0375602	0.429475	0.163522	0.536407	0.0721874	0.577071	0.0494678	-0.310422	0.326093	-0.0188907	0.953533
ENSMUSG00000033166	99075206	99099770	DIS3 homolog, exosome endoribonuclease and 3'-5' exoribonuclease [Source:MGI Symbol;Acc:MGI:1919912]	Dis3	protein_coding	-1	yellow	-0.30996	0.326853	-0.135827	0.673826	0.265028	0.405131	-0.732236	0.00677175	-0.247257	0.438465	0.0104262	0.974345	-0.503716	0.09499	-0.0920556	0.775997	0.578619	0.0487183	0.215163	0.501849	-0.299999	0.343441	0.584197	0.0460823	0.184308	0.566354	0.339287	0.280627	-0.478964	0.115166	0.415804	0.178836	0.381713	0.220805	0.328126	0.297755	-0.440265	0.15204	-0.146191	0.650291
ENSMUSG00000036292	43980350	44063345	GRAM domain containing 1C [Source:MGI Symbol;Acc:MGI:2443024]	Gramd1c	protein_coding	-1	yellow	-0.105174	0.744953	-0.430186	0.162749	0.184423	0.566109	-0.777033	0.00294346	-0.169863	0.597647	-0.00237941	0.994144	-0.524296	0.0801417	-0.255126	0.423545	0.809679	0.00141488	0.369849	0.236686	-0.479161	0.114995	0.66079	0.0193172	0.419657	0.174432	0.403936	0.192831	-0.284556	0.370028	0.416715	0.177788	0.738704	0.00606453	0.653842	0.0210962	-0.0937678	0.771927	-0.121227	0.707437
ENSMUSG00000083899	77293444	77295898	predicted gene 12346 [Source:MGI Symbol;Acc:MGI:3649810]	Gm12346	transcribed_processed_pseudogene	1	yellow	-0.179887	0.575861	0.00634552	0.984385	0.217886	0.49632	-0.62634	0.0293242	-0.298416	0.346117	0.0827528	0.798198	-0.599151	0.0395147	-0.203962	0.524882	0.558628	0.0590363	0.384014	0.217801	-0.538278	0.0710091	0.649342	0.0223103	0.302493	0.339245	0.558695	0.0589994	-0.630884	0.0278275	0.38763	0.213131	0.460672	0.131768	0.473922	0.119596	-0.446039	0.146114	-0.342221	0.27622
ENSMUSG00000047227	64917906	64924592	predicted gene 527 [Source:MGI Symbol;Acc:MGI:2685373]	Gm527	protein_coding	1	yellow	0.106601	0.741597	-0.536275	0.072271	-0.0519322	0.872657	-0.524072	0.0802942	-0.137542	0.669912	0.0593556	0.854614	-0.622999	0.0304609	-0.620253	0.031419	0.74478	0.00545235	0.475041	0.118603	-0.431542	0.161282	0.672749	0.0165154	0.681055	0.0147538	0.19129	0.551472	-0.455948	0.136295	0.284676	0.369817	0.536073	0.0723995	0.344598	0.272678	-0.106646	0.74149	0.34642	0.269981
ENSMUSG00000029335	98854415	98884396	bone morphogenetic protein 3 [Source:MGI Symbol;Acc:MGI:88179]	Bmp3	protein_coding	1	yellow	-0.0363842	0.910619	-0.284232	0.370598	-0.102668	0.750858	-0.359921	0.250482	-0.345699	0.271047	0.179576	0.576534	-0.751113	0.00486501	-0.572558	0.0517005	0.669921	0.017149	0.489576	0.106199	-0.568645	0.0536929	0.694437	0.0122121	0.556634	0.0601422	0.287538	0.364813	-0.53701	0.0718066	0.37573	0.228731	0.423772	0.169805	0.387935	0.21274	-0.248984	0.435169	0.171881	0.593237
ENSMUSG00000046603	122805539	122836334	T cell activation inhibitor, mitochondrial [Source:MGI Symbol;Acc:MGI:1196217]	Tcaim	protein_coding	1	yellow	-0.171467	0.59414	-0.46136	0.131117	0.30922	0.328069	-0.660369	0.0194218	-0.322011	0.307381	0.161228	0.616662	-0.431652	0.161163	-0.115677	0.720343	0.294046	0.353565	0.267218	0.401114	-0.131941	0.682722	0.475873	0.117869	0.191871	0.550241	0.0929302	0.773917	-0.266249	0.402889	0.203535	0.525767	0.414282	0.180594	0.103026	0.750014	-0.171292	0.594523	0.258883	0.416511
ENSMUSG00000021270	110690605	110702728	heat shock protein 90, alpha (cytosolic), class A member 1 [Source:MGI Symbol;Acc:MGI:96250]	Hsp90aa1	protein_coding	-1	yellow	-0.235229	0.461753	0.0209128	0.948565	0.298925	0.345255	-0.685119	0.0139441	-0.376017	0.228348	0.18718	0.560214	-0.671305	0.0168367	-0.142864	0.657814	0.593202	0.0420417	0.425531	0.167852	-0.536702	0.0720007	0.723195	0.00786182	0.249891	0.433443	0.565826	0.0551607	-0.649895	0.0221585	0.487722	0.10773	0.46392	0.128712	0.514602	0.0869228	-0.521893	0.0817877	-0.315053	0.318543
ENSMUSG00000037058	35598617	35617187	polyadenylate-binding protein-interacting protein 2 [Source:MGI Symbol;Acc:MGI:1915119]	Paip2	protein_coding	1	yellow	-0.452223	0.139935	-0.0916231	0.777026	0.387737	0.212994	-0.810907	0.00137283	-0.588819	0.0439757	0.47134	0.121907	-0.766376	0.00364593	0.0740145	0.819179	0.682205	0.0145211	0.371433	0.234528	-0.241654	0.449243	0.806743	0.00151939	0.0117312	0.971135	0.361001	0.248959	-0.396438	0.202012	0.812765	0.00131106	0.297269	0.348064	0.511624	0.0890816	-0.60159	0.0385103	0.12565	0.6972
ENSMUSG00000101335	88441500	88443652	predicted gene 28229 [Source:MGI Symbol;Acc:MGI:5578935]	Gm28229	sense_intronic	-1	yellow	-0.716258	0.0087833	-0.184123	0.566752	0.308306	0.329575	-0.604145	0.0374779	-0.712428	0.00932545	0.364018	0.244733	-0.562592	0.0568794	0.268515	0.398745	0.275084	0.386852	0.00745759	0.981649	0.00445105	0.989047	0.467387	0.125502	-0.307579	0.330777	-0.070668	0.827243	0.0362395	0.910973	0.591301	0.0428731	0.0586335	0.856366	0.126088	0.69619	-0.342843	0.27529	0.216765	0.498594
ENSMUSG00000032374	92542223	92608428	procollagen lysine, 2-oxoglutarate 5-dioxygenase 2 [Source:MGI Symbol;Acc:MGI:1347007]	Plod2	protein_coding	1	yellow	-0.216518	0.499094	0.258651	0.416943	0.233208	0.465722	-0.474959	0.118675	-0.592039	0.0425491	0.455566	0.136665	-0.740103	0.00591923	-0.0822086	0.799502	0.379113	0.224229	0.489908	0.105925	-0.472627	0.120752	0.710111	0.00966528	0.141925	0.659943	0.678134	0.0153566	-0.663053	0.0187621	0.549209	0.0643879	0.177725	0.580534	0.470821	0.122376	-0.637865	0.0256366	-0.187808	0.558874
ENSMUSG00000027208	126034658	126091185	fibroblast growth factor 7 [Source:MGI Symbol;Acc:MGI:95521]	Fgf7	protein_coding	1	yellow	-0.364209	0.244466	-0.0566001	0.861304	0.0191306	0.952944	-0.43315	0.159552	-0.639159	0.0252448	0.185158	0.564534	-0.675491	0.0159176	-0.181516	0.572351	0.496218	0.100829	0.300471	0.342644	-0.540686	0.0695118	0.562123	0.0571316	0.1739	0.588835	0.388811	0.211618	-0.205419	0.521861	0.431032	0.161832	0.409549	0.18613	0.545136	0.0668028	-0.0945789	0.770001	-0.220303	0.491433
ENSMUSG00000075054	17981330	17993349	Yae1 domain containing 1 [Source:MGI Symbol;Acc:MGI:1914258]	Yae1d1	protein_coding	-1	yellow	-0.124865	0.699014	-0.236836	0.458609	0.388128	0.212493	-0.796442	0.00193362	-0.489094	0.106595	0.486121	0.109065	-0.826131	0.000927218	-0.171356	0.594382	0.721821	0.00803824	0.644131	0.0237791	-0.549169	0.0644114	0.902796	5.794e-05	0.329149	0.29616	0.514111	0.0872768	-0.508818	0.0911486	0.653887	0.0210843	0.634565	0.0266561	0.69425	0.0122453	-0.396971	0.201349	-0.00295581	0.992726
ENSMUSG00000031618	76899442	77245012	nuclear receptor subfamily 3, group C, member 2 [Source:MGI Symbol;Acc:MGI:99459]	Nr3c2	protein_coding	1	yellow	-0.102009	0.752414	-0.61598	0.0329521	0.0953311	0.768216	-0.668146	0.0175558	-0.268449	0.398865	0.188589	0.55721	-0.701201	0.0110586	-0.428088	0.165036	0.796407	0.00193515	0.433295	0.159397	-0.454447	0.137754	0.724311	0.00772058	0.485845	0.109297	0.019865	0.951139	-0.224635	0.482733	0.470689	0.122495	0.651392	0.0217512	0.451748	0.140403	-0.0343534	0.915591	0.277731	0.382112
ENSMUSG00000085133	121248706	121253971	RIKEN cDNA B930095G15 gene [Source:MGI Symbol;Acc:MGI:2443701]	B930095G15Rik	sense_intronic	1	yellow	0.0795316	0.805919	-0.504859	0.0941198	0.00495509	0.987806	-0.537968	0.0712034	-0.309436	0.327713	0.180139	0.575317	-0.771857	0.00327036	-0.634188	0.0267745	0.760654	0.00407194	0.621558	0.0309609	-0.702607	0.0108294	0.754419	0.00457809	0.68441	0.0140828	0.268251	0.399226	-0.444786	0.147388	0.33166	0.292268	0.780064	0.00276394	0.55547	0.0607949	0.0112718	0.972266	0.100452	0.756091
ENSMUSG00000022684	13671858	13703612	bifunctional apoptosis regulator [Source:MGI Symbol;Acc:MGI:1914368]	Bfar	protein_coding	1	yellow	-0.444849	0.147323	0.12962	0.688052	0.114826	0.72233	-0.429984	0.162969	-0.752939	0.00470484	0.431189	0.161663	-0.893901	8.83954e-05	-0.150877	0.639742	0.569132	0.0534421	0.42657	0.166704	-0.59161	0.0427372	0.757484	0.00432369	0.113549	0.725312	0.448397	0.143738	-0.491567	0.104569	0.671386	0.0168185	0.271568	0.393195	0.543219	0.0679606	-0.495469	0.101425	-0.164132	0.610243
ENSMUSG00000084145	59474284	59475765	predicted gene 12263 [Source:MGI Symbol;Acc:MGI:3650086]	Gm12263	processed_pseudogene	-1	yellow	-0.585884	0.0453055	-0.0541736	0.867202	0.337663	0.283083	-0.557242	0.0598036	-0.757255	0.00434227	0.557854	0.0594639	-0.822514	0.00102113	0.13661	0.672039	0.481461	0.113012	0.330562	0.293966	-0.453135	0.139038	0.728966	0.00715195	-0.139349	0.665795	0.247873	0.43729	-0.240134	0.452188	0.762053	0.00396446	0.319507	0.311372	0.510597	0.0898348	-0.489351	0.106384	-0.0985561	0.760573
ENSMUSG00000071037	85090552	85458588	calmodulin-lysine N-methyltransferase [Source:MGI Symbol;Acc:MGI:1920832]	Camkmt	protein_coding	1	yellow	-0.462605	0.129944	-0.101289	0.754112	0.230145	0.471767	-0.511886	0.0888903	-0.762801	0.00390793	0.371076	0.235012	-0.791642	0.00215387	-0.0698252	0.829277	0.530625	0.0759143	0.352503	0.26109	-0.336316	0.285129	0.739244	0.0060082	0.0989143	0.759726	0.349091	0.266057	-0.394942	0.203874	0.549308	0.0643302	0.200664	0.531747	0.384435	0.217254	-0.441527	0.150733	0.148855	0.644286
ENSMUSG00000021676	95627174	95892483	IQ motif containing GTPase activating protein 2 [Source:MGI Symbol;Acc:MGI:2449975]	Iqgap2	protein_coding	-1	yellow	-0.395391	0.203315	-0.180989	0.573486	0.0709584	0.826543	-0.422697	0.171006	-0.624515	0.0299413	0.344514	0.272802	-0.717791	0.00857302	-0.0923474	0.775303	0.449444	0.14269	0.280196	0.377724	-0.583486	0.0464123	0.580463	0.0478354	0.0805546	0.803465	0.125379	0.697828	0.047719	0.882922	0.534711	0.0732673	0.426212	0.167098	0.550493	0.0636397	0.0135173	0.966743	-0.201923	0.529122
ENSMUSG00000082876	23517362	23518440	predicted gene 11889 [Source:MGI Symbol;Acc:MGI:3651112]	Gm11889	processed_pseudogene	-1	yellow	-0.321979	0.307432	-0.178074	0.579779	0.350529	0.263956	-0.578849	0.0486072	-0.686004	0.0137722	0.50085	0.0971939	-0.719913	0.00828824	-0.0246407	0.93941	0.244549	0.443659	0.409479	0.186213	-0.383714	0.218191	0.626847	0.0291545	0.049803	0.877842	0.173475	0.589762	-0.252658	0.428198	0.441361	0.150905	0.370626	0.235625	0.299788	0.343797	-0.232662	0.466797	0.0344622	0.915325
ENSMUSG00000028161	136670124	136937727	protein phosphatase 3, catalytic subunit, alpha isoform [Source:MGI Symbol;Acc:MGI:107164]	Ppp3ca	protein_coding	1	yellow	-0.226302	0.479402	-0.139813	0.66474	0.229196	0.473647	-0.683045	0.014353	-0.460494	0.131937	0.400474	0.197037	-0.85512	0.000392137	-0.241821	0.448919	0.821609	0.00104574	0.548215	0.0649716	-0.55009	0.0638739	0.879385	0.00016364	0.316569	0.316092	0.440551	0.151744	-0.563486	0.0564005	0.726706	0.00742397	0.504704	0.0942375	0.640953	0.0247086	-0.503974	0.0947926	0.0020074	0.99506
ENSMUSG00000034591	83230848	83337882	solute carrier family 41, member 2 [Source:MGI Symbol;Acc:MGI:2442940]	Slc41a2	protein_coding	-1	yellow	0.209743	0.512937	-0.316402	0.316362	0.170631	0.595968	-0.609269	0.0354674	-0.17481	0.586856	0.152952	0.635092	-0.65232	0.0215013	-0.534986	0.0730913	0.611286	0.0346975	0.649473	0.0222743	-0.616161	0.0328859	0.739337	0.00599848	0.679797	0.0150111	0.485227	0.109816	-0.682237	0.0145148	0.225598	0.480807	0.668855	0.0173925	0.46653	0.126291	-0.204464	0.523839	-0.0196771	0.951601
ENSMUSG00000060301	79064374	79097600	RIKEN cDNA 2610008E11 gene [Source:MGI Symbol;Acc:MGI:1919378]	2610008E11Rik	protein_coding	-1	yellow	-0.0816264	0.800896	-0.385948	0.215296	0.114976	0.72198	-0.567413	0.0543312	-0.234385	0.463409	0.192442	0.549032	-0.713972	0.00910397	-0.406709	0.189502	0.681792	0.0146043	0.481064	0.113353	-0.712144	0.0093666	0.698583	0.0114951	0.447836	0.144301	0.177107	0.581873	-0.375298	0.229311	0.434487	0.158123	0.730381	0.00698547	0.532855	0.0744613	-0.125794	0.696868	-0.157678	0.624544
ENSMUSG00000022995	181896384	182019990	ENAH actin regulator [Source:MGI Symbol;Acc:MGI:108360]	Enah	protein_coding	-1	yellow	-0.307584	0.330768	-0.142748	0.658076	0.217156	0.4978	-0.399469	0.198269	-0.652083	0.0215648	0.397686	0.200465	-0.55966	0.0584695	0.0504225	0.876333	0.319922	0.31071	0.318376	0.313186	-0.208095	0.51633	0.558406	0.0591586	0.0178912	0.95599	0.454698	0.137509	-0.230263	0.471533	0.425826	0.167525	0.190269	0.553637	0.393674	0.205461	-0.34205	0.276475	0.184061	0.566884
ENSMUSG00000050786	49319274	49341582	coiled-coil domain containing 126 [Source:MGI Symbol;Acc:MGI:1889376]	Ccdc126	protein_coding	1	yellow	-0.128808	0.68992	-0.262014	0.410693	0.173107	0.590563	-0.510799	0.0896861	-0.198886	0.535467	0.0949355	0.769154	-0.457494	0.134802	-0.1873	0.559958	0.409286	0.186441	0.321519	0.308163	-0.514326	0.0871217	0.466877	0.125971	0.231296	0.46949	0.300894	0.341931	-0.350301	0.264289	0.274171	0.388493	0.62266	0.0305781	0.404013	0.192738	-0.188261	0.557908	-0.259683	0.415021
ENSMUSG00000038175	45389742	45412022	myosin regulatory light chain interacting protein [Source:MGI Symbol;Acc:MGI:2388271]	Mylip	protein_coding	1	yellow	-0.108741	0.73657	-0.201076	0.530888	0.161792	0.615414	-0.545785	0.066414	-0.550944	0.0633776	0.420324	0.173677	-0.907535	4.54991e-05	-0.432659	0.160079	0.609226	0.035484	0.640717	0.0247787	-0.678772	0.0152235	0.823609	0.000991973	0.447511	0.144628	0.320596	0.309633	-0.579765	0.0481684	0.491836	0.104351	0.567876	0.0540906	0.490171	0.10571	-0.282028	0.37448	0.0156634	0.961466
ENSMUSG00000021388	49544443	49567565	asporin [Source:MGI Symbol;Acc:MGI:1913945]	Aspn	protein_coding	1	yellow	-0.280532	0.377127	0.126698	0.694781	0.226026	0.479952	-0.587466	0.044585	-0.445611	0.146548	0.279665	0.378667	-0.726139	0.00749345	-0.109617	0.734514	0.673021	0.0164554	0.431141	0.161715	-0.525696	0.0791927	0.764685	0.0037681	0.1991	0.535017	0.636193	0.0261494	-0.632715	0.0272402	0.63245	0.0273248	0.34343	0.274415	0.609779	0.0352715	-0.617122	0.0325373	-0.261566	0.411523
ENSMUSG00000039789	3858321	3884561	zinc finger protein 597 [Source:MGI Symbol;Acc:MGI:1918313]	Zfp597	protein_coding	-1	yellow	-0.271086	0.394067	-0.0743841	0.818289	0.324701	0.303125	-0.706559	0.0102041	-0.223321	0.485364	0.187537	0.559451	-0.374139	0.230868	0.210522	0.511337	0.646645	0.0230621	0.224985	0.482033	-0.199567	0.534042	0.581064	0.0475501	-0.00580983	0.985703	0.654317	0.0209708	-0.254805	0.424148	0.633042	0.0271365	0.365879	0.242147	0.687241	0.0135347	-0.504417	0.094456	-0.166954	0.604029
ENSMUSG00000051285	7088920	7173628	protein-L-isoaspartate (D-aspartate) O-methyltransferase domain containing 1 [Source:MGI Symbol;Acc:MGI:2441773]	Pcmtd1	protein_coding	1	yellow	-0.401673	0.195574	-0.354969	0.257536	0.282749	0.373207	-0.720327	0.00823357	-0.563313	0.0564929	0.395822	0.202777	-0.802467	0.00168208	-0.0791977	0.80672	0.810221	0.00139617	0.404588	0.192045	-0.413858	0.181085	0.826573	0.000916202	0.159609	0.620253	0.228416	0.475196	-0.225269	0.481464	0.740427	0.00588596	0.511631	0.089077	0.621144	0.0311059	-0.317148	0.315158	0.141819	0.660183
ENSMUSG00000030844	128373621	128418758	regulator of G-protein signalling 10 [Source:MGI Symbol;Acc:MGI:1915115]	Rgs10	protein_coding	-1	yellow	0.0453873	0.888611	-0.372753	0.232738	0.289103	0.362091	-0.796116	0.00194803	-0.148301	0.645534	0.0640633	0.843204	-0.52676	0.0784771	-0.318879	0.312379	0.579045	0.048513	0.440802	0.151483	-0.388768	0.211673	0.655484	0.0206653	0.499827	0.0979896	0.286325	0.366929	-0.428735	0.164329	0.250751	0.43181	0.589301	0.0437602	0.371432	0.234529	-0.111897	0.729174	0.00133417	0.996717
ENSMUSG00000063172	107253593	107279938	heat shock protein family B (small), member 11 [Source:MGI Symbol;Acc:MGI:1920188]	Hspb11	protein_coding	1	yellow	-0.536537	0.0721052	0.266796	0.401885	0.406325	0.189961	-0.640454	0.0248568	-0.489772	0.106037	0.360852	0.249169	-0.579229	0.0484246	0.293404	0.354667	0.420068	0.173966	0.181869	0.571593	-0.220475	0.491086	0.621727	0.0309021	-0.216506	0.499118	0.48781	0.107657	-0.466064	0.126721	0.719176	0.00838636	0.0558075	0.86323	0.398265	0.19975	-0.807608	0.00148799	-0.259586	0.415201
ENSMUSG00000048572	24674008	24682233	transmembrane protein 252 [Source:MGI Symbol;Acc:MGI:3583948]	Tmem252	protein_coding	1	yellow	0.0772563	0.811382	-0.228729	0.474574	-0.137957	0.668966	-0.308547	0.329178	-0.403199	0.193721	0.105249	0.744775	-0.72883	0.00716815	-0.662468	0.0189045	0.59556	0.0410267	0.571373	0.0522983	-0.71321	0.0092128	0.648229	0.0226185	0.668644	0.017441	0.437757	0.154662	-0.53992	0.0699863	0.196263	0.54097	0.56167	0.0573762	0.483184	0.111542	-0.0256348	0.93697	-0.023066	0.943276
ENSMUSG00000027784	69316861	69560802	protein phosphatase 1 (formerly 2C)-like [Source:MGI Symbol;Acc:MGI:2139740]	Ppm1l	protein_coding	1	yellow	-0.150395	0.640825	0.056848	0.860702	0.136487	0.672318	-0.440311	0.151994	-0.484775	0.110196	0.415235	0.179491	-0.769399	0.00343498	-0.241459	0.44962	0.60611	0.0366976	0.563566	0.0563577	-0.572651	0.0516541	0.748703	0.00508253	0.270797	0.394592	0.643761	0.0238859	-0.687694	0.0134484	0.596819	0.0404918	0.405279	0.191214	0.596212	0.0407491	-0.590843	0.043075	-0.0966646	0.765053
ENSMUSG00000020794	72607283	72686481	ubiquitin-conjugating enzyme E2G 1 [Source:MGI Symbol;Acc:MGI:1914378]	Ube2g1	protein_coding	1	yellow	-0.473723	0.119773	-0.000945259	0.997674	0.468455	0.124525	-0.722512	0.0079491	-0.700672	0.0111458	0.513781	0.0875143	-0.855171	0.000391483	0.0990941	0.7593	0.635968	0.026219	0.475017	0.118625	-0.527494	0.077986	0.868668	0.000245804	0.00508951	0.987475	0.510843	0.0896538	-0.477515	0.116427	0.762834	0.0039054	0.449982	0.142155	0.662654	0.018859	-0.591867	0.0426241	-0.208732	0.515018
ENSMUSG00000051379	140650914	140671469	fibronectin leucine rich transmembrane protein 3 [Source:MGI Symbol;Acc:MGI:1918686]	Flrt3	protein_coding	-1	yellow	-0.110234	0.733069	0.0388269	0.904641	0.378519	0.225016	-0.710062	0.00967253	-0.38261	0.219631	0.4725	0.120865	-0.769609	0.00342066	-0.102833	0.750469	0.641245	0.024622	0.615617	0.0330849	-0.629512	0.0282735	0.842006	0.000590927	0.247532	0.437939	0.645145	0.0234879	-0.637546	0.025734	0.679542	0.0150638	0.558046	0.0593578	0.717361	0.00863163	-0.569901	0.0530475	-0.300437	0.342701
ENSMUSG00000003154	122819914	122845366	forkhead box J2 [Source:MGI Symbol;Acc:MGI:1926805]	Foxj2	protein_coding	1	yellow	-0.0719792	0.824082	0.0614989	0.849416	0.106332	0.742228	-0.385871	0.215395	-0.546634	0.0659076	0.509018	0.0910003	-0.829046	0.000856482	-0.274589	0.387742	0.58878	0.0439934	0.657057	0.0202588	-0.71771	0.00858405	0.78443	0.00252018	0.322212	0.307062	0.696746	0.0118088	-0.592145	0.0425026	0.605086	0.0371029	0.483907	0.110929	0.73912	0.00602109	-0.444582	0.147596	-0.186127	0.562462
ENSMUSG00000043336	57353093	57573126	filamin A interacting protein 1-like [Source:MGI Symbol;Acc:MGI:1925999]	Filip1l	protein_coding	1	yellow	-0.44823	0.143905	-0.0426197	0.895369	0.485419	0.109654	-0.723393	0.00783652	-0.633312	0.0270506	0.519268	0.083612	-0.728257	0.00723653	0.204419	0.523933	0.611977	0.0344366	0.40308	0.193865	-0.287784	0.364385	0.815807	0.00121455	-0.0614608	0.849508	0.533605	0.0739771	-0.415424	0.179274	0.771796	0.00327441	0.300478	0.342632	0.599154	0.0395133	-0.665997	0.0180577	0.0136621	0.966387
ENSMUSG00000020176	11930508	12038683	growth factor receptor bound protein 10 [Source:MGI Symbol;Acc:MGI:103232]	Grb10	protein_coding	-1	yellow	-0.0573066	0.859588	-0.246025	0.440824	0.0439406	0.892143	-0.41973	0.174349	-0.295317	0.35139	0.0941071	0.771121	-0.630477	0.0279593	-0.470024	0.123097	0.537924	0.0712311	0.41004	0.185552	-0.371602	0.234298	0.628976	0.028449	0.488218	0.107319	0.259443	0.415467	-0.646439	0.0231201	0.24123	0.450064	0.296025	0.350182	0.166279	0.605513	-0.364165	0.244528	0.233053	0.466027
ENSMUSG00000039239	186622792	186705989	transforming growth factor, beta 2 [Source:MGI Symbol;Acc:MGI:98726]	Tgfb2	protein_coding	-1	yellow	-0.319328	0.311659	-0.28017	0.37777	0.268584	0.398618	-0.566289	0.0549177	-0.450124	0.142013	0.193	0.547851	-0.622128	0.0307624	-0.118856	0.712942	0.585102	0.0456643	0.324305	0.303749	-0.30126	0.341316	0.673653	0.0163165	0.195707	0.542141	0.304472	0.335937	-0.449822	0.142314	0.424513	0.168981	0.352749	0.260734	0.33509	0.287	-0.430416	0.162499	0.145565	0.651703
ENSMUSG00000048915	62604184	62881317	ephrin A5 [Source:MGI Symbol;Acc:MGI:107444]	Efna5	protein_coding	-1	yellow	-0.447792	0.144346	0.154443	0.631757	0.466902	0.125949	-0.718418	0.00848814	-0.549648	0.0641314	0.373234	0.232088	-0.712842	0.00926571	0.170201	0.596909	0.56471	0.0557495	0.375905	0.228496	-0.515402	0.0863493	0.765728	0.00369241	-0.0365941	0.910105	0.592353	0.0424115	-0.492402	0.103891	0.693343	0.0124068	0.393178	0.206084	0.648798	0.0224606	-0.61825	0.032131	-0.447407	0.144732
ENSMUSG00000046794	35375739	35388139	protein phosphatase 1, regulatory subunit 3B [Source:MGI Symbol;Acc:MGI:2177268]	Ppp1r3b	protein_coding	1	yellow	-0.401956	0.195229	-0.0676327	0.834571	0.181945	0.571429	-0.420945	0.172976	-0.593048	0.0421088	0.460573	0.131861	-0.675139	0.0159934	0.00521869	0.987158	0.503613	0.0950684	0.310024	0.326746	-0.174611	0.587289	0.650579	0.0219718	-0.00915127	0.977482	0.334131	0.288468	-0.40014	0.197446	0.657808	0.0200665	0.0849899	0.792847	0.338222	0.282236	-0.628269	0.028682	0.301127	0.341539
ENSMUSG00000052917	56048338	56190012	SUMO1/sentrin specific peptidase 7 [Source:MGI Symbol;Acc:MGI:1913565]	Senp7	protein_coding	1	yellow	-0.225848	0.480308	-0.175724	0.584872	0.208364	0.515775	-0.376966	0.227081	-0.600545	0.0389384	0.409115	0.186643	-0.721271	0.00810973	-0.183489	0.568112	0.194497	0.544689	0.421295	0.172581	-0.604999	0.0371375	0.572965	0.0514967	0.170707	0.595802	0.109006	0.735947	-0.240052	0.452346	0.3008	0.34209	0.431491	0.161336	0.295872	0.350443	-0.0817045	0.800709	-0.153545	0.633765
ENSMUSG00000096269	21119149	21119522	ribosomal protein L31, pseudogene 21 [Source:MGI Symbol;Acc:MGI:3644652]	Rpl31-ps21	processed_pseudogene	-1	yellow	-0.403531	0.19332	-0.217588	0.496923	0.375425	0.22914	-0.825368	0.000946437	-0.448506	0.143628	0.159153	0.621264	-0.60161	0.038502	0.0315219	0.922529	0.687791	0.01343	0.265785	0.40374	-0.29152	0.357909	0.695607	0.0120066	0.115248	0.721346	0.315593	0.317669	-0.259263	0.415803	0.555395	0.0608369	0.445757	0.146401	0.515557	0.086238	-0.296856	0.348767	-0.0699875	0.828885
ENSMUSG00000043705	73306464	73400866	calpain 13 [Source:MGI Symbol;Acc:MGI:2685789]	Capn13	protein_coding	-1	yellow	0.134577	0.676683	-0.2923	0.356564	0.219049	0.493966	-0.638166	0.0255451	-0.177786	0.580402	0.318085	0.313652	-0.595712	0.0409619	-0.330171	0.294574	0.640826	0.0247464	0.578641	0.0487074	-0.329394	0.29578	0.729714	0.0070636	0.480792	0.113587	0.455577	0.136654	-0.577373	0.0493211	0.442726	0.149497	0.464423	0.128243	0.453674	0.13851	-0.390788	0.209103	0.26187	0.410959
ENSMUSG00000022836	34745210	35002420	myosin, light polypeptide kinase [Source:MGI Symbol;Acc:MGI:894806]	Mylk	protein_coding	1	yellow	0.164938	0.608465	-0.264701	0.405733	0.017763	0.956305	-0.439226	0.153124	-0.297234	0.348123	0.188621	0.557142	-0.743743	0.00555339	-0.634618	0.0266395	0.660657	0.01935	0.662787	0.0188266	-0.649747	0.022199	0.752619	0.00473265	0.705684	0.0103401	0.463757	0.128865	-0.692551	0.0125491	0.263624	0.407717	0.574602	0.050681	0.468309	0.124658	-0.203461	0.525922	0.0842026	0.794729
ENSMUSG00000038718	34171457	34373142	pre B cell leukemia homeobox 3 [Source:MGI Symbol;Acc:MGI:97496]	Pbx3	protein_coding	-1	yellow	0.0656745	0.839305	-0.121998	0.705648	0.185388	0.564043	-0.532948	0.0744014	-0.430095	0.162847	0.329055	0.296307	-0.779906	0.00277308	-0.414674	0.18014	0.662679	0.018853	0.699017	0.0114218	-0.639569	0.0251215	0.829564	0.000844357	0.54462	0.0671131	0.66488	0.0183226	-0.7088	0.0098616	0.408773	0.187047	0.560589	0.0579619	0.62472	0.0298717	-0.353844	0.259154	-0.0346214	0.914935
ENSMUSG00000022055	68083863	68089095	neurofilament, light polypeptide [Source:MGI Symbol;Acc:MGI:97313]	Nefl	protein_coding	1	yellow	-0.183883	0.567266	-0.271938	0.392523	0.357778	0.25352	-0.773252	0.00317967	-0.0318089	0.921826	0.133944	0.678132	-0.296881	0.348723	0.174321	0.58792	0.656612	0.0203733	0.187798	0.558896	-0.136426	0.672458	0.545653	0.066493	0.0517027	0.873215	0.415904	0.17872	-0.146128	0.650431	0.57894	0.0485639	0.428371	0.164727	0.585748	0.0453678	-0.384198	0.217562	-0.0619484	0.848326
ENSMUSG00000062078	10202601	10319854	quaking [Source:MGI Symbol;Acc:MGI:97837]	Qk	protein_coding	-1	yellow	-0.160777	0.617662	-0.0309478	0.923937	0.361073	0.248858	-0.693887	0.0123097	-0.194341	0.54502	0.18934	0.555613	-0.558037	0.0593626	-0.0640829	0.843156	0.487153	0.108204	0.355601	0.256629	-0.487094	0.108253	0.643001	0.0241068	0.202867	0.527156	0.358263	0.252831	-0.479574	0.114637	0.448191	0.143944	0.439243	0.153105	0.429642	0.16334	-0.41525	0.179475	-0.357672	0.253671
ENSMUSG00000047205	3895240	3901296	dual specificity phosphatase 18 [Source:MGI Symbol;Acc:MGI:1922469]	Dusp18	protein_coding	1	yellow	0.0352631	0.913363	-0.324714	0.303105	0.226257	0.479492	-0.62037	0.0313777	-0.385439	0.215953	0.354422	0.258322	-0.75331	0.00467281	-0.384064	0.217736	0.757883	0.00429134	0.66625	0.017998	-0.466689	0.126145	0.846246	0.000519653	0.517791	0.0846511	0.526177	0.0788687	-0.638179	0.0255411	0.479549	0.114659	0.570324	0.0528318	0.570131	0.0529301	-0.380157	0.22285	0.252539	0.428423
ENSMUSG00000031812	121590361	121598760	microtubule-associated protein 1 light chain 3 beta [Source:MGI Symbol;Acc:MGI:1914693]	Map1lc3b	protein_coding	1	yellow	-0.319768	0.310955	-0.178547	0.578757	0.0563068	0.862017	-0.48909	0.106599	-0.422601	0.171114	0.284918	0.369393	-0.597333	0.0402749	-0.154383	0.631891	0.536832	0.0719187	0.209505	0.513427	-0.062264	0.847562	0.56223	0.0570738	0.127967	0.691857	0.0621216	0.847906	-0.273107	0.390411	0.564489	0.0558667	0.0470779	0.884486	0.17384	0.588966	-0.402428	0.194656	0.433477	0.159202
ENSMUSG00000028402	81278500	81442815	multiple PDZ domain protein [Source:MGI Symbol;Acc:MGI:1343489]	Mpdz	protein_coding	-1	yellow	0.0625388	0.846896	-0.209545	0.513345	0.068882	0.831554	-0.379747	0.223391	-0.231466	0.469156	0.151122	0.639192	-0.520481	0.082766	-0.355037	0.257438	0.545749	0.0664357	0.449275	0.142859	-0.303324	0.337854	0.620847	0.0312098	0.463088	0.129491	0.51345	0.0877541	-0.605333	0.0370048	0.270761	0.394657	0.268931	0.397986	0.333444	0.289522	-0.412042	0.183201	0.248617	0.435868
ENSMUSG00000076563	69726573	69727138	immunoglobulin kappa variable 5-48 [Source:MGI Symbol;Acc:MGI:3642817]	Igkv5-48	IG_V_gene	-1	yellow	0.0665291	0.837238	-0.359662	0.250848	0.163948	0.610649	-0.619768	0.0315901	0.02025	0.950193	0.000185403	0.999544	-0.434114	0.158521	-0.299708	0.343932	0.711655	0.00943775	0.372229	0.233447	-0.357758	0.253549	0.625911	0.0294683	0.482364	0.11224	0.383598	0.218343	-0.445641	0.146519	0.324604	0.303279	0.498554	0.0989845	0.453147	0.139026	-0.273398	0.389887	0.0383699	0.905759
ENSMUSG00000022788	16416917	16600549	FYVE, RhoGEF and PH domain containing 4 [Source:MGI Symbol;Acc:MGI:2183747]	Fgd4	protein_coding	-1	yellow	-0.0659218	0.838707	-0.400181	0.197396	0.111324	0.730516	-0.572636	0.0516616	-0.462132	0.130388	0.315549	0.31774	-0.844589	0.00054667	-0.511795	0.0889568	0.702781	0.0108013	0.595504	0.0410507	-0.573581	0.0511884	0.790744	0.00219709	0.533085	0.0743125	0.168397	0.600859	-0.470563	0.122609	0.433945	0.158701	0.607884	0.0360031	0.437774	0.154645	-0.131463	0.683818	0.217015	0.498085
ENSMUSG00000030249	142587862	142702315	ATP-binding cassette, sub-family C (CFTR/MRP), member 9 [Source:MGI Symbol;Acc:MGI:1352630]	Abcc9	protein_coding	-1	yellow	-0.107794	0.738792	0.00848699	0.979116	0.267659	0.400307	-0.50265	0.0958057	-0.561181	0.0576407	0.38964	0.210561	-0.809923	0.00140644	-0.263683	0.407608	0.550493	0.0636396	0.623633	0.030243	-0.589876	0.0435036	0.823293	0.00100032	0.366586	0.24117	0.634221	0.0267642	-0.731703	0.00683266	0.447985	0.144151	0.404332	0.192353	0.52613	0.0789001	-0.502729	0.0957453	-0.0823805	0.79909
ENSMUSG00000024049	71002633	71126856	myomesin 1 [Source:MGI Symbol;Acc:MGI:1341430]	Myom1	protein_coding	1	yellow	0.113961	0.72435	-0.551436	0.0630933	0.0214942	0.947137	-0.460986	0.13147	-0.24926	0.434644	0.137364	0.670317	-0.652658	0.0214109	-0.604471	0.0373478	0.689376	0.0131318	0.554657	0.0612534	-0.439148	0.153205	0.691943	0.0126591	0.666234	0.0180018	0.23202	0.468062	-0.517959	0.084532	0.22833	0.475367	0.567834	0.0541125	0.334903	0.287285	-0.117656	0.715733	0.408145	0.187792
ENSMUSG00000050315	123076519	123236149	synaptopodin 2 [Source:MGI Symbol;Acc:MGI:2153070]	Synpo2	protein_coding	-1	yellow	-0.192437	0.549043	-0.179658	0.576355	0.0410424	0.899224	-0.297508	0.347659	-0.673399	0.0163721	0.41031	0.185233	-0.770435	0.00336484	-0.311805	0.323828	0.475498	0.118199	0.485764	0.109364	-0.411857	0.183418	0.674994	0.0160247	0.296531	0.34932	0.34388	0.273746	-0.415486	0.179202	0.418916	0.175273	0.264457	0.406182	0.374194	0.230793	-0.282852	0.373026	0.290598	0.359501
ENSMUSG00000033047	79075179	79094405	eukaryotic translation initiation factor 3, subunit L [Source:MGI Symbol;Acc:MGI:2386251]	Eif3l	protein_coding	1	yellow	0.166654	0.604688	0.107209	0.740167	0.694255	0.0122443	-0.564577	0.05582	0.141385	0.661169	0.401678	0.195568	-0.159482	0.620535	0.281628	0.375187	0.543094	0.0680368	0.440596	0.151697	0.0938482	0.771736	0.488599	0.107004	0.00424489	0.989554	0.31719	0.315091	-0.440499	0.151798	0.506781	0.0926698	0.269067	0.397738	0.44718	0.144962	-0.520069	0.0830527	0.0852471	0.792232
ENSMUSG00000052889	122288751	122634402	protein kinase C, beta [Source:MGI Symbol;Acc:MGI:97596]	Prkcb	protein_coding	1	yellow	0.0952524	0.768402	-0.250525	0.432239	0.308752	0.32884	-0.64206	0.0243819	-0.243636	0.445416	0.373717	0.231435	-0.61508	0.0332817	-0.278925	0.379982	0.422027	0.171757	0.595944	0.0408632	-0.517443	0.084897	0.653417	0.0212087	0.385626	0.215712	0.341231	0.277702	-0.501462	0.0967206	0.357786	0.253509	0.637982	0.0256012	0.431969	0.160821	-0.233656	0.464841	-0.0538322	0.868033
ENSMUSG00000020986	58958383	59012017	SEC23 homolog A, COPII coat complex component [Source:MGI Symbol;Acc:MGI:1349635]	Sec23a	protein_coding	-1	yellow	-0.416469	0.178071	0.0312272	0.923252	0.373067	0.232313	-0.710057	0.00967325	-0.543517	0.0677802	0.447959	0.144177	-0.750793	0.00489348	0.110424	0.732624	0.7672	0.00358748	0.407136	0.188993	-0.380779	0.222031	0.834332	0.00073893	0.0192204	0.952723	0.563433	0.0564291	-0.436018	0.156496	0.845526	0.000531261	0.336151	0.285381	0.713173	0.00921805	-0.647909	0.0227074	-0.0968798	0.764543
ENSMUSG00000081787	116527843	116528490	predicted gene 13991 [Source:MGI Symbol;Acc:MGI:3651689]	Gm13991	processed_pseudogene	-1	yellow	-0.212892	0.506482	-0.266626	0.402197	0.382034	0.220385	-0.704322	0.0105547	-0.565816	0.0551661	0.527952	0.0776802	-0.820717	0.00107044	-0.0988933	0.759775	0.734949	0.00646801	0.593931	0.0417262	-0.459369	0.133006	0.889036	0.000109675	0.237787	0.456752	0.449716	0.14242	-0.425242	0.168171	0.6921	0.0126306	0.543371	0.0678687	0.672789	0.0165067	-0.416036	0.178569	0.135656	0.674216
ENSMUSG00000034083	91878053	91899843	coiled-coil domain containing 174 [Source:MGI Symbol;Acc:MGI:2444652]	Ccdc174	protein_coding	1	yellow	-0.311493	0.324339	-0.288392	0.363326	0.469748	0.123347	-0.856423	0.000375679	-0.309657	0.32735	0.268316	0.399108	-0.620077	0.0314811	0.0492439	0.879205	0.659874	0.0195452	0.336165	0.285359	-0.410947	0.184484	0.733696	0.00660697	0.119441	0.711583	0.205452	0.521793	-0.237705	0.456913	0.602252	0.0382408	0.568712	0.0536582	0.544312	0.0672991	-0.29982	0.343743	-0.169197	0.599106
ENSMUSG00000028414	53713998	53777890	fukutin [Source:MGI Symbol;Acc:MGI:2179507]	Fktn	protein_coding	1	yellow	0.0971393	0.763928	-0.325147	0.302423	0.267529	0.400544	-0.716636	0.00873111	-0.193271	0.547278	0.336192	0.285319	-0.705078	0.0104352	-0.355822	0.256313	0.826596	0.000915646	0.68982	0.0130492	-0.611949	0.034447	0.829155	0.000853923	0.509253	0.0908264	0.544254	0.0673341	-0.610111	0.0351443	0.555306	0.0608872	0.80047	0.00176249	0.733271	0.00665459	-0.350424	0.264111	-0.0233721	0.942525
ENSMUSG00000040852	84511895	84622138	pleckstrin homology domain containing, family H (with MyTH4 domain) member 2 [Source:MGI Symbol;Acc:MGI:2146813]	Plekhh2	protein_coding	1	yellow	-0.493426	0.103063	-0.0576413	0.858775	0.577293	0.04936	-0.794313	0.00202904	-0.747962	0.00515089	0.611601	0.0345784	-0.845887	0.000525425	0.165533	0.607155	0.518481	0.0841646	0.459641	0.132747	-0.352161	0.261587	0.848775	0.000480453	-0.0684176	0.832675	0.32741	0.298872	-0.427801	0.165351	0.750685	0.00490309	0.361178	0.248709	0.482416	0.112196	-0.58623	0.0451472	0.000418219	0.998971
ENSMUSG00000038530	169741477	169747642	regulator of G-protein signaling 4 [Source:MGI Symbol;Acc:MGI:108409]	Rgs4	protein_coding	-1	yellow	0.198705	0.535845	-0.180818	0.573854	0.189758	0.554723	-0.533264	0.0741974	-0.218838	0.494393	0.333007	0.290193	-0.562384	0.0569912	-0.311433	0.324437	0.62529	0.0296781	0.664497	0.0184141	-0.455364	0.136861	0.703339	0.0107115	0.477308	0.116608	0.760418	0.00409028	-0.649819	0.0221793	0.413268	0.181771	0.579257	0.0484114	0.654727	0.0208631	-0.404718	0.191888	0.0712449	0.825852
ENSMUSG00000111080	30603195	30606634	predicted gene, 20300 [Source:MGI Symbol;Acc:MGI:5012485]	Gm20300	lincRNA	-1	yellow	-0.212644	0.506989	-0.3287	0.29686	0.434629	0.157971	-0.853968	0.000407142	-0.422392	0.171349	0.378906	0.224503	-0.778017	0.00288424	-0.161884	0.615209	0.775276	0.00305154	0.521763	0.0818775	-0.326384	0.300479	0.884559	0.000132617	0.307153	0.331482	0.275798	0.38557	-0.529992	0.07633	0.627316	0.028998	0.493017	0.103393	0.459673	0.132717	-0.466777	0.126064	0.24146	0.449618
ENSMUSG00000002808	19591706	19619927	ependymin related protein 1 (zebrafish) [Source:MGI Symbol;Acc:MGI:2145369]	Epdr1	protein_coding	-1	yellow	0.116225	0.719067	-0.239209	0.453983	0.313014	0.321856	-0.712591	0.00930183	-0.110807	0.731725	0.109388	0.735053	-0.50374	0.0949714	-0.305872	0.333605	0.524282	0.0801512	0.486267	0.108943	-0.345115	0.271912	0.660982	0.0192696	0.497819	0.0995625	0.412534	0.182626	-0.613636	0.0338154	0.234703	0.462785	0.466682	0.126151	0.319123	0.311987	-0.30775	0.330494	0.0304661	0.925118
ENSMUSG00000031523	36567751	36953143	deleted in liver cancer 1 [Source:MGI Symbol;Acc:MGI:1354949]	Dlc1	protein_coding	-1	yellow	0.31231	0.323004	-0.269779	0.396442	0.061725	0.848868	-0.449146	0.142988	-0.159498	0.620499	0.155822	0.628678	-0.648094	0.0226559	-0.637685	0.0256914	0.610897	0.034845	0.714768	0.00899141	-0.688164	0.0133593	0.711939	0.00939647	0.756948	0.0043674	0.571707	0.0521295	-0.743915	0.0055365	0.175073	0.586286	0.680761	0.0148135	0.512285	0.0885996	-0.182253	0.570765	-0.0235211	0.942159
ENSMUSG00000025584	81213596	81334533	phosphodiesterase 8A [Source:MGI Symbol;Acc:MGI:1277116]	Pde8a	protein_coding	1	yellow	-0.00738736	0.981821	-0.346617	0.26969	0.328471	0.297216	-0.644212	0.0237557	-0.318411	0.313129	0.329652	0.295379	-0.69612	0.0119172	-0.299779	0.343812	0.587452	0.0445915	0.564733	0.0557376	-0.409894	0.185723	0.784345	0.00252476	0.434928	0.157653	0.298049	0.346739	-0.573169	0.0513945	0.392276	0.20722	0.483654	0.111143	0.358875	0.251963	-0.364155	0.244542	0.210368	0.511655
ENSMUSG00000062604	23503264	23684617	serine/arginine-rich protein specific kinase 2 [Source:MGI Symbol;Acc:MGI:1201408]	Srpk2	protein_coding	-1	yellow	0.021219	0.947813	-0.218549	0.494978	0.388003	0.212653	-0.722725	0.00792187	-0.258018	0.418125	0.436762	0.15571	-0.678498	0.0152805	-0.209271	0.513908	0.578714	0.0486723	0.609586	0.0353455	-0.424093	0.169448	0.777779	0.0028985	0.346996	0.269133	0.400859	0.196566	-0.619786	0.031584	0.525513	0.0793166	0.540888	0.0693874	0.461985	0.130527	-0.479521	0.114683	0.0792459	0.806605
ENSMUSG00000023932	45391884	45433737	cell division cycle 5-like (S. pombe) [Source:MGI Symbol;Acc:MGI:1918952]	Cdc5l	protein_coding	-1	yellow	-0.420782	0.17316	0.138428	0.667892	0.30566	0.333958	-0.488313	0.10724	-0.790551	0.00220647	0.651478	0.0217277	-0.823111	0.00100514	0.118484	0.713806	0.441965	0.15028	0.471019	0.122197	-0.562995	0.0566629	0.730317	0.006993	-0.0836187	0.796126	0.508792	0.0911682	-0.271132	0.393985	0.761232	0.00402725	0.360379	0.249836	0.709478	0.00975972	-0.424138	0.169398	-0.261599	0.411461
ENSMUSG00000037712	45458795	45530118	fermitin family member 2 [Source:MGI Symbol;Acc:MGI:2385001]	Fermt2	protein_coding	-1	yellow	0.0530678	0.869893	-0.231216	0.46965	0.18831	0.557805	-0.498506	0.0990224	-0.447645	0.144493	0.351503	0.26254	-0.807915	0.00147695	-0.453562	0.138619	0.658078	0.0199979	0.709148	0.00980923	-0.637182	0.0258452	0.836076	0.000703015	0.556351	0.0603007	0.546343	0.0660811	-0.698814	0.0114561	0.384669	0.216951	0.586929	0.0448286	0.556916	0.0599853	-0.331497	0.292521	0.0747846	0.817325
ENSMUSG00000045613	36388084	36528414	cholinergic receptor, muscarinic 2, cardiac [Source:MGI Symbol;Acc:MGI:88397]	Chrm2	protein_coding	1	yellow	-0.170495	0.596264	-0.148124	0.645933	0.378437	0.225124	-0.667362	0.0177376	-0.610977	0.0348145	0.485	0.110006	-0.914565	3.10145e-05	-0.24401	0.444696	0.684044	0.014155	0.690989	0.0128333	-0.653953	0.0210667	0.924452	1.70558e-05	0.352602	0.260948	0.509702	0.0904942	-0.652561	0.0214367	0.579217	0.0484306	0.613082	0.0340222	0.632873	0.02719	-0.433089	0.159617	-0.0587608	0.856057
ENSMUSG00000039050	180119306	180162680	oxysterol binding protein-like 2 [Source:MGI Symbol;Acc:MGI:2442832]	Osbpl2	protein_coding	1	yellow	-0.365982	0.242005	-0.283649	0.371624	0.133093	0.680079	-0.549248	0.0643652	-0.596665	0.040557	0.331063	0.293192	-0.845865	0.000525777	-0.251955	0.429528	0.798112	0.00186119	0.423037	0.170626	-0.481385	0.113078	0.798114	0.00186112	0.265314	0.404606	0.202497	0.527926	-0.326084	0.30095	0.643713	0.0238999	0.445752	0.146406	0.540711	0.069497	-0.283308	0.372224	0.160435	0.618419
ENSMUSG00000029761	34598500	34775473	caldesmon 1 [Source:MGI Symbol;Acc:MGI:88250]	Cald1	protein_coding	1	yellow	-0.0240867	0.94077	0.0351628	0.913609	0.060243	0.852461	-0.279036	0.379785	-0.550347	0.0637245	0.341724	0.276963	-0.728212	0.00724189	-0.382462	0.219825	0.388327	0.212237	0.55877	0.0589578	-0.489512	0.106251	0.669735	0.0171914	0.409929	0.185682	0.543988	0.067495	-0.673849	0.0162737	0.296725	0.348988	0.21875	0.494571	0.3405	0.2788	-0.395224	0.203523	0.0849117	0.793033
ENSMUSG00000074733	61053840	61140840	zinc finger protein 950 [Source:MGI Symbol;Acc:MGI:2652824]	Zfp950	protein_coding	-1	yellow	0.155024	0.630459	-0.264087	0.406862	0.348107	0.267499	-0.805506	0.00156513	0.0133213	0.967225	0.18038	0.574798	-0.378296	0.225311	-0.133995	0.678015	0.61154	0.0346012	0.474087	0.119449	-0.274363	0.388147	0.615023	0.0333028	0.376515	0.227681	0.541893	0.0687698	-0.443471	0.148732	0.406215	0.190092	0.591163	0.0429337	0.56037	0.0580815	-0.30515	0.334806	-0.0179749	0.955784
ENSMUSG00000056050	183326725	183369553	melanoma inhibitory activity 3 [Source:MGI Symbol;Acc:MGI:2443183]	Mia3	protein_coding	-1	yellow	-0.396953	0.201372	0.0886486	0.784111	0.252766	0.427994	-0.431424	0.161409	-0.852991	0.000420224	0.547684	0.065285	-0.860352	0.000329283	-0.0473439	0.883837	0.308928	0.328549	0.447856	0.144281	-0.56735	0.0543638	0.698161	0.0115667	0.0460339	0.887033	0.306979	0.331769	-0.288257	0.363561	0.536052	0.0724127	0.272919	0.39075	0.457693	0.134611	-0.255938	0.42202	-0.179056	0.577657
ENSMUSG00000034898	79805094	80012851	filamin A interacting protein 1 [Source:MGI Symbol;Acc:MGI:1917848]	Filip1	protein_coding	-1	yellow	0.0590428	0.855373	-0.0790609	0.807049	0.0019341	0.99524	-0.274883	0.387213	-0.333105	0.290043	0.191764	0.550468	-0.673212	0.0164134	-0.437492	0.15494	0.587592	0.0445283	0.572064	0.0519492	-0.736958	0.00624969	0.68121	0.0147222	0.516559	0.0855235	0.63267	0.0272546	-0.594793	0.0413549	0.305408	0.334377	0.511944	0.0888481	0.617819	0.0322858	-0.263451	0.408036	-0.214993	0.502196
ENSMUSG00000020076	62615895	62651218	DEAD (Asp-Glu-Ala-Asp) box polypeptide 50 [Source:MGI Symbol;Acc:MGI:2182303]	Ddx50	protein_coding	-1	yellow	-0.317488	0.314612	-0.251742	0.42993	0.334739	0.287537	-0.748001	0.00514726	-0.531275	0.0754887	0.36146	0.248313	-0.751172	0.00485971	-0.104463	0.746627	0.729034	0.00714392	0.409386	0.186323	-0.222297	0.487421	0.816104	0.00120544	0.214708	0.502776	0.25353	0.426552	-0.400188	0.197386	0.637206	0.0258378	0.30693	0.331851	0.419504	0.174605	-0.430709	0.162181	0.310587	0.325822
ENSMUSG00000026768	12106632	12301922	integrin alpha 8 [Source:MGI Symbol;Acc:MGI:109442]	Itga8	protein_coding	-1	yellow	0.0392577	0.903588	-0.237242	0.457815	0.10957	0.734626	-0.549354	0.0643033	-0.222772	0.486465	0.181502	0.572382	-0.743759	0.0055518	-0.517544	0.0848256	0.732725	0.00671626	0.579912	0.0480979	-0.631417	0.0276556	0.770836	0.00333802	0.586396	0.0450714	0.344625	0.272639	-0.668859	0.0173916	0.397089	0.201204	0.577971	0.049031	0.465464	0.127277	-0.310056	0.326695	-0.0163955	0.959666
ENSMUSG00000039943	135659011	136014593	phospholipase C, beta 4 [Source:MGI Symbol;Acc:MGI:107464]	Plcb4	protein_coding	1	yellow	0.00790251	0.980554	-0.0160343	0.960554	0.241295	0.449938	-0.543363	0.0678734	-0.500913	0.0971451	0.42716	0.166055	-0.852945	0.000420847	-0.380801	0.222002	0.611725	0.0345315	0.727129	0.00737246	-0.663938	0.0185481	0.856764	0.000371465	0.475754	0.117974	0.628348	0.0286558	-0.785472	0.00246451	0.472067	0.121254	0.523064	0.0809823	0.581048	0.0475578	-0.45353	0.138651	-0.0781487	0.809238
ENSMUSG00000061371	82048123	82064745	zinc finger protein 873 [Source:MGI Symbol;Acc:MGI:3040689]	Zfp873	protein_coding	1	yellow	-0.139131	0.666292	0.247223	0.43853	0.121637	0.706487	-0.347826	0.267911	-0.497552	0.099773	0.3729	0.232539	-0.749951	0.00496897	-0.228493	0.475043	0.479049	0.115092	0.561569	0.0574307	-0.746852	0.0052546	0.677588	0.0154714	0.244285	0.444167	0.710249	0.00964478	-0.692041	0.0126414	0.507987	0.0917674	0.443488	0.148714	0.643467	0.0239712	-0.506054	0.0932166	-0.447078	0.145064
ENSMUSG00000015189	4600839	4643355	CAS1 domain containing 1 [Source:MGI Symbol;Acc:MGI:2384865]	Casd1	protein_coding	1	yellow	-0.130104	0.686939	-0.272224	0.392007	0.0560389	0.862667	-0.588744	0.0440091	-0.361259	0.248595	0.241467	0.449605	-0.617431	0.0324255	-0.271163	0.393928	0.721551	0.00807336	0.398953	0.198903	-0.346354	0.27008	0.632691	0.0272478	0.328285	0.297507	0.291603	0.357765	-0.228222	0.475581	0.545067	0.0668446	0.473144	0.120289	0.561851	0.0572781	-0.129123	0.689194	0.162059	0.614822
ENSMUSG00000027309	130706200	130906406	RIKEN cDNA 4930402H24 gene [Source:MGI Symbol;Acc:MGI:1923029]	4930402H24Rik	protein_coding	-1	yellow	0.254006	0.425653	-0.118517	0.713731	0.113246	0.726018	-0.383045	0.219063	-0.0567653	0.860903	0.128305	0.691078	-0.304184	0.336417	-0.293997	0.353649	0.328194	0.297649	0.446032	0.146122	-0.15985	0.619717	0.458324	0.134006	0.437391	0.155047	0.634087	0.0268061	-0.660399	0.0194142	0.125069	0.698542	0.237539	0.457236	0.240656	0.451176	-0.430232	0.162698	0.216911	0.498296
ENSMUSG00000026581	164061982	164084181	selectin, lymphocyte [Source:MGI Symbol;Acc:MGI:98279]	Sell	protein_coding	1	yellow	0.202456	0.528013	-0.117574	0.715926	-0.00702962	0.982702	-0.274349	0.388173	0.0482715	0.881575	0.163637	0.611335	-0.383233	0.218818	-0.295906	0.350385	0.457882	0.134429	0.451822	0.140331	-0.627967	0.0287816	0.456535	0.135727	0.383974	0.217853	0.558668	0.0590143	-0.415142	0.179599	0.311636	0.324105	0.576429	0.0497815	0.609815	0.0352578	-0.241832	0.448898	-0.328469	0.29722
ENSMUSG00000055538	25711642	25769039	zinc finger, CCHC domain containing 24 [Source:MGI Symbol;Acc:MGI:1919168]	Zcchc24	protein_coding	-1	yellow	-0.0250108	0.938501	-0.0569958	0.860343	0.343767	0.273913	-0.621816	0.0308709	-0.450947	0.141196	0.39802	0.200052	-0.812375	0.00132385	-0.271414	0.393473	0.593811	0.041778	0.67525	0.0159695	-0.694385	0.0122214	0.857379	0.000363948	0.421969	0.171823	0.569209	0.0534022	-0.659124	0.0197333	0.466153	0.126639	0.573845	0.051057	0.618124	0.0321762	-0.377549	0.226304	-0.222124	0.487768
ENSMUSG00000028248	21847583	21876475	PNN interacting serine/arginine-rich [Source:MGI Symbol;Acc:MGI:1913875]	Pnisr	protein_coding	1	yellow	0.213748	0.504734	-0.590203	0.0433585	0.111301	0.730568	-0.620618	0.0312904	-0.0289734	0.928778	0.0436162	0.892935	-0.59861	0.0397398	-0.62465	0.0298952	0.753237	0.00467916	0.579778	0.0481617	-0.555463	0.0607988	0.696277	0.01189	0.740637	0.00586444	0.197327	0.538734	-0.531636	0.0752532	0.208758	0.514966	0.783138	0.00259053	0.409891	0.185726	-0.0409055	0.899558	0.165432	0.607378
ENSMUSG00000051331	118587240	119196890	calcium channel, voltage-dependent, L type, alpha 1C subunit [Source:MGI Symbol;Acc:MGI:103013]	Cacna1c	protein_coding	-1	yellow	-0.00160404	0.996053	-0.163325	0.612025	-0.00756626	0.981381	-0.230469	0.471126	-0.583657	0.0463331	0.360876	0.249135	-0.7716	0.00328729	-0.505243	0.0938293	0.362204	0.247269	0.600782	0.0388411	-0.622849	0.0305128	0.624024	0.0301088	0.464027	0.128612	0.33951	0.28029	-0.526176	0.0788695	0.231291	0.4695	0.440805	0.15148	0.345903	0.270746	-0.130185	0.686752	0.0942719	0.77073
ENSMUSG00000064337	70	1024	mitochondrially encoded 12S rRNA [Source:MGI Symbol;Acc:MGI:102493]	mt-Rnr1	Mt_rRNA	1	yellow	-0.286938	0.365859	0.0397039	0.902496	0.293168	0.355072	-0.610818	0.0348749	-0.635777	0.0262784	0.458273	0.134055	-0.900853	6.37523e-05	-0.205836	0.520996	0.63873	0.025374	0.562606	0.056872	-0.533886	0.0737963	0.855623	0.000385716	0.246295	0.440307	0.434004	0.158638	-0.663696	0.0186065	0.639186	0.0252365	0.371294	0.234717	0.498895	0.0987176	-0.545907	0.0663408	-0.0371159	0.908828
ENSMUSG00000060733	71347763	71433327	inositol polyphosphate multikinase [Source:MGI Symbol;Acc:MGI:1916968]	Ipmk	protein_coding	1	yellow	0.141812	0.6602	-0.417054	0.177399	-0.0968311	0.764659	-0.414664	0.180151	-0.186758	0.561114	0.121375	0.707094	-0.699337	0.0113682	-0.662178	0.0189751	0.855277	0.000390119	0.595281	0.0411461	-0.636136	0.0261672	0.724178	0.00773729	0.712576	0.00930401	0.357358	0.254119	-0.51822	0.0843483	0.360934	0.249053	0.66584	0.0180947	0.581854	0.0471767	-0.1026	0.751018	0.158845	0.621948
ENSMUSG00000068699	29433256	29461883	filamin C, gamma [Source:MGI Symbol;Acc:MGI:95557]	Flnc	protein_coding	1	yellow	0.0729201	0.821814	-0.142308	0.659075	-0.045938	0.887267	-0.121725	0.706282	-0.489805	0.10601	0.356956	0.254691	-0.568705	0.0536618	-0.360062	0.250282	0.273717	0.389311	0.525581	0.0792705	-0.450877	0.141265	0.497065	0.100158	0.364107	0.244609	0.505635	0.0935322	-0.413119	0.181944	0.2025	0.52792	0.3285	0.297171	0.38936	0.210918	-0.162881	0.613005	0.165613	0.606977
ENSMUSG00000030680	127015033	127017352	PAXIP1 associated glutamate rich protein 1A [Source:MGI Symbol;Acc:MGI:1914528]	Pagr1a	protein_coding	-1	yellow	-0.42141	0.172452	-0.259967	0.414492	0.153685	0.633452	-0.428998	0.164042	-0.446531	0.145616	0.179176	0.577397	-0.42878	0.16428	0.093036	0.773666	0.405101	0.191428	0.0319486	0.921483	0.0151807	0.962653	0.463068	0.12951	-0.028947	0.928843	0.036806	0.909586	0.0352726	0.91334	0.426432	0.166856	-0.020942	0.948493	0.181189	0.573056	-0.228013	0.475997	0.324578	0.30332
ENSMUSG00000021390	49608046	49624501	osteoglycin [Source:MGI Symbol;Acc:MGI:109278]	Ogn	protein_coding	1	yellow	-0.0241857	0.940527	-0.254962	0.423852	0.254807	0.424145	-0.626247	0.0293554	-0.433844	0.158809	0.383214	0.218842	-0.823555	0.000993374	-0.39681	0.20155	0.749549	0.00500533	0.676297	0.0157449	-0.505792	0.0934137	0.872855	0.000210584	0.494804	0.101956	0.454195	0.138	-0.710312	0.00963541	0.50795	0.0917945	0.55012	0.0638561	0.515386	0.0863604	-0.43432	0.1583	0.209089	0.514283
ENSMUSG00000021756	112464070	112510086	interleukin 6 signal transducer [Source:MGI Symbol;Acc:MGI:96560]	Il6st	protein_coding	1	yellow	0.165861	0.606432	-0.152511	0.636079	0.266489	0.402449	-0.585947	0.0452765	-0.276453	0.384396	0.408	0.187965	-0.766919	0.00360734	-0.399007	0.198836	0.641419	0.0245706	0.775226	0.00305462	-0.787168	0.00237592	0.823737	0.000988599	0.537557	0.0714617	0.605137	0.0370825	-0.690483	0.0129263	0.452419	0.139741	0.771012	0.00332628	0.711751	0.00942376	-0.316217	0.316661	-0.231261	0.46956
ENSMUSG00000104399	108389082	108390205	predicted gene, 37963 [Source:MGI Symbol;Acc:MGI:5611191]	Gm37963	sense_intronic	1	yellow	0.0108373	0.973334	-0.0811143	0.802124	-0.100672	0.755569	-0.203006	0.526867	-0.483757	0.111056	0.261834	0.411025	-0.779602	0.00279075	-0.517993	0.0845085	0.571808	0.0520782	0.589729	0.0435691	-0.810731	0.00137879	0.67947	0.0150787	0.52614	0.0788935	0.498527	0.0990061	-0.47056	0.122611	0.332377	0.291163	0.514766	0.0868051	0.624453	0.0299624	-0.09559	0.767601	-0.183516	0.568053
ENSMUSG00000027425	144368983	144407676	lysine acetyltransferase 14 [Source:MGI Symbol;Acc:MGI:1917264]	Kat14	protein_coding	1	yellow	0.131786	0.683076	0.294519	0.352755	0.653244	0.0212547	-0.492059	0.10417	-0.0576342	0.858792	0.581737	0.0472321	-0.494099	0.102522	0.117028	0.717195	0.58629	0.0451198	0.667026	0.017816	-0.432424	0.160331	0.664057	0.0185195	0.0869678	0.788121	0.388926	0.211471	-0.606845	0.0364087	0.633055	0.0271324	0.499048	0.0985979	0.67239	0.0165949	-0.519154	0.0836921	-0.347702	0.268094
ENSMUSG00000033904	118712552	118737024	centriolar coiled coil protein 110 [Source:MGI Symbol;Acc:MGI:2141942]	Ccp110	protein_coding	1	yellow	0.10854	0.737042	-0.435391	0.157161	0.139245	0.666031	-0.497127	0.100109	-0.0416843	0.897655	0.133816	0.678424	-0.507645	0.0920224	-0.426241	0.167067	0.485537	0.109555	0.46167	0.130824	-0.516247	0.0857455	0.538487	0.0708784	0.475907	0.117838	0.123915	0.70121	-0.445006	0.147164	0.218212	0.49566	0.663468	0.0186616	0.298698	0.345639	-0.128075	0.691608	0.0102022	0.974896
ENSMUSG00000064339	1094	2675	mitochondrially encoded 16S rRNA [Source:MGI Symbol;Acc:MGI:102492]	mt-Rnr2	Mt_rRNA	1	yellow	0.0285663	0.929777	-0.145046	0.652877	0.0954406	0.767956	-0.526626	0.0785668	-0.34053	0.278754	0.21838	0.49532	-0.785749	0.00244989	-0.515944	0.0859621	0.759665	0.00414925	0.643894	0.0238476	-0.686947	0.0135908	0.794304	0.00202948	0.584029	0.0461603	0.511828	0.0889327	-0.711658	0.00943735	0.421798	0.172015	0.619078	0.0318353	0.589244	0.0437853	-0.308437	0.32936	-0.0807898	0.802902
ENSMUSG00000031157	7894519	7899269	polyglutamine binding protein 1 [Source:MGI Symbol;Acc:MGI:1859638]	Pqbp1	protein_coding	-1	yellow	0.0265009	0.934844	-0.145607	0.651609	0.113328	0.725827	-0.36065	0.249453	-0.576748	0.0496254	0.439691	0.152638	-0.80548	0.0015661	-0.445712	0.146446	0.38266	0.219566	0.649932	0.0221485	-0.596939	0.0404414	0.704268	0.0105632	0.463907	0.128725	0.346877	0.269307	-0.534511	0.0733956	0.297839	0.347096	0.432338	0.160423	0.374478	0.230411	-0.166432	0.605175	0.0999721	0.757224
ENSMUSG00000098198	95144371	95144906	predicted gene 9169 [Source:MGI Symbol;Acc:MGI:3648561]	Gm9169	processed_pseudogene	1	yellow	-0.690817	0.0128649	0.179941	0.575746	0.290197	0.360196	-0.450866	0.141276	-0.788264	0.00231997	0.359308	0.251348	-0.754037	0.00461057	0.173329	0.590079	0.344081	0.273447	0.153324	0.634258	-0.434972	0.157606	0.616332	0.0328236	-0.190395	0.55337	0.169144	0.599221	-0.200131	0.532862	0.601922	0.038375	0.0851961	0.792354	0.348764	0.266535	-0.408463	0.187415	-0.31984	0.310841
ENSMUSG00000059422	78820638	78821838	predicted gene 8116 [Source:MGI Symbol;Acc:MGI:3648797]	Gm8116	processed_pseudogene	-1	yellow	-0.310937	0.32525	0.0951429	0.768662	0.411099	0.184305	-0.716578	0.00873915	-0.626533	0.0292593	0.548811	0.0646213	-0.84533	0.00053446	0.0274134	0.932605	0.695879	0.011959	0.574133	0.0509138	-0.584959	0.04573	0.87382	0.000203056	0.100671	0.755573	0.628961	0.028454	-0.491011	0.105023	0.798965	0.00182501	0.507599	0.0920571	0.809009	0.0014382	-0.521479	0.0820735	-0.275425	0.386239
ENSMUSG00000049076	31092412	31201245	ArfGAP with coiled-coil, ankyrin repeat and PH domains 2 [Source:MGI Symbol;Acc:MGI:1925868]	Acap2	protein_coding	-1	yellow	-0.405762	0.190635	-0.00210285	0.994825	0.294055	0.35355	-0.580336	0.0478957	-0.670591	0.0169974	0.512375	0.0885342	-0.921583	2.04492e-05	-0.091971	0.776198	0.647539	0.0228108	0.476235	0.11755	-0.570013	0.0529902	0.853399	0.000414719	0.125358	0.697874	0.28004	0.378	-0.421817	0.171994	0.740855	0.00584216	0.349936	0.264822	0.556862	0.0600152	-0.45812	0.134201	-0.100171	0.756753
ENSMUSG00000026027	58973522	58995715	STE20-related kinase adaptor beta [Source:MGI Symbol;Acc:MGI:2144047]	Stradb	protein_coding	1	yellow	-0.455826	0.136413	0.368404	0.238665	0.248998	0.435143	-0.362099	0.247417	-0.756266	0.00442348	0.469749	0.123346	-0.747916	0.00515514	0.0948917	0.769258	0.298968	0.345183	0.323182	0.305525	-0.407971	0.187999	0.654103	0.0210273	-0.0747002	0.817528	0.495659	0.101274	-0.459727	0.132665	0.588132	0.0442845	-0.0274732	0.932458	0.394682	0.204199	-0.596192	0.0407575	-0.236696	0.458881
ENSMUSG00000062040	29893333	29906572	zinc finger protein 27 [Source:MGI Symbol;Acc:MGI:99174]	Zfp27	protein_coding	-1	yellow	-0.0912557	0.7779	0.100711	0.755478	0.174999	0.586447	-0.415301	0.179415	-0.475272	0.118399	0.42002	0.174021	-0.858066	0.000355698	-0.319375	0.311583	0.605068	0.0371098	0.646646	0.0230617	-0.791213	0.00217443	0.814696	0.00124915	0.367168	0.240367	0.589159	0.0438236	-0.719446	0.00835034	0.547106	0.0656274	0.494652	0.102078	0.640349	0.0248882	-0.490492	0.105447	-0.3112	0.324819
ENSMUSG00000040329	7569994	7613760	interleukin 7 [Source:MGI Symbol;Acc:MGI:96561]	Il7	protein_coding	-1	yellow	0.0148356	0.963501	-0.546415	0.0660381	0.222804	0.486402	-0.656114	0.0205019	-0.249421	0.434338	0.264511	0.406083	-0.62874	0.0285265	-0.358004	0.253199	0.660382	0.0194185	0.481965	0.112581	-0.281063	0.376187	0.714829	0.00898273	0.476283	0.117507	0.0738818	0.819498	-0.325307	0.30217	0.384137	0.217642	0.49347	0.103028	0.321653	0.30795	-0.131381	0.684006	0.433278	0.159415
ENSMUSG00000044763	56032609	56037819	tRNA methyltransferase 10C, mitochondrial RNase P subunit [Source:MGI Symbol;Acc:MGI:1196261]	Trmt10c	protein_coding	-1	yellow	-0.284758	0.369674	-0.0480648	0.882079	0.488632	0.106977	-0.826009	0.000930259	-0.323187	0.305516	0.321779	0.30775	-0.542377	0.0684738	0.18867	0.557039	0.734653	0.00650063	0.378117	0.225548	-0.27735	0.382792	0.746362	0.00530082	0.0332341	0.918333	0.634291	0.0267421	-0.4213	0.172575	0.721759	0.00804628	0.448105	0.144031	0.717665	0.00859014	-0.597148	0.0403528	-0.154572	0.631468
ENSMUSG00000035024	27030175	27095315	non-SMC condensin II complex, subunit D3 [Source:MGI Symbol;Acc:MGI:2142989]	Ncapd3	protein_coding	1	yellow	0.348344	0.267151	0.195891	0.541752	0.660113	0.0194854	-0.409842	0.185785	-0.0745023	0.818005	0.666931	0.0178383	-0.40209	0.195067	0.0250645	0.938369	0.388334	0.212229	0.770493	0.00336097	-0.132128	0.682291	0.608405	0.0358006	0.184164	0.566663	0.474626	0.11897	-0.806372	0.001533	0.431605	0.161214	0.330702	0.293751	0.399536	0.198186	-0.630031	0.0281041	0.169651	0.598111
ENSMUSG00000013662	32671638	32739786	ATPase family, AAA domain containing 1 [Source:MGI Symbol;Acc:MGI:1915229]	Atad1	protein_coding	-1	yellow	-0.349002	0.266186	-0.0807376	0.803027	0.600511	0.0389522	-0.914126	3.17953e-05	-0.57112	0.0524266	0.575401	0.0502863	-0.799036	0.00182201	0.12374	0.701615	0.65682	0.0203196	0.518535	0.0841266	-0.345455	0.271409	0.885583	0.000127066	0.0386564	0.905058	0.392618	0.206789	-0.45633	0.135925	0.795025	0.00199674	0.459063	0.133299	0.594236	0.0415944	-0.567213	0.0544353	-0.0145697	0.964155
ENSMUSG00000067873	57053583	57067183	HIV TAT specific factor 1 [Source:MGI Symbol;Acc:MGI:1919709]	Htatsf1	protein_coding	1	yellow	-0.300135	0.34321	-0.0669874	0.836131	0.447545	0.144594	-0.762608	0.00392241	-0.426537	0.16674	0.268937	0.397975	-0.713026	0.00923913	-0.0439972	0.892005	0.674016	0.0162371	0.429856	0.163107	-0.435123	0.157446	0.809342	0.00142659	0.196586	0.540292	0.42281	0.170879	-0.572192	0.0518845	0.566128	0.0550023	0.428091	0.165032	0.500592	0.0973941	-0.52507	0.0796159	-0.153502	0.63386
ENSMUSG00000035835	79860475	79874634	phospholipid phosphatase related 3 [Source:MGI Symbol;Acc:MGI:2388640]	Plppr3	protein_coding	-1	yellow	0.210707	0.510959	0.212564	0.507154	0.564924	0.0556365	-0.373936	0.23114	-0.104765	0.745915	0.529622	0.0765736	-0.5559	0.0605531	-0.105691	0.743736	0.521694	0.0819253	0.708519	0.00990404	-0.383671	0.218248	0.686207	0.013733	0.269659	0.396659	0.282987	0.372789	-0.771084	0.00332145	0.445918	0.146237	0.358448	0.252567	0.412565	0.18259	-0.521437	0.0821023	-0.0666998	0.836826
ENSMUSG00000052137	12089439	12096243	RNA binding motif protein 12 B2 [Source:MGI Symbol;Acc:MGI:1924854]	Rbm12b2	protein_coding	1	yellow	-0.0123208	0.969685	-0.418603	0.17563	0.205621	0.521442	-0.767181	0.0035888	-0.0123723	0.969559	-0.0556607	0.863587	-0.362523	0.246822	-0.203497	0.525848	0.758355	0.00425332	0.317671	0.314317	-0.348674	0.266668	0.542981	0.0681055	0.389626	0.210579	0.344604	0.272669	-0.214109	0.503997	0.354031	0.258884	0.717678	0.0085885	0.602981	0.0379457	-0.0268927	0.933883	-0.100322	0.756398
ENSMUSG00000036745	146852367	146984009	tubulin tyrosine ligase-like family, member 7 [Source:MGI Symbol;Acc:MGI:1918142]	Ttll7	protein_coding	1	yellow	-0.0194351	0.952196	-0.357373	0.254097	0.0399688	0.901848	-0.415086	0.179664	-0.336848	0.284321	0.1898	0.554634	-0.768794	0.00347644	-0.528579	0.0772637	0.738299	0.00610716	0.586552	0.0450004	-0.785558	0.00245999	0.732486	0.00674332	0.558111	0.0593214	0.307467	0.330961	-0.483913	0.110924	0.362932	0.24625	0.75213	0.00477533	0.599541	0.0393527	-0.0943991	0.770428	-0.100372	0.756278
ENSMUSG00000031996	31149557	31211815	amyloid beta (A4) precursor-like protein 2 [Source:MGI Symbol;Acc:MGI:88047]	Aplp2	protein_coding	-1	yellow	0.040292	0.901058	-0.244622	0.443519	0.120553	0.709001	-0.503961	0.0948032	-0.41453	0.180306	0.334775	0.287481	-0.815885	0.00121215	-0.501383	0.0967819	0.755946	0.00444991	0.681884	0.0145858	-0.568969	0.0535256	0.835394	0.000716907	0.575142	0.0504139	0.464729	0.127959	-0.679961	0.0149773	0.452193	0.139965	0.544077	0.0674409	0.54009	0.0698807	-0.335159	0.286894	0.193619	0.546544
ENSMUSG00000032624	83350931	83480361	echinoderm microtubule associated protein like 4 [Source:MGI Symbol;Acc:MGI:1926048]	Eml4	protein_coding	1	yellow	-0.0644047	0.842377	0.340944	0.278132	0.735152	0.0064457	-0.45956	0.132824	-0.213042	0.506176	0.663475	0.0186599	-0.43728	0.155164	0.407324	0.188769	0.516222	0.0857638	0.563315	0.0564921	-0.361005	0.248954	0.618567	0.0320176	-0.184731	0.565449	0.495644	0.101286	-0.418095	0.176209	0.727778	0.007294	0.446199	0.145953	0.787606	0.00235342	-0.568093	0.0539782	-0.424595	0.168889
ENSMUSG00000034462	104459450	104505819	polycystin 2, transient receptor potential cation channel [Source:MGI Symbol;Acc:MGI:1099818]	Pkd2	protein_coding	1	yellow	0.198742	0.535768	-0.1515	0.638344	0.203893	0.525024	-0.481218	0.113221	-0.330639	0.293848	0.315957	0.317081	-0.760596	0.00407649	-0.523605	0.0806125	0.530012	0.0763164	0.764266	0.00379886	-0.751992	0.00478741	0.774387	0.00310729	0.629007	0.028439	0.551805	0.0628809	-0.778586	0.0028504	0.254344	0.425016	0.671628	0.0167645	0.517164	0.0850945	-0.260042	0.414353	-0.131518	0.683691
ENSMUSG00000022676	14705852	14709385	snail family zinc finger 2 [Source:MGI Symbol;Acc:MGI:1096393]	Snai2	protein_coding	1	yellow	0.146423	0.649766	-0.027027	0.933553	0.130657	0.685669	-0.357193	0.254353	-0.435919	0.156602	0.407498	0.188562	-0.772523	0.00322684	-0.473196	0.120243	0.393682	0.205451	0.740491	0.00587935	-0.808525	0.00145526	0.694651	0.0121744	0.514128	0.0872645	0.544686	0.0670737	-0.674319	0.0161711	0.28192	0.374672	0.627087	0.0290742	0.539656	0.0701499	-0.205723	0.52123	-0.243928	0.444854
ENSMUSG00000054702	79606876	79671972	adaptor-related protein complex AP-1, sigma 3 [Source:MGI Symbol;Acc:MGI:1891304]	Ap1s3	protein_coding	-1	yellow	-0.497951	0.099459	-0.384734	0.216867	0.186867	0.56088	-0.655814	0.0205794	-0.35384	0.25916	0.1075	0.739482	-0.473739	0.119759	0.0523789	0.871569	0.605833	0.0368069	-0.00857496	0.9789	-0.00636546	0.984336	0.504183	0.0946336	-0.00422074	0.989613	-0.198815	0.535614	0.128674	0.690229	0.549027	0.0644944	0.156472	0.627229	0.219141	0.493781	-0.119173	0.712206	0.291157	0.358535
ENSMUSG00000040322	109123149	109168457	solute carrier family 25 (mitochondrial carrier, phosphate carrier), member 24 [Source:MGI Symbol;Acc:MGI:1917160]	Slc25a24	protein_coding	1	yellow	-0.607232	0.0362573	0.0502601	0.876729	0.459396	0.13298	-0.660318	0.0194344	-0.706024	0.0102871	0.535327	0.0728737	-0.768183	0.00351868	0.276411	0.384471	0.563671	0.0563017	0.280739	0.376761	-0.29376	0.354056	0.77482	0.00308003	-0.190212	0.55376	0.290464	0.359733	-0.242403	0.447795	0.832268	0.00078324	0.167574	0.602665	0.524221	0.0801925	-0.588919	0.043931	-0.0690307	0.831194
ENSMUSG00000020121	121780991	122047315	SLIT-ROBO Rho GTPase activating protein 1 [Source:MGI Symbol;Acc:MGI:2152936]	Srgap1	protein_coding	-1	yellow	-0.261964	0.410786	-0.372006	0.23375	0.0900935	0.780668	-0.468893	0.124125	-0.591572	0.0427537	0.302203	0.339731	-0.822272	0.00102768	-0.377093	0.226911	0.693218	0.0124292	0.457608	0.134693	-0.46506	0.127651	0.741067	0.00582058	0.365069	0.243271	0.100956	0.7549	-0.338025	0.282534	0.472229	0.121108	0.455865	0.136375	0.400776	0.196668	-0.151823	0.637621	0.282778	0.373157
ENSMUSG00000058291	138603652	138619761	zinc finger protein 68 [Source:MGI Symbol;Acc:MGI:1344427]	Zfp68	protein_coding	-1	yellow	-0.0968609	0.764588	-0.286491	0.36664	0.244807	0.443163	-0.658555	0.0198769	-0.436249	0.156252	0.439548	0.152788	-0.81554	0.00122281	-0.28367	0.371586	0.858065	0.000355712	0.651691	0.0216704	-0.586018	0.0452438	0.860777	0.000324543	0.382518	0.219751	0.455401	0.136825	-0.479779	0.11446	0.674625	0.0161047	0.709437	0.00976592	0.761731	0.00398904	-0.320627	0.309583	0.0605305	0.851764
ENSMUSG00000018830	14194535	14291372	myosin, heavy polypeptide 11, smooth muscle [Source:MGI Symbol;Acc:MGI:102643]	Myh11	protein_coding	-1	yellow	0.108728	0.736599	-0.106569	0.741672	-0.0289023	0.928952	-0.279058	0.379747	-0.425207	0.16821	0.31559	0.317674	-0.777258	0.00292982	-0.591705	0.0426953	0.515173	0.086513	0.651914	0.0216102	-0.628322	0.0286644	0.694885	0.0121332	0.587906	0.0443864	0.417747	0.176606	-0.680283	0.0149113	0.289808	0.360868	0.421044	0.172864	0.39113	0.208669	-0.249082	0.434983	0.102361	0.751581
ENSMUSG00000014905	44205559	44210326	DnaJ heat shock protein family (Hsp40) member B9 [Source:MGI Symbol;Acc:MGI:1351618]	Dnajb9	protein_coding	-1	yellow	-0.215275	0.501621	0.230602	0.470862	0.276929	0.383543	-0.418564	0.175674	-0.748694	0.00508339	0.554959	0.0610828	-0.800849	0.00174699	-0.0585145	0.856655	0.394856	0.203982	0.590294	0.043318	-0.592826	0.0422051	0.739879	0.0059423	0.130623	0.685746	0.707019	0.010133	-0.543762	0.0676316	0.548309	0.0649164	0.330738	0.293695	0.643131	0.0240688	-0.448349	0.143786	-0.253718	0.426195
ENSMUSG00000112368	55275381	55278714	predicted gene, 49376 [Source:MGI Symbol;Acc:MGI:6121596]	Gm49376	unprocessed_pseudogene	1	yellow	-0.499316	0.0983881	-0.00217853	0.994639	0.424517	0.168976	-0.702199	0.0108957	-0.67668	0.0156634	0.416812	0.177677	-0.722107	0.00800125	0.128702	0.690164	0.483883	0.110949	0.340444	0.278884	-0.422619	0.171093	0.67496	0.0160321	-0.0730595	0.821478	0.2914	0.358116	-0.260866	0.41282	0.638262	0.025516	0.433099	0.159607	0.5283	0.0774485	-0.337346	0.283564	-0.239759	0.452916
ENSMUSG00000032733	56917193	56928371	sorting nexin 33 [Source:MGI Symbol;Acc:MGI:2443239]	Snx33	protein_coding	-1	yellow	-0.00129636	0.99681	-0.110706	0.731963	0.135684	0.674151	-0.516378	0.0856523	-0.349818	0.264995	0.41487	0.179913	-0.781123	0.00270325	-0.365967	0.242025	0.680769	0.0148118	0.606497	0.0365453	-0.560418	0.0580554	0.782399	0.00263145	0.42744	0.165746	0.384361	0.21735	-0.55139	0.0631199	0.575386	0.0502936	0.462976	0.129596	0.555732	0.0606475	-0.362544	0.246792	0.0429417	0.894583
ENSMUSG00000024899	32595790	32667187	3'-phosphoadenosine 5'-phosphosulfate synthase 2 [Source:MGI Symbol;Acc:MGI:1330223]	Papss2	protein_coding	1	yellow	-0.015459	0.961969	-0.354223	0.258608	0.0626245	0.846688	-0.458204	0.134121	-0.463605	0.129007	0.304962	0.335119	-0.8435	0.000564991	-0.524033	0.0803207	0.740166	0.00591274	0.651257	0.0217877	-0.766487	0.00363797	0.786403	0.00241557	0.562531	0.056912	0.307105	0.331562	-0.423356	0.170269	0.417681	0.176681	0.740714	0.00585653	0.644782	0.023592	-0.0268588	0.933966	-0.00981788	0.975842
ENSMUSG00000021238	84430717	84451004	aldehyde dehydrogenase family 6, subfamily A1 [Source:MGI Symbol;Acc:MGI:1915077]	Aldh6a1	protein_coding	-1	yellow	0.192712	0.548461	-0.51419	0.0872195	0.0239688	0.94106	-0.500844	0.0971992	-0.154776	0.631013	0.116972	0.717327	-0.66729	0.0177545	-0.647791	0.0227404	0.794232	0.00203277	0.606334	0.0366092	-0.536219	0.0723068	0.737143	0.00622991	0.745228	0.00540905	0.262519	0.409757	-0.52917	0.076872	0.269204	0.397489	0.649054	0.0223897	0.452772	0.139394	-0.0741696	0.818805	0.282394	0.373834
ENSMUSG00000032469	99575799	99584501	debranching RNA lariats 1 [Source:MGI Symbol;Acc:MGI:1931520]	Dbr1	protein_coding	1	yellow	-0.211175	0.509999	-0.231503	0.469083	0.335219	0.286803	-0.812709	0.0013129	-0.217958	0.496174	0.0861128	0.790163	-0.477587	0.116365	-0.0531484	0.869696	0.580505	0.0478153	0.240353	0.451763	-0.252998	0.427556	0.582854	0.0467074	0.208702	0.515079	0.144609	0.653864	-0.191309	0.551432	0.424644	0.168835	0.429019	0.164018	0.384753	0.216842	-0.13452	0.676814	-0.0864435	0.789373
ENSMUSG00000024943	23206451	23273897	structural maintenance of chromosomes 5 [Source:MGI Symbol;Acc:MGI:2385088]	Smc5	protein_coding	-1	yellow	-0.235209	0.461792	0.00118357	0.997087	0.567972	0.0540409	-0.758187	0.00426687	-0.609737	0.0352877	0.679204	0.0151337	-0.830036	0.000833447	0.0945663	0.770031	0.568664	0.0536831	0.646018	0.0232393	-0.548728	0.06467	0.887658	0.000116375	0.0697799	0.829386	0.566399	0.0548601	-0.491732	0.104435	0.756821	0.00437778	0.552423	0.0625258	0.738148	0.00612311	-0.532566	0.0746484	-0.196072	0.541371
ENSMUSG00000035649	44755877	44932215	zinc finger, CCHC domain containing 7 [Source:MGI Symbol;Acc:MGI:2442912]	Zcchc7	protein_coding	1	yellow	-0.111359	0.730434	-0.373557	0.231652	0.358567	0.252399	-0.790113	0.00222787	-0.33177	0.292099	0.260211	0.414038	-0.787187	0.00237495	-0.330278	0.294407	0.804852	0.00158978	0.575558	0.050209	-0.564083	0.0560825	0.85871	0.000348097	0.459186	0.133181	0.233618	0.464915	-0.535038	0.0730582	0.500736	0.0972825	0.705587	0.0103554	0.526517	0.0786403	-0.262784	0.409269	0.0151899	0.96263
ENSMUSG00000002996	31926254	31950535	high mobility group box transcription factor 1 [Source:MGI Symbol;Acc:MGI:894659]	Hbp1	protein_coding	-1	yellow	-0.113701	0.724956	-0.0312568	0.923179	0.39006	0.210027	-0.68454	0.0140574	-0.192028	0.549909	0.250016	0.433206	-0.601939	0.0383682	-0.0998892	0.75742	0.627395	0.0289716	0.456019	0.136226	-0.435994	0.156522	0.737068	0.00623794	0.256066	0.42178	0.478609	0.115474	-0.664736	0.0183569	0.522688	0.0812406	0.428236	0.164874	0.476907	0.11696	-0.59952	0.0393613	-0.182985	0.569194
ENSMUSG00000104548	152391162	152394240	predicted gene 43857 [Source:MGI Symbol;Acc:MGI:5663994]	Gm43857	TEC	-1	yellow	-0.515324	0.086405	-0.294565	0.352676	0.470018	0.123102	-0.686931	0.0135938	-0.591212	0.0429121	0.430338	0.162584	-0.479597	0.114617	0.31432	0.319731	0.328839	0.296643	0.130657	0.68567	0.105176	0.744949	0.518912	0.0838619	-0.232539	0.467039	0.0125716	0.969069	0.0205283	0.94951	0.562972	0.0566753	0.142974	0.657565	0.203884	0.525044	-0.32259	0.306463	0.365319	0.242923
ENSMUSG00000053965	122728947	122859374	phosphodiesterase 5A, cGMP-specific [Source:MGI Symbol;Acc:MGI:2651499]	Pde5a	protein_coding	1	yellow	0.0901584	0.780513	-0.319678	0.311099	0.205277	0.522155	-0.619122	0.0318194	-0.342498	0.275805	0.391553	0.208133	-0.820403	0.00107926	-0.449585	0.14255	0.861514	0.000316457	0.751933	0.00479255	-0.663823	0.018576	0.891658	9.77601e-05	0.579171	0.0484529	0.507318	0.0922674	-0.600815	0.0388273	0.550011	0.0639195	0.750062	0.00495894	0.74162	0.00576464	-0.272691	0.391162	0.0764636	0.813287
ENSMUSG00000030246	142490249	142507957	lactate dehydrogenase B [Source:MGI Symbol;Acc:MGI:96763]	Ldhb	protein_coding	-1	yellow	-0.104047	0.747607	-0.0743085	0.818471	0.351664	0.262307	-0.68241	0.0144801	-0.324529	0.303396	0.231865	0.468367	-0.560849	0.057821	-0.112094	0.728713	0.62321	0.0303882	0.442412	0.14982	-0.187523	0.559481	0.720467	0.00821515	0.28792	0.364148	0.556268	0.060347	-0.648175	0.0226333	0.45426	0.137937	0.270106	0.395846	0.398521	0.199435	-0.567439	0.0543177	0.160867	0.617461
ENSMUSG00000050697	5143861	5181899	protein kinase, AMP-activated, alpha 1 catalytic subunit [Source:MGI Symbol;Acc:MGI:2145955]	Prkaa1	protein_coding	1	yellow	-0.553631	0.0618354	0.105207	0.744875	0.502785	0.0957019	-0.768196	0.00351776	-0.556368	0.0602909	0.470458	0.122704	-0.610562	0.0349722	0.360487	0.249682	0.616829	0.0326433	0.250511	0.432265	-0.103297	0.749374	0.711324	0.00948621	-0.236193	0.459865	0.469462	0.123607	-0.348362	0.267124	0.866778	0.000263136	0.165441	0.607357	0.551232	0.0632113	-0.748911	0.00506351	-0.0179319	0.95589
ENSMUSG00000039701	122931493	122984510	ubiquitin specific peptidase 53 [Source:MGI Symbol;Acc:MGI:2139607]	Usp53	protein_coding	-1	yellow	-0.3389	0.281211	-0.197179	0.539047	0.301753	0.340488	-0.645136	0.0234906	-0.54101	0.0693126	0.509824	0.0904041	-0.85671	0.000372121	-0.101024	0.754739	0.821012	0.00106224	0.501116	0.0969886	-0.450073	0.142064	0.871964	0.000217726	0.162924	0.612911	0.286676	0.366317	-0.407094	0.189042	0.814024	0.00127042	0.453651	0.138532	0.627855	0.0288188	-0.49384	0.10273	0.131589	0.683529
ENSMUSG00000057234	109092297	109280748	methyltransferase like 15 [Source:MGI Symbol;Acc:MGI:1924144]	Mettl15	protein_coding	-1	yellow	0.275745	0.385664	0.00728739	0.982067	0.534296	0.0735335	-0.418019	0.176296	0.00909745	0.977614	0.546536	0.0659658	-0.535949	0.0724779	-0.117515	0.716063	0.68356	0.0142507	0.743722	0.00555538	-0.464097	0.128547	0.713497	0.00917168	0.314068	0.320141	0.270014	0.396014	-0.598116	0.0399462	0.539694	0.070126	0.579752	0.0481742	0.624713	0.0298738	-0.388278	0.212301	-0.0665282	0.837241
ENSMUSG00000078173	89400988	89402793	lens epithelial protein [Source:MGI Symbol;Acc:MGI:1930020]	Lenep	protein_coding	-1	yellow	-0.287024	0.365709	-0.381814	0.220672	0.0917424	0.776742	-0.400946	0.196461	-0.61114	0.0347529	0.34609	0.270468	-0.728732	0.00717976	-0.305997	0.333399	0.435799	0.156728	0.358482	0.25252	-0.307613	0.330721	0.585676	0.0454007	0.235504	0.461215	-0.103192	0.749621	-0.213694	0.504844	0.375036	0.229662	0.324665	0.303182	0.163753	0.611079	-0.0857339	0.791068	0.396458	0.201986
ENSMUSG00000066553	24638669	24639010	predicted pseudogene 6969 [Source:MGI Symbol;Acc:MGI:3645320]	Gm6969	processed_pseudogene	-1	yellow	-0.340207	0.27924	-0.172783	0.591269	0.152246	0.636671	-0.568522	0.0537562	-0.325375	0.302063	0.280861	0.376546	-0.497569	0.0997602	0.0388233	0.90465	0.7226	0.00793789	0.189085	0.556154	0.00373583	0.990807	0.592868	0.0421869	0.0286821	0.929492	0.259917	0.414584	-0.212036	0.508235	0.7182	0.00851755	0.117039	0.71717	0.424866	0.168588	-0.502668	0.0957922	0.37057	0.235702
ENSMUSG00000026499	180726043	180754204	acyl-Coenzyme A binding domain containing 3 [Source:MGI Symbol;Acc:MGI:2181074]	Acbd3	protein_coding	1	yellow	0.0313937	0.922844	-0.0879271	0.785832	0.222725	0.48656	-0.545539	0.0665611	-0.493232	0.10322	0.461817	0.130685	-0.851777	0.000436933	-0.357808	0.253477	0.678264	0.0153295	0.753202	0.00468215	-0.783955	0.00254588	0.849053	0.00047629	0.4693	0.123754	0.600653	0.0388938	-0.568694	0.0536673	0.527987	0.0776573	0.702521	0.0108434	0.784656	0.00250804	-0.235302	0.461609	-0.205814	0.521042
ENSMUSG00000033186	99034544	99046134	mitotic spindle organizing protein 1 [Source:MGI Symbol;Acc:MGI:1924039]	Mzt1	protein_coding	-1	yellow	-0.275688	0.385768	-0.204922	0.52289	0.386555	0.214513	-0.768699	0.00348297	-0.424218	0.169309	0.211072	0.510208	-0.575671	0.0501533	-0.0414132	0.898317	0.658587	0.0198687	0.351018	0.263245	-0.136625	0.672003	0.696714	0.0118143	0.18535	0.564123	0.365288	0.242966	-0.456687	0.13558	0.494845	0.101924	0.341615	0.277126	0.384157	0.217615	-0.43214	0.160636	0.206973	0.518645
ENSMUSG00000027706	30792875	30821263	SEC62 homolog (S. cerevisiae) [Source:MGI Symbol;Acc:MGI:1916526]	Sec62	protein_coding	1	yellow	-0.531746	0.0751814	0.153746	0.633315	0.534694	0.0732783	-0.748391	0.00511126	-0.641465	0.0245571	0.573755	0.0511017	-0.826354	0.000921639	0.228345	0.475335	0.642379	0.0242882	0.416737	0.177763	-0.421185	0.172705	0.854927	0.000394616	-0.128837	0.689853	0.448377	0.143758	-0.488958	0.106707	0.893881	8.84733e-05	0.312443	0.322786	0.625611	0.0295697	-0.744134	0.00551509	-0.227618	0.476782
ENSMUSG00000062980	21985916	22256404	cadherin-like and PC-esterase domain containing 1 [Source:MGI Symbol;Acc:MGI:2444814]	Cped1	protein_coding	1	yellow	0.103015	0.750039	-0.180975	0.573516	0.23867	0.455033	-0.567673	0.0541959	-0.274778	0.3874	0.310067	0.326677	-0.789404	0.00226286	-0.462448	0.130092	0.713275	0.00920339	0.714557	0.00902106	-0.710511	0.00960592	0.847148	0.000505399	0.582395	0.0469227	0.491475	0.104645	-0.758068	0.00427645	0.420122	0.173906	0.656597	0.0203769	0.575903	0.0500391	-0.369076	0.237743	-0.0945863	0.769983
ENSMUSG00000041696	65398506	65414853	RAS-like, family 12 [Source:MGI Symbol;Acc:MGI:1918034]	Rasl12	protein_coding	1	yellow	0.353634	0.259457	-0.523397	0.0807548	-0.0142223	0.965009	-0.421978	0.171813	0.0742406	0.818635	0.0733403	0.820802	-0.393814	0.205286	-0.543957	0.0675135	0.665096	0.0182712	0.513941	0.087399	-0.278125	0.381408	0.561375	0.0575354	0.686078	0.013758	0.349841	0.264961	-0.456283	0.13597	0.186624	0.561401	0.507498	0.0921321	0.376885	0.227188	-0.120754	0.708533	0.43272	0.160013
ENSMUSG00000066037	136310942	136359447	heterogeneous nuclear ribonucleoprotein R [Source:MGI Symbol;Acc:MGI:1891692]	Hnrnpr	protein_coding	1	yellow	-0.287775	0.3644	-0.445347	0.146817	0.44978	0.142355	-0.715927	0.00882923	-0.376245	0.228042	0.364847	0.243579	-0.530586	0.0759397	0.108487	0.737165	0.506838	0.0926267	0.295716	0.35071	-0.20852	0.515456	0.626572	0.0292465	0.0372425	0.908518	0.0547005	0.865921	-0.0370722	0.908935	0.520671	0.0826335	0.464317	0.128343	0.410979	0.184447	-0.177242	0.58158	0.160499	0.618278
ENSMUSG00000070476	178414524	178424428	family with sequence similarity 217, member B [Source:MGI Symbol;Acc:MGI:1918782]	Fam217b	protein_coding	1	yellow	-0.417688	0.176674	0.189396	0.555493	0.288619	0.362931	-0.495594	0.101326	-0.729416	0.00709866	0.513281	0.0878765	-0.694608	0.0121819	0.124481	0.699902	0.471646	0.121632	0.377922	0.225808	-0.254815	0.42413	0.669204	0.0173124	-0.0765354	0.813114	0.561932	0.0572346	-0.410417	0.185107	0.691077	0.0128172	0.133553	0.679027	0.529072	0.0769369	-0.580647	0.0477478	0.00888545	0.978136
ENSMUSG00000110386	85125872	85132289	predicted gene, 42031 [Source:MGI Symbol;Acc:MGI:5624916]	Gm42031	lincRNA	-1	yellow	-0.253109	0.427345	-0.114351	0.723439	0.271803	0.392768	-0.466619	0.126209	-0.431569	0.161252	0.172672	0.59151	-0.517827	0.0846253	-0.0560596	0.862617	0.448672	0.143462	0.278029	0.381579	-0.156371	0.627453	0.599997	0.0391642	0.16747	0.602895	0.36769	0.239647	-0.468369	0.124603	0.326123	0.300889	0.114501	0.723089	0.227099	0.477813	-0.464747	0.127942	0.184474	0.565998
ENSMUSG00000020422	8431652	8664681	tensin 3 [Source:MGI Symbol;Acc:MGI:2443012]	Tns3	protein_coding	-1	yellow	-0.10582	0.743433	0.57774	0.0491432	0.747685	0.00517659	-0.401404	0.195902	-0.243325	0.446015	0.712813	0.00926984	-0.364464	0.244112	0.516015	0.0859112	0.31647	0.316252	0.459126	0.133238	-0.0337969	0.916954	0.552916	0.0622433	-0.315359	0.318047	0.532564	0.0746497	-0.588037	0.0443273	0.718258	0.0085098	-0.00745044	0.981666	0.479695	0.114532	-0.89321	9.12003e-05	-0.182628	0.56996
ENSMUSG00000047635	124328089	124341844	RIKEN cDNA 2810006K23 gene [Source:MGI Symbol;Acc:MGI:1919900]	2810006K23Rik	protein_coding	1	yellow	-0.289214	0.361898	0.174265	0.588041	0.532838	0.0744724	-0.713615	0.00915489	-0.561508	0.0574637	0.595061	0.04124	-0.756826	0.00437733	0.173256	0.590239	0.624867	0.0298216	0.553662	0.0618177	-0.420665	0.173292	0.869738	0.000236401	0.00922697	0.977296	0.726163	0.00749049	-0.600505	0.038955	0.804957	0.00158579	0.344976	0.272117	0.728304	0.00723089	-0.753745	0.00463548	-0.191932	0.550112
ENSMUSG00000036825	146404642	146440144	synovial sarcoma, X 2 interacting protein [Source:MGI Symbol;Acc:MGI:2139150]	Ssx2ip	protein_coding	1	yellow	-0.0577328	0.858553	-0.249893	0.433439	-0.0332618	0.918266	-0.315371	0.318028	-0.513755	0.0875337	0.242466	0.447673	-0.738603	0.00607521	-0.449434	0.142701	0.653516	0.0211826	0.54127	0.0691526	-0.6563	0.0204538	0.674737	0.0160804	0.47918	0.114978	0.394585	0.20432	-0.332772	0.290555	0.358085	0.253083	0.565433	0.0553676	0.622467	0.0306449	-0.00655955	0.983858	0.00458098	0.988727
ENSMUSG00000023150	151344477	151364422	influenza virus NS1A binding protein [Source:MGI Symbol;Acc:MGI:2152389]	Ivns1abp	protein_coding	1	yellow	0.172314	0.592292	-0.422691	0.171013	0.096613	0.765176	-0.572404	0.0517782	-0.177599	0.580807	0.219021	0.494023	-0.69197	0.0126543	-0.559669	0.0584644	0.878987	0.000166244	0.677872	0.0154115	-0.547034	0.0656701	0.788674	0.00229933	0.670498	0.0170183	0.436759	0.155713	-0.618953	0.03188	0.421996	0.171793	0.725778	0.0075379	0.612098	0.0343907	-0.2274	0.477215	0.221438	0.489147
ENSMUSG00000040520	26324506	26346891	mannosidase, endo-alpha [Source:MGI Symbol;Acc:MGI:2444484]	Manea	protein_coding	-1	yellow	-0.287404	0.365047	-0.0237048	0.941708	0.433733	0.158927	-0.710501	0.00960739	-0.601667	0.0384791	0.406656	0.189565	-0.768355	0.00350677	-0.052869	0.870376	0.499206	0.0984744	0.457415	0.134879	-0.371195	0.234851	0.782476	0.00262717	0.173262	0.590225	0.301898	0.340244	-0.457194	0.135091	0.522836	0.0811387	0.298817	0.345439	0.388764	0.211679	-0.380905	0.221865	-0.0181875	0.955261
ENSMUSG00000003929	33329342	33358878	zinc finger protein 81 [Source:MGI Symbol;Acc:MGI:1890752]	Zfp81	protein_coding	-1	yellow	-0.046624	0.885593	-0.253279	0.427024	0.353428	0.259754	-0.756088	0.00443815	-0.335513	0.286354	0.347225	0.268796	-0.780775	0.00272308	-0.322047	0.307325	0.651294	0.0217776	0.603364	0.0377914	-0.589149	0.0438278	0.804171	0.00161574	0.428725	0.164339	0.210125	0.512153	-0.514532	0.0869733	0.483367	0.111386	0.66475	0.0183535	0.486712	0.108571	-0.220916	0.490199	-0.0696671	0.829658
ENSMUSG00000036916	48541625	48594504	zinc finger protein 280C [Source:MGI Symbol;Acc:MGI:2387585]	Zfp280c	protein_coding	-1	yellow	-0.130653	0.685677	-0.615884	0.0329872	0.361036	0.248909	-0.84721	0.00050443	-0.0949591	0.769098	0.0850757	0.792641	-0.357943	0.253285	-0.103199	0.749606	0.551065	0.0633078	0.195201	0.543206	0.0805778	0.80341	0.511919	0.0888661	0.244033	0.444652	-0.156993	0.626068	-0.116258	0.718991	0.324928	0.302768	0.395768	0.202844	0.0964398	0.765586	-0.0954679	0.767891	0.490853	0.105151
ENSMUSG00000032328	79768943	79793507	transmembrane protein 30A [Source:MGI Symbol;Acc:MGI:106402]	Tmem30a	protein_coding	-1	yellow	-0.205809	0.521054	-0.25186	0.429707	0.410179	0.185387	-0.724887	0.0076484	-0.398581	0.199361	0.43347	0.159209	-0.561273	0.0575906	0.119295	0.711922	0.648786	0.0224639	0.411671	0.183635	-0.269873	0.39627	0.704226	0.01057	0.0761992	0.813923	0.412561	0.182595	-0.139489	0.665477	0.663369	0.0186855	0.483236	0.111498	0.69164	0.0127143	-0.283275	0.372281	0.0558651	0.86309
ENSMUSG00000024293	10566507	10610352	establishment of sister chromatid cohesion N-acetyltransferase 1 [Source:MGI Symbol;Acc:MGI:1925055]	Esco1	protein_coding	-1	yellow	-0.403228	0.193687	-0.165111	0.608084	0.411382	0.183974	-0.713075	0.0092321	-0.582304	0.0469652	0.52304	0.0809993	-0.623839	0.0301722	0.181866	0.571599	0.575186	0.050392	0.339231	0.28071	-0.0990641	0.759371	0.675422	0.0159324	-0.0893626	0.782409	0.287998	0.364011	-0.191434	0.551165	0.747482	0.00519549	0.298368	0.346199	0.502014	0.0962947	-0.443477	0.148725	0.250526	0.432236
ENSMUSG00000025104	81881251	81934473	HDGF like 3 [Source:MGI Symbol;Acc:MGI:1352760]	Hdgfl3	protein_coding	-1	yellow	-0.0365598	0.910189	-0.39436	0.204602	0.242089	0.448402	-0.578978	0.0485452	-0.205492	0.52171	0.196687	0.54008	-0.650142	0.0220908	-0.328719	0.29683	0.595659	0.0409846	0.485195	0.109842	-0.684131	0.0141378	0.668607	0.0174496	0.420224	0.173791	0.111124	0.730985	-0.315301	0.318142	0.344067	0.273467	0.747133	0.00522819	0.495717	0.101228	-0.0328545	0.919263	-0.204758	0.523229
ENSMUSG00000056888	111985448	112002631	GLI pathogenesis-related 1 (glioma) [Source:MGI Symbol;Acc:MGI:1920940]	Glipr1	protein_coding	-1	yellow	-0.238894	0.454596	0.199868	0.533411	0.550986	0.0633538	-0.666045	0.0180463	-0.49364	0.102891	0.488557	0.107039	-0.670388	0.0170433	0.12827	0.691158	0.279749	0.378517	0.459389	0.132987	-0.452273	0.139885	0.704381	0.0105454	0.0166056	0.95915	0.449629	0.142506	-0.533721	0.0739028	0.517824	0.0846271	0.287691	0.364546	0.412548	0.18261	-0.544146	0.0673991	-0.3603	0.249946
ENSMUSG00000032727	111680979	111718596	MIER family member 3 [Source:MGI Symbol;Acc:MGI:2442317]	Mier3	protein_coding	1	yellow	0.0786044	0.808144	-0.26747	0.400652	0.126014	0.696359	-0.536703	0.0720006	-0.309191	0.328117	0.238107	0.456129	-0.809997	0.00140388	-0.541465	0.0690322	0.828535	0.000868571	0.694535	0.0121947	-0.763956	0.00382173	0.842207	0.000587373	0.64288	0.0241418	0.451908	0.140245	-0.629619	0.0282386	0.423476	0.170136	0.73557	0.00639995	0.67071	0.0169705	-0.19421	0.545296	-0.0816451	0.800852
ENSMUSG00000034761	69803750	69893200	mitogen-activated protein kinase kinase kinase kinase 5 [Source:MGI Symbol;Acc:MGI:1925503]	Map4k5	protein_coding	-1	yellow	0.221086	0.489856	-0.314892	0.318803	0.104555	0.74641	-0.444422	0.147759	-0.318273	0.31335	0.251708	0.429995	-0.722731	0.00792111	-0.564873	0.0556636	0.670437	0.0170322	0.742528	0.00567351	-0.739461	0.00598563	0.761807	0.00398324	0.689431	0.0131215	0.537057	0.0717764	-0.584876	0.0457686	0.257505	0.419084	0.75475	0.00455002	0.649877	0.0221635	-0.06326	0.845149	-0.0282205	0.930625
ENSMUSG00000022686	19760208	19772753	UDP-GlcNAc:betaGal beta-1,3-N-acetylglucosaminyltransferase 5 [Source:MGI Symbol;Acc:MGI:2137302]	B3gnt5	protein_coding	1	yellow	-0.359867	0.250558	-0.136775	0.671661	0.194223	0.545268	-0.505457	0.0936672	-0.603818	0.0376089	0.454202	0.137993	-0.720866	0.00816268	-0.114326	0.723498	0.437675	0.154749	0.346492	0.269875	-0.276121	0.384991	0.598077	0.0399628	0.0590905	0.855257	0.0319886	0.921385	-0.26342	0.408093	0.572947	0.0515057	0.270605	0.394939	0.27066	0.39484	-0.291411	0.358097	0.210943	0.510474
ENSMUSG00000031665	89027235	89044162	spalt like transcription factor 1 [Source:MGI Symbol;Acc:MGI:1889585]	Sall1	protein_coding	-1	yellow	0.0229956	0.943449	-0.19707	0.539275	0.312784	0.32223	-0.553336	0.0620034	-0.53202	0.0750031	0.474151	0.119393	-0.867666	0.000254876	-0.390209	0.209838	0.573546	0.0512058	0.748706	0.00508223	-0.632776	0.027221	0.865376	0.000276594	0.492118	0.104122	0.429008	0.16403	-0.674297	0.0161759	0.408673	0.187166	0.578017	0.0490088	0.501107	0.0969951	-0.309213	0.328081	0.0702176	0.82833
ENSMUSG00000050730	8994329	9239101	Rho GTPase activating protein 42 [Source:MGI Symbol;Acc:MGI:1918794]	Arhgap42	protein_coding	-1	yellow	-0.203828	0.52516	-0.123295	0.702646	0.129242	0.68892	-0.524643	0.0799053	-0.495028	0.101777	0.383299	0.218732	-0.833052	0.000766166	-0.263116	0.408654	0.836868	0.000687162	0.539752	0.0700903	-0.628939	0.0284611	0.820984	0.00106302	0.324498	0.303445	0.410355	0.18518	-0.387521	0.21327	0.692818	0.012501	0.535782	0.072584	0.75197	0.00478935	-0.288141	0.363763	-0.0726797	0.822393
ENSMUSG00000030020	92370908	92706155	prickle planar cell polarity protein 2 [Source:MGI Symbol;Acc:MGI:1925144]	Prickle2	protein_coding	-1	yellow	0.125856	0.696725	-0.353392	0.259807	0.109706	0.734306	-0.478594	0.115487	-0.209597	0.513238	0.27804	0.381561	-0.650949	0.0218711	-0.421758	0.17206	0.821989	0.00103536	0.624337	0.0300021	-0.483512	0.111263	0.772919	0.00320117	0.554775	0.0611864	0.505137	0.0939094	-0.55648	0.0602284	0.464222	0.128431	0.577707	0.0491592	0.630037	0.0281023	-0.319235	0.311807	0.232357	0.467398
ENSMUSG00000052560	90487482	90679432	copine VIII [Source:MGI Symbol;Acc:MGI:1914121]	Cpne8	protein_coding	-1	yellow	-0.552225	0.0626393	-0.00207882	0.994884	0.340807	0.278339	-0.576141	0.0499223	-0.635356	0.0264091	0.388078	0.212557	-0.779101	0.00282005	0.0876091	0.786591	0.594453	0.041501	0.272416	0.391659	-0.402643	0.194395	0.745774	0.00535674	-0.039543	0.90289	0.177894	0.580169	-0.273069	0.39048	0.701547	0.011002	0.218661	0.494751	0.455886	0.136355	-0.455741	0.136495	-0.113956	0.72436
ENSMUSG00000021738	13961440	14107302	ataxin 7 [Source:MGI Symbol;Acc:MGI:2179277]	Atxn7	protein_coding	1	yellow	0.0884752	0.784525	0.0563445	0.861925	0.216658	0.498811	-0.368479	0.238562	-0.458347	0.133984	0.428591	0.164486	-0.797532	0.00188612	-0.397268	0.200982	0.447711	0.144427	0.73669	0.00627855	-0.726547	0.0074434	0.773911	0.00313754	0.472937	0.120474	0.626319	0.0293312	-0.820955	0.00106381	0.341055	0.277966	0.484374	0.110534	0.50606	0.0932119	-0.436312	0.156186	-0.175629	0.585077
ENSMUSG00000033530	100300770	100520826	tetratricopeptide repeat domain 7B [Source:MGI Symbol;Acc:MGI:2144724]	Ttc7b	protein_coding	-1	yellow	-0.127286	0.693427	-0.0606814	0.851398	0.243598	0.445489	-0.46682	0.126024	-0.536931	0.0718562	0.454662	0.137544	-0.894273	8.69119e-05	-0.354297	0.258502	0.503523	0.0951371	0.620908	0.0311885	-0.68779	0.0134302	0.800672	0.00175423	0.367998	0.239223	0.253763	0.426112	-0.626353	0.0293199	0.46355	0.129058	0.461873	0.130633	0.40168	0.195565	-0.354312	0.25848	-0.092382	0.775221
ENSMUSG00000106951	148990056	148995223	RIKEN cDNA 5930430L01 gene [Source:MGI Symbol;Acc:MGI:2443110]	5930430L01Rik	lincRNA	-1	yellow	0.312793	0.322216	-0.539534	0.0702258	-0.0474867	0.883489	-0.374749	0.230047	-0.0756209	0.815313	0.092812	0.774198	-0.531088	0.0756107	-0.669584	0.0172257	0.654056	0.0210395	0.570641	0.0526698	-0.385177	0.216292	0.613192	0.0339808	0.759731	0.00414406	0.249184	0.43479	-0.50107	0.0970241	0.135133	0.675411	0.528814	0.077108	0.31572	0.317463	-0.0391926	0.903747	0.455145	0.137074
ENSMUSG00000038843	17326141	17372844	glucosaminyl (N-acetyl) transferase 1, core 2 [Source:MGI Symbol;Acc:MGI:95676]	Gcnt1	protein_coding	-1	yellow	0.0403863	0.900828	-0.374789	0.229993	0.152843	0.635335	-0.616843	0.0326381	-0.278605	0.380553	0.191539	0.550944	-0.782002	0.00265366	-0.537044	0.071785	0.827963	0.000882262	0.621702	0.0309109	-0.646265	0.0231693	0.819118	0.00111585	0.634783	0.0265879	0.261968	0.410778	-0.54467	0.0670832	0.401232	0.196112	0.700518	0.0111713	0.544973	0.0669011	-0.128288	0.691117	0.051529	0.873638
ENSMUSG00000071337	86404219	86433405	cytotoxic granule-associated RNA binding protein 1 [Source:MGI Symbol;Acc:MGI:107914]	Tia1	protein_coding	1	yellow	-0.446587	0.14556	0.0634005	0.844808	0.446414	0.145735	-0.624926	0.0298016	-0.760395	0.00409211	0.575563	0.0502063	-0.84488	0.00054185	0.0293788	0.927784	0.428408	0.164686	0.449676	0.142459	-0.304409	0.336042	0.773234	0.00318086	-0.0114469	0.971835	0.254957	0.423863	-0.542077	0.0686574	0.647677	0.0227724	0.194713	0.544235	0.297612	0.347481	-0.601916	0.0383775	0.0996868	0.757899
ENSMUSG00000026670	170141938	170174957	UDP-N-acetylglucosamine pyrophosphorylase 1 [Source:MGI Symbol;Acc:MGI:1334459]	Uap1	protein_coding	-1	yellow	-0.00171219	0.995786	-0.330488	0.294081	0.468481	0.124501	-0.826869	0.000908893	-0.346572	0.269757	0.318066	0.313683	-0.627761	0.0288502	-0.180936	0.573599	0.6399	0.0250222	0.584537	0.0459247	-0.303366	0.337783	0.785208	0.00247851	0.393886	0.205196	0.409736	0.18591	-0.517132	0.085117	0.40934	0.186378	0.575763	0.0501078	0.475951	0.117799	-0.286403	0.366793	0.187819	0.55885
ENSMUSG00000035399	163405822	163424697	oxidative stress responsive serine rich 1 [Source:MGI Symbol;Acc:MGI:1913930]	Oser1	protein_coding	-1	yellow	0.0073009	0.982034	-0.328699	0.296861	0.128719	0.690126	-0.445613	0.146547	-0.261732	0.411215	0.200039	0.533054	-0.374005	0.231047	-0.136411	0.672492	0.589699	0.0435822	0.376966	0.22708	-0.108918	0.736154	0.527837	0.0777572	0.285679	0.36806	0.517588	0.0847944	-0.281062	0.376189	0.358785	0.252089	0.352965	0.260422	0.496989	0.100218	-0.244662	0.44344	0.362613	0.246696
ENSMUSG00000028883	13125414	13602565	sema domain, immunoglobulin domain (Ig), short basic domain, secreted, (semaphorin) 3A [Source:MGI Symbol;Acc:MGI:107558]	Sema3a	protein_coding	1	yellow	0.0285708	0.929766	-0.0470043	0.884665	0.27914	0.3796	-0.559491	0.0585616	-0.44101	0.151268	0.438337	0.154053	-0.885592	0.000127022	-0.402889	0.194097	0.69757	0.0116674	0.77771	0.00290263	-0.775945	0.00301001	0.896147	7.97361e-05	0.502396	0.0960006	0.586813	0.0448814	-0.798758	0.00183374	0.513467	0.0877413	0.658982	0.019769	0.665021	0.0182889	-0.431815	0.160986	-0.177558	0.580896
ENSMUSG00000041377	120093350	120200339	ninjurin 2 [Source:MGI Symbol;Acc:MGI:1352751]	Ninj2	protein_coding	1	yellow	0.18667	0.561301	-0.332823	0.290476	-0.106603	0.741592	-0.359517	0.251053	-0.181855	0.571623	0.14406	0.655107	-0.684893	0.0139883	-0.674948	0.0160346	0.802173	0.00169375	0.637981	0.0256015	-0.703819	0.0106347	0.679499	0.0150727	0.702862	0.0107883	0.403291	0.19361	-0.555607	0.0607177	0.335043	0.287072	0.725268	0.00760099	0.617281	0.0324798	-0.079665	0.805599	0.0435098	0.893195
ENSMUSG00000023927	51736187	51833290	special AT-rich sequence binding protein 1 [Source:MGI Symbol;Acc:MGI:105084]	Satb1	protein_coding	-1	yellow	0.409656	0.186003	-0.251947	0.429543	0.0801015	0.804552	-0.43707	0.155385	-0.0278901	0.931435	0.213783	0.504663	-0.593673	0.0418379	-0.588051	0.044321	0.659394	0.0196654	0.766145	0.00366241	-0.771871	0.00326944	0.693664	0.0123495	0.735697	0.006386	0.62864	0.0285595	-0.677433	0.0155039	0.252695	0.428128	0.817717	0.00115683	0.691166	0.0128008	-0.146881	0.648732	-0.169483	0.598479
ENSMUSG00000030059	97152997	97179122	TATA element modulatory factor 1 [Source:MGI Symbol;Acc:MGI:2684999]	Tmf1	protein_coding	-1	yellow	0.125241	0.698145	-0.192031	0.549903	0.351415	0.262668	-0.656423	0.0204219	-0.307502	0.330903	0.508678	0.091253	-0.735946	0.00635896	-0.243483	0.445711	0.747586	0.00518583	0.775742	0.00302256	-0.634336	0.026728	0.863221	0.000298323	0.43264	0.160098	0.669238	0.0173046	-0.59532	0.0411291	0.602758	0.0380359	0.751297	0.00484865	0.832048	0.000788084	-0.378641	0.224854	-0.073886	0.819488
ENSMUSG00000020659	31484829	31499616	Casitas B-lineage lymphoma-like 1 [Source:MGI Symbol;Acc:MGI:2144842]	Cbll1	protein_coding	-1	yellow	0.151014	0.639436	-0.250732	0.431845	0.128585	0.690433	-0.594064	0.0416688	-0.105453	0.744297	0.201115	0.530807	-0.583974	0.0461859	-0.370546	0.235734	0.894987	8.41214e-05	0.601764	0.0384395	-0.502742	0.0957353	0.753667	0.00464219	0.54799	0.0651042	0.621757	0.0308915	-0.542314	0.0685125	0.514912	0.0867004	0.646782	0.0230234	0.764117	0.00380987	-0.302919	0.338532	0.02922	0.928173
ENSMUSG00000019966	100015630	100100416	kit ligand [Source:MGI Symbol;Acc:MGI:96974]	Kitl	protein_coding	1	yellow	0.273339	0.389992	-0.409879	0.185741	0.0586604	0.856301	-0.491021	0.105015	-0.178241	0.579418	0.176876	0.582372	-0.718586	0.0084655	-0.690946	0.0128412	0.773912	0.00313745	0.738485	0.00608761	-0.699605	0.0113233	0.769501	0.00342801	0.79149	0.00216113	0.408734	0.187094	-0.659802	0.0195631	0.258068	0.418031	0.783197	0.00258731	0.562729	0.0568058	-0.0859988	0.790436	0.096509	0.765422
ENSMUSG00000020515	58104153	58118594	CCR4-NOT transcription complex, subunit 8 [Source:MGI Symbol;Acc:MGI:1916375]	Cnot8	protein_coding	1	yellow	-0.374627	0.230211	-0.205186	0.522342	0.445314	0.146851	-0.763828	0.0038312	-0.574259	0.050851	0.441009	0.151269	-0.736149	0.00633689	-0.0247644	0.939106	0.551084	0.0632971	0.401418	0.195885	-0.2077	0.517145	0.732675	0.00672185	0.0771181	0.811714	0.102479	0.751304	-0.403177	0.193748	0.603783	0.0376228	0.35377	0.25926	0.29163	0.357719	-0.424466	0.169032	0.238396	0.455565
ENSMUSG00000014956	32458843	32517433	protein phosphatase 1 catalytic subunit beta [Source:MGI Symbol;Acc:MGI:104871]	Ppp1cb	protein_coding	1	yellow	-0.538695	0.0707483	0.101824	0.752848	0.527731	0.0778273	-0.733914	0.00658261	-0.691781	0.0126886	0.554828	0.0611567	-0.843852	0.000559021	0.211997	0.508314	0.615019	0.0333042	0.42304	0.170623	-0.54158	0.0689622	0.835804	0.000708522	-0.112656	0.727399	0.383808	0.218069	-0.348166	0.267411	0.836998	0.000684594	0.432673	0.160064	0.691319	0.0127728	-0.530891	0.0757399	-0.359038	0.251731
ENSMUSG00000052727	99421446	99516540	microtubule-associated protein 1B [Source:MGI Symbol;Acc:MGI:1306778]	Map1b	protein_coding	-1	yellow	-0.183915	0.567198	0.0715132	0.825205	0.378747	0.224713	-0.484773	0.110197	-0.643324	0.0240127	0.630644	0.0279052	-0.862631	0.00030449	-0.112556	0.727632	0.469732	0.123362	0.635704	0.0263011	-0.489206	0.106503	0.842986	0.000573808	0.183737	0.567579	0.489753	0.106053	-0.684275	0.0141096	0.60323	0.0378453	0.282473	0.373694	0.459654	0.132735	-0.629533	0.0282666	0.042785	0.894965
ENSMUSG00000044148	12654879	12673668	RIKEN cDNA 1810030O07 gene [Source:MGI Symbol;Acc:MGI:1916405]	1810030O07Rik	protein_coding	-1	yellow	-0.446621	0.145526	0.0152434	0.962499	0.472067	0.121254	-0.650762	0.0219219	-0.521956	0.0817442	0.578821	0.0486211	-0.626108	0.029402	0.240845	0.450808	0.412734	0.182393	0.30558	0.334091	-0.117182	0.716838	0.635051	0.026504	-0.203902	0.525006	0.212145	0.50801	-0.362307	0.247125	0.75641	0.00441155	0.173363	0.590005	0.32332	0.305306	-0.679041	0.0151674	0.120134	0.709973
ENSMUSG00000021253	86056745	86079041	transforming growth factor, beta 3 [Source:MGI Symbol;Acc:MGI:98727]	Tgfb3	protein_coding	-1	yellow	0.275857	0.385463	-0.0632247	0.845234	0.256857	0.420297	-0.443545	0.148656	-0.21419	0.503833	0.356216	0.255749	-0.607821	0.0360274	-0.396206	0.202299	0.410201	0.185361	0.720777	0.00817433	-0.539808	0.0700556	0.689346	0.0131373	0.533682	0.0739281	0.622419	0.0306617	-0.822463	0.00102251	0.240114	0.452227	0.495402	0.101479	0.417276	0.177145	-0.423123	0.17053	-0.019618	0.951746
ENSMUSG00000037808	13827716	13854987	family with sequence similarity 76, member B [Source:MGI Symbol;Acc:MGI:1920076]	Fam76b	protein_coding	1	yellow	-0.218047	0.495993	-0.305434	0.334334	0.597206	0.0403287	-0.945746	3.37844e-06	-0.359548	0.25101	0.408039	0.187919	-0.666087	0.0180363	0.0154577	0.961972	0.642409	0.0242795	0.462066	0.130451	-0.224623	0.482756	0.805591	0.00156195	0.17085	0.59549	0.168742	0.600104	-0.405273	0.191221	0.603096	0.0378995	0.490971	0.105056	0.401616	0.195643	-0.407424	0.18865	0.161299	0.616504
ENSMUSG00000087142	43504428	43508747	predicted gene 12454 [Source:MGI Symbol;Acc:MGI:3649695]	Gm12454	antisense	-1	yellow	-0.193806	0.546149	-0.564191	0.0560251	0.337214	0.283764	-0.75139	0.00484046	-0.269723	0.396543	0.260636	0.413248	-0.466523	0.126297	-0.0692552	0.830652	0.602845	0.0380008	0.261081	0.412423	0.105987	0.743041	0.591873	0.0426218	0.182865	0.569452	-0.074079	0.819024	-0.146426	0.649759	0.465677	0.12708	0.298988	0.345148	0.168016	0.601695	-0.225438	0.481128	0.65479	0.0208468
ENSMUSG00000045103	82948870	85206141	dystrophin, muscular dystrophy [Source:MGI Symbol;Acc:MGI:94909]	Dmd	protein_coding	1	yellow	-0.0726989	0.822347	-0.0222638	0.945246	0.273577	0.389564	-0.534177	0.0736098	-0.545643	0.0664989	0.419773	0.1743	-0.89297	9.21917e-05	-0.358086	0.253082	0.678916	0.0151935	0.713028	0.00923888	-0.693608	0.0123593	0.885622	0.000126859	0.444595	0.147583	0.55661	0.0601556	-0.761994	0.00396897	0.50519	0.093869	0.544839	0.0669817	0.60325	0.0378375	-0.439036	0.153322	-0.103577	0.748715
ENSMUSG00000038127	27388869	27452218	coiled-coil domain containing 50 [Source:MGI Symbol;Acc:MGI:1914751]	Ccdc50	protein_coding	1	yellow	0.195916	0.5417	-0.105491	0.744206	0.249862	0.433498	-0.589462	0.0436881	-0.0507246	0.875597	0.280775	0.376697	-0.617644	0.0323487	-0.358387	0.252654	0.689482	0.013112	0.666487	0.0179422	-0.652434	0.0214709	0.741649	0.00576164	0.509863	0.0903751	0.577651	0.049186	-0.724217	0.00773244	0.456174	0.136076	0.683413	0.0142798	0.645497	0.0233875	-0.420768	0.173175	-0.227435	0.477145
ENSMUSG00000063334	111972664	111988432	KRR1, small subunit (SSU) processome component, homolog (yeast) [Source:MGI Symbol;Acc:MGI:1289274]	Krr1	protein_coding	1	yellow	-0.259367	0.415609	0.0488945	0.880056	0.618809	0.0319312	-0.745847	0.00534977	-0.405553	0.190886	0.501612	0.096605	-0.619357	0.031736	0.158579	0.62254	0.362224	0.24724	0.438575	0.153804	-0.248939	0.435255	0.707579	0.010047	-0.0235345	0.942126	0.363608	0.245304	-0.612429	0.0342665	0.576305	0.0498423	0.285583	0.368228	0.305192	0.334736	-0.710094	0.00966783	-0.0693865	0.830336
ENSMUSG00000035829	28446800	28455508	protein phosphatase 1, regulatory subunit 26 [Source:MGI Symbol;Acc:MGI:2685193]	Ppp1r26	protein_coding	1	yellow	0.0500245	0.877303	0.53434	0.0735047	0.243711	0.445272	0.0170196	0.958132	0.00252045	0.993797	0.344915	0.272208	-0.0387958	0.904717	0.303221	0.338026	0.0566283	0.861235	0.140572	0.663015	0.112239	0.728375	0.141053	0.661922	-0.207102	0.518379	0.285235	0.368837	-0.229659	0.47273	0.341237	0.277693	-0.301935	0.340182	0.182446	0.570351	-0.467577	0.125329	-0.0929121	0.773961
ENSMUSG00000021171	116281196	116391050	extended synaptotagmin-like protein 2 [Source:MGI Symbol;Acc:MGI:1261845]	Esyt2	protein_coding	1	yellow	-0.201634	0.529725	-0.321339	0.308449	0.346429	0.269969	-0.693896	0.0123081	-0.505203	0.0938591	0.535686	0.0726453	-0.860781	0.000324497	-0.178601	0.57864	0.81273	0.00131218	0.60694	0.0363716	-0.520184	0.0829725	0.889006	0.000109817	0.273516	0.389674	0.252971	0.427605	-0.3711	0.23498	0.736492	0.00629986	0.626685	0.0292086	0.671412	0.0168127	-0.321014	0.308967	0.139096	0.666372
ENSMUSG00000083813	137896752	137896959	predicted gene 15502 [Source:MGI Symbol;Acc:MGI:3782949]	Gm15502	processed_pseudogene	-1	yellow	0.288488	0.36316	-0.615001	0.0333108	-0.0442033	0.891501	-0.312752	0.322282	-0.00144002	0.996456	0.074363	0.81834	-0.447763	0.144374	-0.609057	0.0355491	0.603378	0.0377856	0.506451	0.0929175	-0.359271	0.251401	0.533246	0.074209	0.678109	0.0153618	0.175092	0.586244	-0.43519	0.157375	0.11083	0.731673	0.560922	0.0577811	0.277352	0.382788	-0.0442404	0.891411	0.451666	0.140485
ENSMUSG00000022292	37923952	37961318	ribonucleotide reductase M2 B (TP53 inducible) [Source:MGI Symbol;Acc:MGI:2155865]	Rrm2b	protein_coding	-1	yellow	0.108458	0.737234	-0.14365	0.656033	0.17784	0.580285	-0.515622	0.0861916	-0.326564	0.300197	0.410049	0.18554	-0.805741	0.00155637	-0.472301	0.121043	0.701177	0.0110626	0.726328	0.00747018	-0.604576	0.0373059	0.827737	0.00088771	0.547662	0.0652981	0.458154	0.134168	-0.743024	0.00562422	0.490904	0.10511	0.553615	0.0618443	0.537473	0.0715147	-0.405663	0.190753	0.0887581	0.78385
ENSMUSG00000032086	45838580	45864399	beta-site APP cleaving enzyme 1 [Source:MGI Symbol;Acc:MGI:1346542]	Bace1	protein_coding	1	yellow	0.0212577	0.947718	-0.179728	0.576204	-0.0361062	0.911299	-0.252144	0.42917	-0.50737	0.0922284	0.304787	0.335412	-0.837757	0.000669698	-0.591698	0.0426986	0.515643	0.0861768	0.621996	0.0308084	-0.782302	0.00263686	0.690585	0.0129075	0.565627	0.0552655	0.237469	0.457373	-0.471334	0.121913	0.275415	0.386257	0.53776	0.0713342	0.450289	0.141849	-0.00724815	0.982164	-0.0500921	0.877138
ENSMUSG00000038206	56551090	56593939	F-box protein 8 [Source:MGI Symbol;Acc:MGI:1354696]	Fbxo8	protein_coding	1	yellow	-0.162977	0.612793	-0.0354472	0.912913	0.213699	0.504835	-0.518828	0.0839206	-0.459018	0.133341	0.233002	0.466127	-0.77589	0.00301341	-0.285291	0.36874	0.708849	0.00985415	0.547889	0.0651637	-0.724047	0.00775376	0.779933	0.00277152	0.377624	0.226204	0.513757	0.0875322	-0.568794	0.0536158	0.469829	0.123273	0.588955	0.0439146	0.667995	0.0175908	-0.296945	0.348615	-0.318055	0.3137
ENSMUSG00000020689	104608000	104670476	integrin beta 3 [Source:MGI Symbol;Acc:MGI:96612]	Itgb3	protein_coding	1	yellow	0.170324	0.596639	-0.186974	0.560653	0.121623	0.706518	-0.365882	0.242144	-0.350099	0.264584	0.33888	0.281241	-0.773952	0.00313493	-0.527857	0.0777435	0.516247	0.0857455	0.745115	0.00541997	-0.913589	3.27714e-05	0.717201	0.00865348	0.587709	0.0444753	0.437841	0.154574	-0.568327	0.0538572	0.270544	0.395051	0.792804	0.00209887	0.627883	0.0288094	-0.0524188	0.871472	-0.294654	0.352524
ENSMUSG00000039166	25169090	25307870	A kinase (PRKA) anchor protein 7 [Source:MGI Symbol;Acc:MGI:1859150]	Akap7	protein_coding	-1	yellow	-0.473758	0.119742	0.252651	0.428211	0.378311	0.225291	-0.48062	0.113735	-0.679072	0.0151611	0.364693	0.243793	-0.586554	0.0449992	0.240552	0.451376	0.29856	0.345873	0.220624	0.490786	-0.200502	0.532087	0.594188	0.041615	-0.139251	0.666019	0.453978	0.138212	-0.333684	0.289154	0.515949	0.0859584	-0.0352291	0.913447	0.348956	0.266254	-0.527615	0.0779047	-0.145267	0.652376
ENSMUSG00000032425	88548020	88571061	zinc finger protein 949 [Source:MGI Symbol;Acc:MGI:1918890]	Zfp949	protein_coding	1	yellow	-0.0570285	0.860263	-0.292564	0.35611	0.303363	0.337788	-0.734111	0.00656064	-0.191638	0.550734	0.158253	0.623263	-0.512132	0.0887114	-0.209135	0.514189	0.749751	0.00498704	0.430208	0.162725	-0.139211	0.66611	0.684277	0.014109	0.360097	0.250233	0.390153	0.209909	-0.576657	0.0496699	0.451494	0.140654	0.425334	0.168069	0.3874	0.213427	-0.449882	0.142254	0.313627	0.320858
ENSMUSG00000040389	108591279	108645719	WD repeat domain 47 [Source:MGI Symbol;Acc:MGI:2139593]	Wdr47	protein_coding	1	yellow	-0.00227192	0.994409	-0.22869	0.474651	0.398601	0.199336	-0.602508	0.038137	-0.22025	0.491542	0.356844	0.254851	-0.447091	0.145051	0.0532924	0.869346	0.558763	0.0589618	0.491553	0.104581	-0.415517	0.179166	0.633581	0.0269657	0.173916	0.588801	0.600491	0.0389606	-0.283864	0.371244	0.487254	0.10812	0.624507	0.0299441	0.742039	0.00572248	-0.287806	0.364346	-0.15152	0.638299
ENSMUSG00000053641	64811340	64919667	DENN/MADD domain containing 4A [Source:MGI Symbol;Acc:MGI:2142979]	Dennd4a	protein_coding	1	yellow	-0.0340925	0.91623	-0.312341	0.322953	0.304888	0.335242	-0.559476	0.0585703	-0.191148	0.551773	0.279372	0.379187	-0.5863	0.045115	-0.240518	0.451442	0.615863	0.0329946	0.494629	0.102097	-0.350503	0.263995	0.689289	0.013148	0.338381	0.281996	0.29122	0.358427	-0.608047	0.0359398	0.421776	0.17204	0.486795	0.108502	0.350162	0.264492	-0.478505	0.115565	0.18682	0.560981
ENSMUSG00000106838	114975456	114976013	RIKEN cDNA 1810017P11 gene [Source:MGI Symbol;Acc:MGI:1916294]	1810017P11Rik	TEC	1	yellow	-0.456844	0.135428	0.0840673	0.795053	0.211779	0.508761	-0.428738	0.164326	-0.647052	0.0229474	0.384843	0.216725	-0.849399	0.000471133	-0.0875886	0.78664	0.528097	0.0775835	0.363269	0.245778	-0.670084	0.0171121	0.714656	0.00900711	0.0722083	0.823529	0.182128	0.571035	-0.314888	0.318809	0.614867	0.0333601	0.341146	0.277829	0.508728	0.0912158	-0.30823	0.329701	-0.349522	0.265427
ENSMUSG00000031841	118283733	119324921	cadherin 13 [Source:MGI Symbol;Acc:MGI:99551]	Cdh13	protein_coding	1	yellow	0.160459	0.618365	-0.259239	0.415847	0.293743	0.354084	-0.619034	0.0318511	-0.222405	0.487203	0.286026	0.367452	-0.636053	0.0261928	-0.375431	0.229132	0.687504	0.0134846	0.65628	0.0204589	-0.369951	0.236547	0.793031	0.00208826	0.55571	0.0606598	0.518226	0.0843437	-0.732282	0.00676653	0.366764	0.240924	0.489333	0.106398	0.451317	0.140829	-0.42229	0.171463	0.252815	0.427901
ENSMUSG00000087403	152294828	152327495	Kdm5c adjacent non-coding transcript [Source:MGI Symbol;Acc:MGI:1920247]	Kantr	protein_coding	-1	yellow	0.0668673	0.836421	-0.0463765	0.886197	0.211602	0.509122	-0.45649	0.13577	-0.238152	0.456042	0.244049	0.444621	-0.687276	0.0135279	-0.347385	0.268559	0.613712	0.0337872	0.608944	0.0355923	-0.740109	0.00591861	0.746547	0.00528332	0.478549	0.115526	0.541012	0.0693114	-0.65268	0.0214049	0.374981	0.229735	0.578362	0.0488419	0.608099	0.0359195	-0.334064	0.288571	-0.320884	0.309173
ENSMUSG00000072258	183388981	183410198	TATA-box binding protein associated factor, RNA polymerase I, A [Source:MGI Symbol;Acc:MGI:109578]	Taf1a	protein_coding	1	yellow	0.0129084	0.96824	-0.0172876	0.957473	0.362124	0.24738	-0.538606	0.0708038	-0.221138	0.489751	0.504233	0.0945955	-0.532375	0.0747723	-0.0331831	0.918458	0.401531	0.195747	0.504041	0.0947422	-0.247831	0.437369	0.633339	0.0270423	0.151317	0.638756	0.436809	0.15566	-0.566101	0.0550162	0.540406	0.0696852	0.275553	0.38601	0.377032	0.226992	-0.611538	0.0346022	0.104166	0.747326
ENSMUSG00000103632	160727734	160728160	predicted gene, 38329 [Source:MGI Symbol;Acc:MGI:5611557]	Gm38329	TEC	-1	yellow	0.00635837	0.984353	-0.524035	0.0803193	0.280122	0.377855	-0.674999	0.0160236	0.0339244	0.916642	0.108334	0.737526	-0.376236	0.228054	-0.116285	0.718927	0.740377	0.0058911	0.360768	0.249286	-0.396552	0.20187	0.57455	0.0507067	0.309434	0.327716	0.249849	0.433524	-0.138524	0.667673	0.433403	0.15928	0.761069	0.00403982	0.643299	0.0240198	-0.0807941	0.802891	-0.0562392	0.862181
ENSMUSG00000041974	15889224	16146851	scaffolding protein involved in DNA repair [Source:MGI Symbol;Acc:MGI:1924834]	Spidr	protein_coding	-1	yellow	0.222996	0.486016	-0.153079	0.634808	0.570596	0.0526929	-0.476186	0.117593	-0.0213409	0.947513	0.462646	0.129906	-0.465118	0.127597	-0.0702124	0.828342	0.609075	0.035542	0.633687	0.0269323	-0.306546	0.332487	0.664723	0.0183601	0.294531	0.352734	0.123687	0.701739	-0.436722	0.155752	0.424733	0.168736	0.509384	0.0907291	0.478928	0.115197	-0.251496	0.430396	0.0949754	0.76906
ENSMUSG00000037129	45319100	45347581	transmembrane protease, serine 13 [Source:MGI Symbol;Acc:MGI:2682935]	Tmprss13	protein_coding	1	yellow	0.0769142	0.812204	0.192464	0.548985	0.339097	0.280913	-0.244305	0.444128	0.144902	0.653202	0.345316	0.271613	-0.209905	0.512606	0.0939332	0.771534	0.460816	0.131631	0.308383	0.329448	0.0152688	0.962436	0.367205	0.240315	-0.00319757	0.992131	0.137475	0.670065	-0.45905	0.133311	0.504702	0.0942391	0.063443	0.844706	0.253981	0.4257	-0.588079	0.0443083	0.113459	0.725522
ENSMUSG00000026674	169972307	170110762	discoidin domain receptor family, member 2 [Source:MGI Symbol;Acc:MGI:1345277]	Ddr2	protein_coding	-1	yellow	0.158146	0.623502	-0.206903	0.518791	0.363501	0.245453	-0.635729	0.0262932	-0.267247	0.40106	0.361642	0.248057	-0.714563	0.00902021	-0.391861	0.207745	0.611552	0.0345968	0.731727	0.00682988	-0.505478	0.0936515	0.821696	0.00104335	0.54651	0.0659816	0.492647	0.103693	-0.82001	0.00109035	0.36008	0.250258	0.580188	0.0479661	0.438794	0.153575	-0.442426	0.149806	0.107548	0.73937
ENSMUSG00000076672	114288152	114288582	immunoglobulin heavy variable 3-6 [Source:MGI Symbol;Acc:MGI:4439856]	Ighv3-6	IG_V_gene	-1	yellow	-0.270135	0.395794	-0.210921	0.51052	0.400034	0.197576	-0.805671	0.00155898	-0.158714	0.622239	0.183177	0.568782	-0.497585	0.0997472	0.0400151	0.901735	0.589665	0.0435978	0.246862	0.439222	-0.375707	0.228762	0.57725	0.0493808	0.0813418	0.801578	0.0628145	0.846228	-0.15573	0.628884	0.553105	0.0621354	0.559371	0.0586279	0.470306	0.122841	-0.194371	0.544956	-0.274837	0.387295
ENSMUSG00000024236	4920540	5119299	supervillin [Source:MGI Symbol;Acc:MGI:2147319]	Svil	protein_coding	1	yellow	0.0868066	0.788506	-0.226565	0.478878	0.124241	0.700458	-0.423548	0.170055	-0.397243	0.201013	0.330852	0.293518	-0.825026	0.000955177	-0.560128	0.0582135	0.668346	0.0175096	0.708709	0.00987528	-0.639542	0.0251295	0.809308	0.00142774	0.610777	0.0348905	0.382759	0.219436	-0.726786	0.00741415	0.355969	0.256102	0.553138	0.0621162	0.454855	0.137356	-0.294101	0.353471	0.138425	0.667899
ENSMUSG00000022361	58047003	58076541	zinc fingers and homeoboxes 1 [Source:MGI Symbol;Acc:MGI:109271]	Zhx1	protein_coding	-1	yellow	0.120238	0.709731	-0.161026	0.617109	0.326628	0.300098	-0.568138	0.0539549	-0.287288	0.365249	0.372804	0.232669	-0.741141	0.00581309	-0.320749	0.30939	0.693798	0.0123255	0.748401	0.00511029	-0.778481	0.00285665	0.841261	0.000604184	0.500742	0.0972778	0.629771	0.0281889	-0.652808	0.0213709	0.448062	0.144074	0.768926	0.00346734	0.765917	0.00367875	-0.313493	0.321075	-0.26524	0.404741
ENSMUSG00000037730	30602065	30619873	myoneurin [Source:MGI Symbol;Acc:MGI:1931415]	Mynn	protein_coding	1	yellow	-0.351409	0.262677	-0.179344	0.577033	0.32544	0.301962	-0.706542	0.0102068	-0.35359	0.259521	0.214649	0.502898	-0.564962	0.0556166	0.0533239	0.869269	0.801264	0.00173019	0.311645	0.32409	-0.357043	0.254568	0.675031	0.0160167	0.078817	0.807634	0.397259	0.200993	-0.253621	0.426378	0.666211	0.0180072	0.540296	0.0697533	0.698391	0.0115276	-0.345443	0.271426	-0.132852	0.680633
ENSMUSG00000039115	118606690	118901003	integrin alpha 9 [Source:MGI Symbol;Acc:MGI:104756]	Itga9	protein_coding	1	yellow	-0.0547045	0.865911	-0.021273	0.94768	0.0268113	0.934082	-0.192126	0.549699	-0.603065	0.0379117	0.471961	0.121349	-0.67073	0.0169659	-0.308377	0.329458	0.25308	0.4274	0.497818	0.0995637	-0.332933	0.290307	0.538779	0.0706962	0.262904	0.409046	0.299881	0.34364	-0.43518	0.157385	0.323298	0.305341	0.152028	0.637162	0.236096	0.460055	-0.256312	0.421318	0.282957	0.372841
ENSMUSG00000025766	41742611	41803320	DNA segment, Chr 3, ERATO Doi 751, expressed [Source:MGI Symbol;Acc:MGI:1289213]	D3Ertd751e	protein_coding	1	yellow	-0.205635	0.521412	-0.272125	0.392185	0.409425	0.186277	-0.713765	0.00913338	-0.296426	0.349498	0.409906	0.185709	-0.598497	0.039787	0.00944369	0.976762	0.696427	0.0118639	0.388936	0.211459	-0.101981	0.75248	0.751863	0.00479868	0.139695	0.665008	0.227786	0.476446	-0.391971	0.207605	0.668593	0.0174526	0.2732	0.390242	0.393412	0.20579	-0.552091	0.062716	0.367587	0.239788
ENSMUSG00000030322	115840697	115853371	methyl-CpG binding domain protein 4 [Source:MGI Symbol;Acc:MGI:1333850]	Mbd4	protein_coding	-1	yellow	0.144584	0.653919	-0.269811	0.396384	0.237949	0.456438	-0.617748	0.0323112	-0.135786	0.673918	0.3045	0.33589	-0.630988	0.0277937	-0.418408	0.175852	0.621535	0.0309689	0.613095	0.034017	-0.422101	0.171674	0.700312	0.0112055	0.505511	0.093626	0.281844	0.374806	-0.658784	0.019819	0.39906	0.198771	0.566826	0.0546368	0.369305	0.237429	-0.347893	0.267813	0.171667	0.593703
ENSMUSG00000034593	75071015	75223688	myosin VA [Source:MGI Symbol;Acc:MGI:105976]	Myo5a	protein_coding	1	yellow	-0.156293	0.627627	-0.00472679	0.988368	0.529035	0.0769611	-0.70472	0.0104916	-0.274102	0.388617	0.487188	0.108175	-0.608991	0.0355744	0.108806	0.736417	0.457499	0.134797	0.487667	0.107776	-0.526306	0.0787817	0.691813	0.0126827	0.0414824	0.898148	0.38551	0.215862	-0.420667	0.173289	0.623833	0.0301742	0.559779	0.0584039	0.593812	0.0417775	-0.470644	0.122535	-0.381558	0.221007
ENSMUSG00000036103	9707595	9882644	collectin sub-family member 12 [Source:MGI Symbol;Acc:MGI:2152907]	Colec12	protein_coding	1	yellow	-0.305327	0.334512	0.400656	0.196814	0.43139	0.161445	-0.500279	0.0976375	-0.399709	0.197974	0.350894	0.263426	-0.521533	0.0820366	0.245511	0.441811	0.283315	0.37221	0.302406	0.339391	-0.444822	0.147351	0.576494	0.0497499	-0.10735	0.739837	0.610108	0.0351456	-0.48226	0.112329	0.534309	0.073525	0.164108	0.610295	0.504889	0.0940974	-0.623651	0.0302366	-0.590264	0.0433312
ENSMUSG00000009828	78109192	78172107	ciliogenesis associated kinase 1 [Source:MGI Symbol;Acc:MGI:1934157]	Cilk1	protein_coding	1	yellow	-0.575035	0.0504665	-0.0255765	0.937113	0.193345	0.547122	-0.366322	0.241534	-0.679337	0.0151062	0.448805	0.143329	-0.651456	0.0217338	0.114016	0.724219	0.310859	0.325376	0.100875	0.75509	-0.0468515	0.885038	0.526971	0.0783356	-0.176683	0.582792	-0.127134	0.693777	-0.0812434	0.801814	0.604822	0.0372078	-0.152007	0.637208	0.0748402	0.817191	-0.400141	0.197445	0.320212	0.310246
ENSMUSG00000024975	53892231	53929860	programmed cell death 4 [Source:MGI Symbol;Acc:MGI:107490]	Pdcd4	protein_coding	1	yellow	0.133046	0.680189	-0.462362	0.130172	-0.0665318	0.837232	-0.414886	0.179895	-0.189683	0.554882	0.0953589	0.76815	-0.689556	0.0130983	-0.689993	0.013017	0.820463	0.00107755	0.587163	0.0447225	-0.621506	0.0309791	0.684496	0.014066	0.713687	0.0091446	0.212032	0.508242	-0.500358	0.097576	0.292866	0.355591	0.710694	0.00957888	0.493961	0.102633	-0.0139758	0.965615	0.182886	0.569405
ENSMUSG00000022108	73362226	73385289	integral membrane protein 2B [Source:MGI Symbol;Acc:MGI:1309517]	Itm2b	protein_coding	-1	yellow	0.140091	0.664108	-0.355811	0.256328	-0.077038	0.811907	-0.338742	0.281449	-0.244627	0.443509	0.0230832	0.943234	-0.685785	0.0138147	-0.717257	0.00864585	0.665497	0.0181759	0.573757	0.0511007	-0.73838	0.0060986	0.634964	0.0265313	0.737547	0.00618674	0.234732	0.462727	-0.515221	0.086479	0.131308	0.684174	0.69137	0.0127636	0.438771	0.153599	0.0882649	0.785026	-0.0330634	0.918752
ENSMUSG00000039458	12205028	12274496	myotubularin related protein 12 [Source:MGI Symbol;Acc:MGI:2443034]	Mtmr12	protein_coding	1	yellow	0.236969	0.458348	-0.435538	0.157006	0.139864	0.664625	-0.57962	0.0482374	-0.152978	0.635032	0.305013	0.335035	-0.716857	0.00870071	-0.567934	0.0540606	0.823967	0.000982572	0.740438	0.00588483	-0.629961	0.028127	0.791756	0.0021484	0.677448	0.0155008	0.357836	0.253438	-0.574591	0.0506866	0.42593	0.16741	0.811367	0.00135733	0.631713	0.0275605	-0.146874	0.648749	0.151025	0.63941
ENSMUSG00000035725	77761411	77796278	protein kinase, X-linked [Source:MGI Symbol;Acc:MGI:1309999]	Prkx	protein_coding	-1	yellow	-0.248352	0.436374	0.232635	0.466849	0.414522	0.180315	-0.59456	0.041455	-0.507354	0.0922402	0.534706	0.0732708	-0.734216	0.00654906	0.116876	0.717551	0.669988	0.0171338	0.55494	0.0610933	-0.564335	0.0559488	0.823204	0.00100269	0.0453313	0.888748	0.787877	0.00233963	-0.556765	0.0600694	0.795226	0.00198769	0.423653	0.169938	0.860056	0.000332618	-0.661446	0.0191549	-0.376306	0.227961
ENSMUSG00000005371	87990859	88065291	F-box protein 11 [Source:MGI Symbol;Acc:MGI:2147134]	Fbxo11	protein_coding	-1	yellow	-0.353535	0.2596	0.0510014	0.874923	0.428301	0.164803	-0.710536	0.00960228	-0.533791	0.0738578	0.537782	0.0713205	-0.865675	0.000273678	0.0139978	0.965561	0.791398	0.00216553	0.535219	0.0729431	-0.544623	0.0671114	0.904518	5.31454e-05	0.091564	0.777167	0.448073	0.144063	-0.526417	0.0787072	0.866269	0.000267963	0.459168	0.133198	0.723934	0.00776807	-0.616758	0.0326692	-0.183771	0.567507
ENSMUSG00000019907	108162193	108284475	protein phosphatase 1, regulatory subunit 12A [Source:MGI Symbol;Acc:MGI:1309528]	Ppp1r12a	protein_coding	1	yellow	-0.0646211	0.841854	-0.0486266	0.880709	0.476679	0.11716	-0.70041	0.0111891	-0.488151	0.107374	0.52966	0.0765482	-0.880279	0.000157914	-0.190746	0.552625	0.725976	0.00751349	0.774369	0.00310847	-0.719231	0.00837897	0.953854	1.52482e-06	0.356182	0.255798	0.631369	0.0276712	-0.740709	0.00585705	0.627994	0.0287729	0.697377	0.0117004	0.760023	0.00412112	-0.509181	0.0908799	-0.221373	0.489277
ENSMUSG00000026158	23366424	23397772	opioid growth factor receptor-like 1 [Source:MGI Symbol;Acc:MGI:1917405]	Ogfrl1	protein_coding	-1	yellow	0.0468793	0.88497	0.00105888	0.997394	-0.0424041	0.895896	-0.328555	0.297085	-0.23313	0.465875	0.21701	0.498095	-0.663331	0.0186948	-0.488417	0.107154	0.607689	0.036079	0.518618	0.0840681	-0.569068	0.0534749	0.615812	0.0330133	0.476175	0.117603	0.378071	0.22561	-0.636134	0.0261677	0.407074	0.189066	0.400657	0.196813	0.43357	0.159102	-0.333073	0.290091	-0.0537233	0.868298
ENSMUSG00000020155	33963013	33973641	potassium large conductance calcium-activated channel, subfamily M, beta member 1 [Source:MGI Symbol;Acc:MGI:1334203]	Kcnmb1	protein_coding	1	yellow	-0.118698	0.713311	-0.127986	0.691812	0.279868	0.378306	-0.586682	0.0449408	-0.472546	0.120824	0.434689	0.157908	-0.736755	0.0062715	-0.228533	0.474963	0.629966	0.0281253	0.537252	0.0716535	-0.234184	0.463804	0.780434	0.00274264	0.309078	0.328303	0.339044	0.280993	-0.607595	0.0361156	0.551333	0.0631527	0.251497	0.430395	0.34731	0.26867	-0.512448	0.0884807	0.373885	0.23121
ENSMUSG00000074238	127807007	127837523	adaptor-related protein complex 1 associated regulatory protein [Source:MGI Symbol;Acc:MGI:2384822]	Ap1ar	protein_coding	-1	yellow	0.147412	0.647535	0.192127	0.549699	0.522787	0.0811723	-0.334487	0.287923	-0.181495	0.572397	0.541604	0.0689472	-0.543484	0.0678001	0.00261617	0.993562	0.658481	0.0198957	0.716319	0.00877486	-0.467198	0.125676	0.721562	0.00807191	0.205517	0.521658	0.577031	0.0494878	-0.67149	0.0167952	0.557596	0.0596069	0.471213	0.122022	0.731113	0.00690062	-0.534494	0.0734061	-0.176127	0.583997
ENSMUSG00000024548	78750380	79109391	SET binding protein 1 [Source:MGI Symbol;Acc:MGI:1933199]	Setbp1	protein_coding	-1	yellow	-0.0592332	0.854911	-0.250449	0.432382	0.267873	0.399915	-0.562932	0.0566972	-0.5229	0.0810951	0.552224	0.0626395	-0.881669	0.000149315	-0.316464	0.316261	0.73953	0.00597843	0.703078	0.0107535	-0.557439	0.0596939	0.888434	0.000112564	0.400594	0.19689	0.354029	0.258888	-0.516572	0.0855145	0.624102	0.0300824	0.562745	0.056797	0.619136	0.0318145	-0.331684	0.292232	0.197028	0.539363
ENSMUSG00000097119	45433598	45442544	RIKEN cDNA B230354K17 gene [Source:MGI Symbol;Acc:MGI:2443272]	B230354K17Rik	bidirectional_promoter_lncRNA	1	yellow	-0.373553	0.231657	-0.082937	0.797758	0.329195	0.296089	-0.394888	0.203941	-0.462941	0.129628	0.419487	0.174625	-0.36042	0.249777	0.363226	0.245839	0.162694	0.613419	0.130623	0.685747	-0.228667	0.474697	0.36358	0.245344	-0.276144	0.384949	0.195522	0.542531	0.199887	0.533372	0.487666	0.107777	0.253195	0.427183	0.466711	0.126125	-0.126797	0.694555	-0.202066	0.528823
ENSMUSG00000024140	86753700	86833410	endothelial PAS domain protein 1 [Source:MGI Symbol;Acc:MGI:109169]	Epas1	protein_coding	1	yellow	0.255651	0.422558	-0.355885	0.256222	-0.0235703	0.942038	-0.351195	0.262989	-0.222236	0.487543	0.116889	0.71752	-0.708253	0.00994434	-0.727037	0.0073836	0.669963	0.0171395	0.69565	0.0119989	-0.804879	0.00158875	0.692743	0.0125145	0.789742	0.00224614	0.359459	0.251135	-0.584126	0.0461153	0.148018	0.646171	0.77229	0.00324205	0.536319	0.0722435	0.0553183	0.864419	-0.0546714	0.865992
ENSMUSG00000028863	125085134	125113238	MYST/Esa1-associated factor 6 [Source:MGI Symbol;Acc:MGI:1917338]	Meaf6	protein_coding	1	yellow	-0.30373	0.337175	-0.0653233	0.840155	0.386664	0.214373	-0.603914	0.0375706	-0.484412	0.110502	0.189473	0.555329	-0.526131	0.0788995	-0.0164779	0.959464	0.285994	0.367508	0.225499	0.481005	-0.053598	0.868603	0.555834	0.0605902	0.110423	0.732626	0.112573	0.727593	-0.406371	0.189907	0.264849	0.40546	0.0344709	0.915303	0.00740748	0.981772	-0.356993	0.254638	0.192411	0.549096
ENSMUSG00000047766	60568859	60688158	leucine rich repeat containing 49 [Source:MGI Symbol;Acc:MGI:2442689]	Lrrc49	protein_coding	-1	yellow	-0.509543	0.0906116	0.123129	0.70303	0.49418	0.102457	-0.741303	0.00579668	-0.524144	0.0802449	0.336075	0.285496	-0.57998	0.0480654	0.280657	0.376907	0.529766	0.0764783	0.200784	0.531499	-0.0923517	0.775293	0.672699	0.0165265	-0.141149	0.661705	0.339976	0.279588	-0.343354	0.274528	0.682046	0.0145531	0.0709664	0.826524	0.384118	0.217666	-0.613621	0.0338211	-0.0440156	0.89196
ENSMUSG00000037742	78478449	78489151	eukaryotic translation elongation factor 1 alpha 1 [Source:MGI Symbol;Acc:MGI:1096881]	Eef1a1	protein_coding	-1	yellow	0.162662	0.613489	0.0302238	0.925712	0.482397	0.112212	-0.529709	0.0765159	0.177436	0.58116	0.317741	0.314204	-0.208051	0.516422	0.109091	0.735748	0.67714	0.0155658	0.421582	0.172257	0.00819828	0.979826	0.488572	0.107026	0.111325	0.730514	0.301752	0.340488	-0.4238	0.169774	0.552979	0.0622071	0.332928	0.290315	0.502829	0.0956681	-0.467924	0.12501	0.113862	0.72458
ENSMUSG00000062866	13207717	13474412	phosphatase and actin regulator 2 [Source:MGI Symbol;Acc:MGI:2446138]	Phactr2	protein_coding	-1	yellow	0.0795238	0.805938	-0.346213	0.270287	-0.0900319	0.780814	-0.337465	0.283384	-0.269934	0.396159	0.124973	0.698765	-0.724336	0.00771741	-0.632862	0.0271934	0.82418	0.000976999	0.58607	0.0452202	-0.716554	0.00874248	0.703715	0.0106513	0.661961	0.0190284	0.324273	0.303801	-0.470543	0.122627	0.340608	0.278637	0.681364	0.0146908	0.612308	0.0343118	-0.0293554	0.927841	0.0296725	0.927064
ENSMUSG00000035901	109893780	109960470	DENN/MADD domain containing 5A [Source:MGI Symbol;Acc:MGI:1201681]	Dennd5a	protein_coding	-1	yellow	0.159572	0.620333	-0.14426	0.654652	0.36518	0.243117	-0.630198	0.0280498	-0.133861	0.678322	0.325385	0.302049	-0.635325	0.0264187	-0.274476	0.387944	0.714458	0.0090351	0.717961	0.00855001	-0.674539	0.0161234	0.794731	0.00201006	0.469191	0.123854	0.680836	0.0147983	-0.740027	0.00592705	0.465357	0.127376	0.773935	0.00313597	0.738918	0.00604214	-0.4445	0.14768	-0.251134	0.431083
ENSMUSG00000022000	75284373	75344426	zinc finger CCCH type containing 13 [Source:MGI Symbol;Acc:MGI:1914552]	Zc3h13	protein_coding	1	yellow	-0.026835	0.934024	0.440219	0.152089	0.650097	0.0221033	-0.342559	0.275714	-0.459284	0.133087	0.890649	0.000102215	-0.742964	0.0056302	0.149382	0.643102	0.430642	0.162255	0.766028	0.00367083	-0.481498	0.112981	0.775062	0.00306488	-0.0349804	0.914056	0.441838	0.150411	-0.713448	0.00917873	0.743843	0.00554351	0.297995	0.34683	0.605921	0.0367719	-0.717779	0.00857469	-0.209593	0.513247
ENSMUSG00000026131	33908225	34308661	dystonin [Source:MGI Symbol;Acc:MGI:104627]	Dst	protein_coding	1	yellow	0.224796	0.48241	-0.245847	0.441167	0.037365	0.908218	-0.323601	0.304862	-0.359207	0.251492	0.388719	0.211736	-0.766161	0.00366131	-0.598853	0.0396385	0.580426	0.047853	0.74778	0.00516777	-0.642235	0.0243304	0.734653	0.00650061	0.643241	0.0240369	0.402427	0.194657	-0.621148	0.0311044	0.309636	0.327385	0.568302	0.0538701	0.490565	0.105387	-0.16181	0.615373	0.177962	0.58002
ENSMUSG00000047139	43578284	43584265	CD24a antigen [Source:MGI Symbol;Acc:MGI:88323]	Cd24a	protein_coding	1	yellow	0.0540142	0.86759	-0.332134	0.291537	0.337826	0.282836	-0.699266	0.01138	-0.399715	0.197966	0.339323	0.280572	-0.749467	0.0050128	-0.374285	0.230671	0.716494	0.00875067	0.687894	0.0134104	-0.474652	0.118948	0.837194	0.000680723	0.531925	0.0750652	0.400902	0.196514	-0.589384	0.0437229	0.402326	0.19478	0.642973	0.0241147	0.529959	0.0763515	-0.223139	0.48573	0.189244	0.555816
ENSMUSG00000055319	128744943	128784836	Sec23 interacting protein [Source:MGI Symbol;Acc:MGI:2450915]	Sec23ip	protein_coding	1	yellow	-0.413729	0.181236	-0.0486014	0.880771	0.620912	0.0311871	-0.775238	0.00305387	-0.643598	0.0239333	0.574281	0.0508403	-0.731237	0.00688626	0.25752	0.419055	0.592147	0.0425016	0.45996	0.132444	-0.319506	0.311374	0.830999	0.000811475	-0.0760938	0.814176	0.453967	0.138222	-0.354468	0.258255	0.750766	0.00489582	0.395145	0.203621	0.635021	0.0265136	-0.546573	0.0659437	-0.0570998	0.86009
ENSMUSG00000040359	25248600	25281821	UFM1 specific ligase 1 [Source:MGI Symbol;Acc:MGI:1914740]	Ufl1	protein_coding	-1	yellow	-0.0708576	0.826786	0.250942	0.431446	0.786601	0.00240527	-0.605874	0.0367905	-0.270851	0.394494	0.597293	0.0402918	-0.595331	0.0411246	0.211122	0.510107	0.559551	0.0585292	0.626682	0.0292096	-0.39506	0.203728	0.753073	0.00469332	0.00515248	0.987321	0.351759	0.262169	-0.621772	0.0308865	0.637793	0.0256587	0.445121	0.147047	0.58919	0.0438098	-0.584681	0.0458586	-0.302198	0.339739
ENSMUSG00000021482	64275280	64312710	peroxiredoxin like 2C [Source:MGI Symbol;Acc:MGI:1913379]	Prxl2c	protein_coding	-1	yellow	0.206892	0.518813	-0.460529	0.131904	0.000906137	0.99777	-0.478193	0.115836	-0.101641	0.753281	0.0674801	0.83494	-0.633252	0.0270698	-0.632556	0.027291	0.866563	0.000265169	0.59998	0.0391712	-0.599446	0.039392	0.721316	0.00810392	0.746668	0.00527187	0.325486	0.30189	-0.494299	0.102362	0.291956	0.357156	0.709515	0.00975418	0.576375	0.0498079	-0.029255	0.928087	0.140769	0.662569
ENSMUSG00000029787	56714899	56761912	AVL9 cell migration associated [Source:MGI Symbol;Acc:MGI:1926187]	Avl9	protein_coding	1	yellow	0.0806723	0.803183	-0.0878796	0.785945	0.0605691	0.85167	-0.374945	0.229783	-0.388623	0.211859	0.410528	0.184976	-0.842982	0.000573885	-0.480889	0.113503	0.748178	0.00513088	0.741875	0.00573894	-0.85287	0.000421872	0.807946	0.00147586	0.533022	0.0743537	0.544761	0.0670283	-0.590135	0.0433885	0.529982	0.0763361	0.696839	0.0117928	0.788703	0.00229787	-0.234427	0.463327	-0.198093	0.537128
ENSMUSG00000026469	155275701	155417415	xenotropic and polytropic retrovirus receptor 1 [Source:MGI Symbol;Acc:MGI:97932]	Xpr1	protein_coding	-1	yellow	0.162432	0.613997	-0.327865	0.298162	0.153112	0.634733	-0.442442	0.149789	-0.387155	0.21374	0.366785	0.240894	-0.810918	0.00137247	-0.545941	0.0663208	0.683639	0.014235	0.774092	0.00312602	-0.746359	0.00530116	0.816539	0.00119217	0.641395	0.0245777	0.423029	0.170635	-0.588158	0.0442727	0.342356	0.276018	0.739396	0.00599232	0.620692	0.0312643	-0.113989	0.724284	0.0447068	0.890272
ENSMUSG00000028341	48045153	48086447	nuclear receptor subfamily 4, group A, member 3 [Source:MGI Symbol;Acc:MGI:1352457]	Nr4a3	protein_coding	1	yellow	0.244633	0.443496	-0.378821	0.224615	0.155758	0.628821	-0.552769	0.0623272	0.0618599	0.848541	0.0243888	0.940028	-0.329452	0.295689	-0.331219	0.29295	0.731286	0.00688063	0.463688	0.128929	-0.196237	0.541025	0.588598	0.0440749	0.552967	0.0622139	0.545763	0.0664273	-0.522235	0.0815521	0.255416	0.422999	0.483166	0.111557	0.479515	0.114688	-0.282537	0.373582	0.279885	0.378276
ENSMUSG00000020717	106654217	106750628	platelet/endothelial cell adhesion molecule 1 [Source:MGI Symbol;Acc:MGI:97537]	Pecam1	protein_coding	-1	yellow	-0.0782587	0.808974	0.00259581	0.993612	0.482785	0.111882	-0.671441	0.0168062	-0.49353	0.10298	0.502668	0.0957915	-0.869435	0.000239038	-0.214896	0.502394	0.573456	0.0512509	0.723476	0.007826	-0.671659	0.0167576	0.895973	8.03811e-05	0.343068	0.274955	0.488714	0.106909	-0.776886	0.00295241	0.525338	0.0794344	0.579858	0.0481238	0.548395	0.064866	-0.506423	0.0929387	-0.206908	0.51878
ENSMUSG00000087128	94460931	94477180	predicted gene 12655 [Source:MGI Symbol;Acc:MGI:3651648]	Gm12655	processed_transcript	-1	yellow	-0.170216	0.596876	-0.320857	0.309217	0.311909	0.323659	-0.591358	0.0428481	-0.529318	0.0767741	0.523111	0.0809506	-0.764528	0.00377965	-0.208312	0.515884	0.503337	0.095279	0.513961	0.0873848	-0.303575	0.337434	0.719958	0.00828232	0.235583	0.46106	0.0149465	0.963229	-0.335724	0.286032	0.522801	0.0811632	0.399241	0.198548	0.28926	0.361818	-0.243339	0.445988	0.366515	0.241268
ENSMUSG00000000708	53566861	53672720	K(lysine) acetyltransferase 2B [Source:MGI Symbol;Acc:MGI:1343094]	Kat2b	protein_coding	1	yellow	-0.493009	0.1034	0.121723	0.706286	0.376835	0.227254	-0.506392	0.0929622	-0.696938	0.0117758	0.472763	0.12063	-0.84645	0.000516412	0.0647139	0.841629	0.50518	0.0938765	0.408232	0.187689	-0.676502	0.0157012	0.754333	0.00458532	-0.0304382	0.925186	0.30008	0.343304	-0.344798	0.272382	0.665714	0.0181244	0.408837	0.186972	0.598895	0.0396209	-0.396052	0.202491	-0.442834	0.149386
ENSMUSG00000048264	9276528	9668928	disco interacting protein 2 homolog C [Source:MGI Symbol;Acc:MGI:1920179]	Dip2c	protein_coding	1	yellow	0.202937	0.527011	-0.23248	0.467156	0.0359197	0.911756	-0.295642	0.350836	-0.27261	0.391309	0.196583	0.540297	-0.723977	0.00776266	-0.619811	0.0315751	0.604282	0.0374231	0.708478	0.00991022	-0.864214	0.000288151	0.701005	0.0110909	0.68139	0.0146856	0.460791	0.131655	-0.640388	0.0248764	0.194546	0.544588	0.746023	0.00533302	0.582608	0.0468228	-0.0756093	0.815341	-0.195277	0.543047
ENSMUSG00000058997	78849052	79202310	von Willebrand factor A domain containing 8 [Source:MGI Symbol;Acc:MGI:1919008]	Vwa8	protein_coding	1	yellow	0.175089	0.58625	-0.43107	0.161791	-0.121077	0.707785	-0.289966	0.360595	-0.220851	0.490329	0.197821	0.537698	-0.718515	0.00847512	-0.712115	0.00937075	0.727442	0.00733457	0.621923	0.0308338	-0.675943	0.0158207	0.66221	0.0189675	0.700049	0.0112491	0.173149	0.590471	-0.460787	0.131658	0.293887	0.353837	0.671784	0.0167295	0.480421	0.113906	0.0135708	0.966611	0.188637	0.557108
ENSMUSG00000054640	81373105	81738377	solute carrier family 8 (sodium/calcium exchanger), member 1 [Source:MGI Symbol;Acc:MGI:107956]	Slc8a1	protein_coding	-1	yellow	-0.252666	0.428183	0.172343	0.592229	0.52723	0.0781622	-0.609514	0.0353731	-0.732212	0.00677449	0.724827	0.00765586	-0.936683	7.20231e-06	0.00893235	0.97802	0.512991	0.0880861	0.700552	0.0111658	-0.598784	0.0396672	0.925338	1.61041e-05	0.102084	0.752235	0.58279	0.0467374	-0.68377	0.014209	0.720083	0.00826571	0.40056	0.196932	0.632663	0.0272569	-0.649987	0.0221334	-0.178803	0.578203
ENSMUSG00000036769	23693051	23806025	WD repeat domain 44 [Source:MGI Symbol;Acc:MGI:1919654]	Wdr44	protein_coding	1	yellow	-0.151605	0.63811	-0.346026	0.270563	0.513056	0.0880393	-0.766722	0.00362131	-0.515928	0.0859733	0.532256	0.0748497	-0.804933	0.00158672	-0.144265	0.654643	0.624134	0.0300713	0.626004	0.0294369	-0.396275	0.202214	0.858815	0.00034687	0.27261	0.391309	0.204151	0.52449	-0.480045	0.11423	0.559785	0.0584011	0.582704	0.0467776	0.451392	0.140755	-0.344004	0.273561	0.228828	0.474376
ENSMUSG00000053931	121426497	121458207	calponin 3, acidic [Source:MGI Symbol;Acc:MGI:1919244]	Cnn3	protein_coding	1	yellow	0.140942	0.662174	-0.265724	0.403852	0.378044	0.225646	-0.625994	0.0294404	-0.284749	0.36969	0.243992	0.444731	-0.596624	0.0405744	-0.310972	0.325192	0.567966	0.0540438	0.650176	0.0220816	-0.451563	0.140585	0.743801	0.00554764	0.517818	0.0846318	0.538101	0.0711201	-0.657853	0.0200551	0.236894	0.458496	0.599072	0.0395474	0.47466	0.118941	-0.271163	0.393927	0.0600261	0.852987
ENSMUSG00000020783	73047783	73089317	nuclear cap binding subunit 3 [Source:MGI Symbol;Acc:MGI:1914124]	Ncbp3	protein_coding	1	yellow	-0.0122375	0.96989	0.320085	0.310448	0.628734	0.0285285	-0.395979	0.202582	-0.246464	0.439983	0.72067	0.00818841	-0.600853	0.0388119	0.155961	0.628368	0.513857	0.0874596	0.636749	0.0259783	-0.310761	0.325537	0.718151	0.00852425	-0.0135539	0.966653	0.354301	0.258496	-0.687118	0.0135581	0.711299	0.00948984	0.239562	0.453298	0.505814	0.0933975	-0.757512	0.00432136	-0.0779309	0.809761
ENSMUSG00000046743	38886940	39011985	FAT atypical cadherin 4 [Source:MGI Symbol;Acc:MGI:3045256]	Fat4	protein_coding	1	yellow	0.128855	0.689812	0.00588213	0.985525	-0.0688149	0.831716	-0.097173	0.763849	-0.497793	0.0995832	0.388414	0.212126	-0.711904	0.00940151	-0.529709	0.0765162	0.30913	0.328217	0.638759	0.0253653	-0.616402	0.0327984	0.568137	0.0539551	0.484446	0.110473	0.4342	0.158429	-0.603607	0.0376936	0.211433	0.509469	0.348917	0.266311	0.354369	0.258399	-0.182606	0.570008	0.0530134	0.870025
ENSMUSG00000083325	150499466	150500845	predicted gene 14121 [Source:MGI Symbol;Acc:MGI:3651769]	Gm14121	transcribed_processed_pseudogene	-1	yellow	0.107521	0.739433	-0.278748	0.380298	0.273202	0.390239	-0.628556	0.0285873	-0.029881	0.926552	0.0503838	0.876427	-0.41658	0.177943	-0.316423	0.316328	0.598022	0.0399854	0.465157	0.127562	-0.291109	0.358618	0.574747	0.0506089	0.456604	0.13566	0.406116	0.190211	-0.669425	0.017262	0.231489	0.46911	0.555241	0.0609238	0.326589	0.300158	-0.358931	0.251882	0.0893201	0.78251
ENSMUSG00000039031	26753421	26918648	Rho GTPase activating protein 18 [Source:MGI Symbol;Acc:MGI:1921160]	Arhgap18	protein_coding	1	yellow	-0.15367	0.633484	-0.0816544	0.800829	0.284741	0.369704	-0.655224	0.0207332	-0.46266	0.129892	0.456527	0.135734	-0.851808	0.000436493	-0.234819	0.462556	0.844879	0.000541868	0.620251	0.0314196	-0.537298	0.0716248	0.890742	0.000101798	0.333221	0.289864	0.438754	0.153617	-0.572457	0.0517512	0.726182	0.00748812	0.516371	0.0856577	0.684847	0.0139972	-0.45621	0.136041	0.0185096	0.95447
ENSMUSG00000034663	96997689	97091867	BMP2 inducible kinase [Source:MGI Symbol;Acc:MGI:2155456]	Bmp2k	protein_coding	1	yellow	0.362654	0.246638	-0.295497	0.351084	0.22788	0.47626	-0.512654	0.0883312	-0.122693	0.704038	0.359334	0.251312	-0.63279	0.0272164	-0.498135	0.0993138	0.585302	0.0455723	0.80319	0.00165367	-0.675092	0.0160036	0.722504	0.00795023	0.642754	0.0241787	0.523286	0.0808309	-0.673628	0.0163221	0.290929	0.358928	0.807095	0.00150655	0.604679	0.0372649	-0.19124	0.551577	-0.0288085	0.929182
ENSMUSG00000048249	26715650	26776635	CREB3 regulatory factor [Source:MGI Symbol;Acc:MGI:1924378]	Crebrf	protein_coding	1	yellow	0.0124545	0.969357	-0.375945	0.228443	0.27254	0.391435	-0.683063	0.0143494	-0.218667	0.494738	0.274933	0.387123	-0.732876	0.00669913	-0.420098	0.173933	0.764128	0.00380906	0.576133	0.0499263	-0.44556	0.146601	0.80114	0.00173518	0.518336	0.0842666	0.130019	0.687134	-0.570715	0.0526322	0.459901	0.132499	0.571946	0.0520087	0.381976	0.22046	-0.286835	0.366038	0.225069	0.481864
ENSMUSG00000028397	74242497	74405860	lysine (K)-specific demethylase 4C [Source:MGI Symbol;Acc:MGI:1924054]	Kdm4c	protein_coding	1	yellow	-0.220099	0.491845	-0.175149	0.586119	0.248095	0.436864	-0.512259	0.0886186	-0.641513	0.0245429	0.557485	0.0596685	-0.86659	0.000264913	-0.180351	0.574862	0.730915	0.00692343	0.606395	0.0365851	-0.532545	0.0746625	0.842747	0.000577957	0.242094	0.448392	0.377359	0.226557	-0.380435	0.222484	0.692143	0.0126229	0.505418	0.0936968	0.68756	0.013474	-0.319048	0.312108	0.120413	0.709327
ENSMUSG00000032757	4076899	4086972	Bet1 golgi vesicular membrane trafficking protein [Source:MGI Symbol;Acc:MGI:1343104]	Bet1	protein_coding	-1	yellow	-0.463353	0.129242	0.0472447	0.884079	0.475873	0.117869	-0.692683	0.0125253	-0.362255	0.247197	0.163655	0.611296	-0.297637	0.347439	0.410887	0.184555	0.431972	0.160818	0.0679231	0.833869	-0.00121124	0.997019	0.458448	0.133886	-0.233543	0.465064	0.440862	0.151421	-0.167389	0.603072	0.529692	0.0765272	0.171969	0.593044	0.436947	0.155515	-0.474701	0.118905	-0.165649	0.6069
ENSMUSG00000072704	133104909	133110899	small integral membrane protein 10 like 1 [Source:MGI Symbol;Acc:MGI:1914379]	Smim10l1	protein_coding	1	yellow	-0.37173	0.234124	0.106743	0.741263	0.507732	0.0919574	-0.739539	0.00597746	-0.652284	0.0215111	0.61836	0.0320915	-0.900595	6.45585e-05	0.0664304	0.837477	0.714573	0.00901883	0.571841	0.0520616	-0.496826	0.100347	0.93122	1.07921e-05	0.0544456	0.866541	0.479542	0.114665	-0.550312	0.0637446	0.856081	0.00037994	0.398955	0.1989	0.688534	0.0132896	-0.635942	0.0262272	-0.139609	0.665204
ENSMUSG00000057614	18265135	18360355	guanine nucleotide binding protein (G protein), alpha inhibiting 1 [Source:MGI Symbol;Acc:MGI:95771]	Gnai1	protein_coding	-1	yellow	0.281828	0.374834	-0.206132	0.520385	0.0756908	0.815145	-0.43197	0.16082	-0.190357	0.553451	0.259929	0.414562	-0.749031	0.00505255	-0.643442	0.0239784	0.686104	0.0137529	0.768289	0.0035113	-0.804085	0.00161902	0.763051	0.00388917	0.73071	0.00694722	0.45813	0.134191	-0.7023	0.0108793	0.301299	0.34125	0.739806	0.00594984	0.600275	0.0390493	-0.144176	0.654842	-0.116285	0.718928
ENSMUSG00000097333	67515781	67526177	zinc finger protein 87 [Source:MGI Symbol;Acc:MGI:107768]	Zfp87	protein_coding	-1	yellow	0.0569509	0.860452	-0.148898	0.644189	0.0169744	0.958243	-0.416534	0.177996	-0.297859	0.347062	0.231635	0.468821	-0.744389	0.00549027	-0.489425	0.106322	0.824245	0.000975301	0.642363	0.0242931	-0.796941	0.00191175	0.742424	0.00568388	0.553444	0.061942	0.518828	0.0839205	-0.520062	0.0830573	0.475147	0.11851	0.736186	0.00633287	0.792338	0.00212079	-0.143498	0.656378	-0.222361	0.487292
ENSMUSG00000019986	20952547	21080429	Abelson helper integration site 1 [Source:MGI Symbol;Acc:MGI:87971]	Ahi1	protein_coding	1	yellow	0.40994	0.185668	-0.147569	0.647182	0.213488	0.505265	-0.450885	0.141257	0.101299	0.754089	0.190776	0.552562	-0.415673	0.178986	-0.393156	0.206112	0.461882	0.130624	0.648523	0.0225368	-0.576157	0.0499145	0.577092	0.0494577	0.577572	0.0492244	0.603597	0.0376977	-0.694305	0.0122355	0.182918	0.569336	0.642905	0.0241346	0.509466	0.0906685	-0.288953	0.362351	-0.197773	0.537799
ENSMUSG00000026393	138482875	138620141	NIMA (never in mitosis gene a)-related expressed kinase 7 [Source:MGI Symbol;Acc:MGI:1890645]	Nek7	protein_coding	-1	yellow	-0.513727	0.0875535	0.328661	0.29692	0.531468	0.0753625	-0.68214	0.0145343	-0.609337	0.0354413	0.54844	0.0648395	-0.707681	0.0100315	0.315158	0.318372	0.513168	0.0879584	0.336964	0.284145	-0.243976	0.444762	0.754003	0.0046134	-0.209813	0.512794	0.496934	0.100262	-0.518025	0.0844856	0.839849	0.000629966	0.0865817	0.789043	0.503577	0.0950957	-0.830011	0.000834011	-0.191174	0.551718
ENSMUSG00000019935	89574020	89621253	solute carrier family 17 (sodium-dependent inorganic phosphate cotransporter), member 8 [Source:MGI Symbol;Acc:MGI:3039629]	Slc17a8	protein_coding	-1	yellow	-0.382809	0.219371	-0.122348	0.704838	0.109843	0.733985	-0.415403	0.179297	-0.567182	0.0544515	0.176396	0.583414	-0.718141	0.00852563	-0.193857	0.546042	0.559086	0.0587839	0.288778	0.362656	-0.588756	0.0440038	0.606257	0.0366396	0.192908	0.548045	0.0854086	0.791846	-0.146523	0.64954	0.425202	0.168216	0.421282	0.172596	0.467447	0.125448	-0.0114541	0.971817	-0.230157	0.471743
ENSMUSG00000021636	100595957	100616971	MARVEL (membrane-associating) domain containing 2 [Source:MGI Symbol;Acc:MGI:2446166]	Marveld2	protein_coding	-1	yellow	0.15549	0.629418	-0.175319	0.585751	0.356697	0.255061	-0.692598	0.0125406	-0.180265	0.575047	0.268656	0.398487	-0.688942	0.013213	-0.389557	0.210667	0.7346	0.00650647	0.709135	0.00981124	-0.55619	0.0603904	0.833191	0.000763188	0.572181	0.0518903	0.541981	0.0687158	-0.814444	0.00125711	0.400194	0.197379	0.650489	0.0219963	0.549081	0.0644631	-0.425522	0.167861	-0.0330763	0.91872
ENSMUSG00000035992	54438199	54518235	folliculin interacting protein 1 [Source:MGI Symbol;Acc:MGI:2444668]	Fnip1	protein_coding	1	yellow	-0.0089162	0.97806	-0.310169	0.326509	0.446444	0.145704	-0.727821	0.00728878	-0.092247	0.775542	0.325333	0.302129	-0.532025	0.0749999	-0.0419165	0.897087	0.714504	0.00902859	0.510368	0.0900032	-0.47438	0.119189	0.727414	0.00733796	0.258827	0.416616	0.390307	0.209712	-0.36595	0.242048	0.565123	0.0555314	0.703177	0.0107376	0.68861	0.0132753	-0.333536	0.289381	-0.143703	0.655914
ENSMUSG00000032396	64306756	64341288	DIS3 like exosome 3'-5' exoribonuclease [Source:MGI Symbol;Acc:MGI:2143272]	Dis3l	protein_coding	-1	yellow	0.14741	0.64754	-0.105099	0.745129	0.461255	0.131216	-0.754922	0.00453553	-0.202605	0.527702	0.432767	0.159962	-0.68687	0.0136057	-0.225828	0.480349	0.704499	0.0105266	0.738996	0.00603407	-0.513347	0.0878282	0.863419	0.000296268	0.447064	0.145078	0.618465	0.032054	-0.75837	0.00425217	0.539872	0.070016	0.626833	0.029159	0.646741	0.0230348	-0.513558	0.0876757	-0.0579611	0.857998
ENSMUSG00000011382	45470987	45488805	dihydrodiol dehydrogenase (dimeric) [Source:MGI Symbol;Acc:MGI:1919005]	Dhdh	protein_coding	-1	yellow	0.112354	0.728105	-0.0256791	0.936861	0.251349	0.430676	-0.630841	0.0278413	-0.0317747	0.92191	0.134255	0.67742	-0.516549	0.0855305	-0.266653	0.402148	0.631972	0.0274775	0.503001	0.0955362	-0.561691	0.0573644	0.645104	0.0234998	0.437499	0.154933	0.48675	0.108539	-0.563544	0.0563699	0.391129	0.20867	0.573247	0.0513551	0.579311	0.0483854	-0.289337	0.361685	-0.345204	0.27178
ENSMUSG00000027680	34019943	34070322	fragile X mental retardation gene 1, autosomal homolog [Source:MGI Symbol;Acc:MGI:104860]	Fxr1	protein_coding	1	yellow	-0.439543	0.152793	0.169699	0.598007	0.616864	0.0326307	-0.757647	0.00431047	-0.600748	0.0388547	0.6272	0.0290365	-0.710154	0.0096589	0.350894	0.263426	0.614054	0.0336604	0.461772	0.130728	-0.349357	0.265667	0.812781	0.00131052	-0.185659	0.563462	0.627166	0.0290479	-0.452323	0.139836	0.890151	0.000104476	0.373559	0.231648	0.751452	0.00483492	-0.741057	0.00582162	-0.238125	0.456094
ENSMUSG00000064361	9808	9875	mitochondrially encoded tRNA arginine [Source:MGI Symbol;Acc:MGI:102476]	mt-Tr	Mt_tRNA	1	yellow	0.103154	0.749711	-0.214075	0.504067	0.238984	0.454422	-0.516727	0.0854043	-0.0789206	0.807385	0.101727	0.753079	-0.407124	0.189007	-0.225384	0.481235	0.634146	0.0267877	0.438957	0.153404	-0.215847	0.500457	0.623198	0.0303925	0.425057	0.168377	0.540629	0.0695474	-0.599794	0.039248	0.294135	0.353412	0.34329	0.274624	0.404803	0.191787	-0.435532	0.157012	0.186537	0.561585
ENSMUSG00000057649	73937811	73960895	bromodomain containing 9 [Source:MGI Symbol;Acc:MGI:2145317]	Brd9	protein_coding	1	yellow	0.246623	0.439679	-0.402521	0.194544	0.151169	0.639088	-0.574026	0.0509667	-0.0576609	0.858727	0.0842799	0.794544	-0.625117	0.0297368	-0.614592	0.0334613	0.763845	0.00382995	0.64325	0.0240341	-0.554377	0.0614115	0.73568	0.00638789	0.746315	0.00530532	0.319782	0.310934	-0.693109	0.0124486	0.226286	0.479434	0.692717	0.0125192	0.42675	0.166506	-0.169615	0.59819	0.126236	0.695849
ENSMUSG00000022139	120275669	120431697	muscleblind like splicing factor 2 [Source:MGI Symbol;Acc:MGI:2145597]	Mbnl2	protein_coding	1	yellow	-0.252797	0.427935	-0.0162523	0.960018	0.488566	0.107031	-0.682355	0.0144911	-0.609008	0.0355678	0.630133	0.0280709	-0.891241	9.95841e-05	-0.0178934	0.955984	0.759109	0.00419323	0.681589	0.0146455	-0.587209	0.0447015	0.945252	3.53229e-06	0.150142	0.641393	0.583992	0.0461772	-0.609001	0.0355707	0.802093	0.00169693	0.577246	0.049383	0.787348	0.00236666	-0.602396	0.0381825	-0.112033	0.728857
ENSMUSG00000041058	19608303	19708993	WW domain containing E3 ubiquitin protein ligase 1 [Source:MGI Symbol;Acc:MGI:1861728]	Wwp1	protein_coding	-1	yellow	0.213375	0.505495	-0.398379	0.19961	0.21318	0.505895	-0.608594	0.0357278	-0.197126	0.539157	0.315362	0.318042	-0.746264	0.00531012	-0.526647	0.078553	0.871159	0.000224341	0.780958	0.00271265	-0.664658	0.0183756	0.851856	0.000435829	0.671059	0.016892	0.465953	0.126824	-0.648894	0.022434	0.445463	0.1467	0.840936	0.000610043	0.702314	0.0108769	-0.214867	0.502452	0.0933222	0.772986
ENSMUSG00000027620	156147239	156180238	RNA binding motif protein 39 [Source:MGI Symbol;Acc:MGI:2157953]	Rbm39	protein_coding	-1	yellow	0.0899035	0.78112	-0.215566	0.50103	0.205251	0.522209	-0.515319	0.0864088	-0.235921	0.460398	0.351972	0.26186	-0.670853	0.0169383	-0.339141	0.280846	0.715678	0.00886383	0.681161	0.0147321	-0.722524	0.00794757	0.717062	0.00867257	0.434089	0.158547	0.523104	0.0809549	-0.537393	0.071565	0.493273	0.103187	0.835615	0.000712376	0.769946	0.00339783	-0.238003	0.456331	-0.205257	0.522196
ENSMUSG00000057147	114516416	114654964	diphthamine biosynthesis 6 [Source:MGI Symbol;Acc:MGI:1913882]	Dph6	protein_coding	-1	yellow	-0.459572	0.132813	0.169232	0.599029	0.54188	0.0687779	-0.638537	0.0254325	-0.540134	0.0698532	0.411548	0.183779	-0.662968	0.0187827	0.219398	0.493261	0.489752	0.106053	0.345134	0.271883	-0.31618	0.31672	0.726239	0.00748115	-0.105709	0.743694	0.456871	0.135403	-0.57662	0.049688	0.646439	0.0231201	0.217161	0.497788	0.430827	0.162054	-0.747568	0.00518747	-0.21134	0.50966
ENSMUSG00000030201	134446476	134566965	low density lipoprotein receptor-related protein 6 [Source:MGI Symbol;Acc:MGI:1298218]	Lrp6	protein_coding	-1	yellow	-0.247329	0.438327	0.0677018	0.834404	0.285871	0.367724	-0.419443	0.174675	-0.69479	0.0121498	0.721617	0.00806477	-0.871359	0.000222686	-0.0697171	0.829538	0.50009	0.0977843	0.607628	0.0361025	-0.521154	0.0822988	0.780632	0.00273128	0.0758584	0.814742	0.399344	0.198423	-0.465502	0.127242	0.734778	0.00648686	0.349661	0.265224	0.585638	0.0454178	-0.498913	0.0987033	0.0175784	0.956759
ENSMUSG00000096020	115833950	115834418	immunoglobulin heavy variable 1-75 [Source:MGI Symbol;Acc:MGI:4439735]	Ighv1-75	IG_V_gene	-1	yellow	-0.109993	0.733633	-0.218341	0.495398	0.0621545	0.847827	-0.231605	0.468882	-0.340729	0.278456	0.206533	0.519555	-0.64873	0.0224794	-0.411919	0.183345	0.30654	0.332497	0.38467	0.21695	-0.58442	0.0459791	0.504009	0.0947662	0.339856	0.279769	-0.0662361	0.837947	-0.405578	0.190855	0.184405	0.566147	0.402653	0.194384	0.123973	0.701076	-0.110446	0.732572	-0.0476504	0.88309
ENSMUSG00000032580	107740371	107770996	RNA binding motif protein 5 [Source:MGI Symbol;Acc:MGI:1933204]	Rbm5	protein_coding	-1	yellow	0.0833855	0.796684	-0.183803	0.567439	0.348763	0.266537	-0.639442	0.0251597	-0.378572	0.224945	0.463577	0.129033	-0.828767	0.000863078	-0.379974	0.223091	0.756835	0.00437657	0.799868	0.00178731	-0.620756	0.0312418	0.90194	6.04462e-05	0.511773	0.0889729	0.546733	0.0658488	-0.786143	0.00242919	0.528267	0.0774709	0.692804	0.0125035	0.641586	0.0245215	-0.441787	0.150464	0.0483059	0.881491
ENSMUSG00000113619	42302298	42304991	predicted gene, 47118 [Source:MGI Symbol;Acc:MGI:6095863]	Gm47118	antisense	-1	yellow	-0.330988	0.293308	0.0930849	0.77355	0.275474	0.386152	-0.225807	0.480391	-0.70315	0.0107418	0.525194	0.0795321	-0.681997	0.014563	0.000647093	0.998408	-0.0305633	0.924879	0.329222	0.296047	-0.430243	0.162687	0.485573	0.109524	-0.0547752	0.865739	0.0231022	0.943187	-0.253886	0.42588	0.308197	0.329756	0.0917431	0.776741	0.0901753	0.780473	-0.243588	0.445508	-0.117296	0.716571
ENSMUSG00000030287	146108299	146502223	inositol 1,4,5-triphosphate receptor 2 [Source:MGI Symbol;Acc:MGI:99418]	Itpr2	protein_coding	-1	yellow	0.200343	0.532419	-0.145555	0.651727	0.219382	0.493293	-0.491929	0.104275	-0.311572	0.324209	0.498477	0.0990453	-0.778639	0.0028473	-0.435031	0.157544	0.5912	0.0429176	0.793429	0.00206974	-0.722365	0.00796807	0.782419	0.00263036	0.524853	0.0797632	0.462592	0.129956	-0.627391	0.028973	0.458303	0.134026	0.699802	0.0112903	0.636554	0.0260381	-0.247178	0.438617	-0.0775456	0.810687
ENSMUSG00000038780	144876495	144965847	SMAD specific E3 ubiquitin protein ligase 1 [Source:MGI Symbol;Acc:MGI:1923038]	Smurf1	protein_coding	-1	yellow	0.116713	0.717929	0.29184	0.357358	0.357099	0.254488	-0.161751	0.615503	-0.0691932	0.830802	0.529064	0.0769421	-0.427004	0.166226	-0.00508206	0.987494	0.45951	0.132872	0.539198	0.0704346	-0.23244	0.467234	0.527591	0.0779212	0.0833403	0.796792	0.362846	0.246369	-0.687294	0.0135245	0.537428	0.0715427	0.14881	0.644387	0.38831	0.21226	-0.695051	0.0121039	0.029864	0.926594
ENSMUSG00000080720	5092547	5093201	predicted gene 16077 [Source:MGI Symbol;Acc:MGI:3802018]	Gm16077	processed_pseudogene	1	yellow	0.368036	0.239171	-0.246355	0.440191	0.0825676	0.798642	-0.35828	0.252806	0.0543817	0.866696	0.288577	0.363005	-0.47274	0.120651	-0.429675	0.163304	0.587881	0.0443973	0.645647	0.0233447	-0.53352	0.0740325	0.597459	0.0402219	0.556471	0.0602332	0.515344	0.0863904	-0.572185	0.0518881	0.33489	0.287305	0.613776	0.0337636	0.574002	0.0509789	-0.279087	0.379695	0.0315509	0.922458
ENSMUSG00000034867	35586244	35639226	ankyrin repeat domain 27 (VPS9 domain) [Source:MGI Symbol;Acc:MGI:2444103]	Ankrd27	protein_coding	1	yellow	-0.315559	0.317724	0.118259	0.714331	0.332885	0.290382	-0.550257	0.0637764	-0.68821	0.0133506	0.610365	0.0350474	-0.834264	0.000740355	0.0340263	0.916393	0.631942	0.0274871	0.546787	0.0658165	-0.542325	0.0685054	0.81046	0.00138802	0.0520001	0.872491	0.521371	0.0821482	-0.359332	0.251314	0.788794	0.00229331	0.402259	0.194862	0.771884	0.00326859	-0.425307	0.168099	-0.179692	0.576283
ENSMUSG00000064358	8607	9390	mitochondrially encoded cytochrome c oxidase III [Source:MGI Symbol;Acc:MGI:102502]	mt-Co3	protein_coding	1	yellow	-0.390942	0.208907	-0.13711	0.670896	0.545866	0.0663654	-0.790312	0.00221814	-0.665953	0.018068	0.634758	0.0265958	-0.881351	0.000151253	0.0691082	0.831007	0.709093	0.00981741	0.542352	0.068489	-0.388049	0.212594	0.913043	3.37884e-05	0.0473117	0.883916	0.261289	0.412037	-0.389372	0.210904	0.821554	0.00104725	0.45247	0.139692	0.598519	0.0397779	-0.492413	0.103883	0.0922747	0.775476
ENSMUSG00000031171	8238668	8252406	FtsJ RNA methyltransferase homolog 1 (E. coli) [Source:MGI Symbol;Acc:MGI:1859648]	Ftsj1	protein_coding	-1	yellow	-0.302178	0.339774	-0.149972	0.641774	0.401429	0.195871	-0.794379	0.00202604	-0.199337	0.534522	0.091801	0.776603	-0.479889	0.114365	-0.00579218	0.985746	0.616045	0.0329285	0.201948	0.529071	-0.105931	0.743171	0.600995	0.0387534	0.127573	0.692765	0.104477	0.746593	-0.404637	0.191986	0.48027	0.114036	0.272854	0.390868	0.225835	0.480334	-0.431139	0.161716	0.0590445	0.855368
ENSMUSG00000101111	24613189	24613971	predicted gene 28437 [Source:MGI Symbol;Acc:MGI:5579143]	Gm28437	unprocessed_pseudogene	-1	yellow	-0.392026	0.207536	-0.136577	0.672114	0.546494	0.065991	-0.790695	0.00219948	-0.666212	0.018007	0.634675	0.0266216	-0.880868	0.000154226	0.0704416	0.82779	0.70877	0.0098661	0.541389	0.0690793	-0.386692	0.214337	0.912711	3.44194e-05	0.0460223	0.887061	0.260913	0.412734	-0.388972	0.211413	0.821911	0.00103748	0.451306	0.14084	0.59785	0.0400579	-0.493158	0.103279	0.0925792	0.774752
ENSMUSG00000033949	46165300	46212607	tripartite motif-containing 36 [Source:MGI Symbol;Acc:MGI:106264]	Trim36	protein_coding	-1	yellow	0.326973	0.299557	-0.340298	0.279104	-0.035734	0.91221	-0.334113	0.288495	-0.0643161	0.842592	0.1452	0.652528	-0.550846	0.0634345	-0.583705	0.0463108	0.752884	0.00470964	0.63747	0.025757	-0.565158	0.0555126	0.663001	0.0187747	0.716209	0.00879011	0.508566	0.0913358	-0.529188	0.07686	0.267596	0.400422	0.611007	0.034803	0.612726	0.0341552	-0.108873	0.73626	0.138393	0.667971
ENSMUSG00000022337	43477229	43527763	ER membrane protein complex subunit 2 [Source:MGI Symbol;Acc:MGI:1913986]	Emc2	protein_coding	1	yellow	-0.746117	0.00532409	-0.0345295	0.91516	0.435485	0.157062	-0.649748	0.0221987	-0.635156	0.0264715	0.37526	0.229361	-0.551759	0.062907	0.429859	0.163104	0.459337	0.133037	-0.002766	0.993193	-0.0136514	0.966413	0.551068	0.0633061	-0.374255	0.230711	-0.026554	0.934714	0.0911547	0.778141	0.749182	0.0050387	0.0253449	0.937681	0.323545	0.304949	-0.393309	0.20592	0.0380885	0.906448
ENSMUSG00000050890	134275002	134287895	PDLIM1 interacting kinase 1 like [Source:MGI Symbol;Acc:MGI:2385213]	Pdik1l	protein_coding	-1	yellow	0.188464	0.557477	0.000513762	0.998736	0.45117	0.140975	-0.294307	0.353118	-0.0924211	0.775128	0.45109	0.141054	-0.454184	0.13801	-0.0291541	0.928335	0.635435	0.0263845	0.662818	0.0188191	-0.533033	0.0743462	0.625747	0.0295238	0.232325	0.467461	0.472417	0.12094	-0.456829	0.135443	0.462289	0.130241	0.635243	0.0264441	0.774305	0.00311247	-0.286737	0.36621	-0.23446	0.463262
ENSMUSG00000021417	34977748	35027096	enoyl-Coenzyme A delta isomerase 2 [Source:MGI Symbol;Acc:MGI:1346064]	Eci2	protein_coding	-1	yellow	-0.0391016	0.903969	0.311086	0.325004	0.373084	0.23229	-0.292207	0.356725	-0.108317	0.737564	0.400647	0.196825	-0.412002	0.183248	0.0858019	0.790906	0.442262	0.149974	0.360167	0.250134	-0.230408	0.471246	0.483999	0.110851	0.0123505	0.969612	0.135808	0.673868	-0.380508	0.222388	0.530806	0.0757953	0.102387	0.75152	0.368109	0.23907	-0.424918	0.168531	-0.16353	0.611571
ENSMUSG00000084098	23235236	23235739	predicted gene 13422 [Source:MGI Symbol;Acc:MGI:3650167]	Gm13422	processed_pseudogene	1	yellow	-0.454144	0.13805	-0.119067	0.712452	0.603579	0.0377048	-0.774672	0.00308932	-0.666763	0.0178776	0.640301	0.0249025	-0.784595	0.00251133	0.20801	0.516505	0.582686	0.0467861	0.432422	0.160333	-0.181477	0.572435	0.841065	0.000607722	-0.0855678	0.791465	0.20807	0.516382	-0.351542	0.262484	0.791931	0.00214009	0.263162	0.40857	0.436685	0.155791	-0.589358	0.0437344	0.223984	0.484035
ENSMUSG00000026737	18842255	18998126	phosphatidylinositol-5-phosphate 4-kinase, type II, alpha [Source:MGI Symbol;Acc:MGI:1298206]	Pip4k2a	protein_coding	-1	yellow	-0.394424	0.204522	0.314274	0.319807	0.564436	0.0558948	-0.690888	0.0128519	-0.446345	0.145805	0.488121	0.107399	-0.533706	0.0739126	0.327962	0.298011	0.29692	0.348657	0.277599	0.382347	-0.0896495	0.781725	0.597631	0.0401498	-0.224374	0.483255	0.402301	0.194811	-0.529533	0.0766322	0.66854	0.017465	0.0305405	0.924935	0.278684	0.380413	-0.803146	0.00165541	-0.137927	0.669035
ENSMUSG00000021592	76060422	76098660	arylsulfatase K [Source:MGI Symbol;Acc:MGI:1924291]	Arsk	protein_coding	-1	yellow	-0.0361121	0.911285	-0.573767	0.051096	0.32212	0.307208	-0.739823	0.0059481	-0.148109	0.645965	0.255082	0.423627	-0.498298	0.0991858	-0.201671	0.529647	0.613212	0.0339735	0.361142	0.24876	-0.0820139	0.799968	0.615993	0.0329472	0.327097	0.299363	-0.119294	0.711926	-0.178789	0.578233	0.412959	0.182131	0.441901	0.150347	0.219111	0.493841	-0.107155	0.740293	0.497254	0.100008
ENSMUSG00000114576	100264745	100278817	NLR family, apoptosis inhibitory protein 3, pseudogene 1 [Source:MGI Symbol;Acc:MGI:1858253]	Naip3-ps1	unprocessed_pseudogene	-1	yellow	0.163097	0.612527	0.0322219	0.920814	0.33556	0.286282	-0.328159	0.297703	-0.210579	0.51122	0.577896	0.0490676	-0.641089	0.0246684	-0.240369	0.451732	0.610144	0.0351319	0.696846	0.0117916	-0.440592	0.151701	0.658965	0.0197733	0.304729	0.335508	0.128045	0.691676	-0.510824	0.0896678	0.542715	0.0682675	0.469171	0.123872	0.506543	0.0928481	-0.268373	0.399003	0.0812436	0.801814
ENSMUSG00000026727	13076821	13271415	Ras suppressor protein 1 [Source:MGI Symbol;Acc:MGI:103040]	Rsu1	protein_coding	-1	yellow	-0.586201	0.0451604	0.310603	0.325796	0.51072	0.0897442	-0.492354	0.103931	-0.928962	1.26352e-05	0.751385	0.00484085	-0.835227	0.000720326	0.324607	0.303273	0.310756	0.325546	0.419547	0.174557	-0.393063	0.206229	0.736794	0.00626728	-0.29518	0.351624	0.442889	0.149329	-0.380032	0.223014	0.786856	0.00239205	0.139045	0.666488	0.522505	0.0813664	-0.652607	0.0214245	-0.205045	0.522636
ENSMUSG00000026096	53313624	53326343	O-sialoglycoprotein endopeptidase-like 1 [Source:MGI Symbol;Acc:MGI:1919335]	Osgepl1	protein_coding	1	yellow	-0.51614	0.085822	0.02762	0.932098	0.569984	0.053005	-0.762122	0.00395924	-0.486344	0.108879	0.339184	0.280782	-0.487677	0.107768	0.344895	0.272238	0.426551	0.166724	0.13453	0.676789	0.138483	0.667767	0.609456	0.0353954	-0.205952	0.520756	0.204179	0.524431	-0.33926	0.280668	0.613084	0.0340211	-0.0448831	0.889842	0.166765	0.604444	-0.672799	0.0165043	0.206876	0.518845
ENSMUSG00000048118	71015990	71098592	AT rich interactive domain 4A (RBP1-like) [Source:MGI Symbol;Acc:MGI:2444354]	Arid4a	protein_coding	1	yellow	-0.155709	0.62893	-0.112182	0.728507	0.281616	0.375209	-0.570673	0.0526536	-0.483411	0.11135	0.47002	0.1231	-0.834833	0.000728474	-0.176435	0.58333	0.852119	0.000432167	0.638815	0.0253485	-0.681066	0.0147515	0.880829	0.000154467	0.298392	0.346157	0.531008	0.075663	-0.458265	0.134062	0.722526	0.00794734	0.64713	0.0229254	0.864975	0.000280542	-0.359294	0.251368	-0.156251	0.627721
ENSMUSG00000079043	130613840	130630027	FAST kinase domains 5 [Source:MGI Symbol;Acc:MGI:2139469]	Fastkd5	protein_coding	-1	yellow	-0.282496	0.373654	-0.222105	0.487806	0.565085	0.0555514	-0.807979	0.00147468	-0.554471	0.0613583	0.430983	0.161885	-0.702383	0.0108658	0.0381838	0.906215	0.574028	0.050966	0.495977	0.101021	-0.364152	0.244546	0.771129	0.00331849	0.117639	0.715774	0.287467	0.364937	-0.361236	0.248628	0.544711	0.0670587	0.566832	0.0546339	0.518044	0.0844725	-0.295861	0.350462	-0.00850356	0.979075
ENSMUSG00000024867	24294794	24555872	phosphatidylinositol-4-phosphate 5-kinase, type 1 beta [Source:MGI Symbol;Acc:MGI:107930]	Pip5k1b	protein_coding	-1	yellow	0.0877655	0.786217	-0.374646	0.230185	0.240288	0.451889	-0.641745	0.0244744	-0.304512	0.335869	0.325357	0.302092	-0.723865	0.00777681	-0.410362	0.185172	0.810951	0.00137133	0.65244	0.0214691	-0.432674	0.160063	0.827855	0.000884849	0.559951	0.05831	0.337891	0.282737	-0.513819	0.0874869	0.465967	0.126811	0.58968	0.0435907	0.553723	0.0617829	-0.211463	0.509407	0.290968	0.358862
ENSMUSG00000011831	107744795	107875107	ecotropic viral integration site 5 [Source:MGI Symbol;Acc:MGI:104736]	Evi5	protein_coding	-1	yellow	-0.153194	0.63455	0.168291	0.601092	0.402907	0.194076	-0.6687	0.0174282	-0.366838	0.240821	0.50989	0.0903556	-0.687947	0.0134005	0.0212322	0.94778	0.594036	0.0416808	0.554587	0.0612926	-0.560324	0.0581063	0.731921	0.00680774	0.0935134	0.772531	0.557903	0.0594367	-0.514976	0.0866547	0.733084	0.0066757	0.532777	0.074512	0.735849	0.00636948	-0.512648	0.0883353	-0.385909	0.215346
ENSMUSG00000042323	31019138	31121592	polybromo 1 [Source:MGI Symbol;Acc:MGI:1923998]	Pbrm1	protein_coding	1	yellow	0.0854237	0.79181	-0.211687	0.508949	0.699251	0.0113826	-0.720379	0.00822671	0.00197715	0.995134	0.451267	0.140878	-0.412879	0.182224	0.100068	0.756996	0.744079	0.00552046	0.552659	0.0623906	-0.100784	0.755305	0.689817	0.0130496	0.158641	0.622401	0.142606	0.658398	-0.414559	0.180273	0.587792	0.0444377	0.528894	0.0770549	0.514058	0.0873144	-0.396555	0.201865	0.204291	0.524198
ENSMUSG00000021510	67612763	67637791	zinc finger protein 729a [Source:MGI Symbol;Acc:MGI:3036250]	Zfp729a	protein_coding	-1	yellow	0.0807565	0.802981	-0.259477	0.415404	0.388749	0.211699	-0.679622	0.0150472	-0.302603	0.339061	0.325852	0.301314	-0.774007	0.00313139	-0.402088	0.195069	0.661359	0.0191764	0.727728	0.00729998	-0.685581	0.0138541	0.833201	0.000762956	0.539469	0.0702658	0.367506	0.2399	-0.70054	0.0111676	0.368239	0.238891	0.774518	0.00309906	0.533053	0.0743335	-0.258519	0.417189	-0.110931	0.731435
ENSMUSG00000027180	104027721	104063240	F-box protein 3 [Source:MGI Symbol;Acc:MGI:1929084]	Fbxo3	protein_coding	1	yellow	0.200896	0.531264	-0.0953363	0.768203	0.341484	0.277323	-0.337428	0.28344	0.0959534	0.76674	0.19033	0.553508	-0.30861	0.329074	-0.0930875	0.773544	0.697076	0.011752	0.494089	0.10253	-0.425493	0.167894	0.513797	0.0875031	0.302055	0.339979	0.322465	0.30666	-0.322778	0.306165	0.359943	0.25045	0.606469	0.0365563	0.681224	0.0147193	-0.122254	0.705056	-0.213357	0.505532
ENSMUSG00000050069	174833785	174921819	gremlin 2, DAN family BMP antagonist [Source:MGI Symbol;Acc:MGI:1344367]	Grem2	protein_coding	-1	yellow	0.411922	0.183341	-0.423426	0.170191	0.115869	0.719897	-0.495289	0.101569	-0.00514777	0.987332	0.12812	0.691504	-0.592783	0.042224	-0.6587	0.0198402	0.744477	0.00548168	0.752264	0.0047636	-0.68071	0.0148239	0.723969	0.00776362	0.823977	0.000982289	0.472599	0.120776	-0.671111	0.0168802	0.179683	0.576302	0.832583	0.000776357	0.586267	0.0451301	-0.0706534	0.827279	0.0309591	0.923909
ENSMUSG00000085379	58965748	58978050	RIKEN cDNA 2310058D17 gene [Source:MGI Symbol;Acc:MGI:1922944]	2310058D17Rik	processed_transcript	-1	yellow	-0.219896	0.492255	0.163336	0.612	0.476376	0.117426	-0.468224	0.124736	-0.593532	0.0418987	0.637249	0.0258248	-0.673629	0.0163218	0.179583	0.576517	0.251634	0.430135	0.49387	0.102706	-0.476881	0.116983	0.677654	0.0154573	-0.0494221	0.878771	0.468847	0.124167	-0.339597	0.280158	0.56634	0.0548912	0.277054	0.383321	0.54275	0.0682465	-0.436088	0.156423	-0.278241	0.381201
ENSMUSG00000024668	10500534	10526142	succinate dehydrogenase complex assembly factor 2 [Source:MGI Symbol;Acc:MGI:1913322]	Sdhaf2	protein_coding	-1	yellow	-0.127128	0.693791	-0.432847	0.159876	0.354958	0.257551	-0.735459	0.00641206	-0.322776	0.306167	0.163111	0.612497	-0.447688	0.14445	-0.0877319	0.786298	0.56451	0.055856	0.329787	0.295169	-0.107609	0.739228	0.57179	0.0520875	0.253941	0.425776	0.149353	0.643165	-0.155225	0.630011	0.3252	0.30234	0.467873	0.125057	0.354143	0.258723	-0.0352566	0.913379	0.280132	0.377838
ENSMUSG00000049659	20685084	20741589	aftiphilin [Source:MGI Symbol;Acc:MGI:1923012]	Aftph	protein_coding	-1	yellow	-0.0139552	0.965666	-0.443566	0.148634	0.125543	0.697448	-0.566987	0.054553	-0.294162	0.353367	0.293146	0.35511	-0.754426	0.00457744	-0.429823	0.163144	0.9213	2.08114e-05	0.599783	0.0392525	-0.597036	0.0404003	0.79584	0.00196024	0.512333	0.0885644	0.238592	0.455184	-0.354626	0.258028	0.558272	0.0592327	0.749696	0.00499202	0.698277	0.011547	-0.0967815	0.764776	0.136319	0.672701
ENSMUSG00000040118	15934691	16374511	calcium channel, voltage-dependent, alpha2/delta subunit 1 [Source:MGI Symbol;Acc:MGI:88295]	Cacna2d1	protein_coding	1	yellow	-0.106038	0.742921	-0.107288	0.739982	0.405888	0.190485	-0.602852	0.0379978	-0.51355	0.0876814	0.476745	0.117102	-0.87917	0.000165043	-0.245784	0.441286	0.687105	0.0135607	0.692737	0.0125155	-0.631382	0.0276669	0.917753	2.57857e-05	0.37316	0.232188	0.439156	0.153196	-0.680492	0.0148686	0.552301	0.0625956	0.545728	0.0664484	0.582503	0.0468717	-0.452904	0.139265	-0.0487219	0.880477
ENSMUSG00000027650	157981803	158028433	TELO2 interacting protein 1 [Source:MGI Symbol;Acc:MGI:1922675]	Tti1	protein_coding	-1	yellow	0.0355094	0.91276	0.0335315	0.917605	0.178103	0.579716	-0.389526	0.210707	-0.460073	0.132336	0.518799	0.0839407	-0.81656	0.00119153	-0.36992	0.236589	0.495533	0.101374	0.719707	0.00831563	-0.739854	0.00594488	0.727967	0.00727124	0.380664	0.222183	0.453888	0.1383	-0.642502	0.0242522	0.485622	0.109484	0.583406	0.0464499	0.581219	0.0474769	-0.32121	0.308656	-0.187415	0.559712
ENSMUSG00000106990	28211008	28214805	predicted gene 42547 [Source:MGI Symbol;Acc:MGI:5662684]	Gm42547	TEC	-1	yellow	0.124129	0.700716	-0.0460193	0.887069	0.230268	0.471523	-0.425058	0.168375	-0.495373	0.101502	0.492241	0.104022	-0.795945	0.00195559	-0.388768	0.211674	0.572297	0.0518319	0.802656	0.00167464	-0.66684	0.0178595	0.800094	0.00177794	0.486575	0.108686	0.661245	0.0192044	-0.729123	0.00713334	0.416411	0.178137	0.600119	0.0391137	0.648614	0.0225115	-0.34085	0.278274	-0.029372	0.927801
ENSMUSG00000041935	3982035	3995744	expressed sequence AW549877 [Source:MGI Symbol;Acc:MGI:2146232]	AW549877	protein_coding	-1	yellow	0.117587	0.715895	-0.456021	0.136224	0.270264	0.39556	-0.662532	0.0188887	-0.0658885	0.838787	0.101667	0.753219	-0.607177	0.0362788	-0.444055	0.148134	0.815474	0.00122484	0.581178	0.0474959	-0.547042	0.0656654	0.753309	0.0046729	0.606614	0.0364991	0.280077	0.377936	-0.573092	0.0514328	0.322178	0.307116	0.763259	0.00387356	0.511821	0.0889379	-0.184738	0.565434	0.0391353	0.903887
ENSMUSG00000115018	25244819	25246863	NADPH dependent diflavin oxidoreductase 1 [Source:MGI Symbol;Acc:MGI:1926047]	Ndor1	protein_coding	-1	yellow	-0.0540378	0.867533	-0.0333833	0.917968	0.510525	0.0898878	-0.649523	0.0222606	-0.468144	0.124809	0.624752	0.0298606	-0.835257	0.000719705	-0.12118	0.707546	0.630277	0.0280242	0.745354	0.00539696	-0.534535	0.0733798	0.921056	2.11266e-05	0.274275	0.388306	0.55713	0.0598656	-0.76286	0.00390345	0.647609	0.0227913	0.512799	0.088226	0.603606	0.037694	-0.646678	0.0230526	-0.00192417	0.995265
ENSMUSG00000108621	39544402	39580589	predicted gene, 37494 [Source:MGI Symbol;Acc:MGI:5610722]	Gm37494	lincRNA	1	yellow	0.306742	0.332163	-0.236493	0.459278	0.183266	0.56859	-0.547815	0.0652075	-0.111173	0.73087	0.25018	0.432894	-0.698122	0.0115732	-0.590565	0.0431981	0.711033	0.00952891	0.776478	0.00297727	-0.719196	0.00838373	0.77318	0.00318431	0.716816	0.0087063	0.475264	0.118406	-0.765265	0.00372588	0.310897	0.325315	0.776641	0.00296732	0.580062	0.0480266	-0.220259	0.491522	-0.0786313	0.80808
ENSMUSG00000027861	102086415	102146514	calsequestrin 2 [Source:MGI Symbol;Acc:MGI:1309469]	Casq2	protein_coding	1	yellow	0.345576	0.271229	-0.119873	0.710581	-0.143831	0.655625	-0.164045	0.610435	-0.0637783	0.843894	0.091042	0.778409	-0.502814	0.0956795	-0.690608	0.0129034	0.442834	0.149386	0.591166	0.0429324	-0.579454	0.0483168	0.471637	0.12164	0.683698	0.0142233	0.425323	0.168081	-0.714592	0.0090162	0.0731019	0.821377	0.492486	0.103823	0.312556	0.322602	-0.156277	0.627663	0.0190873	0.95305
ENSMUSG00000047420	35312668	35326141	family with sequence similarity 180, member A [Source:MGI Symbol;Acc:MGI:3039626]	Fam180a	protein_coding	-1	yellow	0.231285	0.469512	-0.0870904	0.787829	-0.209487	0.513464	-0.14412	0.654971	-0.162825	0.613129	0.144517	0.654071	-0.533006	0.0743636	-0.625431	0.0296303	0.480088	0.114193	0.500685	0.0973223	-0.44859	0.143545	0.475369	0.118314	0.595732	0.0409532	0.330475	0.294101	-0.554969	0.0610769	0.195224	0.543157	0.30208	0.339939	0.29472	0.352411	-0.147027	0.648404	0.17559	0.585162
ENSMUSG00000056014	138622859	138652414	RIKEN cDNA A430033K04 gene [Source:MGI Symbol;Acc:MGI:3583896]	A430033K04Rik	protein_coding	1	yellow	-0.175618	0.585102	-0.18239	0.570472	0.688997	0.0132026	-0.54786	0.0651811	-0.287567	0.364763	0.620992	0.0311591	-0.441505	0.150755	0.279657	0.378681	0.446104	0.146049	0.414786	0.18001	-0.0213359	0.947525	0.55262	0.0624127	-0.152672	0.635718	-0.108939	0.736105	-0.17124	0.594637	0.596864	0.0404729	0.367512	0.239892	0.328986	0.296414	-0.337172	0.283829	0.269271	0.397365
ENSMUSG00000054604	64851996	64859507	CGG triplet repeat binding protein 1 [Source:MGI Symbol;Acc:MGI:2146370]	Cggbp1	protein_coding	1	yellow	-0.355464	0.256826	0.0654986	0.839731	0.5492	0.0643933	-0.7233	0.00784846	-0.554718	0.0612185	0.631292	0.0276959	-0.665865	0.0180887	0.290938	0.358914	0.647724	0.0227592	0.475044	0.1186	-0.252188	0.429086	0.786412	0.00241513	-0.127742	0.692374	0.601634	0.0384924	-0.406181	0.190134	0.873699	0.000203986	0.361901	0.247693	0.734736	0.00649141	-0.687353	0.0135133	-0.0296535	0.92711
ENSMUSG00000026771	23506220	23572106	speckle-type BTB/POZ protein-like [Source:MGI Symbol;Acc:MGI:1924107]	Spopl	protein_coding	-1	yellow	-0.0243447	0.940137	-0.136844	0.671504	0.272663	0.391213	-0.474898	0.11873	-0.0578206	0.85834	0.238833	0.454716	-0.442899	0.149319	-0.0684591	0.832575	0.659349	0.0196768	0.42663	0.166638	-0.402363	0.194736	0.61256	0.0342172	0.214812	0.502564	0.528414	0.0773732	-0.518062	0.0844599	0.512588	0.0883793	0.495129	0.101697	0.598114	0.0399469	-0.533748	0.0738855	-0.114254	0.723665
ENSMUSG00000110932	5952442	5952667	predicted gene, 48640 [Source:MGI Symbol;Acc:MGI:6098247]	Gm48640	processed_pseudogene	-1	yellow	-0.196558	0.54035	-0.329569	0.295507	0.347623	0.268209	-0.594028	0.0416844	-0.603894	0.0375784	0.525656	0.0792198	-0.83277	0.000772276	-0.203839	0.525138	0.667574	0.0176884	0.601781	0.0384324	-0.43176	0.161046	0.824796	0.000961072	0.271551	0.393225	0.210069	0.512268	-0.404715	0.191892	0.578772	0.0486446	0.539968	0.0699563	0.506493	0.0928857	-0.278832	0.380148	0.275269	0.386519
ENSMUSG00000028630	118855603	118870209	dual-specificity tyrosine-(Y)-phosphorylation regulated kinase 2 [Source:MGI Symbol;Acc:MGI:1330301]	Dyrk2	protein_coding	-1	yellow	0.0299045	0.926495	-0.170317	0.596654	0.235811	0.460612	-0.60879	0.0356518	-0.17521	0.585986	0.334695	0.287605	-0.638163	0.0255459	-0.215569	0.501024	0.926072	1.53465e-05	0.602016	0.0383366	-0.503192	0.0953904	0.806017	0.00154613	0.389695	0.210491	0.611648	0.0345603	-0.532715	0.074552	0.677702	0.0154474	0.621242	0.0310714	0.830271	0.000828042	-0.44202	0.150224	-0.0196822	0.951588
ENSMUSG00000025558	121542046	121797837	dedicator of cytokinesis 9 [Source:MGI Symbol;Acc:MGI:106321]	Dock9	protein_coding	-1	yellow	0.0313733	0.922894	-0.0986483	0.760355	0.376804	0.227295	-0.595154	0.0412001	-0.37956	0.223638	0.497504	0.0998111	-0.86549	0.000275484	-0.313843	0.320507	0.731551	0.00685012	0.783231	0.00258542	-0.751767	0.00480718	0.921912	2.00355e-05	0.448429	0.143706	0.528843	0.0770887	-0.746847	0.00525503	0.576333	0.0498286	0.690506	0.0129221	0.69979	0.0112923	-0.459734	0.132659	-0.163786	0.611007
ENSMUSG00000027189	102300119	102407828	tripartite motif-containing 44 [Source:MGI Symbol;Acc:MGI:1931835]	Trim44	protein_coding	-1	yellow	0.0120259	0.970411	-0.090147	0.78054	0.450734	0.141407	-0.732061	0.00679166	-0.383364	0.218647	0.550681	0.0635304	-0.856746	0.000371685	-0.228659	0.474714	0.817131	0.0011743	0.79373	0.00205583	-0.633411	0.0270193	0.965294	3.74087e-07	0.400966	0.196436	0.59426	0.0415843	-0.745287	0.00540336	0.694945	0.0121226	0.682234	0.0145154	0.76498	0.00374657	-0.538052	0.0711507	-0.0732883	0.820928
ENSMUSG00000034563	72985429	73016340	cell cycle progression 1 [Source:MGI Symbol;Acc:MGI:1196419]	Ccpg1	protein_coding	1	yellow	-0.192358	0.549209	0.00756494	0.981385	0.341572	0.27719	-0.550878	0.0634163	-0.513718	0.0875603	0.521738	0.0818945	-0.849655	0.000467361	-0.186653	0.561339	0.525723	0.0791745	0.555185	0.0609551	-0.512922	0.0881365	0.802119	0.00169589	0.23053	0.471005	0.201297	0.530428	-0.556782	0.0600595	0.593727	0.0418143	0.331136	0.293079	0.386271	0.214879	-0.452491	0.139671	-0.0157182	0.961331
ENSMUSG00000076898	54187895	54187951	T cell receptor alpha joining 31 [Source:MGI Symbol;Acc:MGI:4440519]	Traj31	TR_J_gene	1	yellow	-0.56732	0.0543791	0.130841	0.685247	0.498878	0.0987308	-0.641189	0.0246386	-0.573881	0.0510392	0.240891	0.45072	-0.43949	0.152848	0.379212	0.224098	0.327771	0.298308	0.0924795	0.774989	-0.0583318	0.857098	0.499321	0.0983846	-0.259056	0.416188	0.327704	0.298413	-0.215713	0.50073	0.499405	0.0983186	0.0824858	0.798838	0.312999	0.321881	-0.466832	0.126013	-0.164613	0.609181
ENSMUSG00000021140	81860023	82000924	pecanex homolog [Source:MGI Symbol;Acc:MGI:1891924]	Pcnx	protein_coding	1	yellow	0.144021	0.655194	0.191021	0.552042	0.231927	0.468246	-0.313976	0.320291	-0.429321	0.16369	0.561044	0.0577152	-0.745637	0.00536982	-0.289774	0.360927	0.379794	0.223329	0.753976	0.00461576	-0.666651	0.0179039	0.731093	0.00690284	0.373066	0.232314	0.685898	0.0137928	-0.773916	0.00313722	0.427369	0.165824	0.401963	0.195221	0.560819	0.057837	-0.492325	0.103953	-0.189506	0.55526
ENSMUSG00000117284	22285871	22314837	predicted gene 7072 [Source:MGI Symbol;Acc:MGI:3648314]	Gm7072	protein_coding	-1	yellow	-0.507038	0.092477	0.371786	0.234048	0.537207	0.0716823	-0.605421	0.0369698	-0.678852	0.0152068	0.670949	0.0169167	-0.810342	0.00139206	0.309454	0.327683	0.51558	0.0862217	0.444621	0.147556	-0.485948	0.10921	0.806939	0.00151222	-0.221386	0.489253	0.552784	0.0623188	-0.507178	0.0923721	0.903899	5.48302e-05	0.238881	0.454622	0.676565	0.0156878	-0.792714	0.00210308	-0.402563	0.194493
ENSMUSG00000035093	125736986	125782870	SECIS binding protein 2-like [Source:MGI Symbol;Acc:MGI:1917604]	Secisbp2l	protein_coding	-1	yellow	-0.423398	0.170223	0.15123	0.638951	0.473114	0.120316	-0.582034	0.047092	-0.74411	0.00551746	0.693601	0.0123607	-0.846441	0.000516557	0.177139	0.581802	0.442805	0.149415	0.499189	0.0984878	-0.597203	0.0403299	0.767816	0.0035442	-0.113509	0.725404	0.34655	0.26979	-0.262505	0.409783	0.779314	0.00280757	0.425501	0.167885	0.683504	0.0142619	-0.389813	0.210341	-0.360627	0.249486
ENSMUSG00000032905	46730144	46741580	autophagy related 12 [Source:MGI Symbol;Acc:MGI:1914776]	Atg12	protein_coding	-1	yellow	-0.517215	0.0850582	0.0186626	0.954094	0.386592	0.214465	-0.571309	0.052331	-0.771831	0.00327212	0.645982	0.0232497	-0.869624	0.000237388	0.112895	0.726841	0.640869	0.0247333	0.440242	0.152065	-0.374235	0.230737	0.812294	0.0013265	-0.0895716	0.781911	0.277537	0.382458	-0.328734	0.296807	0.862128	0.000309836	0.288842	0.362544	0.584087	0.0461332	-0.540766	0.0694627	0.0604917	0.851858
ENSMUSG00000015839	75675513	75704641	nuclear factor, erythroid derived 2, like 2 [Source:MGI Symbol;Acc:MGI:108420]	Nfe2l2	protein_coding	-1	yellow	-0.0607507	0.85123	-0.0745564	0.817874	0.274312	0.388239	-0.526353	0.0787501	-0.482321	0.112277	0.547192	0.0655761	-0.798902	0.00182766	-0.170636	0.595956	0.768552	0.0034931	0.675506	0.0159143	-0.578491	0.0487797	0.859874	0.000334676	0.305921	0.333525	0.585492	0.0454849	-0.480509	0.11383	0.700437	0.0111848	0.538998	0.0705593	0.814801	0.00124585	-0.395766	0.202846	-0.0170147	0.958144
ENSMUSG00000039068	152395473	152462826	zinc finger, ZZ domain containing 3 [Source:MGI Symbol;Acc:MGI:1920453]	Zzz3	protein_coding	1	yellow	-0.137322	0.670412	-0.237715	0.456894	0.551464	0.0630774	-0.740786	0.00584925	-0.465127	0.127589	0.592844	0.0421973	-0.795407	0.00197959	-0.0565322	0.861469	0.667164	0.0177838	0.676428	0.015717	-0.524713	0.0798578	0.875806	0.000188222	0.206047	0.52056	0.377502	0.226367	-0.52063	0.082662	0.660748	0.0193276	0.686071	0.0137593	0.64847	0.0225516	-0.442473	0.149757	-0.00276976	0.993184
ENSMUSG00000028345	48430858	48473459	testis expressed gene 10 [Source:MGI Symbol;Acc:MGI:1344413]	Tex10	protein_coding	-1	yellow	-0.0165478	0.959292	0.379045	0.224319	0.797902	0.00187019	-0.592176	0.0424892	-0.0770655	0.811841	0.615988	0.0329491	-0.321055	0.308901	0.451953	0.140201	0.431641	0.161175	0.496016	0.100989	-0.0708545	0.826794	0.582986	0.0466455	-0.20056	0.531966	0.546406	0.0660437	-0.607991	0.0359613	0.695886	0.0119578	0.233262	0.465616	0.547428	0.0654362	-0.834742	0.00073037	-0.204417	0.523937
ENSMUSG00000027652	158409848	158499253	Ral GTPase activating protein, beta subunit (non-catalytic) [Source:MGI Symbol;Acc:MGI:2444531]	Ralgapb	protein_coding	1	yellow	-0.0295799	0.927291	0.282961	0.372834	0.66316	0.0187361	-0.463394	0.129204	-0.436577	0.155905	0.850036	0.000461773	-0.782901	0.00260362	0.0912945	0.777808	0.575095	0.0504373	0.802422	0.00168385	-0.554064	0.0615895	0.832432	0.000779637	0.0383741	0.905749	0.413096	0.181971	-0.671381	0.0168197	0.779295	0.00280867	0.496998	0.100211	0.711324	0.00948631	-0.620381	0.0313738	-0.216999	0.498118
ENSMUSG00000021981	59440972	59585764	calcium binding protein 39-like [Source:MGI Symbol;Acc:MGI:1914081]	Cab39l	protein_coding	1	yellow	-0.318339	0.313244	0.0386678	0.905031	0.508513	0.0913754	-0.752659	0.00472914	-0.565657	0.0552496	0.498826	0.0987714	-0.856367	0.000376372	-0.009466	0.976708	0.742033	0.00572305	0.560801	0.0578469	-0.473251	0.120194	0.919411	2.33549e-05	0.14776	0.646752	0.443408	0.148797	-0.613229	0.0339672	0.748037	0.00514394	0.419825	0.174242	0.612619	0.0341953	-0.606934	0.0363737	-0.100028	0.757092
ENSMUSG00000041775	138835823	138846273	mitogen-activated protein kinase 1 interacting protein 1 [Source:MGI Symbol;Acc:MGI:1916796]	Mapk1ip1	protein_coding	-1	yellow	0.0448636	0.889889	0.0936939	0.772103	0.361277	0.24857	-0.477218	0.116687	-0.423321	0.170308	0.529224	0.0768363	-0.816789	0.0011846	-0.279935	0.378188	0.475227	0.118439	0.741731	0.00575344	-0.673622	0.0163233	0.820093	0.00108799	0.374943	0.229786	0.53442	0.0734539	-0.823035	0.00100717	0.468481	0.124501	0.473058	0.120366	0.50078	0.0972487	-0.538229	0.0710399	-0.180473	0.574598
ENSMUSG00000001687	148504635	148552789	ubiquitin-like 3 [Source:MGI Symbol;Acc:MGI:1344373]	Ubl3	protein_coding	-1	yellow	-0.25676	0.420478	-0.0872665	0.787408	0.520237	0.0829357	-0.810709	0.00137955	-0.507594	0.0920603	0.514974	0.0866561	-0.830512	0.00082253	-0.0101743	0.974965	0.794695	0.00201169	0.58127	0.0474524	-0.464145	0.128502	0.92815	1.33557e-05	0.182597	0.570026	0.404023	0.192726	-0.493714	0.102832	0.768488	0.00349751	0.513772	0.0875213	0.685216	0.0139252	-0.492769	0.103594	-0.047362	0.883793
ENSMUSG00000093896	115847881	115848331	immunoglobulin heavy variable 1-76 [Source:MGI Symbol;Acc:MGI:4439737]	Ighv1-76	IG_V_gene	-1	yellow	-0.164889	0.608574	0.200735	0.5316	0.137265	0.670542	-0.390582	0.209364	-0.403038	0.193917	0.388953	0.211438	-0.635107	0.0264866	-0.163901	0.610751	0.367355	0.240108	0.392434	0.207021	-0.37985	0.223256	0.543279	0.0679243	0.135312	0.675003	0.265079	0.405038	-0.490149	0.105728	0.509634	0.0905443	0.176701	0.582751	0.306091	0.333243	-0.425288	0.168121	-0.0967882	0.76476
ENSMUSG00000101249	24615706	24616197	predicted gene 29216 [Source:MGI Symbol;Acc:MGI:5579922]	Gm29216	unprocessed_pseudogene	-1	yellow	-0.471629	0.121647	-0.022509	0.944644	0.505049	0.093976	-0.681376	0.0146886	-0.771281	0.00330843	0.663544	0.0186431	-0.883221	0.000140158	0.107231	0.740115	0.607939	0.0359817	0.486287	0.108926	-0.301106	0.341575	0.86389	0.000291437	-0.0411139	0.899049	0.248358	0.436363	-0.415601	0.17907	0.808981	0.00143921	0.269512	0.396926	0.482853	0.111823	-0.574135	0.0509125	0.163357	0.611954
ENSMUSG00000032718	134609207	134632488	MANSC domain containing 1 [Source:MGI Symbol;Acc:MGI:1914979]	Mansc1	protein_coding	-1	yellow	-0.0552557	0.864571	0.00885724	0.978205	0.650402	0.0220198	-0.450738	0.141403	-0.415101	0.179646	0.621631	0.0309357	-0.493987	0.102612	0.214192	0.503828	0.479969	0.114296	0.58042	0.0478557	-0.181567	0.572241	0.638731	0.0253738	-0.0181043	0.955466	0.353361	0.25985	-0.369468	0.237207	0.52937	0.0767397	0.389775	0.21039	0.558888	0.0588928	-0.380575	0.2223	0.106565	0.741681
ENSMUSG00000026782	60409619	60481158	abl-interactor 2 [Source:MGI Symbol;Acc:MGI:106913]	Abi2	protein_coding	1	yellow	-0.253871	0.425907	0.0803634	0.803924	0.367901	0.239357	-0.353183	0.260108	-0.574182	0.0508893	0.444785	0.147389	-0.675915	0.0158265	-0.0281221	0.930866	0.183857	0.567322	0.393463	0.205726	-0.364637	0.24387	0.619442	0.0317058	0.0711955	0.825971	0.202344	0.528246	-0.494667	0.102067	0.343592	0.274174	0.0879675	0.785736	0.142709	0.658166	-0.458427	0.133906	-0.027789	0.931683
ENSMUSG00000027508	9687479	9833679	phosphoprotein associated with glycosphingolipid microdomains 1 [Source:MGI Symbol;Acc:MGI:2443160]	Pag1	protein_coding	-1	yellow	0.224423	0.483156	-0.184619	0.565689	0.150036	0.64163	-0.419681	0.174405	-0.328843	0.296637	0.403306	0.193592	-0.799797	0.00179024	-0.548961	0.0645331	0.631858	0.0275138	0.824918	0.000957924	-0.860161	0.000331429	0.777026	0.00294391	0.623772	0.0301952	0.491399	0.104706	-0.650237	0.0220651	0.360662	0.249437	0.818095	0.00114567	0.689179	0.0131686	-0.129744	0.687767	-0.173434	0.589851
ENSMUSG00000034981	91517615	91626894	prostate androgen-regulated mucin-like protein 1 [Source:MGI Symbol;Acc:MGI:2443349]	Parm1	protein_coding	1	yellow	-0.197821	0.537698	-0.0579211	0.858095	0.383397	0.218605	-0.64752	0.0228162	-0.541634	0.0689288	0.560803	0.0578458	-0.90238	5.91492e-05	-0.127626	0.692642	0.827882	0.00088422	0.671151	0.0168712	-0.669055	0.0173466	0.939005	5.99882e-06	0.253143	0.42728	0.487771	0.10769	-0.510569	0.0898555	0.782672	0.00261628	0.613917	0.0337112	0.825165	0.00095161	-0.436717	0.155757	-0.153976	0.632799
ENSMUSG00000053347	21962552	22071168	zinc finger prtoein 943 [Source:MGI Symbol;Acc:MGI:1921920]	Zfp943	protein_coding	1	yellow	0.187423	0.559695	-0.323855	0.304461	0.136451	0.6724	-0.428828	0.164227	-0.33425	0.288285	0.369997	0.236484	-0.800299	0.00176951	-0.587631	0.0445107	0.712391	0.00933073	0.780948	0.00271322	-0.669108	0.0173344	0.808692	0.00144937	0.65683	0.0203171	0.386538	0.214535	-0.682944	0.0143732	0.358502	0.252491	0.693648	0.0123522	0.544256	0.0673331	-0.208579	0.515333	0.169474	0.5985
ENSMUSG00000095571	113859149	113859670	immunoglobulin heavy variable 5-17 [Source:MGI Symbol;Acc:MGI:4439533]	Ighv5-17	IG_V_gene	-1	yellow	0.114468	0.723165	-0.216133	0.499877	0.445248	0.146918	-0.640875	0.0247316	-0.219356	0.493346	0.300891	0.341937	-0.614474	0.0335049	-0.264202	0.406652	0.46435	0.128312	0.65588	0.0205624	-0.652343	0.0214951	0.69385	0.0123163	0.424784	0.168679	0.390378	0.209623	-0.603871	0.0375878	0.264516	0.406072	0.775424	0.00304233	0.499183	0.0984924	-0.207559	0.517437	-0.269835	0.396339
ENSMUSG00000029094	35893319	36003923	actin filament associated protein 1 [Source:MGI Symbol;Acc:MGI:1917542]	Afap1	protein_coding	1	yellow	0.150394	0.640826	-0.169025	0.599484	0.296678	0.34907	-0.529746	0.0764917	-0.399662	0.198031	0.503132	0.0954359	-0.835027	0.000724454	-0.413568	0.181422	0.71576	0.00885247	0.834398	0.000737536	-0.65055	0.0219797	0.899471	6.81593e-05	0.550585	0.0635859	0.575441	0.0502666	-0.756861	0.0043745	0.491648	0.104504	0.643751	0.023889	0.657437	0.0201613	-0.393911	0.205164	0.0769343	0.812156
ENSMUSG00000099267	78891840	78891913	microRNA 6955 [Source:MGI Symbol;Acc:MGI:5531151]	Mir6955	miRNA	1	yellow	-0.0423735	0.895971	0.125846	0.696748	0.467603	0.125304	-0.652527	0.021446	-0.356461	0.255398	0.339309	0.280594	-0.669773	0.0171828	-0.093233	0.773198	0.593386	0.0419618	0.624771	0.0298542	-0.592427	0.0423791	0.794453	0.00202269	0.294187	0.353324	0.725837	0.00753055	-0.748819	0.00507192	0.477687	0.116277	0.537485	0.0715073	0.66245	0.0189089	-0.529737	0.0764978	-0.375438	0.229122
ENSMUSG00000000056	121237253	121255856	nuclear prelamin A recognition factor [Source:MGI Symbol;Acc:MGI:1914858]	Narf	protein_coding	1	yellow	0.135781	0.673931	0.0638109	0.843815	-0.061014	0.850591	-0.211513	0.509305	-0.373326	0.231964	0.318812	0.312486	-0.711088	0.00952091	-0.513228	0.0879144	0.576797	0.0496016	0.664447	0.0184259	-0.702927	0.0107778	0.64564	0.0233468	0.521557	0.0820198	0.601917	0.038377	-0.652158	0.0215449	0.370526	0.235762	0.488571	0.107027	0.614661	0.0334362	-0.251498	0.430392	-0.128362	0.690947
ENSMUSG00000022257	34238028	34284302	lysosomal-associated protein transmembrane 4B [Source:MGI Symbol;Acc:MGI:1890494]	Laptm4b	protein_coding	1	yellow	0.154595	0.631417	-0.20459	0.523579	0.287178	0.36544	-0.673942	0.0162532	-0.0288139	0.929169	0.202376	0.528179	-0.579879	0.0481139	-0.311812	0.323817	0.890795	0.000101561	0.63295	0.0271657	-0.543188	0.0679797	0.788488	0.00230868	0.521816	0.0818405	0.609454	0.0353962	-0.667575	0.0176882	0.512163	0.0886885	0.710047	0.00967474	0.742042	0.00572213	-0.407889	0.188096	-0.105283	0.744697
ENSMUSG00000029920	65042583	65116061	SWI/SNF-related, matrix-associated actin-dependent regulator of chromatin, subfamily a, containing DEAD/H box 1 [Source:MGI Symbol;Acc:MGI:95453]	Smarcad1	protein_coding	1	yellow	-0.537287	0.0716318	0.179705	0.576254	0.727211	0.0073625	-0.792654	0.00210592	-0.665162	0.0182553	0.686088	0.013756	-0.697058	0.011755	0.443961	0.14823	0.424604	0.16888	0.368471	0.238573	-0.125803	0.696848	0.767892	0.00353893	-0.311153	0.324895	0.378342	0.22525	-0.448543	0.143592	0.845403	0.000533266	0.144773	0.653492	0.430824	0.162057	-0.822128	0.00103157	-0.0298256	0.926688
ENSMUSG00000055660	94722590	94750019	methyltransferase like 4 [Source:MGI Symbol;Acc:MGI:1924031]	Mettl4	protein_coding	-1	yellow	-0.273796	0.389169	0.247401	0.438191	0.566061	0.0550372	-0.687256	0.0135317	-0.551234	0.0632099	0.678606	0.0152579	-0.773185	0.00318401	0.161937	0.615094	0.43183	0.16097	0.567927	0.0540639	-0.526086	0.07893	0.774617	0.00309283	-0.0572551	0.859713	0.484512	0.110417	-0.537385	0.0715698	0.762585	0.0039242	0.423747	0.169833	0.621616	0.0309409	-0.615568	0.0331027	-0.371613	0.234283
ENSMUSG00000031174	10073621	10216920	retinitis pigmentosa GTPase regulator [Source:MGI Symbol;Acc:MGI:1344037]	Rpgr	protein_coding	-1	yellow	-0.228386	0.475255	-0.278467	0.380798	0.435463	0.157085	-0.70641	0.0102271	-0.348884	0.266359	0.245527	0.441779	-0.562632	0.0568577	0.00502636	0.987631	0.723664	0.00780219	0.382172	0.220204	-0.22123	0.489566	0.734258	0.00654437	0.188948	0.556447	0.343383	0.274485	-0.368945	0.237923	0.519804	0.0832377	0.416923	0.17755	0.501515	0.0966798	-0.384777	0.216811	0.14801	0.646189
ENSMUSG00000024085	64600736	64755110	mannosidase 2, alpha 1 [Source:MGI Symbol;Acc:MGI:104669]	Man2a1	protein_coding	1	yellow	-0.0796348	0.805671	0.44789	0.144247	0.744211	0.00550757	-0.439345	0.152999	-0.333895	0.28883	0.786102	0.00243134	-0.62794	0.0287906	0.286536	0.366562	0.389195	0.211129	0.651103	0.0218295	-0.433924	0.158723	0.723344	0.00784288	-0.126334	0.695622	0.443792	0.148403	-0.682596	0.0144427	0.721347	0.00809989	0.295526	0.351033	0.574337	0.0508125	-0.775237	0.00305397	-0.363995	0.244765
ENSMUSG00000034903	65088339	65239403	Cobl-like 1 [Source:MGI Symbol;Acc:MGI:2442894]	Cobll1	protein_coding	-1	yellow	-0.317804	0.314104	0.116461	0.718517	0.448355	0.14378	-0.495198	0.101641	-0.747812	0.00516485	0.702781	0.0108014	-0.896267	7.92937e-05	0.042864	0.894772	0.526838	0.0784248	0.60564	0.0368833	-0.51636	0.0856651	0.874286	0.000199499	0.0437312	0.892654	0.484467	0.110455	-0.540468	0.069647	0.729807	0.00705268	0.298739	0.34557	0.600626	0.038905	-0.605075	0.0371073	-0.0573297	0.859532
ENSMUSG00000021959	57689662	57758388	large tumor suppressor 2 [Source:MGI Symbol;Acc:MGI:1354386]	Lats2	protein_coding	-1	yellow	0.393468	0.20572	-0.168056	0.601607	0.0926091	0.774681	-0.340592	0.278661	-0.111402	0.730333	0.250316	0.432635	-0.648113	0.0226507	-0.601327	0.0386177	0.618179	0.0321566	0.803935	0.0016248	-0.833919	0.000747632	0.713468	0.0091758	0.732589	0.00673167	0.633403	0.027022	-0.741938	0.00573256	0.219908	0.49223	0.774552	0.0030969	0.669686	0.0172024	-0.167458	0.602921	-0.212578	0.507125
ENSMUSG00000037475	41794991	41920674	THO complex 2 [Source:MGI Symbol;Acc:MGI:2442413]	Thoc2	protein_coding	-1	yellow	-0.419689	0.174395	0.106615	0.741564	0.662726	0.0188415	-0.678337	0.0153141	-0.75482	0.00454416	0.75725	0.00434267	-0.817804	0.00115426	0.289263	0.361814	0.427236	0.165971	0.543448	0.0678221	-0.440891	0.151391	0.829443	0.000847196	-0.160798	0.617615	0.443479	0.148723	-0.411655	0.183654	0.777198	0.00293348	0.384472	0.217206	0.61833	0.0321023	-0.596906	0.0404551	-0.189703	0.55484
ENSMUSG00000022197	12359711	12739924	PDZ domain containing 2 [Source:MGI Symbol;Acc:MGI:1922394]	Pdzd2	protein_coding	-1	yellow	0.248108	0.436841	-0.195194	0.54322	0.0636685	0.84416	-0.327832	0.298214	-0.335374	0.286566	0.395755	0.20286	-0.762012	0.00396757	-0.568526	0.0537542	0.662721	0.0188427	0.786087	0.00243208	-0.670883	0.0169315	0.772885	0.00320338	0.648527	0.0225357	0.525582	0.0792699	-0.666161	0.018019	0.359615	0.250914	0.600074	0.0391325	0.607452	0.0361713	-0.217411	0.497282	0.11812	0.714654
ENSMUSG00000053477	69343356	69689079	transcription factor 4 [Source:MGI Symbol;Acc:MGI:98506]	Tcf4	protein_coding	1	yellow	-0.060986	0.850659	-0.0819378	0.80015	0.39292	0.206409	-0.605073	0.0371077	-0.536585	0.0720747	0.555929	0.0605368	-0.946224	3.23497e-06	-0.294112	0.353452	0.715218	0.00892811	0.794733	0.00200997	-0.795916	0.0019569	0.94297	4.31553e-06	0.400443	0.197075	0.480114	0.114171	-0.681453	0.0146729	0.606857	0.0364037	0.715708	0.0088597	0.724755	0.00766497	-0.383752	0.218142	-0.190893	0.552314
ENSMUSG00000017843	110447120	110583062	protein phosphatase 2, regulatory subunit B', gamma [Source:MGI Symbol;Acc:MGI:1349475]	Ppp2r5c	protein_coding	1	yellow	-0.368388	0.238688	-0.121377	0.707089	0.43334	0.159348	-0.734369	0.00653206	-0.554222	0.0614997	0.411107	0.184297	-0.784876	0.00249622	-0.0674543	0.835002	0.674437	0.0161456	0.430389	0.162529	-0.254368	0.424971	0.803727	0.00163282	0.136453	0.672397	0.15232	0.636506	-0.504	0.0947731	0.646681	0.0230518	0.311105	0.324974	0.343415	0.274437	-0.500279	0.0976378	0.203647	0.525535
ENSMUSG00000020134	21091291	21150323	pellino 1 [Source:MGI Symbol;Acc:MGI:1914495]	Peli1	protein_coding	1	yellow	-0.171879	0.593241	-0.111552	0.72998	0.477437	0.116496	-0.703498	0.0106861	-0.524886	0.0797406	0.537483	0.0715082	-0.838284	0.000659515	-0.066484	0.837348	0.792304	0.00212241	0.683881	0.0141871	-0.640567	0.0248234	0.922608	1.91815e-05	0.238041	0.456257	0.555707	0.0606616	-0.514429	0.0870471	0.716427	0.00875996	0.692887	0.0124885	0.843012	0.000573362	-0.418239	0.176045	-0.177541	0.580932
ENSMUSG00000033009	94037198	94067921	2-oxoglutarate and iron-dependent oxygenase domain containing 1 [Source:MGI Symbol;Acc:MGI:2442978]	Ogfod1	protein_coding	1	yellow	-0.326425	0.300415	0.168145	0.601413	0.477904	0.116088	-0.630809	0.0278519	-0.575687	0.0501454	0.483978	0.110868	-0.786663	0.00240205	0.0965649	0.76529	0.633586	0.026964	0.523358	0.0807816	-0.61963	0.0316392	0.83329	0.000761043	0.055144	0.864843	0.579662	0.0482172	-0.486968	0.108357	0.710944	0.00954208	0.463647	0.128968	0.763871	0.00382806	-0.511332	0.0892951	-0.430252	0.162677
ENSMUSG00000024294	10725548	10818704	mindbomb E3 ubiquitin protein ligase 1 [Source:MGI Symbol;Acc:MGI:2443157]	Mib1	protein_coding	1	yellow	0.237963	0.456409	0.513676	0.0875902	0.432596	0.160146	-0.113778	0.724777	-0.137842	0.669228	0.643055	0.024091	-0.443687	0.14851	0.0790702	0.807026	0.293391	0.354688	0.71735	0.00863319	-0.636353	0.0261003	0.521231	0.0822452	0.0564714	0.861617	0.74695	0.00524533	-0.689368	0.0131333	0.49321	0.103238	0.443497	0.148705	0.747895	0.00515709	-0.572002	0.0519804	-0.594317	0.0415596
ENSMUSG00000031755	94067954	94098928	Bardet-Biedl syndrome 2 (human) [Source:MGI Symbol;Acc:MGI:2135267]	Bbs2	protein_coding	-1	yellow	0.079506	0.805981	-0.552084	0.0627202	0.163668	0.611267	-0.594296	0.0415686	-0.160829	0.617545	0.277213	0.383037	-0.645544	0.0233741	-0.46329	0.129301	0.744446	0.00548468	0.535124	0.0730036	-0.342654	0.275572	0.698111	0.0115751	0.529215	0.0768422	-0.026927	0.933798	-0.365044	0.243305	0.419296	0.174842	0.587961	0.0443617	0.34374	0.273954	-0.100772	0.755334	0.440036	0.152279
ENSMUSG00000044150	159526688	159593081	Bclaf1 and Thrap3 family member 3 [Source:MGI Symbol;Acc:MGI:2685992]	Bclaf3	protein_coding	1	yellow	-0.143514	0.656342	-0.396114	0.202413	0.371421	0.234544	-0.679048	0.015166	-0.217711	0.496673	0.442801	0.149419	-0.488682	0.106936	0.0557946	0.863261	0.682793	0.0144034	0.363168	0.245919	-0.0406293	0.900233	0.650464	0.0220029	0.0898022	0.781362	0.147664	0.646968	-0.167326	0.60321	0.679886	0.0149929	0.366396	0.241432	0.462183	0.13034	-0.380356	0.222588	0.436405	0.156087
ENSMUSG00000034154	119373042	119477687	INO80 complex subunit [Source:MGI Symbol;Acc:MGI:1915392]	Ino80	protein_coding	-1	yellow	0.151676	0.637951	0.228646	0.474738	0.727723	0.00730065	-0.511888	0.0888891	-0.230462	0.471139	0.748205	0.00512837	-0.670851	0.0169388	0.0501309	0.877043	0.502183	0.0961648	0.83383	0.000749528	-0.594159	0.0416278	0.797206	0.00190024	0.150758	0.640009	0.458693	0.133652	-0.740031	0.00592668	0.615772	0.0330281	0.591886	0.042616	0.67358	0.0163326	-0.574069	0.0509454	-0.331495	0.292524
ENSMUSG00000046351	23353103	23369208	zinc finger protein 322A [Source:MGI Symbol;Acc:MGI:2442566]	Zfp322a	protein_coding	-1	yellow	-0.521665	0.0819447	0.0731865	0.821173	0.435604	0.156935	-0.574865	0.0505508	-0.658433	0.0199079	0.529706	0.076518	-0.702892	0.0107834	0.215491	0.501182	0.365113	0.243209	0.314399	0.319603	-0.463746	0.128875	0.59824	0.0398944	-0.210006	0.512398	0.143242	0.656959	-0.154362	0.631938	0.6806	0.0148465	0.406861	0.189321	0.503655	0.0950363	-0.316233	0.316635	-0.337985	0.282594
ENSMUSG00000044252	12755314	12941841	oxysterol binding protein-like 1A [Source:MGI Symbol;Acc:MGI:1927551]	Osbpl1a	protein_coding	-1	yellow	0.350405	0.264138	0.0903544	0.780046	0.256354	0.42124	-0.146458	0.649687	-0.0334944	0.917696	0.331034	0.293236	-0.446905	0.145239	-0.299991	0.343453	0.572672	0.0516433	0.67681	0.0156358	-0.411613	0.183703	0.596014	0.0408333	0.458764	0.133584	0.49308	0.103343	-0.727188	0.00736534	0.276724	0.383912	0.355995	0.256064	0.490947	0.105075	-0.387353	0.213487	0.0331751	0.918478
ENSMUSG00000019873	67009189	67096945	receptor accessory protein 3 [Source:MGI Symbol;Acc:MGI:88930]	Reep3	protein_coding	-1	yellow	-0.502164	0.0961793	0.15746	0.625028	0.600927	0.0387814	-0.678868	0.0152035	-0.760627	0.00407409	0.769029	0.00346024	-0.877003	0.000179703	0.283671	0.371583	0.555397	0.0608355	0.502898	0.0956151	-0.414309	0.180562	0.875844	0.000187947	-0.184752	0.565404	0.39795	0.200139	-0.412903	0.182196	0.921383	2.07038e-05	0.293529	0.354453	0.640432	0.0248635	-0.69012	0.0129935	-0.134969	0.675786
ENSMUSG00000018372	106789252	106819930	centrosomal protein 95 [Source:MGI Symbol;Acc:MGI:2443502]	Cep95	protein_coding	1	yellow	0.0215668	0.946958	0.137825	0.669265	0.169661	0.59809	-0.285932	0.367616	-0.497593	0.099741	0.551971	0.0627851	-0.849608	0.000468043	-0.333234	0.289844	0.467299	0.125584	0.743616	0.00556586	-0.900427	6.50848e-05	0.742172	0.00570914	0.348864	0.266389	0.545429	0.0666275	-0.635266	0.0264372	0.498036	0.0993922	0.603314	0.0378116	0.692606	0.0125392	-0.324842	0.302903	-0.404926	0.191638
ENSMUSG00000037971	50762828	50775520	RIKEN cDNA 1110032A03 gene [Source:MGI Symbol;Acc:MGI:1915971]	1110032A03Rik	protein_coding	-1	yellow	-0.108596	0.73691	-0.104098	0.747487	0.394764	0.204097	-0.695747	0.011982	-0.347946	0.267735	0.345017	0.272057	-0.767839	0.00354262	-0.238555	0.455256	0.726874	0.00740344	0.572109	0.0519266	-0.44063	0.151662	0.850338	0.000457396	0.367375	0.240081	0.32743	0.298841	-0.688933	0.0132146	0.548695	0.0646896	0.438893	0.153472	0.442258	0.149979	-0.502897	0.095616	0.0485929	0.880792
ENSMUSG00000020590	35047186	35147479	sorting nexin 13 [Source:MGI Symbol;Acc:MGI:2661416]	Snx13	protein_coding	1	yellow	-0.117702	0.715627	-0.315809	0.31732	0.520782	0.0825565	-0.844767	0.000543714	-0.202597	0.527719	0.378401	0.225172	-0.679481	0.0150764	-0.0849222	0.793008	0.798777	0.00183293	0.545757	0.0664307	-0.462836	0.129727	0.830416	0.000824715	0.264306	0.406459	0.238313	0.455727	-0.459513	0.132869	0.649829	0.0221766	0.701225	0.0110548	0.607021	0.0363396	-0.395404	0.203297	-0.0454933	0.888352
ENSMUSG00000064356	7766	7969	mitochondrially encoded ATP synthase 8 [Source:MGI Symbol;Acc:MGI:99926]	mt-Atp8	protein_coding	1	yellow	-0.320255	0.310177	-0.0338303	0.916873	0.533634	0.0739588	-0.737516	0.00619004	-0.605586	0.0369046	0.675977	0.0158133	-0.89082	0.000101451	0.0663021	0.837787	0.784121	0.00253687	0.627064	0.0290819	-0.503198	0.0953853	0.951016	2.04514e-06	0.067341	0.835276	0.457095	0.135186	-0.504237	0.0945926	0.89364	8.94457e-05	0.52172	0.0819071	0.765187	0.00373155	-0.606215	0.0366562	-0.0486276	0.880707
ENSMUSG00000030894	105744811	105752235	tripeptidyl peptidase I [Source:MGI Symbol;Acc:MGI:1336194]	Tpp1	protein_coding	-1	yellow	0.272135	0.392167	-0.478561	0.115516	0.16705	0.603817	-0.458406	0.133927	-0.149759	0.642254	0.282712	0.373272	-0.596197	0.0407557	-0.504513	0.0943824	0.664569	0.0183968	0.664573	0.018396	-0.400641	0.196833	0.714129	0.00908171	0.642277	0.0243181	0.304095	0.336565	-0.548924	0.0645548	0.267966	0.399746	0.574602	0.0506809	0.4124	0.182783	-0.173987	0.588646	0.405599	0.19083
ENSMUSG00000035967	56454857	56507843	integrator complex subunit 6 like [Source:MGI Symbol;Acc:MGI:2442593]	Ints6l	protein_coding	1	yellow	-0.430143	0.162796	-0.364602	0.24392	0.398423	0.199555	-0.693884	0.0123102	-0.539908	0.0699936	0.280756	0.376731	-0.68679	0.0136208	-0.0496256	0.878275	0.596507	0.0406241	0.285369	0.368603	-0.225696	0.480611	0.682576	0.0144468	0.107249	0.740074	-0.1151	0.721691	-0.190265	0.553647	0.493146	0.103289	0.378024	0.225672	0.253699	0.426231	-0.184082	0.56684	0.233764	0.464628
ENSMUSG00000019854	18055861	18125155	RalBP1 associated Eps domain containing protein [Source:MGI Symbol;Acc:MGI:1196373]	Reps1	protein_coding	1	yellow	-0.424531	0.16896	0.217124	0.497864	0.533374	0.0741261	-0.711337	0.00948428	-0.665046	0.0182831	0.602016	0.0383368	-0.753158	0.00468595	0.215556	0.50105	0.425262	0.168149	0.418288	0.175989	-0.351333	0.262787	0.729159	0.00712905	-0.127331	0.693323	0.323461	0.305084	-0.359873	0.250549	0.746048	0.00533065	0.259467	0.415421	0.504583	0.0943296	-0.504081	0.0947118	-0.219547	0.49296
ENSMUSG00000111027	75061354	75062047	predicted gene 2981 [Source:MGI Symbol;Acc:MGI:3781159]	Gm2981	processed_pseudogene	-1	yellow	-0.269117	0.397646	-0.136914	0.671344	0.713349	0.00919291	-0.901543	6.16372e-05	-0.396683	0.201707	0.562013	0.0571909	-0.583003	0.0466376	0.312007	0.323499	0.597305	0.0402869	0.458762	0.133586	-0.210344	0.511704	0.774458	0.00310281	-0.0725467	0.822714	0.40015	0.197433	-0.306233	0.333007	0.751294	0.00484895	0.486865	0.108444	0.632973	0.0271581	-0.521875	0.0818	-0.0276138	0.932113
ENSMUSG00000026383	119545037	119649000	erythrocyte membrane protein band 4.1 like 5 [Source:MGI Symbol;Acc:MGI:103006]	Epb41l5	protein_coding	-1	yellow	-0.689316	0.013143	0.224924	0.482154	0.412681	0.182454	-0.427294	0.165907	-0.90421	5.39796e-05	0.621217	0.0310803	-0.663334	0.018694	0.416576	0.177948	0.216317	0.499502	0.15822	0.623338	-0.0784483	0.808519	0.560379	0.0580768	-0.411742	0.183552	0.177897	0.580161	-0.0747765	0.817345	0.707557	0.0100504	-0.128902	0.689703	0.296916	0.348664	-0.497797	0.0995805	0.0489785	0.879852
ENSMUSG00000038344	162778919	162829454	taxilin gamma [Source:MGI Symbol;Acc:MGI:3590652]	Txlng	protein_coding	-1	yellow	0.0452537	0.888937	0.00343237	0.991553	0.453966	0.138224	-0.682734	0.0144151	-0.376192	0.228113	0.547535	0.0653731	-0.835897	0.000706636	-0.220014	0.492016	0.766364	0.00364677	0.818825	0.00112433	-0.686894	0.0136011	0.941623	4.83854e-06	0.394683	0.204197	0.693903	0.0123068	-0.811502	0.00135281	0.658528	0.0198838	0.692597	0.0125407	0.793149	0.00208273	-0.569426	0.0532907	-0.191151	0.551767
ENSMUSG00000040242	146577203	146599198	FGFR1 oncogene partner 2 [Source:MGI Symbol;Acc:MGI:1914779]	Fgfr1op2	protein_coding	1	yellow	-0.491684	0.104474	0.231304	0.469475	0.680912	0.0147828	-0.735578	0.00639908	-0.757964	0.00428484	0.756889	0.00437217	-0.859885	0.000334552	0.323855	0.30446	0.498244	0.0992285	0.513297	0.0878649	-0.410201	0.185362	0.877295	0.000177672	-0.196866	0.539703	0.452584	0.139579	-0.482458	0.11216	0.881732	0.000148935	0.285346	0.368642	0.614517	0.033489	-0.728506	0.00720676	-0.222333	0.487349
ENSMUSG00000025873	54621784	54664063	Fas associated factor family member 2 [Source:MGI Symbol;Acc:MGI:1923827]	Faf2	protein_coding	1	yellow	0.187953	0.558564	0.200219	0.532677	0.575595	0.0501906	-0.38401	0.217807	-0.372503	0.233076	0.828662	0.000865549	-0.658935	0.019781	-0.0219914	0.945916	0.459651	0.132738	0.842483	0.000582548	-0.345506	0.271333	0.746673	0.00527146	0.167952	0.601836	0.487168	0.108191	-0.725927	0.00751952	0.60003	0.0391506	0.382444	0.219849	0.56038	0.0580762	-0.582432	0.0469051	0.120049	0.710172
ENSMUSG00000006906	83543211	83572729	STAM binding protein [Source:MGI Symbol;Acc:MGI:1917777]	Stambp	protein_coding	-1	yellow	-0.398399	0.199585	0.142267	0.659167	0.304815	0.335365	-0.470665	0.122516	-0.534338	0.0735061	0.221908	0.488201	-0.570345	0.0528206	0.111539	0.730011	0.510666	0.0897843	0.270775	0.394632	-0.417196	0.177237	0.597579	0.0401714	-0.00352931	0.991315	0.481734	0.112778	-0.30871	0.32891	0.499898	0.097934	0.276891	0.383613	0.569925	0.0530352	-0.357305	0.254193	-0.348174	0.267401
ENSMUSG00000037287	42412316	42507809	tubulin folding cofactor E-like [Source:MGI Symbol;Acc:MGI:1925543]	Tbcel	protein_coding	-1	yellow	-0.0153916	0.962134	-0.38871	0.211748	0.159145	0.621282	-0.443329	0.148877	-0.0504224	0.876333	0.0295719	0.92731	-0.394554	0.204359	-0.27901	0.379832	0.584629	0.0458823	0.272463	0.391575	-0.101571	0.753446	0.532319	0.0748092	0.382713	0.219497	0.0848237	0.793244	-0.426259	0.167046	0.239066	0.454262	0.230711	0.470647	0.121299	0.707271	-0.314571	0.319325	0.400272	0.197285
ENSMUSG00000023235	4325210	4360020	chemokine (C-C motif) ligand 25 [Source:MGI Symbol;Acc:MGI:1099448]	Ccl25	protein_coding	1	yellow	0.0774708	0.810867	-0.248345	0.436388	0.231975	0.468151	-0.43934	0.153004	-0.213191	0.505873	0.514066	0.0873091	-0.474227	0.119325	-0.0818907	0.800263	0.492987	0.103418	0.495546	0.101364	-0.191809	0.550372	0.574749	0.0506081	0.193102	0.547635	0.328238	0.297579	-0.272858	0.39086	0.54039	0.0696947	0.364097	0.244623	0.485516	0.109572	-0.330685	0.293777	0.327157	0.299268
ENSMUSG00000090737	28763161	28763430	predicted gene 6788 [Source:MGI Symbol;Acc:MGI:3646480]	Gm6788	processed_pseudogene	-1	yellow	-0.615439	0.0331499	0.395979	0.202582	0.628567	0.0285837	-0.607003	0.0363465	-0.845815	0.000526575	0.722264	0.00798105	-0.792802	0.00209895	0.445311	0.146853	0.344656	0.272592	0.385257	0.216189	-0.388692	0.211771	0.754786	0.00454699	-0.359934	0.250463	0.484367	0.11054	-0.392973	0.206343	0.843892	0.000558353	0.149916	0.641901	0.577389	0.0493133	-0.72547	0.00757588	-0.37497	0.22975
ENSMUSG00000044950	43681998	43721491	PWWP domain containing 2A [Source:MGI Symbol;Acc:MGI:1918052]	Pwwp2a	protein_coding	1	yellow	0.0326319	0.919809	-0.084202	0.794731	0.436615	0.155865	-0.697223	0.0117267	-0.37094	0.235198	0.476842	0.117017	-0.780289	0.002751	-0.215635	0.500888	0.81576	0.00121602	0.762811	0.00390716	-0.53776	0.0713338	0.928194	1.33158e-05	0.41206	0.18318	0.680318	0.0149041	-0.771555	0.00329029	0.624653	0.0298943	0.620134	0.031461	0.741658	0.00576079	-0.555142	0.0609795	-0.00203855	0.994983
ENSMUSG00000044952	97332327	97350213	potassium channel tetramerisation domain containing 21 [Source:MGI Symbol;Acc:MGI:3643121]	Kctd21	protein_coding	1	yellow	0.214379	0.503448	-0.303333	0.337839	0.270397	0.395317	-0.411087	0.184319	-0.097018	0.764216	0.390871	0.208997	-0.456533	0.135728	-0.191462	0.551108	0.495001	0.1018	0.577813	0.0491078	-0.375592	0.228917	0.609566	0.0353531	0.360683	0.249406	0.434427	0.158187	-0.425346	0.168056	0.361998	0.247558	0.51688	0.0852957	0.514039	0.0873282	-0.299721	0.34391	0.146166	0.650345
ENSMUSG00000020184	117688875	117710758	transformed mouse 3T3 cell double minute 2 [Source:MGI Symbol;Acc:MGI:96952]	Mdm2	protein_coding	-1	yellow	-0.100685	0.75554	-0.141683	0.660492	0.500712	0.0973009	-0.739785	0.00595202	-0.279787	0.378451	0.362154	0.247338	-0.62511	0.029739	-0.00423188	0.989586	0.769546	0.00342495	0.583101	0.0465921	-0.549592	0.064164	0.799196	0.00181529	0.22114	0.489747	0.598988	0.0395823	-0.509839	0.0903934	0.616915	0.0326121	0.732607	0.00672961	0.812754	0.00131142	-0.429928	0.163029	-0.268856	0.398122
ENSMUSG00000054277	83299739	83350247	ADP-ribosylation factor GTPase activating protein 3 [Source:MGI Symbol;Acc:MGI:1913501]	Arfgap3	protein_coding	-1	yellow	0.150802	0.63991	-0.131731	0.683204	0.0223628	0.945003	-0.366297	0.241569	-0.0389164	0.904422	0.140243	0.663763	-0.430126	0.162814	-0.361364	0.248448	0.71013	0.00966247	0.461399	0.13108	-0.232762	0.466599	0.57035	0.0528183	0.45748	0.134816	0.529551	0.0766207	-0.63563	0.026324	0.392676	0.206716	0.313221	0.321518	0.43992	0.152399	-0.466999	0.125859	0.266111	0.403142
ENSMUSG00000080316	17827158	17843009	sperm acrosome associated 6 [Source:MGI Symbol;Acc:MGI:1922452]	Spaca6	protein_coding	1	yellow	-0.0454632	0.888426	0.232258	0.467593	0.450021	0.142116	-0.344513	0.272805	-0.422325	0.171423	0.491116	0.104937	-0.529644	0.076559	0.030898	0.924059	0.0127395	0.968656	0.507193	0.0923607	-0.4306	0.1623	0.518296	0.0842946	0.0484902	0.881042	0.493587	0.102934	-0.662771	0.0188306	0.2584	0.417412	0.241193	0.450135	0.234785	0.462623	-0.545949	0.0663158	-0.282253	0.374083
ENSMUSG00000015305	8722219	8886070	SAM and SH3 domain containing 1 [Source:MGI Symbol;Acc:MGI:1917347]	Sash1	protein_coding	-1	yellow	0.122988	0.703357	-0.16921	0.599077	0.359628	0.250896	-0.622466	0.0306453	-0.351078	0.263159	0.514068	0.0873077	-0.86782	0.000253465	-0.392027	0.207534	0.774586	0.00309478	0.846481	0.000515912	-0.729462	0.0070933	0.933534	9.13105e-06	0.532347	0.0747905	0.515463	0.0863052	-0.751969	0.00478946	0.563634	0.0563217	0.750999	0.00487508	0.713438	0.00918007	-0.393302	0.205928	-0.0527001	0.870787
ENSMUSG00000014361	128698956	128802894	MER proto-oncogene tyrosine kinase [Source:MGI Symbol;Acc:MGI:96965]	Mertk	protein_coding	1	yellow	-0.290525	0.359628	0.389989	0.210117	-0.103353	0.749243	0.0379825	0.906707	-0.702806	0.0107973	0.416353	0.178203	-0.709863	0.00970225	-0.169464	0.59852	0.206407	0.519816	0.359167	0.251549	-0.680242	0.0149196	0.446881	0.145263	0.0437052	0.892718	0.382306	0.220029	-0.298403	0.34614	0.428095	0.165028	0.130212	0.68669	0.467502	0.125397	-0.21449	0.503222	-0.416115	0.178477
ENSMUSG00000041997	70712407	70825728	tousled-like kinase 1 [Source:MGI Symbol;Acc:MGI:2441683]	Tlk1	protein_coding	-1	yellow	-0.327288	0.299064	0.0688521	0.831626	0.611694	0.034543	-0.752444	0.00474789	-0.693248	0.0124237	0.73204	0.00679407	-0.938762	6.1166e-06	0.0704729	0.827714	0.63143	0.0276514	0.665912	0.0180778	-0.52847	0.077336	0.951559	1.93608e-06	0.0467117	0.885379	0.430667	0.162227	-0.597644	0.040144	0.826636	0.000914658	0.480069	0.114209	0.650532	0.0219845	-0.629595	0.0282464	-0.113625	0.725134
ENSMUSG00000003031	134920401	134925513	cyclin-dependent kinase inhibitor 1B [Source:MGI Symbol;Acc:MGI:104565]	Cdkn1b	protein_coding	1	yellow	-0.0200523	0.950679	-0.273351	0.38997	0.340097	0.279406	-0.62841	0.0286354	-0.314617	0.319249	0.399563	0.198154	-0.767324	0.0035787	-0.247683	0.437651	0.868619	0.000246248	0.666782	0.0178731	-0.634472	0.0266853	0.882113	0.000146648	0.416523	0.178009	0.442211	0.150026	-0.499032	0.0986099	0.613183	0.0339845	0.717208	0.00865256	0.776718	0.00296261	-0.314616	0.319252	-0.0497357	0.878006
ENSMUSG00000040732	95359169	95586593	ETS transcription factor [Source:MGI Symbol;Acc:MGI:95415]	Erg	protein_coding	-1	yellow	-0.547731	0.065257	0.0642652	0.842715	0.363647	0.245251	-0.40099	0.196407	-0.739228	0.00600981	0.463974	0.128662	-0.635883	0.0262456	0.259948	0.414528	0.393338	0.205883	0.223207	0.485592	-0.196292	0.540909	0.616325	0.0328264	-0.197851	0.537636	0.274507	0.387889	-0.169275	0.598936	0.610437	0.0350199	0.0364027	0.910573	0.398528	0.199426	-0.453667	0.138516	0.0347438	0.914635
ENSMUSG00000034329	86058138	86201193	BRCA1 interacting protein C-terminal helicase 1 [Source:MGI Symbol;Acc:MGI:2442836]	Brip1	protein_coding	-1	yellow	-0.183921	0.567185	0.242548	0.447515	0.91917	2.36962e-05	-0.686743	0.01363	-0.433248	0.159446	0.761013	0.0040442	-0.644083	0.0237929	0.357177	0.254376	0.469757	0.123339	0.631928	0.0274916	-0.259131	0.416048	0.795874	0.00195875	-0.14229	0.659116	0.351136	0.263073	-0.631734	0.0275538	0.719315	0.00836781	0.356651	0.255127	0.515137	0.0865391	-0.728518	0.00720528	-0.139366	0.665757
ENSMUSG00000028999	23787711	23820369	RAD50 interactor 1 [Source:MGI Symbol;Acc:MGI:1916233]	Rint1	protein_coding	1	yellow	0.302632	0.339012	-0.127481	0.692976	0.300347	0.342853	-0.551545	0.0630305	-0.233647	0.464859	0.44439	0.147792	-0.713668	0.00914731	-0.432309	0.160454	0.599292	0.0394559	0.852574	0.0004259	-0.729766	0.00705751	0.784081	0.00253904	0.583535	0.0463899	0.604991	0.0371406	-0.731361	0.00687191	0.381537	0.221036	0.790354	0.00221607	0.686286	0.0137178	-0.257904	0.418338	-0.155923	0.628452
ENSMUSG00000028780	17574281	17730268	sema domain, immunoglobulin domain (Ig), short basic domain, secreted, (semaphorin) 3C [Source:MGI Symbol;Acc:MGI:107557]	Sema3c	protein_coding	1	yellow	-0.399747	0.197927	-0.0484695	0.881092	0.329387	0.29579	-0.585799	0.0453444	-0.434975	0.157603	0.457183	0.135101	-0.690477	0.0129276	0.0533445	0.869219	0.674105	0.0162177	0.309836	0.327055	-0.170927	0.595321	0.722119	0.00799979	-0.00948071	0.976671	0.126031	0.69632	-0.366703	0.241008	0.78477	0.0025019	0.141617	0.660642	0.374158	0.230841	-0.610674	0.0349296	0.220602	0.490831
ENSMUSG00000064372	15356	15422	mitochondrially encoded tRNA proline [Source:MGI Symbol;Acc:MGI:102478]	mt-Tp	Mt_tRNA	-1	yellow	-0.462601	0.129948	0.0228391	0.943833	0.437745	0.154674	-0.640679	0.0247899	-0.663209	0.0187243	0.64325	0.024034	-0.803629	0.00163662	0.129722	0.687818	0.593541	0.041895	0.406352	0.189928	-0.202568	0.527779	0.783654	0.00256229	-0.0924702	0.775011	0.181045	0.573365	-0.371627	0.234264	0.847254	0.000503746	0.170817	0.59556	0.424302	0.169215	-0.61383	0.0337435	0.207721	0.517101
ENSMUSG00000005871	34220924	34322552	APC, WNT signaling pathway regulator [Source:MGI Symbol;Acc:MGI:88039]	Apc	protein_coding	1	yellow	-0.307803	0.330407	0.180833	0.573821	0.822382	0.00102469	-0.692397	0.0125769	-0.395098	0.203679	0.658261	0.0199513	-0.534362	0.0734911	0.454727	0.137481	0.577515	0.0492521	0.449193	0.142941	-0.0836543	0.796041	0.709284	0.00978885	-0.250888	0.431549	0.278667	0.380441	-0.399845	0.197808	0.806161	0.00154079	0.273807	0.389148	0.549852	0.0640124	-0.66802	0.0175848	-0.0324576	0.920236
ENSMUSG00000026349	127774164	127808061	cyclin T2 [Source:MGI Symbol;Acc:MGI:1920199]	Ccnt2	protein_coding	1	yellow	0.139025	0.666534	-0.145274	0.65236	0.16323	0.612234	-0.392559	0.206863	-0.292236	0.356674	0.385276	0.216164	-0.762801	0.00390787	-0.462343	0.13019	0.608213	0.0358753	0.747565	0.00518778	-0.883474	0.000138706	0.724529	0.00769325	0.512007	0.0888025	0.432465	0.160288	-0.597004	0.0404137	0.397618	0.200549	0.824982	0.000956302	0.690977	0.0128355	-0.160037	0.619302	-0.303784	0.337085
ENSMUSG00000058056	61511433	61902690	palladin, cytoskeletal associated protein [Source:MGI Symbol;Acc:MGI:1919583]	Palld	protein_coding	-1	yellow	0.107769	0.738852	-0.153886	0.633001	0.334674	0.287635	-0.524083	0.0802862	-0.441098	0.151176	0.453866	0.138322	-0.815611	0.00122061	-0.392001	0.207567	0.659024	0.0197584	0.800285	0.0017701	-0.613698	0.0337925	0.875418	0.000191049	0.528865	0.0770736	0.556401	0.0602724	-0.784253	0.00252975	0.414003	0.180917	0.604553	0.037315	0.575402	0.0502858	-0.393545	0.205623	0.0737895	0.819721
ENSMUSG00000050619	121158273	121171125	zinc finger SCAN domains 29 [Source:MGI Symbol;Acc:MGI:2139317]	Zscan29	protein_coding	-1	yellow	-0.240592	0.4513	0.0880462	0.785548	0.341399	0.27745	-0.523884	0.080422	-0.625271	0.0296847	0.667859	0.0176223	-0.882465	0.000144562	-0.0282789	0.930481	0.68601	0.0137711	0.633221	0.0270795	-0.644083	0.0237931	0.861638	0.000315112	0.112772	0.727128	0.501302	0.0968447	-0.418927	0.175261	0.823302	0.00100006	0.489867	0.105959	0.822213	0.00102928	-0.447229	0.144913	-0.200978	0.531092
ENSMUSG00000021188	101834043	101913267	thyroid hormone receptor interactor 11 [Source:MGI Symbol;Acc:MGI:1924393]	Trip11	protein_coding	-1	yellow	-0.260718	0.413096	0.161333	0.616429	0.523223	0.0808738	-0.563322	0.0564885	-0.738335	0.00610332	0.802509	0.0016804	-0.882726	0.00014303	0.0867176	0.788719	0.503569	0.0951017	0.681254	0.0147133	-0.47117	0.12206	0.878144	0.000171864	0.00988337	0.975681	0.570559	0.052712	-0.614845	0.0333681	0.781547	0.00267923	0.348284	0.267239	0.636416	0.0260807	-0.683334	0.0142955	-0.0334769	0.917738
ENSMUSG00000027663	32334792	32366014	zinc finger matrin type 3 [Source:MGI Symbol;Acc:MGI:1195270]	Zmat3	protein_coding	-1	yellow	-0.068636	0.832148	0.133188	0.679863	0.42952	0.163473	-0.549591	0.0641646	-0.542873	0.0681714	0.673803	0.0162837	-0.765557	0.00370474	-0.0352441	0.91341	0.501481	0.0967056	0.665542	0.0181651	-0.375438	0.229123	0.81945	0.00110629	0.168859	0.599847	0.581524	0.0473326	-0.640785	0.0247585	0.657853	0.0200552	0.274164	0.388506	0.55314	0.0621155	-0.619963	0.0315213	0.0717688	0.824589
ENSMUSG00000032827	4902917	5165661	protein phosphatase 1, regulatory subunit 9A [Source:MGI Symbol;Acc:MGI:2442401]	Ppp1r9a	protein_coding	1	yellow	0.208257	0.515996	0.0370149	0.909075	-0.124108	0.700764	0.104614	0.74627	-0.200663	0.531751	0.216982	0.498153	-0.437959	0.15445	-0.458209	0.134116	0.396736	0.201641	0.481957	0.112588	-0.521618	0.0819778	0.320556	0.309697	0.405388	0.191083	0.103896	0.747963	-0.263317	0.408283	0.149239	0.643423	0.387216	0.213662	0.400356	0.197181	0.167043	0.603832	-0.0575554	0.858983
ENSMUSG00000047694	98936316	98949017	Yip1 domain family, member 6 [Source:MGI Symbol;Acc:MGI:1925179]	Yipf6	protein_coding	1	yellow	-0.529999	0.0763249	0.14364	0.656056	0.54785	0.0651868	-0.682438	0.0144743	-0.779175	0.00281571	0.674874	0.0160508	-0.876654	0.000182157	0.223962	0.484079	0.62471	0.0298751	0.483709	0.111096	-0.426602	0.166668	0.861859	0.000312725	-0.141657	0.660551	0.403407	0.19347	-0.418751	0.175462	0.889815	0.000106021	0.338569	0.281711	0.65951	0.0196364	-0.627138	0.0290572	-0.145743	0.651302
ENSMUSG00000021668	96480690	96542579	polymerase (DNA directed), kappa [Source:MGI Symbol;Acc:MGI:1349767]	Polk	protein_coding	-1	yellow	-0.588461	0.0441363	0.252442	0.428606	0.369013	0.23783	-0.437199	0.155249	-0.671989	0.016684	0.421373	0.172493	-0.591824	0.0426432	0.366153	0.241767	0.355421	0.256888	0.155688	0.628977	-0.338989	0.281076	0.55662	0.0601503	-0.292929	0.355482	0.315681	0.317526	-0.0577989	0.858392	0.666145	0.0180228	0.0918357	0.77652	0.536521	0.0721152	-0.382458	0.219829	-0.380543	0.222341
ENSMUSG00000022961	91647506	91679221	Son DNA binding protein [Source:MGI Symbol;Acc:MGI:98353]	Son	protein_coding	1	yellow	-0.101198	0.754328	-0.0654996	0.839728	0.446225	0.145926	-0.592664	0.0422759	-0.453121	0.139052	0.681517	0.01466	-0.816584	0.00119082	-0.0576509	0.858752	0.628469	0.0286159	0.700958	0.0110987	-0.649336	0.0223121	0.842684	0.000579048	0.165603	0.607	0.437287	0.155156	-0.49345	0.103045	0.742126	0.00571374	0.651251	0.0217892	0.752751	0.00472115	-0.457365	0.134926	-0.170908	0.595362
ENSMUSG00000049550	123577795	123684618	CAP-GLY domain containing linker protein 1 [Source:MGI Symbol;Acc:MGI:1928401]	Clip1	protein_coding	-1	yellow	-0.050827	0.875348	-0.0691584	0.830886	0.348049	0.267584	-0.501133	0.096975	-0.629245	0.0283608	0.648978	0.0224109	-0.932716	9.69371e-06	-0.292422	0.356354	0.5681	0.0539747	0.776781	0.00295878	-0.634116	0.026797	0.88228	0.000145656	0.35491	0.25762	0.392859	0.206486	-0.642574	0.0242313	0.563999	0.056127	0.526884	0.0783937	0.556673	0.0601206	-0.382639	0.219593	0.0585699	0.85652
ENSMUSG00000024127	85063470	85090241	prolyl endopeptidase-like [Source:MGI Symbol;Acc:MGI:2441932]	Prepl	protein_coding	-1	yellow	-0.0172013	0.957685	-0.112471	0.727831	0.525477	0.079341	-0.742165	0.00570981	-0.398354	0.199641	0.478755	0.115347	-0.813239	0.00129563	-0.168792	0.599994	0.721355	0.00809875	0.747715	0.0051738	-0.699866	0.0112796	0.920611	2.17121e-05	0.372015	0.233737	0.531701	0.0752107	-0.635315	0.0264217	0.574038	0.050961	0.746449	0.00529258	0.752326	0.00475818	-0.377384	0.226523	-0.253112	0.427339
ENSMUSG00000117285	78750995	78751496	predicted gene, 49863 [Source:MGI Symbol;Acc:MGI:6270537]	Gm49863	processed_pseudogene	1	yellow	0.0842173	0.794694	0.073893	0.819471	0.165458	0.607319	-0.39843	0.199547	-0.33949	0.280321	0.393298	0.205934	-0.823451	0.000996142	-0.443147	0.149064	0.637885	0.0256306	0.730662	0.00695282	-0.828094	0.000879114	0.791657	0.00215312	0.498987	0.0986452	0.518138	0.0844057	-0.754684	0.00455567	0.472279	0.121064	0.598648	0.0397241	0.639601	0.0251119	-0.367026	0.240562	-0.305492	0.334237
ENSMUSG00000092260	69741639	69749970	zinc finger protein 963 [Source:MGI Symbol;Acc:MGI:4867078]	Zfp963	protein_coding	-1	yellow	-0.0634106	0.844784	-0.0677147	0.834373	0.459694	0.132697	-0.678751	0.0152278	-0.333266	0.289795	0.315016	0.318603	-0.700783	0.0111276	-0.208128	0.516263	0.562479	0.05694	0.609074	0.0355426	-0.599952	0.0391828	0.752274	0.00476269	0.331698	0.29221	0.397642	0.200519	-0.696212	0.0119012	0.40718	0.188941	0.651982	0.021592	0.4887	0.10692	-0.385924	0.215327	-0.261017	0.412542
ENSMUSG00000039178	53809606	53903965	TBC1 domain family, member 19 [Source:MGI Symbol;Acc:MGI:1914499]	Tbc1d19	protein_coding	1	yellow	0.362744	0.246512	-0.339604	0.280149	0.23339	0.465365	-0.528684	0.0771939	-0.115504	0.720747	0.168529	0.600571	-0.582541	0.0468539	-0.555894	0.0605567	0.640829	0.0247455	0.759316	0.0041768	-0.617942	0.0322416	0.714574	0.00901864	0.739463	0.00598536	0.5312	0.0755374	-0.71464	0.00900944	0.138237	0.668327	0.788637	0.00230116	0.541386	0.0690808	-0.111671	0.729704	0.0100769	0.975205
ENSMUSG00000030557	67231163	67372858	myocyte enhancer factor 2A [Source:MGI Symbol;Acc:MGI:99532]	Mef2a	protein_coding	-1	yellow	-0.37486	0.229898	-0.0498402	0.877752	0.640848	0.0247397	-0.837934	0.000666271	-0.509823	0.0904046	0.584766	0.0458193	-0.805385	0.00156969	0.164828	0.608708	0.74126	0.00580105	0.519304	0.0835869	-0.406772	0.189427	0.909854	4.02328e-05	9.80484e-05	0.999759	0.340593	0.278659	-0.473288	0.120161	0.851433	0.000441754	0.477997	0.116007	0.647493	0.0228238	-0.626611	0.0292332	-0.0934077	0.772783
ENSMUSG00000025006	40294753	40513779	sorbin and SH3 domain containing 1 [Source:MGI Symbol;Acc:MGI:700014]	Sorbs1	protein_coding	-1	yellow	0.214385	0.503435	-0.100606	0.755725	-0.00153215	0.996229	-0.104952	0.745475	-0.399291	0.198487	0.409782	0.185855	-0.676793	0.0156394	-0.545281	0.066716	0.309654	0.327355	0.68295	0.014372	-0.585702	0.0453889	0.572947	0.0515054	0.520559	0.0827112	0.36634	0.241509	-0.639383	0.0251774	0.173183	0.590397	0.40754	0.188512	0.306613	0.332377	-0.194203	0.545311	0.146649	0.649257
ENSMUSG00000039285	118040499	118069794	5-azacytidine induced gene 2 [Source:MGI Symbol;Acc:MGI:1351332]	Azi2	protein_coding	1	yellow	-0.150323	0.640985	0.376534	0.227656	0.739852	0.00594516	-0.591781	0.0426619	-0.318909	0.312329	0.699211	0.0113893	-0.532161	0.0749114	0.409893	0.185724	0.497774	0.0995981	0.535591	0.0727058	-0.33066	0.293815	0.680421	0.0148831	-0.193882	0.545989	0.451041	0.141103	-0.396746	0.201629	0.796492	0.00193141	0.350067	0.26463	0.730252	0.00700059	-0.585738	0.0453721	-0.393043	0.206254
ENSMUSG00000069769	88339382	88718513	musashi RNA-binding protein 2 [Source:MGI Symbol;Acc:MGI:1923876]	Msi2	protein_coding	-1	yellow	0.349097	0.266048	-0.326752	0.299903	0.111718	0.729593	-0.444962	0.147209	-0.172119	0.592718	0.268735	0.398343	-0.717191	0.00865496	-0.65489	0.0208204	0.75855	0.00423777	0.818496	0.00113389	-0.722491	0.00795182	0.788081	0.00232924	0.781716	0.00266968	0.488833	0.10681	-0.703269	0.0107228	0.280593	0.37702	0.785882	0.00244286	0.630543	0.0279377	-0.122516	0.704449	0.0622166	0.847676
ENSMUSG00000029563	14901349	15441977	forkhead box P2 [Source:MGI Symbol;Acc:MGI:2148705]	Foxp2	protein_coding	1	yellow	0.334725	0.287558	-0.163601	0.611414	0.22425	0.483503	-0.540159	0.0698382	-0.0679813	0.833729	0.206733	0.519143	-0.617385	0.0324421	-0.514752	0.0868152	0.727261	0.00735641	0.758697	0.00422596	-0.631399	0.0276614	0.767294	0.00358081	0.698891	0.0114432	0.630038	0.0281017	-0.824037	0.000980737	0.292561	0.356116	0.695591	0.0120094	0.608939	0.0355944	-0.316991	0.315411	-0.0759652	0.814485
ENSMUSG00000099342	86014403	86015886	predicted gene, 18180 [Source:MGI Symbol;Acc:MGI:5010365]	Gm18180	processed_pseudogene	-1	yellow	-0.213154	0.505946	-0.122219	0.705136	0.385469	0.215914	-0.624025	0.0301085	-0.595833	0.0409102	0.645036	0.0235191	-0.80499	0.00158455	-0.0626291	0.846677	0.604888	0.0371816	0.586946	0.0448208	-0.386298	0.214844	0.786925	0.00238845	0.125888	0.696652	0.261553	0.411546	-0.36657	0.241191	0.717254	0.00864623	0.459826	0.132571	0.565436	0.0553663	-0.362622	0.246683	0.157914	0.624019
ENSMUSG00000041684	44118957	44144770	basic, immunoglobulin-like variable motif containing [Source:MGI Symbol;Acc:MGI:2179809]	Bivm	protein_coding	1	yellow	-0.146964	0.648546	0.322981	0.305843	0.734822	0.00648192	-0.594916	0.0413022	-0.354517	0.258186	0.634283	0.0267447	-0.656247	0.0204673	0.229373	0.473295	0.610775	0.0348915	0.62862	0.0285661	-0.446656	0.14549	0.787952	0.00233579	-0.0357607	0.912145	0.45912	0.133244	-0.637943	0.025613	0.739415	0.00599036	0.4339	0.158749	0.686278	0.0137194	-0.659587	0.019617	-0.357756	0.253552
ENSMUSG00000041836	135537481	135686293	protein tyrosine phosphatase, receptor type, E [Source:MGI Symbol;Acc:MGI:97813]	Ptpre	protein_coding	1	yellow	-0.105332	0.74458	0.294817	0.352245	0.604807	0.0372138	-0.453263	0.138912	-0.166218	0.605646	0.421339	0.172531	-0.490667	0.105304	0.127579	0.69275	0.429021	0.164017	0.455519	0.13671	-0.310661	0.325702	0.590255	0.0433351	-0.00480688	0.988171	0.234106	0.463957	-0.665506	0.0181738	0.50314	0.0954298	0.259356	0.415628	0.330516	0.294038	-0.638052	0.0255797	-0.270163	0.395743
ENSMUSG00000100862	24613974	24614651	predicted gene 10925 [Source:MGI Symbol;Acc:MGI:3809095]	Gm10925	unprocessed_pseudogene	-1	yellow	-0.513971	0.0873777	0.120177	0.709873	0.603857	0.0375933	-0.71678	0.00871127	-0.766481	0.00363842	0.719438	0.00835145	-0.894369	8.65313e-05	0.235836	0.460564	0.618181	0.0321559	0.504556	0.0943502	-0.389796	0.210363	0.898454	7.15494e-05	-0.13744	0.670144	0.363234	0.245827	-0.449171	0.142963	0.904471	5.32711e-05	0.306693	0.332243	0.612371	0.0342883	-0.676901	0.0156165	-0.074051	0.819091
ENSMUSG00000028483	83417724	83467676	small nuclear RNA activating complex, polypeptide 3 [Source:MGI Symbol;Acc:MGI:1916338]	Snapc3	protein_coding	1	yellow	-0.210045	0.512317	-0.144709	0.653638	0.355905	0.256193	-0.503293	0.0953126	-0.631368	0.0276713	0.674539	0.0161233	-0.803154	0.00165508	-0.0893644	0.782405	0.496214	0.100832	0.581284	0.0474458	-0.358075	0.253098	0.749397	0.00501919	0.112904	0.726819	0.204255	0.524274	-0.401371	0.195942	0.642624	0.0242167	0.381738	0.220772	0.437315	0.155127	-0.396474	0.201966	0.261253	0.412103
ENSMUSG00000004364	80264923	80340480	cullin 3 [Source:MGI Symbol;Acc:MGI:1347360]	Cul3	protein_coding	-1	yellow	-0.0275479	0.932275	0.0510519	0.8748	0.504322	0.0945277	-0.683195	0.0143232	-0.454829	0.137381	0.587979	0.0443532	-0.87812	0.000172022	-0.151762	0.637757	0.710108	0.00966579	0.800971	0.00174205	-0.757822	0.00429625	0.951728	1.90319e-06	0.327082	0.299386	0.636169	0.0261569	-0.727535	0.00732324	0.672983	0.0164638	0.691007	0.01283	0.811291	0.00135989	-0.510506	0.0899013	-0.322884	0.305997
ENSMUSG00000064357	7927	8607	mitochondrially encoded ATP synthase 6 [Source:MGI Symbol;Acc:MGI:99927]	mt-Atp6	protein_coding	1	yellow	-0.517483	0.0848687	0.123048	0.703216	0.604622	0.0372873	-0.715939	0.00882754	-0.768935	0.00346673	0.719016	0.00840771	-0.893672	8.93148e-05	0.238807	0.454766	0.614491	0.0334987	0.501548	0.0966546	-0.387889	0.212799	0.896644	7.79131e-05	-0.141098	0.66182	0.361262	0.248591	-0.447566	0.144573	0.903559	5.57746e-05	0.302693	0.33891	0.609138	0.0355178	-0.677195	0.0155543	-0.0755493	0.815486
ENSMUSG00000061755	41787538	41844315	biorientation of chromosomes in cell division 1-like [Source:MGI Symbol;Acc:MGI:2444804]	Bod1l	protein_coding	-1	yellow	0.168649	0.600307	0.0562833	0.862074	0.734104	0.00656145	-0.596339	0.0406954	-0.24129	0.449947	0.775691	0.00302571	-0.644442	0.0236896	0.0313187	0.923027	0.583458	0.0464257	0.826189	0.000925764	-0.298609	0.34579	0.82744	0.000894925	0.183324	0.568465	0.408715	0.187117	-0.754177	0.0045986	0.647707	0.022764	0.47565	0.118065	0.551085	0.0632963	-0.651178	0.0218091	0.143876	0.655523
ENSMUSG00000026510	182409172	182462432	transformation related protein 53 binding protein 2 [Source:MGI Symbol;Acc:MGI:2138319]	Trp53bp2	protein_coding	1	yellow	0.0484277	0.881194	-0.409692	0.185962	0.221532	0.488957	-0.536981	0.0718247	-0.326936	0.299615	0.340278	0.279133	-0.769564	0.00342375	-0.429737	0.163237	0.858584	0.000349575	0.690168	0.0129845	-0.603603	0.0376954	0.838417	0.000656956	0.543487	0.0677979	0.340332	0.279052	-0.522101	0.081644	0.481927	0.112614	0.737264	0.00621694	0.65592	0.0205521	-0.199393	0.534405	0.161794	0.615409
ENSMUSG00000036087	72914304	72978829	SLAIN motif family, member 2 [Source:MGI Symbol;Acc:MGI:1923241]	Slain2	protein_coding	1	yellow	0.0990883	0.759314	0.0240489	0.940863	0.402817	0.194185	-0.56663	0.0547395	-0.438386	0.154002	0.537525	0.071482	-0.851844	0.000435993	-0.313577	0.32094	0.644426	0.0236941	0.858069	0.000355656	-0.754024	0.00461161	0.900439	6.50492e-05	0.455554	0.136677	0.68295	0.014372	-0.851469	0.000441241	0.516419	0.0856231	0.687917	0.0134061	0.715244	0.00892453	-0.481442	0.113029	-0.209481	0.513477
ENSMUSG00000110569	71704205	71704968	predicted gene, 18860 [Source:MGI Symbol;Acc:MGI:5011045]	Gm18860	processed_pseudogene	-1	yellow	-0.295302	0.351416	-0.046739	0.885313	0.247851	0.43733	-0.359422	0.251188	-0.557685	0.0595576	0.573282	0.0513377	-0.795737	0.00196486	-0.0947643	0.769561	0.488637	0.106973	0.444029	0.14816	-0.408474	0.187402	0.712864	0.00926254	0.0794131	0.806203	0.0925295	0.77487	-0.377838	0.225919	0.644435	0.0236916	0.20705	0.518487	0.35079	0.263578	-0.458116	0.134205	0.140982	0.662084
ENSMUSG00000037029	30161269	30169750	zinc finger protein 146 [Source:MGI Symbol;Acc:MGI:1347092]	Zfp146	protein_coding	-1	yellow	0.00111233	0.997263	-0.238602	0.455165	0.488291	0.107259	-0.817278	0.0011699	-0.276176	0.384892	0.342506	0.275793	-0.663711	0.018603	-0.182594	0.570033	0.791962	0.00213861	0.620423	0.0313588	-0.304107	0.336545	0.856377	0.000376248	0.401079	0.196299	0.445041	0.147128	-0.652621	0.0214208	0.531695	0.0752145	0.538063	0.0711442	0.530711	0.0758576	-0.462	0.130512	0.195549	0.542473
ENSMUSG00000044211	48524554	48525090	predicted gene 7887 [Source:MGI Symbol;Acc:MGI:3648251]	Gm7887	processed_pseudogene	-1	yellow	-0.516843	0.085322	0.247255	0.438469	0.667513	0.0177025	-0.724462	0.00770158	-0.714448	0.00903649	0.696907	0.011781	-0.795805	0.00196181	0.382041	0.220376	0.483892	0.110942	0.444769	0.147405	-0.436001	0.156514	0.817357	0.00116756	-0.245669	0.441508	0.435007	0.157569	-0.361988	0.247572	0.869144	0.000241584	0.313279	0.321424	0.664933	0.0183099	-0.637645	0.0257036	-0.360139	0.250174
ENSMUSG00000041075	59482424	59486955	frizzled class receptor 7 [Source:MGI Symbol;Acc:MGI:108570]	Fzd7	protein_coding	1	yellow	0.0102907	0.974679	0.118667	0.713383	0.515939	0.0859657	-0.672852	0.0164927	-0.398811	0.199078	0.509686	0.0905062	-0.689436	0.0131205	-0.0461021	0.886867	0.592719	0.0422518	0.686066	0.0137602	-0.421434	0.172424	0.845102	0.000538193	0.268467	0.398832	0.733146	0.00666864	-0.755648	0.00447476	0.572259	0.0518512	0.409365	0.186347	0.632258	0.0273861	-0.627455	0.0289515	-0.0922563	0.77552
ENSMUSG00000050312	62732444	62786818	NOL1/NOP2/Sun domain family member 3 [Source:MGI Symbol;Acc:MGI:2146565]	Nsun3	protein_coding	-1	yellow	-0.2247	0.482603	0.109135	0.735645	0.477141	0.116755	-0.553468	0.0619284	-0.512508	0.088437	0.387013	0.213923	-0.698839	0.0114519	-0.0411872	0.89887	0.233784	0.464589	0.448284	0.143851	-0.538521	0.0708572	0.646527	0.0230954	0.121421	0.706986	0.187923	0.558629	-0.485089	0.109931	0.340187	0.27927	0.343875	0.273753	0.267929	0.399813	-0.304302	0.33622	-0.351607	0.262389
ENSMUSG00000026836	58388644	58567157	activin A receptor, type 1 [Source:MGI Symbol;Acc:MGI:87911]	Acvr1	protein_coding	-1	yellow	-0.369739	0.236836	0.120729	0.708593	0.606445	0.0365656	-0.682568	0.0144483	-0.589662	0.0435988	0.600021	0.0391542	-0.565382	0.0553945	0.3694	0.2373	0.462487	0.130055	0.400533	0.196964	-0.0610566	0.850488	0.693198	0.0124327	-0.201991	0.528981	0.574094	0.0509329	-0.431723	0.161086	0.734621	0.00650415	0.179134	0.577487	0.52481	0.0797924	-0.72574	0.00754256	0.0842117	0.794707
ENSMUSG00000020542	65176561	65269989	myocardin [Source:MGI Symbol;Acc:MGI:2137495]	Myocd	protein_coding	-1	yellow	-0.0675581	0.834751	0.182365	0.570525	0.169266	0.598955	-0.199981	0.533176	-0.66665	0.017904	0.602023	0.0383338	-0.734718	0.00649346	-0.186485	0.561698	0.27492	0.387145	0.594342	0.041549	-0.399193	0.198607	0.640711	0.0247803	0.192017	0.549932	0.498245	0.0992275	-0.586337	0.0450982	0.431075	0.161786	0.121817	0.706069	0.363885	0.244918	-0.456961	0.135316	0.131656	0.683375
ENSMUSG00000033590	75232020	75305451	myosin VC [Source:MGI Symbol;Acc:MGI:2442485]	Myo5c	protein_coding	1	yellow	-0.238075	0.456191	-0.0320096	0.921334	0.354753	0.257846	-0.506059	0.0932124	-0.658596	0.0198665	0.710648	0.00958564	-0.852889	0.000421613	-0.0320278	0.921289	0.623064	0.0304386	0.633754	0.026911	-0.523197	0.0808917	0.816961	0.00117943	0.0854921	0.791646	0.411346	0.184016	-0.40178	0.195444	0.77762	0.002908	0.487702	0.107747	0.709463	0.00976201	-0.435298	0.15726	0.0182133	0.955198
ENSMUSG00000019929	97479609	97518143	decorin [Source:MGI Symbol;Acc:MGI:94872]	Dcn	protein_coding	1	yellow	-0.235628	0.460972	0.364261	0.244394	0.53112	0.0755897	-0.51823	0.0843414	-0.523072	0.0809772	0.571417	0.0522762	-0.616096	0.0329097	0.181015	0.57343	0.244708	0.443353	0.453479	0.1387	-0.190369	0.553425	0.666132	0.0180258	-0.0715579	0.825097	0.550909	0.0633984	-0.732533	0.00673792	0.558259	0.0592399	-0.000675085	0.998339	0.270956	0.394303	-0.847888	0.000493924	-0.060266	0.852405
ENSMUSG00000026491	179744894	179803680	AT hook containing transcription factor 1 [Source:MGI Symbol;Acc:MGI:1915033]	Ahctf1	protein_coding	-1	yellow	-0.0739274	0.819388	-0.0161052	0.96038	0.657265	0.0202053	-0.817492	0.00116351	-0.359486	0.251097	0.641595	0.0245188	-0.71974	0.0083112	0.102601	0.751015	0.644861	0.0235693	0.690545	0.0129149	-0.514667	0.0868762	0.877657	0.000175176	0.125877	0.696676	0.575144	0.0504128	-0.561465	0.057487	0.749741	0.00498795	0.642132	0.0243608	0.775631	0.00302941	-0.568392	0.0538234	-0.226067	0.479872
ENSMUSG00000054469	73107985	73243368	lysocardiolipin acyltransferase 1 [Source:MGI Symbol;Acc:MGI:2684937]	Lclat1	protein_coding	1	yellow	-0.191935	0.550105	-0.139543	0.665355	0.548798	0.0646289	-0.810708	0.00137957	-0.453695	0.138489	0.546882	0.0657601	-0.840152	0.000624358	-0.0386726	0.905019	0.866213	0.000268501	0.666616	0.017912	-0.543601	0.0677292	0.961839	5.97775e-07	0.222652	0.486707	0.464121	0.128525	-0.554777	0.0611854	0.79248	0.00211408	0.660605	0.019363	0.785289	0.00247423	-0.514157	0.0872432	-0.0777539	0.810187
ENSMUSG00000037111	51515319	51560879	SET domain containing (lysine methyltransferase) 7 [Source:MGI Symbol;Acc:MGI:1920501]	Setd7	protein_coding	-1	yellow	0.26451	0.406083	-0.209511	0.513414	0.147402	0.647558	-0.459823	0.132574	-0.0982516	0.761294	0.230939	0.470197	-0.685574	0.0138555	-0.537447	0.0715307	0.800303	0.00176935	0.739815	0.00594892	-0.748347	0.00511528	0.788164	0.00232504	0.680752	0.0148154	0.533115	0.0742932	-0.713328	0.00919584	0.370882	0.235278	0.740827	0.00584506	0.68706	0.0135692	-0.254056	0.425559	-0.127454	0.693038
ENSMUSG00000064370	14145	15288	mitochondrially encoded cytochrome b [Source:MGI Symbol;Acc:MGI:102501]	mt-Cytb	protein_coding	1	yellow	-0.139846	0.664665	-0.0143816	0.964617	0.491756	0.104416	-0.634302	0.0267385	-0.495619	0.101306	0.597123	0.0403637	-0.86378	0.000292567	-0.0663469	0.837679	0.73198	0.00680095	0.711201	0.0095043	-0.682129	0.0145365	0.937171	6.93473e-06	0.228712	0.474607	0.549784	0.0640522	-0.601938	0.0383684	0.72558	0.00756226	0.615248	0.0332202	0.794207	0.00203392	-0.521729	0.0819008	-0.22609	0.479825
ENSMUSG00000025862	42149317	42277185	stromal antigen 2 [Source:MGI Symbol;Acc:MGI:1098583]	Stag2	protein_coding	1	yellow	-0.144035	0.655161	0.0987457	0.760125	0.493715	0.102831	-0.677943	0.0153967	-0.465322	0.127408	0.649249	0.022336	-0.868252	0.00024954	-0.0307108	0.924518	0.731374	0.00687044	0.713905	0.00911345	-0.683418	0.0142788	0.927464	1.3989e-05	0.176154	0.583938	0.56995	0.0530227	-0.62162	0.0309395	0.821344	0.00105304	0.603781	0.0376237	0.828607	0.000866856	-0.586132	0.0451917	-0.305602	0.334054
ENSMUSG00000024921	26605050	26778322	SWI/SNF related, matrix associated, actin dependent regulator of chromatin, subfamily a, member 2 [Source:MGI Symbol;Acc:MGI:99603]	Smarca2	protein_coding	1	yellow	0.101106	0.754544	-0.183051	0.569052	0.339365	0.280509	-0.573536	0.051211	-0.408401	0.187489	0.503332	0.0952835	-0.873315	0.000206971	-0.40145	0.195845	0.779058	0.00282256	0.843921	0.000557856	-0.710735	0.00957289	0.931574	1.05235e-05	0.53471	0.0732678	0.533325	0.0741577	-0.75357	0.0046505	0.536014	0.0724365	0.727436	0.00733525	0.705611	0.0103516	-0.383978	0.217848	0.00435985	0.989271
ENSMUSG00000098259	162674158	162674220	predicted gene, 27616 [Source:MGI Symbol;Acc:MGI:5530998]	Gm27616	miRNA	-1	yellow	-0.494461	0.102232	0.344311	0.273104	0.505989	0.0932651	-0.494943	0.101846	-0.8194	0.00110772	0.753533	0.00465368	-0.91216	3.54859e-05	0.214288	0.503632	0.41768	0.176683	0.51081	0.089678	-0.571197	0.0523875	0.82089	0.00106561	-0.173685	0.589304	0.426784	0.166468	-0.481428	0.113041	0.826699	0.000913086	0.231909	0.468282	0.599179	0.0395031	-0.666182	0.018014	-0.345572	0.271235
ENSMUSG00000032413	96539300	96631617	RAS p21 protein activator 2 [Source:MGI Symbol;Acc:MGI:2149960]	Rasa2	protein_coding	-1	yellow	-0.240527	0.451425	-0.19199	0.549988	0.533668	0.073937	-0.813084	0.00130066	-0.410023	0.185571	0.4815	0.112979	-0.777847	0.0028944	-0.0426918	0.895193	0.830597	0.000820586	0.565901	0.0551213	-0.345994	0.270611	0.899469	6.8165e-05	0.189352	0.555586	0.319269	0.311753	-0.586712	0.0449273	0.749129	0.00504353	0.520153	0.0829942	0.566224	0.0549519	-0.593	0.0421296	0.140849	0.662385
ENSMUSG00000037533	54522847	54699285	Rap guanine nucleotide exchange factor (GEF) 6 [Source:MGI Symbol;Acc:MGI:2384761]	Rapgef6	protein_coding	1	yellow	-0.0197257	0.951481	0.0741352	0.818888	0.654757	0.0208553	-0.512846	0.0881916	-0.357697	0.253636	0.807153	0.00150444	-0.705286	0.0104025	0.0856932	0.791166	0.532878	0.0744469	0.729638	0.00707252	-0.456104	0.136143	0.75813	0.00427144	0.032521	0.92008	0.2137	0.504831	-0.510641	0.0898023	0.722177	0.00799229	0.546853	0.0657775	0.606712	0.0364608	-0.482202	0.112378	-0.0745984	0.817773
ENSMUSG00000040651	27428834	27483555	transcription activation suppressor [Source:MGI Symbol;Acc:MGI:1921694]	Tasor	protein_coding	1	yellow	0.0829917	0.797627	-0.500453	0.097502	0.222512	0.486988	-0.613093	0.0340179	-0.099062	0.759376	0.226173	0.47966	-0.636739	0.0259814	-0.431357	0.161481	0.699296	0.0113749	0.537975	0.0711994	-0.56415	0.0560468	0.676003	0.0158078	0.51601	0.085915	-0.0397868	0.902294	-0.311652	0.324078	0.373479	0.231756	0.761706	0.0039909	0.443721	0.148475	0.0207554	0.948951	0.0573992	0.859363
ENSMUSG00000025907	6206197	6276648	RB1-inducible coiled-coil 1 [Source:MGI Symbol;Acc:MGI:1341850]	Rb1cc1	protein_coding	1	yellow	-0.401116	0.196253	0.27805	0.381543	0.577188	0.0494111	-0.63677	0.0259717	-0.639828	0.0250438	0.719128	0.00839278	-0.840768	0.000613089	0.236321	0.459616	0.603569	0.0377091	0.564049	0.0561004	-0.505164	0.0938891	0.875265	0.000192179	-0.122811	0.703766	0.59424	0.0415928	-0.599768	0.0392586	0.91122	3.73635e-05	0.351019	0.263244	0.729535	0.00708471	-0.811251	0.00136122	-0.294408	0.352946
ENSMUSG00000064341	2751	3707	mitochondrially encoded NADH dehydrogenase 1 [Source:MGI Symbol;Acc:MGI:101787]	mt-Nd1	protein_coding	1	yellow	-0.597638	0.0401468	0.198004	0.537314	0.639244	0.0252191	-0.711992	0.00938872	-0.733918	0.00658213	0.6689	0.0173821	-0.82964	0.000842593	0.332969	0.290251	0.511826	0.0889345	0.386662	0.214375	-0.321744	0.307806	0.825335	0.000947283	-0.248367	0.436346	0.276649	0.384044	-0.423809	0.169764	0.875536	0.000190187	0.191502	0.551022	0.48642	0.108815	-0.729184	0.00712618	-0.151133	0.639167
ENSMUSG00000036863	145987870	146021720	synapse defective 1, Rho GTPase, homolog 2 (C. elegans) [Source:MGI Symbol;Acc:MGI:3036264]	Syde2	protein_coding	1	yellow	-0.155733	0.628876	-0.0539096	0.867845	0.463058	0.129519	-0.606332	0.0366102	-0.514571	0.0869456	0.379122	0.224218	-0.593887	0.0417451	0.040268	0.901117	0.470621	0.122556	0.477213	0.116692	-0.331321	0.292793	0.695363	0.0120492	0.155687	0.62898	0.478441	0.11562	-0.369024	0.237815	0.425017	0.168421	0.373089	0.232284	0.527254	0.0781462	-0.288978	0.362308	-0.0521398	0.872151
ENSMUSG00000029669	21771395	21852515	tetraspanin 12 [Source:MGI Symbol;Acc:MGI:1889818]	Tspan12	protein_coding	-1	yellow	0.0723066	0.823292	-0.0139098	0.965778	0.392242	0.207264	-0.426411	0.166879	-0.109218	0.73545	0.466566	0.126258	-0.557699	0.0595499	-0.128159	0.691415	0.780095	0.00276216	0.600971	0.0387633	-0.270477	0.395173	0.698048	0.0115859	0.248111	0.436833	0.260608	0.4133	-0.609757	0.0352799	0.628131	0.0287274	0.400377	0.197156	0.525228	0.0795088	-0.526847	0.078419	0.189813	0.554606
ENSMUSG00000029613	143817788	143904251	eukaryotic translation initiation factor 2 alpha kinase 1 [Source:MGI Symbol;Acc:MGI:1353448]	Eif2ak1	protein_coding	1	yellow	-0.359356	0.251281	0.0632978	0.845057	0.516114	0.0858407	-0.732745	0.00671397	-0.585095	0.0456673	0.645705	0.0233283	-0.750632	0.00490782	0.204666	0.523421	0.708308	0.00993605	0.508	0.0917573	-0.323629	0.304818	0.826054	0.000929127	-0.069059	0.831126	0.48835	0.10721	-0.385017	0.216499	0.904664	5.27536e-05	0.396414	0.202041	0.743007	0.00562592	-0.599939	0.0391883	-0.0362051	0.911057
ENSMUSG00000084911	97085326	97088610	predicted gene 16185 [Source:MGI Symbol;Acc:MGI:3802169]	Gm16185	antisense	1	yellow	-0.441363	0.150903	0.0815315	0.801124	0.473378	0.12008	-0.485755	0.109372	-0.786955	0.00238691	0.750021	0.00496267	-0.828596	0.000867123	0.144839	0.653344	0.346779	0.269453	0.45639	0.135867	-0.25979	0.414821	0.743852	0.00554268	-0.137529	0.669941	0.175202	0.586005	-0.413977	0.180948	0.717034	0.00867637	0.110031	0.733544	0.307091	0.331584	-0.61078	0.0348894	0.178567	0.578713
ENSMUSG00000031666	91070057	91123844	RB transcriptional corepressor like 2 [Source:MGI Symbol;Acc:MGI:105085]	Rbl2	protein_coding	1	yellow	0.0990996	0.759287	-0.183149	0.56884	0.169991	0.597367	-0.4643	0.128358	-0.323538	0.304962	0.45874	0.133607	-0.83815	0.000662089	-0.451657	0.140493	0.79775	0.00187671	0.749395	0.00501936	-0.709488	0.00975826	0.854327	0.000402421	0.531673	0.0752291	0.395704	0.202925	-0.604233	0.0374426	0.57135	0.0523102	0.651608	0.0216927	0.688454	0.0133046	-0.295515	0.351051	0.0139277	0.965734
ENSMUSG00000060128	172669034	172669636	predicted gene 2710 [Source:MGI Symbol;Acc:MGI:3780879]	Gm2710	processed_pseudogene	-1	yellow	-0.359173	0.25154	0.301594	0.340755	0.753592	0.00464856	-0.469835	0.123269	-0.716872	0.00869862	0.814026	0.00127037	-0.724442	0.00770418	0.353325	0.259902	0.363664	0.245226	0.546417	0.0660369	-0.234256	0.463661	0.738566	0.00607909	-0.242979	0.446683	0.263191	0.408517	-0.482412	0.112199	0.711877	0.00940543	0.160503	0.618268	0.436588	0.155893	-0.641158	0.0246478	-0.0246386	0.939415
ENSMUSG00000025234	59388258	59486618	ariadne RBR E3 ubiquitin protein ligase 1 [Source:MGI Symbol;Acc:MGI:1344363]	Arih1	protein_coding	-1	yellow	-0.331713	0.292187	0.216561	0.499007	0.53058	0.0759432	-0.478298	0.115745	-0.612228	0.0343418	0.770684	0.00334816	-0.706211	0.010258	0.306938	0.331838	0.328226	0.297598	0.503716	0.0949895	-0.497305	0.0999682	0.692378	0.0125803	-0.219789	0.492471	0.479192	0.114968	-0.34433	0.273077	0.77575	0.00302207	0.353367	0.259842	0.662978	0.0187802	-0.59298	0.0421385	-0.336741	0.284483
ENSMUSG00000035933	31654869	31937630	component of oligomeric golgi complex 5 [Source:MGI Symbol;Acc:MGI:2145130]	Cog5	protein_coding	1	yellow	-0.177666	0.580662	-0.163515	0.611604	0.673466	0.0163575	-0.811339	0.00135828	-0.356929	0.25473	0.52509	0.0796025	-0.624023	0.0301091	0.10438	0.746822	0.488213	0.107323	0.528044	0.0776192	-0.276574	0.38418	0.743861	0.00554179	0.0570236	0.860275	0.269963	0.396107	-0.530128	0.0762406	0.579269	0.0484058	0.514148	0.0872498	0.40286	0.194132	-0.544311	0.0672995	0.0302795	0.925575
ENSMUSG00000020696	82802449	82871210	ring finger and FYVE like domain containing protein [Source:MGI Symbol;Acc:MGI:1914588]	Rffl	protein_coding	-1	yellow	-0.260014	0.414405	-0.256399	0.421155	0.201829	0.529319	-0.604888	0.0371816	0.0410295	0.899255	-0.0037196	0.990846	-0.223935	0.484133	0.0971947	0.763797	0.606122	0.0366928	0.0473941	0.883715	-0.222843	0.486323	0.328657	0.296927	-0.0147118	0.963806	0.0447237	0.890231	0.0630328	0.845699	0.497134	0.100103	0.525075	0.0796125	0.496378	0.100702	-0.087587	0.786643	-0.244208	0.444315
ENSMUSG00000085438	119594297	119607502	Opa interacting protein 5, opposite strand 1 [Source:MGI Symbol;Acc:MGI:1913852]	Oip5os1	lincRNA	1	yellow	0.115456	0.72086	-0.227646	0.476725	0.335765	0.285969	-0.603761	0.0376317	-0.384687	0.216927	0.51706	0.0851681	-0.86055	0.000327072	-0.409566	0.18611	0.786699	0.00240019	0.830657	0.000819241	-0.62819	0.0287079	0.924981	1.64818e-05	0.53958	0.0701968	0.461564	0.130924	-0.723299	0.0078485	0.551532	0.0630384	0.690966	0.0128375	0.653613	0.0211567	-0.374931	0.229802	0.124617	0.699587
ENSMUSG00000096844	70434952	70435476	immunoglobulin kappa variable 6-14 [Source:MGI Symbol;Acc:MGI:1330830]	Igkv6-14	IG_V_gene	-1	yellow	-0.0611454	0.850273	-0.428832	0.164222	0.347572	0.268284	-0.653751	0.0211204	-0.0886063	0.784212	0.193091	0.547659	-0.408151	0.187785	-0.0847458	0.79343	0.629161	0.0283885	0.292753	0.355785	0.00842302	0.979273	0.603914	0.0375704	0.257756	0.418614	0.0472772	0.884	-0.276217	0.384818	0.415833	0.178801	0.263461	0.408017	0.222525	0.486961	-0.31407	0.320138	0.461925	0.130584
ENSMUSG00000020456	6291633	6356642	oxoglutarate (alpha-ketoglutarate) dehydrogenase (lipoamide) [Source:MGI Symbol;Acc:MGI:1098267]	Ogdh	protein_coding	1	yellow	0.235901	0.460436	-0.362505	0.246847	0.0706408	0.827309	-0.369684	0.236911	-0.263469	0.408004	0.313462	0.321127	-0.76094	0.00404981	-0.610829	0.0348709	0.7564	0.00441242	0.772986	0.00319685	-0.794968	0.00199934	0.770346	0.00337083	0.69233	0.012589	0.38098	0.221767	-0.539511	0.0702396	0.337354	0.283552	0.816787	0.00118467	0.682577	0.0144466	-0.0300291	0.926189	0.00969636	0.976141
ENSMUSG00000021555	59585259	59635922	N(alpha)-acetyltransferase 35, NatC auxiliary subunit [Source:MGI Symbol;Acc:MGI:1925939]	Naa35	protein_coding	1	yellow	-0.555324	0.060877	-0.108312	0.737576	0.686723	0.0136339	-0.760291	0.0041002	-0.603153	0.0378764	0.59813	0.0399405	-0.599636	0.0393136	0.439511	0.152826	0.40464	0.191983	0.258958	0.41637	-0.0732897	0.820924	0.659333	0.0196807	-0.322699	0.306289	0.0868343	0.78844	-0.139454	0.665556	0.743464	0.00558078	0.248098	0.436859	0.366804	0.240868	-0.52157	0.0820104	0.0852976	0.792111
ENSMUSG00000027210	115863064	116065839	Meis homeobox 2 [Source:MGI Symbol;Acc:MGI:108564]	Meis2	protein_coding	-1	yellow	0.371112	0.234964	-0.0308681	0.924132	0.0592953	0.85476	-0.283184	0.372441	-0.0647476	0.841547	0.148161	0.645847	-0.538258	0.071022	-0.546309	0.0661011	0.544541	0.067161	0.67855	0.0152697	-0.650528	0.0219855	0.628897	0.028475	0.682931	0.0143757	0.644496	0.023674	-0.774029	0.00313003	0.154994	0.630525	0.520471	0.0827724	0.516668	0.0854466	-0.258113	0.417947	-0.153653	0.633522
ENSMUSG00000041577	133910304	133921414	proline arginine-rich end leucine-rich repeat [Source:MGI Symbol;Acc:MGI:2151110]	Prelp	protein_coding	-1	yellow	0.470208	0.12293	-0.206585	0.519448	0.0360124	0.911529	-0.300868	0.341976	0.0561741	0.862339	0.0975839	0.762875	-0.504039	0.0947438	-0.652874	0.0213533	0.585079	0.0456747	0.706861	0.0101574	-0.651666	0.0216773	0.614494	0.0334978	0.787998	0.00233348	0.551033	0.0633262	-0.774359	0.00310906	0.0894118	0.782292	0.637432	0.0257688	0.477291	0.116624	-0.179954	0.575718	-0.05078	0.875462
ENSMUSG00000031075	144588549	144751974	anoctamin 1, calcium activated chloride channel [Source:MGI Symbol;Acc:MGI:2142149]	Ano1	protein_coding	-1	yellow	0.213065	0.506129	-0.453451	0.138728	-0.0584846	0.856727	-0.350396	0.264151	-0.0908754	0.778806	0.135893	0.673674	-0.663062	0.0187598	-0.680767	0.0148123	0.846469	0.000516101	0.622005	0.0308052	-0.659096	0.0197404	0.686196	0.0137351	0.722968	0.00789079	0.205721	0.521236	-0.489615	0.106166	0.31964	0.311161	0.730768	0.00694053	0.550261	0.0637742	-0.023242	0.942844	0.151666	0.637972
ENSMUSG00000064351	5328	6872	mitochondrially encoded cytochrome c oxidase I [Source:MGI Symbol;Acc:MGI:102504]	mt-Co1	protein_coding	1	yellow	-0.383908	0.217939	0.0419709	0.896955	0.546098	0.0662269	-0.689076	0.0131879	-0.737218	0.0062219	0.714318	0.00905493	-0.937282	6.87461e-06	0.0724707	0.822897	0.675204	0.0159795	0.610383	0.0350406	-0.458998	0.133361	0.939557	5.73725e-06	0.025985	0.93611	0.380123	0.222895	-0.522963	0.0810517	0.848241	0.000488531	0.393023	0.206279	0.63309	0.027121	-0.609021	0.0355626	0.00595142	0.985355
ENSMUSG00000061079	110061217	110095394	zinc finger protein 143 [Source:MGI Symbol;Acc:MGI:1277969]	Zfp143	protein_coding	1	yellow	-0.451964	0.14019	0.3357	0.286069	0.49393	0.102658	-0.504474	0.0944124	-0.76163	0.00399673	0.669988	0.0171339	-0.680506	0.0148657	0.361631	0.248073	0.235043	0.462118	0.374911	0.229829	-0.419213	0.174936	0.615482	0.0331343	-0.280943	0.376399	0.428821	0.164235	-0.181376	0.572652	0.70104	0.0110852	0.213367	0.505512	0.599309	0.039449	-0.410468	0.185047	-0.411613	0.183703
ENSMUSG00000095130	114914599	114915032	immunoglobulin heavy variable 1-39 [Source:MGI Symbol;Acc:MGI:4439888]	Ighv1-39	IG_V_gene	-1	yellow	-0.00776412	0.980895	-0.391879	0.207722	0.351147	0.263058	-0.583681	0.0463219	-0.432383	0.160375	0.397598	0.200574	-0.700981	0.0110949	-0.319375	0.311584	0.590699	0.0431387	0.613943	0.0337016	-0.293559	0.3544	0.751217	0.00485574	0.415464	0.179227	0.191132	0.551808	-0.547397	0.0654547	0.361412	0.248381	0.494857	0.101914	0.305808	0.333712	-0.270922	0.394364	0.438398	0.153989
ENSMUSG00000110926	55518569	55519289	predicted gene 5917 [Source:MGI Symbol;Acc:MGI:3646334]	Gm5917	processed_pseudogene	1	yellow	-0.58336	0.046471	0.413895	0.181042	0.572168	0.0518969	-0.529134	0.076896	-0.838695	0.000651649	0.661116	0.0192364	-0.770846	0.0033373	0.40077	0.196675	0.30898	0.328464	0.372536	0.233031	-0.452421	0.139739	0.714234	0.00906681	-0.31862	0.312794	0.479741	0.114493	-0.350683	0.263734	0.759435	0.00416741	0.157781	0.624314	0.58314	0.0465738	-0.616368	0.0328106	-0.459813	0.132583
ENSMUSG00000074305	56201126	56418067	pseudopodium-enriched atypical kinase 1 [Source:MGI Symbol;Acc:MGI:2442366]	Peak1	protein_coding	-1	yellow	0.0375055	0.907874	-0.115553	0.720634	0.198965	0.535301	-0.420792	0.173149	-0.405305	0.191183	0.544329	0.067289	-0.805461	0.00156683	-0.368554	0.238459	0.644762	0.0235976	0.713889	0.00911577	-0.558299	0.0592178	0.780535	0.00273683	0.395534	0.203135	0.369468	0.237207	-0.647474	0.0228292	0.567719	0.0541722	0.523191	0.0808954	0.538274	0.0710116	-0.415311	0.179404	0.14351	0.656352
ENSMUSG00000024070	78949405	79020816	protein kinase D3 [Source:MGI Symbol;Acc:MGI:1922542]	Prkd3	protein_coding	-1	yellow	0.0800362	0.804709	-0.137483	0.670045	0.476483	0.117331	-0.718283	0.00850646	-0.174072	0.588461	0.35438	0.258382	-0.690015	0.0130129	-0.212063	0.508179	0.753053	0.004695	0.708989	0.00983317	-0.689175	0.0131693	0.845994	0.000523699	0.421954	0.171839	0.545487	0.0665926	-0.684714	0.0140232	0.519644	0.0833491	0.793474	0.00206764	0.738121	0.00612596	-0.404583	0.192051	-0.305021	0.335022
ENSMUSG00000028690	116702279	116708406	methylmalonic aciduria cblC type, with homocystinuria [Source:MGI Symbol;Acc:MGI:1914346]	Mmachc	protein_coding	-1	yellow	-0.421061	0.172845	0.10539	0.744446	0.50767	0.0920042	-0.396134	0.202389	-0.663294	0.0187037	0.675897	0.0158305	-0.522421	0.0814238	0.430486	0.162424	0.112337	0.728144	0.264557	0.405998	-0.0973074	0.76353	0.520803	0.0825419	-0.345512	0.271324	0.256822	0.420363	-0.110732	0.731901	0.596738	0.0405264	0.00519796	0.987209	0.321136	0.308773	-0.497698	0.0996584	0.0427946	0.894942
ENSMUSG00000082938	40328438	40329427	predicted pseudogene 2810 [Source:MGI Symbol;Acc:MGI:3780980]	Gm2810	processed_pseudogene	1	yellow	-0.551046	0.0633191	-0.107904	0.738535	0.340869	0.278245	-0.482242	0.112344	-0.647276	0.0228846	0.444892	0.14728	-0.70509	0.0104333	0.100756	0.755373	0.527641	0.0778876	0.225609	0.480785	-0.101247	0.754213	0.666821	0.017864	-0.100403	0.756206	-0.0176313	0.956628	-0.259842	0.414724	0.657884	0.0200473	0.0386276	0.905129	0.210021	0.512366	-0.508458	0.0914165	0.331481	0.292546
ENSMUSG00000022672	15637866	15842235	protein kinase, DNA activated, catalytic polypeptide [Source:MGI Symbol;Acc:MGI:104779]	Prkdc	protein_coding	1	yellow	0.304384	0.336083	-0.26822	0.399283	0.512699	0.0882982	-0.501599	0.0966152	0.205083	0.522557	0.349873	0.264914	-0.280625	0.376963	-0.115536	0.720673	0.54237	0.068478	0.544261	0.0673297	-0.0489811	0.879845	0.527284	0.0781263	0.301698	0.340579	0.0974317	0.763236	-0.574782	0.050592	0.337093	0.283949	0.44138	0.150885	0.237133	0.458029	-0.428284	0.164822	0.362223	0.247241
ENSMUSG00000001089	136469761	136554780	leucine zipper protein 1 [Source:MGI Symbol;Acc:MGI:107629]	Luzp1	protein_coding	1	yellow	-0.00984086	0.975785	-0.0284281	0.930115	0.180108	0.575385	-0.350511	0.263983	-0.503406	0.0952265	0.498914	0.0987025	-0.858685	0.00034839	-0.34574	0.270987	0.607678	0.0360833	0.734568	0.00650999	-0.919749	2.28831e-05	0.774231	0.00311722	0.386695	0.214333	0.464471	0.128199	-0.491992	0.104224	0.514726	0.086834	0.739723	0.00595843	0.790179	0.00222462	-0.160315	0.618685	-0.367316	0.240162
ENSMUSG00000018377	88068279	88084729	vascular endothelial zinc finger 1 [Source:MGI Symbol;Acc:MGI:1313291]	Vezf1	protein_coding	1	yellow	0.224499	0.483005	-0.184671	0.565578	0.196525	0.54042	-0.520342	0.0828626	-0.231079	0.46992	0.343829	0.273821	-0.782848	0.00260654	-0.526278	0.0788007	0.83524	0.000720057	0.820953	0.00106387	-0.779802	0.00277915	0.854468	0.000400574	0.658092	0.0199944	0.567334	0.0543724	-0.736096	0.00634272	0.45674	0.135529	0.802029	0.00169947	0.760871	0.00405518	-0.262575	0.409655	-0.109389	0.735049
ENSMUSG00000056592	43562256	43575461	zinc finger protein 658 [Source:MGI Symbol;Acc:MGI:2652821]	Zfp658	protein_coding	1	yellow	-0.276146	0.384946	-0.0813536	0.80155	0.325006	0.302645	-0.475587	0.11812	-0.44158	0.150678	0.258446	0.417326	-0.682893	0.0143833	-0.122659	0.704118	0.44002	0.152296	0.401196	0.196156	-0.695862	0.0119621	0.610205	0.0351084	0.158998	0.621609	0.126309	0.69568	-0.31802	0.313756	0.376448	0.227771	0.592428	0.0423788	0.461185	0.131282	-0.123247	0.702756	-0.443883	0.148309
ENSMUSG00000042105	128611328	128696425	inositol polyphosphate-5-phosphatase F [Source:MGI Symbol;Acc:MGI:2141867]	Inpp5f	protein_coding	1	yellow	0.196901	0.53963	-0.184366	0.56623	0.567502	0.054285	-0.580128	0.0479948	0.00901448	0.977818	0.405805	0.190583	-0.379109	0.224235	-0.0815216	0.801147	0.432977	0.159738	0.506407	0.0929503	0.00546425	0.986553	0.558216	0.0592635	0.258683	0.416883	-0.0648082	0.841401	-0.477736	0.116234	0.329399	0.295772	0.283524	0.371843	0.106238	0.742449	-0.321855	0.307628	0.391974	0.207601
ENSMUSG00000021365	41309581	41487362	neural precursor cell expressed, developmentally down-regulated gene 9 [Source:MGI Symbol;Acc:MGI:97302]	Nedd9	protein_coding	-1	yellow	-0.0246683	0.939342	-0.179453	0.576798	0.0939233	0.771558	-0.405392	0.191079	-0.0596341	0.853938	0.339213	0.280738	-0.482264	0.112325	-0.146855	0.648791	0.736644	0.00628343	0.400298	0.197252	-0.331938	0.29184	0.569527	0.053239	0.202373	0.528184	0.299755	0.343852	-0.314927	0.318747	0.665279	0.0182275	0.438568	0.153811	0.60334	0.037801	-0.404116	0.192613	0.0995366	0.758254
ENSMUSG00000107211	32420003	32420972	predicted gene 5864 [Source:MGI Symbol;Acc:MGI:3648579]	Gm5864	processed_pseudogene	1	yellow	-0.512206	0.0886572	0.0666702	0.836897	0.486179	0.109017	-0.585103	0.0456636	-0.733975	0.00657577	0.699166	0.0113968	-0.799306	0.00181072	0.256549	0.420874	0.619414	0.0317159	0.428878	0.164172	-0.275847	0.385481	0.806608	0.00152432	-0.184542	0.565854	0.355986	0.256078	-0.332502	0.29097	0.905178	5.13913e-05	0.228754	0.474524	0.608677	0.0356957	-0.652927	0.0213392	0.076452	0.813315
ENSMUSG00000028944	24862744	25100642	protein kinase, AMP-activated, gamma 2 non-catalytic subunit [Source:MGI Symbol;Acc:MGI:1336153]	Prkag2	protein_coding	-1	yellow	-0.0694817	0.830106	-0.170603	0.596029	0.519877	0.0831866	-0.690094	0.0129983	-0.544563	0.0671477	0.628163	0.0287168	-0.907339	4.59689e-05	-0.201474	0.530059	0.682219	0.0145183	0.782492	0.0026263	-0.578818	0.0486224	0.952993	1.66998e-06	0.33831	0.282103	0.388211	0.212386	-0.666673	0.0178986	0.61923	0.0317812	0.628667	0.0285508	0.600698	0.0388755	-0.449379	0.142755	0.0695128	0.830031
ENSMUSG00000039958	149139849	149151171	electron transfer flavoprotein beta subunit lysine methyltransferase [Source:MGI Symbol;Acc:MGI:2443575]	Etfbkmt	protein_coding	1	yellow	0.201928	0.529112	-0.365612	0.242517	0.37614	0.228183	-0.517207	0.0850638	-0.146485	0.649627	0.263471	0.408	-0.459658	0.132731	-0.321026	0.308947	0.256437	0.421083	0.535692	0.0726417	-0.255341	0.423141	0.539049	0.0705272	0.440657	0.151633	0.103494	0.748911	-0.554551	0.0613134	0.0618686	0.84852	0.450901	0.141241	0.0544752	0.866469	-0.185454	0.563901	0.275111	0.386802
ENSMUSG00000050974	14494561	14495159	predicted pseudogene 9847 [Source:MGI Symbol;Acc:MGI:3642840]	Gm9847	processed_pseudogene	1	yellow	0.264384	0.406317	-0.17808	0.579766	0.0762368	0.813832	-0.293462	0.354567	-0.343035	0.275004	0.319314	0.311681	-0.758016	0.00428062	-0.614368	0.0335441	0.598588	0.039749	0.785064	0.0024862	-0.746911	0.00524904	0.748993	0.00505602	0.696475	0.0118557	0.486838	0.108466	-0.684623	0.0140411	0.23109	0.469897	0.62853	0.0285959	0.554938	0.0610944	-0.121679	0.706388	0.00423327	0.989582
ENSMUSG00000055013	89454806	89897617	ArfGAP with GTPase domain, ankyrin repeat and PH domain 1 [Source:MGI Symbol;Acc:MGI:2653690]	Agap1	protein_coding	1	yellow	0.461032	0.131427	-0.272649	0.391238	-0.0127829	0.968549	-0.240116	0.452221	-0.0791626	0.806804	0.21902	0.494025	-0.625025	0.0297678	-0.718001	0.00854453	0.607538	0.0361375	0.799961	0.00178345	-0.802137	0.00169517	0.658947	0.0197779	0.809823	0.00140989	0.504843	0.0941319	-0.684215	0.0141212	0.139774	0.66483	0.768047	0.00352814	0.588921	0.0439297	-0.04346	0.893317	-0.0558435	0.863142
ENSMUSG00000020380	53649519	53707319	RAD50 double strand break repair protein [Source:MGI Symbol;Acc:MGI:109292]	Rad50	protein_coding	-1	yellow	-0.0845132	0.793986	0.190851	0.552404	0.794209	0.0020338	-0.609048	0.0355525	-0.408875	0.186928	0.787889	0.00233898	-0.72635	0.00746754	0.182512	0.570209	0.578475	0.0487877	0.723291	0.0078496	-0.329079	0.296269	0.866802	0.00026291	0.0112467	0.972327	0.378612	0.224892	-0.716536	0.00874489	0.747759	0.00516977	0.364124	0.244585	0.552326	0.0625814	-0.748813	0.00507242	-0.0105532	0.974033
ENSMUSG00000036856	137277489	137299726	wingless-type MMTV integration site family, member 4 [Source:MGI Symbol;Acc:MGI:98957]	Wnt4	protein_coding	1	yellow	-0.0642456	0.842763	-0.42294	0.170735	0.445188	0.146978	-0.674372	0.0161596	-0.366116	0.241819	0.31762	0.314399	-0.550193	0.0638137	-0.15125	0.638905	0.516407	0.0856316	0.459152	0.133214	-0.0507346	0.875573	0.674267	0.0161826	0.302813	0.338709	0.116192	0.719143	-0.42597	0.167365	0.316958	0.315465	0.344377	0.273006	0.175119	0.586185	-0.278922	0.379987	0.532808	0.0744919
ENSMUSG00000034135	46012820	46224194	SIK family kinase 3 [Source:MGI Symbol;Acc:MGI:2446296]	Sik3	protein_coding	1	yellow	0.32687	0.299717	-0.296827	0.348816	0.174525	0.587476	-0.422366	0.171378	-0.213759	0.504712	0.314535	0.319382	-0.712001	0.00938743	-0.584373	0.0460006	0.708554	0.00989871	0.836048	0.000703583	-0.73674	0.00627316	0.787833	0.00234184	0.720217	0.00824805	0.546693	0.0658723	-0.727875	0.00728235	0.276553	0.384217	0.798514	0.00184406	0.650113	0.022099	-0.172795	0.591243	0.0141549	0.965175
ENSMUSG00000047496	105276914	105356710	ring finger protein 152 [Source:MGI Symbol;Acc:MGI:2443787]	Rnf152	protein_coding	-1	yellow	-0.0694037	0.830294	-0.210734	0.510903	0.195994	0.541536	-0.384204	0.217554	-0.490313	0.105594	0.264834	0.405487	-0.768847	0.00347279	-0.413965	0.180962	0.581847	0.0471803	0.594228	0.0415978	-0.651829	0.0216331	0.722521	0.00794802	0.458263	0.134064	0.281007	0.376286	-0.554411	0.0613922	0.284065	0.370892	0.57718	0.0494149	0.445303	0.146862	-0.151804	0.637664	-0.0322552	0.920732
ENSMUSG00000025764	41555731	41616864	jade family PHD finger 1 [Source:MGI Symbol;Acc:MGI:1925835]	Jade1	protein_coding	1	yellow	0.208013	0.516499	0.146468	0.649664	0.158835	0.621971	-0.304284	0.336251	-0.294655	0.352521	0.406873	0.189307	-0.751347	0.00484424	-0.426481	0.166802	0.568339	0.0538507	0.79025	0.00222119	-0.872079	0.000216791	0.755351	0.00449953	0.520267	0.0829149	0.720384	0.00822606	-0.806553	0.00152636	0.402991	0.193974	0.618774	0.0319435	0.72353	0.00781916	-0.383185	0.218881	-0.39871	0.199202
ENSMUSG00000026113	37299865	37410736	inositol polyphosphate-4-phosphatase, type I [Source:MGI Symbol;Acc:MGI:1931123]	Inpp4a	protein_coding	1	yellow	0.383575	0.218372	-0.0240146	0.940947	0.209692	0.513043	-0.36426	0.244395	-0.157336	0.625304	0.31211	0.323329	-0.621979	0.0308145	-0.507055	0.0924637	0.495958	0.101036	0.81142	0.00135555	-0.693173	0.0124372	0.704552	0.0105182	0.651296	0.0217769	0.696006	0.0119369	-0.891044	0.000100453	0.197526	0.538317	0.620706	0.0312594	0.538236	0.0710356	-0.346449	0.269939	-0.151171	0.639082
ENSMUSG00000026933	25926838	25983282	calmodulin regulated spectrin-associated protein 1 [Source:MGI Symbol;Acc:MGI:3036242]	Camsap1	protein_coding	-1	yellow	0.263998	0.407027	-0.309505	0.327601	0.180401	0.574754	-0.485245	0.1098	-0.149798	0.642165	0.3063	0.332895	-0.567546	0.0542617	-0.400493	0.197014	0.787673	0.00235003	0.692333	0.0125885	-0.392981	0.206333	0.742463	0.00567997	0.581131	0.0475183	0.583461	0.046424	-0.605482	0.0369455	0.406976	0.189184	0.581535	0.0473275	0.636813	0.0259586	-0.305514	0.334201	0.289159	0.361994
ENSMUSG00000036333	24974925	25063152	kinase D-interacting substrate 220 [Source:MGI Symbol;Acc:MGI:1924730]	Kidins220	protein_coding	1	yellow	0.076194	0.813935	-0.143726	0.655861	0.0946756	0.769771	-0.401861	0.195346	-0.312872	0.322087	0.432837	0.159888	-0.779826	0.00277777	-0.408689	0.187147	0.847189	0.000504754	0.707609	0.0100426	-0.684571	0.0140513	0.803959	0.00162387	0.47947	0.114727	0.495502	0.101399	-0.54837	0.0648806	0.619148	0.0318103	0.646261	0.0231706	0.789796	0.00224348	-0.304105	0.336548	-0.00964485	0.976268
ENSMUSG00000001942	37555698	37649655	sialic acid acetylesterase [Source:MGI Symbol;Acc:MGI:104803]	Siae	protein_coding	1	yellow	0.0251362	0.938193	0.0363698	0.910654	0.584992	0.0457151	-0.495264	0.101589	-0.269192	0.39751	0.481768	0.11275	-0.555649	0.0606941	0.0249442	0.938665	0.68425	0.0141144	0.647757	0.0227498	-0.316789	0.315738	0.74468	0.00546195	0.186372	0.561939	0.481534	0.11295	-0.641728	0.0244795	0.537524	0.0714827	0.459826	0.132571	0.61261	0.0341987	-0.525088	0.079604	0.0193754	0.952342
ENSMUSG00000020589	12262139	12380965	family with sequence similarity 49, member A [Source:MGI Symbol;Acc:MGI:1261783]	Fam49a	protein_coding	1	yellow	0.222315	0.487383	-0.0262223	0.935528	0.10514	0.745033	-0.291501	0.357942	-0.271184	0.39389	0.394597	0.204305	-0.742335	0.00569277	-0.530086	0.0762676	0.511628	0.0890792	0.766789	0.00361652	-0.818595	0.00113102	0.685309	0.0139071	0.55304	0.0621721	0.466997	0.125861	-0.736035	0.00634933	0.329063	0.296295	0.669085	0.0173399	0.558722	0.0589846	-0.253161	0.427248	-0.219956	0.492133
ENSMUSG00000080474	135512351	135512479	predicted gene, 25317 [Source:MGI Symbol;Acc:MGI:5455094]	Gm25317	miRNA	-1	yellow	-0.184749	0.56541	0.050398	0.876393	0.237153	0.45799	-0.459854	0.132544	-0.107785	0.738814	0.337752	0.282948	-0.362515	0.246833	0.0991092	0.759265	0.396974	0.201347	0.229957	0.47214	-0.201051	0.530941	0.391796	0.207827	-0.0825073	0.798786	0.199225	0.534755	-0.272573	0.391376	0.59466	0.0414121	0.282913	0.372919	0.373717	0.231436	-0.466036	0.126747	-0.122537	0.7044
ENSMUSG00000103921	8327531	8329707	predicted gene 5841 [Source:MGI Symbol;Acc:MGI:3645248]	Gm5841	processed_pseudogene	1	yellow	-0.384528	0.217134	0.0514828	0.873751	0.643386	0.0239948	-0.709735	0.00972126	-0.565096	0.0555457	0.565084	0.0555521	-0.726842	0.00740731	0.254628	0.424482	0.552122	0.0626984	0.493389	0.103094	-0.521902	0.0817816	0.793552	0.00206402	-0.0946116	0.769923	0.445578	0.146582	-0.393637	0.205508	0.727786	0.00729298	0.535387	0.0728356	0.704796	0.0104796	-0.516947	0.0852484	-0.372935	0.232492
ENSMUSG00000047242	106206883	106221158	TATA-box binding protein associated factor 9B [Source:MGI Symbol;Acc:MGI:3039562]	Taf9b	protein_coding	-1	yellow	0.103137	0.749753	-0.0792959	0.806485	0.315466	0.317874	-0.518758	0.08397	-0.316326	0.316485	0.290696	0.359332	-0.746864	0.00525348	-0.397321	0.200916	0.556997	0.0599401	0.691083	0.0128161	-0.758941	0.00420658	0.773009	0.00319533	0.530397	0.0760638	0.40625	0.19005	-0.664558	0.0183995	0.293213	0.354994	0.650813	0.021908	0.531402	0.0754056	-0.197823	0.537694	-0.288803	0.362611
ENSMUSG00000015882	45697181	45857615	ligand dependent nuclear receptor corepressor-like [Source:MGI Symbol;Acc:MGI:2651932]	Lcorl	protein_coding	-1	yellow	-0.428688	0.164379	-0.0276728	0.931969	0.497602	0.0997335	-0.619756	0.0315945	-0.709273	0.00979042	0.723774	0.00778823	-0.838472	0.000655916	0.166657	0.604681	0.612396	0.0342789	0.516648	0.0854602	-0.414896	0.179884	0.818472	0.00113459	-0.100557	0.755841	0.292027	0.357035	-0.304167	0.336445	0.862969	0.000300944	0.424959	0.168485	0.657732	0.0200861	-0.500505	0.0974618	-0.00182031	0.99552
ENSMUSG00000026721	160219174	160793211	RAB GTPase activating protein 1-like [Source:MGI Symbol;Acc:MGI:1352507]	Rabgap1l	protein_coding	-1	yellow	-0.14646	0.649683	-0.0877747	0.786195	0.415119	0.179625	-0.635991	0.026212	-0.537019	0.0718008	0.634757	0.026596	-0.913123	3.36375e-05	-0.172179	0.592587	0.797479	0.00188839	0.732711	0.00671782	-0.582927	0.0466735	0.940456	5.33143e-06	0.267773	0.400098	0.436828	0.15564	-0.630655	0.0279015	0.771752	0.00327731	0.594832	0.0413381	0.713444	0.00917922	-0.526421	0.0787045	0.0352056	0.913504
ENSMUSG00000096910	33289544	33307241	zinc finger protein 955B [Source:MGI Symbol;Acc:MGI:4834573]	Zfp955b	protein_coding	1	yellow	-0.164618	0.609171	-0.18147	0.57245	0.478662	0.115428	-0.765388	0.00371692	-0.375302	0.229305	0.471511	0.121753	-0.814254	0.00126312	-0.138114	0.668608	0.868486	0.000247437	0.62081	0.0312228	-0.45045	0.141689	0.927424	1.40264e-05	0.285804	0.367841	0.335643	0.286156	-0.616884	0.0326234	0.731251	0.00688468	0.559328	0.0586512	0.613663	0.0338057	-0.545799	0.0664058	0.0867105	0.788736
ENSMUSG00000025184	42518759	42592343	R3H domain and coiled-coil containing 1 like [Source:MGI Symbol;Acc:MGI:1196316]	R3hcc1l	protein_coding	1	yellow	-0.26544	0.404374	0.199489	0.534204	0.338918	0.281184	-0.293545	0.354424	-0.691036	0.0128248	0.7717	0.00328069	-0.774156	0.00312192	0.0990115	0.759496	0.382618	0.21962	0.56374	0.0562649	-0.453244	0.138931	0.712615	0.00929846	-0.0742803	0.818539	0.507092	0.092436	-0.466767	0.126073	0.727832	0.00728752	0.22523	0.481542	0.584609	0.0458915	-0.624379	0.0299877	-0.0420321	0.896805
ENSMUSG00000001018	90488026	90491033	SNAP-associated protein [Source:MGI Symbol;Acc:MGI:1333745]	Snapin	protein_coding	-1	yellow	-0.317928	0.313904	-0.455427	0.1368	0.332966	0.290256	-0.538113	0.0711123	-0.213002	0.506258	-0.0314595	0.922682	-0.302823	0.338692	0.0175664	0.956788	0.35738	0.254087	0.0369416	0.909254	-0.056436	0.861703	0.373284	0.232021	0.0709249	0.826624	-0.220072	0.4919	-0.0181319	0.955398	0.153703	0.63341	0.290369	0.359897	0.0283935	0.9302	-0.0198582	0.951156	0.161233	0.616652
ENSMUSG00000021367	42301476	42307990	endothelin 1 [Source:MGI Symbol;Acc:MGI:95283]	Edn1	protein_coding	1	yellow	-0.0895458	0.781972	-0.100685	0.75554	0.0833509	0.796767	-0.144602	0.65388	-0.38595	0.215293	0.226097	0.479812	-0.563627	0.0563255	-0.361446	0.248332	0.0347039	0.914733	0.327591	0.298589	-0.456093	0.136154	0.366717	0.240988	0.258214	0.417758	-0.169049	0.599431	-0.374025	0.231021	0.0336683	0.917269	0.229155	0.473729	-0.099121	0.759237	-0.0521914	0.872026	-0.0156825	0.961419
ENSMUSG00000027803	57455649	57575910	WW domain containing transcription regulator 1 [Source:MGI Symbol;Acc:MGI:1917649]	Wwtr1	protein_coding	-1	yellow	0.0869894	0.78807	-0.228691	0.47465	0.277588	0.382366	-0.503988	0.0947821	-0.389486	0.210757	0.412707	0.182424	-0.800655	0.00175492	-0.427171	0.166042	0.705141	0.0104252	0.728092	0.00725619	-0.522488	0.0813778	0.856666	0.000372671	0.542776	0.0682305	0.379998	0.22306	-0.703572	0.0106742	0.425442	0.167949	0.5175	0.0848567	0.480832	0.113552	-0.35465	0.257994	0.226053	0.4799
ENSMUSG00000025451	119428601	119458218	polyadenylate binding protein-interacting protein 1 [Source:MGI Symbol;Acc:MGI:2384993]	Paip1	protein_coding	1	yellow	-0.159246	0.621057	0.471638	0.121639	0.201147	0.53074	-0.308775	0.328802	-0.162425	0.614013	0.252685	0.428146	-0.285898	0.367676	0.216319	0.499498	0.276049	0.385119	0.176445	0.583308	-0.197325	0.538738	0.372349	0.233284	-0.110492	0.732463	0.607039	0.0363326	-0.38901	0.211365	0.510826	0.0896666	-0.0505449	0.876035	0.436817	0.155652	-0.615166	0.0332501	-0.392294	0.207198
ENSMUSG00000114155	72048709	72049259	predicted gene 7986 [Source:MGI Symbol;Acc:MGI:3649097]	Gm7986	processed_pseudogene	-1	yellow	-0.622085	0.0307773	0.102201	0.751961	0.674309	0.0161733	-0.702635	0.010825	-0.76771	0.00355161	0.646445	0.0231185	-0.696404	0.0118679	0.417849	0.17649	0.336954	0.284159	0.27065	0.394859	-0.020232	0.950237	0.702871	0.0107868	-0.335959	0.285674	0.133818	0.678419	-0.31011	0.326606	0.744564	0.00547327	0.0108226	0.97337	0.236986	0.458315	-0.676933	0.0156096	0.149389	0.643086
ENSMUSG00000026478	153218922	153332786	laminin, gamma 1 [Source:MGI Symbol;Acc:MGI:99914]	Lamc1	protein_coding	-1	yellow	-0.211648	0.509028	0.344747	0.272458	0.402884	0.194104	-0.305441	0.334322	-0.76351	0.00385488	0.740259	0.00590322	-0.872414	0.000214097	-0.0160869	0.960425	0.250845	0.431631	0.66584	0.0180947	-0.648251	0.0226124	0.756817	0.0043781	0.0401217	0.901475	0.550255	0.0637776	-0.679213	0.0151319	0.565933	0.0551049	0.268527	0.398722	0.50175	0.0964986	-0.600324	0.0390292	-0.28444	0.370232
ENSMUSG00000105429	32799904	32800965	predicted gene 43692 [Source:MGI Symbol;Acc:MGI:5663829]	Gm43692	TEC	-1	yellow	0.109678	0.734371	-0.0115782	0.971512	0.360937	0.249049	-0.33037	0.294265	-0.269214	0.39747	0.377837	0.225921	-0.600257	0.0390567	-0.322141	0.307175	0.448052	0.144084	0.627022	0.029096	-0.381708	0.220812	0.592549	0.042326	0.361697	0.24798	0.0924725	0.775006	-0.683181	0.0143261	0.259769	0.41486	0.417265	0.177158	0.218991	0.494082	-0.276561	0.384202	0.114704	0.722613
ENSMUSG00000020412	4637747	4685699	activating signal cointegrator 1 complex subunit 2 [Source:MGI Symbol;Acc:MGI:1922702]	Ascc2	protein_coding	1	yellow	0.289019	0.362238	-0.348452	0.266992	0.422075	0.171704	-0.437085	0.155369	-0.0649101	0.841154	0.51709	0.085147	-0.558063	0.0593484	-0.262884	0.409083	0.714772	0.00899072	0.736602	0.00628801	-0.363729	0.245135	0.715943	0.00882706	0.432388	0.16037	0.134367	0.677164	-0.458412	0.133921	0.457756	0.13455	0.636145	0.0261643	0.53454	0.0733765	-0.205191	0.522333	0.321158	0.308738
ENSMUSG00000112105	3521922	3523268	ribosomal protein S7, pseudogene 2 [Source:MGI Symbol;Acc:MGI:3646014]	Rps7-ps2	processed_pseudogene	-1	yellow	-0.172453	0.591989	-0.17322	0.590316	0.630131	0.0280715	-0.675848	0.015841	-0.548058	0.0650642	0.663087	0.0187539	-0.654949	0.0208052	0.143978	0.655292	0.359487	0.251095	0.551076	0.0633018	-0.253814	0.426016	0.725572	0.00756329	0.014881	0.96339	0.258876	0.416524	-0.336321	0.285122	0.549672	0.0641174	0.415381	0.179323	0.421679	0.172149	-0.383548	0.218408	0.146232	0.650198
ENSMUSG00000026828	57997884	58045860	polypeptide N-acetylgalactosaminyltransferase 5 [Source:MGI Symbol;Acc:MGI:2179403]	Galnt5	protein_coding	1	yellow	0.273736	0.389277	-0.242833	0.446964	0.123884	0.701283	-0.43998	0.152338	-0.200926	0.531202	0.264077	0.406882	-0.756976	0.00436505	-0.617408	0.0324339	0.776655	0.00296648	0.799632	0.00179708	-0.831549	0.000799158	0.798462	0.00184629	0.73128	0.00688124	0.475715	0.118008	-0.678708	0.0152368	0.327877	0.298143	0.821351	0.00105284	0.696616	0.0118312	-0.111	0.731275	-0.130882	0.685152
ENSMUSG00000034371	10587791	10605654	triokinase, FMN cyclase [Source:MGI Symbol;Acc:MGI:2385084]	Tkfc	protein_coding	-1	yellow	-0.0539452	0.867758	0.115773	0.720122	0.632982	0.0271554	-0.331083	0.29316	-0.430553	0.162351	0.663036	0.0187663	-0.595712	0.0409618	0.071457	0.82534	0.194126	0.545473	0.566154	0.0549885	-0.189845	0.554538	0.623803	0.0301845	0.0207021	0.949082	0.0865739	0.789062	-0.614246	0.0335895	0.380913	0.221855	0.122106	0.7054	0.104664	0.746154	-0.553033	0.0621765	0.184135	0.566726
ENSMUSG00000033813	4857814	4897909	transcription elongation factor A (SII) 1 [Source:MGI Symbol;Acc:MGI:1196624]	Tcea1	protein_coding	1	yellow	-0.237968	0.4564	0.288736	0.362728	0.89075	0.000101764	-0.718462	0.00848225	-0.433668	0.158997	0.694039	0.0122827	-0.542383	0.0684704	0.451469	0.140678	0.435075	0.157497	0.504107	0.0946918	-0.0571157	0.860051	0.725195	0.00761009	-0.218401	0.495276	0.374949	0.229778	-0.540829	0.0694237	0.717589	0.0086005	0.179754	0.576149	0.450405	0.141733	-0.742788	0.00564766	-0.0416429	0.897756
ENSMUSG00000027206	125830304	125859139	COP9 signalosome subunit 2 [Source:MGI Symbol;Acc:MGI:1330276]	Cops2	protein_coding	-1	yellow	-0.495926	0.101062	0.00461014	0.988655	0.735888	0.00636523	-0.877541	0.000175973	-0.586764	0.0449035	0.605015	0.0371308	-0.678271	0.0153279	0.379522	0.223689	0.557221	0.0598155	0.360085	0.25025	-0.0738642	0.819541	0.794271	0.00203096	-0.211871	0.508572	0.243555	0.445572	-0.35828	0.252807	0.823077	0.00100605	0.219437	0.493182	0.431572	0.161248	-0.677778	0.0154314	0.101363	0.753938
ENSMUSG00000057691	48062395	48086593	zinc finger protein 746 [Source:MGI Symbol;Acc:MGI:1916478]	Zfp746	protein_coding	-1	yellow	0.207314	0.517942	0.305578	0.334094	0.544996	0.0668868	-0.386443	0.214657	-0.291637	0.357707	0.731134	0.00689813	-0.680333	0.0149011	-0.105148	0.745015	0.440967	0.151313	0.831222	0.000806471	-0.454677	0.13753	0.753162	0.00468559	0.238911	0.454563	0.498497	0.0990298	-0.869204	0.000241056	0.547154	0.0655985	0.36353	0.245414	0.499503	0.0982422	-0.646217	0.0231829	-0.0631154	0.845499
ENSMUSG00000024431	39410545	39519421	nuclear receptor subfamily 3, group C, member 1 [Source:MGI Symbol;Acc:MGI:95824]	Nr3c1	protein_coding	-1	yellow	-0.276098	0.385032	0.132811	0.680727	0.544234	0.0673463	-0.691265	0.0127827	-0.611594	0.034581	0.683749	0.0142133	-0.887245	0.000118447	0.0874041	0.78708	0.706598	0.010198	0.660307	0.0194371	-0.631766	0.0275436	0.928758	1.28132e-05	0.0610785	0.850435	0.55073	0.0635019	-0.514095	0.087288	0.85834	0.000352453	0.542408	0.068455	0.842668	0.000579317	-0.555819	0.0605985	-0.306223	0.333024
ENSMUSG00000021823	20929398	21033676	vinculin [Source:MGI Symbol;Acc:MGI:98927]	Vcl	protein_coding	1	yellow	-0.00479885	0.988191	-0.103135	0.749756	0.117831	0.715327	-0.213042	0.506175	-0.451633	0.140517	0.521779	0.0818663	-0.562101	0.0571432	-0.153861	0.633057	0.430214	0.162719	0.504465	0.094419	-0.197192	0.539019	0.575232	0.0503696	0.197409	0.538562	0.409249	0.186485	-0.389821	0.21033	0.464691	0.127994	0.171574	0.593906	0.402555	0.194502	-0.389862	0.210279	0.415075	0.179676
ENSMUSG00000049230	10088110	10092565	predicted gene 9833 [Source:MGI Symbol;Acc:MGI:3641855]	Gm9833	protein_coding	1	yellow	-0.284804	0.369594	0.389149	0.211188	0.798152	0.0018595	-0.497786	0.0995887	-0.462213	0.130312	0.710708	0.00957687	-0.603916	0.0375698	0.421241	0.172642	0.395524	0.203148	0.514594	0.0869286	-0.297109	0.348336	0.715086	0.00894667	-0.250475	0.432334	0.422564	0.171155	-0.595168	0.0411943	0.718944	0.00841747	0.207436	0.517691	0.516548	0.0855318	-0.80302	0.00166032	-0.284801	0.369598
ENSMUSG00000057396	67121660	67141787	zinc finger protein 759 [Source:MGI Symbol;Acc:MGI:2446280]	Zfp759	protein_coding	1	yellow	0.0381612	0.90627	0.29279	0.355721	0.493958	0.102635	-0.278691	0.3804	-0.476578	0.117249	0.756709	0.00438696	-0.756435	0.00440953	-0.0925441	0.774836	0.418553	0.175687	0.783754	0.0025568	-0.482448	0.112168	0.742205	0.00570583	0.150154	0.641366	0.417064	0.177388	-0.817934	0.00115042	0.561292	0.0575806	0.329185	0.296105	0.462259	0.130269	-0.634916	0.0265464	-0.0262409	0.935482
ENSMUSG00000036155	127205015	127488336	mannoside acetylglucosaminyltransferase 5 [Source:MGI Symbol;Acc:MGI:894701]	Mgat5	protein_coding	1	yellow	0.12999	0.6872	-0.0395998	0.902751	0.484552	0.110384	-0.471625	0.121651	-0.194855	0.543934	0.675647	0.0158842	-0.570235	0.0528772	-0.0138485	0.965928	0.63576	0.0262836	0.71146	0.00946626	-0.425577	0.1678	0.672314	0.0166117	0.151855	0.63755	0.311076	0.325021	-0.401793	0.195428	0.672012	0.0166788	0.64232	0.0243055	0.730083	0.00702035	-0.322967	0.305864	-0.0170596	0.958034
ENSMUSG00000033808	120355312	120404113	transmembrane protein 87A [Source:MGI Symbol;Acc:MGI:2441844]	Tmem87a	protein_coding	-1	yellow	-0.573982	0.0509889	0.0781993	0.809117	0.550634	0.0635579	-0.718345	0.00849808	-0.678818	0.0152138	0.561111	0.0576784	-0.74338	0.0055891	0.279162	0.379562	0.615482	0.0331343	0.342801	0.275353	-0.208989	0.514489	0.763097	0.00388572	-0.20255	0.527817	0.269765	0.396466	-0.354906	0.257625	0.847405	0.00050139	0.241433	0.449671	0.506742	0.0926991	-0.63364	0.0269469	0.00608472	0.985027
ENSMUSG00000019478	123805985	123835287	RAB4A, member RAS oncogene family [Source:MGI Symbol;Acc:MGI:105069]	Rab4a	protein_coding	1	yellow	-0.175558	0.585232	-0.154674	0.631241	0.381774	0.220725	-0.592666	0.042275	-0.5198	0.08324	0.55316	0.0621038	-0.827764	0.000887052	-0.130187	0.686749	0.817307	0.00116904	0.636655	0.0260071	-0.427234	0.165973	0.900752	6.40681e-05	0.248844	0.435437	0.423372	0.170252	-0.55382	0.0617278	0.728759	0.00717655	0.470589	0.122585	0.654736	0.0208608	-0.522065	0.0816694	0.198952	0.535328
ENSMUSG00000105865	72572174	72572432	predicted gene, 34144 [Source:MGI Symbol;Acc:MGI:5593303]	Gm34144	processed_pseudogene	1	yellow	-0.460606	0.13183	0.066654	0.836937	0.438233	0.154162	-0.479041	0.115099	-0.808515	0.0014556	0.644457	0.0236851	-0.851036	0.000447374	0.139761	0.664859	0.501321	0.0968298	0.48012	0.114166	-0.528616	0.0772392	0.781209	0.00269838	-0.0816493	0.800842	0.319093	0.312035	-0.273111	0.390404	0.720733	0.00818009	0.358144	0.252999	0.631122	0.0277508	-0.38845	0.212081	-0.172446	0.592004
ENSMUSG00000039536	166947549	166996299	staufen double-stranded RNA binding protein 1 [Source:MGI Symbol;Acc:MGI:1338864]	Stau1	protein_coding	-1	yellow	0.00365314	0.99101	0.0635484	0.84445	0.263253	0.408401	-0.341446	0.27738	-0.397294	0.20095	0.613074	0.0340251	-0.646113	0.0232125	-0.0487702	0.880359	0.592964	0.042145	0.637657	0.0256999	-0.449672	0.142463	0.726875	0.00740329	0.169082	0.599359	0.69189	0.0126687	-0.532623	0.0746119	0.670039	0.0171223	0.377876	0.225868	0.741731	0.00575338	-0.570299	0.0528444	0.0139895	0.965582
ENSMUSG00000038080	47043499	47085279	lysine (K)-specific demethylase 1B [Source:MGI Symbol;Acc:MGI:2145261]	Kdm1b	protein_coding	1	yellow	-0.128308	0.691071	0.127595	0.692713	0.357648	0.253705	-0.4912	0.104868	-0.603667	0.0376698	0.670862	0.0169364	-0.937094	6.97653e-06	-0.161377	0.616333	0.684639	0.0140379	0.74746	0.00519754	-0.69004	0.0130083	0.922384	1.9453e-05	0.249171	0.434813	0.558856	0.0589104	-0.660377	0.0194195	0.743557	0.00557158	0.480931	0.113467	0.747741	0.00517143	-0.544235	0.0673453	-0.152523	0.636052
ENSMUSG00000025982	54985169	55027481	splicing factor 3b, subunit 1 [Source:MGI Symbol;Acc:MGI:1932339]	Sf3b1	protein_coding	-1	yellow	-0.216601	0.498926	0.259859	0.414693	0.64058	0.0248194	-0.61244	0.0342623	-0.539153	0.0704625	0.748485	0.00510261	-0.722934	0.00789512	0.257761	0.418605	0.483177	0.111548	0.637395	0.0257801	-0.453766	0.138419	0.822414	0.00102383	-0.0872644	0.787413	0.7274	0.00733964	-0.657231	0.0202142	0.793102	0.00208494	0.387218	0.21366	0.721057	0.00813771	-0.81611	0.00120526	-0.265496	0.404271
ENSMUSG00000022255	34082694	34145624	metadherin [Source:MGI Symbol;Acc:MGI:1914404]	Mtdh	protein_coding	1	yellow	-0.3643	0.244339	0.384101	0.217688	0.798316	0.00185251	-0.595073	0.041235	-0.483011	0.111689	0.673549	0.0163393	-0.620445	0.0313511	0.409942	0.185666	0.32989	0.295009	0.41956	0.174542	-0.232729	0.466664	0.669149	0.0173252	-0.280735	0.376768	0.154191	0.63232	-0.471811	0.121484	0.705368	0.0103896	0.144859	0.653298	0.35615	0.255843	-0.668865	0.0173901	-0.26987	0.396275
ENSMUSG00000000861	24078056	24174123	B cell CLL/lymphoma 11A (zinc finger protein) [Source:MGI Symbol;Acc:MGI:106190]	Bcl11a	protein_coding	1	yellow	-0.494011	0.102593	0.28061	0.37699	0.622035	0.0307949	-0.636747	0.0259787	-0.690036	0.013009	0.691981	0.0126522	-0.681928	0.014577	0.396935	0.201394	0.310502	0.325962	0.330295	0.29438	-0.0808379	0.802786	0.703972	0.0106103	-0.294391	0.352974	0.296483	0.349402	-0.390992	0.208844	0.773787	0.00314543	-0.0533087	0.869306	0.315851	0.317251	-0.749207	0.00503646	0.0297913	0.926772
ENSMUSG00000033557	156678532	156719086	family with sequence similarity 20, member B [Source:MGI Symbol;Acc:MGI:2443990]	Fam20b	protein_coding	-1	yellow	-0.0669933	0.836116	-0.0331119	0.918633	0.364054	0.244683	-0.543141	0.0680083	-0.411698	0.183603	0.484826	0.110152	-0.80914	0.00143361	-0.165261	0.607754	0.76889	0.0034698	0.710228	0.00964797	-0.813096	0.00130027	0.862006	0.000311143	0.307072	0.331616	0.585767	0.045359	-0.545433	0.0666246	0.651964	0.021597	0.756417	0.00441096	0.898566	7.11688e-05	-0.358803	0.252064	-0.381166	0.221522
ENSMUSG00000041530	126435012	126468583	argonaute RISC catalytic subunit 1 [Source:MGI Symbol;Acc:MGI:2446630]	Ago1	protein_coding	-1	yellow	0.160246	0.618838	-0.221434	0.489156	0.152297	0.636558	-0.465927	0.126848	-0.140944	0.662171	0.294455	0.352864	-0.740905	0.00583708	-0.497925	0.0994794	0.83504	0.000724183	0.716015	0.00881698	-0.788394	0.00231342	0.792844	0.00209701	0.591789	0.0426587	0.403709	0.193105	-0.634063	0.0268137	0.479356	0.114826	0.786502	0.00241044	0.713149	0.0092215	-0.244686	0.443394	-0.159926	0.619548
ENSMUSG00000082382	127446562	127446916	predicted gene 14970 [Source:MGI Symbol;Acc:MGI:3705424]	Gm14970	processed_pseudogene	-1	yellow	-0.64847	0.0225514	0.244154	0.444418	0.63601	0.0262061	-0.653546	0.0211745	-0.812553	0.00131798	0.710746	0.00957126	-0.807501	0.00149184	0.426957	0.166278	0.463526	0.12908	0.362515	0.246833	-0.34037	0.278995	0.783234	0.00258524	-0.34512	0.271904	0.322337	0.306864	-0.305104	0.334882	0.895633	8.16565e-05	0.196724	0.540002	0.570866	0.0525556	-0.667095	0.0177998	-0.234103	0.463962
ENSMUSG00000019877	57515774	57532530	serine incorporator 1 [Source:MGI Symbol;Acc:MGI:1926228]	Serinc1	protein_coding	-1	yellow	-0.43899	0.153369	0.221628	0.488765	0.663245	0.0187155	-0.73687	0.00625918	-0.705097	0.0104322	0.739593	0.00597193	-0.873412	0.000206208	0.253034	0.427488	0.594101	0.0416527	0.556381	0.0602839	-0.398674	0.199246	0.913145	3.35967e-05	-0.122772	0.703855	0.468991	0.124036	-0.573534	0.0512121	0.898704	7.07046e-05	0.29616	0.349952	0.62406	0.0300967	-0.776136	0.00299828	-0.147929	0.646371
ENSMUSG00000026889	36116079	36136773	RNA binding motif protein 18 [Source:MGI Symbol;Acc:MGI:1915139]	Rbm18	protein_coding	-1	yellow	0.113511	0.7254	-0.41771	0.176648	0.197178	0.539047	-0.569985	0.0530046	-0.062137	0.847869	0.116984	0.717298	-0.597467	0.0402185	-0.502963	0.0955654	0.746889	0.00525112	0.557558	0.0596277	-0.502207	0.0961465	0.669016	0.0173555	0.579688	0.0482049	0.135711	0.674089	-0.58838	0.0441727	0.29964	0.344047	0.711995	0.00938824	0.382278	0.220065	-0.173798	0.589058	0.114345	0.723453
ENSMUSG00000114025	17902389	17904675	predicted gene, 49331 [Source:MGI Symbol;Acc:MGI:6121516]	Gm49331	unprocessed_pseudogene	1	yellow	0.328241	0.297575	0.191064	0.551951	0.365699	0.242397	-0.358802	0.252066	-0.0892364	0.78271	0.389083	0.211272	-0.587405	0.0446128	-0.317963	0.313848	0.54177	0.0688454	0.775904	0.00301255	-0.709718	0.00972385	0.662714	0.0188444	0.472912	0.120496	0.463258	0.129331	-0.721258	0.00811141	0.333182	0.289924	0.626583	0.0292428	0.628471	0.0286154	-0.241328	0.449872	-0.403228	0.193687
ENSMUSG00000027777	68064802	68626481	schwannomin interacting protein 1 [Source:MGI Symbol;Acc:MGI:1353557]	Schip1	protein_coding	1	yellow	-0.103787	0.748219	-0.237857	0.456615	-0.119054	0.712482	-0.240741	0.45101	-0.317719	0.31424	0.131526	0.683673	-0.540018	0.0699252	-0.352479	0.261126	0.647984	0.0226866	0.28565	0.36811	-0.307406	0.331063	0.508081	0.0916968	0.357553	0.253841	0.0866139	0.788966	-0.119617	0.711174	0.380958	0.221796	0.241363	0.449805	0.393864	0.205223	0.00330117	0.991876	0.253045	0.427465
ENSMUSG00000022664	45139573	45158706	solute carrier family 35, member A5 [Source:MGI Symbol;Acc:MGI:1921352]	Slc35a5	protein_coding	-1	yellow	-0.260811	0.412923	0.555369	0.0608513	0.8084	0.00145968	-0.488366	0.107197	-0.581808	0.0471988	0.761997	0.00396877	-0.59321	0.0420384	0.441502	0.150758	0.254223	0.425244	0.549746	0.0640745	-0.213171	0.505912	0.675644	0.0158847	-0.279806	0.378416	0.563864	0.0561988	-0.69155	0.0127307	0.663963	0.0185421	0.0980559	0.761758	0.456496	0.135765	-0.850221	0.00045908	-0.259107	0.416092
ENSMUSG00000036955	62538626	62578457	kinesin family binding protein [Source:MGI Symbol;Acc:MGI:1919570]	Kifbp	protein_coding	-1	yellow	0.132129	0.682289	-0.0294006	0.92773	0.159599	0.620275	-0.447929	0.144208	-0.0808047	0.802866	0.095397	0.768059	-0.525201	0.0795271	-0.361294	0.248546	0.70908	0.00981945	0.526882	0.0783953	-0.48187	0.112662	0.664293	0.018463	0.512386	0.0885262	0.561761	0.0573268	-0.706772	0.0101712	0.33392	0.288791	0.442677	0.149547	0.522992	0.0810322	-0.395559	0.203105	-0.105982	0.743052
ENSMUSG00000056492	43360451	43459557	adhesion G protein-coupled receptor F5 [Source:MGI Symbol;Acc:MGI:2182928]	Adgrf5	protein_coding	1	yellow	0.131133	0.684575	-0.114872	0.722221	0.360457	0.249725	-0.486708	0.108575	-0.415176	0.17956	0.420867	0.173064	-0.795827	0.00196085	-0.382355	0.219965	0.563899	0.0561802	0.792284	0.00212334	-0.735043	0.00645758	0.834144	0.000742889	0.527554	0.0779455	0.506759	0.0926862	-0.725496	0.00757271	0.32626	0.300674	0.661724	0.0190865	0.578453	0.048798	-0.271338	0.393611	-0.14119	0.661611
ENSMUSG00000022019	87416639	87545504	tudor domain containing 3 [Source:MGI Symbol;Acc:MGI:2444023]	Tdrd3	protein_coding	1	yellow	-0.0974389	0.763219	-0.269834	0.396341	0.214151	0.503911	-0.456359	0.135897	-0.471171	0.12206	0.284311	0.370458	-0.757613	0.00431323	-0.416072	0.178527	0.594874	0.0413205	0.558668	0.0590139	-0.487278	0.108099	0.706827	0.0101627	0.430791	0.162093	0.134396	0.677097	-0.557173	0.0598417	0.322706	0.306278	0.513885	0.0874393	0.312452	0.322772	-0.195588	0.542391	0.182717	0.569769
ENSMUSG00000031753	110846600	110882227	component of oligomeric golgi complex 4 [Source:MGI Symbol;Acc:MGI:2142808]	Cog4	protein_coding	1	yellow	-0.337902	0.282721	0.371739	0.234112	0.65664	0.020366	-0.470923	0.122283	-0.465136	0.127581	0.681398	0.014684	-0.630322	0.0280094	0.319278	0.311739	0.372361	0.233269	0.404207	0.192505	-0.160513	0.618245	0.659588	0.0196168	-0.235913	0.460413	0.121905	0.705866	-0.498332	0.0991596	0.731703	0.00683269	0.0112076	0.972423	0.292471	0.35627	-0.73134	0.00687435	-0.0638087	0.84382
ENSMUSG00000010608	83631236	83683123	RNA binding motif protein 25 [Source:MGI Symbol;Acc:MGI:1914289]	Rbm25	protein_coding	1	yellow	-0.0405977	0.900311	0.0354476	0.912912	0.6967	0.0118168	-0.591609	0.0427377	-0.18617	0.56237	0.558026	0.0593685	-0.605948	0.0367613	0.0943275	0.770598	0.620941	0.031177	0.625893	0.0294746	-0.442585	0.149642	0.755944	0.00445012	0.0882771	0.784997	0.258697	0.416858	-0.597921	0.0400278	0.625769	0.0295162	0.555962	0.0605181	0.568716	0.053656	-0.549355	0.0643024	-0.194765	0.544125
ENSMUSG00000023960	44078813	44086567	ectonucleotide pyrophosphatase/phosphodiesterase 5 [Source:MGI Symbol;Acc:MGI:1933830]	Enpp5	protein_coding	1	yellow	0.0400799	0.901577	-0.300148	0.34319	0.436515	0.15597	-0.612931	0.0340785	-0.471208	0.122026	0.502533	0.0958954	-0.807342	0.0014976	-0.320094	0.310434	0.598674	0.0397131	0.759036	0.00419902	-0.55113	0.0632701	0.84201	0.000590854	0.443062	0.149151	0.303371	0.337775	-0.610088	0.0351531	0.410842	0.184607	0.677433	0.015504	0.49198	0.104234	-0.251482	0.430423	0.145463	0.651933
ENSMUSG00000041272	6686353	6991557	thymocyte selection-associated high mobility group box [Source:MGI Symbol;Acc:MGI:2181659]	Tox	protein_coding	-1	yellow	0.149201	0.643507	-0.343672	0.274054	0.275869	0.385442	-0.581418	0.0473826	-0.258486	0.417251	0.407989	0.187978	-0.762687	0.00391648	-0.479511	0.114692	0.687582	0.0134697	0.714399	0.00904344	-0.498447	0.0990685	0.802048	0.00169871	0.568457	0.0537899	0.164735	0.608912	-0.616197	0.0328729	0.418759	0.175453	0.612021	0.03442	0.404967	0.19159	-0.236371	0.459518	0.268907	0.398028
ENSMUSG00000036304	43965033	43979791	zinc finger, DHHC domain containing 23 [Source:MGI Symbol;Acc:MGI:2685625]	Zdhhc23	protein_coding	-1	yellow	0.051934	0.872652	0.0564779	0.861601	0.264729	0.405682	-0.554412	0.0613921	-0.221738	0.488545	0.326774	0.299868	-0.67959	0.0150539	-0.281998	0.374533	0.608955	0.0355884	0.588021	0.0443344	-0.622556	0.0306141	0.715604	0.00887417	0.394515	0.204408	0.382699	0.219514	-0.570755	0.0526119	0.485222	0.109819	0.518439	0.0841941	0.568995	0.0535126	-0.298191	0.346499	-0.285661	0.368092
ENSMUSG00000066270	118837613	118837955	predicted gene 10157 [Source:MGI Symbol;Acc:MGI:3642264]	Gm10157	processed_pseudogene	-1	yellow	-0.696095	0.0119216	0.209653	0.513123	0.4974	0.099893	-0.505671	0.0935055	-0.832057	0.000787881	0.673255	0.0164038	-0.656325	0.0204473	0.487903	0.10758	0.342159	0.276312	0.184484	0.565977	-0.0232618	0.942795	0.614535	0.0334825	-0.455268	0.136954	0.208654	0.515179	-0.127238	0.693536	0.83773	0.000670222	-0.0888408	0.783653	0.371036	0.235067	-0.636793	0.0259648	0.100697	0.755511
ENSMUSG00000093384	68900171	68900449	predicted gene 20689 [Source:MGI Symbol;Acc:MGI:5313136]	Gm20689	processed_pseudogene	-1	yellow	0.0132327	0.967443	0.0364001	0.91058	0.525256	0.0794905	-0.565639	0.0552594	-0.246075	0.440728	0.513784	0.0875123	-0.638951	0.0253075	-0.0123079	0.969717	0.503205	0.0953805	0.651973	0.0215944	-0.621899	0.0308422	0.755405	0.00449502	0.190187	0.553813	0.557533	0.059642	-0.6447	0.0236155	0.54472	0.0670533	0.598737	0.039687	0.650978	0.0218632	-0.547212	0.0655643	-0.355976	0.256091
ENSMUSG00000027845	103800605	103809444	DNA cross-link repair 1B [Source:MGI Symbol;Acc:MGI:2156057]	Dclre1b	protein_coding	-1	yellow	-0.141452	0.661017	-0.173259	0.590231	0.431966	0.160824	-0.398922	0.19894	-0.263226	0.408451	0.445153	0.147014	-0.489489	0.10627	0.0841984	0.794739	0.566667	0.0547199	0.43019	0.162744	-0.419365	0.174763	0.531664	0.0752346	0.00781701	0.980764	0.0214275	0.947301	-0.0764435	0.813335	0.541442	0.0690468	0.613623	0.0338206	0.610334	0.0350592	-0.0740062	0.819199	-0.141574	0.66074
ENSMUSG00000022545	13109684	13150617	excision repair cross-complementing rodent repair deficiency, complementation group 4 [Source:MGI Symbol;Acc:MGI:1354163]	Ercc4	protein_coding	1	yellow	-0.0404505	0.900671	0.103463	0.748982	0.780146	0.00275923	-0.575391	0.0502909	-0.44684	0.145305	0.697342	0.0117063	-0.634398	0.0267084	0.114977	0.721978	0.276177	0.38489	0.673791	0.0162863	-0.316347	0.316451	0.686885	0.0136027	0.026889	0.933892	0.198454	0.536371	-0.617844	0.0322768	0.451411	0.140736	0.425922	0.167419	0.317772	0.314155	-0.467347	0.125539	-0.0412879	0.898624
ENSMUSG00000029090	49959956	50059006	adhesion G protein-coupled receptor A3 [Source:MGI Symbol;Acc:MGI:1917943]	Adgra3	protein_coding	-1	yellow	0.174789	0.586903	-0.1486	0.644861	-0.0822219	0.79947	-0.254064	0.425544	-0.225925	0.480154	0.270504	0.395124	-0.661268	0.0191989	-0.56139	0.0575276	0.746961	0.00524434	0.63356	0.0269723	-0.579394	0.0483457	0.651729	0.02166	0.578547	0.0487529	0.428796	0.164262	-0.569854	0.0530717	0.416013	0.178595	0.530575	0.0759468	0.593395	0.0419582	-0.206076	0.5205	0.119728	0.710916
ENSMUSG00000080845	102724402	102725749	predicted gene 9115 [Source:MGI Symbol;Acc:MGI:3648181]	Gm9115	processed_pseudogene	-1	yellow	-0.48416	0.110714	0.0442628	0.891356	0.693294	0.0124154	-0.74031	0.00589798	-0.584713	0.0458438	0.600088	0.0391267	-0.643762	0.0238858	0.408762	0.187061	0.413056	0.182017	0.314669	0.319165	-0.176651	0.582861	0.720987	0.0081469	-0.248876	0.435376	0.187766	0.558963	-0.221441	0.489141	0.739055	0.00602781	0.191495	0.551038	0.424167	0.169365	-0.547001	0.0656895	-0.069002	0.831264
ENSMUSG00000115602	73407489	73408239	predicted gene 7908 [Source:MGI Symbol;Acc:MGI:3645647]	Gm7908	processed_pseudogene	-1	yellow	-0.465837	0.126931	0.322121	0.307207	0.666138	0.0180244	-0.628437	0.0286263	-0.679212	0.015132	0.762549	0.00392693	-0.685594	0.0138517	0.49336	0.103117	0.355596	0.256636	0.411673	0.183633	-0.326906	0.299661	0.727144	0.00737068	-0.345363	0.271545	0.49226	0.104006	-0.295953	0.350304	0.858933	0.000345492	0.196166	0.541175	0.646619	0.0230693	-0.672879	0.0164866	-0.325133	0.302445
ENSMUSG00000105703	54292443	54297456	predicted gene 43305 [Source:MGI Symbol;Acc:MGI:5663442]	Gm43305	processed_transcript	-1	yellow	0.0687306	0.831919	-0.176052	0.58416	0.380146	0.222865	-0.546325	0.0660915	-0.228622	0.474786	0.259228	0.415867	-0.541112	0.0692495	-0.195411	0.542764	0.627878	0.0288113	0.56012	0.0582179	-0.297276	0.348052	0.727323	0.00734892	0.398544	0.199407	0.513755	0.0875334	-0.666871	0.0178522	0.345349	0.271564	0.401045	0.19634	0.436164	0.156342	-0.461281	0.131191	0.167133	0.603636
ENSMUSG00000058690	36874936	36968777	coiled-coil serine rich 2 [Source:MGI Symbol;Acc:MGI:101859]	Ccser2	protein_coding	-1	yellow	-0.254143	0.425395	0.130878	0.685162	0.624578	0.0299197	-0.745364	0.00539601	-0.551731	0.0629233	0.693206	0.0124312	-0.883366	0.000139327	0.0726599	0.822441	0.684258	0.0141129	0.673944	0.0162529	-0.515329	0.0864013	0.953378	1.60389e-06	0.0746189	0.817724	0.500164	0.0977269	-0.696169	0.0119087	0.839922	0.000628604	0.459397	0.13298	0.671082	0.0168867	-0.735957	0.00635777	-0.156166	0.627911
ENSMUSG00000064363	10167	11544	mitochondrially encoded NADH dehydrogenase 4 [Source:MGI Symbol;Acc:MGI:102498]	mt-Nd4	protein_coding	1	yellow	-0.377698	0.226106	0.22401	0.483983	0.608352	0.0358212	-0.653274	0.0212468	-0.720118	0.00826116	0.77098	0.00332842	-0.920325	2.20958e-05	0.176737	0.582673	0.613272	0.0339512	0.634118	0.0267963	-0.533297	0.0741762	0.936692	7.19737e-06	-0.0569733	0.860397	0.528414	0.0773732	-0.596685	0.0405485	0.88852	0.000112146	0.375721	0.228743	0.713048	0.00923609	-0.731384	0.0068693	-0.213867	0.50449
ENSMUSG00000098842	85012367	85012446	predicted gene, 27907 [Source:MGI Symbol;Acc:MGI:5531289]	Gm27907	miRNA	1	yellow	-0.317552	0.314509	-0.0149544	0.963209	0.503896	0.094852	-0.520137	0.0830048	-0.711412	0.00947335	0.733813	0.00659394	-0.743194	0.00560741	0.13542	0.674756	0.372053	0.233686	0.496328	0.100742	-0.145892	0.650965	0.733484	0.00663074	-0.0717103	0.82473	0.240836	0.450826	-0.415831	0.178805	0.659758	0.0195741	0.136934	0.671298	0.317641	0.314366	-0.577981	0.0490262	0.337462	0.283388
ENSMUSG00000021824	21031442	21052508	adaptor-related protein complex 3, mu 1 subunit [Source:MGI Symbol;Acc:MGI:1929212]	Ap3m1	protein_coding	-1	yellow	-0.609767	0.0352763	0.212531	0.507221	0.670951	0.0169163	-0.665514	0.0181718	-0.819035	0.00111823	0.705119	0.0104288	-0.781779	0.00266617	0.396863	0.201484	0.409284	0.186443	0.369189	0.237588	-0.178338	0.579207	0.779519	0.00279562	-0.310128	0.326577	0.299199	0.344792	-0.415398	0.179303	0.815956	0.00120998	0.0810665	0.802238	0.398328	0.199672	-0.747304	0.00521214	-0.00359492	0.991153
ENSMUSG00000037174	51252720	51340663	E74-like factor 2 [Source:MGI Symbol;Acc:MGI:1916507]	Elf2	protein_coding	-1	yellow	0.185658	0.563465	-0.189303	0.555691	0.320728	0.309422	-0.610816	0.0348757	-0.21854	0.494996	0.365889	0.242134	-0.741051	0.00582223	-0.381998	0.220431	0.869658	0.000237094	0.808305	0.00146307	-0.736514	0.00629752	0.876652	0.000182167	0.57241	0.0517753	0.63111	0.0277547	-0.695127	0.0120905	0.514991	0.0866434	0.841228	0.000604787	0.84605	0.000522806	-0.306547	0.332486	-0.160448	0.618391
ENSMUSG00000018166	128567523	128589652	erb-b2 receptor tyrosine kinase 3 [Source:MGI Symbol;Acc:MGI:95411]	Erbb3	protein_coding	-1	yellow	-0.104623	0.746251	0.2862	0.367148	0.333213	0.289876	-0.253811	0.426021	-0.362354	0.247058	0.56917	0.0534224	-0.672799	0.0165043	-0.0574896	0.859143	0.579983	0.048064	0.553325	0.0620097	-0.373323	0.231968	0.673872	0.0162685	0.0899506	0.781008	0.289856	0.360785	-0.632367	0.0273511	0.657214	0.0202186	0.183764	0.567521	0.46203	0.130484	-0.616822	0.0326459	-0.00918796	0.977392
ENSMUSG00000087672	80282444	80283006	predicted gene 15122 [Source:MGI Symbol;Acc:MGI:3705268]	Gm15122	antisense	-1	yellow	-0.0111006	0.972687	-0.0269609	0.933715	0.615517	0.0331215	-0.550363	0.0637152	-0.233321	0.4655	0.615932	0.0329695	-0.542758	0.0682412	0.177443	0.581144	0.735607	0.00639586	0.626758	0.029184	-0.340065	0.279454	0.751352	0.00484375	0.0554211	0.864169	0.441716	0.150537	-0.39243	0.207026	0.731375	0.00687032	0.547624	0.0653207	0.801562	0.00171815	-0.46852	0.124466	-0.0423241	0.896091
ENSMUSG00000007812	145231715	145247302	zinc finger protein 655 [Source:MGI Symbol;Acc:MGI:1919861]	Zfp655	protein_coding	1	yellow	0.161548	0.615954	-0.331649	0.292286	0.111534	0.730024	-0.464258	0.128398	-0.0641841	0.842911	0.0886672	0.784067	-0.513945	0.0873965	-0.391391	0.208338	0.803472	0.00164268	0.521662	0.0819469	-0.557359	0.0597384	0.654783	0.0208485	0.564494	0.0558641	0.384252	0.217492	-0.350069	0.264628	0.332908	0.290345	0.665463	0.0181838	0.675284	0.0159621	-0.0277437	0.931795	-0.0574541	0.85923
ENSMUSG00000021156	9684833	9765330	zinc finger, MYND domain containing 11 [Source:MGI Symbol;Acc:MGI:1913755]	Zmynd11	protein_coding	-1	yellow	-0.117578	0.715916	0.056358	0.861892	0.327711	0.298403	-0.539669	0.0701419	-0.484575	0.110364	0.459137	0.133228	-0.847138	0.000505564	-0.25365	0.426325	0.687268	0.0135295	0.63573	0.0262929	-0.524561	0.0799616	0.859531	0.000338584	0.337507	0.28332	0.405765	0.190632	-0.719442	0.00835084	0.592537	0.0423315	0.374021	0.231027	0.505993	0.0932627	-0.524626	0.079917	-0.000136043	0.999665
ENSMUSG00000065979	11803721	11909445	calcineurin-like phosphoesterase domain containing 1 [Source:MGI Symbol;Acc:MGI:2443300]	Cpped1	protein_coding	-1	yellow	-0.419691	0.174394	-0.18158	0.572215	0.486322	0.108897	-0.698745	0.0114678	-0.665397	0.0181995	0.529622	0.0765738	-0.813005	0.00130323	0.0439215	0.892189	0.684855	0.0139958	0.456164	0.136086	-0.310295	0.326302	0.823025	0.00100745	0.0439961	0.892007	0.132194	0.682141	-0.302418	0.339371	0.715607	0.00887378	0.398444	0.19953	0.498061	0.0993723	-0.370926	0.235218	0.170534	0.596179
ENSMUSG00000026829	28496891	28505415	globoside alpha-1,3-N-acetylgalactosaminyltransferase 1 [Source:MGI Symbol;Acc:MGI:2449143]	Gbgt1	protein_coding	1	yellow	0.216309	0.499518	0.0370209	0.90906	0.0727827	0.822145	-0.163435	0.61178	-0.335383	0.286553	0.497994	0.099425	-0.633105	0.0271162	-0.379773	0.223356	0.321295	0.308519	0.649318	0.022317	-0.492231	0.10403	0.589929	0.0434802	0.412572	0.182581	0.41014	0.185434	-0.568928	0.0535468	0.318944	0.312274	0.275531	0.386048	0.375514	0.229021	-0.292482	0.356251	0.104835	0.745752
ENSMUSG00000024259	31556111	31609911	solute carrier family 25, member 46 [Source:MGI Symbol;Acc:MGI:1914703]	Slc25a46	protein_coding	-1	yellow	-0.179325	0.577075	0.289539	0.361335	0.393555	0.205611	-0.596177	0.0407638	-0.417537	0.176846	0.420162	0.17386	-0.702951	0.0107739	-0.0250203	0.938478	0.527829	0.0777626	0.522776	0.08118	-0.5906	0.0431825	0.709312	0.00978452	0.126076	0.696216	0.505396	0.0937134	-0.57491	0.0505283	0.612131	0.0343785	0.431504	0.161322	0.624726	0.0298695	-0.467947	0.12499	-0.475946	0.117804
ENSMUSG00000058317	18573575	18894267	ubiquitin-conjugating enzyme E2E 2 [Source:MGI Symbol;Acc:MGI:2384997]	Ube2e2	protein_coding	-1	yellow	-0.390013	0.210086	-0.0013545	0.996667	0.429558	0.163432	-0.510304	0.09005	-0.47665	0.117185	0.324201	0.303913	-0.445564	0.146596	0.208655	0.515176	0.369864	0.236665	0.17146	0.594155	0.177274	0.58151	0.54435	0.0672759	-0.107776	0.738835	0.209059	0.514344	-0.393614	0.205537	0.470761	0.12243	-0.138567	0.667575	0.0730491	0.821504	-0.638793	0.0253552	0.406612	0.189618
ENSMUSG00000025812	127063893	127612286	par-3 family cell polarity regulator [Source:MGI Symbol;Acc:MGI:2135608]	Pard3	protein_coding	1	yellow	0.107786	0.738811	0.35089	0.263432	0.581691	0.0472536	-0.4901	0.105768	-0.241761	0.449036	0.679259	0.0151223	-0.658002	0.0200172	0.0297549	0.926861	0.600527	0.0389456	0.760846	0.00405705	-0.491147	0.104912	0.792077	0.00213313	0.157146	0.625727	0.590484	0.0432339	-0.771138	0.00331788	0.698456	0.0115165	0.41447	0.180375	0.702173	0.0108998	-0.678794	0.0152189	-0.255844	0.422197
ENSMUSG00000022419	55112317	55259271	DEP domain containing MTOR-interacting protein [Source:MGI Symbol;Acc:MGI:2146322]	Deptor	protein_coding	1	yellow	0.12055	0.709008	-0.387061	0.213861	0.00408514	0.989947	-0.339416	0.280432	-0.279903	0.378244	0.280099	0.377896	-0.757915	0.00428875	-0.627733	0.0288593	0.756872	0.00437356	0.652641	0.0214155	-0.630335	0.0280053	0.714054	0.00909228	0.629884	0.0281519	0.140753	0.662604	-0.497507	0.0998084	0.363148	0.245947	0.656095	0.0205068	0.482007	0.112545	-0.0597574	0.853639	0.22069	0.490654
ENSMUSG00000021519	66906968	66933088	mitochondrial transcription termination factor 3 [Source:MGI Symbol;Acc:MGI:1913660]	Mterf3	protein_coding	-1	yellow	-0.0563088	0.862012	-0.126453	0.695347	0.682366	0.0144889	-0.808345	0.00146165	-0.443392	0.148812	0.623046	0.0304447	-0.741364	0.00579048	0.00825975	0.979675	0.581157	0.0475061	0.694921	0.0121267	-0.325572	0.301755	0.892192	9.54605e-05	0.210735	0.510901	0.420804	0.173135	-0.63788	0.025632	0.60516	0.0370732	0.487178	0.108183	0.50582	0.0933928	-0.556325	0.060315	0.13622	0.672929
ENSMUSG00000022307	41447482	41861048	oxidation resistance 1 [Source:MGI Symbol;Acc:MGI:2179326]	Oxr1	protein_coding	1	yellow	0.346967	0.269175	-0.043244	0.893844	0.330444	0.29415	-0.556725	0.0600913	-0.148148	0.645878	0.419948	0.174102	-0.642927	0.0241282	-0.363298	0.245737	0.672111	0.0166568	0.840977	0.000609304	-0.626597	0.029238	0.802439	0.00168319	0.576683	0.0496571	0.748662	0.00508632	-0.797147	0.00190281	0.423605	0.169991	0.685787	0.0138142	0.735176	0.00644303	-0.392948	0.206374	-0.121244	0.707396
ENSMUSG00000025094	59260896	59296012	solute carrier family 18 (vesicular monoamine), member 2 [Source:MGI Symbol;Acc:MGI:106677]	Slc18a2	protein_coding	1	yellow	-0.164416	0.609615	-0.061289	0.849924	0.405103	0.191426	-0.530885	0.0757437	-0.678229	0.0153367	0.62687	0.0291468	-0.884585	0.000132477	-0.190016	0.554176	0.546322	0.0660932	0.675218	0.0159765	-0.42401	0.16954	0.847776	0.000495656	0.246492	0.43993	0.306425	0.332688	-0.62246	0.0306473	0.569812	0.0530932	0.371201	0.234843	0.418145	0.176152	-0.457678	0.134625	0.226392	0.479222
ENSMUSG00000026915	37483228	37703859	spermatid perinuclear RNA binding protein [Source:MGI Symbol;Acc:MGI:104626]	Strbp	protein_coding	-1	yellow	0.0369935	0.909127	-0.127336	0.693312	0.366877	0.240768	-0.621927	0.0308324	-0.41447	0.180376	0.511881	0.0888938	-0.857162	0.000366589	-0.290698	0.359329	0.82128	0.00105479	0.787054	0.0023818	-0.707704	0.010028	0.9287	1.28644e-05	0.451202	0.140943	0.512714	0.0882872	-0.599007	0.0395743	0.626468	0.0292813	0.715835	0.00884206	0.807879	0.00147825	-0.318509	0.312971	-0.106741	0.741268
ENSMUSG00000071267	21926960	21962464	zinc finger protein 942 [Source:MGI Symbol;Acc:MGI:1920483]	Zfp942	protein_coding	-1	yellow	-0.205909	0.520845	-0.00561597	0.98618	0.606465	0.0365579	-0.794321	0.00202868	-0.550731	0.0635015	0.662643	0.0188619	-0.867963	0.000252167	0.0319983	0.921362	0.776865	0.00295365	0.695273	0.012065	-0.47122	0.122016	0.974859	7.58366e-08	0.151594	0.638133	0.504234	0.0945947	-0.605644	0.0368817	0.825488	0.000943389	0.527132	0.0782276	0.737135	0.00623075	-0.607285	0.0362365	-0.0284043	0.930174
ENSMUSG00000026037	58462771	58505109	origin recognition complex, subunit 2 [Source:MGI Symbol;Acc:MGI:1328306]	Orc2	protein_coding	-1	yellow	-0.439176	0.153176	0.133626	0.67886	0.628781	0.0285133	-0.711851	0.00940923	-0.492988	0.103417	0.469316	0.123739	-0.568096	0.0539766	0.396831	0.201523	0.464388	0.128276	0.332374	0.291167	-0.416597	0.177924	0.646208	0.0231855	-0.229971	0.472112	0.413922	0.181011	-0.215333	0.501503	0.703409	0.0107003	0.460121	0.13229	0.687736	0.0134404	-0.435572	0.156969	-0.500581	0.0974029
ENSMUSG00000029569	13580687	13608100	transmembrane protein 168 [Source:MGI Symbol;Acc:MGI:1921794]	Tmem168	protein_coding	-1	yellow	-0.198038	0.537243	0.144352	0.654445	0.638183	0.02554	-0.774293	0.00311327	-0.593488	0.0419177	0.686213	0.0137318	-0.869508	0.0002384	0.0621748	0.847778	0.660849	0.0193024	0.722249	0.00798302	-0.539348	0.070341	0.947656	2.83332e-06	0.115384	0.721029	0.59979	0.0392496	-0.679975	0.0149746	0.784434	0.00251998	0.52378	0.0804928	0.738703	0.00606467	-0.637387	0.0257824	-0.204769	0.523208
ENSMUSG00000051177	134786067	135475258	phospholipase C, beta 1 [Source:MGI Symbol;Acc:MGI:97613]	Plcb1	protein_coding	1	yellow	0.332725	0.290627	0.0413853	0.898386	0.155387	0.629649	-0.311059	0.32505	-0.245771	0.441312	0.479946	0.114316	-0.66988	0.0171584	-0.427091	0.16613	0.540581	0.0695772	0.813383	0.00129098	-0.642302	0.0243108	0.722863	0.00790412	0.545651	0.066494	0.693461	0.0123857	-0.755849	0.00445804	0.390282	0.209744	0.52716	0.0782088	0.645101	0.0235004	-0.370619	0.235635	-0.0552664	0.864545
ENSMUSG00000027427	144527718	144541995	polymerase (RNA) III (DNA directed) polypeptide F [Source:MGI Symbol;Acc:MGI:1924086]	Polr3f	protein_coding	1	yellow	0.121901	0.705875	-0.102153	0.752073	0.550181	0.0638209	-0.585652	0.0454118	-0.157096	0.625839	0.388755	0.21169	-0.612645	0.0341854	-0.174768	0.586947	0.708548	0.00989972	0.710802	0.00956294	-0.581243	0.0474651	0.744934	0.00543739	0.361504	0.248251	0.293448	0.354591	-0.588997	0.0438959	0.443197	0.149013	0.766939	0.00360592	0.642902	0.0241354	-0.241023	0.450463	-0.212272	0.507752
ENSMUSG00000067430	33016863	33033402	zinc finger protein 763 [Source:MGI Symbol;Acc:MGI:1920701]	Zfp763	protein_coding	-1	yellow	-0.299306	0.34461	0.300886	0.341946	0.275631	0.385869	-0.321774	0.307758	-0.395126	0.203644	0.499843	0.0979767	-0.614982	0.0333178	0.13099	0.684904	0.314769	0.319003	0.351141	0.263066	-0.655841	0.0205726	0.519173	0.0836789	-0.130606	0.685785	0.291699	0.3576	-0.254522	0.424681	0.64828	0.0226043	0.362993	0.246163	0.595725	0.0409565	-0.383298	0.218733	-0.634452	0.0266916
ENSMUSG00000041685	98723403	98815449	FCH domain only 2 [Source:MGI Symbol;Acc:MGI:3505790]	Fcho2	protein_coding	-1	yellow	-0.250566	0.432161	0.108045	0.738203	0.491765	0.104408	-0.608696	0.0356881	-0.621726	0.0309025	0.712928	0.00925325	-0.895346	8.27417e-05	0.00564819	0.986101	0.690581	0.0129083	0.663681	0.0186102	-0.447825	0.144312	0.929401	1.22586e-05	0.0984914	0.760727	0.48861	0.106995	-0.660507	0.0193872	0.832869	0.000770136	0.349709	0.265153	0.634976	0.0265275	-0.714824	0.00898353	0.0424252	0.895844
ENSMUSG00000042408	127077383	127124372	zinc finger, MYM-type 6 [Source:MGI Symbol;Acc:MGI:106505]	Zmym6	protein_coding	1	yellow	0.257149	0.419751	-0.176943	0.582228	0.303418	0.337697	-0.506161	0.0931355	-0.251413	0.430554	0.385473	0.21591	-0.721288	0.00810753	-0.441943	0.150303	0.731228	0.0068873	0.830646	0.000819479	-0.621306	0.0310491	0.847831	0.000494814	0.616909	0.0326141	0.633593	0.026962	-0.822123	0.0010317	0.383701	0.218209	0.677157	0.0155623	0.646837	0.023008	-0.384159	0.217613	0.0481269	0.881928
ENSMUSG00000023072	35397035	35438689	centrosomal protein 89 [Source:MGI Symbol;Acc:MGI:1919390]	Cep89	protein_coding	1	yellow	0.212952	0.50636	-0.291416	0.358089	0.305696	0.333898	-0.185315	0.564198	-0.16988	0.59761	0.379505	0.223711	-0.480748	0.113625	-0.306101	0.333226	0.372011	0.233743	0.560927	0.0577786	-0.257854	0.418431	0.533507	0.0740402	0.390698	0.209216	-0.0504224	0.876333	-0.434141	0.158491	0.148173	0.645821	0.329119	0.296207	0.134281	0.67736	-0.129599	0.6881	0.396806	0.201555
ENSMUSG00000087034	60231483	60232212	CBFA2/RUNX1 translocation partner 2, pseudogene 1 [Source:MGI Symbol;Acc:MGI:1333788]	Cbfa2t2-ps1	processed_pseudogene	1	yellow	0.186538	0.561583	0.00698142	0.98282	0.486815	0.108485	-0.389522	0.210712	-0.310599	0.325802	0.785067	0.00248603	-0.66535	0.0182107	-0.102673	0.750845	0.526361	0.0787452	0.801451	0.00172265	-0.370119	0.236317	0.736873	0.00625886	0.222603	0.486806	0.322093	0.30725	-0.585102	0.0456643	0.608787	0.035653	0.459505	0.132877	0.553466	0.0619291	-0.451569	0.14058	0.205969	0.520721
ENSMUSG00000041781	101975988	102006424	cleavage and polyadenylation specific factor 2 [Source:MGI Symbol;Acc:MGI:1861601]	Cpsf2	protein_coding	1	yellow	-0.418893	0.1753	0.0659754	0.838577	0.7552	0.00451219	-0.818336	0.00113859	-0.568635	0.053698	0.687988	0.0133928	-0.727053	0.0073817	0.342862	0.275262	0.56028	0.0581304	0.472898	0.120509	-0.183213	0.568705	0.845928	0.000524753	-0.174949	0.586554	0.360087	0.250247	-0.513683	0.0875857	0.846205	0.000520321	0.271068	0.394101	0.492774	0.10359	-0.796103	0.00194859	0.0379101	0.906884
ENSMUSG00000031309	159210307	159368244	ribosomal protein S6 kinase polypeptide 3 [Source:MGI Symbol;Acc:MGI:104557]	Rps6ka3	protein_coding	1	yellow	-0.453865	0.138323	0.0302325	0.92569	0.558324	0.0592041	-0.666965	0.0178303	-0.55527	0.060907	0.6402	0.0249326	-0.737312	0.00621188	0.293578	0.354368	0.61442	0.0335251	0.428003	0.165129	-0.473118	0.120312	0.764781	0.00376112	-0.186711	0.561215	0.292514	0.356196	-0.217662	0.496774	0.885201	0.000129116	0.486235	0.10897	0.738567	0.006079	-0.488374	0.10719	-0.286699	0.366276
ENSMUSG00000038587	4266380	4359470	A kinase (PRKA) anchor protein (gravin) 12 [Source:MGI Symbol;Acc:MGI:1932576]	Akap12	protein_coding	1	yellow	0.423964	0.169591	-0.157926	0.623991	0.08443	0.794185	-0.250127	0.432994	-0.159536	0.620413	0.267006	0.401501	-0.608629	0.0357141	-0.602531	0.0381276	0.487865	0.107612	0.772143	0.00325162	-0.692607	0.0125389	0.657735	0.0200851	0.727187	0.00736544	0.528836	0.0770934	-0.698541	0.0115022	0.113394	0.725673	0.596365	0.0406843	0.497245	0.100015	-0.112048	0.728821	-0.0307096	0.924521
ENSMUSG00000117038	74026998	74079046	predicted gene, 49880 [Source:MGI Symbol;Acc:MGI:6270561]	Gm49880	processed_transcript	-1	yellow	-0.186048	0.562631	0.33049	0.294079	0.15459	0.631429	-0.314801	0.318951	-0.436294	0.156204	0.500153	0.0977357	-0.725121	0.00761921	-0.0716742	0.824817	0.602444	0.038163	0.514882	0.0867217	-0.640846	0.0247404	0.678006	0.0153833	0.0932073	0.773259	0.574084	0.0509379	-0.514362	0.0870954	0.737801	0.00615978	0.344472	0.272866	0.746023	0.00533304	-0.533603	0.0739789	-0.392269	0.20723
ENSMUSG00000020063	63319005	63381704	sirtuin 1 [Source:MGI Symbol;Acc:MGI:2135607]	Sirt1	protein_coding	-1	yellow	0.0497735	0.877914	-0.302244	0.339663	0.238026	0.456287	-0.565056	0.0555668	-0.274868	0.38724	0.223136	0.485735	-0.766034	0.00367036	-0.487671	0.107773	0.779173	0.00281585	0.642724	0.0241873	-0.65412	0.0210227	0.80204	0.00169905	0.590063	0.0434204	0.214287	0.503636	-0.576779	0.0496106	0.36825	0.238876	0.692232	0.0126067	0.514434	0.0870442	-0.135797	0.673894	-0.00912127	0.977556
ENSMUSG00000026705	161088375	161131511	kelch-like 20 [Source:MGI Symbol;Acc:MGI:2444855]	Klhl20	protein_coding	-1	yellow	-0.0145285	0.964256	-0.203105	0.526662	0.605524	0.0369292	-0.696805	0.0117987	-0.423585	0.170013	0.559219	0.0587113	-0.740239	0.00590523	-0.113692	0.724977	0.547318	0.0655019	0.711225	0.0095008	-0.405987	0.190366	0.851824	0.000436268	0.289312	0.361729	0.370725	0.235491	-0.682253	0.0145115	0.484879	0.110108	0.553614	0.0618448	0.444009	0.148181	-0.491803	0.104378	0.141198	0.661593
ENSMUSG00000042198	3938888	3951046	coiled-coil-helix-coiled-coil-helix domain containing 7 [Source:MGI Symbol;Acc:MGI:1913683]	Chchd7	protein_coding	1	yellow	-0.405955	0.190403	-0.118228	0.714403	0.0111822	0.972486	-0.194738	0.544182	-0.586532	0.0450093	0.264287	0.406495	-0.507998	0.091759	-0.021039	0.948255	0.301616	0.340717	0.0754369	0.815756	-0.125683	0.697123	0.375279	0.229336	-0.0278649	0.931497	-0.154491	0.63165	0.162363	0.61415	0.382912	0.219236	-0.0287983	0.929207	0.170783	0.595634	0.0356667	0.912375	0.234713	0.462764
ENSMUSG00000099858	153619604	153620673	predicted gene 6652 [Source:MGI Symbol;Acc:MGI:3647244]	Gm6652	processed_pseudogene	-1	yellow	-0.10304	0.749981	-0.26332	0.408277	0.466653	0.126178	-0.659294	0.0196904	-0.372272	0.233389	0.508576	0.0913287	-0.740399	0.00588879	-0.0754872	0.815635	0.790113	0.0022279	0.64948	0.0222725	-0.592109	0.0425183	0.847542	0.000499264	0.241454	0.44963	0.397095	0.201196	-0.409443	0.186255	0.67279	0.0165063	0.75742	0.00432889	0.796343	0.00193797	-0.329087	0.296257	-0.0919997	0.77613
ENSMUSG00000028496	87769925	88033364	myeloid/lymphoid or mixed-lineage leukemia; translocated to, 3 [Source:MGI Symbol;Acc:MGI:1917372]	Mllt3	protein_coding	-1	yellow	-0.373444	0.231803	0.51819	0.0843693	0.65277	0.021381	-0.375762	0.228688	-0.696499	0.0118515	0.855279	0.000390097	-0.787399	0.00236406	0.348282	0.267242	0.394675	0.204208	0.566595	0.0547578	-0.443497	0.148705	0.757574	0.00431633	-0.271307	0.393666	0.405854	0.190525	-0.53546	0.072789	0.838341	0.000658421	0.161123	0.616894	0.601103	0.0387094	-0.741125	0.00581469	-0.325874	0.30128
ENSMUSG00000055717	103650228	103704907	SLAIN motif family, member 1 [Source:MGI Symbol;Acc:MGI:2145578]	Slain1	protein_coding	1	yellow	0.250611	0.432075	-0.214814	0.50256	0.231484	0.469121	-0.509607	0.0905645	-0.158915	0.621793	0.341799	0.27685	-0.747113	0.00523007	-0.488132	0.107391	0.817648	0.00115889	0.81067	0.00138086	-0.826047	0.00092932	0.837597	0.000672811	0.641223	0.0246285	0.520533	0.0827297	-0.668025	0.0175838	0.444918	0.147253	0.852541	0.000426358	0.789318	0.00226713	-0.212259	0.507777	-0.197639	0.53808
ENSMUSG00000087206	19809609	19811872	predicted gene 16175 [Source:MGI Symbol;Acc:MGI:3801805]	Gm16175	antisense	1	yellow	-0.107378	0.73977	-0.145319	0.65226	0.00936227	0.976963	-0.323088	0.305673	-0.457401	0.134891	0.38552	0.215849	-0.717152	0.00866023	-0.359518	0.251052	0.583259	0.0465183	0.467326	0.125559	-0.438307	0.154085	0.6026	0.0381	0.315134	0.318411	0.0706379	0.827316	-0.268968	0.397917	0.498276	0.0992034	0.366197	0.241707	0.417629	0.176741	-0.0907277	0.779157	0.186264	0.562168
ENSMUSG00000013973	171329145	171342331	death effector domain-containing [Source:MGI Symbol;Acc:MGI:1333874]	Dedd	protein_coding	1	yellow	-0.160936	0.617308	0.172331	0.592255	0.576485	0.0497539	-0.502118	0.0962144	-0.402487	0.194584	0.692912	0.012484	-0.645055	0.0235137	0.161542	0.615967	0.660746	0.019328	0.595622	0.0410003	-0.221668	0.488685	0.750736	0.00489851	-0.0410732	0.899148	0.389294	0.211003	-0.591659	0.0427156	0.800239	0.00177198	0.305032	0.335003	0.587865	0.0444047	-0.713741	0.0091368	0.103953	0.747828
ENSMUSG00000032558	104002544	104043818	nephronophthisis 3 (adolescent) [Source:MGI Symbol;Acc:MGI:1921275]	Nphp3	protein_coding	1	yellow	0.328424	0.297289	-0.291181	0.358494	0.18917	0.555974	-0.453515	0.138665	0.0310582	0.923666	0.0419933	0.8969	-0.420115	0.173913	-0.446791	0.145354	0.614373	0.0335422	0.56534	0.0554169	-0.428628	0.164445	0.610394	0.0350365	0.654769	0.0208523	0.447385	0.144755	-0.596569	0.0405976	0.112897	0.726835	0.544914	0.0669367	0.426925	0.166313	-0.150348	0.64093	0.0591369	0.855144
ENSMUSG00000031924	107150640	107187471	cytochrome b5 type B [Source:MGI Symbol;Acc:MGI:1913677]	Cyb5b	protein_coding	1	yellow	0.22008	0.491883	-0.428353	0.164746	0.244784	0.443206	-0.263046	0.408784	0.13	0.687179	-0.00240043	0.994093	-0.122425	0.704661	-0.15777	0.624338	0.489998	0.105852	0.329542	0.29555	-0.228882	0.47427	0.30975	0.327198	0.335425	0.286488	0.0841669	0.794814	-0.10014	0.756827	0.0414488	0.89823	0.585053	0.0456869	0.389714	0.210467	0.161615	0.615806	0.0662368	0.837945
ENSMUSG00000028134	119718742	119784466	polypyrimidine tract binding protein 2 [Source:MGI Symbol;Acc:MGI:1860489]	Ptbp2	protein_coding	-1	yellow	-0.0977277	0.762535	-0.346659	0.269629	0.524231	0.0801856	-0.719667	0.00832086	-0.309776	0.327154	0.385484	0.215895	-0.612081	0.0343974	-0.126076	0.696216	0.511449	0.0892099	0.474717	0.11889	-0.118987	0.712639	0.716211	0.00878987	0.254885	0.423999	0.00661331	0.983726	-0.510925	0.0895934	0.40501	0.191538	0.348353	0.267137	0.129953	0.687287	-0.401344	0.195975	0.421482	0.17237
ENSMUSG00000073569	45285836	45286120	predicted gene 10540 [Source:MGI Symbol;Acc:MGI:3642696]	Gm10540	processed_pseudogene	-1	yellow	-0.321809	0.307703	-0.0670553	0.835966	0.580723	0.047712	-0.762099	0.00396095	-0.319821	0.31087	0.472218	0.121118	-0.608212	0.0358755	0.255491	0.422859	0.713917	0.00911174	0.405533	0.190909	-0.406262	0.190036	0.755783	0.0044635	-0.0649696	0.84101	0.344205	0.273262	-0.258598	0.417042	0.80619	0.00153972	0.538835	0.0706609	0.745479	0.00538501	-0.478393	0.115662	-0.269423	0.397089
ENSMUSG00000072847	61864568	61868058	RIKEN cDNA A530017D24 gene [Source:MGI Symbol;Acc:MGI:2144320]	A530017D24Rik	lincRNA	-1	yellow	-0.348408	0.267057	-0.108778	0.736483	0.637227	0.0258314	-0.769158	0.00345142	-0.506535	0.0928542	0.684017	0.0141602	-0.670812	0.0169475	0.272888	0.390807	0.53089	0.0757401	0.422087	0.17169	-0.108483	0.737176	0.761872	0.00397827	-0.132637	0.681125	0.139956	0.664415	-0.268294	0.399148	0.807096	0.00150649	0.267357	0.400858	0.432543	0.160203	-0.556563	0.0601818	0.22244	0.487133
ENSMUSG00000098544	94586137	94586199	microRNA 7211 [Source:MGI Symbol;Acc:MGI:5530918]	Mir7211	miRNA	-1	yellow	-0.202217	0.528509	0.199418	0.534352	0.245641	0.441561	0.0526239	0.870973	-0.385403	0.216	0.460708	0.131734	-0.149714	0.642354	0.424581	0.168905	-0.0130861	0.967803	0.106738	0.741274	-0.0535061	0.868826	0.141638	0.660595	-0.363884	0.244919	0.165399	0.60745	0.245124	0.442553	0.343005	0.275049	-0.0400088	0.901751	0.369354	0.237363	-0.0714531	0.82535	-0.115817	0.720017
ENSMUSG00000047248	100372233	100470152	C2 calcium-dependent domain containing 3 [Source:MGI Symbol;Acc:MGI:2142166]	C2cd3	protein_coding	1	yellow	-0.115527	0.720695	0.297336	0.347951	0.696112	0.0119186	-0.520944	0.082444	-0.355839	0.256288	0.786356	0.00241801	-0.600251	0.0390593	0.297751	0.347246	0.356417	0.255461	0.600907	0.0387895	-0.456174	0.136075	0.643671	0.023912	-0.169721	0.597959	0.306955	0.33181	-0.413362	0.181662	0.733827	0.00659229	0.461207	0.131261	0.632271	0.0273817	-0.513576	0.0876624	-0.397286	0.20096
ENSMUSG00000075327	4367075	4388108	zinc finger and BTB domain containing 2 [Source:MGI Symbol;Acc:MGI:2685949]	Zbtb2	protein_coding	-1	yellow	0.148958	0.644055	-0.10734	0.73986	0.235668	0.460893	-0.518989	0.0838077	-0.143196	0.657063	0.277192	0.383073	-0.52651	0.0786448	-0.242426	0.44775	0.816428	0.00119556	0.616984	0.032587	-0.373607	0.231584	0.726155	0.00749144	0.436571	0.155912	0.707531	0.0100545	-0.646583	0.0230795	0.506656	0.0927632	0.517097	0.0851417	0.712912	0.0092556	-0.461109	0.131354	0.0868231	0.788467
ENSMUSG00000046753	27481090	27508460	coiled-coil domain containing 66 [Source:MGI Symbol;Acc:MGI:2443639]	Ccdc66	protein_coding	-1	yellow	-0.0650028	0.84093	0.231028	0.470021	0.45307	0.139102	-0.440358	0.151945	-0.515347	0.0863886	0.593353	0.0419764	-0.767956	0.00353449	-0.0533333	0.869247	0.350832	0.263515	0.705837	0.0103163	-0.834176	0.000742199	0.726412	0.00745987	0.149683	0.642424	0.591305	0.0428713	-0.609923	0.0352163	0.50191	0.0963749	0.628545	0.0285909	0.704466	0.0105318	-0.391153	0.20864	-0.60392	0.0375681
ENSMUSG00000041133	152016428	152062694	structural maintenance of chromosomes 1A [Source:MGI Symbol;Acc:MGI:1344345]	Smc1a	protein_coding	1	yellow	-0.16291	0.612942	0.256004	0.421895	0.84284	0.00057634	-0.6633	0.0187023	-0.505738	0.0934545	0.780741	0.00272503	-0.709253	0.0097934	0.300267	0.342988	0.567175	0.0544549	0.705324	0.0103965	-0.366127	0.241804	0.858406	0.000351666	-0.0757925	0.814901	0.534148	0.073628	-0.65072	0.0219333	0.770443	0.00336434	0.427769	0.165385	0.691999	0.0126489	-0.713894	0.009115	-0.181865	0.5716
ENSMUSG00000039108	180024987	180035465	LSM family member 14B [Source:MGI Symbol;Acc:MGI:3040677]	Lsm14b	protein_coding	1	yellow	-0.124017	0.700974	0.122642	0.704157	0.310188	0.326477	-0.579431	0.0483278	-0.335015	0.287115	0.438266	0.154128	-0.692453	0.0125668	-0.0544785	0.866461	0.795241	0.00198705	0.549607	0.0641555	-0.503805	0.0949217	0.788458	0.00231016	0.196783	0.539878	0.579338	0.0483724	-0.511974	0.0888266	0.758764	0.00422066	0.445557	0.146604	0.793661	0.00205901	-0.512431	0.0884931	-0.207261	0.518051
ENSMUSG00000028809	135320484	135353321	serine/arginine repetitive matrix 1 [Source:MGI Symbol;Acc:MGI:1858303]	Srrm1	protein_coding	-1	yellow	-0.26695	0.401604	0.306805	0.332057	0.838994	0.00064598	-0.594441	0.0415062	-0.625622	0.0295658	0.844525	0.000547738	-0.713602	0.00915668	0.390636	0.209296	0.460592	0.131843	0.64013	0.0249534	-0.291715	0.357572	0.816684	0.00118777	-0.200956	0.531139	0.476968	0.116906	-0.569519	0.0532435	0.786099	0.00243148	0.293515	0.354476	0.617165	0.0325215	-0.73129	0.00688018	-0.126987	0.694116
ENSMUSG00000031358	168654117	168673898	MSL complex subunit 3 [Source:MGI Symbol;Acc:MGI:1341851]	Msl3	protein_coding	-1	yellow	0.00199744	0.995084	0.0443034	0.891257	0.611226	0.0347203	-0.585089	0.0456705	0.0223153	0.94512	0.412712	0.182419	-0.336533	0.284799	0.233794	0.46457	0.680641	0.014838	0.439488	0.15285	-0.0910218	0.778457	0.626922	0.0291292	0.0163684	0.959733	0.400224	0.197343	-0.488451	0.107126	0.649449	0.0222809	0.32256	0.306511	0.56227	0.0570524	-0.651604	0.0216938	0.013874	0.965866
ENSMUSG00000060475	12966796	12994169	Wilms tumour 1-associating protein [Source:MGI Symbol;Acc:MGI:1926395]	Wtap	protein_coding	-1	yellow	-0.255473	0.422893	-0.0677069	0.834392	0.656305	0.0204525	-0.846923	0.000508927	-0.526465	0.0786749	0.584376	0.0459992	-0.751581	0.00482352	0.125732	0.697011	0.73653	0.00629579	0.591544	0.0427661	-0.28252	0.373611	0.900593	6.45652e-05	0.0776763	0.810373	0.46322	0.129367	-0.542365	0.0684812	0.767853	0.00354163	0.464696	0.12799	0.637987	0.0255995	-0.603553	0.0377153	0.0867692	0.788596
ENSMUSG00000034738	69135800	69189330	nitric oxide synthase trafficker [Source:MGI Symbol;Acc:MGI:3606242]	Nostrin	protein_coding	1	yellow	-0.610145	0.0351316	0.0629968	0.845786	0.572573	0.0516929	-0.643275	0.0240268	-0.640029	0.0249836	0.577044	0.0494814	-0.611276	0.0347012	0.454326	0.137872	0.335138	0.286927	0.193018	0.547814	-0.254513	0.424699	0.576112	0.0499365	-0.386168	0.215012	0.0287389	0.929353	0.0450861	0.889346	0.756957	0.00436662	0.251605	0.430191	0.463492	0.129112	-0.331623	0.292325	-0.24719	0.438595
ENSMUSG00000041718	144317804	144374450	asparagine-linked glycosylation 13 [Source:MGI Symbol;Acc:MGI:1914824]	Alg13	protein_coding	1	yellow	-0.151329	0.638727	-0.286101	0.367322	0.440936	0.151344	-0.440221	0.152087	-0.354834	0.25773	0.518554	0.0841131	-0.567049	0.0545204	0.0043223	0.989363	0.534408	0.0734614	0.452406	0.139755	-0.284347	0.370396	0.570664	0.0526581	0.0517768	0.873035	-0.17124	0.594637	-0.089997	0.780897	0.526316	0.0787752	0.516817	0.0853406	0.415439	0.179256	-0.062777	0.846319	0.181767	0.571811
ENSMUSG00000093152	39075411	39075494	predicted gene, 25032 [Source:MGI Symbol;Acc:MGI:5454809]	Gm25032	miRNA	1	yellow	-0.55984	0.0583708	0.316524	0.316165	0.585647	0.0454139	-0.571085	0.0524445	-0.821022	0.00106196	0.762449	0.00393443	-0.854291	0.000402888	0.350281	0.264319	0.475917	0.11783	0.451462	0.140686	-0.413648	0.181329	0.821237	0.00105599	-0.269721	0.396547	0.420588	0.173379	-0.397367	0.20086	0.899015	6.96619e-05	0.180633	0.574254	0.621554	0.0309623	-0.702332	0.010874	-0.241345	0.449839
ENSMUSG00000041258	82593593	82692883	zinc finger protein 236 [Source:MGI Symbol;Acc:MGI:1926950]	Zfp236	protein_coding	-1	yellow	0.126474	0.695299	-0.0011285	0.997223	0.398995	0.198851	-0.507877	0.0918489	-0.389443	0.210812	0.623157	0.0304064	-0.813183	0.00129746	-0.296818	0.348831	0.526318	0.0787741	0.821976	0.0010357	-0.624949	0.0297937	0.831499	0.000800272	0.394644	0.204247	0.478404	0.115652	-0.795227	0.00198764	0.514787	0.0867899	0.567642	0.0542122	0.538661	0.0707694	-0.493958	0.102636	-0.0329475	0.919036
ENSMUSG00000036104	127868773	127943868	RAB3 GTPase activating protein subunit 1 [Source:MGI Symbol;Acc:MGI:2445001]	Rab3gap1	protein_coding	1	yellow	-0.0478917	0.882501	0.249186	0.434785	0.258918	0.416445	-0.287257	0.365302	-0.139025	0.666533	0.378012	0.225689	-0.302133	0.339849	0.151083	0.639281	0.274282	0.388294	0.270455	0.395212	-0.0298225	0.926696	0.430661	0.162234	-0.0370735	0.908931	0.495303	0.101558	-0.471716	0.121569	0.483447	0.111318	-0.0985127	0.760676	0.278312	0.381075	-0.705098	0.0104321	0.0561907	0.862299
ENSMUSG00000003437	28392951	28399388	Paf1, RNA polymerase II complex component [Source:MGI Symbol;Acc:MGI:1923988]	Paf1	protein_coding	1	yellow	-0.467333	0.125552	0.0841954	0.794746	0.346861	0.269332	-0.529407	0.0767152	-0.685608	0.0138489	0.442331	0.149903	-0.730205	0.00700601	0.11491	0.722134	0.56832	0.0538609	0.337231	0.283739	-0.386791	0.214209	0.689258	0.0131537	-0.0511449	0.874573	0.252055	0.429339	-0.189691	0.554865	0.677659	0.0154564	0.270372	0.395364	0.570098	0.0529471	-0.297462	0.347736	-0.146372	0.649881
ENSMUSG00000020070	62980223	63017210	RUN and FYVE domain-containing 2 [Source:MGI Symbol;Acc:MGI:1917682]	Rufy2	protein_coding	1	yellow	0.0134028	0.967024	-0.0982175	0.761375	0.200583	0.531918	-0.390238	0.209801	-0.115676	0.720347	0.0795679	0.805832	-0.511038	0.0895108	-0.258995	0.416302	0.507767	0.0919311	0.427879	0.165266	-0.748451	0.00510574	0.542366	0.0684803	0.36807	0.239124	0.280416	0.377334	-0.355904	0.256195	0.241701	0.449152	0.657636	0.0201105	0.556234	0.0603657	-0.0377983	0.907158	-0.53829	0.0710019
ENSMUSG00000031134	57383530	57393036	RNA binding motif protein, X chromosome [Source:MGI Symbol;Acc:MGI:1343044]	Rbmx	protein_coding	-1	yellow	-0.236341	0.459577	-0.351863	0.262018	0.439446	0.152894	-0.774628	0.00309213	-0.182067	0.571165	0.187789	0.558915	-0.451501	0.140647	-0.000701133	0.998275	0.613329	0.0339297	0.212264	0.507768	0.0776881	0.810345	0.600457	0.0389746	0.138406	0.667943	-0.117159	0.716892	-0.255429	0.422976	0.471968	0.121343	0.210166	0.512068	0.118979	0.712658	-0.330622	0.293874	0.42417	0.169362
ENSMUSG00000035851	86804221	86836659	YTH domain containing 1 [Source:MGI Symbol;Acc:MGI:2443713]	Ythdc1	protein_coding	1	yellow	0.137786	0.669355	-0.0862809	0.789762	0.251223	0.430915	-0.459092	0.13327	-0.370353	0.235998	0.471702	0.121581	-0.838373	0.000657802	-0.452408	0.139752	0.745336	0.00539875	0.821344	0.00105303	-0.670536	0.0170098	0.874898	0.000194899	0.549656	0.064127	0.53781	0.0713026	-0.818476	0.00113448	0.499865	0.0979598	0.614297	0.0335705	0.63229	0.0273758	-0.431421	0.161412	0.0381075	0.906401
ENSMUSG00000025262	151344175	151471842	family with sequence similarity 120, member C [Source:MGI Symbol;Acc:MGI:2387687]	Fam120c	protein_coding	1	yellow	0.136188	0.673	-0.145211	0.652503	0.419522	0.174585	-0.628777	0.0285145	0.141289	0.661388	0.242701	0.447218	-0.306944	0.331828	-0.0352463	0.913405	0.577216	0.0493973	0.431725	0.161083	-0.140117	0.66405	0.564728	0.0557404	0.237981	0.456375	0.42499	0.168451	-0.602655	0.0380776	0.448643	0.143491	0.403164	0.193764	0.390966	0.208877	-0.59844	0.0398109	0.0862595	0.789813
ENSMUSG00000041429	24632680	24638837	nth (endonuclease III)-like 1 (E.coli) [Source:MGI Symbol;Acc:MGI:1313275]	Nthl1	protein_coding	1	yellow	-0.0413308	0.898519	0.0939372	0.771525	0.449208	0.142926	-0.657877	0.0200491	-0.249716	0.433776	0.526435	0.0786952	-0.672734	0.0165188	0.0164475	0.959538	0.799008	0.0018232	0.640402	0.0248723	-0.531899	0.0750817	0.838242	0.000660321	0.183564	0.567951	0.679737	0.0150235	-0.593111	0.0420813	0.800022	0.00178094	0.558675	0.0590103	0.872606	0.000212557	-0.618556	0.0320214	-0.254877	0.424014
ENSMUSG00000022867	77013706	77116780	ubiquitin specific peptidase 25 [Source:MGI Symbol;Acc:MGI:1353655]	Usp25	protein_coding	1	yellow	-0.468897	0.124121	0.226243	0.479521	0.635242	0.0264447	-0.600878	0.0388015	-0.710581	0.00959568	0.76202	0.00396701	-0.765816	0.00368606	0.397917	0.200179	0.499378	0.0983394	0.477834	0.116149	-0.387531	0.213258	0.808975	0.00143939	-0.261002	0.412568	0.50481	0.094157	-0.369969	0.236522	0.88838	0.000112825	0.274496	0.387908	0.703338	0.0107117	-0.698699	0.0114755	-0.228863	0.474309
ENSMUSG00000021065	77238125	77476338	fucosyltransferase 8 [Source:MGI Symbol;Acc:MGI:1858901]	Fut8	protein_coding	1	yellow	-0.0461527	0.886743	-0.534583	0.0733495	0.324572	0.303328	-0.592072	0.0425346	-0.317365	0.314809	0.211255	0.509833	-0.53679	0.0719456	-0.240809	0.450879	0.580925	0.047616	0.457048	0.135231	-0.336267	0.285204	0.600811	0.0388289	0.359412	0.251202	0.0447686	0.890121	-0.201792	0.529395	0.26123	0.412145	0.663752	0.0185929	0.388599	0.21189	0.0701886	0.8284	0.222597	0.486818
ENSMUSG00000036501	34442351	34506831	family with sequence similarity 13, member B [Source:MGI Symbol;Acc:MGI:2447834]	Fam13b	protein_coding	-1	yellow	0.399468	0.19827	-0.207248	0.518078	0.100615	0.755704	-0.402205	0.194927	-0.09544	0.767957	0.287352	0.365137	-0.667904	0.0176118	-0.60488	0.0371848	0.774295	0.00311316	0.826701	0.000913036	-0.744585	0.00547124	0.764289	0.0037972	0.749555	0.00500482	0.59038	0.0432799	-0.70958	0.00974448	0.333184	0.289922	0.773462	0.00316621	0.728852	0.00716551	-0.169291	0.598899	-0.054413	0.86662
ENSMUSG00000026283	93803965	93822101	inhibitor of growth family, member 5 [Source:MGI Symbol;Acc:MGI:1922816]	Ing5	protein_coding	1	yellow	0.284395	0.370311	-0.260262	0.413944	0.440888	0.151395	-0.69325	0.0124234	-0.0446007	0.890531	0.39652	0.20191	-0.587488	0.044575	-0.279615	0.378756	0.786543	0.00240827	0.770253	0.00337705	-0.446118	0.146035	0.827442	0.000894871	0.523476	0.0807005	0.585966	0.0452679	-0.741206	0.00580653	0.490333	0.105577	0.706371	0.0102333	0.663716	0.0186017	-0.463487	0.129117	0.107385	0.739753
ENSMUSG00000022120	104477536	104522645	ring finger protein 219 [Source:MGI Symbol;Acc:MGI:1919736]	Rnf219	protein_coding	-1	yellow	-0.0994955	0.758351	0.122929	0.703492	0.490556	0.105394	-0.607329	0.0362194	-0.602021	0.0383346	0.66071	0.019337	-0.850067	0.000461325	-0.0612012	0.850137	0.509147	0.0909051	0.724761	0.00766415	-0.666381	0.0179672	0.839466	0.000637102	0.191068	0.551942	0.491467	0.104651	-0.523913	0.080402	0.628405	0.0286371	0.561742	0.0573369	0.707192	0.0101064	-0.350543	0.263936	-0.294164	0.353362
ENSMUSG00000031673	102632095	102785642	cadherin 11 [Source:MGI Symbol;Acc:MGI:99217]	Cdh11	protein_coding	-1	yellow	0.0653533	0.840082	0.0828255	0.798025	0.484803	0.110172	-0.614247	0.0335891	-0.271972	0.392463	0.302275	0.339611	-0.588009	0.0443396	-0.183032	0.569092	0.376074	0.228271	0.584264	0.0460512	-0.403931	0.192837	0.682867	0.0143886	0.348666	0.266679	0.439924	0.152395	-0.786593	0.0024057	0.266278	0.402836	0.373816	0.231302	0.283886	0.371205	-0.461135	0.13133	-0.141682	0.660495
ENSMUSG00000069094	19223108	19311322	phosphodiesterase 7A [Source:MGI Symbol;Acc:MGI:1202402]	Pde7a	protein_coding	-1	yellow	0.112685	0.727331	-0.133779	0.678509	0.243216	0.446226	-0.519104	0.0837267	-0.292013	0.357059	0.460436	0.131992	-0.797102	0.00190473	-0.40095	0.196456	0.849122	0.000475249	0.772147	0.00325134	-0.603654	0.0376748	0.869942	0.000234636	0.508899	0.0910888	0.507634	0.0920311	-0.733559	0.0066223	0.602602	0.0380988	0.630247	0.0280339	0.694739	0.0121589	-0.444179	0.148007	0.0812374	0.801829
ENSMUSG00000040446	24484960	24530204	regulation of nuclear pre-mRNA domain containing 1A [Source:MGI Symbol;Acc:MGI:2385066]	Rprd1a	protein_coding	-1	yellow	0.273696	0.38935	-0.26954	0.396876	0.316489	0.316221	-0.606796	0.0364279	-0.154884	0.63077	0.217605	0.496888	-0.635653	0.0263169	-0.476014	0.117744	0.716944	0.00868871	0.739612	0.00596992	-0.548707	0.0646822	0.785363	0.0024703	0.675628	0.0158882	0.477899	0.116092	-0.72862	0.0071931	0.257276	0.419512	0.693606	0.0123597	0.533824	0.0738362	-0.211677	0.508969	0.0494217	0.878771
ENSMUSG00000087150	128992952	129008040	cDNA sequence BC064078 [Source:MGI Symbol;Acc:MGI:3040692]	BC064078	transcribed_unprocessed_pseudogene	1	yellow	-0.0952904	0.768312	-0.284625	0.369907	0.126754	0.694652	-0.237745	0.456835	-0.528341	0.0774214	0.261476	0.411689	-0.543586	0.067738	-0.283902	0.371178	0.160594	0.618066	0.379799	0.223322	-0.424005	0.169545	0.393322	0.205904	0.25271	0.428099	-0.0596045	0.85401	-0.114438	0.723235	0.0664447	0.837443	0.434675	0.157922	0.167921	0.601904	0.217953	0.496185	0.0716725	0.824821
ENSMUSG00000032502	111561437	111690348	src homology three (SH3) and cysteine rich domain [Source:MGI Symbol;Acc:MGI:1201400]	Stac	protein_coding	-1	yellow	0.350244	0.264373	-0.398202	0.199828	0.270145	0.395776	-0.40257	0.194484	-0.0499884	0.877391	0.228999	0.474037	-0.498981	0.0986505	-0.451853	0.140299	0.466543	0.126279	0.680336	0.0149004	-0.571858	0.0520533	0.612443	0.0342611	0.609575	0.0353499	0.326182	0.300796	-0.575589	0.0501938	0.089799	0.781369	0.723484	0.00782506	0.406772	0.189427	-0.0866159	0.788962	0.0315156	0.922545
ENSMUSG00000040943	133463679	133545139	tet methylcytosine dioxygenase 2 [Source:MGI Symbol;Acc:MGI:2443298]	Tet2	protein_coding	-1	yellow	-0.368682	0.238283	0.0531642	0.869658	0.492794	0.103574	-0.484861	0.110123	-0.699374	0.0113619	0.72999	0.00703118	-0.879726	0.000161437	0.0712097	0.825937	0.422076	0.171703	0.544723	0.0670514	-0.531156	0.0755664	0.791432	0.00216391	-0.0463299	0.886311	0.165226	0.60783	-0.412948	0.182144	0.709636	0.00973613	0.3518	0.26211	0.466745	0.126093	-0.492246	0.104018	-0.102495	0.751266
ENSMUSG00000100213	46849529	46850479	predicted gene 28151 [Source:MGI Symbol;Acc:MGI:5578857]	Gm28151	lincRNA	-1	yellow	0.163111	0.612496	-0.284841	0.369528	0.551909	0.0628206	-0.74926	0.00503162	-0.0372919	0.908397	0.4178	0.176546	-0.406191	0.190121	-0.0163674	0.959735	0.584135	0.0461111	0.595038	0.0412498	-0.191009	0.552068	0.656617	0.0203719	0.252523	0.428452	0.462636	0.129915	-0.53883	0.0706639	0.478952	0.115176	0.616656	0.032706	0.523308	0.0808157	-0.461762	0.130737	0.166828	0.604306
ENSMUSG00000040040	57424062	57517936	intraflagellar transport 88 [Source:MGI Symbol;Acc:MGI:98715]	Ift88	protein_coding	1	yellow	-0.406997	0.189158	-0.218844	0.49438	0.509119	0.090926	-0.732622	0.00672785	-0.433882	0.158768	0.243435	0.445803	-0.526295	0.0787892	0.137463	0.670092	0.599632	0.039315	0.230077	0.471901	-0.0216187	0.946831	0.646134	0.0232066	0.00543765	0.986619	0.0902246	0.780355	-0.274164	0.388506	0.51448	0.0870106	0.233326	0.46549	0.271243	0.393783	-0.389309	0.210984	0.23957	0.453282
ENSMUSG00000066000	147611937	147642513	zinc finger protein 979 [Source:MGI Symbol;Acc:MGI:2148252]	Zfp979	protein_coding	-1	yellow	-0.648056	0.0226665	0.213009	0.506245	0.669477	0.0172502	-0.598975	0.0395877	-0.74453	0.0054765	0.646337	0.0231491	-0.674371	0.0161599	0.494967	0.101826	0.298977	0.345167	0.277637	0.382279	-0.27437	0.388135	0.648833	0.022451	-0.425346	0.168056	0.242903	0.44683	-0.253367	0.426858	0.7594	0.00417015	0.18968	0.554888	0.440843	0.15144	-0.623815	0.0301806	-0.271153	0.393945
ENSMUSG00000032745	111425680	111490111	GC-rich promoter binding protein 1 [Source:MGI Symbol;Acc:MGI:1920524]	Gpbp1	protein_coding	-1	yellow	-0.0841742	0.794797	0.00646174	0.984099	0.50844	0.0914298	-0.683812	0.0142008	-0.511124	0.0894479	0.605387	0.0369832	-0.869587	0.000237706	-0.103949	0.747837	0.79171	0.00215059	0.784446	0.00251935	-0.674281	0.0161794	0.954474	1.42661e-06	0.278617	0.380531	0.631324	0.0276856	-0.659745	0.0195774	0.730745	0.00694317	0.692009	0.0126472	0.862581	0.000305019	-0.495511	0.101392	-0.205315	0.522076
ENSMUSG00000096452	115861867	115862355	immunoglobulin heavy variable 1-77 [Source:MGI Symbol;Acc:MGI:4439670]	Ighv1-77	IG_V_gene	-1	yellow	0.0704039	0.82788	0.273241	0.39017	-0.097807	0.762347	-0.0562567	0.862138	-0.373643	0.231535	0.326607	0.300129	-0.630891	0.0278252	-0.412051	0.183191	0.398522	0.199433	0.547921	0.0651449	-0.622553	0.0306151	0.509135	0.0909141	0.361625	0.248081	0.52742	0.0780353	-0.62325	0.0303744	0.346348	0.270088	0.276325	0.384626	0.475195	0.118467	-0.31533	0.318095	-0.206778	0.519048
ENSMUSG00000057522	95414080	95493406	speckle-type BTB/POZ protein [Source:MGI Symbol;Acc:MGI:1343085]	Spop	protein_coding	1	yellow	-0.448829	0.143305	0.32705	0.299437	0.727023	0.00738532	-0.73238	0.00675535	-0.638488	0.0254473	0.715144	0.00893847	-0.627967	0.0287818	0.511	0.089539	0.405524	0.19092	0.41904	0.175133	-0.198073	0.53717	0.72157	0.0080708	-0.340574	0.278689	0.576866	0.0495681	-0.413172	0.181883	0.853208	0.000417299	0.209174	0.514109	0.622274	0.0307119	-0.767465	0.0035688	-0.236122	0.460005
ENSMUSG00000021302	14050659	14063488	geranylgeranyl diphosphate synthase 1 [Source:MGI Symbol;Acc:MGI:1341724]	Ggps1	protein_coding	-1	yellow	-0.400567	0.196923	-0.0418492	0.897252	0.509553	0.0906042	-0.695018	0.0121097	-0.53164	0.0752506	0.564048	0.0561011	-0.67441	0.0161513	0.260399	0.413688	0.728396	0.00721985	0.419601	0.174496	-0.33404	0.288607	0.764878	0.00375401	-0.112421	0.727948	0.379283	0.224005	-0.19477	0.544115	0.867287	0.000258377	0.457702	0.134602	0.779028	0.00282437	-0.448405	0.14373	-0.0951454	0.768656
ENSMUSG00000026648	3424131	3464130	DNA cross-link repair 1C [Source:MGI Symbol;Acc:MGI:2441769]	Dclre1c	protein_coding	1	yellow	-0.191306	0.551438	0.305253	0.334636	0.575442	0.0502658	-0.647257	0.0228898	-0.470523	0.122645	0.605566	0.0369125	-0.793034	0.00208813	0.0900574	0.780754	0.622107	0.0307698	0.6589	0.0197897	-0.610221	0.0351026	0.875527	0.000190253	0.0720926	0.823808	0.689419	0.0131238	-0.754661	0.00455761	0.766254	0.00365464	0.463427	0.129173	0.750487	0.00492078	-0.751476	0.00483285	-0.426631	0.166636
ENSMUSG00000036676	100443902	100487350	transmembrane and tetratricopeptide repeat containing 3 [Source:MGI Symbol;Acc:MGI:3036255]	Tmtc3	protein_coding	-1	yellow	-0.372548	0.233015	0.163388	0.611886	0.660002	0.0195131	-0.678549	0.0152699	-0.698266	0.0115488	0.760931	0.00405048	-0.790673	0.00220054	0.304031	0.336673	0.556615	0.0601527	0.556808	0.0600451	-0.320823	0.309272	0.870731	0.000227921	-0.134991	0.675735	0.525627	0.0792397	-0.468028	0.124915	0.853934	0.000407592	0.277852	0.381895	0.663845	0.0185705	-0.701919	0.0109412	-0.0533377	0.869236
ENSMUSG00000029167	51454250	51567726	peroxisome proliferative activated receptor, gamma, coactivator 1 alpha [Source:MGI Symbol;Acc:MGI:1342774]	Ppargc1a	protein_coding	-1	yellow	0.416087	0.178509	-0.266351	0.402701	0.0312752	0.923134	-0.307303	0.331233	-0.0798348	0.805192	0.198846	0.53555	-0.601731	0.0384529	-0.666083	0.0180374	0.695801	0.0119727	0.752395	0.00475217	-0.597059	0.0403906	0.693063	0.0124569	0.78738	0.00236502	0.494718	0.102026	-0.721826	0.00803765	0.193769	0.546226	0.615629	0.0330804	0.52071	0.0826062	-0.158315	0.623126	0.158377	0.622989
ENSMUSG00000030243	142350342	142387087	RecQ protein-like [Source:MGI Symbol;Acc:MGI:103021]	Recql	protein_coding	-1	yellow	-0.374177	0.230816	0.0785081	0.808375	0.417543	0.17684	-0.359753	0.250719	-0.572066	0.0519483	0.535659	0.0726624	-0.591561	0.0427587	0.158956	0.621702	0.129569	0.688169	0.248164	0.436734	-0.0650489	0.840818	0.535547	0.0727336	-0.147123	0.648186	-0.0282982	0.930434	-0.322614	0.306424	0.46025	0.132168	-0.12966	0.68796	-0.0125327	0.969164	-0.526599	0.0785852	0.22713	0.477752
ENSMUSG00000097743	56696280	56701268	predicted gene, 16973 [Source:MGI Symbol;Acc:MGI:4439897]	Gm16973	lincRNA	-1	yellow	0.148016	0.646175	-0.507387	0.0922153	0.287581	0.364737	-0.642793	0.0241672	-0.112823	0.727008	0.269685	0.396612	-0.650175	0.022082	-0.466544	0.126278	0.80371	0.00163349	0.633989	0.026837	-0.378449	0.225109	0.76546	0.00371171	0.584561	0.0459137	0.10035	0.756331	-0.567828	0.0541152	0.393094	0.206191	0.665219	0.0182418	0.38513	0.216353	-0.217335	0.497436	0.382104	0.220293
ENSMUSG00000033405	73518877	73548242	nudix (nucleoside diphosphate linked moiety X)-type motif 15 [Source:MGI Symbol;Acc:MGI:2443366]	Nudt15	protein_coding	-1	yellow	-0.0287315	0.929371	0.284382	0.370334	0.288245	0.363582	-0.189711	0.554823	-0.281125	0.376077	0.360876	0.249135	-0.491537	0.104594	-0.0887776	0.783803	0.0726073	0.822568	0.428488	0.164598	-0.443196	0.149013	0.451231	0.140914	0.105421	0.744372	0.378862	0.224561	-0.708101	0.00996755	0.229157	0.473724	0.148278	0.645584	0.146738	0.649056	-0.568384	0.0538278	-0.28658	0.366485
ENSMUSG00000021051	75450881	75596245	protein phosphatase 2, regulatory subunit B', epsilon [Source:MGI Symbol;Acc:MGI:1349473]	Ppp2r5e	protein_coding	-1	yellow	0.220472	0.491093	-0.130766	0.685417	0.276121	0.384991	-0.496944	0.100253	-0.317092	0.31525	0.456778	0.135492	-0.723384	0.00783772	-0.366936	0.240686	0.596187	0.04076	0.784281	0.00252823	-0.745932	0.00534171	0.758941	0.00420654	0.51505	0.0866011	0.47436	0.119207	-0.489733	0.106069	0.405872	0.190503	0.754624	0.00456071	0.735792	0.00637573	-0.0704726	0.827715	-0.200463	0.532169
ENSMUSG00000040195	127666901	127701049	nuclear envelope integral membrane protein 1 [Source:MGI Symbol;Acc:MGI:2446113]	Nemp1	protein_coding	1	yellow	0.120047	0.710176	-0.0530089	0.870036	0.586305	0.045113	-0.582534	0.0468575	-0.237197	0.457904	0.660357	0.0194247	-0.510358	0.0900102	0.102347	0.751615	0.565624	0.0552673	0.67506	0.0160106	-0.32805	0.297872	0.66607	0.0180405	0.110619	0.732167	0.367441	0.239989	-0.306363	0.332791	0.623146	0.0304103	0.604518	0.0373291	0.729844	0.00704839	-0.257608	0.418892	-0.0179825	0.955765
ENSMUSG00000020863	94287890	94321988	LUC7-like 3 (S. cerevisiae) [Source:MGI Symbol;Acc:MGI:1914934]	Luc7l3	protein_coding	-1	yellow	-0.276938	0.383528	0.000421952	0.998962	0.725243	0.00760406	-0.878945	0.000166517	-0.496358	0.100718	0.625112	0.0297384	-0.781642	0.00267387	0.178256	0.579385	0.726962	0.00739273	0.601016	0.0387451	-0.357722	0.2536	0.932524	9.82945e-06	0.0350396	0.913911	0.44433	0.147853	-0.567209	0.0544369	0.82227	0.00102772	0.481391	0.113073	0.662565	0.0188808	-0.662539	0.018887	-0.0591294	0.855162
ENSMUSG00000015224	96568429	96591578	cytochrome P450, family 2, subfamily j, polypeptide 9 [Source:MGI Symbol;Acc:MGI:1921769]	Cyp2j9	protein_coding	-1	yellow	0.0119685	0.970552	0.194748	0.54416	0.367505	0.239902	-0.446233	0.145919	-0.31979	0.31092	0.245644	0.441555	-0.590525	0.0432157	-0.17151	0.594046	0.312374	0.322899	0.5285	0.0773159	-0.642593	0.0242258	0.610378	0.0350427	0.306513	0.332542	0.462714	0.129841	-0.618517	0.0320353	0.226242	0.479522	0.428175	0.164941	0.42347	0.170142	-0.273791	0.389177	-0.505194	0.0938665
ENSMUSG00000100131	24611535	24612410	predicted gene 28439 [Source:MGI Symbol;Acc:MGI:5579145]	Gm28439	unprocessed_pseudogene	-1	yellow	-0.274464	0.387966	0.165206	0.607875	0.600224	0.0390705	-0.656174	0.0204863	-0.663405	0.0186768	0.765411	0.00371527	-0.935095	8.12966e-06	0.0817133	0.800688	0.663146	0.0187394	0.712712	0.00928446	-0.587564	0.0445408	0.967388	2.75029e-07	0.0517378	0.87313	0.539202	0.0704321	-0.650957	0.0218689	0.854878	0.000395259	0.465243	0.127482	0.743247	0.00560219	-0.689647	0.0130812	-0.189028	0.556275
ENSMUSG00000036368	79611863	79693192	regulator of microtubule dynamics 2 [Source:MGI Symbol;Acc:MGI:2147043]	Rmdn2	protein_coding	1	yellow	-0.455965	0.136278	-0.0447894	0.89007	0.509894	0.0903522	-0.751796	0.00480465	-0.332732	0.290616	0.358017	0.25318	-0.502571	0.0958662	0.254934	0.423905	0.578018	0.0490084	0.159178	0.621209	0.0981441	0.761549	0.613329	0.0339297	-0.15475	0.63107	0.0191992	0.952775	-0.291474	0.357988	0.718627	0.00846005	0.0552037	0.864698	0.212203	0.507893	-0.619704	0.0316129	0.251521	0.430349
ENSMUSG00000112346	99105791	99108080	predicted gene, 48768 [Source:MGI Symbol;Acc:MGI:6098457]	Gm48768	bidirectional_promoter_lncRNA	-1	yellow	0.12518	0.698286	-0.159759	0.619918	0.609569	0.035352	-0.665575	0.0181574	-0.0834028	0.796643	0.331225	0.292942	-0.518745	0.0839786	-0.0900149	0.780855	0.721436	0.00808831	0.648542	0.0225315	-0.448435	0.1437	0.729592	0.007078	0.335121	0.286952	0.319939	0.310683	-0.546958	0.0657153	0.428699	0.164368	0.72333	0.00784465	0.621757	0.0308915	-0.269135	0.397614	-0.142086	0.659579
ENSMUSG00000030770	112427505	112591692	parvin, alpha [Source:MGI Symbol;Acc:MGI:1931144]	Parva	protein_coding	1	yellow	0.289564	0.361292	-0.245463	0.441902	0.170144	0.597033	-0.451111	0.141033	-0.172873	0.591073	0.255137	0.423523	-0.658792	0.019817	-0.556324	0.0603158	0.734586	0.00650801	0.736182	0.00633341	-0.505265	0.0938122	0.767758	0.00354829	0.69688	0.0117858	0.459106	0.133257	-0.750602	0.00491052	0.290461	0.359738	0.565171	0.055506	0.488851	0.106796	-0.268325	0.39909	0.21801	0.496068
ENSMUSG00000038658	29522282	29606829	RAB6A GEF complex partner 1 [Source:MGI Symbol;Acc:MGI:1924893]	Ric1	protein_coding	1	yellow	-0.256502	0.420962	0.160937	0.617306	0.551305	0.0631693	-0.690471	0.0129287	-0.605924	0.0367709	0.706867	0.0101565	-0.894725	8.5136e-05	0.0589932	0.855493	0.71628	0.00878024	0.692842	0.0124966	-0.594653	0.041415	0.928936	1.26579e-05	0.0688192	0.831705	0.551809	0.0628784	-0.605367	0.0369913	0.868585	0.00024655	0.535258	0.072918	0.804798	0.00159182	-0.620999	0.0311565	-0.241874	0.448817
ENSMUSG00000064345	3914	4951	mitochondrially encoded NADH dehydrogenase 2 [Source:MGI Symbol;Acc:MGI:102500]	mt-Nd2	protein_coding	1	yellow	-0.367114	0.24044	0.181858	0.571616	0.63636	0.026098	-0.676008	0.0158067	-0.708445	0.00991523	0.798134	0.00186027	-0.907612	4.53167e-05	0.182923	0.569327	0.598135	0.0399383	0.627295	0.0290048	-0.436978	0.155482	0.93167	1.04518e-05	-0.0647446	0.841555	0.444647	0.14753	-0.588007	0.0443408	0.888107	0.000114155	0.327362	0.298948	0.631826	0.0275243	-0.741524	0.00577433	-0.0774999	0.810797
ENSMUSG00000025026	53140443	53247399	adducin 3 (gamma) [Source:MGI Symbol;Acc:MGI:1351615]	Add3	protein_coding	1	yellow	0.176876	0.582373	-0.0860622	0.790284	0.195831	0.541878	-0.453269	0.138906	-0.213935	0.504353	0.33654	0.284788	-0.717313	0.0086382	-0.457232	0.135054	0.787015	0.00238379	0.73403	0.00656974	-0.569524	0.0532405	0.806356	0.00153358	0.570715	0.0526323	0.545895	0.0663485	-0.816879	0.00118189	0.46331	0.129283	0.553132	0.0621198	0.593097	0.0420874	-0.453133	0.13904	0.0644284	0.84232
ENSMUSG00000022629	90933276	91049948	kinesin family member 21A [Source:MGI Symbol;Acc:MGI:109188]	Kif21a	protein_coding	-1	yellow	0.338176	0.282305	-0.209579	0.513275	0.40907	0.186696	-0.606394	0.0365857	-0.12702	0.694039	0.3821	0.220298	-0.632146	0.0274219	-0.367476	0.239942	0.701201	0.0110586	0.831494	0.00080037	-0.565177	0.0555029	0.829638	0.000842644	0.607172	0.0362804	0.634158	0.0267837	-0.78597	0.00243827	0.363899	0.244898	0.720097	0.00826386	0.653249	0.0212533	-0.364717	0.24376	0.0157545	0.961242
ENSMUSG00000028383	59581563	59618689	hydroxysteroid dehydrogenase like 2 [Source:MGI Symbol;Acc:MGI:1919729]	Hsdl2	protein_coding	1	yellow	-0.355852	0.256269	0.207345	0.517878	0.742782	0.00564825	-0.582237	0.0469968	-0.619462	0.0316986	0.777518	0.00291416	-0.676552	0.0156907	0.392709	0.206674	0.4997	0.0980884	0.532847	0.0744667	-0.271116	0.394014	0.738173	0.0061204	-0.253008	0.427536	0.331748	0.292133	-0.373914	0.23117	0.811468	0.00135395	0.34115	0.277824	0.62803	0.0287609	-0.586426	0.0450575	-0.112159	0.728561
ENSMUSG00000023892	21450374	21465587	zinc finger protein 51 [Source:MGI Symbol;Acc:MGI:99198]	Zfp51	protein_coding	1	yellow	-0.13289	0.680545	0.0383891	0.905712	0.525634	0.0792345	-0.638947	0.0253086	-0.610053	0.0351667	0.750148	0.00495121	-0.879396	0.00016357	-0.0047729	0.988255	0.693284	0.0124173	0.764466	0.00378416	-0.566151	0.0549904	0.934733	8.35352e-06	0.158202	0.623378	0.574855	0.0505556	-0.567119	0.0544842	0.796479	0.00193202	0.558537	0.0590861	0.810062	0.00140163	-0.528172	0.0775338	-0.0721838	0.823589
ENSMUSG00000027882	108793176	108840526	syntaxin binding protein 3 [Source:MGI Symbol;Acc:MGI:107362]	Stxbp3	protein_coding	-1	yellow	-0.494885	0.101892	0.268462	0.39884	0.68778	0.013432	-0.65704	0.0202631	-0.602148	0.038283	0.670303	0.0170624	-0.66857	0.0174581	0.425846	0.167503	0.316862	0.315619	0.325009	0.302641	-0.159504	0.620484	0.70686	0.0101575	-0.310987	0.325167	0.239139	0.45412	-0.399567	0.198148	0.771736	0.00327834	0.0274307	0.932563	0.327901	0.298106	-0.757779	0.00429972	-0.110077	0.733437
ENSMUSG00000024240	6435951	6516108	enhancer of polycomb homolog 1 [Source:MGI Symbol;Acc:MGI:1278322]	Epc1	protein_coding	-1	yellow	0.415245	0.17948	-0.432145	0.160632	0.239507	0.453404	-0.474611	0.118984	0.0394971	0.903002	0.157039	0.625966	-0.520569	0.0827042	-0.583355	0.0464735	0.5672	0.054442	0.720228	0.00824658	-0.603709	0.0376526	0.638279	0.0255109	0.732192	0.0067768	0.28849	0.363157	-0.669438	0.017259	0.0793408	0.806377	0.807538	0.00149052	0.395858	0.202732	-0.0666905	0.836848	0.0432607	0.893803
ENSMUSG00000056579	3639785	3649673	taurine upregulated gene 1 [Source:MGI Symbol;Acc:MGI:2144114]	Tug1	protein_coding	-1	yellow	-0.134628	0.676567	0.0349821	0.914051	0.439388	0.152954	-0.623039	0.0304473	-0.520664	0.0826385	0.598332	0.0398561	-0.90296	5.74706e-05	-0.125879	0.696671	0.799948	0.00178399	0.744363	0.00549281	-0.740349	0.00589398	0.938873	6.06245e-06	0.259555	0.415258	0.539456	0.0702741	-0.593477	0.0419227	0.763179	0.00387954	0.673037	0.0164519	0.865117	0.000279142	-0.450091	0.142046	-0.273794	0.389173
ENSMUSG00000084260	117728718	117729299	predicted gene 12844 [Source:MGI Symbol;Acc:MGI:3651053]	Gm12844	processed_pseudogene	-1	yellow	-0.419305	0.174831	0.290956	0.358882	0.67195	0.0166927	-0.647516	0.0228173	-0.773859	0.00314085	0.795035	0.00199632	-0.81939	0.00110803	0.316488	0.316223	0.338297	0.282122	0.52116	0.0822943	-0.389987	0.21012	0.795892	0.00195793	-0.205195	0.522324	0.374216	0.230763	-0.420479	0.173502	0.781091	0.00270507	0.227107	0.477798	0.527691	0.0778543	-0.606925	0.0363771	-0.226805	0.478401
ENSMUSG00000022159	52261759	52279545	RAB2B, member RAS oncogene family [Source:MGI Symbol;Acc:MGI:1923588]	Rab2b	protein_coding	-1	yellow	-0.334762	0.287501	0.195056	0.543512	0.349981	0.264756	-0.369298	0.23744	-0.603102	0.0378968	0.596601	0.0405844	-0.714109	0.00908455	0.146765	0.648995	0.589698	0.0435828	0.502461	0.0959507	-0.51642	0.0856223	0.717015	0.00867907	-0.0791622	0.806805	0.608202	0.0358794	-0.43753	0.1549	0.770922	0.0033323	0.376341	0.227914	0.776399	0.00298209	-0.595867	0.0408961	-0.249362	0.434449
ENSMUSG00000094870	119765187	119790889	zinc finger protein 131 [Source:MGI Symbol;Acc:MGI:1919715]	Zfp131	protein_coding	-1	yellow	0.257551	0.418997	-0.379026	0.224343	0.317362	0.314814	-0.611296	0.0346935	0.0666618	0.836918	0.106711	0.741339	-0.399133	0.198681	-0.27008	0.395894	0.752215	0.00476791	0.584014	0.046167	-0.53963	0.070166	0.633936	0.0268537	0.521581	0.0820028	0.498465	0.0990544	-0.414436	0.180415	0.292281	0.356598	0.857928	0.000357337	0.735408	0.0064176	-0.0740309	0.819139	-0.171605	0.59384
ENSMUSG00000027187	103453849	103485160	catalase [Source:MGI Symbol;Acc:MGI:88271]	Cat	protein_coding	-1	yellow	0.49877	0.0988155	-0.287942	0.36411	0.037743	0.907293	-0.351828	0.262069	0.0523842	0.871556	0.1234	0.702402	-0.549391	0.0642816	-0.689634	0.0130836	0.732845	0.00670265	0.775021	0.00306747	-0.727064	0.00738032	0.670166	0.0170935	0.843297	0.000568474	0.541177	0.0692094	-0.693382	0.0123997	0.160406	0.618484	0.797783	0.00187531	0.641448	0.0245619	-0.0547656	0.865763	-0.0601343	0.852724
ENSMUSG00000039542	49502136	49798925	neural cell adhesion molecule 1 [Source:MGI Symbol;Acc:MGI:97281]	Ncam1	protein_coding	-1	yellow	0.317277	0.314951	-0.165099	0.608109	0.127909	0.691991	-0.342438	0.275896	-0.272651	0.391234	0.337066	0.283988	-0.73428	0.00654186	-0.597476	0.040215	0.68334	0.0142944	0.839325	0.000639731	-0.726353	0.00746715	0.775856	0.0030155	0.707316	0.0100873	0.576162	0.0499123	-0.769347	0.00343852	0.283897	0.371186	0.693436	0.0123902	0.630958	0.0278036	-0.20481	0.523122	0.0118592	0.970821
ENSMUSG00000112808	26107789	26108421	predicted gene 4739 [Source:MGI Symbol;Acc:MGI:3642984]	Gm4739	processed_pseudogene	1	yellow	-0.0995754	0.758162	-0.21229	0.507714	0.703406	0.0107008	-0.54121	0.0691891	-0.222508	0.486996	0.375297	0.229311	-0.243442	0.445789	0.292852	0.355615	0.118884	0.712878	0.272541	0.391433	0.0298482	0.926633	0.378558	0.224963	-0.104407	0.74676	-0.122082	0.705454	-0.0710717	0.82627	0.207199	0.518178	0.286051	0.367408	0.0982046	0.761405	-0.103921	0.747904	0.115088	0.721719
ENSMUSG00000032212	70542754	70592234	SAFB-like, transcription modulator [Source:MGI Symbol;Acc:MGI:1913910]	Sltm	protein_coding	1	yellow	-0.291944	0.357178	0.0852592	0.792203	0.777792	0.00289771	-0.72702	0.00738576	-0.373691	0.231471	0.556548	0.0601902	-0.497136	0.100102	0.413586	0.181402	0.534714	0.0732657	0.380946	0.221812	-0.0579042	0.858137	0.677976	0.0153897	-0.187751	0.558996	0.197825	0.537689	-0.276602	0.384129	0.70465	0.0105027	0.24631	0.440278	0.482525	0.112103	-0.509248	0.0908299	-0.00801867	0.980268
ENSMUSG00000037669	8208107	8285759	lipid droplet associated hydrolase [Source:MGI Symbol;Acc:MGI:1916082]	Ldah	protein_coding	1	yellow	-0.25719	0.419673	0.161662	0.615701	0.69354	0.0123715	-0.482728	0.11193	-0.559414	0.058604	0.686457	0.0136849	-0.695373	0.0120475	0.194323	0.545057	0.444756	0.147418	0.556502	0.0602158	-0.206014	0.520628	0.758132	0.00427124	-0.076698	0.812724	0.250549	0.432193	-0.628002	0.0287703	0.625022	0.0297688	0.179609	0.576461	0.337876	0.282761	-0.702807	0.0107972	0.121114	0.707699
ENSMUSG00000100280	34468834	34473148	predicted gene 28417 [Source:MGI Symbol;Acc:MGI:5579123]	Gm28417	processed_transcript	-1	yellow	-0.0357863	0.912082	0.0941025	0.771132	0.395169	0.203591	-0.444623	0.147554	-0.535862	0.0725334	0.535428	0.0728095	-0.871157	0.000224361	-0.268642	0.398513	0.450408	0.14173	0.75403	0.00461113	-0.83069	0.00081849	0.80004	0.00178018	0.330543	0.293997	0.423146	0.170504	-0.70982	0.00970859	0.435396	0.157155	0.626254	0.0293531	0.56621	0.0549592	-0.341775	0.276887	-0.374902	0.229841
ENSMUSG00000028082	85971109	86130526	SH3 domain protein D19 [Source:MGI Symbol;Acc:MGI:1350923]	Sh3d19	protein_coding	1	yellow	-0.217425	0.497254	0.338276	0.282155	0.594034	0.0416816	-0.45994	0.132463	-0.560063	0.0582488	0.810793	0.00137669	-0.781861	0.00266155	0.215546	0.501069	0.62272	0.0305574	0.672956	0.0164697	-0.518105	0.084429	0.822023	0.00103443	-0.0903478	0.780062	0.507598	0.0920574	-0.525766	0.0791454	0.881127	0.000152622	0.400463	0.197051	0.812563	0.00131767	-0.63917	0.0252415	-0.274141	0.388548
ENSMUSG00000039634	49521176	49531517	zinc finger protein 189 [Source:MGI Symbol;Acc:MGI:2444707]	Zfp189	protein_coding	1	yellow	0.0976662	0.76268	-0.0807715	0.802945	0.238851	0.45468	-0.318779	0.312539	-0.300677	0.342297	0.418115	0.176186	-0.72386	0.00777741	-0.319776	0.310942	0.641889	0.024432	0.715182	0.00893323	-0.765847	0.0036838	0.765757	0.00369025	0.42735	0.165846	0.53395	0.0737556	-0.637549	0.0257329	0.444425	0.147756	0.646377	0.0231376	0.700056	0.0112481	-0.347685	0.268119	-0.213424	0.505395
ENSMUSG00000034158	37868389	37888858	leucine rich repeat containing 58 [Source:MGI Symbol;Acc:MGI:2443542]	Lrrc58	protein_coding	1	yellow	0.20812	0.516279	-0.0475846	0.88325	0.458384	0.133948	-0.632463	0.0273206	-0.277155	0.383141	0.555637	0.0607006	-0.741432	0.00578364	-0.257162	0.419726	0.728578	0.00719818	0.858396	0.00035178	-0.546305	0.0661037	0.901193	6.27035e-05	0.464875	0.127823	0.6938	0.0123252	-0.84003	0.000626613	0.568903	0.0535598	0.630926	0.027814	0.713634	0.00915214	-0.555128	0.0609876	0.0169671	0.958261
ENSMUSG00000045078	142990893	143112994	ring finger protein 216 [Source:MGI Symbol;Acc:MGI:1344349]	Rnf216	protein_coding	-1	yellow	-0.0695044	0.830051	0.181211	0.573007	0.507903	0.09183	-0.626578	0.0292444	-0.437757	0.154663	0.651404	0.0217479	-0.839963	0.000627847	-0.0804252	0.803776	0.609982	0.0351938	0.750024	0.00496241	-0.674789	0.0160691	0.869211	0.000240996	0.19712	0.53917	0.548738	0.0646644	-0.741938	0.00573263	0.718924	0.00842015	0.581495	0.0473463	0.707767	0.0100185	-0.605663	0.0368741	-0.32256	0.30651
ENSMUSG00000091243	65815257	65866368	vestigial like family member 3 [Source:MGI Symbol;Acc:MGI:1920819]	Vgll3	protein_coding	1	yellow	-0.175829	0.584644	-0.0305064	0.925019	0.302533	0.339179	-0.420868	0.173062	-0.500894	0.09716	0.554932	0.0610979	-0.646568	0.0230838	-0.0688229	0.831696	0.48222	0.112363	0.479817	0.114427	-0.111893	0.729183	0.650174	0.0220823	0.0903924	0.779956	0.269916	0.396192	-0.538632	0.0707878	0.583604	0.0463576	0.143088	0.657306	0.277984	0.38166	-0.586441	0.0450507	0.424762	0.168704
ENSMUSG00000002010	73778963	73786897	isocitrate dehydrogenase 3 (NAD+), gamma [Source:MGI Symbol;Acc:MGI:1099463]	Idh3g	protein_coding	-1	yellow	-0.415694	0.178962	-0.199283	0.534634	0.577874	0.049078	-0.770165	0.00338301	-0.522608	0.0812953	0.565291	0.0554426	-0.670523	0.0170126	0.208828	0.51482	0.634052	0.0268172	0.352088	0.261692	-0.0275813	0.932193	0.760329	0.00409728	-0.0869219	0.788231	0.0379934	0.90668	-0.242496	0.447614	0.775919	0.0030116	0.226621	0.478767	0.363618	0.24529	-0.507221	0.0923396	0.369422	0.23727
ENSMUSG00000040785	94370618	94469343	tetratricopeptide repeat domain 3 [Source:MGI Symbol;Acc:MGI:1276539]	Ttc3	protein_coding	1	yellow	0.142622	0.658362	-0.10806	0.738168	0.387618	0.213146	-0.585358	0.0455465	-0.350926	0.263379	0.51727	0.0850195	-0.852436	0.000427797	-0.386532	0.214542	0.768714	0.00348195	0.866829	0.000262659	-0.692402	0.012576	0.927773	1.37004e-05	0.529053	0.0769492	0.543215	0.0679632	-0.831533	0.000799496	0.540681	0.0695151	0.710939	0.00954282	0.684482	0.0140687	-0.447719	0.144419	-0.0275745	0.93221
ENSMUSG00000037890	65199696	65260415	WD repeat domain 19 [Source:MGI Symbol;Acc:MGI:2443231]	Wdr19	protein_coding	1	yellow	0.376025	0.228337	-0.219538	0.492978	0.217862	0.496369	-0.5024	0.0959976	0.0316643	0.92218	0.0933113	0.773012	-0.49923	0.0984557	-0.554818	0.0611624	0.56761	0.0542284	0.649249	0.022336	-0.466087	0.1267	0.634356	0.0267215	0.71374	0.00913704	0.368732	0.238215	-0.776319	0.00298701	0.100786	0.755302	0.565037	0.0555766	0.309381	0.327804	-0.210472	0.51144	0.0618534	0.848557
ENSMUSG00000032776	72077830	72306608	multiple C2 domains, transmembrane 2 [Source:MGI Symbol;Acc:MGI:2685335]	Mctp2	protein_coding	-1	yellow	0.27031	0.395475	-0.148034	0.646135	0.254442	0.424831	-0.430261	0.162667	-0.36306	0.24607	0.501257	0.0968788	-0.809037	0.00143722	-0.499635	0.0981392	0.588337	0.0441922	0.878525	0.000169307	-0.773398	0.00317032	0.811758	0.00134425	0.609973	0.0351973	0.466019	0.126763	-0.675412	0.0159347	0.359261	0.251416	0.735725	0.00638298	0.638356	0.0254876	-0.158417	0.622899	-0.0629579	0.845881
ENSMUSG00000060657	14109173	14163351	meiosis regulator and mRNA stability 1 [Source:MGI Symbol;Acc:MGI:2444505]	Marf1	protein_coding	-1	yellow	-0.175842	0.584615	0.0962845	0.765954	0.543958	0.067513	-0.58494	0.0457387	-0.579674	0.0482115	0.799284	0.00181161	-0.835905	0.000706483	0.093813	0.77182	0.561196	0.0576324	0.710796	0.0095639	-0.615449	0.0331463	0.850192	0.000459504	0.0240721	0.940806	0.502133	0.0962033	-0.482327	0.112272	0.811948	0.00133796	0.571642	0.0521622	0.79308	0.00208598	-0.524324	0.0801221	-0.237273	0.457755
ENSMUSG00000036461	79481194	79582494	E74-like factor 1 [Source:MGI Symbol;Acc:MGI:107180]	Elf1	protein_coding	1	yellow	0.0124333	0.969409	0.0798328	0.805196	0.325971	0.301127	-0.497844	0.0995432	-0.505142	0.0939055	0.632141	0.0274235	-0.888212	0.000113643	-0.258111	0.417951	0.715643	0.00886877	0.815806	0.0012146	-0.715652	0.00886755	0.891009	0.000100608	0.354263	0.258551	0.597128	0.0403614	-0.694534	0.0121949	0.681198	0.0147246	0.608878	0.0356181	0.791937	0.00213977	-0.455238	0.136984	-0.148601	0.644857
ENSMUSG00000043881	79426511	79431036	kelch repeat and BTB (POZ) domain containing 7 [Source:MGI Symbol;Acc:MGI:2685141]	Kbtbd7	protein_coding	1	yellow	-0.114255	0.723662	0.381878	0.220588	0.641122	0.0246585	-0.483602	0.111187	-0.402579	0.194473	0.692791	0.0125058	-0.652603	0.0214256	0.147505	0.647326	0.431852	0.160947	0.629274	0.0283515	-0.31191	0.323657	0.716459	0.00875557	-0.0405166	0.900509	0.44762	0.144518	-0.796574	0.00192784	0.669176	0.0173189	0.243584	0.445515	0.441852	0.150397	-0.810722	0.00137908	-0.125948	0.696513
ENSMUSG00000029655	150608007	150666183	NEDD4 binding protein 2-like 2 [Source:MGI Symbol;Acc:MGI:2687207]	N4bp2l2	protein_coding	-1	yellow	-0.166538	0.604943	0.104884	0.745636	0.563641	0.0563181	-0.453709	0.138475	-0.441999	0.150245	0.648906	0.0224308	-0.495058	0.101753	0.313514	0.321042	0.165521	0.607181	0.464861	0.127836	-0.423019	0.170646	0.532393	0.0747611	-0.179641	0.576393	0.427756	0.1654	-0.239516	0.453388	0.532639	0.0746012	0.430282	0.162644	0.570977	0.0524994	-0.383747	0.218149	-0.356335	0.255578
ENSMUSG00000022770	31663443	31875129	discs large MAGUK scaffold protein 1 [Source:MGI Symbol;Acc:MGI:107231]	Dlg1	protein_coding	1	yellow	0.348836	0.266429	-0.332333	0.291231	0.375095	0.229582	-0.548995	0.0645133	0.0544061	0.866637	0.244719	0.443331	-0.379648	0.223521	-0.226569	0.478871	0.549883	0.0639945	0.652023	0.0215812	-0.563202	0.0565525	0.591815	0.0426472	0.475856	0.117884	0.516475	0.0855838	-0.425407	0.167988	0.23811	0.456123	0.852594	0.000425629	0.687977	0.0133947	-0.0792065	0.806699	-0.20586	0.520946
ENSMUSG00000084407	121485432	121491512	predicted gene 14018 [Source:MGI Symbol;Acc:MGI:3649456]	Gm14018	unprocessed_pseudogene	1	yellow	-0.0904157	0.7799	0.0966199	0.765159	0.389231	0.211082	-0.532394	0.07476	-0.521646	0.0819581	0.50281	0.0956833	-0.878376	0.000170304	-0.242317	0.447961	0.684717	0.0140226	0.719266	0.00837429	-0.622758	0.0305444	0.896698	7.77169e-05	0.345354	0.271558	0.515288	0.0864306	-0.795432	0.00197848	0.584384	0.0459957	0.46769	0.125225	0.592797	0.0422177	-0.546685	0.0658772	-0.109838	0.733997
ENSMUSG00000067869	90882615	90883518	transcription elongation factor A (SII) 1, pseudogene 1 [Source:MGI Symbol;Acc:MGI:1861432]	Tcea1-ps1	processed_pseudogene	1	yellow	-0.0486711	0.880601	0.0795094	0.805972	0.77449	0.00310079	-0.763128	0.00388335	-0.0963284	0.76585	0.50576	0.0934385	-0.448532	0.143603	0.2926	0.356048	0.67733	0.0155257	0.545346	0.0666771	-0.270413	0.395289	0.71583	0.00884268	-0.0161518	0.960265	0.456979	0.135298	-0.502699	0.095768	0.708558	0.00989819	0.546038	0.066263	0.708133	0.00996257	-0.595728	0.0409553	-0.240635	0.451216
ENSMUSG00000100078	128520073	128521460	predicted gene 6170 [Source:MGI Symbol;Acc:MGI:3643368]	Gm6170	processed_pseudogene	-1	yellow	-0.473787	0.119716	0.138835	0.666965	0.640777	0.0247609	-0.683454	0.0142717	-0.744057	0.00552262	0.763838	0.00383049	-0.817063	0.00117637	0.276069	0.385085	0.495522	0.101383	0.476343	0.117455	-0.188872	0.556608	0.826463	0.000918942	-0.18957	0.555124	0.27265	0.391236	-0.466727	0.12611	0.850556	0.000454244	0.1541	0.632523	0.428226	0.164885	-0.727151	0.00736982	0.130895	0.685122
ENSMUSG00000038729	57717657	57896984	paralemmin A kinase anchor protein [Source:MGI Symbol;Acc:MGI:5141924]	Pakap	protein_coding	1	yellow	0.372827	0.232638	-0.234879	0.46244	-0.0908361	0.778899	-0.191726	0.550547	-0.058645	0.856338	0.142769	0.65803	-0.605167	0.0370708	-0.719646	0.00832365	0.715472	0.00889262	0.700579	0.0111613	-0.681847	0.0145933	0.640063	0.0249734	0.778226	0.00287181	0.437421	0.155015	-0.687616	0.0134632	0.199228	0.53475	0.62321	0.0303884	0.531651	0.0752431	-0.123538	0.702083	0.0660101	0.838493
ENSMUSG00000032607	108296853	108302302	aminomethyltransferase [Source:MGI Symbol;Acc:MGI:3646700]	Amt	protein_coding	1	yellow	0.403814	0.192978	-0.289267	0.361806	0.174991	0.586462	-0.457971	0.134344	-0.095529	0.767746	0.242805	0.447018	-0.593346	0.0419793	-0.555115	0.0609947	0.763069	0.00388778	0.803797	0.0016301	-0.596508	0.0406235	0.745653	0.00536836	0.740173	0.00591207	0.610183	0.0351169	-0.713779	0.00913141	0.263025	0.408822	0.754974	0.00453115	0.667308	0.0177502	-0.17356	0.589576	0.0899812	0.780935
ENSMUSG00000033149	45746243	45953598	pleckstrin homology like domain, family B, member 2 [Source:MGI Symbol;Acc:MGI:2444981]	Phldb2	protein_coding	-1	yellow	-0.324113	0.304053	0.305489	0.334242	0.819729	0.00109831	-0.574429	0.0507668	-0.561177	0.0576428	0.662696	0.0188488	-0.582299	0.0469675	0.44717	0.144972	0.372697	0.232814	0.481125	0.1133	-0.217819	0.496455	0.703589	0.0106716	-0.247394	0.438204	0.433417	0.159266	-0.492487	0.103823	0.651828	0.0216335	0.214403	0.503398	0.506012	0.0932484	-0.674582	0.016114	-0.207231	0.518114
ENSMUSG00000040782	159232320	159347640	COP1, E3 ubiquitin ligase [Source:MGI Symbol;Acc:MGI:1347046]	Cop1	protein_coding	1	yellow	-0.44369	0.148507	0.375416	0.229152	0.726312	0.00747217	-0.645243	0.02346	-0.764494	0.00378208	0.809374	0.00142544	-0.768342	0.00350761	0.43974	0.152588	0.377049	0.22697	0.520609	0.0826766	-0.359341	0.251302	0.806	0.00154675	-0.287572	0.364754	0.583312	0.0464937	-0.484158	0.110716	0.844407	0.000549705	0.214998	0.502187	0.641462	0.0245579	-0.763688	0.00384163	-0.292523	0.35618
ENSMUSG00000043162	57686576	57692078	Pigy upstream reading frame [Source:MGI Symbol;Acc:MGI:1913709]	Pyurf	protein_coding	-1	yellow	0.253367	0.426859	-0.320806	0.309298	0.175042	0.586352	-0.457373	0.134919	0.180146	0.575302	0.129883	0.687448	-0.293258	0.354918	-0.269337	0.397246	0.648289	0.0226017	0.407447	0.188623	-0.101218	0.75428	0.527232	0.0781609	0.444286	0.147898	0.279638	0.378715	-0.467518	0.125382	0.324275	0.303798	0.325871	0.301285	0.320605	0.309618	-0.355585	0.256652	0.362437	0.246942
ENSMUSG00000004233	99141068	99239186	tryptophanyl tRNA synthetase 2 (mitochondrial) [Source:MGI Symbol;Acc:MGI:1917810]	Wars2	protein_coding	1	yellow	-0.18019	0.575209	0.214883	0.50242	0.779703	0.00278492	-0.600981	0.0387595	-0.526911	0.0783761	0.728586	0.00719722	-0.769767	0.00340994	0.165186	0.607919	0.501703	0.0965349	0.67688	0.015621	-0.374615	0.230227	0.856044	0.000380414	0.00194662	0.99521	0.346207	0.270297	-0.713466	0.0091761	0.668278	0.0175254	0.332132	0.291541	0.476192	0.117588	-0.697646	0.0116544	-0.083799	0.795695
ENSMUSG00000008604	88553758	88569725	ubiquilin 4 [Source:MGI Symbol;Acc:MGI:2150152]	Ubqln4	protein_coding	1	yellow	0.283716	0.371504	-0.0699827	0.828897	0.433637	0.15903	-0.378132	0.225528	-0.154185	0.632333	0.53644	0.0721665	-0.467681	0.125233	-0.131649	0.683392	0.578851	0.0486064	0.708567	0.00989686	-0.141991	0.659794	0.675059	0.0160108	0.332796	0.290518	0.497257	0.100006	-0.671924	0.0166984	0.433069	0.159639	0.328305	0.297475	0.466818	0.126026	-0.513811	0.0874932	0.403234	0.19368
ENSMUSG00000043241	5951469	6056703	UPF2 regulator of nonsense transcripts homolog (yeast) [Source:MGI Symbol;Acc:MGI:2449307]	Upf2	protein_coding	1	yellow	-0.142241	0.659226	-0.159012	0.621578	0.442858	0.149361	-0.639074	0.0252702	-0.446531	0.145617	0.526834	0.0784275	-0.811311	0.00135919	-0.105111	0.745102	0.831237	0.000806123	0.679603	0.0150512	-0.650791	0.0219139	0.882013	0.000147247	0.246027	0.44082	0.437056	0.1554	-0.475132	0.118523	0.717418	0.00862383	0.744281	0.00550077	0.835703	0.000710589	-0.362678	0.246605	-0.151821	0.637625
ENSMUSG00000021027	55602896	55821167	Ral GTPase activating protein, alpha subunit 1 [Source:MGI Symbol;Acc:MGI:1931050]	Ralgapa1	protein_coding	-1	yellow	-0.0551344	0.864866	-0.130536	0.685946	0.690344	0.012952	-0.803891	0.00162648	-0.256224	0.421483	0.594896	0.0413109	-0.627043	0.0290888	0.12095	0.708081	0.642236	0.0243302	0.645941	0.0232612	-0.409	0.186779	0.816429	0.00119552	0.104861	0.745691	0.457881	0.13443	-0.538186	0.0710668	0.696697	0.0118173	0.660739	0.0193297	0.684025	0.0141587	-0.561859	0.0572742	-0.106455	0.741939
ENSMUSG00000096326	115868773	115869227	immunoglobulin heavy variable 1-78 [Source:MGI Symbol;Acc:MGI:4439736]	Ighv1-78	IG_V_gene	-1	yellow	-0.384151	0.217623	-0.274499	0.387904	0.412232	0.182979	-0.551139	0.0632653	-0.625386	0.0296455	0.459696	0.132695	-0.656834	0.0203161	0.00734811	0.981918	0.419382	0.174744	0.324124	0.304035	-0.0552542	0.864575	0.616671	0.0327006	0.00867796	0.978646	-0.126545	0.695135	-0.230413	0.471237	0.480944	0.113456	0.196491	0.54049	0.116443	0.718558	-0.281573	0.375285	0.4666	0.126226
ENSMUSG00000027763	60472830	60629750	muscleblind like splicing factor 1 [Source:MGI Symbol;Acc:MGI:1928482]	Mbnl1	protein_coding	1	yellow	-0.209242	0.513969	0.383019	0.219097	0.834322	0.000739142	-0.644631	0.0236352	-0.423847	0.169721	0.828798	0.000862335	-0.650298	0.0220483	0.40586	0.190518	0.404576	0.192059	0.592301	0.0424342	-0.312689	0.322385	0.757793	0.00429859	-0.226852	0.478306	0.395785	0.202823	-0.572002	0.0519803	0.824958	0.000956897	0.2857	0.368023	0.568848	0.0535882	-0.779765	0.00278128	-0.281667	0.375119
ENSMUSG00000057637	143107391	143212995	PR domain containing 2, with ZNF domain [Source:MGI Symbol;Acc:MGI:107628]	Prdm2	protein_coding	-1	yellow	0.228028	0.475966	-0.0718907	0.824295	0.267852	0.399955	-0.430578	0.162323	-0.350359	0.264205	0.565657	0.0552497	-0.834841	0.000728304	-0.443575	0.148625	0.670842	0.0169408	0.895054	8.38603e-05	-0.775228	0.00305448	0.852371	0.000428688	0.544925	0.0669298	0.552177	0.062667	-0.755288	0.00450479	0.498688	0.09888	0.723076	0.00787695	0.718289	0.00850564	-0.335682	0.286096	-0.0813919	0.801458
ENSMUSG00000026031	58711508	58758884	CASP8 and FADD-like apoptosis regulator [Source:MGI Symbol;Acc:MGI:1336166]	Cflar	protein_coding	1	yellow	-0.295485	0.351103	0.303724	0.337185	0.634078	0.0268088	-0.598675	0.0397126	-0.513996	0.0873597	0.695206	0.0120767	-0.565652	0.0552523	0.38774	0.212989	0.193633	0.546513	0.436638	0.155841	-0.357551	0.253844	0.573885	0.0510369	-0.27937	0.379192	0.414862	0.179922	-0.334458	0.287967	0.678776	0.0152226	0.329745	0.295234	0.533854	0.0738174	-0.539648	0.0701548	-0.413515	0.181483
ENSMUSG00000038844	142617474	142901531	kinesin family member 16B [Source:MGI Symbol;Acc:MGI:1098240]	Kif16b	protein_coding	-1	yellow	0.178611	0.578618	-0.293628	0.354282	0.34611	0.270439	-0.5476	0.065335	-0.350245	0.264371	0.528	0.0776481	-0.75358	0.00464962	-0.342658	0.275567	0.655785	0.020587	0.783229	0.00258553	-0.576527	0.0497337	0.821757	0.00104169	0.497768	0.0996029	0.341518	0.277271	-0.482873	0.111807	0.458543	0.133795	0.684725	0.014021	0.630316	0.0280115	-0.148271	0.6456	0.129812	0.68761
ENSMUSG00000065676	78183056	78183124	small nucleolar RNA, C/D box 42B [Source:MGI Symbol;Acc:MGI:3819533]	Snord42b	snoRNA	-1	yellow	0.0732011	0.821138	0.369368	0.237343	0.242529	0.447551	-0.12714	0.693763	-0.164326	0.609815	0.521538	0.0820326	-0.50699	0.0925127	-0.0328644	0.919239	0.388349	0.21221	0.573161	0.0513984	-0.705343	0.0103936	0.477688	0.116277	0.0649664	0.841018	0.461686	0.130809	-0.468133	0.124819	0.542763	0.0682383	0.500698	0.0973121	0.714101	0.00908566	-0.367233	0.240277	-0.601026	0.0387411
ENSMUSG00000002428	20057811	20118490	helicase-like transcription factor [Source:MGI Symbol;Acc:MGI:1196437]	Hltf	protein_coding	1	yellow	-0.444047	0.148142	0.251858	0.429712	0.793563	0.00206351	-0.749199	0.00503713	-0.714704	0.00900033	0.757639	0.00431106	-0.696684	0.0118195	0.469238	0.123811	0.340226	0.279211	0.459021	0.133339	-0.208755	0.514971	0.765729	0.00369229	-0.295786	0.35059	0.437325	0.155116	-0.407903	0.18808	0.780056	0.00276441	0.200288	0.532533	0.511352	0.089281	-0.691603	0.0127211	-0.152123	0.636947
ENSMUSG00000028842	126331704	126429556	argonaute RISC catalytic subunit 3 [Source:MGI Symbol;Acc:MGI:2446634]	Ago3	protein_coding	-1	yellow	0.285495	0.368382	-0.397342	0.200891	0.226996	0.478019	-0.575651	0.0501633	-0.0186491	0.954127	0.269255	0.397394	-0.62794	0.0287907	-0.489151	0.106548	0.909721	4.05221e-05	0.753461	0.00465982	-0.628794	0.0285088	0.780461	0.00274109	0.649656	0.0222239	0.425063	0.168369	-0.611632	0.0345667	0.444015	0.148174	0.886437	0.000122575	0.733543	0.00662404	-0.196152	0.541203	0.0478154	0.882687
ENSMUSG00000049327	124439930	124462308	lysine methyltransferase 5A [Source:MGI Symbol;Acc:MGI:1915206]	Kmt5a	protein_coding	1	yellow	-0.19784	0.537658	0.238331	0.455692	0.50418	0.0946359	-0.575385	0.0502941	-0.619928	0.0315336	0.631266	0.0277041	-0.861724	0.000314185	0.0242637	0.940335	0.642774	0.0241728	0.698363	0.0115324	-0.676456	0.015711	0.896439	7.86623e-05	0.127187	0.693654	0.666286	0.0179895	-0.624152	0.0300653	0.733476	0.00663162	0.504076	0.0947151	0.82357	0.000992999	-0.550542	0.0636109	-0.374146	0.230858
ENSMUSG00000016409	37126795	37150746	NFKB activating protein [Source:MGI Symbol;Acc:MGI:1914300]	Nkap	protein_coding	1	yellow	0.122421	0.704669	0.0399483	0.901899	0.504212	0.0946118	-0.570777	0.0526011	-0.356896	0.254777	0.575729	0.0501247	-0.728201	0.00724314	-0.128716	0.690131	0.599662	0.0393025	0.788163	0.00232507	-0.570314	0.0528366	0.869445	0.000238949	0.349533	0.26541	0.673135	0.0164302	-0.730879	0.00692768	0.540461	0.0696511	0.534099	0.0736597	0.695295	0.0120611	-0.522353	0.0814708	-0.124035	0.700932
ENSMUSG00000067736	24612407	24612700	predicted gene 10222 [Source:MGI Symbol;Acc:MGI:3642643]	Gm10222	unprocessed_pseudogene	-1	yellow	0.134812	0.676145	-0.0372051	0.908609	0.381776	0.220722	-0.523451	0.0807177	-0.301138	0.341521	0.565376	0.0553977	-0.79033	0.00221725	-0.24508	0.442638	0.780342	0.00274791	0.836556	0.000693386	-0.743184	0.0056084	0.900158	6.59405e-05	0.419467	0.174647	0.66415	0.0184972	-0.708671	0.00988105	0.639257	0.0252153	0.723771	0.0077887	0.867501	0.000256395	-0.46833	0.124639	-0.195346	0.5429
ENSMUSG00000081309	40912741	40913355	predicted gene 12397 [Source:MGI Symbol;Acc:MGI:3649202]	Gm12397	processed_pseudogene	-1	yellow	-0.494241	0.102408	0.278662	0.380451	0.700835	0.011119	-0.652011	0.0215842	-0.755523	0.00448515	0.829847	0.000837799	-0.770005	0.00339383	0.452223	0.139935	0.375193	0.229452	0.46387	0.128759	-0.345681	0.271073	0.770944	0.0033308	-0.334922	0.287256	0.384807	0.216771	-0.315397	0.317986	0.884131	0.000134998	0.241131	0.450254	0.612709	0.0341613	-0.649555	0.0222518	-0.249121	0.434908
ENSMUSG00000065947	9877	10173	mitochondrially encoded NADH dehydrogenase 4L [Source:MGI Symbol;Acc:MGI:102497]	mt-Nd4l	protein_coding	1	yellow	0.134529	0.676792	-0.0368656	0.90944	0.382183	0.220189	-0.523557	0.080645	-0.301337	0.341186	0.565505	0.0553299	-0.790418	0.00221295	-0.244717	0.443335	0.780113	0.00276113	0.836586	0.000692771	-0.743472	0.00557996	0.900205	6.5791e-05	0.419117	0.175045	0.664332	0.0184536	-0.708891	0.00984794	0.639306	0.0252005	0.723937	0.00776764	0.867588	0.000255597	-0.468616	0.124378	-0.196055	0.541408
ENSMUSG00000114759	100946405	100946815	predicted gene 10257 [Source:MGI Symbol;Acc:MGI:3644245]	Gm10257	processed_pseudogene	-1	yellow	0.200704	0.531666	-0.416335	0.178224	0.352748	0.260736	-0.660786	0.019318	-0.154999	0.630514	0.306781	0.332098	-0.682659	0.0144302	-0.459913	0.132488	0.671432	0.0168083	0.709771	0.00971586	-0.601664	0.0384801	0.750874	0.00488626	0.593094	0.0420887	0.129126	0.689189	-0.521149	0.0823017	0.317916	0.313923	0.827784	0.000886561	0.477476	0.116462	-0.0404688	0.900626	0.0400419	0.90167
ENSMUSG00000051149	168180986	168207112	activity-dependent neuroprotective protein [Source:MGI Symbol;Acc:MGI:1338758]	Adnp	protein_coding	-1	yellow	0.0412456	0.898727	0.119453	0.711554	0.481726	0.112786	-0.315627	0.317614	-0.410208	0.185353	0.767071	0.00359659	-0.743923	0.00553567	-0.0222719	0.945227	0.532996	0.0743703	0.755007	0.00452838	-0.587714	0.0444731	0.78297	0.00259983	0.147067	0.648314	0.387064	0.213858	-0.521927	0.0817645	0.654455	0.0209346	0.463677	0.12894	0.688286	0.0133364	-0.450392	0.141747	-0.120496	0.709132
ENSMUSG00000027009	79255426	79333123	integrin alpha 4 [Source:MGI Symbol;Acc:MGI:96603]	Itga4	protein_coding	1	yellow	0.208424	0.515653	0.013071	0.96784	0.192085	0.549788	-0.426802	0.166449	-0.135983	0.673468	0.350101	0.264581	-0.682358	0.0144905	-0.412241	0.182968	0.643341	0.0240076	0.730491	0.00697272	-0.843944	0.000557474	0.698727	0.0114708	0.499073	0.0985783	0.492047	0.104179	-0.649619	0.0222342	0.442832	0.149388	0.771829	0.00327225	0.728024	0.00726445	-0.236482	0.459301	-0.423271	0.170364
ENSMUSG00000036437	66697192	66706792	neuropeptide Y receptor Y1 [Source:MGI Symbol;Acc:MGI:104963]	Npy1r	protein_coding	1	yellow	0.1068	0.741128	-0.0931636	0.773363	0.333567	0.289333	-0.489861	0.105965	-0.337871	0.282768	0.423808	0.169765	-0.763851	0.00382951	-0.401288	0.196043	0.611749	0.0345225	0.73537	0.00642174	-0.497356	0.0999277	0.809425	0.00142367	0.493908	0.102675	0.390986	0.208851	-0.853508	0.000413271	0.396222	0.20228	0.476571	0.117255	0.384239	0.217508	-0.483354	0.111398	0.15349	0.633887
ENSMUSG00000020570	32953891	32979860	synaptophysin-like protein [Source:MGI Symbol;Acc:MGI:108081]	Sypl	protein_coding	1	yellow	0.269583	0.396799	-0.522538	0.0813437	0.30309	0.338245	-0.696523	0.0118473	0.058103	0.857654	0.0847593	0.793398	-0.436841	0.155627	-0.377496	0.226374	0.835517	0.000714382	0.593907	0.0417364	-0.425061	0.168372	0.6673	0.017752	0.613329	0.03393	0.335974	0.285651	-0.410357	0.185178	0.283524	0.371842	0.852802	0.000422799	0.627729	0.0288605	-0.0082006	0.979821	0.0939575	0.771477
ENSMUSG00000024423	12955852	12992950	impact, RWD domain protein [Source:MGI Symbol;Acc:MGI:1098233]	Impact	protein_coding	1	yellow	0.152029	0.637158	0.244865	0.443051	0.619852	0.0315604	-0.514785	0.0867912	0.0254587	0.937402	0.368178	0.238976	-0.364797	0.243648	0.107656	0.739116	0.397886	0.200218	0.534153	0.073625	-0.369591	0.237039	0.580344	0.0478921	0.138154	0.668516	0.475166	0.118493	-0.648229	0.0226184	0.396345	0.202126	0.381492	0.221095	0.478656	0.115433	-0.53982	0.0700478	-0.396414	0.202041
ENSMUSG00000029208	69556923	69575973	GUF1 homolog, GTPase [Source:MGI Symbol;Acc:MGI:2140726]	Guf1	protein_coding	1	yellow	-0.247905	0.437228	-0.21333	0.505587	0.487843	0.10763	-0.600146	0.0391025	-0.490796	0.105198	0.299187	0.344813	-0.626935	0.0291248	-0.0978499	0.762245	0.355368	0.256963	0.384692	0.216921	-0.2189	0.494267	0.625745	0.0295245	0.170115	0.597095	-0.0413707	0.898421	-0.439335	0.15301	0.271425	0.393453	0.305818	0.333696	0.0672511	0.835493	-0.25942	0.41551	0.188373	0.557669
ENSMUSG00000033014	103279293	103358775	tripartite motif-containing 33 [Source:MGI Symbol;Acc:MGI:2137357]	Trim33	protein_coding	1	yellow	-0.131587	0.683533	0.00524922	0.987082	0.637087	0.0258743	-0.784792	0.00250074	-0.350571	0.263896	0.610082	0.0351555	-0.662976	0.0187809	0.161109	0.616926	0.754338	0.00458494	0.644643	0.0236317	-0.397181	0.201089	0.851351	0.000442907	0.0591978	0.854997	0.632732	0.0272349	-0.572871	0.0515435	0.817675	0.00115807	0.603301	0.0378167	0.821609	0.00104574	-0.65727	0.0202041	-0.129128	0.689183
ENSMUSG00000041229	151520672	151633859	PHD finger protein 8 [Source:MGI Symbol;Acc:MGI:2444341]	Phf8	protein_coding	1	yellow	0.231966	0.468169	0.0326722	0.91971	0.258196	0.417793	-0.44414	0.148047	-0.265095	0.405008	0.499831	0.0979859	-0.758257	0.0042612	-0.363526	0.245419	0.757133	0.00435225	0.859097	0.000343584	-0.771963	0.00326345	0.841992	0.000591175	0.51182	0.0889385	0.743147	0.00561202	-0.768881	0.0034704	0.559493	0.0585608	0.717135	0.00866262	0.864264	0.000287646	-0.416259	0.178312	-0.222446	0.48712
ENSMUSG00000094574	13179443	13179580	predicted gene 15027 [Source:MGI Symbol;Acc:MGI:3709653]	Gm15027	unprocessed_pseudogene	1	yellow	-0.404356	0.192324	0.265299	0.404633	0.661706	0.0190911	-0.659657	0.0195994	-0.758563	0.00423673	0.793981	0.00204426	-0.82802	0.000880881	0.292774	0.355749	0.511586	0.0891096	0.56692	0.0545881	-0.299671	0.343995	0.867594	0.000255539	-0.160967	0.61724	0.51815	0.0843975	-0.560231	0.0581575	0.860833	0.000323931	0.206572	0.519474	0.591343	0.0428547	-0.777229	0.0029316	-0.040498	0.900555
ENSMUSG00000040624	3740364	3967303	pleckstrin homology domain containing, family G (with RhoGef domain) member 1 [Source:MGI Symbol;Acc:MGI:2676551]	Plekhg1	protein_coding	1	yellow	0.0723812	0.823113	-0.205671	0.521339	0.509158	0.090897	-0.642093	0.0243722	-0.36542	0.242783	0.557537	0.0596396	-0.79371	0.00205673	-0.211105	0.510142	0.688289	0.0133357	0.812536	0.00131857	-0.717627	0.00859536	0.880123	0.000158903	0.386068	0.215141	0.451995	0.140159	-0.594569	0.0414511	0.544732	0.0670459	0.834766	0.000729855	0.752866	0.00471122	-0.30047	0.342646	-0.162217	0.614472
ENSMUSG00000017291	77529162	77607815	TAO kinase 1 [Source:MGI Symbol;Acc:MGI:1914490]	Taok1	protein_coding	-1	yellow	-0.276412	0.38447	0.157035	0.625975	0.510979	0.0895543	-0.576492	0.0497508	-0.46542	0.127317	0.647541	0.0228103	-0.662676	0.0188536	0.246797	0.439347	0.614683	0.033428	0.536472	0.0721462	-0.499591	0.0981732	0.732528	0.00673855	-0.119434	0.711599	0.587542	0.0445507	-0.402721	0.194301	0.849903	0.00046372	0.526938	0.0783575	0.850685	0.000452385	-0.595164	0.0411962	-0.342383	0.275977
ENSMUSG00000024283	7868832	7929028	WW domain containing adaptor with coiled-coil [Source:MGI Symbol;Acc:MGI:2387357]	Wac	protein_coding	1	yellow	0.0128873	0.968292	-0.0343874	0.915508	0.431537	0.161286	-0.619522	0.0316773	-0.421175	0.172716	0.573679	0.0511397	-0.860422	0.000328502	-0.209814	0.512793	0.835527	0.000714169	0.822324	0.00102626	-0.739749	0.00595572	0.944401	3.8097e-06	0.374362	0.230567	0.618772	0.0319442	-0.6767	0.0156592	0.699056	0.0114153	0.751574	0.00482413	0.889266	0.000108586	-0.442342	0.149891	-0.205477	0.521739
ENSMUSG00000027428	144542265	144550869	retinoblastoma binding protein 9, serine hydrolase [Source:MGI Symbol;Acc:MGI:1347074]	Rbbp9	protein_coding	-1	yellow	-0.0177712	0.956285	-0.101978	0.752487	0.323938	0.304329	-0.421867	0.171938	-0.461007	0.13145	0.621965	0.0308193	-0.704008	0.0106045	-0.10431	0.746987	0.60727	0.0362422	0.633689	0.0269316	-0.341848	0.276778	0.77382	0.0031433	0.228241	0.475543	0.425011	0.168428	-0.450575	0.141565	0.621539	0.0309676	0.338783	0.281387	0.582067	0.0470767	-0.435478	0.157069	0.266825	0.401832
ENSMUSG00000083027	146942476	146945825	predicted gene 13140 [Source:MGI Symbol;Acc:MGI:3649297]	Gm13140	processed_pseudogene	1	yellow	-0.452396	0.139764	0.176403	0.583399	0.760304	0.00409915	-0.756178	0.00443071	-0.700872	0.0111128	0.791392	0.00216582	-0.813401	0.00129042	0.37096	0.235171	0.53406	0.073685	0.533485	0.0740546	-0.314584	0.319303	0.880099	0.000159055	-0.216076	0.499993	0.414604	0.180221	-0.483214	0.111516	0.897181	7.59806e-05	0.296521	0.349336	0.604709	0.0372527	-0.756165	0.00443179	-0.104664	0.746154
ENSMUSG00000097347	NA	NA	NA	NA	NA	NA	yellow	-0.440294	0.152011	0.228969	0.474098	0.563996	0.0561287	-0.58519	0.0456236	-0.673537	0.016342	0.610711	0.0349158	-0.797862	0.00187189	0.178614	0.578612	0.344366	0.273022	0.455983	0.13626	-0.561739	0.057339	0.703244	0.0107267	-0.140659	0.662818	0.202964	0.526955	-0.390973	0.208868	0.662873	0.0188057	0.391117	0.208686	0.482311	0.112285	-0.437903	0.154509	-0.436187	0.156318
ENSMUSG00000036167	93398350	93491510	periphilin 1 [Source:MGI Symbol;Acc:MGI:1917029]	Pphln1	protein_coding	1	yellow	-0.188709	0.556955	0.275263	0.38653	0.860393	0.000328827	-0.627963	0.0287832	-0.522087	0.0816542	0.737643	0.00617655	-0.643683	0.0239084	0.365058	0.243286	0.358523	0.252462	0.60847	0.0357755	-0.344829	0.272336	0.767142	0.00359159	-0.136724	0.671777	0.434878	0.157706	-0.52738	0.0780621	0.637548	0.0257335	0.333285	0.289766	0.556543	0.0601932	-0.603053	0.0379167	-0.270717	0.394736
ENSMUSG00000068823	103020426	103058186	cold shock domain containing E1, RNA binding [Source:MGI Symbol;Acc:MGI:92356]	Csde1	protein_coding	1	yellow	-0.48835	0.10721	0.197154	0.539098	0.720856	0.00816406	-0.747473	0.00519639	-0.70764	0.0100378	0.782462	0.00262794	-0.820694	0.0010711	0.375103	0.229571	0.571103	0.0524353	0.508287	0.0915437	-0.328358	0.297393	0.871869	0.000218498	-0.236891	0.458501	0.404136	0.192589	-0.442437	0.149794	0.941596	4.84952e-06	0.297117	0.348323	0.642628	0.0242154	-0.741536	0.00577309	-0.134822	0.676122
ENSMUSG00000064367	11742	13565	mitochondrially encoded NADH dehydrogenase 5 [Source:MGI Symbol;Acc:MGI:102496]	mt-Nd5	protein_coding	1	yellow	-0.171401	0.594286	0.143591	0.656167	0.535919	0.072497	-0.607096	0.0363105	-0.630158	0.0280629	0.724328	0.00771845	-0.96321	4.98949e-07	-0.0732884	0.820927	0.666265	0.0179945	0.782077	0.00264943	-0.682004	0.0145616	0.968841	2.19521e-07	0.188399	0.557615	0.524988	0.0796713	-0.724843	0.00765392	0.76403	0.0038163	0.535109	0.0730133	0.724011	0.0077584	-0.607741	0.0360586	-0.203643	0.525544
ENSMUSG00000021838	46882854	47105815	sterile alpha motif domain containing 4 [Source:MGI Symbol;Acc:MGI:1921730]	Samd4	protein_coding	1	yellow	0.0518026	0.872972	-0.0262215	0.93553	0.47392	0.119598	-0.471253	0.121986	-0.471163	0.122067	0.611745	0.0345239	-0.757471	0.00432469	-0.139467	0.665527	0.557484	0.0596689	0.780095	0.00276217	-0.541931	0.0687466	0.849402	0.000471095	0.306873	0.331945	0.618522	0.0320336	-0.725999	0.00751065	0.510929	0.0895912	0.511986	0.0888179	0.625909	0.029469	-0.530747	0.0758341	0.009825	0.975824
ENSMUSG00000042202	155601416	155623340	solute carrier family 35, member E2 [Source:MGI Symbol;Acc:MGI:2444240]	Slc35e2	protein_coding	1	yellow	0.249728	0.433753	-0.212105	0.508092	0.265588	0.404102	-0.474375	0.119193	-0.256952	0.420119	0.378741	0.224721	-0.779385	0.00280344	-0.518111	0.0844248	0.727454	0.00733308	0.824615	0.00096574	-0.708239	0.00994656	0.850581	0.000453879	0.660266	0.0194473	0.442996	0.149219	-0.74017	0.00591233	0.362609	0.246701	0.70008	0.011244	0.603839	0.0376007	-0.24495	0.442888	0.01103	0.97286
ENSMUSG00000037343	55015131	55072152	TATA-box binding protein associated factor 2 [Source:MGI Symbol;Acc:MGI:2443028]	Taf2	protein_coding	-1	yellow	0.163304	0.61207	-0.349376	0.265639	0.350215	0.264414	-0.473037	0.120385	0.145457	0.651947	-0.0171897	0.957714	-0.257915	0.418318	-0.220829	0.490374	0.637408	0.025776	0.366578	0.24118	-0.167918	0.601912	0.481005	0.113404	0.41325	0.181792	0.0640619	0.843207	-0.4046	0.19203	0.14742	0.647519	0.478429	0.115631	0.265125	0.404953	-0.125147	0.698363	0.161644	0.61574
ENSMUSG00000021699	108449948	109953461	phosphodiesterase 4D, cAMP specific [Source:MGI Symbol;Acc:MGI:99555]	Pde4d	protein_coding	1	yellow	0.382867	0.219295	-0.289351	0.36166	0.201929	0.52911	-0.474875	0.11875	-0.114924	0.722101	0.296694	0.349042	-0.691504	0.0127391	-0.598315	0.039863	0.788857	0.00229011	0.850303	0.000457903	-0.701427	0.0110216	0.808204	0.00146664	0.760881	0.00405434	0.516595	0.0854984	-0.751509	0.00482987	0.309307	0.327927	0.80303	0.00165991	0.663123	0.0187452	-0.184095	0.566813	0.0365691	0.910166
ENSMUSG00000091177	4445697	4471285	predicted gene 15494 [Source:MGI Symbol;Acc:MGI:3782940]	Gm15494	antisense	-1	yellow	0.411771	0.183519	-0.278382	0.380949	0.189653	0.554947	-0.484137	0.110735	0.225058	0.481887	0.0730229	0.821567	-0.399902	0.197737	-0.453237	0.138937	0.754657	0.00455793	0.628422	0.0286314	-0.541108	0.0692521	0.628733	0.0285289	0.66557	0.0181585	0.508592	0.0913169	-0.651184	0.0218073	0.249672	0.43386	0.722418	0.00796121	0.603442	0.0377599	-0.232984	0.466162	-0.0889579	0.783374
ENSMUSG00000041741	141249269	141507448	phosphodiesterase 3A, cGMP inhibited [Source:MGI Symbol;Acc:MGI:1860764]	Pde3a	protein_coding	1	yellow	0.335937	0.285708	-0.460033	0.132375	0.314722	0.31908	-0.582913	0.0466801	0.090653	0.779335	0.273638	0.389453	-0.47952	0.114683	-0.36916	0.237628	0.749898	0.00497374	0.656387	0.0204311	-0.367768	0.23954	0.706004	0.0102903	0.579579	0.048257	0.315691	0.317509	-0.547748	0.0652469	0.358366	0.252685	0.675804	0.0158505	0.51152	0.0891582	-0.254943	0.423888	0.267666	0.400294
ENSMUSG00000020687	104502745	104550620	cell division cycle 27 [Source:MGI Symbol;Acc:MGI:102685]	Cdc27	protein_coding	-1	yellow	-0.408021	0.18794	0.356485	0.255364	0.662285	0.0189491	-0.424487	0.169009	-0.712914	0.00925535	0.723581	0.0078127	-0.606578	0.0365136	0.45366	0.138523	0.293702	0.354155	0.436184	0.15632	-0.286304	0.366967	0.60875	0.0356675	-0.342706	0.275495	0.393108	0.206172	-0.286443	0.366723	0.686623	0.013653	0.21342	0.505405	0.577111	0.0494487	-0.506647	0.0927704	-0.272153	0.392134
ENSMUSG00000096150	116000028	116000461	immunoglobulin heavy variable 1-85 [Source:MGI Symbol;Acc:MGI:3645723]	Ighv1-85	IG_V_gene	-1	yellow	-0.00494499	0.987831	-0.34122	0.277718	0.171537	0.593987	-0.26607	0.403217	-0.200477	0.532139	0.0334945	0.917695	-0.392299	0.207192	-0.31327	0.321439	0.401783	0.19544	0.30387	0.336941	-0.324736	0.30307	0.365824	0.242224	0.34809	0.267524	-0.238023	0.456292	-0.108476	0.737192	0.0296828	0.927038	0.459915	0.132486	0.153589	0.633666	0.275699	0.385747	0.0871476	0.787692
ENSMUSG00000070337	97332109	97352077	G protein-coupled receptor 179 [Source:MGI Symbol;Acc:MGI:2443409]	Gpr179	protein_coding	-1	yellow	-0.0755422	0.815503	-0.103638	0.748571	0.145169	0.652597	-0.324063	0.304131	-0.500678	0.0973276	0.429521	0.163471	-0.684587	0.0140481	-0.301567	0.3408	0.541587	0.0689575	0.527923	0.0777	-0.240917	0.45067	0.647937	0.0226998	0.301927	0.340196	0.244663	0.44344	-0.540114	0.0698657	0.440991	0.151288	0.223013	0.485981	0.290937	0.358916	-0.37192	0.233867	0.426427	0.166861
ENSMUSG00000034839	60712989	60738801	La ribonucleoprotein domain family, member 6 [Source:MGI Symbol;Acc:MGI:1914807]	Larp6	protein_coding	1	yellow	0.262331	0.410106	-0.070515	0.827612	0.475093	0.118557	-0.498587	0.0989587	-0.128852	0.689819	0.476016	0.117743	-0.507863	0.0918596	-0.134567	0.676705	0.294106	0.353462	0.681726	0.0146176	-0.560331	0.0581029	0.616626	0.0327169	0.324797	0.302974	0.425368	0.168032	-0.533375	0.0741255	0.290676	0.359365	0.613779	0.0337626	0.495131	0.101695	-0.257372	0.419333	-0.24831	0.436455
ENSMUSG00000021681	95350683	95375352	angiogenic factor with G patch and FHA domains 1 [Source:MGI Symbol;Acc:MGI:1913799]	Aggf1	protein_coding	-1	yellow	-0.130751	0.685454	0.280577	0.377048	-0.0477007	0.882967	-0.125331	0.697938	-0.305467	0.33428	0.288936	0.362382	-0.562654	0.0568462	-0.152569	0.635948	0.582232	0.0469992	0.36404	0.244702	-0.538376	0.0709475	0.522772	0.081183	0.155178	0.630114	0.49311	0.103319	-0.380862	0.221921	0.576128	0.0499288	0.208482	0.515532	0.642897	0.024137	-0.381889	0.220574	-0.301418	0.34105
ENSMUSG00000038806	180851127	180868113	SDE2 telomere maintenance homolog (S. pombe) [Source:MGI Symbol;Acc:MGI:2384788]	Sde2	protein_coding	1	yellow	-0.29825	0.346399	-0.0570837	0.860129	0.430248	0.162682	-0.645017	0.0235245	-0.305397	0.334396	0.394414	0.204534	-0.522103	0.0816429	0.204576	0.523608	0.814077	0.00126873	0.353275	0.259975	-0.177294	0.581468	0.704812	0.0104772	-0.0320007	0.921356	0.452134	0.140023	-0.317114	0.315214	0.802252	0.0016906	0.354367	0.2584	0.702664	0.0108203	-0.577639	0.0491918	0.0446217	0.89048
ENSMUSG00000019943	98914406	99026143	ATPase, Ca++ transporting, plasma membrane 1 [Source:MGI Symbol;Acc:MGI:104653]	Atp2b1	protein_coding	1	yellow	-0.198785	0.535677	-0.0886533	0.7841	0.415038	0.179719	-0.578049	0.0489932	-0.47931	0.114866	0.396434	0.202016	-0.769554	0.00342439	-0.12843	0.690791	0.542494	0.0684022	0.524744	0.0798373	-0.664499	0.0184135	0.737944	0.00614465	0.222701	0.486609	0.132437	0.681585	-0.324737	0.303069	0.480283	0.114025	0.595021	0.0412571	0.542956	0.0681211	-0.115514	0.720724	-0.311239	0.324755
ENSMUSG00000031365	73342621	73359080	zinc finger protein 275 [Source:MGI Symbol;Acc:MGI:1350985]	Zfp275	protein_coding	1	yellow	-0.113346	0.725786	0.0340701	0.916285	0.632553	0.0272919	-0.684901	0.0139868	-0.405329	0.191154	0.623782	0.0301919	-0.626768	0.0291807	0.222174	0.487666	0.584724	0.0458386	0.615792	0.0330206	-0.482399	0.11221	0.787985	0.00233412	0.0200768	0.950619	0.617018	0.0325749	-0.390322	0.209694	0.712486	0.00931712	0.585343	0.0455533	0.842819	0.000576709	-0.467177	0.125695	-0.292133	0.356852
ENSMUSG00000024098	65921972	65951226	twisted gastrulation BMP signaling modulator 1 [Source:MGI Symbol;Acc:MGI:2137520]	Twsg1	protein_coding	-1	yellow	-0.0842533	0.794608	0.108569	0.736974	0.557452	0.0596867	-0.627034	0.029092	-0.581071	0.0475469	0.644531	0.0236639	-0.919378	2.34017e-05	-0.136301	0.672742	0.583296	0.0465011	0.790355	0.00221604	-0.682233	0.0145156	0.937306	6.86185e-06	0.276805	0.383766	0.492211	0.104046	-0.749049	0.00505091	0.608989	0.0355753	0.55099	0.0633516	0.629728	0.0282027	-0.509128	0.0909189	-0.220099	0.491845
ENSMUSG00000031146	7667941	7671390	proteolipid protein 2 [Source:MGI Symbol;Acc:MGI:1298382]	Plp2	protein_coding	-1	yellow	-0.597039	0.040399	0.147132	0.648168	0.564091	0.0560783	-0.56172	0.0573489	-0.782543	0.00262344	0.68678	0.0136228	-0.708699	0.00987681	0.371339	0.234655	0.389933	0.210189	0.288317	0.363456	-0.00932191	0.977062	0.691669	0.0127091	-0.324954	0.302727	0.154642	0.631311	-0.306072	0.333273	0.792937	0.00209266	-0.0561948	0.862289	0.277857	0.381886	-0.694419	0.0122153	0.241546	0.449451
[truncated: 14,550 more rows]

## Sheet: Genes in modules in PA network
Gene_ID	Gene_start_bp	Gene_end_bp	Gene_description	Gene_name	Gene_type	Strand	Module in PA network	MM.purple	p.MM.purple	MM.royalblue	p.MM.royalblue	MM.greenyellow	p.MM.greenyellow	MM.lightgreen	p.MM.lightgreen	MM.salmon	p.MM.salmon	MM.grey60	p.MM.grey60	MM.blue	p.MM.blue	MM.red	p.MM.red	MM.brown	p.MM.brown	MM.lightcyan	p.MM.lightcyan	MM.tan	p.MM.tan	MM.turquoise	p.MM.turquoise	MM.green	p.MM.green	MM.lightyellow	p.MM.lightyellow	MM.yellow	p.MM.yellow	MM.black	p.MM.black	MM.grey	p.MM.grey	MM.cyan	p.MM.cyan	MM.magenta	p.MM.magenta	MM.midnightblue	p.MM.midnightblue	MM.pink	p.MM.pink
[truncated: 15,315 more rows]

[truncated: 4 more sheets: Enrichment in MEturquoise in MD, Enrichment in MEturquoise in PA, Enrichment in MEyellow in MD, Enrichment in MEyellow in PA]
