# Supplementary material for: Multi-omics analysis detected multiple pathways by which pomegranate punicalagin exerts its biological effects in modulating host–microbiota interactions in murine colitis models
Source: Royal Society of Chemistry journal article supplement (doi:10.1039/d3fo00286a), 2023-01-01
Supplement: d3fo00286a5.xlsx [file d3fo00286a5.xlsx]

## Sheet: Sheet2
Abbreviation	Taxon name	Phylum	Class	Order	Family	Genus
Acinetoba	Acinetobacter	Proteobacteria	Gammaproteobacteria	Pseudomonadales	Moraxellaceae	Acinetobacter
Adlercreu	Adlercreutzia	Actinobacteria	Coriobacteriia	Coriobacteriales	Coriobacteriaceae	Adlercreutzia
AF12	AF12	Bacteroidetes	Bacteroidia	Bacteroidales	Rikenellaceae	AF12
Akkermans	Akkermansia	Verrucomicrobia	Verrucomicrobiae	Verrucomicrobiales	Verrucomicrobiaceae	Akkermansia
Allobacul	Allobaculum	Firmicutes	Erysipelotrichi	Erysipelotrichales	Erysipelotrichaceae	Allobaculum
Anaeropla	Anaeroplasma	Tenericutes	Mollicutes	Anaeroplasmatales	Anaeroplasmataceae	Anaeroplasma
Anaerotru	Anaerotruncus	Firmicutes	Clostridia	Clostridiales	Ruminococcaceae	Anaerotruncus
Anaerovib	Anaerovibrio	Firmicutes	Clostridia	Clostridiales	Veillonellaceae	Anaerovibrio
Azorhizob	Azorhizobium	Proteobacteria	Alphaproteobacteria	Rhizobiales	Xanthobacteraceae	Azorhizobium
Bacillus	Bacillus	Firmicutes	Bacilli	Bacillales	Bacillaceae	Bacillus
Bacteroid	Bacteroides	Bacteroidetes	Bacteroidia	Bacteroidales	Bacteroidaceae	Bacteroides
Bifidobac	Bifidobacterium	Actinobacteria	Actinobacteria	Bifidobacteriales	Bifidobacteriaceae	Bifidobacterium
Bilophila	Bilophila	Proteobacteria	Deltaproteobacteria	Desulfovibrionales	Desulfovibrionaceae	Bilophila
Blautia	Blautia	Firmicutes	Clostridia	Clostridiales	Lachnospiraceae	Blautia
Bradyrhiz	Bradyrhizobium	Proteobacteria	Alphaproteobacteria	Rhizobiales	Bradyrhizobiaceae	Bradyrhizobium
Brevundim	Brevundimonas	Proteobacteria	Alphaproteobacteria	Caulobacterales	Caulobacteraceae	Brevundimonas
Bulleidia	Bulleidia	Firmicutes	Erysipelotrichi	Erysipelotrichales	Erysipelotrichaceae	Bulleidia
Burkholde	Burkholderia	Proteobacteria	Betaproteobacteria	Burkholderiales	Burkholderiaceae	Burkholderia
Butyrivib	Butyrivibrio	Firmicutes	Clostridia	Clostridiales	Lachnospiraceae	Butyrivibrio
Candidatu	Candidatus Arthromitus	Firmicutes	Clostridia	Clostridiales	Clostridiaceae	Candidatus Arthromitus
Catenibac	Catenibacterium	Firmicutes	Erysipelotrichi	Erysipelotrichales	Erysipelotrichaceae	Catenibacterium
CF231	CF231	Bacteroidetes	Bacteroidia	Bacteroidales	[Paraprevotellaceae]	CF231
Clostridi	Clostridium	Firmicutes	Clostridia	Clostridiales	Clostridiaceae	Clostridium
Coprobac	Coprobacillus	Firmicutes	Erysipelotrichi	Erysipelotrichales	Erysipelotrichaceae	Coprobacillus
Coprococc	Coprococcus	Firmicutes	Clostridia	Clostridiales	Lachnospiraceae	Coprococcus
Corynebac	Corynebacterium	Actinobacteria	Actinobacteria	Actinomycetales	Corynebacteriaceae	Corynebacterium
Cupriavid	Cupriavidus	Proteobacteria	Betaproteobacteria	Burkholderiales	Oxalobacteraceae	Cupriavidus
Curtobact	Curtobacterium	Actinobacteria	Actinobacteria	Actinomycetales	Microbacteriaceae	Curtobacterium
Dehalobac	Dehalobacterium	Firmicutes	Clostridia	Clostridiales	Dehalobacteriaceae	Dehalobacterium
Delftia	Delftia	Proteobacteria	Betaproteobacteria	Burkholderiales	Comamonadaceae	Delftia
Desulfovi	Desulfovibrio	Proteobacteria	Deltaproteobacteria	Desulfovibrionales	Desulfovibrionaceae	Desulfovibrio
Dialister	Dialister	Firmicutes	Clostridia	Clostridiales	Veillonellaceae	Dialister
Dorea	Dorea	Firmicutes	Clostridia	Clostridiales	Lachnospiraceae	Dorea
eClostrid	eClostridium	Firmicutes	Erysipelotrichi	Erysipelotrichales	Erysipelotrichaceae	Clostridium
Enterobac	Enterobacter	Proteobacteria	Gammaproteobacteria	Enterobacteriales	Enterobacteriaceae	Enterobacter
Enterococ	Enterococcus	Firmicutes	Bacilli	Lactobacillales	Enterococcaceae	Enterococcus
Erwinia	Erwinia	Proteobacteria	Gammaproteobacteria	Enterobacteriales	Enterobacteriaceae	Erwinia
Escherich	Escherichia	Proteobacteria	Gammaproteobacteria	Enterobacteriales	Enterobacteriaceae	Escherichia
Eubacteri	[Eubacterium]	Firmicutes	Erysipelotrichi	Erysipelotrichales	Erysipelotrichaceae	[Eubacterium]
Faecaliba	Faecalibacterium	Firmicutes	Clostridia	Clostridiales	Ruminococcaceae	Faecalibacterium
Flavobact	Flavobacterium	Bacteroidetes	Flavobacteriia	Flavobacteriales	Flavobacteriaceae	Flavobacterium
g[Mogibac]	g[Mogibacteriaceae]	Firmicutes	Clostridia	Clostridiales	[Mogibacteriaceae]
gBacillal	gBacillales	Firmicutes	Bacilli	Bacillales
gBacteroi	gBacteroidales	Bacteroidetes	Bacteroidia	Bacteroidales
gBifidoba	gBifidobacteriaceae	Actinobacteria	Actinobacteria	Bifidobacteriales	Bifidobacteriaceae
gBradyrhi	gBradyrhizobiaceae	Proteobacteria	Alphaproteobacteria	Rhizobiales	Bradyrhizobiaceae
gBurkhold	gBurkholderiales	Proteobacteria	Betaproteobacteria	Burkholderiales
gCaulobac	gCaulobacteraceae	Proteobacteria	Alphaproteobacteria	Caulobacterales	Caulobacteraceae
gChristen	gChristensenellaceae	Firmicutes	Clostridia	Clostridiales	Christensenellaceae
gClost'cea	gClostridiaceae	Firmicutes	Clostridia	Clostridiales	Clostridiaceae
gClost'les	gClostridiales	Firmicutes	Clostridia	Clostridiales
gClost'm]*	gClostridium]*	Firmicutes	Clostridia	Clostridiales	Peptostreptococcaceae	[Clostridium]
gComamona	gComamonadaceae	Proteobacteria	Betaproteobacteria	Burkholderiales	Comamonadaceae
gCoriobac	gCoriobacteriaceae	Actinobacteria	Coriobacteriia	Coriobacteriales	Coriobacteriaceae
gDesulfov	gDesulfovibrionaceae	Proteobacteria	Deltaproteobacteria	Desulfovibrionales	Desulfovibrionaceae
gEnteroba	gEnterobacteriaceae	Proteobacteria	Gammaproteobacteria	Enterobacteriales	Enterobacteriaceae
gErysipel	gErysipelotrichaceae	Firmicutes	Erysipelotrichi	Erysipelotrichales	Erysipelotrichaceae
gF16	gF16	TM7	TM7-3	CW040	F16
gLachnosp	gLachnospiraceae	Firmicutes	Clostridia	Clostridiales	Lachnospiraceae
gMamiella	gMamiellaceae	Cyanobacteria	Chloroplast	Chlorophyta	Mamiellaceae
gMicrobac	gMicrobacteriaceae	Actinobacteria	Actinobacteria	Actinomycetales	Microbacteriaceae
gPelagiba	gPelagibacteraceae	Proteobacteria	Alphaproteobacteria	Rickettsiales	Pelagibacteraceae
gPeptococ	gPeptococcaceae	Firmicutes	Clostridia	Clostridiales	Peptococcaceae
gPeptostr	gPeptostreptococcaceae	Firmicutes	Clostridia	Clostridiales	Peptostreptococcaceae
gRF32	gRF32	Proteobacteria	Alphaproteobacteria	RF32
gRF39	gRF39	Tenericutes	Mollicutes	RF39
gRhizobia	gRhizobiales	Proteobacteria	Alphaproteobacteria	Rhizobiales
gRikenell	gRikenellaceae	Bacteroidetes	Bacteroidia	Bacteroidales	Rikenellaceae
gRumin'ace	gRuminococcaceae	Firmicutes	Clostridia	Clostridiales	Ruminococcaceae
gS24-7	gS24-7	Bacteroidetes	Bacteroidia	Bacteroidales	S24-7
gStreptop	gStreptophyta	Cyanobacteria	Chloroplast	Streptophyta
gVeillone	gVeillonellaceae	Firmicutes	Clostridia	Clostridiales	Veillonellaceae
gXanthomo	gXanthomonadaceae	Proteobacteria	Gammaproteobacteria	Xanthomonadales	Xanthomonadaceae
gYS2	gYS2	Cyanobacteria	4C0d-2	YS2
Lactobaci	Lactobacillus	Firmicutes	Bacilli	Lactobacillales	Lactobacillaceae	Lactobacillus
Lactococc	Lactococcus	Firmicutes	Bacilli	Lactobacillales	Streptococcaceae	Lactococcus
Listeria	Listeria	Firmicutes	Bacilli	Bacillales	Listeriaceae	Listeria
Megamonas	Megamonas	Firmicutes	Clostridia	Clostridiales	Veillonellaceae	Megamonas
Megasphae	Megasphaera	Firmicutes	Clostridia	Clostridiales	Veillonellaceae	Megasphaera
Mucispiri	Mucispirillum	Deferribacteres	Deferribacteres	Deferribacterales	Deferribacteraceae	Mucispirillum
Odoribact	Odoribacter	Bacteroidetes	Bacteroidia	Bacteroidales	[Odoribacteraceae]	Odoribacter
Oscillosp	Oscillospira	Firmicutes	Clostridia	Clostridiales	Ruminococcaceae	Oscillospira
Parabacte	Parabacteroides	Bacteroidetes	Bacteroidia	Bacteroidales	Porphyromonadaceae	Parabacteroides
pClostrid	pClostridium	Firmicutes	Clostridia	Clostridiales	Peptostreptococcaceae	Clostridium
Phascolar	Phascolarctobacterium	Firmicutes	Clostridia	Clostridiales	Veillonellaceae	Phascolarctobacterium
Prevot	Prevotella	Bacteroidetes	Bacteroidia	Bacteroidales	Prevotellaceae	Prevotella
Prevot]*	Prevotella]*	Bacteroidetes	Bacteroidia	Bacteroidales	[Paraprevotellaceae]	[Prevotella]
Pseudomon	Pseudomonas	Proteobacteria	Gammaproteobacteria	Pseudomonadales	Pseudomonadaceae	Pseudomonas
Ralstonia	Ralstonia	Proteobacteria	Betaproteobacteria	Burkholderiales	Oxalobacteraceae	Ralstonia
Rhizobium	Rhizobium	Proteobacteria	Alphaproteobacteria	Rhizobiales	Rhizobiaceae	Rhizobium
Roseburia	Roseburia	Firmicutes	Clostridia	Clostridiales	Lachnospiraceae	Roseburia
Ruminococ	Ruminococcus	Firmicutes	Clostridia	Clostridiales	Ruminococcaceae	Ruminococcus
SMB53	SMB53	Firmicutes	Clostridia	Clostridiales	Clostridiaceae	SMB53
Staphyloc	Staphylococcus	Firmicutes	Bacilli	Bacillales	Staphylococcaceae	Staphylococcus
Streptoco	Streptococcus	Firmicutes	Bacilli	Lactobacillales	Streptococcaceae	Streptococcus
Succinivi	Succinivibrio	Proteobacteria	Gammaproteobacteria	Aeromonadales	Succinivibrionaceae	Succinivibrio
Sutterell	Sutterella	Proteobacteria	Betaproteobacteria	Burkholderiales	Alcaligenaceae	Sutterella
Trabulsie	Trabulsiella	Proteobacteria	Gammaproteobacteria	Enterobacteriales	Enterobacteriaceae	Trabulsiella
Turicibac	Turicibacter	Firmicutes	Bacilli	Turicibacterales	Turicibacteraceae	Turicibacter
